# Supplementary material for: Extensive protein dosage compensation in aneuploid human cancers
Source: PubMed Central journal article supplement — Genome Res. 2022 Jul;32(7):1254–70. doi: 10.1101/gr.276378.121 (PMC9341510; doi:10.1101/gr.276378.121), 2022-07
Supplement: supp_gr.276378.121_Supplemental_Fig_S1.pdf [file supp_gr.276378.121_Supplemental_Fig_S1.pdf]

**A**

LS180

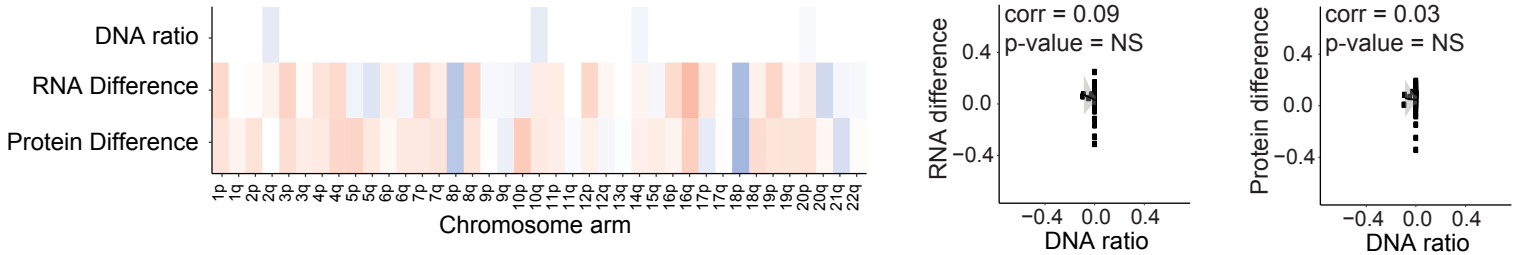

**B**

HCT116

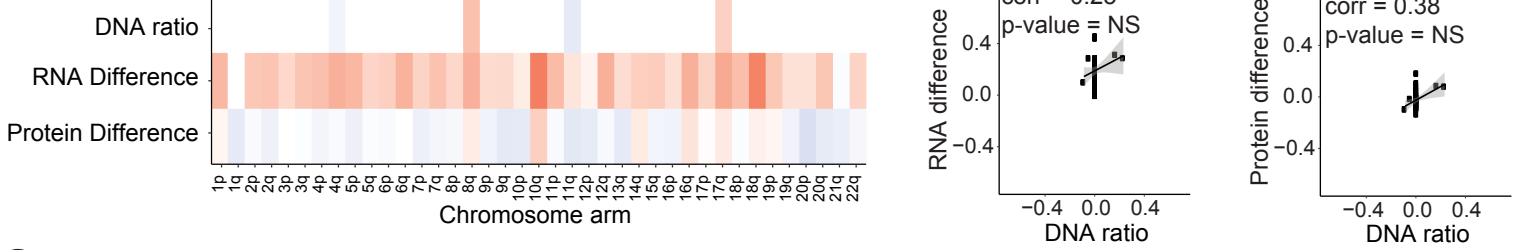

**C**

A2780

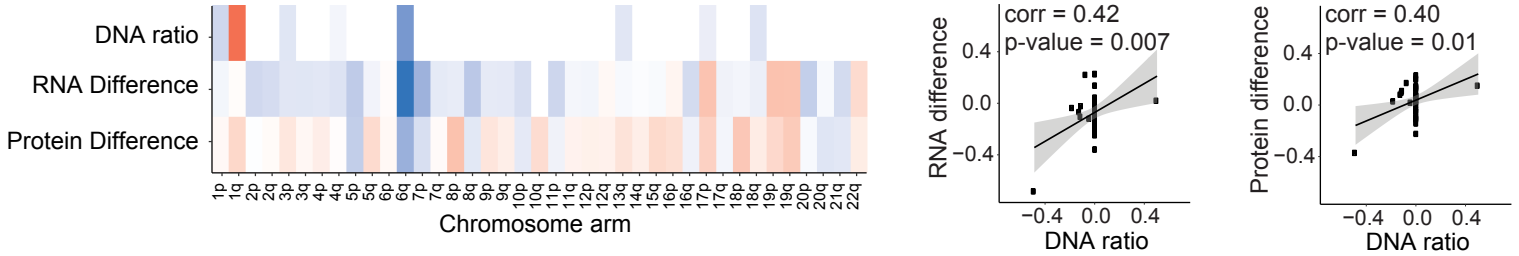

**D**

SKMEL2

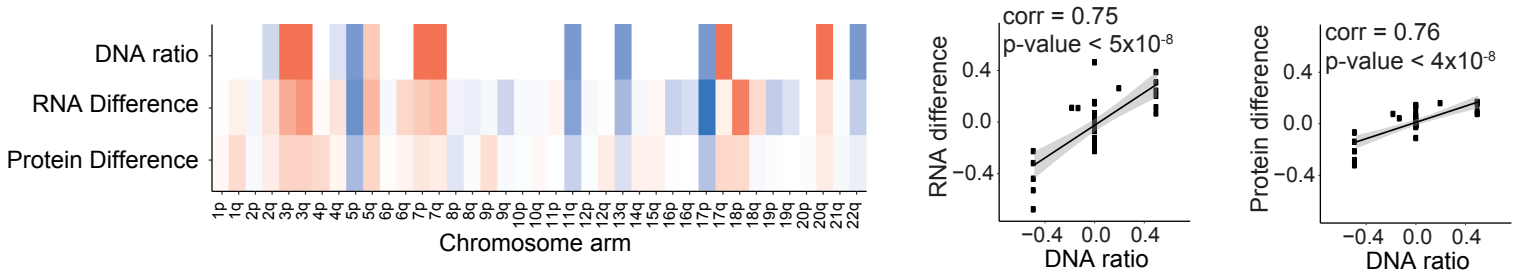

**E**

NCIH838

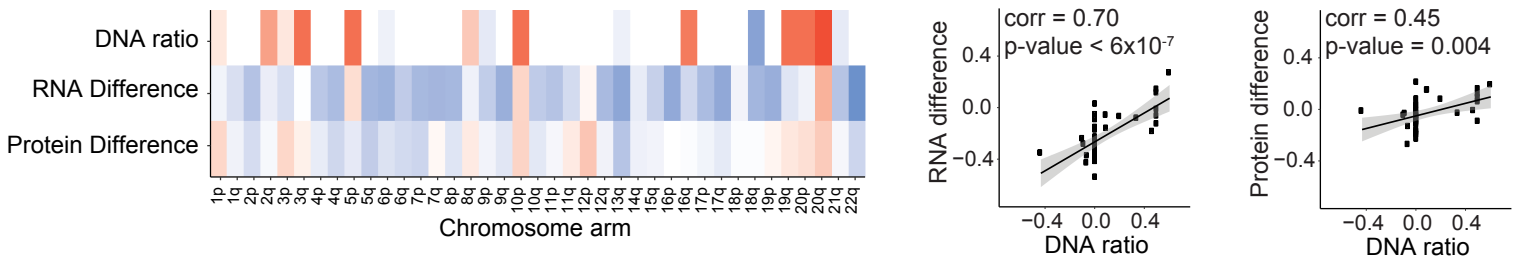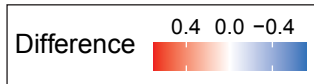

**F**

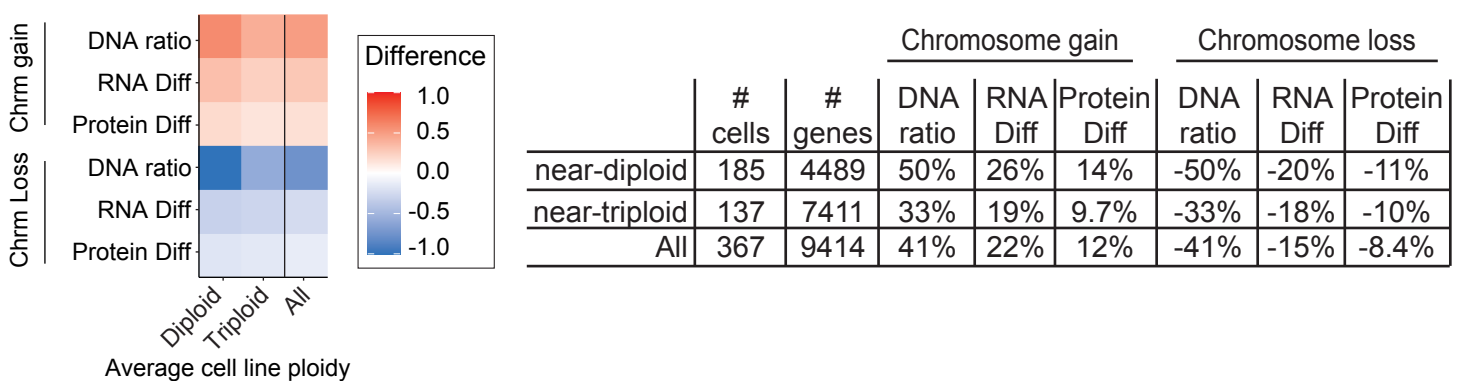

**Supplemental Figure S1. RNA and protein expression differences within individual cancer cell lines and expression differences split based on cell line ploidy.**

A-E) Heatmap of the DNA ratio, RNA expression difference, and protein expression difference, per chromosome arm, in the indicated cell lines relative to cells neutral for that chromosome arm (left). Scatterplots showing the relationship between the DNA ratio and the RNA or protein expression differences (right). A linear regression with 95% confidence intervals is plotted against the data.

F) Heatmap of the DNA ratio, and the difference in RNA and protein expression per chromosome arm, according to the cell line's basal ploidy (left). Table displaying the quantification of mean difference in RNA or protein expression upon chromosome gain or loss, per ploidy (right).
