# Supplementary material for: Extensive protein dosage compensation in aneuploid human cancers
Source: PubMed Central journal article supplement — Genome Res. 2022 Jul;32(7):1254–70. doi: 10.1101/gr.276378.121 (PMC9341510; doi:10.1101/gr.276378.121), 2022-07
Supplement: supp_gr.276378.121_Supplemental_Fig_S4.pdf [file supp_gr.276378.121_Supplemental_Fig_S4.pdf]

## Supplemental Figure S4

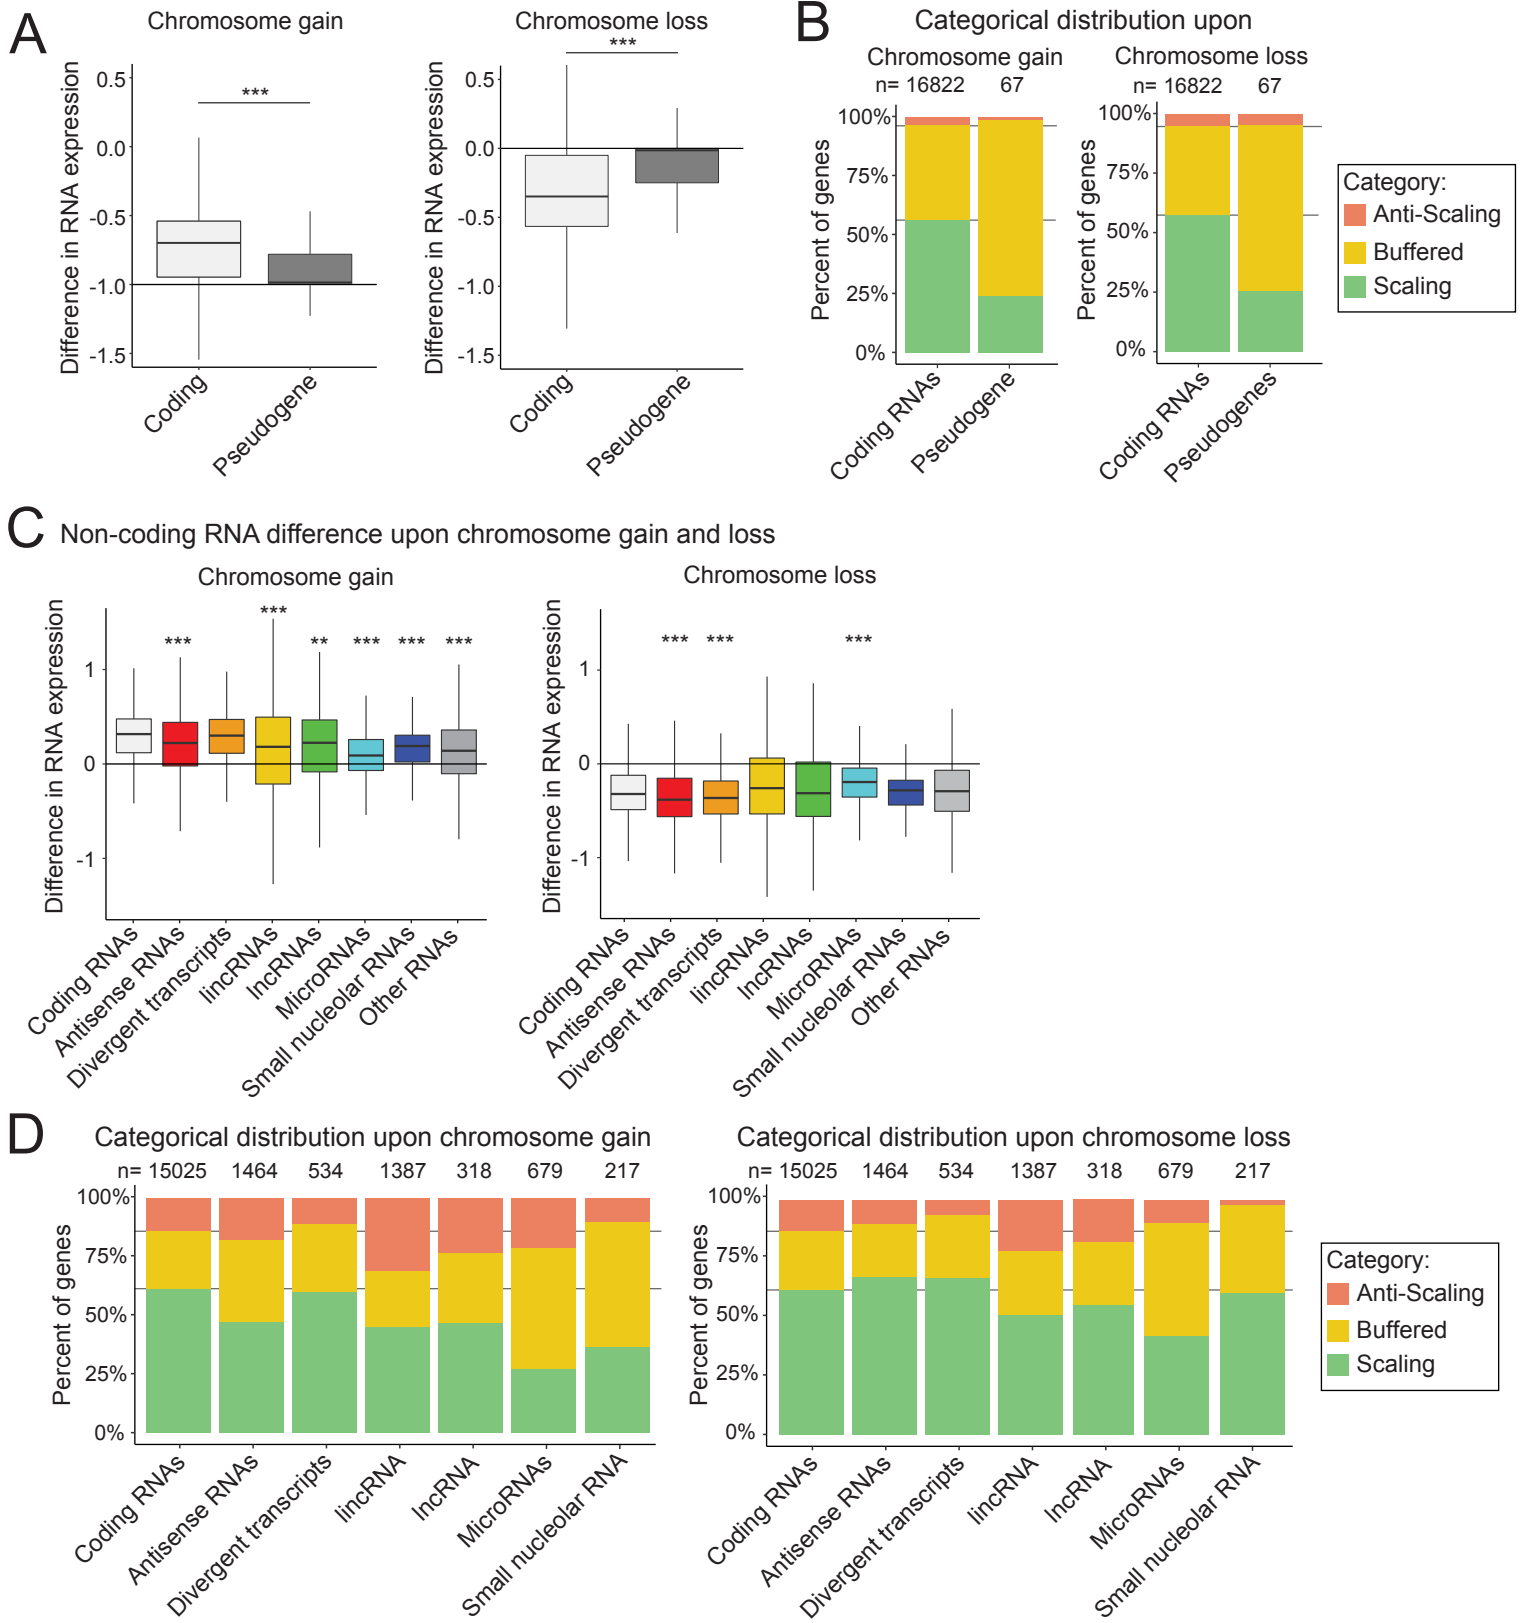

### Supplemental Figure S4. Pseudogenes and MicroRNAs are more dosage compensated than coding genes

A & C) Boxplots displaying the difference ( $\log_2$  fold change) in RNA expression upon chromosome gain or loss by RNA group. A & C are derived from different datasets. Boxplots display the 25th, 50th, and 75th percentile of the data, while the whiskers indicate a 1.5 interquartile range. P-values are from two-sided  $t$ -tests relative to coding RNA expression, with \* $< 0.01$ , \*\* $< 0.001$ , \*\*\* $< 0.0001$ , corrected for number of tests.

B & D) The percent of RNAs that fall into each difference category upon chromosome gain and loss per non-coding RNA group. B & D are derived from different datasets.
