# Supplementary material for: Extensive protein dosage compensation in aneuploid human cancers
Source: PubMed Central journal article supplement — Genome Res. 2022 Jul;32(7):1254–70. doi: 10.1101/gr.276378.121 (PMC9341510; doi:10.1101/gr.276378.121), 2022-07
Supplement: supp_gr.276378.121_Supplemental_Fig_S8.pdf [file supp_gr.276378.121_Supplemental_Fig_S8.pdf]

A

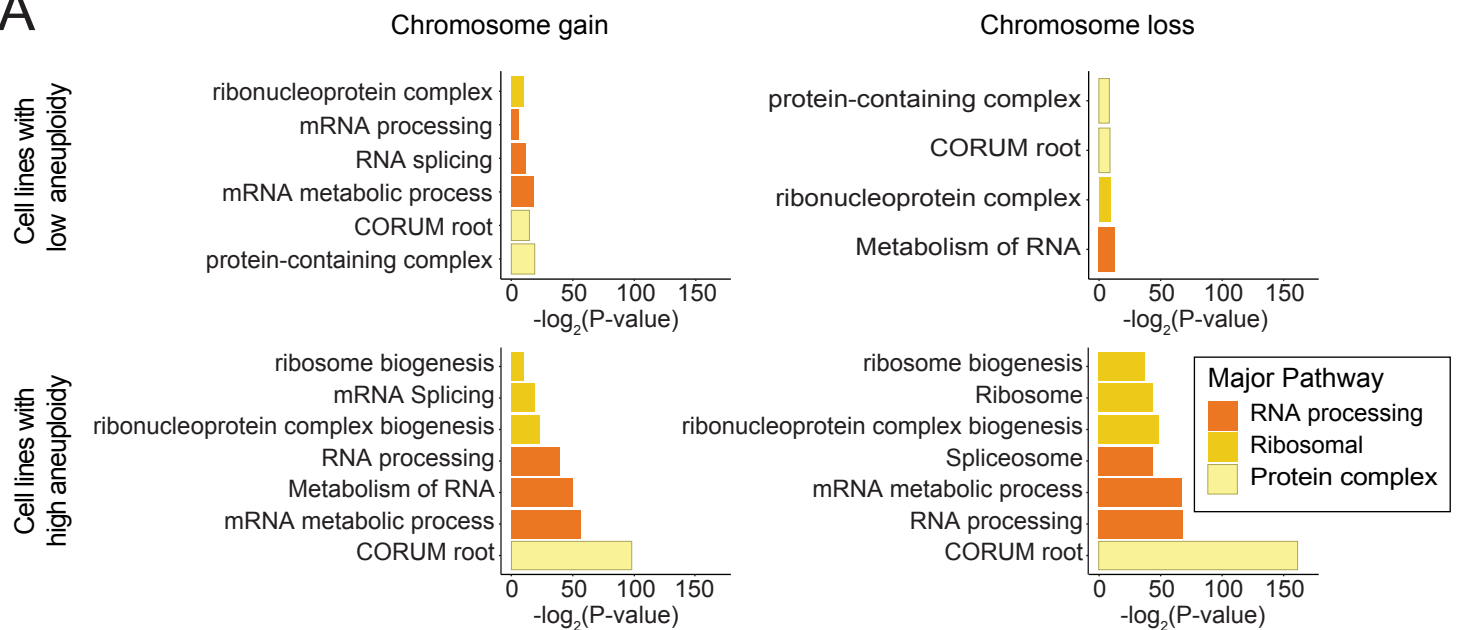

B

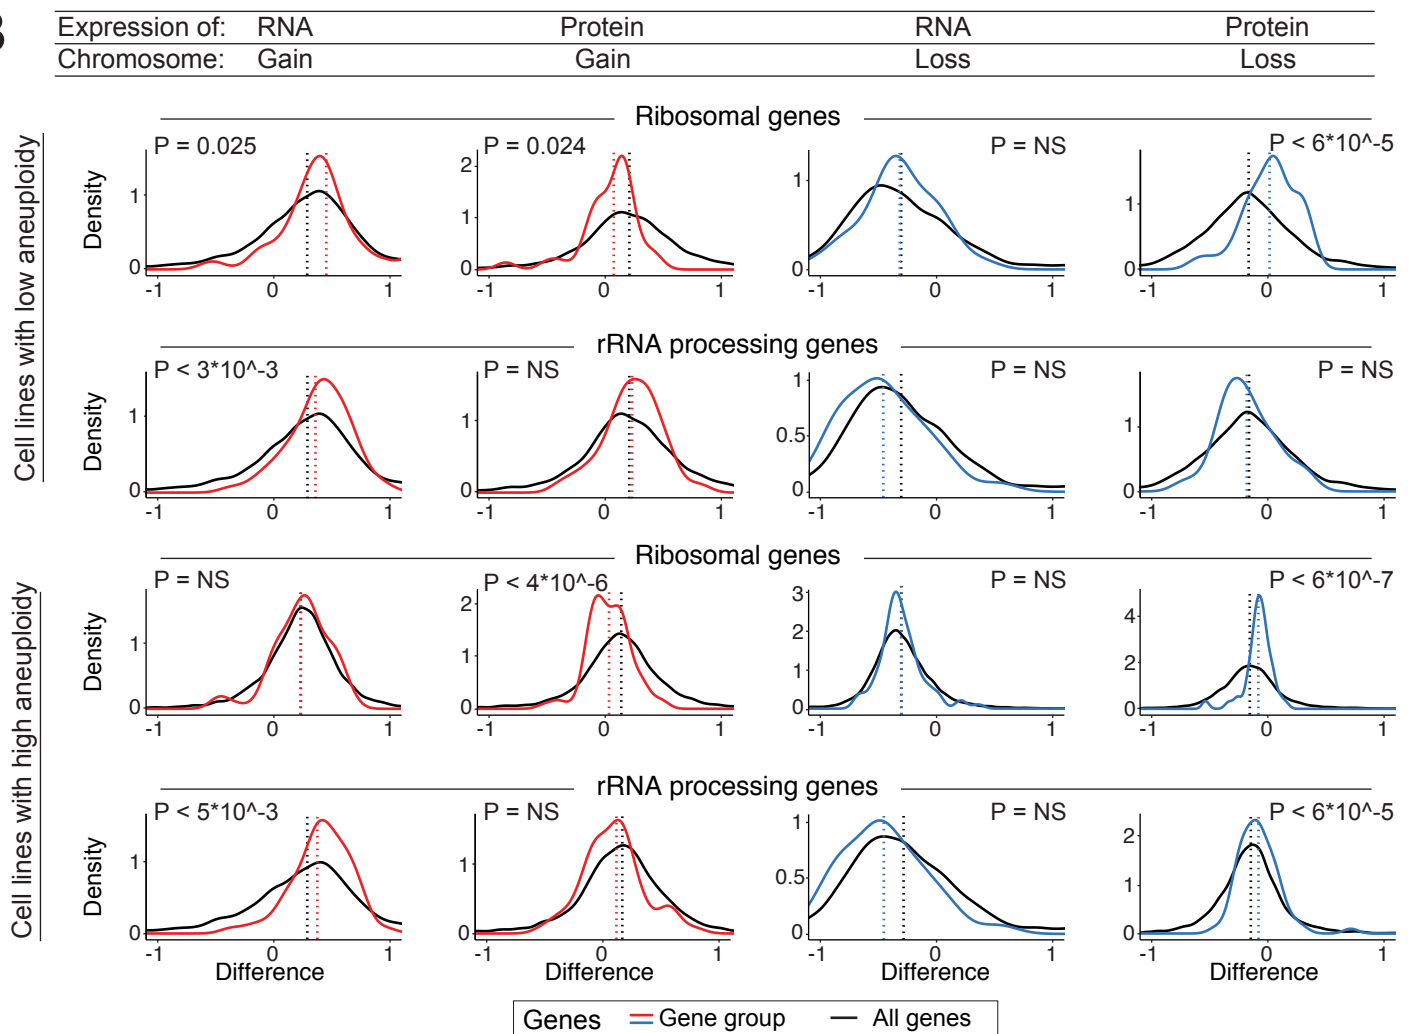

**Supplemental Figure S8. The ribosome and protein complex subunits are buffered in cell lines with low total aneuploidy.**

A) A bar graph displaying the GO terms that are enriched among buffered proteins within the quartile of cell lines with the lowest total aneuploidy scores (top) and the highest total aneuploidy scores (bottom). The complete list of GO terms is included in Supplemental Table S12.

B) Density graphs displaying the difference in RNA or protein expression per gene group upon chromosome gain (red) or loss (blue). The difference in expression for all other genes is shown in black. The mean difference per gene group is indicated by the dotted lines. P-values represent two-sided *t*-tests between the indicated gene groups and the background set of all other genes.
