# Supplementary material for: Extensive protein dosage compensation in aneuploid human cancers
Source: HighWire-hosted journal article supplement (doi:10.1101/gr.276378.121), 2022-06-14
Supplement: Supplemental_Sheltzer_R_Code.zip [file Aneuploidy.Score.perCell.xlsx]

## Sheet: Score2.aneuploid.cell_line.csv
DepMap_ID	ploidy	arm_Score	bp_Score	bp_ploidy_Score	Gene_Score	Gene_ploidy_Score
ACH-000001	3.52	27	2.59794e+09	6.49486e+08	12848	3650
ACH-000002	1.97	6	3.4695e+08	1.73475e+08	1590	807.107
ACH-000004	2.84	20	1409666660	4.69889e+08	9387	3305.28
ACH-000005	2.8	19	1.3222e+09	4.40734e+08	7629	2724.64
ACH-000006	1.98	7	4.15795e+08	2.07897e+08	2551	1288.38
ACH-000007	2.28	8	8.57083e+08	4.28541e+08	3631	1592.54
ACH-000008	2.63	23	1.68601e+09	5.62004e+08	9290	3532.32
ACH-000009	1.38	9	7.27519e+08	7.27519e+08	3845	2786.23
ACH-000012	2.74	21	1.35642e+09	4.52139e+08	8726	3184.67
ACH-000013	3.13	21	1.36067e+09	4.53558e+08	8767	2800.96
ACH-000014	3.07	14	902770465	3.00923e+08	4800	1563.52
ACH-000015	1.66	19	1.28563e+09	6.42815e+08	7862	4736.14
ACH-000016	2.19	8	5.7882e+08	2.8941e+08	3800	1735.16
ACH-000017	4.04	24	2.45512e+09	6.13781e+08	11022	2728.22
ACH-000018	3.65	24	1.96721e+09	4.91802e+08	10509	2879.18
ACH-000019	2.02	15	9.55353e+08	4.77676e+08	6317	3127.23
ACH-000020	1.04	3	115051836	115051836	470	451.923
ACH-000021	2.9	25	1.76799e+09	5.8933e+08	10081	3476.21
ACH-000022	3.24	23	1.62427e+09	5.41422e+08	9892	3053.09
ACH-000023	3.02	22	1.35486e+09	4.51618e+08	9500	3145.7
ACH-000024	3.35	22	1.65454e+09	5.51514e+08	9852	2940.9
ACH-000025	1.88	10	624786868	312393434	3412	1814.89
ACH-000027	1.86	9	8.14793e+08	4.07396e+08	4224	2270.97
ACH-000028	3.68	20	1.75282e+09	4.38205e+08	9030	2453.8
ACH-000030	3.33	19	1.40937e+09	4.6979e+08	6504	1953.15
ACH-000031	1.86	13	9.50363e+08	4.75181e+08	4858	2611.83
ACH-000032	2.03	4	2.9465e+08	1.47325e+08	1738	856.158
ACH-000035	2.08	13	8.91271e+08	4.45636e+08	5149	2475.48
ACH-000036	2.91	14	1.15391e+09	3.84638e+08	5592	1921.65
ACH-000037	6.44	34	2.92499e+09	4.87498e+08	16354	2539.44
ACH-000038	2	0	5.44147e+07	2.72074e+07	0	0
ACH-000039	2.01	8	7.10164e+08	3.55082e+08	2740	1363.18
ACH-000040	5.2	23	2.03347e+09	4.06694e+08	10043	1931.35
ACH-000041	3.03	24	1.68273e+09	5.6091e+08	11153	3680.86
ACH-000042	3.52	22	2.28621e+09	5.71553e+08	10363	2944.03
ACH-000043	2	0	0	0	0	0
ACH-000044	1.99	8	5.42525e+08	2.71263e+08	3115	1565.33
ACH-000045	2.07	4	2.41385e+08	1.20692e+08	2010	971.014
ACH-000046	1.22	6	4.20373e+08	4.20373e+08	2650	2172.13
ACH-000047	2.75	22	1.61087e+09	5.36957e+08	10484	3812.36
ACH-000048	1.07	2	1.33802e+08	1.33802e+08	735	686.916
ACH-000050	2.06	12	7.91379e+08	3.95689e+08	5613	2724.76
ACH-000051	2	0	3.87884e+07	1.93942e+07	0	0
ACH-000052	2.01	3	3.02082e+08	1.51041e+08	1805	898.01
ACH-000053	1.96	7	4.45194e+08	2.22597e+08	3485	1778.06
ACH-000054	2.04	4	2.3355e+08	1.16775e+08	2159	1058.33
ACH-000055	2.04	7	4.76469e+08	2.38234e+08	3677	1802.45
ACH-000056	2.06	2	159345973	7.9673e+07	861	417.961
ACH-000058	1.71	18	1.20126e+09	6.0063e+08	7100	4152.05
ACH-000059	2.02	2	1.169e+08	5.84501e+07	719	355.941
ACH-000060	1.78	13	9.71381e+08	4.8569e+08	5139	2887.08
ACH-000061	2.04	5	5.10992e+08	2.55496e+08	1905	933.824
ACH-000062	2.48	8	8.39831e+08	4.19915e+08	5280	2129.03
ACH-000063	2	0	0	0	0	0
ACH-000065	2.1	4	296829281	1.48415e+08	2169	1032.86
ACH-000066	3.47	20	1.69234e+09	5.64114e+08	7653	2205.48
ACH-000067	1.98	4	3.01483e+08	1.50741e+08	1567	791.414
ACH-000068	1.84	11	8.82571e+08	4.41285e+08	4840	2630.43
ACH-000070	2.03	3	3.42184e+08	1.71092e+08	1574	775.369
ACH-000071	2	0	1.09447e+07	5.47236e+06	0	0
ACH-000072	2.28	15	1.13241e+09	5.66207e+08	6844	3001.75
ACH-000073	1.92	7	4.23438e+08	2.11719e+08	2562	1334.38
ACH-000074	1.36	9	686237464	686237464	4914	3613.24
ACH-000075	1.94	6	3.87982e+08	1.93991e+08	2711	1397.42
ACH-000076	1.18	4	2.91761e+08	2.91761e+08	1972	1671.19
ACH-000077	2.03	1	1.46068e+08	7.30339e+07	458	225.616
ACH-000078	2.16	3	3.26988e+08	1.63494e+08	1645	761.574
ACH-000079	2	0	0	0	0	0
ACH-000080	2	0	0	0	0	0
ACH-000081	2.07	5	3.79493e+08	1.89747e+08	1591	768.599
ACH-000082	2.38	11	7.13164e+08	3.56582e+08	3737	1570.17
ACH-000083	2	0	0	0	0	0
ACH-000085	2.73	25	1.70129e+09	5.67096e+08	10314	3778.02
ACH-000086	1.1	4	2.0757e+08	2.0757e+08	1525	1386.36
ACH-000087	2.27	9	7.6923e+08	3.84615e+08	5573	2455.07
ACH-000088	2	0	0	0	0	0
ACH-000090	3.09	29	2.11751e+09	7.05836e+08	12508	4047.9
ACH-000091	1.94	4	2.0448e+08	1.0224e+08	1195	615.979
ACH-000092	1.7	14	1.11982e+09	5.59912e+08	6105	3591.18
ACH-000093	3.67	16	1.33291e+09	3.33229e+08	7775	2118.53
ACH-000094	2.61	27	1.76978e+09	5.89928e+08	11440	4383.14
ACH-000095	2.19	9	605024742	302512371	3970	1812.79
ACH-000096	2	0	0	0	0	0
ACH-000097	3.3	15	1.31281e+09	4.37602e+08	6266	1898.79
ACH-000098	2.88	22	1.57672e+09	5.25573e+08	9204	3195.83
ACH-000099	1.99	4	2.57024e+08	1.28512e+08	2617	1315.08
ACH-000100	3.34	23	1.39938e+09	4.6646e+08	10365	3103.29
ACH-000101	2.04	2	145138636	72569318	649	318.137
ACH-000102	1.38	9	6.83518e+08	6.83518e+08	3919	2839.86
ACH-000103	2.57	26	1.91003e+09	6.36676e+08	11204	4359.53
ACH-000104	1.96	2	1.79083e+08	8.95417e+07	1090	556.122
ACH-000105	2.11	6	4.04656e+08	2.02328e+08	2607	1235.55
ACH-000106	2.03	2	1.85495e+08	9.27475e+07	796	392.118
ACH-000107	1.79	17	1.0499e+09	5.24952e+08	8159	4558.1
ACH-000108	2.78	25	1.65315e+09	5.51049e+08	10820	3892.09
ACH-000109	6.75	21	3.21089e+09	4.58698e+08	9624	1425.78
ACH-000110	2.18	15	1.22703e+09	6.13515e+08	5121	2349.08
ACH-000111	1.4	13	8.41822e+08	8.41822e+08	5115	3653.57
ACH-000112	3.55	23	1.75135e+09	4.37837e+08	11703	3296.62
ACH-000113	2.15	5	4.13624e+08	2.06812e+08	2584	1201.86
ACH-000114	3.17	20	1.43506e+09	4.78355e+08	8679	2737.85
ACH-000115	3.38	17	1.17761e+09	3.92537e+08	7956	2353.85
ACH-000116	2.46	15	1.27049e+09	6.35246e+08	6915	2810.98
ACH-000117	1.8	22	1.27523e+09	6.37614e+08	9118	5065.56
ACH-000118	1.87	13	8.55452e+08	4.27726e+08	5615	3002.67
ACH-000119	2	0	0	0	0	0
ACH-000120	2.04	4	4.32658e+08	2.16329e+08	3215	1575.98
ACH-000121	1.9	13	7.16026e+08	3.58013e+08	4736	2492.63
ACH-000122	1.85	10	6.18226e+08	3.09113e+08	3387	1830.81
ACH-000123	2	0	0	0	0	0
ACH-000124	2.04	3	2.74744e+08	1.37372e+08	1195	585.784
ACH-000125	2	0	0	0	0	0
ACH-000126	2.65	28	2.33047e+09	7.76822e+08	12937	4881.89
ACH-000127	2.96	16	1.25055e+09	4.1685e+08	6846	2312.84
ACH-000128	4.33	19	2.01386e+09	5.03465e+08	9605	2218.24
ACH-000129	2.04	8	5.26543e+08	2.63272e+08	2816	1380.39
ACH-000130	2.05	3	2.38763e+08	1.19382e+08	990	482.927
ACH-000131	2	0	0	0	0	0
ACH-000132	1.86	16	9.25807e+08	4.62903e+08	5167	2777.96
ACH-000133	1.96	13	8.40211e+08	4.20106e+08	5345	2727.04
ACH-000134	2	0	1.21347e+07	6.06736e+06	0	0
ACH-000135	2	0	0	0	0	0
ACH-000136	2.12	6	4.75383e+08	2.37692e+08	4343	2048.58
ACH-000137	2.31	9	9.7328e+08	4.8664e+08	4402	1905.63
ACH-000138	1.76	12	7.85988e+08	3.92994e+08	4067	2310.8
ACH-000139	3.32	20	1.3651e+09	4.55034e+08	7752	2334.94
ACH-000140	2.13	8	6.11523e+08	3.05762e+08	3356	1575.59
ACH-000141	3.12	23	1.67325e+09	5.57751e+08	9880	3166.67
ACH-000142	3.01	21	1383704773	4.61235e+08	7760	2578.07
ACH-000144	2.74	22	1.55253e+09	5.1751e+08	8003	2920.8
ACH-000145	1.88	10	6.0006e+08	3.0003e+08	3698	1967.02
ACH-000146	2.13	11	6.95356e+08	3.47678e+08	4268	2003.76
ACH-000147	2.89	29	2.21967e+09	7.39891e+08	13986	4839.45
ACH-000148	2.65	23	1.8291e+09	6.09699e+08	10328	3897.36
ACH-000149	2.08	2	1.78077e+08	8.90385e+07	861	413.942
ACH-000150	1.52	23	1.76818e+09	8.8409e+08	9516	6260.53
ACH-000151	2.33	10	7.80171e+08	3.90085e+08	4476	1921.03
ACH-000152	4.06	25	2.24816e+09	5.62041e+08	10500	2586.21
ACH-000153	4.67	30	3.33816e+09	6.67632e+08	13127	2810.92
ACH-000154	2	0	0	0	0	0
ACH-000155	2.68	20	1.70502e+09	5.68342e+08	9345	3486.94
ACH-000156	1.99	2	2.27595e+08	1.13798e+08	735	369.347
ACH-000157	2.05	5	4.30798e+08	2.15399e+08	1844	899.512
ACH-000158	3.04	18	1.52813e+09	5.09375e+08	7787	2561.51
ACH-000159	1.64	16	1.11848e+09	5.59239e+08	6137	3742.07
ACH-000161	1.76	11	8.03785e+08	4.01893e+08	4472	2540.91
ACH-000162	2.04	3	2.44975e+08	1.22488e+08	1713	839.706
ACH-000163	3.5	21	2.00898e+09	5.02246e+08	10037	2867.71
ACH-000164	2.82	23	1.55347e+09	5.17822e+08	10432	3699.29
ACH-000165	2	0	3.20629e+07	1.60315e+07	0	0
ACH-000166	2.13	7	3.71945e+08	1.85972e+08	2241	1052.11
ACH-000167	2.1	4	278413945	1.39207e+08	1641	781.429
ACH-000168	2.09	7	6.02485e+08	3.01243e+08	2653	1269.38
ACH-000169	2.26	15	1.29962e+09	6.4981e+08	7844	3470.8
ACH-000171	1.91	10	9.89668e+08	4.94834e+08	4733	2478.01
ACH-000173	2	8	5.19319e+08	2.59659e+08	2135	1067.5
ACH-000174	1.6	20	1.50172e+09	7.50858e+08	9036	5647.5
ACH-000175	2	0	0	0	0	0
ACH-000176	2.16	7	8.63933e+08	4.31967e+08	3072	1422.22
ACH-000177	3.24	26	2.21479e+09	7.38264e+08	11100	3425.93
ACH-000178	2.51	24	1.87534e+09	6.25113e+08	10306	4105.98
ACH-000179	3.1	19	1.41804e+09	4.72679e+08	7981	2574.52
ACH-000180	2	0	8.67554e+06	4.33777e+06	0	0
ACH-000181	3.34	19	1.27367e+09	4.24557e+08	7212	2159.28
ACH-000183	2.16	8	7.38521e+08	3.6926e+08	4124	1909.26
ACH-000184	2	0	0	0	0	0
ACH-000185	2	0	0	0	0	0
ACH-000186	1.53	27	1.90344e+09	9.51718e+08	13159	8600.65
ACH-000187	3.45	24	2.10597e+09	7.01991e+08	9729	2820
ACH-000188	2.01	12	8.37989e+08	4.18995e+08	4357	2167.66
ACH-000189	3.42	30	2.23181e+09	7.43937e+08	12469	3645.91
ACH-000190	2.49	16	1.194e+09	5.97002e+08	7042	2828.11
ACH-000191	4.63	30	2.79025e+09	5.5805e+08	13712	2961.56
ACH-000192	2.54	28	2.13577e+09	7.11922e+08	12805	5041.34
ACH-000193	2.99	20	1.61836e+09	5.39452e+08	9647	3226.42
ACH-000194	2	0	0	0	0	0
ACH-000195	1.97	7	6.26978e+08	3.13489e+08	3185	1616.75
ACH-000196	2.46	15	1.14103e+09	5.70516e+08	6180	2512.2
ACH-000198	2.19	9	6.09546e+08	3.04773e+08	4272	1950.68
ACH-000200	2.23	8	6.6168e+08	3.3084e+08	2525	1132.29
ACH-000201	2	0	1.10079e+08	5.50393e+07	0	0
ACH-000202	2.42	13	9.50493e+08	4.75246e+08	5633	2327.69
ACH-000203	2.02	4	2.64672e+08	1.32336e+08	2754	1363.37
ACH-000204	1.92	7	7.32321e+08	3.66161e+08	3939	2051.56
ACH-000205	3.46	21	1.73449e+09	5.78163e+08	8864	2561.85
ACH-000207	3.02	23	1.63496e+09	5.44987e+08	9856	3263.58
ACH-000208	1.92	6	4.46313e+08	2.23157e+08	2062	1073.96
ACH-000209	2.8	20	1.77112e+09	5.90372e+08	8895	3176.79
ACH-000210	2.1	2	2.76784e+08	1.38392e+08	463	220.476
ACH-000211	2.43	18	1.34698e+09	6.73491e+08	8801	3621.81
ACH-000212	6.94	21	2.08347e+09	2.97639e+08	9247	1332.42
ACH-000213	3.25	23	1.69601e+09	5.65337e+08	9871	3037.23
ACH-000214	2	0	0	0	0	0
ACH-000215	3.5	30	2.58014e+09	6.45035e+08	14188	4053.71
ACH-000216	3.16	22	1.58543e+09	5.28476e+08	8909	2819.3
ACH-000217	1.72	18	1.09383e+09	5.46916e+08	7695	4473.84
ACH-000218	4.03	23	1.96394e+09	4.90985e+08	10701	2655.33
ACH-000219	2.76	16	1.25401e+09	4.18002e+08	6773	2453.99
ACH-000220	3.15	15	1.31119e+09	4.37062e+08	6036	1916.19
ACH-000221	2.69	22	1.70154e+09	5.67178e+08	9110	3386.62
ACH-000222	2.54	25	1.90816e+09	6.36053e+08	12033	4737.4
ACH-000223	4.06	23	2.55408e+09	6.38519e+08	9589	2361.82
ACH-000224	2	0	0	0	0	0
ACH-000225	2.27	13	8.75146e+08	4.37573e+08	5621	2476.21
ACH-000226	2.2	5	4.37432e+08	2.18716e+08	2512	1141.82
ACH-000227	1.97	4	2.62437e+08	1.31219e+08	2724	1382.74
ACH-000228	2.17	15	1.09699e+09	5.48494e+08	5983	2757.14
ACH-000229	2	0	630463	315231	0	0
ACH-000230	2	0	0	0	0	0
ACH-000231	3.08	22	1.86532e+09	6.21772e+08	11016	3576.62
ACH-000232	2.87	17	1.21707e+09	4.05691e+08	6502	2265.51
ACH-000233	1.79	17	9.48201e+08	4.74101e+08	7275	4064.25
ACH-000234	1.43	12	5.6463e+08	5.6463e+08	5346	3738.46
ACH-000235	2.79	18	1.26035e+09	4.20117e+08	7575	2715.05
ACH-000236	3.12	18	1.53733e+09	5.12444e+08	7889	2528.53
ACH-000237	2.7	23	1.84712e+09	6.15706e+08	10200	3777.78
ACH-000238	3.12	21	1.84148e+09	6.13827e+08	8918	2858.33
ACH-000239	2.9	28	2.3558e+09	7.85268e+08	11823	4076.9
ACH-000240	2	0	0	0	0	0
ACH-000241	2.07	4	4.52021e+08	2.26011e+08	1863	900
ACH-000242	3.8	19	1.41367e+09	3.53418e+08	8417	2215
ACH-000243	3.03	25	1.95993e+09	6.53311e+08	10615	3503.3
ACH-000244	1.91	8	610211312	305105656	2933	1535.6
ACH-000245	2.14	5	4.14107e+08	2.07053e+08	2084	973.832
ACH-000247	2.35	10	9.43928e+08	4.71964e+08	4326	1840.85
ACH-000248	3.75	31	2.89953e+09	7.24881e+08	13527	3607.2
ACH-000249	2.02	9	6.7038e+08	3.3519e+08	3139	1553.96
ACH-000250	1.91	11	8.6623e+08	4.33115e+08	4336	2270.16
ACH-000252	3.11	16	1.14179e+09	3.80598e+08	6099	1961.09
ACH-000254	3.19	21	1.44327e+09	4.8109e+08	8775	2750.78
ACH-000255	2.6	25	1.80802e+09	6.02674e+08	10975	4221.15
ACH-000256	3.96	27	2.30192e+09	5.7548e+08	12321	3111.36
ACH-000257	1.78	11	1.15011e+09	5.75054e+08	4962	2787.64
ACH-000258	2.02	4	5.57929e+08	2.78964e+08	1554	769.307
ACH-000259	2.08	10	8.39106e+08	4.19553e+08	4745	2281.25
ACH-000260	2.03	10	7.69874e+08	3.84937e+08	5488	2703.45
ACH-000261	2.37	10	8.4638e+08	4.2319e+08	3330	1405.06
ACH-000262	3.01	22	1.54023e+09	5.13411e+08	9461	3143.19
ACH-000263	1.97	7	4.17496e+08	2.08748e+08	2538	1288.32
ACH-000264	2.71	20	1.42643e+09	4.75477e+08	8688	3205.9
ACH-000265	3.19	17	1.23535e+09	4.11785e+08	6988	2190.6
ACH-000266	3.01	18	1.24512e+09	4.15039e+08	8565	2845.51
ACH-000267	1.99	10	4.79544e+08	2.39772e+08	3122	1568.84
ACH-000268	3.24	18	1.63911e+09	5.4637e+08	8682	2679.63
ACH-000269	1.9	6	3.17027e+08	1.58513e+08	1806	950.526
ACH-000270	2.88	16	9.99802e+08	3.33267e+08	5622	1952.08
ACH-000271	2.04	3	2.15692e+08	1.07846e+08	1112	545.098
ACH-000272	1.88	8	6.40611e+08	3.20305e+08	3510	1867.02
ACH-000274	2.14	10	8.85614e+08	4.42807e+08	2927	1367.76
ACH-000276	1.61	25	1.60114e+09	8.00572e+08	11247	6985.71
ACH-000277	2.07	10	6.51384e+08	3.25692e+08	4429	2139.61
ACH-000278	1.82	17	1.06839e+09	5.34195e+08	6505	3574.18
ACH-000279	3.3	20	1.61842e+09	5.39474e+08	8482	2570.3
ACH-000280	3.11	20	1.75485e+09	5.84951e+08	9592	3084.24
ACH-000281	1.68	16	1.08042e+09	5.40209e+08	7107	4230.36
ACH-000282	2.82	20	1.27246e+09	4.24153e+08	8332	2954.61
ACH-000283	2.79	24	1555241466	518413822	8806	3156.27
ACH-000284	2	0	0	0	0	0
ACH-000285	2.33	14	1.03909e+09	5.19543e+08	5116	2195.71
ACH-000287	1.98	1	1.22127e+08	6.10635e+07	821	414.646
ACH-000288	1.34	11	6.61661e+08	6.61661e+08	3461	2582.84
ACH-000289	2.1	6	6.08234e+08	3.04117e+08	2494	1187.62
ACH-000290	2.04	10	7.7445e+08	3.87225e+08	3356	1645.1
ACH-000291	1.93	13	7.99069e+08	3.99534e+08	5127	2656.48
ACH-000292	2.59	24	1.74717e+09	5.82389e+08	9946	3840.15
ACH-000293	2.7	25	1.69683e+09	5.65611e+08	10754	3982.96
ACH-000294	1.62	18	1.39081e+09	6.95404e+08	8825	5447.53
ACH-000295	1.93	15	1.04862e+09	5.2431e+08	7630	3953.37
ACH-000296	2.85	17	1.47309e+09	4.9103e+08	6703	2351.93
ACH-000297	2.93	22	1.91822e+09	6.39408e+08	9007	3074.06
ACH-000298	1.9	13	9.04849e+08	4.52424e+08	4429	2331.05
ACH-000300	2.46	16	1.14488e+09	5.72438e+08	6592	2679.67
ACH-000301	3.11	18	1.55743e+09	5.19144e+08	8001	2572.67
ACH-000302	3.9	28	2.15467e+09	5.38667e+08	12577	3224.87
ACH-000303	4.22	19	1.87717e+09	4.69294e+08	8323	1972.27
ACH-000304	2.03	5	4.14596e+08	2.07298e+08	1772	872.906
ACH-000305	3.66	25	2.13725e+09	5.34313e+08	11379	3109.02
ACH-000306	2	0	0	0	0	0
ACH-000307	1.72	17	1.09733e+09	5.48667e+08	6543	3804.07
ACH-000308	2.88	21	1.69336e+09	5.64455e+08	8129	2822.57
ACH-000309	4	28	2.77652e+09	6.94129e+08	12400	3100
ACH-000310	2.21	9	8.49007e+08	4.24503e+08	5564	2517.65
ACH-000311	2.49	20	1.39685e+09	6.98423e+08	8716	3500.4
ACH-000312	1.96	7	5.14344e+08	2.57172e+08	3850	1964.29
ACH-000313	1.99	5	5.20071e+08	2.60036e+08	2726	1369.85
ACH-000315	2.07	1	1.35059e+08	6.75297e+07	582	281.159
ACH-000316	1.93	7	3.83381e+08	1.9169e+08	3423	1773.58
ACH-000317	1.89	11	1.09674e+09	5.48368e+08	5359	2835.45
ACH-000318	2.78	29	2.44103e+09	8.13678e+08	13449	4837.77
ACH-000319	2.33	12	1.03125e+09	5.15626e+08	6259	2686.27
ACH-000320	2.85	23	1.83283e+09	6.10943e+08	10532	3695.44
ACH-000321	2.28	9	6.3694e+08	3.1847e+08	5040	2210.53
ACH-000322	2.91	17	1.22035e+09	4.06783e+08	6692	2299.66
ACH-000323	1.33	10	7.45529e+08	7.45529e+08	4714	3544.36
ACH-000324	2.82	27	1.92986e+09	6.43288e+08	12130	4301.42
ACH-000325	3.27	13	1.04322e+09	3.47739e+08	4209	1287.16
ACH-000326	1.95	6	4.72413e+08	2.36206e+08	2270	1164.1
ACH-000327	2.73	19	1.72142e+09	5.73807e+08	8738	3200.73
ACH-000329	2.01	4	2.75256e+08	1.37628e+08	1408	700.498
ACH-000330	2.93	26	1.86542e+09	6.21807e+08	11858	4047.1
ACH-000331	1.89	7	5.43043e+08	2.71521e+08	2700	1428.57
ACH-000332	3.2	26	1.71114e+09	5.70379e+08	11765	3676.56
ACH-000333	2.05	11	595021729	2.97511e+08	3743	1825.85
ACH-000334	3.13	22	1.40608e+09	4.68693e+08	8714	2784.03
ACH-000335	1.93	7	3.49875e+08	1.74938e+08	4077	2112.44
ACH-000336	2.15	4	4.35541e+08	2.17771e+08	1720	800
ACH-000338	3.44	20	1.75803e+09	5.8601e+08	8092	2352.33
ACH-000340	2	0	8.00956e+06	4.00478e+06	0	0
ACH-000341	2.09	7	5.46435e+08	2.73218e+08	3727	1783.25
ACH-000342	1.92	13	936048137	4.68024e+08	4568	2379.17
ACH-000343	2.42	18	1.51302e+09	7.56509e+08	8570	3541.32
ACH-000344	1.5	25	1.84e+09	9.19998e+08	11182	7454.67
ACH-000345	1.99	2	2.15851e+08	1.07926e+08	1504	755.779
ACH-000346	2.07	3	2.10227e+08	1.05114e+08	1201	580.193
ACH-000347	4.13	26	2.27256e+09	5.6814e+08	10900	2639.23
ACH-000348	2.53	30	1.91087e+09	6.36958e+08	13358	5279.84
ACH-000349	1.75	18	1.43608e+09	7.18042e+08	7666	4380.57
ACH-000350	2.4	17	1.62641e+09	8.13205e+08	8427	3511.25
ACH-000351	3.15	19	1.28929e+09	4.29764e+08	7913	2512.06
ACH-000352	1.92	15	1.18006e+09	5.90031e+08	5680	2958.33
ACH-000353	2.77	28	2.16595e+09	7.21982e+08	12697	4583.75
ACH-000354	2.91	25	1.81354e+09	6.04514e+08	9450	3247.42
ACH-000355	2.7	18	1.41002e+09	4.70005e+08	7578	2806.67
ACH-000356	1.85	17	9.89161e+08	4.9458e+08	5797	3133.51
ACH-000357	1.86	12	8.83902e+08	4.41951e+08	5623	3023.12
ACH-000358	1.64	16	1.27955e+09	6.39775e+08	6558	3998.78
ACH-000359	3.22	21	1.57998e+09	5.26661e+08	9815	3048.14
ACH-000360	2.31	6	8.28294e+08	4.14147e+08	2693	1165.8
ACH-000361	2.89	19	1.18241e+09	3.94136e+08	7778	2691.35
ACH-000362	2.27	8	774358051	3.87179e+08	3492	1538.33
ACH-000363	2	9	6.71565e+08	3.35783e+08	3139	1569.5
ACH-000364	3.09	16	9.46127e+08	3.15376e+08	5722	1851.78
ACH-000365	2.19	9	5.80518e+08	2.90259e+08	3373	1540.18
ACH-000366	2.04	7	3.27594e+08	1.63797e+08	3057	1498.53
ACH-000367	1.96	5	2.87588e+08	1.43794e+08	1660	846.939
ACH-000368	2	6	4.58657e+08	2.29328e+08	2005	1002.5
ACH-000369	1.83	8	6.85568e+08	3.42784e+08	2666	1456.83
ACH-000370	3.35	26	2.40715e+09	8.02384e+08	11194	3341.49
ACH-000371	2.11	7	3.59795e+08	1.79897e+08	3122	1479.62
ACH-000372	1.97	6	2.08356e+08	1.04178e+08	1929	979.188
ACH-000373	1.97	6	4.42407e+08	2.21204e+08	3562	1808.12
ACH-000374	3.69	30	3.08343e+09	7.70857e+08	12778	3462.87
ACH-000375	2.09	2	3.43095e+08	1.71547e+08	1186	567.464
ACH-000376	3.13	14	1.06046e+09	3.53487e+08	6534	2087.54
ACH-000377	2.89	24	1.59763e+09	5.32543e+08	9693	3353.98
ACH-000378	3.31	16	1.2382e+09	4.12735e+08	8990	2716.01
ACH-000379	2.51	29	2.31523e+09	7.71745e+08	13650	5438.25
ACH-000380	1.87	11	8.81402e+08	4.40701e+08	5200	2780.75
ACH-000381	2.85	20	1.51769e+09	5.05897e+08	7174	2517.19
ACH-000382	1.78	12	9.38156e+08	4.69078e+08	5302	2978.65
ACH-000383	2.54	23	1.50003e+09	5.00009e+08	9404	3702.36
ACH-000384	1.95	7	3.96213e+08	1.98106e+08	2953	1514.36
ACH-000386	2.02	5	5.44131e+08	2.72066e+08	2467	1221.29
ACH-000387	2.45	10	7.96941e+08	3.98471e+08	5091	2077.96
ACH-000388	2.18	5	3.79012e+08	1.89506e+08	1266	580.734
ACH-000389	3.18	16	1.13727e+09	3.7909e+08	6287	1977.04
ACH-000390	1.82	22	1.58171e+09	7.90856e+08	8782	4825.27
ACH-000391	2.24	10	1.02783e+09	5.13914e+08	5651	2522.77
ACH-000392	2.99	22	2.01426e+09	6.7142e+08	10880	3638.8
ACH-000393	2.7	18	1.46455e+09	4.88184e+08	7204	2668.15
ACH-000394	3.09	22	2.04492e+09	6.81638e+08	9704	3140.45
ACH-000395	2.6	22	1.52807e+09	5.09357e+08	9173	3528.08
ACH-000396	1.95	12	8.13535e+08	4.06768e+08	5559	2850.77
ACH-000397	3.4	29	2051419029	683806343	12047	3543.24
ACH-000398	2.16	8	7.03068e+08	3.51534e+08	3165	1465.28
ACH-000399	1.79	11	8.82936e+08	4.41468e+08	4264	2382.12
ACH-000400	3.68	30	2.50525e+09	6.26312e+08	13294	3612.5
ACH-000401	2.81	26	1.83322e+09	6.11073e+08	11906	4237.01
ACH-000402	2.05	2	159345973	7.9673e+07	861	420
ACH-000403	3.1	23	2.03673e+09	6.78911e+08	10462	3374.84
ACH-000404	1.93	12	1.11703e+09	5.58516e+08	5853	3032.64
ACH-000405	2	5	2.99098e+08	1.49549e+08	1753	876.5
ACH-000406	2.6	22	1.57463e+09	5.24876e+08	9739	3745.77
ACH-000407	5.09	30	2.6875e+09	5.375e+08	13349	2622.59
ACH-000408	2.98	25	1.70964e+09	5.69881e+08	10933	3668.79
ACH-000409	2.89	32	2.43184e+09	8.10612e+08	14663	5073.7
ACH-000411	1.99	5	4.4494e+08	2.2247e+08	3219	1617.59
ACH-000412	2.09	12	7.28196e+08	3.64098e+08	3975	1901.91
ACH-000413	2	0	0	0	0	0
ACH-000414	2.19	7	6.82121e+08	3.41061e+08	3822	1745.21
ACH-000415	2.97	20	1.52367e+09	5.0789e+08	6843	2304.04
ACH-000416	2.36	9	6.23591e+08	3.11796e+08	3408	1444.07
ACH-000417	2.52	28	2.17634e+09	7.25448e+08	12891	5115.48
ACH-000418	2.06	2	159345973	7.9673e+07	861	417.961
ACH-000419	1.88	12	1.00969e+09	5.04845e+08	5822	3096.81
ACH-000420	2.49	17	1.56905e+09	7.84525e+08	8492	3410.44
ACH-000421	1.89	13	9.20842e+08	4.60421e+08	5617	2971.96
ACH-000422	3.04	23	1.66355e+09	5.54516e+08	9389	3088.49
ACH-000423	4.05	20	2.04843e+09	5.12106e+08	8745	2159.26
ACH-000424	2.05	3	1.88631e+08	9.43155e+07	906	441.951
ACH-000425	1.81	8	6.07709e+08	3.03854e+08	3555	1964.09
ACH-000426	1.86	6	4.94181e+08	2.4709e+08	2605	1400.54
ACH-000427	1.86	15	8.90203e+08	4.45101e+08	6734	3620.43
ACH-000429	1.99	12	9.58636e+08	4.79318e+08	5518	2772.86
ACH-000430	2.5	17	1.62064e+09	8.10321e+08	8545	3418
ACH-000431	2.47	17	1.45605e+09	7.28024e+08	9380	3797.57
ACH-000432	2.14	3	5.46669e+08	2.73334e+08	1185	553.738
ACH-000433	3.28	23	1.96816e+09	6.56055e+08	10043	3061.89
ACH-000434	2.08	9	6.08726e+08	3.04363e+08	2829	1360.1
ACH-000435	1.9	9	8.45608e+08	4.22804e+08	4330	2278.95
ACH-000437	3.78	29	2.29183e+09	5.72957e+08	12740	3370.37
ACH-000438	2.35	11	8.91678e+08	4.45839e+08	5614	2388.94
ACH-000439	2.08	10	7.10749e+08	3.55375e+08	3973	1910.1
ACH-000440	2.07	0	1.15785e+08	5.78926e+07	0	0
ACH-000441	2.39	13	1.27999e+09	6.39995e+08	7038	2944.77
ACH-000442	2.78	20	1.40918e+09	4.69727e+08	8038	2891.37
ACH-000443	2.02	17	1.02818e+09	5.1409e+08	6811	3371.78
ACH-000444	2.71	24	2.05337e+09	6.84457e+08	10050	3708.49
ACH-000445	1.2	7	5.59562e+08	5.59562e+08	2839	2365.83
ACH-000446	2.31	12	1.02292e+09	5.11458e+08	4296	1859.74
ACH-000447	3.92	24	2.19e+09	5.47499e+08	10534	2687.24
ACH-000448	3.02	17	1.2592e+09	4.19734e+08	7882	2609.93
ACH-000449	1.93	2	2.28079e+08	1.14039e+08	691	358.031
ACH-000450	3.28	18	1.47373e+09	4.91245e+08	7592	2314.63
ACH-000451	2.68	29	2.0084e+09	6.69467e+08	11715	4371.27
ACH-000452	2.7	24	1.97164e+09	6.57213e+08	10465	3875.93
ACH-000453	1.91	11	1.04127e+09	5.20635e+08	5987	3134.55
ACH-000454	2.55	28	2.10408e+09	7.01359e+08	12984	5091.76
ACH-000456	3.2	18	1.45535e+09	4.85118e+08	8273	2585.31
ACH-000457	2.45	15	1.24677e+09	6.23387e+08	6672	2723.27
ACH-000458	1.38	11	7.76452e+08	7.76452e+08	4316	3127.54
ACH-000459	1.88	12	7.46641e+08	3.73321e+08	4580	2436.17
ACH-000460	2.9	27	1.89626e+09	6.32088e+08	11663	4021.72
ACH-000461	2.54	33	2.40334e+09	8.01114e+08	14320	5637.8
ACH-000462	1.97	1	43070468	21535234	205	104.061
ACH-000463	2.54	21	1.63571e+09	5.45238e+08	9603	3780.71
ACH-000464	1.87	10	6.68706e+08	3.34353e+08	4661	2492.51
ACH-000465	3.61	20	2.11117e+09	5.27793e+08	9017	2497.78
ACH-000466	2.24	15	1.14293e+09	5.71463e+08	5950	2656.25
ACH-000467	2.94	22	1.65182e+09	5.50605e+08	9024	3069.39
ACH-000468	2.25	10	9.42964e+08	4.71482e+08	3445	1531.11
ACH-000469	1.96	9	5.43845e+08	2.71922e+08	3821	1949.49
ACH-000470	3.45	21	2.18112e+09	7.27041e+08	8551	2478.55
ACH-000471	2.8	23	1.72423e+09	5.74742e+08	11159	3985.36
ACH-000472	2.65	26	2.04005e+09	6.80015e+08	13115	4949.06
ACH-000473	2.04	12	7.92752e+08	3.96376e+08	4075	1997.55
ACH-000475	2.94	18	1.30651e+09	4.35504e+08	7848	2669.39
ACH-000476	3.44	20	1.64335e+09	5.47782e+08	9825	2856.1
ACH-000477	1.95	6	6.35324e+08	3.17662e+08	3886	1992.82
ACH-000478	2.92	24	1.6708e+09	5.56932e+08	10514	3600.68
ACH-000479	1.96	6	4.49343e+08	2.24672e+08	2569	1310.71
ACH-000480	2.54	26	1.96499e+09	6.54997e+08	11907	4687.8
ACH-000481	2.91	24	1.66885e+09	5.56282e+08	11237	3861.51
ACH-000482	2.99	17	1.42407e+09	4.7469e+08	7202	2408.7
ACH-000483	3.32	20	1.47318e+09	4.91061e+08	7804	2350.6
ACH-000484	2.19	14	1.15069e+09	5.75343e+08	5772	2635.62
ACH-000485	3.72	29	2.2724e+09	5.68101e+08	12747	3426.61
ACH-000486	1.87	17	8.39725e+08	4.19862e+08	6724	3595.72
ACH-000487	1.92	8	5.92029e+08	2.96014e+08	3151	1641.15
ACH-000488	2.82	23	1.64113e+09	5.47044e+08	9493	3366.31
ACH-000489	2.76	24	1.72169e+09	5.73896e+08	10513	3809.06
ACH-000491	2.83	28	1.93883e+09	6.46278e+08	12139	4289.4
ACH-000492	1.99	0	4.68675e+06	2.34337e+06	0	0
ACH-000493	7.64	39	3.84266e+09	4.80332e+08	18043	2361.65
ACH-000495	2.44	18	1430395799	7.15198e+08	8440	3459.02
ACH-000496	2.28	16	8.57354e+08	4.28677e+08	6392	2803.51
ACH-000498	2.12	6	6.35894e+08	3.17947e+08	2397	1130.66
ACH-000499	3.06	20	1.17707e+09	3.92356e+08	7446	2433.33
ACH-000500	2.95	21	1.66902e+09	5.56341e+08	9167	3107.46
ACH-000501	2.66	26	2.16288e+09	7.20961e+08	11999	4510.9
ACH-000502	3.31	34	2.56839e+09	8.5613e+08	15272	4613.9
ACH-000503	2.98	21	1.77783e+09	5.92611e+08	9106	3055.7
ACH-000505	4.63	32	2.69442e+09	5.38885e+08	14135	3052.92
ACH-000506	3.08	20	1.54782e+09	5.1594e+08	8630	2801.95
ACH-000507	2.96	23	1.81822e+09	6.06074e+08	10201	3446.28
ACH-000508	1.92	13	9.94469e+08	4.97234e+08	5098	2655.21
ACH-000509	1.88	10	6.67364e+08	3.33682e+08	3549	1887.77
ACH-000510	2.62	26	1.71758e+09	5.72527e+08	11444	4367.94
ACH-000511	2.84	20	1.28971e+09	4.29905e+08	6950	2447.18
ACH-000513	1.94	8	6.84203e+08	3.42101e+08	4132	2129.9
ACH-000514	2.86	20	1.62444e+09	5.41481e+08	9729	3401.75
ACH-000515	2.65	21	1.7347e+09	5.78233e+08	9974	3763.77
ACH-000516	7.72	39	3.75376e+09	4.6922e+08	18043	2337.18
ACH-000517	2.87	24	2.08365e+09	6.94551e+08	9942	3464.11
ACH-000518	2.13	10	7.2929e+08	3.64645e+08	3408	1600
ACH-000519	1.99	5	4.78575e+08	2.39288e+08	1930	969.849
ACH-000520	2.6	27	1.87466e+09	6.24886e+08	11105	4271.15
ACH-000521	2.12	12	8.8741e+08	4.43705e+08	4078	1923.58
ACH-000522	3.61	24	2.00024e+09	5.00059e+08	10474	2901.39
ACH-000523	2.56	24	1.70932e+09	5.69773e+08	10534	4114.84
ACH-000524	2.8	29	2.25542e+09	7.51807e+08	13519	4828.21
ACH-000525	1.82	12	9.00092e+08	4.50046e+08	4550	2500
ACH-000526	1.99	2	1.52216e+08	7.61082e+07	1141	573.367
ACH-000527	2.88	23	1.66059e+09	5.53531e+08	9387	3259.38
ACH-000528	2.53	33	2.53551e+09	8.45171e+08	14343	5669.17
ACH-000529	2	0	0	0	0	0
ACH-000530	3	24	1.80275e+09	6.00915e+08	11191	3730.33
ACH-000532	2.8	25	1.8216e+09	6.07201e+08	11609	4146.07
ACH-000534	2.07	3	205238636	102619318	927	447.826
ACH-000535	2.52	23	1.63643e+09	5.45476e+08	9919	3936.11
ACH-000536	2.62	26	2.12849e+09	7.09495e+08	11889	4537.79
ACH-000537	2.24	15	9.87246e+08	4.93623e+08	6741	3009.38
ACH-000538	1.99	0	2.09523e+08	1.04761e+08	0	0
ACH-000539	2	0	6.21732e+07	3.10866e+07	0	0
ACH-000540	2	0	1.52331e+07	7.61655e+06	0	0
ACH-000541	1.9	12	8.28446e+08	4.14223e+08	4795	2523.68
ACH-000542	2.03	6	4.80535e+08	2.40267e+08	2433	1198.52
ACH-000543	1.83	20	1.54937e+09	7.74686e+08	9119	4983.06
ACH-000544	3.22	24	1.72221e+09	5.7407e+08	10048	3120.5
ACH-000545	2.07	5	3.0673e+08	1.53365e+08	1287	621.739
ACH-000546	3.73	28	2.31752e+09	5.7938e+08	11978	3211.26
ACH-000547	3.35	20	1.44623e+09	4.82075e+08	8432	2517.01
ACH-000548	2.85	20	1.65077e+09	5.50256e+08	8742	3067.37
ACH-000549	3.71	28	2.80739e+09	7.01848e+08	11442	3084.1
ACH-000550	1.49	12	7.9141e+08	7.9141e+08	5011	3363.09
ACH-000551	3.05	14	1.17735e+09	3.9245e+08	5822	1908.85
ACH-000552	3.12	18	1.16474e+09	3.88245e+08	7341	2352.88
ACH-000553	3.04	20	1.66352e+09	5.54507e+08	8459	2782.57
ACH-000554	3.21	30	2.56567e+09	8.55222e+08	13657	4254.52
ACH-000555	3.28	24	1.94707e+09	6.49022e+08	10358	3157.93
ACH-000557	2.23	8	6.79003e+08	3.39501e+08	3304	1481.61
ACH-000558	1.97	7	5.8446e+08	2.9223e+08	4338	2202.03
ACH-000559	3.07	18	1.25022e+09	4.16739e+08	7144	2327.04
ACH-000560	3.78	22	2.16324e+09	5.40809e+08	9187	2430.42
ACH-000561	3.89	27	2.54461e+09	6.36153e+08	11408	2932.65
ACH-000562	2.15	6	3.7225e+08	1.86125e+08	3486	1621.4
ACH-000563	3.03	25	1.78742e+09	5.95805e+08	9514	3139.93
ACH-000564	2.46	15	9.95585e+08	4.97793e+08	7117	2893.09
ACH-000565	3.33	18	1.3618e+09	4.53934e+08	8195	2460.96
ACH-000566	1.9	10	8.73563e+08	4.36781e+08	4087	2151.05
ACH-000567	2.11	2	1.93235e+08	9.66176e+07	861	408.057
ACH-000568	2.78	23	1.57081e+09	5.23602e+08	9819	3532.01
ACH-000569	3.31	19	1.26283e+09	4.20943e+08	8255	2493.96
ACH-000570	3.19	18	1.33971e+09	4.46569e+08	8561	2683.7
ACH-000571	2.84	15	8.87433e+08	2.95811e+08	5905	2079.23
ACH-000572	3.24	27	2.12125e+09	7.07082e+08	10940	3376.54
ACH-000573	1.67	20	1.39967e+09	6.99833e+08	8903	5331.14
ACH-000574	2.97	22	1.51044e+09	5.03482e+08	8330	2804.71
ACH-000575	3.78	18	1.75965e+09	4.39914e+08	7780	2058.2
ACH-000576	2.06	7	5.42045e+08	2.71023e+08	3650	1771.84
ACH-000577	2.82	23	1.67293e+09	5.57645e+08	9855	3494.68
ACH-000578	2.55	26	2.02511e+09	6.75038e+08	12516	4908.24
ACH-000579	8.3	39	4.07401e+09	5.09251e+08	18043	2173.86
ACH-000580	2.11	5	5.16871e+08	2.58435e+08	1590	753.555
ACH-000581	3.62	27	1.9212e+09	4.803e+08	10940	3022.1
ACH-000582	1.77	17	1.35332e+09	6.76659e+08	7115	4019.77
ACH-000583	2.08	2	1.46961e+08	7.34806e+07	937	450.481
ACH-000584	1.67	22	1.3818e+09	6.90901e+08	9167	5489.22
ACH-000585	3.19	26	2.04534e+09	6.81781e+08	12046	3776.18
ACH-000586	2.59	29	2.07496e+09	6.91653e+08	13075	5048.26
ACH-000587	2.9	21	1.64782e+09	5.49273e+08	7978	2751.03
ACH-000588	3.51	26	1.98901e+09	4.97253e+08	10850	3091.17
ACH-000589	2.89	21	1.58275e+09	5.27583e+08	9567	3310.38
ACH-000590	2.57	33	2.62886e+09	8.76286e+08	15587	6064.98
ACH-000591	4.03	21	1.73548e+09	4.33871e+08	9495	2356.08
ACH-000592	2.93	20	1.40287e+09	4.67623e+08	8302	2833.45
ACH-000593	3.17	22	1.93808e+09	6.46028e+08	8287	2614.2
ACH-000594	1.9	13	7.97277e+08	3.98639e+08	4847	2551.05
ACH-000595	3.81	24	1.8825e+09	4.70625e+08	10592	2780.05
ACH-000596	2.9	23	1.4187e+09	4.72899e+08	9396	3240
ACH-000598	1.93	13	9.65047e+08	4.82523e+08	5871	3041.97
ACH-000599	4.19	26	2.2781e+09	5.69525e+08	11695	2791.17
ACH-000600	1.83	19	1.3279e+09	6.63949e+08	7545	4122.95
ACH-000601	2.84	19	1.48003e+09	4.93342e+08	8352	2940.85
ACH-000602	2.02	0	5.43251e+07	2.71625e+07	0	0
ACH-000603	3.78	31	2.79638e+09	6.99095e+08	14038	3713.76
ACH-000604	1.99	15	9.35925e+08	4.67963e+08	5408	2717.59
ACH-000605	2.7	28	2.39174e+09	7.97248e+08	12293	4552.96
ACH-000606	2.06	16	1.29499e+09	6.47497e+08	6452	3132.04
ACH-000607	2.03	2	1.63581e+08	8.17906e+07	1359	669.458
ACH-000608	2.62	24	1.77533e+09	5.91775e+08	9522	3634.35
ACH-000609	2	6	4.85335e+08	2.42668e+08	1561	780.5
ACH-000610	2.52	23	1.7683e+09	5.89433e+08	10418	4134.13
ACH-000611	2.11	6	4.83974e+08	2.41987e+08	2858	1354.5
ACH-000612	2	0	0	0	0	0
ACH-000613	2.26	9	7.12639e+08	3.5632e+08	3534	1563.72
ACH-000614	3.2	11	9.71932e+08	3.23977e+08	3939	1230.94
ACH-000615	4.02	26	2.191e+09	5.47751e+08	12029	2992.29
ACH-000616	6.44	29	2.58934e+09	4.31556e+08	13530	2100.93
ACH-000617	2.99	26	1.92953e+09	6.43177e+08	10826	3620.74
ACH-000619	3.39	25	1.77962e+09	5.93206e+08	11377	3356.05
ACH-000620	4.15	25	1.95431e+09	4.88578e+08	11534	2779.28
ACH-000621	2.44	18	1.3446e+09	6.723e+08	6885	2821.72
ACH-000622	3.2	22	1.87944e+09	6.2648e+08	10554	3298.12
ACH-000623	3.32	23	1.64059e+09	5.46865e+08	9767	2941.87
ACH-000624	2.38	16	1.20433e+09	6.02166e+08	7551	3172.69
ACH-000625	2.83	20	1.66819e+09	5.56064e+08	9536	3369.61
ACH-000626	2.04	10	4.4939e+08	2.24695e+08	2799	1372.06
ACH-000627	2.38	11	9.0325e+08	4.51625e+08	3789	1592.02
ACH-000628	3.1	23	2.04287e+09	6.80957e+08	9771	3151.94
ACH-000630	3.43	24	1917827200	6.39276e+08	9862	2875.22
ACH-000631	1.9	7	3.42971e+08	1.71485e+08	3660	1926.32
ACH-000632	2.75	22	1.37285e+09	4.57616e+08	9046	3289.45
ACH-000633	7.7	39	3.83494e+09	4.79368e+08	18043	2343.25
ACH-000634	3.58	30	2.60838e+09	6.52095e+08	14030	3918.99
ACH-000635	3.12	27	2.07549e+09	6.91831e+08	12371	3965.06
ACH-000636	1.95	5	2.84921e+08	1.42461e+08	1469	753.333
ACH-000637	2.82	23	1.61473e+09	5.38244e+08	8488	3009.93
ACH-000638	2.73	20	1.40527e+09	4.68423e+08	7703	2821.61
ACH-000639	1.92	14	1.07012e+09	5.35062e+08	5630	2932.29
ACH-000640	3.54	26	2.84489e+09	7.11222e+08	13109	3703.11
ACH-000641	1.94	13	7.33748e+08	3.66874e+08	4559	2350
ACH-000643	4.85	33	3.2615e+09	6.523e+08	15114	3116.29
ACH-000644	3.22	19	1.47628e+09	4.92094e+08	8697	2700.93
ACH-000645	2.04	7	558800764	279400382	2605	1276.96
ACH-000646	3.83	26	2.24301e+09	5.60753e+08	11579	3023.24
ACH-000647	2.71	27	2.1742e+09	7.24735e+08	10785	3979.7
ACH-000648	3.94	22	2.16751e+09	5.41877e+08	10927	2773.35
ACH-000649	3.71	24	2.12237e+09	5.30594e+08	10445	2815.36
ACH-000650	1.76	13	9.19295e+08	4.59648e+08	6017	3418.75
ACH-000651	2.21	10	6.19022e+08	3.09511e+08	3593	1625.79
ACH-000652	3.8	21	1.54275e+09	3.85688e+08	8567	2254.47
ACH-000653	2.85	21	1.74847e+09	5.82823e+08	8642	3032.28
ACH-000654	2.02	1	4.81763e+07	2.40882e+07	251	124.257
ACH-000656	2.26	7	671645754	335822877	2376	1051.33
ACH-000657	2.01	2	3.66347e+08	1.83173e+08	1349	671.144
ACH-000659	1.89	9	5.27501e+08	2.63751e+08	3316	1754.5
ACH-000660	1.97	2	146198736	73099368	690	350.254
ACH-000661	2.53	24	1.78173e+09	5.9391e+08	11090	4383.4
ACH-000662	2.27	9	5.85003e+08	2.92501e+08	3826	1685.46
ACH-000663	3.43	22	1.35685e+09	4.52282e+08	9579	2792.71
ACH-000664	3.44	16	1.14807e+09	3.8269e+08	7313	2125.87
ACH-000665	2.64	23	1.57362e+09	5.2454e+08	9479	3590.53
ACH-000666	2.4	17	1.2181e+09	6.0905e+08	8238	3432.5
ACH-000667	7.74	39	3.44185e+09	4.30232e+08	18043	2331.14
ACH-000668	4.65	34	4.19637e+09	8.39273e+08	15339	3298.71
ACH-000669	2.72	25	1.80909e+09	6.03029e+08	10624	3905.88
ACH-000670	2.97	18	1.39329e+09	4.64431e+08	8415	2833.33
ACH-000671	2.01	14	1.04631e+09	5.23154e+08	6276	3122.39
ACH-000672	2.47	15	1.20195e+09	6.00975e+08	7991	3235.22
ACH-000673	2.79	25	1.66728e+09	5.5576e+08	10684	3829.39
ACH-000674	2.44	14	1.23835e+09	6.19175e+08	6918	2835.25
ACH-000675	2.63	25	1.71627e+09	5.7209e+08	10998	4181.75
ACH-000677	3.48	27	2.23321e+09	7.44403e+08	12563	3610.06
ACH-000678	3.19	22	1.85927e+09	6.19757e+08	8992	2818.81
ACH-000679	2.69	25	1.86544e+09	6.21813e+08	10865	4039.03
ACH-000680	2.95	22	1.98569e+09	6.61897e+08	9394	3184.41
ACH-000681	2.85	22	1.46902e+09	4.89672e+08	10487	3679.65
ACH-000683	2.72	26	1.97135e+09	6.57117e+08	11242	4133.09
ACH-000684	1.94	8	5.30467e+08	2.65234e+08	3267	1684.02
ACH-000685	2.13	10	6.74948e+08	3.37474e+08	4396	2063.85
ACH-000686	3.03	23	1.62034e+09	5.40115e+08	11732	3871.95
ACH-000687	2	0	4.13067e+06	2.06533e+06	0	0
ACH-000688	1.88	8	5.11352e+08	2.55676e+08	3263	1735.64
ACH-000689	3.69	23	2.32642e+09	5.81605e+08	11239	3045.8
ACH-000690	3.31	29	2.51201e+09	8.37338e+08	13736	4149.85
ACH-000691	2.76	30	2.53102e+09	8.43674e+08	13046	4726.81
ACH-000692	4.39	25	2.3222e+09	5.80551e+08	11113	2531.44
ACH-000693	2.69	27	2.19587e+09	7.31958e+08	12019	4468.03
ACH-000694	3.19	21	1.36859e+09	4.56198e+08	8813	2762.7
ACH-000695	1.95	9	6.27127e+08	3.13563e+08	3005	1541.03
ACH-000696	2.56	28	1.92279e+09	6.40929e+08	12137	4741.02
ACH-000697	2.1	3	2.41351e+08	1.20675e+08	1428	680
ACH-000698	2.85	25	2.22609e+09	7.42029e+08	11255	3949.12
ACH-000699	1.48	11	7.3071e+08	7.3071e+08	4979	3364.19
ACH-000701	1.76	15	9.80323e+08	4.90162e+08	5738	3260.23
ACH-000702	2.89	21	1.62693e+09	5.42311e+08	9367	3241.18
ACH-000703	3.56	21	2.45521e+09	6.13802e+08	8952	2514.61
ACH-000704	3.78	23	2.1462e+09	5.36549e+08	9431	2494.97
ACH-000705	7.51	39	5.1429e+09	6.42863e+08	18043	2402.53
ACH-000707	2.05	0	1.65203e+08	8.26015e+07	0	0
ACH-000708	1.85	13	8.27109e+08	4.13554e+08	4356	2354.59
ACH-000709	1.89	5	4.7013e+08	2.35065e+08	2056	1087.83
ACH-000710	2.79	22	1.61648e+09	5.38828e+08	8678	3110.39
ACH-000711	2.62	25	2.02663e+09	6.75544e+08	11223	4283.59
ACH-000713	1.71	18	1.24655e+09	6.23273e+08	7114	4160.23
ACH-000714	3.29	23	1.9557e+09	6.519e+08	11132	3383.59
ACH-000715	2.04	8	6.92337e+08	3.46168e+08	3793	1859.31
ACH-000716	3.31	19	1.30751e+09	4.35835e+08	7321	2211.78
ACH-000717	2.89	20	1.57431e+09	5.24768e+08	7542	2609.69
ACH-000718	2.99	22	1.80349e+09	6.01163e+08	8114	2713.71
ACH-000719	2.18	6	5.17976e+08	2.58988e+08	3162	1450.46
ACH-000720	3.15	18	1.68528e+09	5.61759e+08	7344	2331.43
ACH-000721	3.62	26	1.79781e+09	4.49452e+08	11777	3253.31
ACH-000722	3.31	17	1.59247e+09	5.30823e+08	6157	1860.12
ACH-000723	3.3	21	1.67143e+09	5.57145e+08	7765	2353.03
ACH-000724	2.88	21	1.34896e+09	4.49655e+08	8701	3021.18
ACH-000725	2.94	28	2.34171e+09	7.8057e+08	12251	4167.01
ACH-000726	1.8	17	1.12843e+09	5.64213e+08	7004	3891.11
ACH-000727	2.27	14	8.77052e+08	4.38526e+08	5502	2423.79
ACH-000728	2.01	4	2.98639e+08	1.4932e+08	2381	1184.58
ACH-000729	2.05	10	1.01164e+09	5.05819e+08	4158	2028.29
ACH-000730	2.81	24	1.58851e+09	5.29503e+08	9622	3424.2
ACH-000731	2.68	23	1.97313e+09	6.57709e+08	9045	3375
ACH-000732	2.01	9	4.86398e+08	2.43199e+08	2754	1370.15
ACH-000733	2.96	25	1.95745e+09	6.52484e+08	11414	3856.08
ACH-000734	2.2	13	7.85055e+08	3.92527e+08	5186	2357.27
ACH-000735	2.05	9	7.7178e+08	3.8589e+08	3085	1504.88
ACH-000736	2.24	12	7.70798e+08	3.85399e+08	4740	2116.07
ACH-000737	2.69	32	2.78066e+09	9.26885e+08	15533	5774.35
ACH-000738	3.02	18	1.56121e+09	5.20405e+08	7989	2645.36
ACH-000739	2.26	8	7.59723e+08	3.79861e+08	3499	1548.23
ACH-000740	2.95	23	1.76415e+09	5.88051e+08	10050	3406.78
ACH-000742	2	0	0	0	0	0
ACH-000743	2.92	16	1.31344e+09	4.37813e+08	5462	1870.55
ACH-000744	2.82	23	1.86941e+09	6.23135e+08	9134	3239.01
ACH-000745	2.03	2	219286424	109643212	1489	733.498
ACH-000746	2.76	23	1.55681e+09	5.18936e+08	9705	3516.3
ACH-000747	2.44	16	1.23611e+09	6.18054e+08	6519	2671.72
ACH-000748	2.05	5	4.30723e+08	2.15362e+08	2705	1319.51
ACH-000749	2.73	20	1504009574	5.01337e+08	8560	3135.53
ACH-000750	3.29	17	1.24007e+09	4.13356e+08	7906	2403.04
ACH-000751	3.32	17	1.44721e+09	4.82402e+08	7782	2343.98
ACH-000752	2.42	15	1.27521e+09	6.37605e+08	7066	2919.83
ACH-000753	3.36	17	1.21623e+09	4.0541e+08	6775	2016.37
ACH-000754	2.2	8	7.43814e+08	3.71907e+08	4149	1885.91
ACH-000755	2.12	13	1.10764e+09	5.53818e+08	6290	2966.98
ACH-000756	2.29	7	6.73056e+08	3.36528e+08	2806	1225.33
ACH-000758	2.3	14	1.0664e+09	5.33199e+08	6023	2618.7
ACH-000759	2.04	13	915152684	457576342	5982	2932.35
ACH-000760	3.48	15	1.05539e+09	3.51796e+08	5729	1646.26
ACH-000761	5.5	33	3.31419e+09	5.52364e+08	15962	2902.18
ACH-000762	2.91	14	1039851478	3.46617e+08	5537	1902.75
ACH-000763	1.97	5	6.55302e+08	3.27651e+08	2954	1499.49
ACH-000764	4.75	28	2.83456e+09	5.66912e+08	12434	2617.68
ACH-000765	2.59	24	1.90144e+09	6.33814e+08	11033	4259.85
ACH-000766	2.5	17	1.32856e+09	6.64278e+08	7144	2857.6
ACH-000767	3.08	23	1.47225e+09	4.90749e+08	10064	3267.53
ACH-000768	2.8	17	1.20283e+09	4.00943e+08	6878	2456.43
ACH-000769	1.2	3	1.81227e+08	1.81227e+08	1337	1114.17
ACH-000770	2.1	6	6.01777e+08	3.00889e+08	3032	1443.81
ACH-000771	2.03	7	6.11033e+08	3.05516e+08	2651	1305.91
ACH-000772	2.06	2	2.07115e+08	1.03557e+08	649	315.049
ACH-000773	1.9	13	8.29653e+08	4.14826e+08	5516	2903.16
ACH-000774	2.82	23	1.75935e+09	5.86451e+08	11053	3919.5
ACH-000775	2.69	23	1.81798e+09	6.05993e+08	10589	3936.43
ACH-000776	3.66	26	2.30757e+09	5.76893e+08	11637	3179.51
ACH-000777	3.26	13	1.13861e+09	3.79537e+08	5062	1552.76
ACH-000778	2.74	19	1.42515e+09	4.7505e+08	8692	3172.26
ACH-000780	1.71	16	1.06492e+09	5.32462e+08	6035	3529.24
ACH-000781	2.66	21	1.40117e+09	4.67056e+08	8702	3271.43
ACH-000782	1.95	2	2.00116e+08	1.00058e+08	586	300.513
ACH-000783	1.96	12	8.54067e+08	4.27033e+08	5795	2956.63
ACH-000784	2.69	22	1.56878e+09	5.22928e+08	10258	3813.38
ACH-000785	3.45	18	1.95218e+09	6.50725e+08	7211	2090.14
ACH-000786	2	1	8.85792e+07	4.42896e+07	582	291
ACH-000787	3.11	18	1.31756e+09	4.39187e+08	7829	2517.36
ACH-000788	2.21	8	6.72242e+08	3.36121e+08	3763	1702.71
ACH-000789	2.62	29	2.10049e+09	7.00162e+08	11286	4307.63
ACH-000790	2.09	14	8.58478e+08	4.29239e+08	4642	2221.05
ACH-000791	3.48	18	1.52176e+09	5.07253e+08	7426	2133.91
ACH-000792	2	10	7.27631e+08	3.63815e+08	3128	1564
ACH-000793	3.68	23	2.06619e+09	5.16546e+08	11155	3031.25
ACH-000794	2.03	8	5.99569e+08	2.99784e+08	3619	1782.76
ACH-000795	2.01	2	5.17778e+07	2.58889e+07	599	298.01
ACH-000796	1.94	10	4.74442e+08	2.37221e+08	3658	1885.57
ACH-000797	2	0	2.09002e+07	1.04501e+07	0	0
ACH-000798	2.08	3	2.64771e+08	1.32386e+08	1300	625
ACH-000799	2.6	27	2.05735e+09	6.85782e+08	12319	4738.08
ACH-000800	3.16	21	1.57698e+09	5.2566e+08	9996	3163.29
ACH-000802	2.76	20	1.41443e+09	4.71478e+08	8333	3019.2
ACH-000803	3.17	22	2.06299e+09	6.87664e+08	10559	3330.91
ACH-000804	1.97	11	6.59342e+08	3.29671e+08	6467	3282.74
ACH-000805	2.14	9	5.5091e+08	2.75455e+08	3593	1678.97
ACH-000806	2.95	17	1.23701e+09	4.12337e+08	7104	2408.14
ACH-000807	4.42	25	2.05228e+09	5.13069e+08	11382	2575.11
ACH-000808	2.42	14	1.06645e+09	5.33226e+08	6582	2719.83
ACH-000809	2.26	11	7.88278e+08	3.94139e+08	4619	2043.81
ACH-000810	3.84	22	1.79293e+09	4.48234e+08	9594	2498.44
ACH-000811	1.9	5	2.65139e+08	1.3257e+08	1664	875.789
ACH-000812	2.8	19	1.48607e+09	4.95357e+08	7895	2819.64
ACH-000813	1.9	7	498755209	2.49378e+08	3068	1614.74
ACH-000815	2.96	19	1.35101e+09	4.50336e+08	7245	2447.64
ACH-000816	2.22	13	8.29643e+08	4.14822e+08	5437	2449.1
ACH-000817	2.98	27	1.96847e+09	6.56158e+08	11421	3832.55
ACH-000818	1.91	14	9.09594e+08	4.54797e+08	4934	2583.25
ACH-000819	2.6	21	1.67883e+09	5.59609e+08	8573	3297.31
ACH-000820	3.04	21	1.67398e+09	5.57993e+08	8584	2823.68
ACH-000821	3.09	24	1.86309e+09	6.21032e+08	10070	3258.9
ACH-000822	1.94	8	5.24523e+08	2.62262e+08	2712	1397.94
ACH-000823	3	22	1.70991e+09	5.6997e+08	8292	2764
ACH-000824	3.75	24	2.07441e+09	5.18602e+08	9812	2616.53
ACH-000826	2.54	28	1.9729e+09	6.57633e+08	12801	5039.76
ACH-000827	2.34	7	9.10094e+08	4.55047e+08	3516	1502.56
ACH-000828	1.98	15	9.16064e+08	4.58032e+08	6516	3290.91
ACH-000829	1.99	1	1.67612e+08	8.38059e+07	583	292.965
ACH-000830	2.06	5	4.74521e+08	2.37261e+08	2537	1231.55
ACH-000831	2.32	10	1.01751e+09	5.08756e+08	4970	2142.24
ACH-000832	1.98	8	7.483e+08	3.7415e+08	2623	1324.75
ACH-000833	4.6	28	2.80833e+09	5.61666e+08	12758	2773.48
ACH-000834	2.84	20	1.36584e+09	4.55279e+08	7858	2766.9
ACH-000835	2.87	16	1.2235e+09	4.07833e+08	7140	2487.8
ACH-000836	3.03	18	1.16244e+09	3.87481e+08	6590	2174.92
ACH-000837	2.38	14	1.06946e+09	5.34728e+08	5853	2459.24
ACH-000838	1.91	6	5.6864e+08	2.8432e+08	2927	1532.46
ACH-000839	3.24	17	1.10999e+09	3.69995e+08	6633	2047.22
ACH-000840	2.48	17	1.3558e+09	6.77899e+08	7741	3121.37
ACH-000841	2.84	24	1.74887e+09	5.82956e+08	9567	3368.66
ACH-000842	2.56	24	1.72225e+09	5.74084e+08	11134	4349.22
ACH-000843	2.95	21	1.53938e+09	5.13126e+08	8899	3016.61
ACH-000844	2.98	22	1.75432e+09	5.84772e+08	8922	2993.96
ACH-000845	2.87	24	1.52072e+09	5.06906e+08	8993	3133.45
ACH-000846	1.72	19	1.19498e+09	5.97488e+08	7581	4407.56
ACH-000847	3.08	15	1.16583e+09	3.88611e+08	7024	2280.52
ACH-000848	3.1	18	1.33634e+09	4.45448e+08	6748	2176.77
ACH-000849	1.58	25	1.67774e+09	8.38872e+08	10342	6545.57
ACH-000850	2	0	1.0455e+07	5.22751e+06	0	0
ACH-000851	1.16	7	6.44438e+08	6.44438e+08	2428	2093.1
ACH-000852	1.87	18	1.43613e+09	7.18065e+08	7513	4017.65
ACH-000853	1.35	8	6.07347e+08	6.07347e+08	3653	2705.93
ACH-000855	3.14	14	8.85782e+08	2.95261e+08	5379	1713.06
ACH-000856	2	0	2.74051e+07	1.37025e+07	0	0
ACH-000857	2.65	27	2.17955e+09	7.26517e+08	12078	4557.74
ACH-000858	2.62	24	1.99947e+09	6.66491e+08	10285	3925.57
ACH-000859	4.53	30	2.85345e+09	5.7069e+08	13671	3017.88
ACH-000860	3.46	24	2.01265e+09	6.70885e+08	10373	2997.98
ACH-000862	1.8	17	1.27284e+09	6.3642e+08	8389	4660.56
ACH-000863	3.79	27	2.19653e+09	5.49131e+08	11833	3122.16
ACH-000864	2.31	10	9.84034e+08	4.92017e+08	4906	2123.81
ACH-000865	2.39	18	1.07032e+09	5.35158e+08	6962	2912.97
ACH-000866	2.03	3	3.63726e+08	1.81863e+08	1733	853.695
ACH-000867	2.24	16	1.20106e+09	6.00531e+08	7015	3131.7
ACH-000868	2.21	19	1.30838e+09	6.54192e+08	7530	3407.24
ACH-000869	2.59	28	2.10315e+09	7.0105e+08	11762	4541.31
ACH-000870	3.08	19	1.3156e+09	4.38532e+08	6701	2175.65
ACH-000871	2.77	21	1.53416e+09	5.11386e+08	7872	2841.88
ACH-000873	1.46	11	1.01525e+09	1.01525e+09	4626	3168.49
ACH-000874	2.03	4	3.11478e+08	1.55739e+08	1510	743.842
ACH-000875	2.06	11	7.89297e+08	3.94649e+08	5510	2674.76
ACH-000876	1.63	20	1.52456e+09	7.6228e+08	8664	5315.34
ACH-000877	2.01	0	0	0	0	0
ACH-000878	1.73	13	8.0922e+08	4.0461e+08	4396	2541.04
ACH-000879	2	0	0	0	0	0
ACH-000880	2.1	6	5.27573e+08	2.63786e+08	3008	1432.38
ACH-000881	2.23	12	8.39826e+08	4.19913e+08	5317	2384.3
ACH-000882	3.23	18	1.18543e+09	3.95143e+08	7436	2302.17
ACH-000883	1.89	7	7.36862e+08	3.68431e+08	3445	1822.75
ACH-000884	2.6	21	1.69926e+09	5.6642e+08	10824	4163.08
ACH-000885	2.05	2	1.72025e+08	8.60124e+07	706	344.39
ACH-000886	2.36	9	9.03207e+08	4.51603e+08	3731	1580.93
ACH-000888	3.4	21	1.62382e+09	5.41272e+08	8671	2550.29
ACH-000889	3.08	15	1.08617e+09	3.62058e+08	7264	2358.44
ACH-000890	2.93	22	1.60313e+09	5.34376e+08	9105	3107.51
ACH-000892	3.87	24	2.11647e+09	5.29117e+08	10439	2697.42
ACH-000893	2.92	24	2.02868e+09	6.76225e+08	10423	3569.52
ACH-000894	3.99	31	2.78196e+09	6.95489e+08	13321	3338.6
ACH-000895	1.98	0	5.17881e+07	2.58941e+07	0	0
ACH-000896	2.51	27	2.04674e+09	6.82248e+08	12027	4791.63
ACH-000897	2.45	15	1.02759e+09	5.13796e+08	6946	2835.1
ACH-000898	2.3	10	7.41824e+08	3.70912e+08	4300	1869.57
ACH-000899	2.32	16	9.91434e+08	4.95717e+08	6552	2824.14
ACH-000900	2.56	26	2.14891e+09	7.16305e+08	10990	4292.97
ACH-000901	3.36	19	1.40454e+09	4.6818e+08	8175	2433.04
ACH-000902	2.09	9	646017830	323008915	3782	1809.57
ACH-000903	1.21	6	530571480	530571480	3850	3181.82
ACH-000904	3.54	26	2.29131e+09	5.72828e+08	11250	3177.97
ACH-000905	3.06	21	1.39185e+09	4.63951e+08	8397	2744.12
ACH-000906	3.23	13	1.01079e+09	3.36932e+08	4113	1273.37
ACH-000907	3.31	15	1.71064e+09	5.70214e+08	7261	2193.66
ACH-000908	2.29	7	6.72747e+08	3.36373e+08	3068	1339.74
ACH-000909	2.18	4	4.55954e+08	2.27977e+08	1892	867.89
ACH-000910	2.19	11	8.2617e+08	4.13085e+08	4577	2089.95
ACH-000911	2.45	12	9.97355e+08	4.98677e+08	5549	2264.9
ACH-000912	1.86	9	6.95607e+08	3.47803e+08	3768	2025.81
ACH-000913	2.03	1	9.10873e+07	4.55436e+07	586	288.67
ACH-000914	1.97	2	143900000	71950000	683	346.701
ACH-000915	3.56	25	1.96842e+09	4.92105e+08	11391	3199.72
ACH-000916	1.71	15	8.17569e+08	4.08784e+08	5765	3371.35
ACH-000917	2.63	30	2.4902e+09	8.30067e+08	14320	5444.87
ACH-000918	2.02	2	1.42353e+08	7.11767e+07	861	426.238
ACH-000919	2.09	5	4.33644e+08	2.16822e+08	1818	869.856
ACH-000920	1.99	1	1.31443e+08	6.57217e+07	821	412.563
ACH-000921	2.14	12	729414020	364707010	4364	2039.25
ACH-000922	2.09	2	1.94931e+08	9.74654e+07	649	310.526
ACH-000923	2.08	4	3.19097e+08	1.59549e+08	1335	641.827
ACH-000924	4.64	33	3.0086e+09	6.01719e+08	14759	3180.82
ACH-000925	2.06	2	1.89326e+08	9.46628e+07	649	315.049
ACH-000926	1.78	11	6.50801e+08	3.254e+08	3880	2179.78
ACH-000927	2.68	28	2.12977e+09	7.09925e+08	12825	4785.45
ACH-000928	2	0	0	0	0	0
ACH-000929	2.67	27	2.05282e+09	6.84274e+08	10607	3972.66
ACH-000930	3.31	20	1.81063e+09	6.03544e+08	9168	2769.79
ACH-000931	3.58	26	1.92184e+09	4.80459e+08	11299	3156.15
ACH-000932	2.01	2	1.02114e+08	5.10568e+07	517	257.214
ACH-000933	2.06	8	7.44243e+08	3.72121e+08	3785	1837.38
ACH-000934	2.75	23	1.51483e+09	5.04942e+08	10391	3778.55
ACH-000935	2.12	12	669898130	334949065	4235	1997.64
ACH-000936	2.02	3	1.32649e+08	6.63246e+07	722	357.426
ACH-000937	2.01	2	9.79757e+07	4.89879e+07	495	246.269
ACH-000938	2	0	0	0	0	0
ACH-000939	1.97	1	126610320	63305160	308	156.345
ACH-000940	2.21	7	6.08021e+08	3.04011e+08	3198	1447.06
ACH-000941	1.95	6	4.56623e+08	2.28311e+08	2758	1414.36
ACH-000942	1.94	2	2.18987e+08	1.09493e+08	922	475.258
ACH-000943	2.15	5	4.45528e+08	2.22764e+08	1651	767.907
ACH-000944	2.05	7	5.8268e+08	2.9134e+08	2805	1368.29
ACH-000945	4.62	25	2.4404e+09	4.8808e+08	10785	2334.42
ACH-000946	2	0	0	0	0	0
ACH-000947	2.09	3	2.83747e+08	1.41874e+08	1642	785.646
ACH-000948	2.09	3	3.37673e+08	1.68836e+08	1786	854.545
ACH-000949	2.05	5	3.41539e+08	1.7077e+08	2160	1053.66
ACH-000950	2.2	7	5.64327e+08	2.82164e+08	3196	1452.73
ACH-000951	4.55	28	2.60125e+09	5.2025e+08	12876	2829.89
ACH-000952	2.05	3	4.08691e+08	2.04346e+08	1194	582.439
ACH-000953	1.98	1	1.00246e+08	5.01232e+07	536	270.707
ACH-000954	2.14	5	4.06042e+08	2.03021e+08	2813	1314.49
ACH-000955	2.08	2	3.39011e+08	1.69506e+08	1187	570.673
ACH-000956	2.13	6	4.68522e+08	2.34261e+08	3040	1427.23
ACH-000957	2	0	5.60601e+07	2.80301e+07	0	0
ACH-000958	2.09	4	3.14504e+08	1.57252e+08	1863	891.388
ACH-000959	1.99	0	1.6704e+07	8.35201e+06	0	0
ACH-000960	1.99	0	4.59011e+07	2.29506e+07	0	0
ACH-000961	2.06	2	1.85947e+08	9.29735e+07	992	481.553
ACH-000962	2.95	10	7.95648e+08	2.65216e+08	3163	1072.2
ACH-000963	1.98	5	2.06993e+08	1.03496e+08	1943	981.313
ACH-000965	2.05	3	2.67646e+08	1.33823e+08	1062	518.049
ACH-000966	2	1	7.42368e+07	3.71184e+07	196	98
ACH-000967	1.98	4	2.56725e+08	1.28363e+08	1915	967.172
ACH-000968	3.68	22	1.99192e+09	4.9798e+08	11527	3132.34
ACH-000969	2	7	4.21698e+08	2.10849e+08	2248	1124
ACH-000970	2.05	4	1.781e+08	8.90498e+07	1317	642.439
ACH-000971	2.06	0	9.47716e+07	4.73858e+07	0	0
ACH-000972	2	0	3.08382e+07	1.54191e+07	0	0
ACH-000973	2.3	10	674816716	337408358	4092	1779.13
ACH-000974	2	0	6.82507e+06	3.41254e+06	0	0
ACH-000976	3.28	21	1.74874e+09	5.82914e+08	8520	2597.56
ACH-000977	1.97	1	8.93153e+07	4.46577e+07	458	232.487
ACH-000978	2.02	1	1.51673e+08	7.58367e+07	278	137.624
ACH-000979	2.68	21	1.49626e+09	4.98755e+08	8659	3230.97
ACH-000980	2.08	4	2.69037e+08	1.34518e+08	1080	519.231
ACH-000981	1.99	1	9.23681e+07	4.6184e+07	205	103.015
ACH-000982	2	0	6.49247e+07	3.24624e+07	0	0
ACH-000983	2.24	10	7.77659e+08	3.8883e+08	4502	2009.82
ACH-000984	1.96	5	3.17588e+08	1.58794e+08	1078	550
ACH-000985	3.41	17	1.37425e+09	4.58082e+08	6357	1864.22
ACH-000986	2.1	7	5.4927e+08	2.74635e+08	2653	1263.33
ACH-000987	2.02	3	1.9512e+08	9.75599e+07	1562	773.267
ACH-000988	2	0	570905	285453	0	0
ACH-000989	2.05	2	1.68817e+08	8.44086e+07	861	420
ACH-000990	1.67	6	6.17906e+08	3.08953e+08	3445	2062.87
ACH-000991	2	1	7.95521e+07	3.97761e+07	440	220
ACH-000992	2.93	24	1.97252e+09	6.57506e+08	11726	4002.05
ACH-000993	2	1	5.85271e+07	2.92635e+07	582	291
ACH-000994	2.02	4	1.44183e+08	7.20914e+07	1312	649.505
ACH-000996	2.06	1	1.58234e+08	7.91169e+07	545	264.563
ACH-000997	2	0	8.8409e+06	4.42045e+06	0	0
ACH-000998	2	1	4.70436e+07	2.35218e+07	225	112.5
ACH-000999	2.02	2	1.17021e+08	5.85105e+07	517	255.941
ACH-001000	3.45	16	1.55745e+09	5.1915e+08	7749	2246.09
ACH-001001	3.61	23	1.77748e+09	4.4437e+08	10188	2822.16
ACH-001015	1.99	0	1.32663e+08	6.63313e+07	0	0
ACH-001016	2.8	18	1.40442e+09	4.68139e+08	7893	2818.93
ACH-001021	2.29	9	7.36644e+08	3.68322e+08	3765	1644.1
ACH-001023	3.31	18	1.41894e+09	4.72978e+08	9139	2761.03
ACH-001024	3.49	19	1.63281e+09	5.44269e+08	9317	2669.63
ACH-001036	1.81	18	1.37529e+09	6.87644e+08	6816	3765.75
ACH-001037	2.08	8	5.12094e+08	2.56047e+08	3468	1667.31
ACH-001039	3.34	19	1.79173e+09	5.97244e+08	8281	2479.34
ACH-001042	2.23	9	6.72483e+08	3.36242e+08	4324	1939.01
ACH-001043	2.91	26	2.16623e+09	7.22076e+08	11832	4065.98
ACH-001044	2.72	25	1.69228e+09	5.64092e+08	11498	4227.21
ACH-001045	2.71	24	1.73442e+09	5.78139e+08	9978	3681.92
ACH-001047	1.93	7	5.75118e+08	2.87559e+08	3128	1620.73
ACH-001048	1.67	16	1.06097e+09	5.30483e+08	7857	4704.79
ACH-001049	2.11	10	6.94102e+08	3.47051e+08	4247	2012.8
ACH-001061	2.02	0	6.59235e+07	3.29618e+07	0	0
ACH-001063	3.21	14	9.56828e+08	3.18943e+08	6314	1966.98
ACH-001064	1.72	15	1.12021e+09	5.60105e+08	4883	2838.95
ACH-001065	3	23	2.00417e+09	6.68056e+08	8885	2961.67
ACH-001067	2.03	2	145138636	72569318	649	319.704
ACH-001072	2.88	19	1.37042e+09	4.56805e+08	7081	2458.68
ACH-001075	2.1	7	393021332	196510666	2600	1238.1
ACH-001079	1.77	16	1.07461e+09	5.37305e+08	6781	3831.07
ACH-001088	2.36	16	1.3285e+09	6.64248e+08	7967	3375.85
ACH-001089	2.76	26	2.17708e+09	7.25694e+08	11473	4156.88
ACH-001090	3.12	19	1.31629e+09	4.38764e+08	7773	2491.35
ACH-001091	2.03	1	1.28984e+08	6.44918e+07	308	151.724
ACH-001092	2.42	17	1274586955	6.37293e+08	7706	3184.3
ACH-001093	2	0	0	0	0	0
ACH-001094	2.22	7	5.78324e+08	2.89162e+08	2951	1329.28
ACH-001098	2.8	18	1.22349e+09	4.07831e+08	6754	2412.14
ACH-001101	2.53	26	2.00088e+09	6.6696e+08	10360	4094.86
ACH-001106	2	0	0	0	0	0
ACH-001113	7.44	15	2.13223e+09	3.04604e+08	6173	829.704
ACH-001121	3.19	22	1.35469e+09	4.51565e+08	9388	2942.95
ACH-001125	1.62	19	1.48594e+09	7.42971e+08	8418	5196.3
ACH-001126	1.93	6	4.68885e+08	2.34442e+08	2318	1201.04
ACH-001127	4.2	15	1.05932e+09	2.6483e+08	6075	1446.43
ACH-001129	2.09	8	5.0054e+08	2.5027e+08	2301	1100.96
ACH-001130	2	4	2.08226e+08	1.04113e+08	1610	805
ACH-001138	3	23	1.95498e+09	6.5166e+08	10184	3394.67
ACH-001145	2.96	10	7.75516e+08	2.58505e+08	3163	1068.58
ACH-001146	2.07	1	1.2572e+08	6.28598e+07	582	281.159
ACH-001150	7.37	4	5.93545e+08	8.47921e+07	1582	214.654
ACH-001162	2.01	7	4.84954e+08	2.42477e+08	3416	1699.5
ACH-001171	1.75	11	8.46742e+08	4.23371e+08	4301	2457.71
ACH-001175	1.83	8	7.00034e+08	3.50017e+08	3398	1856.83
ACH-001183	2.02	9	6.7307e+08	3.36535e+08	3076	1522.77
ACH-001188	2.12	4	3.61671e+08	1.80835e+08	2601	1226.89
ACH-001189	4.93	23	2.04207e+09	4.08414e+08	9760	1979.72
ACH-001190	2.18	11	9.1555e+08	4.57775e+08	5039	2311.47
ACH-001194	2.04	13	9.86192e+08	4.93096e+08	5220	2558.82
ACH-001198	2.84	16	1.06614e+09	3.5538e+08	6210	2186.62
ACH-001203	2.1	8	7.55444e+08	3.77722e+08	2504	1192.38
ACH-001205	2.12	3	4.50668e+08	2.25334e+08	1585	747.642
ACH-001214	2.74	19	1.41539e+09	4.71796e+08	7994	2917.52
ACH-001224	2.56	21	1.68174e+09	5.60581e+08	9046	3533.59
ACH-001225	4.08	25	2.55828e+09	6.39569e+08	12285	3011.03
ACH-001230	2.13	9	6.22999e+08	3.11499e+08	4995	2345.07
ACH-001233	2.44	20	1.50012e+09	7.50059e+08	8983	3681.56
ACH-001234	1.8	16	1.09179e+09	5.45896e+08	5816	3231.11
ACH-001239	1.94	14	8.33173e+08	4.16587e+08	4986	2570.1
ACH-001249	3.42	17	1.87078e+09	6.23594e+08	7750	2266.08
ACH-001306	3.19	23	1.70344e+09	5.67814e+08	9671	3031.66
ACH-001307	2.83	24	1.69987e+09	5.66622e+08	9534	3368.9
ACH-001318	2.58	20	1.52459e+09	5.08198e+08	8618	3340.31
ACH-001321	1.93	11	8.95841e+08	4.4792e+08	5689	2947.67
