# Supplementary material for: Extensive protein dosage compensation in aneuploid human cancers
Source: HighWire-hosted journal article supplement (doi:10.1101/gr.276378.121), 2022-06-14
Supplement: Supplemental_Sheltzer_R_Code.zip [file Cell_Line_Used_Info.xlsx]

## Sheet: Sheet1
	DepMap_ID	cell_line_name	stripped_cell_line_name	CCLE_Name	alias	COSMICID	sex	source	Achilles_n_replicates	cell_line_NNMD	culture_type	culture_medium	cas9_activity	RRID	WTSI_Master_Cell_ID	sample_collection_site	primary_or_metastasis	primary_disease	Subtype	age	Sanger_Model_ID	depmap_public_comments	lineage	lineage_subtype	lineage_sub_subtype	lineage_molecular_subtype
1	ACH-000001	NIH:OVCAR-3	NIHOVCAR3	NIHOVCAR3_OVARY	OVCAR3	905933	Female	ATCC	#N/A	#N/A	#N/A	#N/A	#N/A	CVCL_0465	2201	ascites	Metastasis	Ovarian Cancer	Adenocarcinoma, high grade serous	60	SIDM00105	#N/A	ovary	ovary_adenocarcinoma	high_grade_serous	#N/A
2	ACH-000004	HEL	HEL	HEL_HAEMATOPOIETIC_AND_LYMPHOID_TISSUE	#N/A	907053	Male	DSMZ	2	-3.0792	Suspension	RPMI + 10% FBS	52.4	CVCL_0001	783	haematopoietic_and_lymphoid_tissue	#N/A	Leukemia	Acute Myelogenous Leukemia (AML), M6 (Erythroleukemia)	30	SIDM00594	#N/A	blood	AML	M6	#N/A
3	ACH-000005	HEL 92.1.7	HEL9217	HEL9217_HAEMATOPOIETIC_AND_LYMPHOID_TISSUE	#N/A	#N/A	Male	ATCC	2	-2.40441	Suspension	RPMI + 10% FBS	86.6	CVCL_2481	#N/A	bone_marrow	#N/A	Leukemia	Acute Myelogenous Leukemia (AML), M6 (Erythroleukemia)	30	SIDM00593	#N/A	blood	AML	M6	#N/A
4	ACH-000006	MONO-MAC-6	MONOMAC6	MONOMAC6_HAEMATOPOIETIC_AND_LYMPHOID_TISSUE	#N/A	908148	Male	DSMZ	#N/A	#N/A	#N/A	#N/A	#N/A	CVCL_1426	2167	haematopoietic_and_lymphoid_tissue	Primary	Leukemia	Acute Myelogenous Leukemia (AML), M5 (Eosinophilic/Monocytic)	64	SIDM01023	#N/A	blood	AML	M5	#N/A
5	ACH-000007	LS513	LS513	LS513_LARGE_INTESTINE	#N/A	907795	Male	ATCC	2	-2.58671	Adherent	RPMI + 10% FBS	47.7	CVCL_1386	569	large_intestine	Primary	Colon/Colorectal Cancer	Adenocarcinoma	63	SIDM00677	#N/A	colorectal	colorectal_adenocarcinoma	#N/A	#N/A
6	ACH-000008	A101D	A101D	A101D_SKIN	#N/A	910921	Male	ATCC	#N/A	#N/A	#N/A	#N/A	#N/A	CVCL_1057	1806	skin	#N/A	Skin Cancer	Melanoma	56	SIDM00801	#N/A	skin	melanoma	#N/A	#N/A
7	ACH-000012	HCC827	HCC827	HCC827_LUNG	#N/A	1240146	Female	ATCC	3	-4.243	Adherent	RPMI + 10% FBS	87.3	CVCL_2063	354	lung	Primary	Lung Cancer	Non-Small Cell Lung Cancer (NSCLC), Adenocarcinoma	39	SIDM01067	#N/A	lung	NSCLC	NSCLC_adenocarcinoma	#N/A
8	ACH-000014	Hs 294T	HS294T	HS294T_SKIN	A101D, Hs 294.T	#N/A	Male	ATCC	2	-3.48499	Adherent	DMEM + 10% FBS	84.9	CVCL_0331	#N/A	lymph_node	Metastasis	Skin Cancer	Melanoma	56	SIDM00800	#N/A	skin	melanoma	#N/A	#N/A
9	ACH-000015	NCI-H1581	NCIH1581	NCIH1581_LUNG	NCI-H2077	908471	Male	ATCC	2	-4.22616	Mixed adherent and suspension	DMEM:F12 (1:1) + 5% FBS	47.2	CVCL_1479	1237	lung	Primary	Lung Cancer	Non-Small Cell Lung Cancer (NSCLC), Large Cell Carcinoma	44	SIDM00748	#N/A	lung	NSCLC	NSCLC_large_cell	#N/A
10	ACH-000018	T24	T24	T24_URINARY_TRACT	#N/A	724812	Female	ATCC	2	-2.94569	Adherent	McCoy's 5A + 10% FBS	65.2	CVCL_0554	1455	urinary_tract	Primary	Bladder Cancer	Carcinoma	81	SIDM01184	#N/A	urinary_tract	bladder_carcinoma	#N/A	#N/A
11	ACH-000019	MCF7	MCF7	MCF7_BREAST	#N/A	905946	Female	ATCC	2	-2.49368	Adherent	EMEM + 10% FBS + 0.01mg/ml Insulin (Bovine)	65	CVCL_0031	588	pleural_effusion	Metastasis	Breast Cancer	Carcinoma	69	SIDM00148	#N/A	breast	breast_carcinoma	ERpos_HER2neg	luminal
12	ACH-000021	NCI-H1693	NCIH1693	NCIH1693_LUNG	#N/A	687802	Female	ATCC	4	-3.65051	Adherent	RPMI + 10% FBS	85.9	CVCL_1488	634	lymph_node	Metastasis	Lung Cancer	Non-Small Cell Lung Cancer (NSCLC), Adenocarcinoma	55	SIDM00742	#N/A	lung	NSCLC	NSCLC_adenocarcinoma	#N/A
13	ACH-000023	PA-TU-8988T	PATU8988T	PATU8988T_PANCREAS	#N/A	1240201	Female	DSMZ	#N/A	#N/A	#N/A	#N/A	#N/A	CVCL_1847	1242	liver	Metastasis	Pancreatic Cancer	Ductal Adenocarcinoma, exocrine	64	SIDM00453	#N/A	pancreas	exocrine	exocrine_adenocarcinoma	#N/A
14	ACH-000024	OPM-2	OPM2	OPM2_HAEMATOPOIETIC_AND_LYMPHOID_TISSUE	#N/A	909249	Female	DSMZ	2	-3.99218	Suspension	RPMI + 10% FBS	71.9	CVCL_1625	112	haematopoietic_and_lymphoid_tissue	Primary	Myeloma	Multiple Myeloma	56	SIDM00457	#N/A	plasma_cell	multiple_myeloma	#N/A	#N/A
15	ACH-000028	KPL-1	KPL1	KPL1_BREAST	#N/A	#N/A	Female	DSMZ	3	-3.41465	Adherent	DMEM + 10% FBS	69.6	CVCL_2094	#N/A	pleural_effusion	Metastasis	Breast Cancer	Carcinoma	50	SIDM00147	#N/A	breast	breast_carcinoma	ERpos_HER2neg	luminal
16	ACH-000030	PC-14	PC14	PC14_LUNG	#N/A	753608	Male	RIKEN	3	-5.25734	Adherent	RPMI + 10% FBS	91.6	CVCL_1640	198	lung	Primary	Lung Cancer	Non-Small Cell Lung Cancer (NSCLC), Adenocarcinoma	#N/A	SIDM00237	#N/A	lung	NSCLC	NSCLC_adenocarcinoma	#N/A
17	ACH-000035	NCI-H1650	NCIH1650	NCIH1650_LUNG	#N/A	687800	Male	ATCC	2	-3.0233	Adherent	RPMI + 10% FBS	91.5	CVCL_1483	1548	pleural_effusion	Metastasis	Lung Cancer	Non-Small Cell Lung Cancer (NSCLC), Adenocarcinoma	27	SIDM00745	#N/A	lung	NSCLC	NSCLC_adenocarcinoma	#N/A
18	ACH-000039	SK-N-MC	SKNMC	SKNMC_BONE	#N/A	#N/A	Female	ATCC	3	-2.62797	Adherent	EMEM + 10% FBS	65.3	CVCL_0530	#N/A	bone	Metastasis	Bone Cancer	Ewings Sarcoma	14	SIDM00634	#N/A	bone	Ewing_sarcoma	#N/A	EWS_FLI
19	ACH-000040	U-118 MG	U118MG	U118MG_CENTRAL_NERVOUS_SYSTEM	#N/A	687588	Male	ATCC	2	-3.7855	Adherent	DMEM + 10% FBS	69.1	CVCL_0633	7	central_nervous_system	Primary	Brain Cancer	Astrocytoma	#N/A	SIDM01193	#N/A	central_nervous_system	glioma	astrocytoma	#N/A
20	ACH-000042	Panc 02.03	PANC0203	PANC0203_PANCREAS	#N/A	1298475	Female	ATCC	4	-3.3423	Adherent	RPMI + 10% FBS + 1mM Sodium pyruvate	88.9	CVCL_1633	1838	pancreas	Primary	Pancreatic Cancer	Ductal Adenocarcinoma, exocrine	70	SIDM01139	#N/A	pancreas	exocrine	exocrine_adenocarcinoma	#N/A
21	ACH-000050	NCI-H929	NCIH929	NCIH929_HAEMATOPOIETIC_AND_LYMPHOID_TISSUE	#N/A	724825	Female	ATCC	#N/A	#N/A	#N/A	#N/A	#N/A	CVCL_1600	1230	pleural_effusion	Metastasis	Myeloma	Multiple Myeloma, plasmacytoma	62	SIDM01148	#N/A	plasma_cell	multiple_myeloma	plasmacytoma	#N/A
22	ACH-000053	KARPAS-299	KARPAS299	KARPAS299_HAEMATOPOIETIC_AND_LYMPHOID_TISSUE	#N/A	907273	Male	Academic lab	3	-5.3513	Suspension	RPMI + 20% FBS + 2mM Glutamine	55.5	CVCL_1324	906	haematopoietic_and_lymphoid_tissue	#N/A	Lymphoma	T-cell, Non-Hodgkins, Anaplastic Large Cell (ALCL)	25	SIDM01010	#N/A	lymphocyte	non_hodgkin_lymphoma	t_cell_ALCL	#N/A
23	ACH-000054	HT-1080	HT1080	HT1080_SOFT_TISSUE	#N/A	907064	Male	ATCC	2	-3.87194	Adherent	EMEM + 10% FBS	85.9	CVCL_0317	1391	soft_tissue	Metastasis	Sarcoma	Fibrosarcoma	35	SIDM00828	#N/A	soft_tissue	fibrosarcoma	#N/A	#N/A
24	ACH-000062	RERF-LC-MS	RERFLCMS	RERFLCMS_LUNG	#N/A	910931	Male	JCRB	#N/A	#N/A	#N/A	#N/A	#N/A	CVCL_1655	2051	lung	Primary	Lung Cancer	Non-Small Cell Lung Cancer (NSCLC), Adenocarcinoma	#N/A	SIDM00355	#N/A	lung	NSCLC	NSCLC_adenocarcinoma	#N/A
25	ACH-000065	OCI-AML5	OCIAML5	OCIAML5_HAEMATOPOIETIC_AND_LYMPHOID_TISSUE	#N/A	1330983	Male	DSMZ	#N/A	#N/A	#N/A	#N/A	#N/A	CVCL_1620	2130	haematopoietic_and_lymphoid_tissue	Primary	Leukemia	Acute Myelogenous Leukemia (AML)	77	SIDM00461	#N/A	blood	AML	#N/A	#N/A
26	ACH-000068	REC-1	REC1	REC1_HAEMATOPOIETIC_AND_LYMPHOID_TISSUE	#N/A	#N/A	Male	DSMZ	#N/A	#N/A	#N/A	#N/A	#N/A	CVCL_1884	#N/A	lymph_node	#N/A	Lymphoma	B-cell, Non-Hodgkins, Mantle Cell	61	#N/A	#N/A	lymphocyte	non_hodgkin_lymphoma	b_cell_mantle_cell	#N/A
27	ACH-000070	697	697	697_HAEMATOPOIETIC_AND_LYMPHOID_TISSUE	#N/A	906800	Male	DSMZ	2	-3.46314	Adherent	RPMI + 20% heat inactivated FBS	52	CVCL_0079	63	bone_marrow	Primary	Leukemia	Acute Lymphoblastic Leukemia (ALL), B-cell	12	SIDM01076	#N/A	blood	ALL	b_cell	#N/A
28	ACH-000075	U-87 MG	U87MG	U87MG_CENTRAL_NERVOUS_SYSTEM	#N/A	687590	Unknown	ATCC	2	-2.31896	Adherent	EMEM + 10% FBS	62.1	CVCL_0022	549	central_nervous_system	Primary	Brain Cancer	Astrocytoma	44	SIDM01189	#N/A	central_nervous_system	glioma	astrocytoma	#N/A
29	ACH-000087	SK-ES-1	SKES1	SKES1_BONE	#N/A	684072	Male	ATCC	2	-3.08213	#N/A	McCoy's 5A + 15% FBS	58	CVCL_0627	41	bone	Primary	Bone Cancer	Ewings Sarcoma	18	SIDM01111	#N/A	bone	Ewing_sarcoma	#N/A	EWS_FLI
30	ACH-000090	PC-3	PC3	PC3_PROSTATE	#N/A	905934	Male	ATCC	0	-2.13462	Adherent	RPMI + 10% FBS	58.4	CVCL_0035	911	bone	Metastasis	Prostate Cancer	Adenocarcinoma	62	SIDM00088	#N/A	prostate	prostate_adenocarcinoma	#N/A	#N/A
31	ACH-000091	OV56	OV56	OV56_OVARY	#N/A	1480362	Female	ECACC	#N/A	#N/A	#N/A	#N/A	#N/A	CVCL_2673	686	ascites	Metastasis	Ovarian Cancer	Adenocarcinoma, serous	46	SIDM00475	#N/A	ovary	ovary_adenocarcinoma	serous	#N/A
32	ACH-000096	G-401	G401	G401_SOFT_TISSUE	#N/A	907299	Male	ATCC	2	-2.40531	Adherent	McCoy's 5A + 10% FBS	38	CVCL_0270	962	kidney	Primary	Rhabdoid	Malignant Rhabdoid Tumor	0.25	SIDM00856	#N/A	kidney	malignant_rhabdoid_tumor	#N/A	#N/A
33	ACH-000097	ZR-75-1	ZR751	ZR751_BREAST	#N/A	#N/A	Female	ATCC	2	-4.29023	Adherent	RPMI + 10% FBS	79.1	CVCL_0588	#N/A	ascites	Metastasis	Breast Cancer	Breast Ductal Carcinoma	63	SIDM00314	#N/A	breast	breast_ductal_carcinoma	ERpos_HER2neg	luminal
34	ACH-000098	GAMG	GAMG	GAMG_CENTRAL_NERVOUS_SYSTEM	#N/A	906868	Female	DSMZ	2	-5.02631	Adherent	DMEM + 10% FBS + 2mM Glutamax	91.1	CVCL_1226	1174	central_nervous_system	Primary	Brain Cancer	Glioblastoma	42	SIDM01055	#N/A	central_nervous_system	glioma	glioblastoma	#N/A
35	ACH-000100	RH-41	RH41	RH41_SOFT_TISSUE	#N/A	1240210	Female	DSMZ	0	-2.89398	Adherent	RPMI + 10% FBS	75.2	CVCL_2176	2052	liver	Metastasis	Sarcoma	Rhabdomyosarcoma, alveolar	#N/A	SIDM00426	#N/A	soft_tissue	rhabdomyosarcoma	alveolar	#N/A
36	ACH-000109	NCI-H3255	NCIH3255	NCIH3255_LUNG	#N/A	#N/A	Female	Academic lab	#N/A	#N/A	#N/A	#N/A	#N/A	CVCL_6831	#N/A	lung	Primary	Lung Cancer	Non-Small Cell Lung Cancer (NSCLC), Adenocarcinoma	#N/A	SIDM00046	#N/A	lung	NSCLC	NSCLC_adenocarcinoma	#N/A
37	ACH-000111	HCC1187	HCC1187	HCC1187_BREAST	#N/A	749711	Female	ATCC	2	-2.76223	Mixed adherent and suspension	RPMI + 10% FBS	90.8	CVCL_1247	1644	breast	Primary	Breast Cancer	Breast Ductal Carcinoma	41	SIDM00885	#N/A	breast	breast_ductal_carcinoma	ERneg_HER2neg	basal_A
38	ACH-000114	SU.86.86	SU8686	SU8686_PANCREAS	#N/A	1240218	Female	ATCC	1	-3.97051	#N/A	RPMI + 10% FBS	89.8	CVCL_3881	268	liver	Metastasis	Pancreatic Cancer	Ductal Adenocarcinoma, exocrine	57	SIDM01188	#N/A	pancreas	exocrine	exocrine_adenocarcinoma	#N/A
39	ACH-000115	VCaP	VCAP	VCAP_PROSTATE	#N/A	1299075	Male	ATCC	2	-2.86809	Adherent	DMEM+10 %FBS	54.2	CVCL_2235	2154	bone	Metastasis	Prostate Cancer	Adenocarcinoma	59	SIDM01077	#N/A	prostate	prostate_adenocarcinoma	#N/A	#N/A
40	ACH-000117	EFM-192A	EFM192A	EFM192A_BREAST	#N/A	1290798	Female	DSMZ	#N/A	#N/A	#N/A	#N/A	#N/A	CVCL_1812	1187	pleural_effusion	Metastasis	Breast Cancer	Adenocarcinoma	46	SIDM01002	#N/A	breast	breast_adenocarcinoma	ERpos_HER2pos	HER2_amp
41	ACH-000118	HUP-T3	HUPT3	HUPT3_PANCREAS	#N/A	907285	Male	DSMZ	4	-4.52154	Adherent	MEM + 10% FBS	70.2	CVCL_1299	109	ascites	Metastasis	Pancreatic Cancer	Ductal Adenocarcinoma, exocrine	66	SIDM00533	#N/A	pancreas	exocrine	exocrine_adenocarcinoma	#N/A
42	ACH-000132	JHOS-2	JHOS2	JHOS2_OVARY	#N/A	1479995	Female	RIKEN	1	-4.49849	#N/A	DMEM:F12 (1:1) + 10% FBS	83.8	CVCL_4647	436	ovary	Primary	Ovarian Cancer	Adenocarcinoma, high grade serous	45	SIDM00305	#N/A	ovary	ovary_adenocarcinoma	high_grade_serous	#N/A
43	ACH-000138	CFPAC-1	CFPAC1	CFPAC1_PANCREAS	#N/A	906821	Male	ATCC	3	-3.74821	Mixed adherent and suspension	DMEM + 10% FBS	67.1	CVCL_1119	572	liver	Metastasis	Pancreatic Cancer	Ductal Adenocarcinoma, exocrine	26	SIDM00130	#N/A	pancreas	exocrine	exocrine_adenocarcinoma	#N/A
44	ACH-000146	THP-1	THP1	THP1_HAEMATOPOIETIC_AND_LYMPHOID_TISSUE	#N/A	909771	Male	ATCC	3	-5.01403	Suspension	RPMI + 10% FBS + 0.5mM BME	65.6	CVCL_0006	770	haematopoietic_and_lymphoid_tissue	Primary	Leukemia	Acute Myelogenous Leukemia (AML), M5 (Eosinophilic/Monocytic)	1	SIDM01172	#N/A	blood	AML	M5	#N/A
45	ACH-000147	T-47D	T47D	T47D_BREAST	#N/A	905945	Female	ATCC	2	-4.80474	Adherent	RPMI + 10% FBS + 2ug/ml Insulin	68	CVCL_0553	1286	pleural_effusion	Metastasis	Breast Cancer	Breast Ductal Carcinoma	54	SIDM00097	#N/A	breast	breast_ductal_carcinoma	ERpos_HER2neg	luminal
46	ACH-000151	JM1	JM1	JM1_HAEMATOPOIETIC_AND_LYMPHOID_TISSUE	#N/A	1327768	Male	ATCC	2	-2.4896	Suspension	IMDM + 10% FBS	67	CVCL_3532	2096	haematopoietic_and_lymphoid_tissue	#N/A	Leukemia	Acute Lymphoblastic Leukemia (ALL), B-cell	#N/A	SIDM00689	#N/A	blood	ALL	b_cell	#N/A
47	ACH-000153	NCI-H2052	NCIH2052	NCIH2052_PLEURA	#N/A	688058	Male	ATCC	1	-2.70454	Adherent	RPMI + 10% FBS	69.5	CVCL_1518	1485	pleural_effusion	Metastasis	Lung Cancer	Mesothelioma	65	SIDM00713	#N/A	lung	mesothelioma	#N/A	#N/A
48	ACH-000155	SW 1990	SW1990	SW1990_PANCREAS	#N/A	910907	Male	ATCC	#N/A	#N/A	#N/A	#N/A	#N/A	CVCL_1723	1912	spleen	Primary	Pancreatic Cancer	Ductal Adenocarcinoma, exocrine	56	SIDM01165	#N/A	pancreas	exocrine	exocrine_adenocarcinoma	#N/A
49	ACH-000158	OCI-LY3	OCILY3	OCILY3_HAEMATOPOIETIC_AND_LYMPHOID_TISSUE	#N/A	#N/A	Male	Academic lab	#N/A	#N/A	#N/A	#N/A	#N/A	CVCL_8800	#N/A	bone_marrow	Primary	Lymphoma	Diffuse Large B-cell Lymphoma (DLBCL)	#N/A	#N/A	#N/A	lymphocyte	non_hodgkin_lymphoma	DLBCL	#N/A
50	ACH-000159	OS-RC-2	OSRC2	OSRC2_KIDNEY	#N/A	909250	Male	RIKEN	2	-4.23849	#N/A	RPMI + 10% FBS	80.6	CVCL_1626	1674	kidney	Primary	Kidney Cancer	Renal Cell Carcinoma	#N/A	SIDM00239	#N/A	kidney	renal_cell_carcinoma	#N/A	#N/A
51	ACH-000161	COR-L105	CORL105	CORL105_LUNG	#N/A	906805	Male	ECACC	1	-3.18806	Adherent	RPMI 1640 + 15% FBS + 1% L-glutamine	85.4	CVCL_1138	22	pleural_effusion	Metastasis	Lung Cancer	Non-Small Cell Lung Cancer (NSCLC), Adenocarcinoma	#N/A	SIDM00513	#N/A	lung	NSCLC	NSCLC_adenocarcinoma	#N/A
52	ACH-000164	PANC-1	PANC1	PANC1_PANCREAS	#N/A	#N/A	Male	ATCC	2	-4.71034	Adherent	DMEM + 10% FBS	96.4	CVCL_0480	#N/A	pancreas	Primary	Pancreatic Cancer	Ductal Adenocarcinoma, exocrine	#N/A	SIDM00610	#N/A	pancreas	exocrine	exocrine_adenocarcinoma	#N/A
53	ACH-000169	RD	RD	RD_SOFT_TISSUE	#N/A	909264	Female	ATCC	2	-4.69379	Adherent	DMEM + 10% FBS	81.1	CVCL_1649	1763	soft_tissue	Primary	Sarcoma	Rhabdomyosarcoma, embryonal	7	SIDM00847	#N/A	soft_tissue	rhabdomyosarcoma	embryonal	#N/A
54	ACH-000188	SCC-25	SCC25	SCC25_UPPER_AERODIGESTIVE_TRACT	#N/A	910701	Male	ATCC	2	-3.55165	Adherent	DMEM:F12 (1:1) + 10% FBS + 0.4ug/ml Hydrocortisone	90.7	CVCL_1682	1419	upper_aerodigestive_tract	Primary	Head and Neck Cancer	Squamous Cell Carcinoma	70	SIDM01082	#N/A	upper_aerodigestive	upper_aerodigestive_squamous	#N/A	#N/A
55	ACH-000190	HD-MY-Z	HDMYZ	HDMYZ_HAEMATOPOIETIC_AND_LYMPHOID_TISSUE	#N/A	907050	Male	DSMZ	2	-3.0162	#N/A	RPMI + 10% heat inactivated FBS	78.4	CVCL_1273	883	pleural_effusion	#N/A	Lymphoma	B-cell, Hodgkins	29	SIDM01063	#N/A	lymphocyte	hodgkin_lymphoma	#N/A	#N/A
56	ACH-000192	MFE-280	MFE280	MFE280_ENDOMETRIUM	#N/A	908129	Female	DSMZ	#N/A	#N/A	#N/A	#N/A	#N/A	CVCL_1405	1540	endometrium	Primary	Endometrial/Uterine Cancer	Endometrial Adenocarcinoma	77	SIDM00335	#N/A	uterus	endometrial_adenocarcinoma	#N/A	#N/A
57	ACH-000198	EOL-1	EOL1	EOL1_HAEMATOPOIETIC_AND_LYMPHOID_TISSUE	#N/A	906856	Male	DSMZ	2	-4.37441	#N/A	RPMI + 10% FBS	70.2	CVCL_0258	426	haematopoietic_and_lymphoid_tissue	#N/A	Leukemia	Acute Myelogenous Leukemia (AML), M5 (Eosinophilic/Monocytic)	33	SIDM00277	#N/A	blood	AML	M5	#N/A
58	ACH-000201	A-204	A204	A204_SOFT_TISSUE	#N/A	910784	Female	ATCC	#N/A	#N/A	#N/A	#N/A	#N/A	CVCL_1058	349	soft_tissue	Primary	Rhabdoid	Malignant Rhabdoid Tumor	1	SIDM00798	#N/A	soft_tissue	malignant_rhabdoid_tumor	#N/A	#N/A
59	ACH-000202	COLO-320	COLO320	COLO320_LARGE_INTESTINE	#N/A	#N/A	Female	DSMZ	3	-1.64143	Suspension	RPMI + 10% FBS	62.4	CVCL_1989	#N/A	large_intestine	Primary	Colon/Colorectal Cancer	Adenocarcinoma	55	SIDM00071	#N/A	colorectal	colorectal_adenocarcinoma	#N/A	#N/A
60	ACH-000207	Detroit 562	DETROIT562	DETROIT562_UPPER_AERODIGESTIVE_TRACT	#N/A	906837	Female	ATCC	2	-2.25698	#N/A	EMEM + 10% FBS	81.4	CVCL_1171	2075	pleural_effusion	Metastasis	Head and Neck Cancer	Squamous Cell Carcinoma, pharynx	#N/A	SIDM00831	#N/A	upper_aerodigestive	upper_aerodigestive_squamous	pharynx	#N/A
61	ACH-000209	SNU-1079	SNU1079	SNU1079_BILIARY_TRACT	#N/A	#N/A	Male	KCLB	2	-2.49771	#N/A	RPMI + 10% heat inactivated FBS + 300mg/l L-glutamine + 25mM HEPES + 25mM Sodium bicarbonate	74.3	CVCL_5008	#N/A	biliary_tract	#N/A	Bile Duct Cancer	Cholangiocarcinoma, intrahepatic	#N/A	SIDM00164	#N/A	bile_duct	cholangiocarcinoma	intrahepatic	#N/A
62	ACH-000211	Daoy	DAOY	DAOY_CENTRAL_NERVOUS_SYSTEM	#N/A	906833	Male	ATCC	2	-4.68543	Adherent	EMEM + 10% FBS	91.6	CVCL_1167	2150	central_nervous_system	Primary	Brain Cancer	Medulloblastoma	4	SIDM00887	#N/A	central_nervous_system	medulloblastoma	#N/A	non_MYC
63	ACH-000212	CAL-120	CAL120	CAL120_BREAST	#N/A	906826	Female	DSMZ	2	-4.0642	Adherent	DMEM + 10% FBS	80.2	CVCL_1104	1748	pleural_effusion	Metastasis	Breast Cancer	Carcinoma	43	SIDM00940	#N/A	breast	breast_carcinoma	ERneg_HER2neg	basal_B
64	ACH-000213	HUP-T4	HUPT4	HUPT4_PANCREAS	#N/A	907286	Male	DSMZ	#N/A	#N/A	#N/A	#N/A	#N/A	CVCL_1300	618	ascites	Metastasis	Pancreatic Cancer	Ductal Adenocarcinoma, exocrine	60	SIDM00531	#N/A	pancreas	exocrine	exocrine_adenocarcinoma	#N/A
65	ACH-000217	JHH-6	JHH6	JHH6_LIVER	#N/A	1240159	Female	HSRRB	2	-4.97004	Adherent	William's E Medium + 10% FBS	90.7	CVCL_2788	1824	liver	Primary	Liver Cancer	Hepatocellular Carcinoma	57	SIDM00615	#N/A	liver	hepatocellular_carcinoma	#N/A	#N/A
66	ACH-000219	A-375	A375	A375_SKIN	#N/A	906793	Female	ATCC	2	-4.14102	Adherent	DMEM + 10% FBS	90.4	CVCL_0132	953	skin	Primary	Skin Cancer	Melanoma	54	SIDM00795	#N/A	skin	melanoma	#N/A	#N/A
67	ACH-000222	AsPC-1	ASPC1	ASPC1_PANCREAS	#N/A	910702	Female	ATCC	3	-2.6741	Adherent	RPMI + 10% FBS	42.8	CVCL_0152	59	ascites	Metastasis	Pancreatic Cancer	Ductal Adenocarcinoma, exocrine	62	SIDM00899	#N/A	pancreas	exocrine	exocrine_adenocarcinoma	#N/A
68	ACH-000223	HCC1937	HCC1937	HCC1937_BREAST	#N/A	749714	Female	ATCC	2	-5.06464	Adherent	RPMI + 10% FBS	87.5	CVCL_0290	936	breast	Primary	Breast Cancer	Breast Ductal Carcinoma	24	SIDM00874	#N/A	breast	breast_ductal_carcinoma	ERneg_HER2neg	basal_A
69	ACH-000234	Caki-2	CAKI2	CAKI2_KIDNEY	#N/A	#N/A	Male	ATCC	2	-2.95329	Adherent	McCoy's 5A + 10% FBS	55.5	CVCL_0235	#N/A	kidney	Primary	Kidney Cancer	Renal Carcinoma, clear cell	69	#N/A	#N/A	kidney	renal_cell_carcinoma	clear_cell	#N/A
70	ACH-000235	Panc 04.03	PANC0403	PANC0403_PANCREAS	#N/A	1298476	Male	ATCC	4	-5.39401	Adherent	RPMI + 15% FBS + 20ug/ml Insulin	83.1	CVCL_1636	2123	pancreas	Primary	Pancreatic Cancer	Ductal Adenocarcinoma, exocrine	70	SIDM01137	#N/A	pancreas	exocrine	exocrine_adenocarcinoma	#N/A
71	ACH-000236	SW1417	SW1417	SW1417_LARGE_INTESTINE	#N/A	909747	Female	ATCC	#N/A	#N/A	#N/A	#N/A	#N/A	CVCL_1717	974	Colon	Primary	Colon/Colorectal Cancer	Adenocarcinoma	53	SIDM00812	#N/A	colorectal	colorectal_adenocarcinoma	#N/A	#N/A
72	ACH-000239	HuG1-N	HUG1N	HUG1N_STOMACH	#N/A	#N/A	Male	RIKEN	0	-1.07371	#N/A	RPMI + 10% FBS	80.8	CVCL_4846	#N/A	stomach	Metastasis	Gastric Cancer	Adenocarcinoma, tubular	55	#N/A	#N/A	gastric	gastric_adenocarcinoma	tubular	#N/A
73	ACH-000242	RT4	RT4	RT4_URINARY_TRACT	#N/A	687455	Male	ATCC	0	-1.31895	Adherent	McCoy's 5A + 10% FBS	41.9	CVCL_0036	1309	urinary_tract	Primary	Bladder Cancer	Transitional Cell Carcinoma	63	SIDM01085	#N/A	urinary_tract	bladder_carcinoma	bladder_transitional_cell	#N/A
74	ACH-000243	DAN-G	DANG	DANG_PANCREAS	#N/A	1290797	Female	DSMZ	4	-4.72455	Adherent	RPMI + 10% FBS	88.5	CVCL_0243	871	pancreas	#N/A	Pancreatic Cancer	Ductal Adenocarcinoma, exocrine	#N/A	SIDM00950	#N/A	pancreas	exocrine	exocrine_adenocarcinoma	#N/A
75	ACH-000247	OCUM-1	OCUM1	OCUM1_STOMACH	#N/A	1298358	Female	HSRRB	2	-3.15758	#N/A	DMEM + 10% FBS	84.5	CVCL_3084	1712	stomach	Metastasis	Gastric Cancer	Adenocarcinoma	38	SIDM00568	#N/A	gastric	gastric_adenocarcinoma	diffuse_gastric	#N/A
76	ACH-000248	AU565	AU565	AU565_BREAST	#N/A	910704	Female	ATCC	2	-2.85514	Adherent	DMEM + 10% FBS	63.8	CVCL_1074	726	pleural_effusion	Metastasis	Breast Cancer	Adenocarcinoma	43	SIDM00898	#N/A	breast	breast_adenocarcinoma	ERneg_HER2pos	HER2_amp
77	ACH-000250	KMRC-20	KMRC20	KMRC20_KIDNEY	#N/A	1298169	Unknown	HSRRB	2	-4.98923	Adherent	RPMI + 10% FBS	84.8	CVCL_2986	1515	kidney	Primary	Kidney Cancer	Renal Cell Carcinoma	#N/A	SIDM00609	#N/A	kidney	renal_cell_carcinoma	#N/A	#N/A
78	ACH-000255	LMSU	LMSU	LMSU_STOMACH	#N/A	#N/A	Female	RIKEN	2	-3.48771	#N/A	F12 + 10% FBS	86.2	CVCL_4849	#N/A	lymph_node	Metastasis	Gastric Cancer	Adenocarcinoma	27	#N/A	#N/A	gastric	gastric_adenocarcinoma	#N/A	#N/A
79	ACH-000260	SK-N-AS	SKNAS	SKNAS_AUTONOMIC_GANGLIA	#N/A	724828	Female	ATCC	3	-5.61035	Adherent	DMEM + 10% FBS + NEAA	83.8	CVCL_1700	1480	bone_marrow	Metastasis	Neuroblastoma	#N/A	6	SIDM01101	#N/A	peripheral_nervous_system	neuroblastoma	#N/A	#N/A
80	ACH-000263	KASUMI-1	KASUMI1	KASUMI1_HAEMATOPOIETIC_AND_LYMPHOID_TISSUE	#N/A	907275	Male	DSMZ	2	-1.89045	#N/A	RPMI + 10% FBS	54.7	CVCL_0589	1196	haematopoietic_and_lymphoid_tissue	Primary	Leukemia	Acute Myelogenous Leukemia (AML), M2 (Myeloblastic)	7	SIDM01005	#N/A	blood	AML	M2	#N/A
81	ACH-000264	Calu-6	CALU6	CALU6_LUNG	#N/A	724859	Female	ATCC	2	-5.60367	Adherent	EMEM + 10% FBS	91.9	CVCL_0236	1844	pleural_effusion	Metastasis	Lung Cancer	Non-Small Cell Lung Cancer (NSCLC), unspecified	61	SIDM00921	#N/A	lung	NSCLC	#N/A	#N/A
82	ACH-000265	KP4	KP4	KP4_PANCREAS	#N/A	753572	Male	RIKEN	4	-3.87324	Adherent	DMEM:F12 (1:1) + 10% FBS	88.3	CVCL_1338	708	ascites	Metastasis	Pancreatic Cancer	Ductal Adenocarcinoma, exocrine	50	SIDM00301	#N/A	pancreas	exocrine	exocrine_adenocarcinoma	#N/A
83	ACH-000276	HCC38	HCC38	HCC38_BREAST	#N/A	749717	Female	ATCC	1	-3.26708	Adherent	Waymouth's MB 752/1 + 10% FBS	60.8	CVCL_1267	1318	breast	Primary	Breast Cancer	Breast Ductal Carcinoma	50	SIDM00675	#N/A	breast	breast_ductal_carcinoma	ERneg_HER2neg	basal_A
84	ACH-000278	COV362	COV362	COV362_OVARY	#N/A	#N/A	Female	ECACC	3	-3.26175	Adherent	DMEM + 10% FBS + 2mM L-glutamine	83.5	CVCL_2420	#N/A	pleural_effusion	Metastasis	Ovarian Cancer	Adenocarcinoma, high grade serous	#N/A	#N/A	#N/A	ovary	ovary_adenocarcinoma	high_grade_serous	#N/A
85	ACH-000281	KP-2	KP2	KP2_PANCREAS	#N/A	1298218	Female	HSRRB	3	-2.43505	#N/A	RPMI + 10% FBS	85	CVCL_3004	746	pancreas	Primary	Pancreatic Cancer	Ductal Adenocarcinoma, exocrine	65	SIDM00582	#N/A	pancreas	exocrine	exocrine_adenocarcinoma	#N/A
86	ACH-000288	BT-549	BT549	BT549_BREAST	#N/A	905951	Female	ATCC	3	-4.53199	Adherent	RPMI + 10% heat inactivated FBS	77.4	CVCL_1092	1835	breast	Primary	Breast Cancer	Breast Ductal Carcinoma	72	SIDM00122	#N/A	breast	breast_ductal_carcinoma	ERneg_HER2neg	basal_B
87	ACH-000291	OV-90	OV90	OV90_OVARY	#N/A	1240197	Female	ATCC	2	-4.76328	Adherent	MCDB 105:Medium 199 (1:1) + 10% FBS + 1.5g/l Sodium bicarbonate	87.6	CVCL_3768	1327	ascites	Metastasis	Ovarian Cancer	Adenocarcinoma, high grade serous	64	SIDM01141	#N/A	ovary	ovary_adenocarcinoma	high_grade_serous	#N/A
88	ACH-000304	WM-115	WM115	WM115_SKIN	#N/A	909784	Female	ATCC	2	-2.36871	Adherent	EMEM + 10% FBS	48.3	CVCL_0040	1000	skin	Metastasis	Skin Cancer	Melanoma	59	SIDM01000	#N/A	skin	melanoma	#N/A	#N/A
89	ACH-000309	SK-LU-1	SKLU1	SKLU1_LUNG	#N/A	909721	Female	ATCC	#N/A	#N/A	#N/A	#N/A	#N/A	CVCL_0629	233	lung	Primary	Lung Cancer	Non-Small Cell Lung Cancer (NSCLC), Adenocarcinoma	60	SIDM01108	#N/A	lung	NSCLC	NSCLC_adenocarcinoma	#N/A
90	ACH-000311	NCI-H2122	NCIH2122	NCIH2122_LUNG	#N/A	722046	Female	ATCC	4	-3.06037	Suspension	RPMI + 10% FBS	68.9	CVCL_1531	1015	pleural_effusion	Metastasis	Lung Cancer	Non-Small Cell Lung Cancer (NSCLC), Adenocarcinoma	46	SIDM00702	#N/A	lung	NSCLC	NSCLC_adenocarcinoma	#N/A
91	ACH-000315	KARPAS-422	KARPAS422	KARPAS422_HAEMATOPOIETIC_AND_LYMPHOID_TISSUE	#N/A	907274	Female	DSMZ	2	-2.76418	#N/A	RPMI + 20% FBS	76.6	CVCL_1325	1973	pleural_effusion	Metastasis	Lymphoma	Diffuse Large B-cell Lymphoma (DLBCL)	73	SIDM01008	#N/A	lymphocyte	non_hodgkin_lymphoma	DLBCL	#N/A
92	ACH-000318	TE-10	TE10	TE10_OESOPHAGUS	#N/A	753622	Male	RIKEN	2	-3.47154	#N/A	DMEM + 10% FBS	90.1	CVCL_1760	1561	oesophagus	Primary	Esophageal Cancer	Squamous Cell Carcinoma	#N/A	SIDM00349	#N/A	esophagus	esophagus_squamous	#N/A	#N/A
93	ACH-000330	EFM-19	EFM19	EFM19_BREAST	#N/A	906851	Female	DSMZ	2	-2.87909	#N/A	RPMI + 10% FBS	68	CVCL_0253	1786	pleural_effusion	Metastasis	Breast Cancer	Breast Ductal Carcinoma	50	SIDM01056	#N/A	breast	breast_ductal_carcinoma	ERpos_HER2neg	luminal
94	ACH-000335	MSTO-211H	MSTO211H	MSTO211H_PLEURA	#N/A	908152	Male	ATCC	2	-2.29939	Adherent	RPMI + 10% FBS	80.5	CVCL_1430	209	pleural_effusion	Metastasis	Lung Cancer	Mesothelioma	62	SIDM00640	#N/A	lung	mesothelioma	#N/A	#N/A
95	ACH-000343	NCI-H522	NCIH522	NCIH522_LUNG	#N/A	905944	Male	ATCC	2	-3.96372	#N/A	RPMI + 10% FBS	73.3	CVCL_1567	1224	lung	Primary	Lung Cancer	Non-Small Cell Lung Cancer (NSCLC), Adenocarcinoma	60	SIDM00116	#N/A	lung	NSCLC	NSCLC_adenocarcinoma	#N/A
96	ACH-000347	QGP-1	QGP1	QGP1_PANCREAS	#N/A	1298534	Male	HSRRB	0	-0.590327	Adherent	RPMI + 10% FBS	50.2	CVCL_3143	469	pancreas	Primary	Pancreatic Cancer	Somatostatinoma	61	SIDM00360	#N/A	pancreas	endocrine	somatostatinoma	#N/A
97	ACH-000348	RPMI-7951	RPMI7951	RPMI7951_SKIN	#N/A	910903	Female	ATCC	2	-6.1356	Adherent	RPMI + 10% FBS	81.2	CVCL_1666	1909	lymph_node	Metastasis	Skin Cancer	Melanoma	18	SIDM01087	#N/A	skin	melanoma	#N/A	#N/A
98	ACH-000349	HCC1500	HCC1500	HCC1500_BREAST	#N/A	1303900	Female	ATCC	#N/A	#N/A	#N/A	#N/A	#N/A	CVCL_1254	653	breast	Primary	Breast Cancer	Breast Ductal Carcinoma	32	SIDM00879	#N/A	breast	breast_ductal_carcinoma	ERpos_HER2neg	luminal
99	ACH-000350	COLO-678	COLO678	COLO678_LARGE_INTESTINE	#N/A	910689	Male	DSMZ	3	-2.07828	Adherent	RPMI + 10% FBS	89.3	CVCL_1129	2148	lymph_node	Metastasis	Colon/Colorectal Cancer	Adenocarcinoma	69	SIDM00957	#N/A	colorectal	colorectal_adenocarcinoma	#N/A	#N/A
100	ACH-000351	MKN1	MKN1	MKN1_STOMACH	#N/A	908138	Male	HSRRB	#N/A	#N/A	#N/A	#N/A	#N/A	CVCL_1415	1647	lymph_node	Metastasis	Gastric Cancer	Adenocarcinoma	72	SIDM00271	#N/A	gastric	gastric_adenocarcinoma	#N/A	#N/A
101	ACH-000356	MKN-45	MKN45	MKN45_STOMACH	#N/A	925340	Female	HSRRB	2	-2.32997	#N/A	RPMI + 10% FBS	76.1	CVCL_0434	1542	liver	Metastasis	Gastric Cancer	Adenocarcinoma	62	SIDM00247	#N/A	gastric	gastric_adenocarcinoma	diffuse_gastric	#N/A
102	ACH-000357	JeKo-1	JEKO1	JEKO1_HAEMATOPOIETIC_AND_LYMPHOID_TISSUE	#N/A	1327765	Female	DSMZ	0	-0.817895	Suspension	RPMI + 20% FBS	60.3	CVCL_1865	2118	haematopoietic_and_lymphoid_tissue	#N/A	Lymphoma	B-cell, Non-Hodgkins, Mantle Cell	78	SIDM01038	#N/A	lymphocyte	non_hodgkin_lymphoma	b_cell_mantle_cell	#N/A
103	ACH-000361	SK-HEP-1	SKHEP1	SKHEP1_LIVER	#N/A	909719	Male	ATCC	2	-2.52661	Adherent	EMEM + 10% FBS	80.9	CVCL_0525	874	ascites	Metastasis	Liver Cancer	Hepatocellular Carcinoma	52	SIDM01110	#N/A	liver	hepatocellular_carcinoma	#N/A	#N/A
104	ACH-000362	MOLM-13	MOLM13	MOLM13_HAEMATOPOIETIC_AND_LYMPHOID_TISSUE	#N/A	1330947	Male	DSMZ	3	-3.1529	Suspension	RPMI + 20% FBS	#N/A	CVCL_2119	747	haematopoietic_and_lymphoid_tissue	Primary	Leukemia	Acute Myelogenous Leukemia (AML)	20	SIDM00437	#N/A	blood	AML	#N/A	#N/A
105	ACH-000364	U-2 OS	U2OS	U2OS_BONE	U2-OS, U-2 OS	909776	Female	ATCC	2	-3.88718	Adherent	McCoy's 5A + 10% FBS	47.4	CVCL_0042	1145	bone	Primary	Bone Cancer	Osteosarcoma	15	SIDM01191	#N/A	bone	osteosarcoma	#N/A	#N/A
106	ACH-000365	SU-DHL-4	SUDHL4	SUDHL4_HAEMATOPOIETIC_AND_LYMPHOID_TISSUE	#N/A	1331035	Male	DSMZ	2	-3.5927	Suspension	RPMI + 20% FBS	73.1	CVCL_0539	1450	pleural_effusion	Metastasis	Lymphoma	Diffuse Large B-cell Lymphoma (DLBCL)	38	SIDM00405	#N/A	lymphocyte	non_hodgkin_lymphoma	DLBCL	#N/A
107	ACH-000367	NCI-H226	NCIH226	NCIH226_LUNG	#N/A	905941	Male	ATCC	#N/A	#N/A	#N/A	#N/A	#N/A	CVCL_1544	1221	pleural_effusion	Metastasis	Lung Cancer	Non-Small Cell Lung Cancer (NSCLC), Squamous Cell Carcinoma	#N/A	SIDM00139	#N/A	lung	NSCLC	NSCLC_squamous	#N/A
108	ACH-000368	SNU-1105	SNU1105	SNU1105_CENTRAL_NERVOUS_SYSTEM	#N/A	#N/A	Male	KCLB	2	-3.5602	#N/A	RPMI + 10% FBS	72.6	CVCL_5010	#N/A	central_nervous_system	Primary	Brain Cancer	Glioblastoma	61	#N/A	#N/A	central_nervous_system	glioma	glioblastoma	#N/A
109	ACH-000369	MOLM-16	MOLM16	MOLM16_HAEMATOPOIETIC_AND_LYMPHOID_TISSUE	#N/A	1330948	Female	DSMZ	#N/A	#N/A	#N/A	#N/A	#N/A	CVCL_2120	1229	haematopoietic_and_lymphoid_tissue	#N/A	Leukemia	Acute Myelogenous Leukemia (AML)	77	SIDM00435	#N/A	blood	AML	#N/A	#N/A
110	ACH-000371	RL	RL	RL_HAEMATOPOIETIC_AND_LYMPHOID_TISSUE	#N/A	910861	Male	ATCC	2	-3.89603	Suspension	RPMI + 20% FBS	73	CVCL_1660	1273	ascites	#N/A	Lymphoma	B-cell, Non-Hodgkins	52	SIDM01089	#N/A	lymphocyte	non_hodgkin_lymphoma	b_cell	#N/A
111	ACH-000374	HCC1143	HCC1143	HCC1143_BREAST	#N/A	749710	Female	ATCC	2	-3.48995	Adherent	RPMI + 10% FBS	84	CVCL_1245	1316	breast	Primary	Breast Cancer	Breast Ductal Carcinoma	52	SIDM00866	#N/A	breast	breast_ductal_carcinoma	ERneg_HER2neg	basal_A
112	ACH-000375	G-402	G402	G402_SOFT_TISSUE	#N/A	907298	Female	ATCC	2	-3.28102	#N/A	McCoy's 5A + 10% FBS	81.1	CVCL_1221	1089	kidney	Primary	Kidney Cancer	Renal Leiomyoblastoma	0.75	SIDM00855	#N/A	soft_tissue	malignant_rhabdoid_tumor	renal_leiomyoblastoma	#N/A
113	ACH-000376	SF-295	SF295	SF295_CENTRAL_NERVOUS_SYSTEM	#N/A	905985	Female	NCI/DCTD	2	-5.90409	Adherent	RPMI + 10% FBS	79.1	CVCL_1690	1164	central_nervous_system	Primary	Brain Cancer	Glioblastoma	67	SIDM00084	#N/A	central_nervous_system	glioma	glioblastoma	#N/A
114	ACH-000378	NCI-H647	NCIH647	NCIH647_LUNG	#N/A	1240191	Male	ATCC	2	-3.10215	Adherent	RPMI + 10% FBS	89	CVCL_1574	955	pleural_effusion	Metastasis	Lung Cancer	Non-Small Cell Lung Cancer (NSCLC), Adenosquamous Carcinoma	56	SIDM01125	#N/A	lung	NSCLC	NSCLC_adenosquamous	#N/A
115	ACH-000380	KMS-12-BM	KMS12BM	KMS12BM_HAEMATOPOIETIC_AND_LYMPHOID_TISSUE	#N/A	907281	Female	DSMZ	0	-0.19561	Suspension	RPMI + 20% FBS	97.2	CVCL_1334	2087	bone_marrow	Primary	Myeloma	Multiple Myeloma	64	SIDM01020	#N/A	plasma_cell	multiple_myeloma	#N/A	#N/A
116	ACH-000383	OE33	OE33	OE33_OESOPHAGUS	#N/A	910549	Female	HPACC	2	-3.50742	Adherent	RPMI + 10% FBS	89.6	CVCL_0471	1554	oesophagus	Primary	Esophageal Cancer	Adenocarcinoma	73	SIDM00477	#N/A	esophagus	esophagus_adenocarcinoma	#N/A	#N/A
117	ACH-000387	TF-1	TF1	TF1_HAEMATOPOIETIC_AND_LYMPHOID_TISSUE	#N/A	#N/A	Male	ATCC	3	-4.46828	Suspension	RPMI + 10% FBS + 2ng/ml GM-CSF	#N/A	CVCL_0559	#N/A	bone_marrow	#N/A	Leukemia	Acute Myelogenous Leukemia (AML)	35	#N/A	#N/A	blood	AML	#N/A	#N/A
118	ACH-000388	NU-DHL-1	NUDHL1	NUDHL1_HAEMATOPOIETIC_AND_LYMPHOID_TISSUE	#N/A	#N/A	Male	DSMZ	#N/A	#N/A	#N/A	#N/A	#N/A	CVCL_1876	#N/A	lymph_node	Metastasis	Lymphoma	Diffuse Large B-cell Lymphoma (DLBCL)	73	#N/A	#N/A	lymphocyte	non_hodgkin_lymphoma	DLBCL	#N/A
119	ACH-000390	LUDLU-1	LUDLU1	LUDLU1_LUNG	#N/A	#N/A	Male	ECACC	2	-3.98197	Adherent	RPMI + 10% FBS	86.8	CVCL_2582	#N/A	lung	Primary	Lung Cancer	Non-Small Cell Lung Cancer (NSCLC), Squamous Cell Carcinoma	72	#N/A	#N/A	lung	NSCLC	NSCLC_squamous	#N/A
120	ACH-000393	HLF	HLF	HLF_LIVER	#N/A	#N/A	Male	HSRRB	2	-3.81343	Adherent	EMEM + 10% FBS	#N/A	CVCL_2947	#N/A	liver	Primary	Liver Cancer	Hepatocellular Carcinoma	69	SIDM00065	#N/A	liver	hepatocellular_carcinoma	#N/A	#N/A
121	ACH-000395	NCI-H520	NCIH520	NCIH520_LUNG	#N/A	908443	Male	ATCC	3	-2.77735	Adherent	RPMI + 10% FBS	86.6	CVCL_1566	2200	lung	Primary	Lung Cancer	Non-Small Cell Lung Cancer (NSCLC), Squamous Cell Carcinoma	#N/A	SIDM01130	#N/A	lung	NSCLC	NSCLC_squamous	#N/A
122	ACH-000396	J82	J82	J82_URINARY_TRACT	#N/A	753566	Male	ATCC	0	-1.44866	Adherent	EMEM + 10% FBS	72.8	CVCL_0359	1232	urinary_tract	Primary	Bladder Cancer	Transitional Cell Carcinoma	58	SIDM00693	#N/A	urinary_tract	bladder_carcinoma	bladder_transitional_cell	#N/A
123	ACH-000400	SK-CO-1	SKCO1	SKCO1_LARGE_INTESTINE	#N/A	909718	Male	ATCC	#N/A	#N/A	#N/A	#N/A	#N/A	CVCL_0626	40	ascites	Metastasis	Colon/Colorectal Cancer	Adenocarcinoma	65	SIDM01096	#N/A	colorectal	colorectal_adenocarcinoma	#N/A	#N/A
124	ACH-000403	NCI-H747	NCIH747	NCIH747_LARGE_INTESTINE	#N/A	908457	Male	ATCC	3	-3.45121	Adherent	RPMI + 10% FBS	84.6	CVCL_1587	573	large_intestine	Metastasis	Colon/Colorectal Cancer	Adenocarcinoma	69	SIDM00778	#N/A	colorectal	colorectal_adenocarcinoma	#N/A	#N/A
125	ACH-000404	K029AX	K029AX	K029AX_SKIN	#N/A	#N/A	Unknown	Academic lab	1	-2.86178	#N/A	RPMI + 10% FBS	44.8	CVCL_8784	#N/A	skin	Primary	Skin Cancer	Melanoma	#N/A	#N/A	#N/A	skin	melanoma	#N/A	#N/A
126	ACH-000406	U-937	U937	U937_HAEMATOPOIETIC_AND_LYMPHOID_TISSUE	#N/A	#N/A	Male	ATCC	3	-6.26716	Suspension	RPMI + 10% FBS	76.1	CVCL_0007	#N/A	pleural_effusion	Metastasis	Leukemia	Acute Myelogenous Leukemia (AML)	37	SIDM01195	#N/A	blood	AML	#N/A	#N/A
127	ACH-000407	SNU-685	SNU685	SNU685_ENDOMETRIUM	#N/A	#N/A	Female	KCLB	2	-4.17513	#N/A	RPMI + 10% FBS	84.1	CVCL_5083	#N/A	endometrium	Primary	Endometrial/Uterine Cancer	Malignant Mixed Mullerian Tumor (MMMT)	70	SIDM00165	#N/A	uterus	MMMT	#N/A	#N/A
128	ACH-000409	OVSAHO	OVSAHO	OVSAHO_OVARY	#N/A	#N/A	Female	HSRRB	#N/A	#N/A	#N/A	#N/A	#N/A	CVCL_3114	#N/A	abdomen	Metastasis	Ovarian Cancer	Adenocarcinoma, high grade serous	56	#N/A	#N/A	ovary	ovary_adenocarcinoma	high_grade_serous	#N/A
129	ACH-000411	769-P	769P	769P_KIDNEY	#N/A	910922	Female	ATCC	2	-3.25579	Adherent	RPMI + 10% FBS	83.3	CVCL_1050	1186	kidney	Primary	Kidney Cancer	Renal Carcinoma, clear cell	63	SIDM00803	#N/A	kidney	renal_cell_carcinoma	clear_cell	#N/A
130	ACH-000414	NCI-H1944	NCIH1944	NCIH1944_LUNG	#N/A	1240185	Female	ATCC	4	-3.58719	Adherent	RPMI + 10% FBS	62.5	CVCL_1508	183	soft_tissue	Metastasis	Lung Cancer	Non-Small Cell Lung Cancer (NSCLC), Adenocarcinoma	62	SIDM00762	#N/A	lung	NSCLC	NSCLC_adenocarcinoma	#N/A
131	ACH-000415	BICR 6	BICR6	BICR6_UPPER_AERODIGESTIVE_TRACT	#N/A	#N/A	Male	ECACC	2	-3.89538	Adherent	DMEM + 10% FBS + 2mM Glutamine + 0.4ug/ml Hydrocortisone	89.4	CVCL_2314	#N/A	upper_aerodigestive_tract	Primary	Head and Neck Cancer	Squamous Cell Carcinoma, oral	#N/A	#N/A	#N/A	upper_aerodigestive	upper_aerodigestive_squamous	oral	#N/A
132	ACH-000416	NCI-H838	NCIH838	NCIH838_LUNG	#N/A	910399	Male	ATCC	2	-5.41871	Adherent	RPMI + 10% FBS	84.8	CVCL_1594	484	lymph_node	Metastasis	Lung Cancer	Non-Small Cell Lung Cancer (NSCLC), Adenocarcinoma	59	SIDM01150	#N/A	lung	NSCLC	NSCLC_adenocarcinoma	#N/A
133	ACH-000420	SNU-449	SNU449	SNU449_LIVER	#N/A	909738	Male	ATCC	2	-3.59253	Adherent	RPMI + 10% FBS	89.2	CVCL_0454	129	liver	Primary	Liver Cancer	Hepatocellular Carcinoma	52	SIDM01194	#N/A	liver	hepatocellular_carcinoma	#N/A	#N/A
134	ACH-000421	SW837	SW837	SW837_LARGE_INTESTINE	#N/A	909755	Male	ATCC	3	-4.68742	Adherent	RPMI + 10% FBS	90.1	CVCL_1729	1141	large_intestine	Primary	Colon/Colorectal Cancer	Adenocarcinoma	53	SIDM00833	#N/A	colorectal	colorectal_adenocarcinoma	#N/A	#N/A
135	ACH-000423	SK-MEL-3	SKMEL3	SKMEL3_SKIN	#N/A	909724	Female	ATCC	#N/A	#N/A	#N/A	#N/A	#N/A	CVCL_0550	1572	lymph_node	Metastasis	Skin Cancer	Melanoma	42	SIDM01105	#N/A	skin	melanoma	#N/A	#N/A
136	ACH-000424	TC-71	TC71	TC71_BONE	#N/A	1240221	Male	DSMZ	2	-2.40501	#N/A	IMDM + 10% FBS	57.4	CVCL_2213	2194	bone	Primary	Bone Cancer	Ewings Sarcoma	22	SIDM00419	#N/A	bone	Ewing_sarcoma	#N/A	#N/A
137	ACH-000425	UACC-62	UACC62	UACC62_SKIN	#N/A	905976	Unknown	NCI/DCTD	2	-4.47017	#N/A	RPMI + 10% FBS	73.1	CVCL_1780	8	skin	#N/A	Skin Cancer	Melanoma	#N/A	SIDM00107	#N/A	skin	melanoma	#N/A	#N/A
138	ACH-000427	NCI-N87	NCIN87	NCIN87_STOMACH	#N/A	908461	Male	ATCC	2	-1.90075	Adherent	RPMI + 10% FBS	50.8	CVCL_1603	88	liver	Metastasis	Gastric Cancer	Adenocarcinoma, tubular	#N/A	SIDM01147	#N/A	gastric	gastric_adenocarcinoma	tubular	#N/A
139	ACH-000429	A-704	A704	A704_KIDNEY	#N/A	910920	Male	ATCC	#N/A	#N/A	#N/A	#N/A	#N/A	CVCL_1065	949	kidney	Primary	Kidney Cancer	Renal Cell Carcinoma	78	SIDM00849	#N/A	kidney	renal_cell_carcinoma	#N/A	#N/A
140	ACH-000430	TYK-nu	TYKNU	TYKNU_OVARY	#N/A	909774	Female	HSRRB	#N/A	#N/A	#N/A	#N/A	#N/A	CVCL_1776	476	ovary	Primary	Ovarian Cancer	Adenocarcinoma, high grade serous	#N/A	SIDM00321	#N/A	ovary	ovary_adenocarcinoma	high_grade_serous	#N/A
141	ACH-000433	Caki-1	CAKI1	CAKI1_KIDNEY	#N/A	905963	Male	ATCC	2	-2.71998	Adherent	McCoy's 5A + 10% FBS	50.5	CVCL_0234	289	skin	Metastasis	Kidney Cancer	Renal Carcinoma, clear cell	49	SIDM00941	#N/A	kidney	renal_cell_carcinoma	clear_cell	#N/A
142	ACH-000438	#N/A	LU65	LU65_LUNG	#N/A	724863	Male	JCRB	2	-3.51867	#N/A	RPMI + 20% FBS	89	CVCL_1392	47	lung	Primary	Lung Cancer	Non-Small Cell Lung Cancer (NSCLC), Large Cell Carcinoma	64	SIDM00547	#N/A	lung	NSCLC	NSCLC_large_cell	#N/A
143	ACH-000441	SH-4	SH4	SH4_SKIN	#N/A	909713	Female	ATCC	2	-4.09916	Mixed adherent and suspension	DMEM + 10% FBS	47.4	CVCL_1692	1179	pleural_effusion	Metastasis	Skin Cancer	Melanoma	60	SIDM01079	#N/A	skin	melanoma	#N/A	#N/A
144	ACH-000442	RERF-LC-Sq1	RERFLCSQ1	RERFLCSQ1_LUNG	#N/A	1298538	Female	HSRRB	#N/A	#N/A	#N/A	#N/A	#N/A	CVCL_1656	449	lung	Primary	Lung Cancer	Non-Small Cell Lung Cancer (NSCLC), Squamous Cell Carcinoma	74	SIDM00354	#N/A	lung	NSCLC	NSCLC_squamous	#N/A
145	ACH-000447	NCI-H2228	NCIH2228	NCIH2228_LUNG	#N/A	687816	Female	ATCC	#N/A	#N/A	#N/A	#N/A	#N/A	CVCL_1543	1812	lung	Primary	Lung Cancer	Non-Small Cell Lung Cancer (NSCLC), Adenocarcinoma	#N/A	SIDM00729	#N/A	lung	NSCLC	NSCLC_adenocarcinoma	#N/A
146	ACH-000448	NCI-H1666	NCIH1666	NCIH1666_LUNG	#N/A	908473	Female	ATCC	2	-4.01919	Adherent	ACL4	94.2	CVCL_1485	958	pleural_effusion	Metastasis	Lung Cancer	Non-Small Cell Lung Cancer (NSCLC), Adenocarcinoma	50	SIDM00743	#N/A	lung	NSCLC	NSCLC_adenocarcinoma	#N/A
147	ACH-000454	HCC-95	HCC95	HCC95_LUNG	#N/A	#N/A	Male	KCLB	2	-2.98535	#N/A	RPMI + 10% FBS + 2 mM Glutamine	86.7	CVCL_5137	#N/A	pleural_effusion	Metastasis	Lung Cancer	Non-Small Cell Lung Cancer (NSCLC), Squamous Cell Carcinoma	65	#N/A	#N/A	lung	NSCLC	NSCLC_squamous	#N/A
148	ACH-000463	NCI-H460	NCIH460	NCIH460_LUNG	#N/A	905943	Male	ATCC	2	-3.17959	Adherent	RPMI + 10% FBS	83.1	CVCL_0459	2146	pleural_effusion	Metastasis	Lung Cancer	Non-Small Cell Lung Cancer (NSCLC), Large Cell Carcinoma	#N/A	SIDM00144	#N/A	lung	NSCLC	NSCLC_large_cell	#N/A
149	ACH-000467	HCC-56	HCC56	HCC56_LARGE_INTESTINE	#N/A	1290907	Unknown	HSRRB	3	-3.81932	#N/A	EMEM + 10% FBS	71.9	CVCL_2917	1036	large_intestine	#N/A	Colon/Colorectal Cancer	Adenocarcinoma	#N/A	SIDM00597	#N/A	colorectal	colorectal_adenocarcinoma	#N/A	#N/A
150	ACH-000473	RT-112	RT112	RT112_URINARY_TRACT	#N/A	909704	Female	DSMZ	2	-3.02518	Adherent	RPMI + 10% FBS	67.8	CVCL_1670	25	urinary_tract	Primary	Bladder Cancer	Transitional Cell Carcinoma	#N/A	SIDM00402	#N/A	urinary_tract	bladder_carcinoma	bladder_transitional_cell	#N/A
151	ACH-000475	huH-1	HUH1	HUH1_LIVER	#N/A	1298146	Male	HSRRB	2	-5.58089	Adherent	DMEM + 10% FBS	96.1	CVCL_2956	1855	liver	Primary	Liver Cancer	Hepatocellular Carcinoma, HBs-antigen carrier	53	SIDM00586	#N/A	liver	hepatocellular_carcinoma	hbs_antigen_carrier	#N/A
152	ACH-000476	JHH-4	JHH4	JHH4_LIVER	#N/A	1240158	Male	HSRRB	2	-3.60919	#N/A	EMEM + 10% FBS	54.4	CVCL_2787	931	liver	Primary	Liver Cancer	Hepatocellular Carcinoma	51	SIDM00616	#N/A	liver	hepatocellular_carcinoma	#N/A	#N/A
153	ACH-000479	KNS-81	KNS81	KNS81_CENTRAL_NERVOUS_SYSTEM	#N/A	#N/A	Male	HSRRB	0	-1.85423	#N/A	DMEM + 5% FBS	40	CVCL_2799	#N/A	central_nervous_system	Primary	Brain Cancer	Glioblastoma	65	SIDM00605	#N/A	central_nervous_system	glioma	glioblastoma	#N/A
154	ACH-000480	HuH-7	HUH7	HUH7_LIVER	#N/A	907071	Male	HSRRB	2	-3.86846	#N/A	DMEM + 10% FBS	52.1	CVCL_0336	2195	liver	Primary	Liver Cancer	Hepatocellular Carcinoma	57	SIDM00585	#N/A	liver	hepatocellular_carcinoma	#N/A	#N/A
155	ACH-000481	NCI-H2170	NCIH2170	NCIH2170_LUNG	#N/A	687815	Male	ATCC	3	-3.46615	Mixed adherent and suspension	RPMI + 10% FBS	85.6	CVCL_1535	1811	lung	Primary	Lung Cancer	Non-Small Cell Lung Cancer (NSCLC), Squamous Cell Carcinoma	#N/A	SIDM00716	#N/A	lung	NSCLC	NSCLC_squamous	#N/A
156	ACH-000484	VMRC-RCW	VMRCRCW	VMRCRCW_KIDNEY	#N/A	1240224	Male	RIKEN	1	-3.28875	Adherent	EMEM + 10% FBS	91.3	CVCL_1790	1459	kidney	Primary	Kidney Cancer	Renal Cell Carcinoma	#N/A	SIDM00318	#N/A	kidney	renal_cell_carcinoma	#N/A	#N/A
157	ACH-000486	KU-19-19	KU1919	KU1919_URINARY_TRACT	#N/A	907312	Male	DSMZ	2	-4.25624	Adherent	RPMI + 10% heat inactivated FBS	66.7	CVCL_1344	892	urinary_tract	#N/A	Bladder Cancer	Transitional Cell Carcinoma	76	SIDM01033	#N/A	urinary_tract	bladder_carcinoma	bladder_transitional_cell	#N/A
158	ACH-000487	F-36P	F36P	F36P_HAEMATOPOIETIC_AND_LYMPHOID_TISSUE	#N/A	#N/A	Male	DSMZ	2	-4.31822	Suspension	RPMI + 20% FBS + 10ng/ml GM-CSF	82.3	CVCL_2037	#N/A	pleural_effusion	Metastasis	Leukemia	Acute Myelogenous Leukemia (AML), M6 (Erythroleukemia)	68	#N/A	#N/A	blood	AML	M6	#N/A
159	ACH-000488	TE-11	TE11	TE11_OESOPHAGUS	#N/A	946354	Male	RIKEN	2	-4.85944	#N/A	RPMI + 10% FBS	94.9	CVCL_1761	2073	oesophagus	Primary	Esophageal Cancer	Squamous Cell Carcinoma	58	SIDM00348	#N/A	esophagus	esophagus_squamous	#N/A	#N/A
160	ACH-000491	NCI-H716	NCIH716	NCIH716_LARGE_INTESTINE	#N/A	908458	Male	ATCC	3	-2.70809	Adherent	RPMI + 10% FBS	92	CVCL_1581	649	ascites	Metastasis	Colon/Colorectal Cancer	Adenocarcinoma	33	SIDM00779	#N/A	colorectal	colorectal_adenocarcinoma	#N/A	#N/A
161	ACH-000493	SNU-423	SNU423	SNU423_LIVER	#N/A	909737	Male	ATCC	1	-3.24086	Adherent	RPMI + 10% FBS	83.3	CVCL_0366	481	liver	Primary	Liver Cancer	Hepatocellular Carcinoma	40	SIDM01199	#N/A	liver	hepatocellular_carcinoma	#N/A	#N/A
162	ACH-000495	TUHR4TKB	TUHR4TKB	TUHR4TKB_KIDNEY	#N/A	#N/A	Male	RIKEN	1	-3.3984	Adherent	DMEM + 10% FBS	77.2	CVCL_5957	#N/A	kidney	Primary	Kidney Cancer	Renal Cell Carcinoma	60	#N/A	#N/A	kidney	renal_cell_carcinoma	#N/A	#N/A
163	ACH-000496	NCI-H1792	NCIH1792	NCIH1792_LUNG	#N/A	724868	Male	ATCC	4	-4.26745	Adherent	RPMI + 10% FBS	85.7	CVCL_1495	2122	pleural_effusion	Metastasis	Lung Cancer	Non-Small Cell Lung Cancer (NSCLC), Adenocarcinoma	50	SIDM00771	#N/A	lung	NSCLC	NSCLC_adenocarcinoma	#N/A
164	ACH-000502	TCC-PAN2	TCCPAN2	TCCPAN2_PANCREAS	#N/A	#N/A	Female	HSRRB	3	-4.73301	Adherent	RPMI + 10% FBS	83.7	CVCL_3178	#N/A	ascites	Metastasis	Pancreatic Cancer	Ductal Adenocarcinoma, exocrine	68	#N/A	#N/A	pancreas	exocrine	exocrine_adenocarcinoma	#N/A
165	ACH-000506	NCI-H146	NCIH146	NCIH146_LUNG	#N/A	910899	Male	ATCC	#N/A	#N/A	#N/A	#N/A	#N/A	CVCL_1473	932	bone_marrow	Metastasis	Lung Cancer	Small Cell Lung Cancer (SCLC)	59	SIDM00698	#N/A	lung	SCLC	#N/A	#N/A
166	ACH-000508	COR-L88	CORL88	CORL88_LUNG	#N/A	906808	Male	ECACC	#N/A	#N/A	#N/A	#N/A	#N/A	CVCL_1141	774	pleural_effusion	Metastasis	Lung Cancer	Small Cell Lung Cancer (SCLC)	55	SIDM00506	#N/A	lung	SCLC	#N/A	#N/A
167	ACH-000510	NCI-H1299	NCIH1299	NCIH1299_LUNG	#N/A	724831	Male	ATCC	2	-5.20731	Adherent	RPMI + 10% FBS	64.8	CVCL_0060	1235	lymph_node	Metastasis	Lung Cancer	Non-Small Cell Lung Cancer (NSCLC), Large Cell Carcinoma	43	SIDM00649	#N/A	lung	NSCLC	NSCLC_large_cell	#N/A
168	ACH-000511	Calu-1	CALU1	CALU1_LUNG	#N/A	#N/A	Male	ATCC	2	-4.92311	Adherent	McCoy's 5A + 10% FBS	78.7	CVCL_0608	#N/A	pleura	Metastasis	Lung Cancer	Non-Small Cell Lung Cancer (NSCLC), Squamous Cell Carcinoma	47	#N/A	#N/A	lung	NSCLC	NSCLC_squamous	#N/A
169	ACH-000518	CAL-33	CAL33	CAL33_UPPER_AERODIGESTIVE_TRACT	#N/A	753541	Male	DSMZ	2	-3.46546	Adherent	DMEM + 10% FBS + 2 mM L-glutamine	85.7	CVCL_1108	2041	upper_aerodigestive_tract	Primary	Head and Neck Cancer	Squamous Cell Carcinoma, oral	69	SIDM00942	#N/A	upper_aerodigestive	upper_aerodigestive_squamous	oral	#N/A
170	ACH-000521	NCI-H2030	NCIH2030	NCIH2030_LUNG	#N/A	722045	Male	ATCC	3	-3.02662	Adherent	RPMI + 10% FBS	85.8	CVCL_1517	912	lymph_node	Metastasis	Lung Cancer	Non-Small Cell Lung Cancer (NSCLC), Adenocarcinoma	#N/A	SIDM00715	#N/A	lung	NSCLC	NSCLC_adenocarcinoma	#N/A
171	ACH-000522	UM-UC-3	UMUC3	UMUC3_URINARY_TRACT	#N/A	724838	Male	ATCC	2	-5.12986	Adherent	EMEM + 10% FBS	88.3	CVCL_1783	9	urinary_tract	Primary	Bladder Cancer	Transitional Cell Carcinoma	#N/A	SIDM01182	#N/A	urinary_tract	bladder_carcinoma	bladder_transitional_cell	#N/A
172	ACH-000524	KURAMOCHI	KURAMOCHI	KURAMOCHI_OVARY	#N/A	909975	Female	HSRRB	3	-5.85515	#N/A	RPMI + 10% FBS	52.1	CVCL_1345	854	ascites	Metastasis	Ovarian Cancer	Adenocarcinoma, high grade serous	#N/A	SIDM00554	#N/A	ovary	ovary_adenocarcinoma	high_grade_serous	#N/A
173	ACH-000528	ABC-1	ABC1	ABC1_LUNG	#N/A	906791	Male	HSRRB	3	-5.63657	Adherent	EMEM + 10% FBS	77.5	CVCL_1066	1557	pleural_effusion	Metastasis	Lung Cancer	Non-Small Cell Lung Cancer (NSCLC), Adenocarcinoma	47	SIDM00494	#N/A	lung	NSCLC	NSCLC_adenocarcinoma	#N/A
174	ACH-000530	DMS 114	DMS114	DMS114_LUNG	#N/A	687983	Male	ATCC	#N/A	#N/A	#N/A	#N/A	#N/A	CVCL_1174	1495	lung	Primary	Lung Cancer	Small Cell Lung Cancer (SCLC)	68	SIDM00865	#N/A	lung	SCLC	#N/A	#N/A
175	ACH-000532	SNU-61	SNU61	SNU61_LARGE_INTESTINE	#N/A	1660035	Male	KCLB	#N/A	#N/A	#N/A	#N/A	#N/A	CVCL_5078	151	liver	Metastasis	Colon/Colorectal Cancer	Adenocarcinoma	48	SIDM00194	#N/A	colorectal	colorectal_adenocarcinoma	#N/A	#N/A
176	ACH-000535	BxPC-3	BXPC3	BXPC3_PANCREAS	#N/A	906693	Female	ATCC	2	-4.19944	Adherent	RPMI + 10% FBS	81.6	CVCL_0186	1978	pancreas	Primary	Pancreatic Cancer	Ductal Adenocarcinoma, exocrine	61	SIDM00132	#N/A	pancreas	exocrine	exocrine_adenocarcinoma	#N/A
177	ACH-000536	BT-20	BT20	BT20_BREAST	#N/A	906801	Female	ATCC	#N/A	#N/A	#N/A	#N/A	#N/A	CVCL_0178	2264	breast	Primary	Breast Cancer	Breast Ductal Carcinoma	74	SIDM00893	#N/A	breast	breast_ductal_carcinoma	ERneg_HER2neg	basal_A
178	ACH-000542	Hey-A8	HEYA8	HEYA8_OVARY	#N/A	#N/A	Female	Academic lab	3	-3.5153	Adherent	RPMI + 10% FBS	92.9	CVCL_8878	#N/A	ascites	Metastasis	Ovarian Cancer	Adenocarcinoma, low grade serous	#N/A	SIDM01215	#N/A	ovary	ovary_adenocarcinoma	low_grade_serous	#N/A
179	ACH-000546	HSC-4	HSC4	HSC4_UPPER_AERODIGESTIVE_TRACT	#N/A	907062	Male	HSRRB	#N/A	#N/A	#N/A	#N/A	#N/A	CVCL_1289	99	upper_aerodigestive_tract	Metastasis	Head and Neck Cancer	Squamous Cell Carcinoma	64	SIDM00588	#N/A	upper_aerodigestive	upper_aerodigestive_squamous	#N/A	#N/A
180	ACH-000547	HT-1197	HT1197	HT1197_URINARY_TRACT	#N/A	907065	Male	ATCC	2	-2.86827	Adherent	EMEM + 10% FBS	72	CVCL_1291	1533	urinary_tract	Primary	Bladder Cancer	Carcinoma	44	SIDM00676	#N/A	urinary_tract	bladder_carcinoma	#N/A	#N/A
181	ACH-000550	IGR-39	IGR39	IGR39_SKIN	#N/A	#N/A	Male	DSMZ	2	-4.45387	Adherent	DMEM + 15% FBS	71.1	CVCL_2076	#N/A	skin	Primary	Skin Cancer	Melanoma	26	SIDM01065	#N/A	skin	melanoma	#N/A	#N/A
182	ACH-000551	K-562	K562	K562_HAEMATOPOIETIC_AND_LYMPHOID_TISSUE	#N/A	905940	Female	ATCC	2	-3.20871	Suspension	IMDM + 10% FBS	46.8	CVCL_0004	2098	pleural_effusion	Metastasis	Leukemia	Chronic Myelogenous Leukemia (CML), blast crisis	53	SIDM00791	#N/A	blood	CML	blast_crisis	#N/A
183	ACH-000552	HT-29	HT29	HT29_LARGE_INTESTINE	#N/A	905939	Female	ATCC	2	-4.44776	Adherent	McCoy's 5A + 10% FBS	85.2	CVCL_0320	1212	large_intestine	Primary	Colon/Colorectal Cancer	Adenocarcinoma	44	SIDM00136	#N/A	colorectal	colorectal_adenocarcinoma	#N/A	#N/A
184	ACH-000553	Sq-1	SQ1	SQ1_LUNG	#N/A	#N/A	Male	RIKEN	#N/A	#N/A	#N/A	#N/A	#N/A	CVCL_4900	#N/A	lung	Primary	Lung Cancer	Non-Small Cell Lung Cancer (NSCLC), Squamous Cell Carcinoma	#N/A	#N/A	#N/A	lung	NSCLC	NSCLC_squamous	#N/A
185	ACH-000555	A-498	A498	A498_KIDNEY	#N/A	905948	Male	ATCC	#N/A	#N/A	#N/A	#N/A	#N/A	CVCL_1056	602	kidney	Primary	Kidney Cancer	Renal Cell Carcinoma	52	SIDM00124	#N/A	kidney	renal_cell_carcinoma	#N/A	#N/A
186	ACH-000558	A-172	A172	A172_CENTRAL_NERVOUS_SYSTEM	#N/A	687563	Male	ATCC	#N/A	#N/A	#N/A	#N/A	#N/A	CVCL_0131	1777	central_nervous_system	Primary	Brain Cancer	Glioblastoma	53	SIDM00799	#N/A	central_nervous_system	glioma	glioblastoma	#N/A
187	ACH-000563	EBC-1	EBC1	EBC1_LUNG	#N/A	753554	Male	RIKEN	2	-2.4905	Adherent	EMEM + 10% FBS	76.3	CVCL_2891	1665	skin	Metastasis	Lung Cancer	Non-Small Cell Lung Cancer (NSCLC), Squamous Cell Carcinoma	69	SIDM00486	#N/A	lung	NSCLC	NSCLC_squamous	#N/A
188	ACH-000573	MDA-MB-436	MDAMB436	MDAMB436_BREAST	#N/A	1240172	Female	ATCC	3	-5.24267	Adherent	RPMI + 10% FBS + 16ug/ml Glutathione	52.7	CVCL_0623	927	pleural_effusion	Metastasis	Breast Cancer	Carcinoma	43	SIDM00629	#N/A	breast	breast_carcinoma	ERneg_HER2neg	basal_B
189	ACH-000574	FU-OV-1	FUOV1	FUOV1_OVARY	#N/A	1240129	Female	DSMZ	#N/A	#N/A	#N/A	#N/A	#N/A	CVCL_2047	2063	ovary	Primary	Ovarian Cancer	Adenocarcinoma, high grade serous	65	SIDM01040	#N/A	ovary	ovary_adenocarcinoma	high_grade_serous	#N/A
190	ACH-000576	KMS-27	KMS27	KMS27_HAEMATOPOIETIC_AND_LYMPHOID_TISSUE	#N/A	#N/A	Male	HSRRB	2	-2.71429	Suspension	RPMI + 10% FBS	89	CVCL_2993	#N/A	haematopoietic_and_lymphoid_tissue	Primary	Myeloma	Multiple Myeloma	52	#N/A	#N/A	plasma_cell	multiple_myeloma	#N/A	#N/A
191	ACH-000579	UACC-257	UACC257	UACC257_SKIN	#N/A	905977	Unknown	NCI/DCTD	1	-1.37348	#N/A	RPMI + 10% FBS	81.3	CVCL_1779	14	skin	Primary	Skin Cancer	Melanoma	#N/A	SIDM00108	#N/A	skin	melanoma	#N/A	#N/A
192	ACH-000580	C32	C32	C32_SKIN	#N/A	906830	Male	ATCC	2	-3.44219	Adherent	EMEM + 10% FBS + 0.1mM NEAA	66.1	CVCL_1097	2242	skin	Primary	Skin Cancer	Melanoma, amelanotic	53	SIDM00890	#N/A	skin	melanoma	amelanotic	#N/A
193	ACH-000582	COLO 741	COLO741	COLO741_SKIN	#N/A	#N/A	Female	ECACC	#N/A	#N/A	#N/A	#N/A	#N/A	CVCL_1133	#N/A	skin	Metastasis	Skin Cancer	Melanoma	69	#N/A	#N/A	skin	melanoma	#N/A	#N/A
194	ACH-000587	NCI-H1975	NCIH1975	NCIH1975_LUNG	#N/A	924244	Female	ATCC	2	-4.65411	Adherent	DMEM + 10% FBS	89.5	CVCL_1511	1403	lung	Primary	Lung Cancer	Non-Small Cell Lung Cancer (NSCLC), Adenocarcinoma	#N/A	SIDM00759	#N/A	lung	NSCLC	NSCLC_adenocarcinoma	#N/A
195	ACH-000589	NCI-H1437	NCIH1437	NCIH1437_LUNG	#N/A	687794	Male	ATCC	3	-4.63413	Adherent	RPMI + 10% FBS	90.8	CVCL_1472	800	pleural_effusion	Metastasis	Lung Cancer	Non-Small Cell Lung Cancer (NSCLC), Adenocarcinoma	60	SIDM00734	#N/A	lung	NSCLC	NSCLC_adenocarcinoma	#N/A
196	ACH-000595	LN-229	LN229	LN229_CENTRAL_NERVOUS_SYSTEM	#N/A	1240169	Female	ATCC	2	-5.63122	Adherent	DMEM + 5% FBS	90	CVCL_0393	1504	central_nervous_system	Primary	Brain Cancer	Glioblastoma	60	SIDM00684	#N/A	central_nervous_system	glioma	glioblastoma	#N/A
197	ACH-000601	MIA PaCa-2	MIAPACA2	MIAPACA2_PANCREAS	#N/A	724870	Male	ATCC	4	-5.42234	Adherent	DMEM + 10% FBS	88.3	CVCL_0428	1541	pancreas	Primary	Pancreatic Cancer	Ductal Adenocarcinoma, exocrine	65	SIDM00505	#N/A	pancreas	exocrine	exocrine_adenocarcinoma	#N/A
198	ACH-000605	TE-6	TE6	TE6_OESOPHAGUS	#N/A	946355	Male	RIKEN	2	-3.1378	Adherent	RPMI + 10% FBS	60	CVCL_1765	1642	oesophagus	#N/A	Esophageal Cancer	Squamous Cell Carcinoma	#N/A	SIDM00328	#N/A	esophagus	esophagus_squamous	#N/A	#N/A
199	ACH-000606	PE/CA-PJ34 (clone C12)	PECAPJ34CLONEC12	PECAPJ34CLONEC12_UPPER_AERODIGESTIVE_TRACT	#N/A	#N/A	Male	ECACC	2	-3.70638	Adherent	IMDM + 10% FBS + 2mM Glutamine	80.2	CVCL_2679	#N/A	upper_aerodigestive_tract	Primary	Head and Neck Cancer	Squamous Cell Carcinoma, basaloid	60	#N/A	#N/A	upper_aerodigestive	upper_aerodigestive_squamous	basaloid	#N/A
200	ACH-000607	KYM-1	KYM1	KYM1_SOFT_TISSUE	#N/A	1240166	Male	HSRRB	2	-3.13156	Mixed adherent and suspension	DMEM:F12 (1:1) + 10% FBS	47.3	CVCL_3007	1344	soft_tissue	Primary	Rhabdoid	Malignant Rhabdoid Tumor	1	SIDM00552	#N/A	soft_tissue	malignant_rhabdoid_tumor	#N/A	#N/A
201	ACH-000611	SU-DHL-6	SUDHL6	SUDHL6_HAEMATOPOIETIC_AND_LYMPHOID_TISSUE	#N/A	1331037	Male	DSMZ	#N/A	#N/A	#N/A	#N/A	#N/A	CVCL_2206	2036	ascites	Metastasis	Lymphoma	Diffuse Large B-cell Lymphoma (DLBCL)	43	SIDM00407	#N/A	lymphocyte	non_hodgkin_lymphoma	DLBCL	#N/A
202	ACH-000614	RVH-421	RVH421	RVH421_SKIN	#N/A	909706	Male	DSMZ	2	-3.14939	Adherent	RPMI + 10% FBS	51.8	CVCL_1672	1274	central_nervous_system	Metastasis	Skin Cancer	Melanoma	28	SIDM00401	#N/A	skin	melanoma	#N/A	#N/A
203	ACH-000615	SK-MEL-28	SKMEL28	SKMEL28_SKIN	#N/A	905954	Male	ATCC	#N/A	#N/A	#N/A	#N/A	#N/A	CVCL_0526	1499	skin	#N/A	Skin Cancer	Melanoma	51	SIDM00081	#N/A	skin	melanoma	#N/A	#N/A
204	ACH-000617	OVCAR-4	OVCAR4	OVCAR4_OVARY	#N/A	905990	Female	NCI/DCTD	#N/A	#N/A	#N/A	#N/A	#N/A	CVCL_1627	606	ascites	Metastasis	Ovarian Cancer	Adenocarcinoma, high grade serous	42	SIDM00092	#N/A	ovary	ovary_adenocarcinoma	high_grade_serous	#N/A
205	ACH-000620	JHH-1	JHH1	JHH1_LIVER	#N/A	1298151	Male	HSRRB	2	-4.67852	#N/A	William's E Medium + 10% FBS	62.7	CVCL_2785	89	liver	Primary	Liver Cancer	Hepatocellular Carcinoma	50	SIDM00618	#N/A	liver	hepatocellular_carcinoma	#N/A	#N/A
206	ACH-000621	MDA-MB-157	MDAMB157	MDAMB157_BREAST	#N/A	925338	Female	ATCC	3	-4.33525	Adherent	RPMI + 10% FBS	92	CVCL_0618	1796	pleural_effusion	Metastasis	Breast Cancer	Breast Ductal Carcinoma	44	SIDM00529	#N/A	breast	breast_ductal_carcinoma	ERneg_HER2neg	basal_B
207	ACH-000622	KNS-42	KNS42	KNS42_CENTRAL_NERVOUS_SYSTEM	#N/A	907282	Male	HSRRB	2	-3.12387	Adherent	EMEM + 5% FBS	61.9	CVCL_0378	1149	central_nervous_system	Primary	Brain Cancer	Glioblastoma	16	SIDM00607	#N/A	central_nervous_system	glioma	glioblastoma	#N/A
208	ACH-000624	HCC1806	HCC1806	HCC1806_BREAST	#N/A	907047	Female	ATCC	3	-5.85625	Adherent	RPMI + 10% FBS	97.4	CVCL_1258	1317	breast	Primary	Breast Cancer	Breast Ductal Carcinoma	60	SIDM00875	#N/A	breast	breast_ductal_carcinoma	ERneg_HER2neg	basal_A
209	ACH-000625	Hep 3B2.1-7	HEP3B217	HEP3B217_LIVER	#N/A	1240147	Male	ATCC	#N/A	#N/A	#N/A	#N/A	#N/A	CVCL_0326	1922	liver	Primary	Liver Cancer	Hepatocellular Carcinoma	8	SIDM00672	#N/A	liver	hepatocellular_carcinoma	#N/A	#N/A
210	ACH-000627	LCLC-103H	LCLC103H	LCLC103H_LUNG	#N/A	753586	Male	DSMZ	2	-4.44062	Adherent	RPMI + 10% FBS	93.6	CVCL_1375	1502	pleural_effusion	Metastasis	Lung Cancer	Non-Small Cell Lung Cancer (NSCLC), Large Cell Carcinoma	61	SIDM00345	#N/A	lung	NSCLC	NSCLC_large_cell	#N/A
211	ACH-000632	Hs 944.T	HS944T	HS944T_SKIN	#N/A	#N/A	Male	ATCC	2	-4.88225	Adherent	DMEM + 10% FBS	88.7	CVCL_1040	#N/A	skin	Metastasis	Skin Cancer	Melanoma	51	SIDM00063	#N/A	skin	melanoma	#N/A	#N/A
212	ACH-000635	SNU-119	SNU119	SNU119_OVARY	#N/A	#N/A	Female	KCLB	#N/A	#N/A	#N/A	#N/A	#N/A	CVCL_5014	#N/A	ascites	Metastasis	Ovarian Cancer	Cystadenocarcinoma, high grade serous	50	#N/A	#N/A	ovary	ovary_adenocarcinoma	high_grade_serous	#N/A
213	ACH-000638	NCI-H441	NCIH441	NCIH441_LUNG	#N/A	908460	Male	ATCC	4	-3.2011	Adherent	RPMI + 10% FBS	81	CVCL_1561	1815	pericardial_effusion	Metastasis	Lung Cancer	Non-Small Cell Lung Cancer (NSCLC), Adenocarcinoma	#N/A	SIDM00925	#N/A	lung	NSCLC	NSCLC_adenocarcinoma	#N/A
214	ACH-000641	CMK	CMK	CMK_HAEMATOPOIETIC_AND_LYMPHOID_TISSUE	#N/A	910566	Male	DSMZ	#N/A	#N/A	#N/A	#N/A	#N/A	CVCL_0216	734	haematopoietic_and_lymphoid_tissue	#N/A	Leukemia	Acute Myelogenous Leukemia (AML), M7 (Megakaryoblastic)	0.8	SIDM00959	#N/A	blood	AML	M7	#N/A
215	ACH-000643	HDQ-P1	HDQP1	HDQP1_BREAST	#N/A	1290922	Female	DSMZ	#N/A	#N/A	#N/A	#N/A	#N/A	CVCL_2067	743	breast	Primary	Breast Cancer	Breast Ductal Carcinoma	50	SIDM01062	#N/A	breast	breast_ductal_carcinoma	ERneg_HER2neg	basal_A
216	ACH-000644	COLO 829	COLO829	COLO829_SKIN	#N/A	687448	Male	ATCC	#N/A	#N/A	#N/A	#N/A	#N/A	CVCL_1137	430	skin	Primary	Skin Cancer	Melanoma	45	SIDM00909	#N/A	skin	melanoma	#N/A	#N/A
217	ACH-000647	TE-1	TE1	TE1_OESOPHAGUS	#N/A	753621	Male	JCRB	2	-4.83649	#N/A	RPMI + 10% FBS	91.5	CVCL_1759	1493	oesophagus	Primary	Esophageal Cancer	Squamous Cell Carcinoma	#N/A	SIDM00369	#N/A	esophagus	esophagus_squamous	#N/A	#N/A
218	ACH-000649	786-O	786O	786O_KIDNEY	#N/A	905947	Male	ATCC	3	-4.26909	Adherent	RPMI + 10% FBS	63.5	CVCL_1051	301	kidney	Primary	Kidney Cancer	Renal Carcinoma, clear cell	58	SIDM00125	#N/A	kidney	renal_cell_carcinoma	clear_cell	#N/A
219	ACH-000650	IGR-37	IGR37	IGR37_SKIN	#N/A	1240153	Male	DSMZ	#N/A	#N/A	#N/A	#N/A	#N/A	CVCL_2075	1535	lymph_node	Metastasis	Skin Cancer	Melanoma	26	SIDM01066	#N/A	skin	melanoma	#N/A	#N/A
220	ACH-000651	SW 620	SW620	SW620_LARGE_INTESTINE	#N/A	905962	Male	ATCC	3	-3.6073	#N/A	L15 + 10% FBS	92.7	CVCL_0547	3	lymph_node	Metastasis	Colon/Colorectal Cancer	Adenocarcinoma	51	SIDM00841	#N/A	colorectal	colorectal_adenocarcinoma	#N/A	#N/A
221	ACH-000652	SUIT-2	SUIT2	SUIT2_PANCREAS	#N/A	1240219	Male	HSRRB	2	-3.31301	Adherent	RPMI + 10% FBS	75.4	CVCL_3172	1749	liver	Metastasis	Pancreatic Cancer	Ductal Adenocarcinoma, exocrine	73	SIDM00371	#N/A	pancreas	exocrine	exocrine_adenocarcinoma	#N/A
222	ACH-000657	A2780	A2780	A2780_OVARY	#N/A	906804	Female	ECACC	2	-3.75409	Suspension	RPMI + 10% FBS + 2mM Glutamine + 0.05/mL cisplatin	83.3	CVCL_0134	1245	ovary	Primary	Ovarian Cancer	Adenocarcinoma, endometrioid	#N/A	SIDM00210	#N/A	ovary	ovary_adenocarcinoma	endometrioid	#N/A
223	ACH-000661	WM1799	WM1799	WM1799_SKIN	#N/A	#N/A	Male	WISTAR	2	-4.56556	Adherent	RPMI + 10% FBS	69.2	CVCL_A341	#N/A	skin	#N/A	Skin Cancer	Melanoma	#N/A	#N/A	#N/A	skin	melanoma	#N/A	#N/A
224	ACH-000662	COR-L23	CORL23	CORL23_LUNG	COR-L23/CPR	687780	Male	ECACC	1	-2.21644	Adherent	RPMI + 10% FBS + 2mM Glutamine	65.1	CVCL_1139	1313	pleural_effusion	Metastasis	Lung Cancer	Non-Small Cell Lung Cancer (NSCLC), Large Cell Carcinoma	62	SIDM00512	#N/A	lung	NSCLC	NSCLC_large_cell	#N/A
225	ACH-000666	NCI-H1355	NCIH1355	NCIH1355_LUNG	#N/A	724866	Male	ATCC	#N/A	#N/A	#N/A	#N/A	#N/A	CVCL_1464	1780	pleural_effusion	Metastasis	Lung Cancer	Non-Small Cell Lung Cancer (NSCLC), Adenocarcinoma	53	SIDM00645	#N/A	lung	NSCLC	NSCLC_adenocarcinoma	#N/A
226	ACH-000667	HCC-44	HCC44	HCC44_LUNG	#N/A	1240145	Female	DSMZ	2	-4.70865	#N/A	RPMI + 10% FBS	93.3	CVCL_2060	1247	lung	Primary	Lung Cancer	Non-Small Cell Lung Cancer (NSCLC), Adenocarcinoma	54	SIDM01069	#N/A	lung	NSCLC	NSCLC_adenocarcinoma	#N/A
227	ACH-000668	HCC70	HCC70	HCC70_BREAST	#N/A	907048	Female	ATCC	#N/A	#N/A	#N/A	#N/A	#N/A	CVCL_1270	937	breast	Primary	Breast Cancer	Breast Ductal Carcinoma	49	SIDM00673	#N/A	breast	breast_ductal_carcinoma	ERneg_HER2neg	basal_A
228	ACH-000670	SBC-5	SBC5	SBC5_LUNG	#N/A	713880	Male	HSRRB	#N/A	#N/A	#N/A	#N/A	#N/A	CVCL_1679	999	pleural_effusion	Metastasis	Lung Cancer	Small Cell Lung Cancer (SCLC)	#N/A	SIDM00368	#N/A	lung	SCLC	#N/A	#N/A
229	ACH-000671	HuH-6	HUH6	HUH6_LIVER	#N/A	#N/A	Male	RIKEN	2	-4.7538	#N/A	DMEM + 10% FBS	85.2	CVCL_4381	#N/A	liver	#N/A	Liver Cancer	Hepatoblastoma	#N/A	SIDM00062	#N/A	liver	hepatoblastoma	#N/A	#N/A
230	ACH-000672	IA-LM	IALM	IALM_LUNG	#N/A	910779	Male	RIKEN	0	-0.974955	Adherent	F12 + 10% FBS	67.9	CVCL_1302	1792	skin	Metastasis	Lung Cancer	Non-Small Cell Lung Cancer (NSCLC), Large Cell Carcinoma	68	SIDM00306	#N/A	lung	NSCLC	NSCLC_large_cell	#N/A
231	ACH-000677	SW 1573	SW1573	SW1573_LUNG	#N/A	724878	Female	ATCC	2	-3.51785	Adherent	L15 + 10% FBS	89.2	CVCL_1720	849	lung	Primary	Lung Cancer	Non-Small Cell Lung Cancer (NSCLC), Adenocarcinoma	44	SIDM01163	#N/A	lung	NSCLC	NSCLC_adenocarcinoma	#N/A
232	ACH-000678	MKN7	MKN7	MKN7_STOMACH	#N/A	924250	Male	RIKEN	#N/A	#N/A	#N/A	#N/A	#N/A	CVCL_1417	2113	lymph_node	Metastasis	Gastric Cancer	Adenocarcinoma, tubular	39	SIDM00560	#N/A	gastric	gastric_adenocarcinoma	tubular	#N/A
233	ACH-000680	SW948	SW948	SW948_LARGE_INTESTINE	#N/A	909757	Female	ATCC	1	-1.37353	Adherent	RPMI + 10% FBS	62.4	CVCL_0632	1689	Colon	Primary	Colon/Colorectal Cancer	Adenocarcinoma	81	SIDM00832	#N/A	colorectal	colorectal_adenocarcinoma	#N/A	#N/A
234	ACH-000681	A549	A549	A549_LUNG	#N/A	905949	Male	ATCC	4	-2.67323	Adherent	F12 + 10% FBS	82.8	CVCL_0023	369	lung	Primary	Lung Cancer	Non-Small Cell Lung Cancer (NSCLC), Adenocarcinoma	52	SIDM00903	#N/A	lung	NSCLC	NSCLC_adenocarcinoma	#N/A
235	ACH-000684	KMRC-1	KMRC1	KMRC1_KIDNEY	#N/A	1298168	Male	HSRRB	3	-1.97564	#N/A	DMEM + 10% FBS	78.4	CVCL_2983	1514	kidney	Primary	Kidney Cancer	Renal Carcinoma, clear cell	#N/A	SIDM00611	#N/A	kidney	renal_cell_carcinoma	clear_cell	#N/A
236	ACH-000685	L3.3	L33	L33_PANCREAS	#N/A	#N/A	Female	Academic lab	2	-3.9596	Adherent	DMEM + 10% FBS + 2mM Glutamine + 1mM Sodium pyruvate + 1mM NEAA	48.1	CVCL_8147	#N/A	lymph_node	Metastasis	Pancreatic Cancer	Ductal Adenosquamous Carcinoma	#N/A	#N/A	#N/A	pancreas	exocrine	exocrine_adenosquamous	#N/A
237	ACH-000693	KYSE-180	KYSE180	KYSE180_OESOPHAGUS	#N/A	907318	Male	DSMZ	2	-5.41442	Adherent	RPMI + 10% FBS	67.9	CVCL_1349	599	oesophagus	Primary	Esophageal Cancer	Squamous Cell Carcinoma	53	SIDM01030	#N/A	esophagus	esophagus_squamous	#N/A	#N/A
238	ACH-000695	COR-L47	CORL47	CORL47_LUNG	#N/A	#N/A	Male	ECACC	1	-2.18767	Suspension	RPMI + 10% FBS + 2mM Glutamine	60.3	CVCL_2415	#N/A	bone_marrow	Metastasis	Lung Cancer	Small Cell Lung Cancer (SCLC)	67	#N/A	#N/A	lung	SCLC	#N/A	#N/A
239	ACH-000696	OVCAR-8	OVCAR8	OVCAR8_OVARY	#N/A	905991	Female	NCI/DCTD	3	-5.06276	#N/A	RPMI + 10% FBS	60.2	CVCL_1629	2131	ovary	Primary	Ovarian Cancer	Adenocarcinoma, high grade serous	64	SIDM00090	#N/A	ovary	ovary_adenocarcinoma	high_grade_serous	#N/A
240	ACH-000699	HCC1395	HCC1395	HCC1395_BREAST	#N/A	749712	Female	ATCC	3	-5.13397	Adherent	RPMI + 10% FBS	47.4	CVCL_1249	94	breast	Primary	Breast Cancer	Breast Ductal Carcinoma	43	SIDM00884	#N/A	breast	breast_ductal_carcinoma	ERneg_HER2neg	basal_B
241	ACH-000701	RMUG-S	RMUGS	RMUGS_OVARY	#N/A	#N/A	Female	HSRRB	2	-2.74832	#N/A	F12 + 10% FBS	64.7	CVCL_3158	#N/A	ovary	Primary	Ovarian Cancer	Cystadenocarcinoma, mucinous	62	#N/A	#N/A	ovary	ovary_adenocarcinoma	mucinous	#N/A
242	ACH-000711	JIMT-1	JIMT1	JIMT1_BREAST	#N/A	1298157	Female	DSMZ	3	-6.46142	#N/A	RPMI + 10% FBS	95.5	CVCL_2077	479	pleural_effusion	Metastasis	Breast Cancer	Breast Ductal Carcinoma	62	SIDM01037	#N/A	breast	breast_ductal_carcinoma	ERneg_HER2pos	basal_A
243	ACH-000713	Caov-3	CAOV3	CAOV3_OVARY	#N/A	906825	Female	ATCC	3	-2.50363	Adherent	DMEM + 10% FBS	77.4	CVCL_0201	320	ovary	Primary	Ovarian Cancer	Adenocarcinoma, high grade serous	54	SIDM00919	#N/A	ovary	ovary_adenocarcinoma	high_grade_serous	#N/A
244	ACH-000714	KMS-11	KMS11	KMS11_HAEMATOPOIETIC_AND_LYMPHOID_TISSUE	#N/A	1659817	Female	HSRRB	1	-2.75912	Adherent	RPMI + 10% FBS	96.1	CVCL_2989	1308	pleural_effusion	Primary	Myeloma	Multiple Myeloma	67	SIDM00608	#N/A	plasma_cell	multiple_myeloma	#N/A	#N/A
245	ACH-000718	NCI-H2291	NCIH2291	NCIH2291_LUNG	#N/A	724874	Male	ATCC	3	-3.75397	Adherent	RPMI + 10% FBS	70.3	CVCL_1546	917	lymph_node	Metastasis	Lung Cancer	Non-Small Cell Lung Cancer (NSCLC), Adenocarcinoma	#N/A	SIDM00728	#N/A	lung	NSCLC	NSCLC_adenocarcinoma	#N/A
246	ACH-000720	TCCSUP	TCCSUP	TCCSUP_URINARY_TRACT	#N/A	687459	Female	ATCC	2	-4.76611	Adherent	EMEM + 10% FBS + 1mM Sodium pyruvate + 1mM NEAA	80.9	CVCL_1738	275	urinary_tract	Primary	Bladder Cancer	Transitional Cell Carcinoma	67	SIDM01190	#N/A	urinary_tract	bladder_carcinoma	bladder_transitional_cell	#N/A
247	ACH-000722	SNU-C1	SNUC1	SNUC1_LARGE_INTESTINE	#N/A	910905	Male	ATCC	#N/A	#N/A	#N/A	#N/A	#N/A	CVCL_1708	1066	abdomen	Metastasis	Colon/Colorectal Cancer	Adenocarcinoma	71	SIDM01197	#N/A	colorectal	colorectal_adenocarcinoma	#N/A	#N/A
248	ACH-000724	HT-1376	HT1376	HT1376_URINARY_TRACT	#N/A	907066	Female	ATCC	2	-2.69946	Adherent	EMEM + 10% FBS	51.4	CVCL_1292	1211	urinary_tract	Primary	Bladder Cancer	Carcinoma	58	SIDM00678	#N/A	urinary_tract	bladder_carcinoma	#N/A	#N/A
249	ACH-000726	TE-14	TE14	TE14_OESOPHAGUS	#N/A	#N/A	Male	RIKEN	#N/A	#N/A	#N/A	#N/A	#N/A	CVCL_3336	#N/A	oesophagus	#N/A	Esophageal Cancer	Squamous Cell Carcinoma	#N/A	#N/A	#N/A	esophagus	esophagus_squamous	#N/A	#N/A
250	ACH-000727	NCI-H2066	NCIH2066	NCIH2066_LUNG	#N/A	1330973	Female	ATCC	#N/A	#N/A	#N/A	#N/A	#N/A	CVCL_1520	1073	lung	Primary	Lung Cancer	Small Cell Lung Cancer (SCLC)	70	SIDM00711	#N/A	lung	SCLC	#N/A	#N/A
251	ACH-000728	KASUMI-2	KASUMI2	KASUMI2_HAEMATOPOIETIC_AND_LYMPHOID_TISSUE	#N/A	#N/A	Male	DSMZ	#N/A	#N/A	#N/A	#N/A	#N/A	CVCL_0590	#N/A	bone_marrow	#N/A	Leukemia	Acute Lymphoblastic Leukemia (ALL), B-cell	15	#N/A	#N/A	blood	ALL	b_cell	#N/A
252	ACH-000730	SK-MEL-5	SKMEL5	SKMEL5_SKIN	#N/A	905956	Female	ATCC	0	-0.665329	Adherent	EMEM + 10% FBS	64.7	CVCL_0527	1491	lymph_node	Metastasis	Skin Cancer	Melanoma	24	SIDM00080	#N/A	skin	melanoma	#N/A	#N/A
253	ACH-000734	JHH-5	JHH5	JHH5_LIVER	#N/A	#N/A	Male	HSRRB	3	-4.74174	#N/A	William's E Medium + 10% FBS	74.9	CVCL_0364	#N/A	liver	Primary	Liver Cancer	Hepatocellular Carcinoma	50	#N/A	#N/A	liver	hepatocellular_carcinoma	#N/A	#N/A
254	ACH-000738	GB-1	GB1	GB1_CENTRAL_NERVOUS_SYSTEM	#N/A	687568	Male	HSRRB	2	-4.77689	#N/A	EMEM + 10% FBS	89	CVCL_1227	2095	central_nervous_system	Primary	Brain Cancer	Glioblastoma	35	SIDM00581	#N/A	central_nervous_system	glioma	glioblastoma	#N/A
255	ACH-000739	Hep G2	HEPG2	HEPG2_LIVER	#N/A	#N/A	Male	ATCC	2	-3.30483	Adherent	EMEM + 10% FBS	84.1	CVCL_0027	#N/A	liver	Primary	Liver Cancer	Hepatocellular Carcinoma	15	SIDM00904	#N/A	liver	hepatocellular_carcinoma	#N/A	#N/A
256	ACH-000747	NCI-H1703	NCIH1703	NCIH1703_LUNG	#N/A	908474	Male	ATCC	2	-4.33667	Adherent	RPMI + 10% FBS	91	CVCL_1490	1239	lung	Primary	Lung Cancer	Non-Small Cell Lung Cancer (NSCLC), Squamous Cell Carcinoma	54	SIDM00740	#N/A	lung	NSCLC	NSCLC_squamous	#N/A
257	ACH-000748	SJSA-1	SJSA1	SJSA1_BONE	#N/A	909717	Male	ATCC	1	-4.5023	Adherent	RPMI + 10% FBS	55.3	CVCL_1697	1180	bone	Primary	Bone Cancer	Osteosarcoma	19	SIDM01112	#N/A	bone	osteosarcoma	#N/A	#N/A
258	ACH-000749	DMS 273	DMS273	DMS273_LUNG	#N/A	687985	Female	ECACC	#N/A	#N/A	#N/A	#N/A	#N/A	CVCL_1176	1862	pleural_effusion	Metastasis	Lung Cancer	Small Cell Lung Cancer (SCLC)	50	SIDM00522	#N/A	lung	SCLC	#N/A	#N/A
259	ACH-000750	LOX IMVI	LOXIMVI	LOXIMVI_SKIN	#N/A	905974	Male	NCI/DCTD	0	-0.300038	#N/A	RPMI + 10% FBS	59.2	CVCL_1381	401	lymph_node	Metastasis	Skin Cancer	Melanoma	58	SIDM00149	#N/A	skin	melanoma	#N/A	#N/A
260	ACH-000752	NCI-H196	NCIH196	NCIH196_LUNG	#N/A	1240186	Male	ATCC	#N/A	#N/A	#N/A	#N/A	#N/A	CVCL_1509	1250	pleural_effusion	Metastasis	Lung Cancer	Small Cell Lung Cancer (SCLC)	68	SIDM00761	#N/A	lung	SCLC	#N/A	#N/A
261	ACH-000753	JMSU-1	JMSU1	JMSU1_URINARY_TRACT	#N/A	#N/A	Male	DSMZ	2	-5.83475	Adherent	RPMI + 10% FBS + 2mM Glutamax	45	CVCL_2081	#N/A	ascites	Metastasis	Bladder Cancer	Carcinoma	75	#N/A	#N/A	urinary_tract	bladder_carcinoma	#N/A	#N/A
262	ACH-000754	L-428	L428	L428_HAEMATOPOIETIC_AND_LYMPHOID_TISSUE	#N/A	907322	Female	DSMZ	2	-3.31444	#N/A	RPMI + 10% FBS	88.1	CVCL_1361	1804	pleural_effusion	#N/A	Lymphoma	B-cell, Hodgkins	37	SIDM00327	#N/A	lymphocyte	hodgkin_lymphoma	#N/A	#N/A
263	ACH-000755	HCC2218	HCC2218	HCC2218_BREAST	#N/A	749716	Female	ATCC	#N/A	#N/A	#N/A	#N/A	#N/A	CVCL_1263	352	breast	Primary	Breast Cancer	Breast Ductal Carcinoma	38	SIDM00772	#N/A	breast	breast_ductal_carcinoma	ERneg_HER2pos	HER2_amp
264	ACH-000768	MDA-MB-231	MDAMB231	MDAMB231_BREAST	#N/A	905960	Female	ATCC	2	-3.83952	Adherent	RPMI + 10% FBS	91	CVCL_0062	1013	pleural_effusion	Metastasis	Breast Cancer	Carcinoma	51	SIDM00146	#N/A	breast	breast_carcinoma	ERneg_HER2neg	basal_B
265	ACH-000769	LK-2	LK2	LK2_LUNG	#N/A	687787	Male	RIKEN	3	-3.89964	Adherent	DMEM + 10% FBS	81.5	CVCL_1377	45	lung	Primary	Lung Cancer	Non-Small Cell Lung Cancer (NSCLC), Squamous Cell Carcinoma	#N/A	SIDM00548	#N/A	lung	NSCLC	NSCLC_squamous	#N/A
266	ACH-000777	KYSE-30	KYSE30	KYSE30_OESOPHAGUS	#N/A	#N/A	Male	DSMZ	2	-3.8513	Adherent	RPMI:F12 (1:1) + 20% FBS	89	CVCL_1351	#N/A	oesophagus	Primary	Esophageal Cancer	Squamous Cell Carcinoma	64	SIDM00015	#N/A	esophagus	esophagus_squamous	#N/A	#N/A
267	ACH-000778	HSC-3	HSC3	HSC3_UPPER_AERODIGESTIVE_TRACT	#N/A	907061	Male	HSRRB	2	-2.80092	#N/A	EMEM + 10% FBS	79.8	CVCL_1288	648	upper_aerodigestive_tract	Metastasis	Head and Neck Cancer	Squamous Cell Carcinoma	64	SIDM00589	#N/A	upper_aerodigestive	upper_aerodigestive_squamous	#N/A	#N/A
268	ACH-000782	SEM	SEM	SEM_HAEMATOPOIETIC_AND_LYMPHOID_TISSUE	#N/A	#N/A	Female	DSMZ	2	-2.65454	Suspension	IMDM + 10% FBS	74.6	CVCL_0095	#N/A	haematopoietic_and_lymphoid_tissue	Primary	Leukemia	Acute Lymphoblastic Leukemia (ALL), B-cell	5	#N/A	#N/A	blood	ALL	b_cell	#N/A
269	ACH-000783	CAMA-1	CAMA1	CAMA1_BREAST	#N/A	946382	Female	ATCC	3	-2.91326	Adherent	EMEM + 10% FBS	93.5	CVCL_1115	363	pleural_effusion	Metastasis	Breast Cancer	Carcinoma	51	SIDM00920	#N/A	breast	breast_carcinoma	ERpos_HER2neg	luminal
270	ACH-000784	KYSE-70	KYSE70	KYSE70_OESOPHAGUS	#N/A	753576	Male	DSMZ	2	-5.23066	#N/A	RPMI + 10% FBS	86.4	CVCL_1356	2219	oesophagus	Primary	Esophageal Cancer	Squamous Cell Carcinoma	77	SIDM01024	#N/A	esophagus	esophagus_squamous	#N/A	#N/A
271	ACH-000785	NCI-H2126	NCIH2126	NCIH2126_LUNG	#N/A	#N/A	Male	ATCC	3	-3.32693	Adherent	DMEM:F12 (1:1) + 5% FBS + 2mM L-glutamine + 5ug/ml Insulin+ 0.01mg/ml Transferrin+ 10nM Selenium + 10mM HEPES + 10nM Hydrocortisone + 10nM Beta estradiol	81.3	CVCL_1532	#N/A	haematopoietic_and_lymphoid_tissue	Metastasis	Lung Cancer	Non-Small Cell Lung Cancer (NSCLC), Adenocarcinoma	65	SIDM00775	#N/A	lung	NSCLC	NSCLC_adenocarcinoma	#N/A
272	ACH-000787	LXF-289	LXF289	LXF289_LUNG	#N/A	753592	Male	DSMZ	3	-5.02264	Adherent	F12 + 10% FBS	82.2	CVCL_1394	1175	lung	Primary	Lung Cancer	Non-Small Cell Lung Cancer (NSCLC), Adenocarcinoma	63	SIDM00339	#N/A	lung	NSCLC	NSCLC_adenocarcinoma	#N/A
273	ACH-000788	A2058	A2058	A2058_SKIN	#N/A	906792	Male	ATCC	2	-5.19089	Adherent	DMEM + 10% FBS	#N/A	CVCL_1059	652	lymph_node	Metastasis	Skin Cancer	Melanoma	43	SIDM00797	#N/A	skin	melanoma	#N/A	#N/A
274	ACH-000790	SHP-77	SHP77	SHP77_LUNG	#N/A	724872	Male	ATCC	2	-3.47027	Mixed adherent and suspension	RPMI + 10% FBS	89.4	CVCL_1693	1479	lung	Primary	Lung Cancer	Small Cell Lung Cancer (SCLC)	54	SIDM01078	#N/A	lung	SCLC	#N/A	#N/A
275	ACH-000793	KATO III	KATOIII	KATOIII_STOMACH	#N/A	907276	Male	ATCC	2	-4.58917	Mixed adherent and suspension	IMDM + 20% FBS	68.9	CVCL_0371	406	pleural_effusion	Metastasis	Gastric Cancer	Adenocarcinoma, signet ring cell	55	SIDM00687	#N/A	gastric	gastric_adenocarcinoma	signet_ring_cell	#N/A
276	ACH-000794	BICR 22	BICR22	BICR22_UPPER_AERODIGESTIVE_TRACT	#N/A	1240121	Male	ECACC	2	-4.1027	Adherent	DMEM + 10% FBS + 2mM Glutamine + 0.4ug/ml Hydrocortisone	94.4	CVCL_2310	1575	lymph_node	Metastasis	Head and Neck Cancer	Squamous Cell Carcinoma, oral	#N/A	SIDM00485	#N/A	upper_aerodigestive	upper_aerodigestive_squamous	oral	#N/A
277	ACH-000799	Hs 695T	HS695T	HS695T_SKIN	#N/A	#N/A	Male	ATCC	2	-3.06351	Adherent	EMEM + 10% FBS	62.2	CVCL_0851	#N/A	lymph_node	Metastasis	Skin Cancer	Melanoma, amelanotic	26	#N/A	#N/A	skin	melanoma	amelanotic	#N/A
278	ACH-000800	NCI-H446	NCIH446	NCIH446_LUNG	#N/A	688023	Male	ATCC	2	-2.9557	Mixed adherent and suspension	RPMI + 10% FBS	82.8	CVCL_1562	1222	pleural_effusion	Metastasis	Lung Cancer	Small Cell Lung Cancer (SCLC)	61	SIDM00965	#N/A	lung	SCLC	#N/A	#N/A
279	ACH-000805	COLO-679	COLO679	COLO679_SKIN	#N/A	906818	Female	DSMZ	2	-3.09326	Adherent	RPMI + 10% FBS	74.1	CVCL_1130	2049	skin	Metastasis	Skin Cancer	Melanoma	47	SIDM00284	#N/A	skin	melanoma	#N/A	#N/A
280	ACH-000809	KYSE-410	KYSE410	KYSE410_OESOPHAGUS	#N/A	753574	Male	DSMZ	2	-4.25481	Adherent	RPMI + 10% FBS	91.3	CVCL_1352	952	oesophagus	Primary	Esophageal Cancer	Squamous Cell Carcinoma	51	SIDM01028	#N/A	esophagus	esophagus_squamous	#N/A	#N/A
281	ACH-000810	SK-MEL-30	SKMEL30	SKMEL30_SKIN	#N/A	909726	Male	DSMZ	1	-2.65097	Adherent	RPMI + 10% FBS	69.7	CVCL_0039	1789	skin	Metastasis	Skin Cancer	Melanoma	67	SIDM00392	#N/A	skin	melanoma	#N/A	#N/A
282	ACH-000817	RPMI 8226	RPMI8226	RPMI8226_HAEMATOPOIETIC_AND_LYMPHOID_TISSUE	#N/A	905964	Male	ATCC	2	-2.79664	Suspension	RPMI + 10% FBS	60.7	CVCL_0014	705	haematopoietic_and_lymphoid_tissue	Primary	Myeloma	Multiple Myeloma, plasmacytoma	61	SIDM00087	#N/A	plasma_cell	multiple_myeloma	plasmacytoma	#N/A
283	ACH-000819	LN-18	LN18	LN18_CENTRAL_NERVOUS_SYSTEM	#N/A	1240168	Male	ATCC	2	-3.92283	Adherent	DMEM + 5% FBS	80.5	CVCL_0392	1503	central_nervous_system	Primary	Brain Cancer	Glioblastoma	65	SIDM00685	#N/A	central_nervous_system	glioma	glioblastoma	#N/A
284	ACH-000820	SW403	SW403	SW403_LARGE_INTESTINE	#N/A	#N/A	Female	ATCC	1	-1.56987	Adherent	L15 + 10% FBS	24.8	CVCL_0545	#N/A	Colon	Primary	Colon/Colorectal Cancer	Adenocarcinoma	51	SIDM00836	#N/A	colorectal	colorectal_adenocarcinoma	#N/A	#N/A
285	ACH-000824	KYSE-510	KYSE510	KYSE510_OESOPHAGUS	#N/A	907321	Female	DSMZ	2	-3.4473	#N/A	RPMI + 10% FBS	94	CVCL_1354	893	oesophagus	Primary	Esophageal Cancer	Squamous Cell Carcinoma	67	SIDM01026	#N/A	esophagus	esophagus_squamous	#N/A	#N/A
286	ACH-000827	WM-793	WM793	WM793_SKIN	#N/A	1299081	Male	WISTAR	2	-4.51664	Adherent	RPMI + 10% FBS	55	CVCL_8787	114	skin	#N/A	Skin Cancer	Melanoma	#N/A	SIDM00973	#N/A	skin	melanoma	#N/A	#N/A
287	ACH-000831	HEC-50B	HEC50B	HEC50B_ENDOMETRIUM	#N/A	#N/A	Female	HSRRB	2	-3.88729	#N/A	EMEM + 15% FBS	87.4	CVCL_2929	#N/A	ascites	Metastasis	Endometrial/Uterine Cancer	Endometrial Adenocarcinoma	#N/A	#N/A	#N/A	uterus	endometrial_adenocarcinoma	#N/A	#N/A
288	ACH-000832	CAL 27	CAL27	CAL27_UPPER_AERODIGESTIVE_TRACT	#N/A	910916	Male	ATCC	1	-3.42861	Adherent	DMEM + 10% FBS	85.7	CVCL_1107	1911	upper_aerodigestive_tract	Primary	Head and Neck Cancer	Squamous Cell Carcinoma	56	SIDM00937	#N/A	upper_aerodigestive	upper_aerodigestive_squamous	#N/A	#N/A
289	ACH-000833	RH-30	RH30	RH30_SOFT_TISSUE	#N/A	#N/A	Male	DSMZ	2	-3.36345	Adherent	RPMI + 10% FBS	61.5	CVCL_0041	#N/A	bone_marrow	Metastasis	Sarcoma	Rhabdomyosarcoma, alveolar	17	#N/A	#N/A	soft_tissue	rhabdomyosarcoma	alveolar	#N/A
290	ACH-000842	SW 480	SW480	SW480_LARGE_INTESTINE	#N/A	#N/A	Male	ATCC	#N/A	#N/A	#N/A	#N/A	#N/A	CVCL_0546	#N/A	lymph_node	Primary	Colon/Colorectal Cancer	Adenocarcinoma	50	SIDM00840	#N/A	colorectal	colorectal_adenocarcinoma	#N/A	#N/A
291	ACH-000846	FaDu	FADU	FADU_UPPER_AERODIGESTIVE_TRACT	#N/A	906863	Male	ATCC	2	-3.05071	Adherent	EMEM + 10% FBS	92.5	CVCL_1218	1170	upper_aerodigestive_tract	Primary	Head and Neck Cancer	Squamous Cell Carcinoma	56	SIDM00860	#N/A	upper_aerodigestive	upper_aerodigestive_squamous	#N/A	#N/A
292	ACH-000847	HGC-27	HGC27	HGC27_STOMACH	#N/A	907055	Unknown	ECACC	2	-2.82999	Adherent	MEM + 10% FBS + 2mM L-glutamine + NEAA	59.1	CVCL_1279	1102	lymph_node	Metastasis	Gastric Cancer	Adenocarcinoma	#N/A	SIDM00290	#N/A	gastric	gastric_adenocarcinoma	#N/A	#N/A
293	ACH-000848	JHH-7	JHH7	JHH7_LIVER	#N/A	1240160	Male	HSRRB	2	-4.14595	#N/A	William's E medium + 10% FBS	79.4	CVCL_2805	1038	liver	Primary	Liver Cancer	Hepatocellular Carcinoma	53	SIDM00614	#N/A	liver	hepatocellular_carcinoma	#N/A	#N/A
294	ACH-000849	MDA-MB-468	MDAMB468	MDAMB468_BREAST	#N/A	908123	Female	ATCC	1	-4.48105	Adherent	DMEM + 10% FBS	90.6	CVCL_0419	415	pleural_effusion	Metastasis	Breast Cancer	Carcinoma	51	SIDM00628	#N/A	breast	breast_carcinoma	ERneg_HER2neg	basal_A
295	ACH-000852	NCI-H1435	NCIH1435	NCIH1435_LUNG	#N/A	1298347	Female	ATCC	#N/A	#N/A	#N/A	#N/A	#N/A	CVCL_1470	2119	lung	Primary	Lung Cancer	Non-Small Cell Lung Cancer (NSCLC), Adenocarcinoma	35	SIDM00658	#N/A	lung	NSCLC	NSCLC_adenocarcinoma	#N/A
296	ACH-000853	NCI-H661	NCIH661	NCIH661_LUNG	#N/A	687829	Male	ATCC	2	-4.40138	Adherent	RPMI + 10% FBS	84.8	CVCL_1577	107	lymph_node	Metastasis	Lung Cancer	Non-Small Cell Lung Cancer (NSCLC), Large Cell Carcinoma	43	SIDM01122	#N/A	lung	NSCLC	NSCLC_large_cell	#N/A
297	ACH-000855	KYSE-150	KYSE150	KYSE150_OESOPHAGUS	#N/A	907317	Female	DSMZ	2	-3.33154	Adherent	RPMI:F12 (1:1) + 10% FBS	86.4	CVCL_1348	407	oesophagus	Primary	Esophageal Cancer	Squamous Cell Carcinoma	49	SIDM01031	#N/A	esophagus	esophagus_squamous	#N/A	#N/A
298	ACH-000856	CAL-51	CAL51	CAL51_BREAST	#N/A	910927	Female	DSMZ	3	-4.21741	Adherent	DMEM + 20% FBS	56.8	CVCL_1110	4	pleural_effusion	Metastasis	Breast Cancer	Carcinoma	45	SIDM00933	#N/A	breast	breast_carcinoma	ERneg_HER2neg	basal_B
299	ACH-000857	CAL-85-1	CAL851	CAL851_BREAST	#N/A	910852	Female	DSMZ	#N/A	#N/A	#N/A	#N/A	#N/A	CVCL_1114	113	breast	Primary	Breast Cancer	Carcinoma	35	SIDM00928	#N/A	breast	breast_carcinoma	ERneg_HER2neg	basal_A
300	ACH-000859	HCC1954	HCC1954	HCC1954_BREAST	#N/A	749709	Female	ATCC	2	-2.61595	Adherent	RPMI + 10% FBS	66.8	CVCL_1259	2143	breast	Primary	Breast Cancer	Breast Ductal Carcinoma	61	SIDM00872	#N/A	breast	breast_ductal_carcinoma	ERneg_HER2pos	basal_A
301	ACH-000860	NCI-H358	NCIH358	NCIH358_LUNG	#N/A	908465	Male	ATCC	2	-3.23449	Adherent	#N/A	95.3	CVCL_1559	1691	lung	Primary	Lung Cancer	Non-Small Cell Lung Cancer (NSCLC), Adenocarcinoma	#N/A	SIDM00718	#N/A	lung	NSCLC	NSCLC_adenocarcinoma	#N/A
302	ACH-000865	KYSE-450	KYSE450	KYSE450_OESOPHAGUS	#N/A	907320	Male	DSMZ	2	-4.86001	Adherent	RPMI:F12 (1:1) + 10% FBS	75.3	CVCL_1353	60	oesophagus	Primary	Esophageal Cancer	Squamous Cell Carcinoma	59	SIDM01027	#N/A	esophagus	esophagus_squamous	#N/A	#N/A
303	ACH-000866	NCI-H1048	NCIH1048	NCIH1048_LUNG	#N/A	687995	Female	ATCC	2	-5.18445	Adherent	RPMI + 10% FBS + 5ml Insulin-Transferrin-Selenium	89.3	CVCL_1453	1875	pleural_effusion	Metastasis	Lung Cancer	Small Cell Lung Cancer (SCLC)	#N/A	SIDM00654	#N/A	lung	SCLC	#N/A	#N/A
304	ACH-000867	ChaGo-K-1	CHAGOK1	CHAGOK1_LUNG	#N/A	687596	Male	ECACC	2	-4.97411	Adherent	RPMI + 10% FBS	94.4	CVCL_1121	1605	lung	Metastasis	Lung Cancer	Non-Small Cell Lung Cancer (NSCLC), unspecified	45	SIDM00924	#N/A	lung	NSCLC	#N/A	#N/A
305	ACH-000869	NCI-H1568	NCIH1568	NCIH1568_LUNG	#N/A	1298348	Female	ATCC	2	-4.24981	Adherent	RPMI + 10% FBS	94.6	CVCL_1476	711	lymph_node	Metastasis	Lung Cancer	Non-Small Cell Lung Cancer (NSCLC), Adenocarcinoma	48	SIDM00750	#N/A	lung	NSCLC	NSCLC_adenocarcinoma	#N/A
306	ACH-000878	HCC-15	HCC15	HCC15_LUNG	#N/A	1240143	Male	DSMZ	2	-1.47249	Mixed adherent and suspension	RPMI + 10% FBS	88.1	CVCL_2057	1368	lung	Primary	Lung Cancer	Non-Small Cell Lung Cancer (NSCLC), Squamous Cell Carcinoma	47	SIDM01072	#N/A	lung	NSCLC	NSCLC_squamous	#N/A
307	ACH-000879	MFE-296	MFE296	MFE296_ENDOMETRIUM	#N/A	908130	Female	DSMZ	#N/A	#N/A	#N/A	#N/A	#N/A	CVCL_1406	920	endometrium	Primary	Endometrial/Uterine Cancer	Endometrial Adenocarcinoma	68	SIDM00334	#N/A	uterus	endometrial_adenocarcinoma	#N/A	#N/A
308	ACH-000880	AGS	AGS	AGS_STOMACH	#N/A	906790	Female	ATCC	2	-3.46694	Adherent	F12K + 10% FBS	83.7	CVCL_0139	1011	stomach	Primary	Gastric Cancer	Adenocarcinoma	54	SIDM00850	#N/A	gastric	gastric_adenocarcinoma	#N/A	#N/A
309	ACH-000881	MEL-JUSO	MELJUSO	MELJUSO_SKIN	#N/A	908125	Female	DSMZ	2	-3.90593	Adherent	RPMI + 10% FBS	80.2	CVCL_1403	626	skin	Primary	Skin Cancer	Melanoma	58	SIDM00336	#N/A	skin	melanoma	#N/A	#N/A
310	ACH-000882	IGR-1	IGR1	IGR1_SKIN	#N/A	907169	Male	DSMZ	2	-4.92604	Adherent	DMEM + 10% FBS	91.4	CVCL_1303	1534	lymph_node	Metastasis	Skin Cancer	Melanoma	42	SIDM01060	#N/A	skin	melanoma	#N/A	#N/A
311	ACH-000883	SW 1783	SW1783	SW1783_CENTRAL_NERVOUS_SYSTEM	#N/A	909750	Male	ATCC	#N/A	#N/A	#N/A	#N/A	#N/A	CVCL_1722	1453	central_nervous_system	Primary	Brain Cancer	Astrocytoma	68	SIDM01164	#N/A	central_nervous_system	glioma	astrocytoma	#N/A
312	ACH-000886	NCI-H2009	NCIH2009	NCIH2009_LUNG	#N/A	724873	Female	ATCC	2	-5.10551	#N/A	DMEM:F12 (1:1) + 5% FBS + 2mM L-glutamine + 5ug/ml Insulin+ 0.01mg/ml Transferrin+ 10nM Selenium + 10mM HEPES + 10nM Hydrocortisone + 10nM Beta estradiol	89.7	CVCL_1514	79	lymph_node	Metastasis	Lung Cancer	Non-Small Cell Lung Cancer (NSCLC), Adenocarcinoma	68	SIDM00756	#N/A	lung	NSCLC	NSCLC_adenocarcinoma	#N/A
313	ACH-000888	NCI-H1793	NCIH1793	NCIH1793_LUNG	#N/A	908463	Female	ATCC	2	-4.3724	Adherent	DMEM:F12 (1:1) + 5% FBS + 2mM L-glutamine + 5ug/ml Insulin+ 0.01mg/ml Transferrin+ 30nM Selenium + 10mM HEPES + 10nM Hydrocortisone + 10nM Beta estradiol	83.4	CVCL_1496	934	lung	Primary	Lung Cancer	Non-Small Cell Lung Cancer (NSCLC), Adenocarcinoma	52	SIDM00755	#N/A	lung	NSCLC	NSCLC_adenocarcinoma	#N/A
314	ACH-000890	SW 1271	SW1271	SW1271_LUNG	#N/A	1299062	Male	ATCC	2	-2.98687	Adherent	RPMI + 10% FBS	75	CVCL_1716	2037	lung	Primary	Lung Cancer	Small Cell Lung Cancer (SCLC)	69	SIDM01156	#N/A	lung	SCLC	#N/A	#N/A
315	ACH-000895	CL-34	CL34	CL34_LARGE_INTESTINE	#N/A	1290771	Female	DSMZ	#N/A	#N/A	#N/A	#N/A	#N/A	CVCL_1980	1005	Colon	Primary	Colon/Colorectal Cancer	Adenocarcinoma	#N/A	SIDM00945	#N/A	colorectal	colorectal_adenocarcinoma	#N/A	MSI
316	ACH-000898	SNU-719	SNU719	SNU719_STOMACH	#N/A	#N/A	Male	KCLB	2	-3.47392	#N/A	RPMI + 10% FBS + 2mM L-glutamine	80	CVCL_5086	#N/A	stomach	Primary	Gastric Cancer	Adenocarcinoma, tubular	53	#N/A	#N/A	gastric	gastric_adenocarcinoma	tubular	#N/A
317	ACH-000899	WM-88	WM88	WM88_SKIN	#N/A	#N/A	Male	Academic lab	1	-2.74944	Adherent	RPMI + 10% FBS	47.9	CVCL_6805	#N/A	skin	Metastasis	Skin Cancer	Melanoma	#N/A	#N/A	#N/A	skin	melanoma	#N/A	#N/A
318	ACH-000900	NCI-H23	NCIH23	NCIH23_LUNG	#N/A	905942	Male	ATCC	4	-3.48627	Adherent	RPMI + 10% FBS	81.8	CVCL_1547	2108	lung	Primary	Lung Cancer	Non-Small Cell Lung Cancer (NSCLC), Adenocarcinoma	51	SIDM00138	#N/A	lung	NSCLC	NSCLC_adenocarcinoma	#N/A
319	ACH-000909	JHUEM-2	JHUEM2	JHUEM2_ENDOMETRIUM	#N/A	#N/A	Female	RIKEN	#N/A	#N/A	#N/A	#N/A	#N/A	CVCL_4656	#N/A	endometrium	Primary	Endometrial/Uterine Cancer	Endometrial Adenocarcinoma	62	#N/A	#N/A	uterus	endometrial_adenocarcinoma	#N/A	#N/A
320	ACH-000910	MDA-MB-453	MDAMB453	MDAMB453_BREAST	#N/A	908122	Female	ATCC	3	-3.87918	Adherent	RPMI + 10% FBS	82	CVCL_0418	101	pericardial_effusion	Metastasis	Breast Cancer	Carcinoma	48	SIDM00272	#N/A	breast	breast_carcinoma	ERneg_HER2neg	HER2_amp
321	ACH-000911	NUGC-3	NUGC3	NUGC3_STOMACH	#N/A	908455	Male	JHSF	2	-4.6791	#N/A	RPMI + 10% FBS	83.8	CVCL_1612	1251	soft_tissue	Metastasis	Gastric Cancer	Adenocarcinoma	72	SIDM00572	#N/A	gastric	gastric_adenocarcinoma	#N/A	#N/A
322	ACH-000912	NCI-H2286	NCIH2286	NCIH2286_LUNG	#N/A	#N/A	Female	ATCC	2	-4.86029	#N/A	DMEM:F12 (1:1) + 10% FBS + 1x Insulin-Transferrin-Selenium	75.6	CVCL_1545	#N/A	lung	Primary	Lung Cancer	Small Cell Lung Cancer (SCLC)	57	SIDM00017	#N/A	lung	SCLC	#N/A	#N/A
323	ACH-000915	IPC-298	IPC298	IPC298_SKIN	#N/A	907171	Female	DSMZ	1	-5.8013	Adherent	RPMI + 10% FBS	94.3	CVCL_1307	77	skin	Primary	Skin Cancer	Melanoma	64	SIDM01059	#N/A	skin	melanoma	#N/A	#N/A
324	ACH-000916	NCI-H1573	NCIH1573	NCIH1573_LUNG	#N/A	908472	Female	ATCC	2	-1.34989	Adherent	RPMI + 5% FBS	52	CVCL_1478	372	soft_tissue	Metastasis	Lung Cancer	Non-Small Cell Lung Cancer (NSCLC), Adenocarcinoma	35	SIDM00749	#N/A	lung	NSCLC	NSCLC_adenocarcinoma	#N/A
325	ACH-000917	TE-4	TE4	TE4_OESOPHAGUS	#N/A	1503371	Female	RIKEN	2	-3.8284	#N/A	RPMI + 10% FBS	63.8	CVCL_3337	382	lymph_node	#N/A	Esophageal Cancer	Squamous Cell Carcinoma	#N/A	SIDM00250	#N/A	esophagus	esophagus_squamous	#N/A	#N/A
326	ACH-000919	IM95	IM95	IM95_STOMACH	#N/A	1240155	Male	HSRRB	0	-2.04524	Adherent	DMEM + 10% FBS	60	CVCL_2961	405	stomach	Primary	Gastric Cancer	Adenocarcinoma	63	SIDM00602	#N/A	gastric	gastric_adenocarcinoma	#N/A	#N/A
327	ACH-000922	RCH-ACV	RCHACV	RCHACV_HAEMATOPOIETIC_AND_LYMPHOID_TISSUE	#N/A	1330994	Female	DSMZ	2	-4.59813	Adherent	RPMI + 20% FBS	65.8	CVCL_1851	1160	bone_marrow	#N/A	Leukemia	Acute Lymphoblastic Leukemia (ALL), B-cell	8	SIDM00449	#N/A	blood	ALL	b_cell	#N/A
328	ACH-000924	NCI-H2172	NCIH2172	NCIH2172_LUNG	#N/A	1298353	Female	ATCC	2	-4.91201	Adherent	RPMI + 10% FBS	87	CVCL_1537	1692	lung	Primary	Lung Cancer	Non-Small Cell Lung Cancer (NSCLC), unspecified	#N/A	SIDM00926	#N/A	lung	NSCLC	#N/A	#N/A
329	ACH-000925	DV-90	DV90	DV90_LUNG	#N/A	#N/A	Male	DSMZ	#N/A	#N/A	#N/A	#N/A	#N/A	CVCL_1184	#N/A	pleural_effusion	Metastasis	Lung Cancer	Non-Small Cell Lung Cancer (NSCLC), Adenocarcinoma	50	#N/A	#N/A	lung	NSCLC	NSCLC_adenocarcinoma	#N/A
330	ACH-000926	HT55	HT55	HT55_LARGE_INTESTINE	#N/A	907287	Unknown	ECACC	3	-2.82414	Adherent	EMEM + 20% FBS + Glutamine + NEAA	69.4	CVCL_1294	1688	large_intestine	Primary	Colon/Colorectal Cancer	Adenocarcinoma	#N/A	SIDM00541	#N/A	colorectal	colorectal_adenocarcinoma	#N/A	#N/A
331	ACH-000929	NCI-H2110	NCIH2110	NCIH2110_LUNG	#N/A	1298351	Unknown	ATCC	2	-2.47095	#N/A	RPMI + 10% FBS	67.8	CVCL_1530	1948	pleural_effusion	Metastasis	Lung Cancer	Non-Small Cell Lung Cancer (NSCLC), unspecified	#N/A	SIDM00703	#N/A	lung	NSCLC	#N/A	#N/A
332	ACH-000932	SNU-1	SNU1	SNU1_STOMACH	#N/A	908444	Male	ATCC	2	-4.3561	#N/A	RPMI + 10% FBS	85.4	CVCL_0099	564	stomach	Metastasis	Gastric Cancer	Adenocarcinoma	44	SIDM01146	#N/A	gastric	gastric_adenocarcinoma	#N/A	#N/A
333	ACH-000935	MDST8	MDST8	MDST8_LARGE_INTESTINE	#N/A	1240173	Unknown	ECACC	3	-2.85059	Adherent	DMEM + 10% FBS + 2mM Glutamine	72.2	CVCL_2588	928	large_intestine	#N/A	Colon/Colorectal Cancer	Adenocarcinoma	#N/A	SIDM00527	#N/A	colorectal	colorectal_adenocarcinoma	#N/A	#N/A
334	ACH-000938	NALM-6	NALM6	NALM6_HAEMATOPOIETIC_AND_LYMPHOID_TISSUE	#N/A	908158	Male	DSMZ	2	-4.19532	#N/A	RPMI + 15% FBS	86.6	CVCL_0092	973	haematopoietic_and_lymphoid_tissue	Primary	Leukemia	Acute Lymphoblastic Leukemia (ALL), B-cell	19	SIDM00429	#N/A	blood	ALL	b_cell	#N/A
335	ACH-000943	RKO	RKO	RKO_LARGE_INTESTINE	#N/A	909698	Unknown	ATCC	3	-4.99166	Adherent	MEM + 10% FBS	49.1	CVCL_0504	607	Colon	Primary	Colon/Colorectal Cancer	Adenocarcinoma	#N/A	SIDM01090	#N/A	colorectal	colorectal_adenocarcinoma	#N/A	MSI
336	ACH-000945	NCI-H650	NCIH650	NCIH650_LUNG	#N/A	722066	Male	ATCC	#N/A	#N/A	#N/A	#N/A	#N/A	CVCL_1575	1539	lung	Metastasis	Lung Cancer	Non-Small Cell Lung Cancer (NSCLC), Adenocarcinoma	#N/A	SIDM01124	#N/A	lung	NSCLC	NSCLC_adenocarcinoma	#N/A
337	ACH-000946	HEC-265	HEC265	HEC265_ENDOMETRIUM	#N/A	#N/A	Female	HSRRB	2	-3.59521	#N/A	EMEM + 15% FBS	83.8	CVCL_2928	#N/A	endometrium	Primary	Endometrial/Uterine Cancer	Endometrial Adenocarcinoma	#N/A	#N/A	#N/A	uterus	endometrial_adenocarcinoma	#N/A	#N/A
338	ACH-000954	HEC-1-A	HEC1A	HEC1A_ENDOMETRIUM	#N/A	#N/A	Female	ATCC	0	-1.83053	Adherent	McCoy's 5A + 10% FBS	91.6	CVCL_0293	#N/A	endometrium	Primary	Endometrial/Uterine Cancer	Endometrial Adenocarcinoma	71	SIDM00595	#N/A	uterus	endometrial_adenocarcinoma	#N/A	#N/A
339	ACH-000956	22Rv1	22RV1	22RV1_PROSTATE	22-RV1	924100	Male	ATCC	#N/A	#N/A	#N/A	#N/A	#N/A	CVCL_1045	1027	prostate	Primary	Prostate Cancer	Adenocarcinoma	#N/A	SIDM00499	#N/A	prostate	prostate_adenocarcinoma	#N/A	#N/A
340	ACH-000957	LS 180	LS180	LS180_LARGE_INTESTINE	#N/A	998189	Female	ATCC	2	-2.64705	not found	not found	53	CVCL_0397	2081	Colon	Primary	Colon/Colorectal Cancer	Adenocarcinoma	58	SIDM00680	#N/A	colorectal	colorectal_adenocarcinoma	#N/A	MSI
341	ACH-000958	SW48	SW48	SW48_LARGE_INTESTINE	#N/A	909751	Female	ATCC	2	-2.54259	Adherent	RPMI + 10% FBS	64.2	CVCL_1724	1	Colon	Primary	Colon/Colorectal Cancer	Adenocarcinoma	82	SIDM00837	#N/A	colorectal	colorectal_adenocarcinoma	#N/A	MSI
342	ACH-000960	Reh	REH	REH_HAEMATOPOIETIC_AND_LYMPHOID_TISSUE	#N/A	909696	Female	ATCC	2	-4.12674	Suspension	RPMI + 10% FBS	65	CVCL_1650	1272	haematopoietic_and_lymphoid_tissue	Primary	Leukemia	Acute Lymphoblastic Leukemia (ALL), B-cell	15	SIDM00447	#N/A	blood	ALL	b_cell	#N/A
343	ACH-000961	Ishikawa (Heraklio) 02 ER-	ISHIKAWAHERAKLIO02ER	ISHIKAWAHERAKLIO02ER_ENDOMETRIUM	#N/A	#N/A	Female	ECACC	2	-2.97524	#N/A	MEM + 10% FBS	43.7	CVCL_6543	#N/A	endometrium	Primary	Endometrial/Uterine Cancer	Endometrial Adenocarcinoma	39	SIDM00037	#N/A	uterus	endometrial_adenocarcinoma	#N/A	#N/A
344	ACH-000963	CCK-81	CCK81	CCK81_LARGE_INTESTINE	#N/A	1240123	Female	HSRRB	3	-1.64135	#N/A	EMEM + 10% FBS	50.1	CVCL_2873	1915	large_intestine	Metastasis	Colon/Colorectal Cancer	Adenocarcinoma	#N/A	SIDM00487	#N/A	colorectal	colorectal_adenocarcinoma	#N/A	MSI
345	ACH-000966	IGROV1	IGROV1	IGROV1_OVARY	#N/A	905968	Female	NCI/DCTD	#N/A	#N/A	#N/A	#N/A	#N/A	CVCL_1304	1215	ovary	Primary	Ovarian Cancer	Adenocarcinoma, mixed	47	SIDM00151	#N/A	ovary	ovary_adenocarcinoma	mixed_endometrioid_clear_cell	#N/A
346	ACH-000967	SNU-C2A	SNUC2A	SNUC2A_LARGE_INTESTINE	#N/A	#N/A	Female	ATCC	#N/A	#N/A	#N/A	#N/A	#N/A	CVCL_1709	#N/A	large_intestine	Primary	Colon/Colorectal Cancer	Adenocarcinoma	43	SIDM00780	#N/A	colorectal	colorectal_adenocarcinoma	#N/A	MSI
347	ACH-000970	SNU-C5	SNUC5	SNUC5_LARGE_INTESTINE	#N/A	1674021	Female	KCLB	#N/A	#N/A	#N/A	#N/A	#N/A	CVCL_5112	152	Colon	#N/A	Colon/Colorectal Cancer	Adenocarcinoma	77	SIDM00498	#N/A	colorectal	colorectal_adenocarcinoma	#N/A	#N/A
348	ACH-000971	HCT 116	HCT116	HCT116_LARGE_INTESTINE	#N/A	905936	Male	ATCC	#N/A	#N/A	#N/A	#N/A	#N/A	CVCL_0291	1920	large_intestine	Primary	Colon/Colorectal Cancer	Adenocarcinoma	#N/A	SIDM00783	#N/A	colorectal	colorectal_adenocarcinoma	#N/A	MSI
349	ACH-000974	SNG-M	SNGM	SNGM_ENDOMETRIUM	#N/A	909735	Female	HSRRB	2	-3.48987	#N/A	F12 + 20% FBS	90.2	CVCL_1707	2058	lymph_node	Metastasis	Endometrial/Uterine Cancer	Endometrial Adenocarcinoma	52	SIDM00373	#N/A	uterus	endometrial_adenocarcinoma	#N/A	#N/A
350	ACH-000977	LNCaP clone FGC	LNCAPCLONEFGC	LNCAPCLONEFGC_PROSTATE	LNCAPCLONEFGC, LN-Cap-cloneFGC, LNCaP clone FGC	907788	Male	ATCC	2	-3.48426	Mixed adherent and suspension	RPMI + 10% FBS	97.2	CVCL_1379	2080	lymph_node	Metastasis	Prostate Cancer	Adenocarcinoma	50	SIDM00683	#N/A	prostate	prostate_adenocarcinoma	#N/A	#N/A
351	ACH-000979	DU 145	DU145	DU145_PROSTATE	#N/A	905935	Male	ATCC	#N/A	#N/A	#N/A	#N/A	#N/A	CVCL_0105	872	central_nervous_system	Metastasis	Prostate Cancer	Adenocarcinoma	69	SIDM00120	#N/A	prostate	prostate_adenocarcinoma	#N/A	#N/A
352	ACH-000980	NCI-H1155	NCIH1155	NCIH1155_LUNG	#N/A	908467	Male	ATCC	2	-6.51951	Suspension	DMEM:F12 (1:1) + 10% FBS + NEAA	74.2	CVCL_1456	801	lymph_node	Metastasis	Lung Cancer	Non-Small Cell Lung Cancer (NSCLC), Large Cell Carcinoma	36	SIDM00651	#N/A	lung	NSCLC	NSCLC_large_cell	#N/A
353	ACH-000984	HEC-6	HEC6	HEC6_ENDOMETRIUM	#N/A	#N/A	Female	HSRRB	2	-2.90168	#N/A	EMEM + 15% FBS	61.9	CVCL_2931	#N/A	endometrium	Primary	Endometrial/Uterine Cancer	Endometrial Adenocarcinoma	#N/A	#N/A	#N/A	uterus	endometrial_adenocarcinoma	#N/A	#N/A
354	ACH-000985	LS411N	LS411N	LS411N_LARGE_INTESTINE	#N/A	907794	Male	ATCC	#N/A	#N/A	#N/A	#N/A	#N/A	CVCL_1385	724	large_intestine	Primary	Colon/Colorectal Cancer	Adenocarcinoma	32	SIDM00660	#N/A	colorectal	colorectal_adenocarcinoma	#N/A	MSI
355	ACH-000986	HT115	HT115	HT115_LARGE_INTESTINE	#N/A	907289	Unknown	ECACC	3	-3.69	Adherent	DMEM + 15% FBS + 2mM Glutamax	70.2	CVCL_2520	2099	Colon	#N/A	Colon/Colorectal Cancer	Adenocarcinoma	#N/A	SIDM00534	#N/A	colorectal	colorectal_adenocarcinoma	#N/A	#N/A
356	ACH-000987	MeWo	MEWO	MEWO_SKIN	#N/A	908128	Male	ATCC	#N/A	#N/A	#N/A	#N/A	#N/A	CVCL_0445	102	lymph_node	Metastasis	Skin Cancer	Melanoma	78	SIDM00545	#N/A	skin	melanoma	#N/A	#N/A
357	ACH-000988	MFE-319	MFE319	MFE319_ENDOMETRIUM	#N/A	1240174	Female	DSMZ	2	-3.84753	Adherent	RPMI:MEM (1:1) (with Earle's salts) + 20% heat inactivated FBS	57.9	CVCL_2112	1816	endometrium	#N/A	Endometrial/Uterine Cancer	#N/A	81	SIDM00333	#N/A	uterus	endometrial_adenocarcinoma	#N/A	#N/A
358	ACH-000990	HEC-108	HEC108	HEC108_ENDOMETRIUM	#N/A	#N/A	Female	HSRRB	#N/A	#N/A	#N/A	#N/A	#N/A	CVCL_2923	#N/A	endometrium	Primary	Endometrial/Uterine Cancer	Endometrial Adenocarcinoma	#N/A	#N/A	#N/A	uterus	endometrial_adenocarcinoma	#N/A	#N/A
359	ACH-000994	HEC-59	HEC59	HEC59_ENDOMETRIUM	#N/A	#N/A	Female	HSRRB	2	-3.89199	#N/A	EMEM + 15% FBS	66.5	CVCL_2930	#N/A	endometrium	Primary	Endometrial/Uterine Cancer	Endometrial Adenocarcinoma	#N/A	#N/A	#N/A	uterus	endometrial_adenocarcinoma	#N/A	#N/A
360	ACH-000996	HEC-251	HEC251	HEC251_ENDOMETRIUM	#N/A	#N/A	Female	HSRRB	2	-2.95119	#N/A	EMEM + 0.15% FBS	82.6	CVCL_2927	#N/A	endometrium	Primary	Endometrial/Uterine Cancer	Endometrial Adenocarcinoma	#N/A	#N/A	#N/A	uterus	endometrial_adenocarcinoma	#N/A	#N/A
361	ACH-000997	HCT-15	HCT15	HCT15_LARGE_INTESTINE	#N/A	905937	Male	ATCC	#N/A	#N/A	#N/A	#N/A	#N/A	CVCL_0292	1553	large_intestine	Primary	Colon/Colorectal Cancer	Adenocarcinoma	#N/A	SIDM00789	#N/A	colorectal	colorectal_adenocarcinoma	#N/A	MSI
362	ACH-001075	NCI-H292	NCIH292	NCIH292_LUNG	H292	753604	Female	ATCC	1	-2.94034	Adherent	RPMI + 10% FBS	70.6	CVCL_0455	935	lymph_node	Metastasis	Lung Cancer	Non-Small Cell Lung Cancer (NSCLC), Mucoepidermoid Carcinoma	32	SIDM00493	#N/A	lung	NSCLC	NSCLC_mucoepidermoid	#N/A
363	ACH-001129	MONO-MAC-1	MONOMAC1	MONOMAC1_HAEMATOPOIETIC_AND_LYMPHOID_TISSUE	#N/A	#N/A	Male	DSMZ	2	-1.69084	#N/A	RPMI + 10% FBS + 2mM Glutamine + 1mM Sodium pyruvate + 0.1mM NEAA	46.6	CVCL_1425	#N/A	haematopoietic_and_lymphoid_tissue	Primary	Leukemia	Acute Myelogenous Leukemia (AML)	64	SIDM01022	#N/A	blood	AML	#N/A	#N/A
364	ACH-001190	SK-MEL-2	SKMEL2	SKMEL2_SKIN	#N/A	905955	Male	ATCC	2	-3.78783	Adherent	EMEM + 10% FBS	73.9	CVCL_0069	1191	skin	Metastasis	Skin Cancer	Melanoma	60	SIDM00082	#N/A	skin	melanoma	#N/A	#N/A
365	ACH-001239	WM-266-4	WM2664	WM2664_SKIN	#N/A	#N/A	Female	ATCC	2	-4.26138	Adherent	DMEM + 10% FBS	71.5	CVCL_2765	#N/A	skin	Metastasis	Skin Cancer	Melanoma	58	SIDM00979	#N/A	skin	melanoma	#N/A	#N/A
366	ACH-001306	8305C	8305C	8305C_THYROID	#N/A	906795	Female	DSMZ	2	-4.77852	Adherent	RPMI + 15% FBS	91.4	CVCL_1053	433	thyroid	Primary	Thyroid Cancer	Carcinoma	67	SIDM00997	#N/A	thyroid	thyroid_carcinoma	#N/A	#N/A
367	ACH-001307	8505C	8505C	8505C_THYROID	#N/A	924102	Female	HSRRB	2	-3.18497	#N/A	EMEM + 0.1% FBS	91	CVCL_1054	868	thyroid	Primary	Thyroid Cancer	Carcinoma	78	SIDM00996	#N/A	thyroid	thyroid_carcinoma	#N/A	#N/A
