# Supplementary material for: Extensive protein dosage compensation in aneuploid human cancers
Source: HighWire-hosted journal article supplement (doi:10.1101/gr.276378.121), 2022-06-14
Supplement: Supplemental_Sheltzer_R_Code.zip [file READ_ME_R.xlsx]

## Sheet: Quick overview
File name	Related Figures	Summary of contents and important files generated:
Note: Many different files were used to crease the different figures and datasets used to this article. Many of these codes are interconnected. So you may need to open several files to run the code you are interested in.
	These datasets often require other dataset to be imported before they are run. For example the Depmap/Broad protein abundance data or the RNA expression data
	you will need to download these files seperately and update the location and/or name of these files in the code below for it to run properly
Protein_RNA_filtered_CellLine.R	All	filter protein expression and rna expression data to get only cell lines shared between rna protein and aneuploidy data
			Protein_Expression_filtered.csv
Protein_RNA_expression.PerCell_v2.R	Figure 2,3,5,6, S2, S3, S4, S5, S6	Difference upon chrm gain/loss dataset(s). plot RNA or Protein expression vs DNA copy number categoty (gain, neutral, loss) boxplots
			CN.Diff.xRNA.yProt.ThreeGroups
Protein_filtered_analysis_3cat.R	Figure 1, S1	Calculates protein expression difference for all genes upon chrm arm gain or loss (ex gain chrm 5, expression diff in chrm 1,2,3,4,5,6, etc. )
			ChrmArmGain.5q.Protein.Diff.all_min10cells.csv
RNA_filtered_analysis_3cat.R	Figure 1, S1	Calculates RNA expression difference for all genes upon chrm arn gain or loss (ex gain chrm 5, expression diff in chrm 1,2,3,4,5,6, etc. )
			ChrmArmGain.5q.RNA.Diff.all.filtered_min10cells.csv
ChrmArm.Scatterplot.Protein.RNA.R	Figure 1	Protein and RNA expression difference per chrm arm scatterplot
DNA_Protein_RNA_filtered.R	Figure 1, S1	Make graphs of chrm arm difference from neutral-ploidy, for specific cells (ex. MCF7)
Protein_RNA_Heatmap_filtered_min10percategory.R	Figure 1	Generate heatmaps: protein/RNA expression difference upon chrm arm gain/loss, and 5th summary heatmap
Protein_RNA_Corr_v2.R	Figure 2, 6	Graph: protein/RNA expression per cell in gain/neutral/loss categories
Yeast_proteomics_v2.R	Figure S5	Aneuploid yeast analysis (Protein & RNA)
DownSyndrome_analysis_v2.R	Figure S5	Down syndrome fibroblast analysis (Protein and RNA)
Stingele_Protein_filter_v2.R	Figure S5	Stable aneuploid cell line analysis (Protein and RNA)
Protein_RNA_1d.plot_v2	Figure 3, 6, S4, S7	plot 1d density plot of gene expression changes per group (Protein and RNA). Also look at low vs high aneuploidy cells only
gProfile_Quantile_Bargraph_v2.R	Figure 3, 4, S4 ,S6, S7	Make graphs of key Gene Ontology enrichment terms (for multiple graphs)
RPPA.Difference.R	Figure S2, S3	RPPA protein expression data analysis
Aneuploid_Score.R	Figure 4, S6	Generates cellular aneuploidy scores
			Aneuploidy.Score.perCell.xlsx
Protein_expression_data_GeneScore.R	Figure 4	Protein expression correlate with cellular aneuploidy (Figure 4), and high/low aneuploid cell only analysis
			Protein_Corr_pvalue_GeneAneuploid.csv
CCLE_RNA_Analysis_geneAn.R	Figure S6	RNA aneuploidy score correlation analysis
			CCLE_RNA_Score2_GeneAneuploid.csv
Variance_aneuploidy.R	Figure 5	Calculate RNA and Protein neutral-ploidy variance
Protein_buffering_factors_v2.R	Figure 5	Protein Buffering factors. Calculate ROC AUC and make boxplots of scores/values
			Protein.AllFactors.csv
			Factor.ROCAUC.correlationscore.csv
TSG.OG_CNV_Difference_v2.R	Figure 6	Oncogene and Tumor Supressor gene difference upon chromosome copy number changes and gene copy number changes
TCGA_ProteinDiff_Ovarian.R	Figure 7, S8	Ovarian tumor data: generating protein and RNA expression differences upon chromosome gain/loss
