# Supplementary material for: Extensive protein dosage compensation in aneuploid human cancers
Source: HighWire-hosted journal article supplement (doi:10.1101/gr.276378.121), 2022-06-14
Supplement: Supplemental_Sheltzer_R_Code.zip [file Trisomy 21 comparison.xlsx]

## Sheet: Sheet1
GeneID	Gene_name	Chr	Ts21 vs. WT	Ts vs. Ds	Ts21 vs. WT
ENSG00000155304	HSPA13	chr21	0.367828	0.222912	0.367828
ENSG00000154719	MRPL39	chr21	-0.150234	-0.0131428	-0.150234
ENSG00000154723	ATP5J	chr21	-0.134227	0.0170586	-0.134227
ENSG00000154727	GABPA	chr21	0.0338431	0.150524	0.0338431
ENSG00000142192	APP	chr21	0.54883	0.0944956	0.54883
ENSG00000156261	CCT8	chr21	0.011597	-0.0824934	0.011597
ENSG00000142168	SOD1	chr21	0.461985	0.616768	0.461985
ENSG00000156304	SFRS15	chr21	0.169327	0.313016	0.169327
ENSG00000159131	GART	chr21	0.379997	0.298308	0.379997
ENSG00000159140	SON	chr21	0.251049	0.1866	0.251049
ENSG00000205758	CRYZL1	chr21	0.251739	0.313508	0.251739
ENSG00000205726	ITSN1	chr21	0.212834	0.433046	0.212834
ENSG00000241837	ATP5O	chr21	-0.267175	-0.27856	-0.267175
ENSG00000243927	MRPS6	chr21	-0.0999464	0.0259789	-0.0999464
ENSG00000198743	SLC5A3	chr21	0.120866	0.0863145	0.120866
ENSG00000159228	CBR1	chr21	0.347205	0.374792	0.347205
ENSG00000159231	CBR3	chr21	0.412544	0.632242	0.412544
ENSG00000159256	MORC3	chr21	0.256329	0.245572	0.256329
ENSG00000159259	CHAF1B	chr21	0.162668	0.0345723	0.162668
ENSG00000159267	HLCS	chr21	0.332731	0.212217	0.332731
ENSG00000183527	PSMG1	chr21	-0.0453131	-0.010857	-0.0453131
ENSG00000205581	HMGN1	chr21	0.386312	0.456553	0.386312
ENSG00000157578	LCA5L	chr21	-0.0159252		-0.0159252
ENSG00000160200	CBS	chr21	0.262536	0.502485	0.262536
ENSG00000160201	U2AF1	chr21	-0.0751666	0.129483	-0.0751666
ENSG00000160208	RRP1B	chr21	0.109215	0.192819	0.109215
ENSG00000160209	PDXK	chr21	0.379894	0.277646	0.379894
ENSG00000160213	CSTB	chr21	0.576839	0.713991	0.576839
ENSG00000160214	RRP1	chr21	0.0834747	0.0741016	0.0834747
ENSG00000241945	PWP2H	chr21	0.0176388	-0.0382616	0.0176388
ENSG00000160221	C21orf33	chr21	0.29955	0.510294	0.29955
ENSG00000141959	PFKL	chr21	0.791667	0.210624	0.791667
ENSG00000184787	UBE2G2	chr21	0.0600766	0.345729	0.0600766
ENSG00000184900	SUMO3	chr21	0.439257	0.668694	0.439257
ENSG00000183255	PTTG1IP	chr21	0.700706	0.119333	0.700706
ENSG00000197381	ADARB1	chr21	0.265048	-0.0997185	0.265048
ENSG00000186866	POFUT2	chr21	0.552386	0.0252382	0.552386
ENSG00000182871	COL18A1	chr21	-0.121863	-0.156765	-0.121863
ENSG00000183570	PCBP3	chr21	-0.0279119	0.0778751	-0.0279119
ENSG00000142156	COL6A1	chr21	0.327651	0.149667	0.327651
ENSG00000142173	COL6A2	chr21	0.275415	0.358982	0.275415
ENSG00000160285	LSS	chr21	0.537244	0.10781	0.537244
