# Supplementary material for: Extensive protein dosage compensation in aneuploid human cancers
Source: HighWire-hosted journal article supplement (doi:10.1101/gr.276378.121), 2022-06-14
Supplement: Supplemental_Table_S1.xlsx [file Supplemental_Table_S1.xlsx]

## Sheet: Legend Table S1
Supplemental Table 1. Information about cell lines used in our analysis
1) Cell Lines used- List of cell lines from CCLE with proteomic data, RNA seq data and aneuploidy information used in this paper.
2) Cell lines per category- Number of cell lines with chromosome arm gained, lost or neutral, per cell line.

## Sheet: Cell Lines used
DepMap_ID	cell_line_name	stripped_cell_line_name	CCLE_Name	alias	COSMICID	sex	source	Achilles_n_replicates	cell_line_NNMD	RRID	WTSI_Master_Cell_ID	sample_collection_site	primary_or_metastasis	primary_disease	Subtype	age	Sanger_Model_ID	lineage	lineage_subtype	lineage_sub_subtype	lineage_molecular_subtype
ACH-000001	NIH:OVCAR-3	NIHOVCAR3	NIHOVCAR3_OVARY	OVCAR3	905933	Female	ATCC	#N/A	#N/A	CVCL_0465	2201	ascites	Metastasis	Ovarian Cancer	Adenocarcinoma, high grade serous	60	SIDM00105	ovary	ovary_adenocarcinoma	high_grade_serous	#N/A
ACH-000004	HEL	HEL	HEL_HAEMATOPOIETIC_AND_LYMPHOID_TISSUE	#N/A	907053	Male	DSMZ	2	-3.0792	CVCL_0001	783	haematopoietic_and_lymphoid_tissue	#N/A	Leukemia	Acute Myelogenous Leukemia (AML), M6 (Erythroleukemia)	30	SIDM00594	blood	AML	M6	#N/A
ACH-000005	HEL 92.1.7	HEL9217	HEL9217_HAEMATOPOIETIC_AND_LYMPHOID_TISSUE	#N/A	#N/A	Male	ATCC	2	-2.40441	CVCL_2481	#N/A	bone_marrow	#N/A	Leukemia	Acute Myelogenous Leukemia (AML), M6 (Erythroleukemia)	30	SIDM00593	blood	AML	M6	#N/A
ACH-000006	MONO-MAC-6	MONOMAC6	MONOMAC6_HAEMATOPOIETIC_AND_LYMPHOID_TISSUE	#N/A	908148	Male	DSMZ	#N/A	#N/A	CVCL_1426	2167	haematopoietic_and_lymphoid_tissue	Primary	Leukemia	Acute Myelogenous Leukemia (AML), M5 (Eosinophilic/Monocytic)	64	SIDM01023	blood	AML	M5	#N/A
ACH-000007	LS513	LS513	LS513_LARGE_INTESTINE	#N/A	907795	Male	ATCC	2	-2.58671	CVCL_1386	569	large_intestine	Primary	Colon/Colorectal Cancer	Adenocarcinoma	63	SIDM00677	colorectal	colorectal_adenocarcinoma	#N/A	#N/A
ACH-000008	A101D	A101D	A101D_SKIN	#N/A	910921	Male	ATCC	#N/A	#N/A	CVCL_1057	1806	skin	#N/A	Skin Cancer	Melanoma	56	SIDM00801	skin	melanoma	#N/A	#N/A
ACH-000012	HCC827	HCC827	HCC827_LUNG	#N/A	1240146	Female	ATCC	3	-4.243	CVCL_2063	354	lung	Primary	Lung Cancer	Non-Small Cell Lung Cancer (NSCLC), Adenocarcinoma	39	SIDM01067	lung	NSCLC	NSCLC_adenocarcinoma	#N/A
ACH-000014	Hs 294T	HS294T	HS294T_SKIN	A101D, Hs 294.T	#N/A	Male	ATCC	2	-3.48499	CVCL_0331	#N/A	lymph_node	Metastasis	Skin Cancer	Melanoma	56	SIDM00800	skin	melanoma	#N/A	#N/A
ACH-000015	NCI-H1581	NCIH1581	NCIH1581_LUNG	NCI-H2077	908471	Male	ATCC	2	-4.22616	CVCL_1479	1237	lung	Primary	Lung Cancer	Non-Small Cell Lung Cancer (NSCLC), Large Cell Carcinoma	44	SIDM00748	lung	NSCLC	NSCLC_large_cell	#N/A
ACH-000018	T24	T24	T24_URINARY_TRACT	#N/A	724812	Female	ATCC	2	-2.94569	CVCL_0554	1455	urinary_tract	Primary	Bladder Cancer	Carcinoma	81	SIDM01184	urinary_tract	bladder_carcinoma	#N/A	#N/A
ACH-000019	MCF7	MCF7	MCF7_BREAST	#N/A	905946	Female	ATCC	2	-2.49368	CVCL_0031	588	pleural_effusion	Metastasis	Breast Cancer	Carcinoma	69	SIDM00148	breast	breast_carcinoma	ERpos_HER2neg	luminal
ACH-000021	NCI-H1693	NCIH1693	NCIH1693_LUNG	#N/A	687802	Female	ATCC	4	-3.65051	CVCL_1488	634	lymph_node	Metastasis	Lung Cancer	Non-Small Cell Lung Cancer (NSCLC), Adenocarcinoma	55	SIDM00742	lung	NSCLC	NSCLC_adenocarcinoma	#N/A
ACH-000023	PA-TU-8988T	PATU8988T	PATU8988T_PANCREAS	#N/A	1240201	Female	DSMZ	#N/A	#N/A	CVCL_1847	1242	liver	Metastasis	Pancreatic Cancer	Ductal Adenocarcinoma, exocrine	64	SIDM00453	pancreas	exocrine	exocrine_adenocarcinoma	#N/A
ACH-000024	OPM-2	OPM2	OPM2_HAEMATOPOIETIC_AND_LYMPHOID_TISSUE	#N/A	909249	Female	DSMZ	2	-3.99218	CVCL_1625	112	haematopoietic_and_lymphoid_tissue	Primary	Myeloma	Multiple Myeloma	56	SIDM00457	plasma_cell	multiple_myeloma	#N/A	#N/A
ACH-000028	KPL-1	KPL1	KPL1_BREAST	#N/A	#N/A	Female	DSMZ	3	-3.41465	CVCL_2094	#N/A	pleural_effusion	Metastasis	Breast Cancer	Carcinoma	50	SIDM00147	breast	breast_carcinoma	ERpos_HER2neg	luminal
ACH-000030	PC-14	PC14	PC14_LUNG	#N/A	753608	Male	RIKEN	3	-5.25734	CVCL_1640	198	lung	Primary	Lung Cancer	Non-Small Cell Lung Cancer (NSCLC), Adenocarcinoma	#N/A	SIDM00237	lung	NSCLC	NSCLC_adenocarcinoma	#N/A
ACH-000035	NCI-H1650	NCIH1650	NCIH1650_LUNG	#N/A	687800	Male	ATCC	2	-3.0233	CVCL_1483	1548	pleural_effusion	Metastasis	Lung Cancer	Non-Small Cell Lung Cancer (NSCLC), Adenocarcinoma	27	SIDM00745	lung	NSCLC	NSCLC_adenocarcinoma	#N/A
ACH-000039	SK-N-MC	SKNMC	SKNMC_BONE	#N/A	#N/A	Female	ATCC	3	-2.62797	CVCL_0530	#N/A	bone	Metastasis	Bone Cancer	Ewings Sarcoma	14	SIDM00634	bone	Ewing_sarcoma	#N/A	EWS_FLI
ACH-000040	U-118 MG	U118MG	U118MG_CENTRAL_NERVOUS_SYSTEM	#N/A	687588	Male	ATCC	2	-3.7855	CVCL_0633	7	central_nervous_system	Primary	Brain Cancer	Astrocytoma	#N/A	SIDM01193	central_nervous_system	glioma	astrocytoma	#N/A
ACH-000042	Panc 02.03	PANC0203	PANC0203_PANCREAS	#N/A	1298475	Female	ATCC	4	-3.3423	CVCL_1633	1838	pancreas	Primary	Pancreatic Cancer	Ductal Adenocarcinoma, exocrine	70	SIDM01139	pancreas	exocrine	exocrine_adenocarcinoma	#N/A
ACH-000050	NCI-H929	NCIH929	NCIH929_HAEMATOPOIETIC_AND_LYMPHOID_TISSUE	#N/A	724825	Female	ATCC	#N/A	#N/A	CVCL_1600	1230	pleural_effusion	Metastasis	Myeloma	Multiple Myeloma, plasmacytoma	62	SIDM01148	plasma_cell	multiple_myeloma	plasmacytoma	#N/A
ACH-000053	KARPAS-299	KARPAS299	KARPAS299_HAEMATOPOIETIC_AND_LYMPHOID_TISSUE	#N/A	907273	Male	Academic lab	3	-5.3513	CVCL_1324	906	haematopoietic_and_lymphoid_tissue	#N/A	Lymphoma	T-cell, Non-Hodgkins, Anaplastic Large Cell (ALCL)	25	SIDM01010	lymphocyte	non_hodgkin_lymphoma	t_cell_ALCL	#N/A
ACH-000054	HT-1080	HT1080	HT1080_SOFT_TISSUE	#N/A	907064	Male	ATCC	2	-3.87194	CVCL_0317	1391	soft_tissue	Metastasis	Sarcoma	Fibrosarcoma	35	SIDM00828	soft_tissue	fibrosarcoma	#N/A	#N/A
ACH-000062	RERF-LC-MS	RERFLCMS	RERFLCMS_LUNG	#N/A	910931	Male	JCRB	#N/A	#N/A	CVCL_1655	2051	lung	Primary	Lung Cancer	Non-Small Cell Lung Cancer (NSCLC), Adenocarcinoma	#N/A	SIDM00355	lung	NSCLC	NSCLC_adenocarcinoma	#N/A
ACH-000065	OCI-AML5	OCIAML5	OCIAML5_HAEMATOPOIETIC_AND_LYMPHOID_TISSUE	#N/A	1330983	Male	DSMZ	#N/A	#N/A	CVCL_1620	2130	haematopoietic_and_lymphoid_tissue	Primary	Leukemia	Acute Myelogenous Leukemia (AML)	77	SIDM00461	blood	AML	#N/A	#N/A
ACH-000068	REC-1	REC1	REC1_HAEMATOPOIETIC_AND_LYMPHOID_TISSUE	#N/A	#N/A	Male	DSMZ	#N/A	#N/A	CVCL_1884	#N/A	lymph_node	#N/A	Lymphoma	B-cell, Non-Hodgkins, Mantle Cell	61	#N/A	lymphocyte	non_hodgkin_lymphoma	b_cell_mantle_cell	#N/A
ACH-000070	697	697	697_HAEMATOPOIETIC_AND_LYMPHOID_TISSUE	#N/A	906800	Male	DSMZ	2	-3.46314	CVCL_0079	63	bone_marrow	Primary	Leukemia	Acute Lymphoblastic Leukemia (ALL), B-cell	12	SIDM01076	blood	ALL	b_cell	#N/A
ACH-000075	U-87 MG	U87MG	U87MG_CENTRAL_NERVOUS_SYSTEM	#N/A	687590	Unknown	ATCC	2	-2.31896	CVCL_0022	549	central_nervous_system	Primary	Brain Cancer	Astrocytoma	44	SIDM01189	central_nervous_system	glioma	astrocytoma	#N/A
ACH-000087	SK-ES-1	SKES1	SKES1_BONE	#N/A	684072	Male	ATCC	2	-3.08213	CVCL_0627	41	bone	Primary	Bone Cancer	Ewings Sarcoma	18	SIDM01111	bone	Ewing_sarcoma	#N/A	EWS_FLI
ACH-000090	PC-3	PC3	PC3_PROSTATE	#N/A	905934	Male	ATCC	0	-2.13462	CVCL_0035	911	bone	Metastasis	Prostate Cancer	Adenocarcinoma	62	SIDM00088	prostate	prostate_adenocarcinoma	#N/A	#N/A
ACH-000091	OV56	OV56	OV56_OVARY	#N/A	1480362	Female	ECACC	#N/A	#N/A	CVCL_2673	686	ascites	Metastasis	Ovarian Cancer	Adenocarcinoma, serous	46	SIDM00475	ovary	ovary_adenocarcinoma	serous	#N/A
ACH-000096	G-401	G401	G401_SOFT_TISSUE	#N/A	907299	Male	ATCC	2	-2.40531	CVCL_0270	962	kidney	Primary	Rhabdoid	Malignant Rhabdoid Tumor	0.25	SIDM00856	kidney	malignant_rhabdoid_tumor	#N/A	#N/A
ACH-000097	ZR-75-1	ZR751	ZR751_BREAST	#N/A	#N/A	Female	ATCC	2	-4.29023	CVCL_0588	#N/A	ascites	Metastasis	Breast Cancer	Breast Ductal Carcinoma	63	SIDM00314	breast	breast_ductal_carcinoma	ERpos_HER2neg	luminal
ACH-000098	GAMG	GAMG	GAMG_CENTRAL_NERVOUS_SYSTEM	#N/A	906868	Female	DSMZ	2	-5.02631	CVCL_1226	1174	central_nervous_system	Primary	Brain Cancer	Glioblastoma	42	SIDM01055	central_nervous_system	glioma	glioblastoma	#N/A
ACH-000100	RH-41	RH41	RH41_SOFT_TISSUE	#N/A	1240210	Female	DSMZ	0	-2.89398	CVCL_2176	2052	liver	Metastasis	Sarcoma	Rhabdomyosarcoma, alveolar	#N/A	SIDM00426	soft_tissue	rhabdomyosarcoma	alveolar	#N/A
ACH-000109	NCI-H3255	NCIH3255	NCIH3255_LUNG	#N/A	#N/A	Female	Academic lab	#N/A	#N/A	CVCL_6831	#N/A	lung	Primary	Lung Cancer	Non-Small Cell Lung Cancer (NSCLC), Adenocarcinoma	#N/A	SIDM00046	lung	NSCLC	NSCLC_adenocarcinoma	#N/A
ACH-000111	HCC1187	HCC1187	HCC1187_BREAST	#N/A	749711	Female	ATCC	2	-2.76223	CVCL_1247	1644	breast	Primary	Breast Cancer	Breast Ductal Carcinoma	41	SIDM00885	breast	breast_ductal_carcinoma	ERneg_HER2neg	basal_A
ACH-000114	SU.86.86	SU8686	SU8686_PANCREAS	#N/A	1240218	Female	ATCC	1	-3.97051	CVCL_3881	268	liver	Metastasis	Pancreatic Cancer	Ductal Adenocarcinoma, exocrine	57	SIDM01188	pancreas	exocrine	exocrine_adenocarcinoma	#N/A
ACH-000115	VCaP	VCAP	VCAP_PROSTATE	#N/A	1299075	Male	ATCC	2	-2.86809	CVCL_2235	2154	bone	Metastasis	Prostate Cancer	Adenocarcinoma	59	SIDM01077	prostate	prostate_adenocarcinoma	#N/A	#N/A
ACH-000117	EFM-192A	EFM192A	EFM192A_BREAST	#N/A	1290798	Female	DSMZ	#N/A	#N/A	CVCL_1812	1187	pleural_effusion	Metastasis	Breast Cancer	Adenocarcinoma	46	SIDM01002	breast	breast_adenocarcinoma	ERpos_HER2pos	HER2_amp
ACH-000118	HUP-T3	HUPT3	HUPT3_PANCREAS	#N/A	907285	Male	DSMZ	4	-4.52154	CVCL_1299	109	ascites	Metastasis	Pancreatic Cancer	Ductal Adenocarcinoma, exocrine	66	SIDM00533	pancreas	exocrine	exocrine_adenocarcinoma	#N/A
ACH-000132	JHOS-2	JHOS2	JHOS2_OVARY	#N/A	1479995	Female	RIKEN	1	-4.49849	CVCL_4647	436	ovary	Primary	Ovarian Cancer	Adenocarcinoma, high grade serous	45	SIDM00305	ovary	ovary_adenocarcinoma	high_grade_serous	#N/A
ACH-000138	CFPAC-1	CFPAC1	CFPAC1_PANCREAS	#N/A	906821	Male	ATCC	3	-3.74821	CVCL_1119	572	liver	Metastasis	Pancreatic Cancer	Ductal Adenocarcinoma, exocrine	26	SIDM00130	pancreas	exocrine	exocrine_adenocarcinoma	#N/A
ACH-000146	THP-1	THP1	THP1_HAEMATOPOIETIC_AND_LYMPHOID_TISSUE	#N/A	909771	Male	ATCC	3	-5.01403	CVCL_0006	770	haematopoietic_and_lymphoid_tissue	Primary	Leukemia	Acute Myelogenous Leukemia (AML), M5 (Eosinophilic/Monocytic)	1	SIDM01172	blood	AML	M5	#N/A
ACH-000147	T-47D	T47D	T47D_BREAST	#N/A	905945	Female	ATCC	2	-4.80474	CVCL_0553	1286	pleural_effusion	Metastasis	Breast Cancer	Breast Ductal Carcinoma	54	SIDM00097	breast	breast_ductal_carcinoma	ERpos_HER2neg	luminal
ACH-000151	JM1	JM1	JM1_HAEMATOPOIETIC_AND_LYMPHOID_TISSUE	#N/A	1327768	Male	ATCC	2	-2.4896	CVCL_3532	2096	haematopoietic_and_lymphoid_tissue	#N/A	Leukemia	Acute Lymphoblastic Leukemia (ALL), B-cell	#N/A	SIDM00689	blood	ALL	b_cell	#N/A
ACH-000153	NCI-H2052	NCIH2052	NCIH2052_PLEURA	#N/A	688058	Male	ATCC	1	-2.70454	CVCL_1518	1485	pleural_effusion	Metastasis	Lung Cancer	Mesothelioma	65	SIDM00713	lung	mesothelioma	#N/A	#N/A
ACH-000155	SW 1990	SW1990	SW1990_PANCREAS	#N/A	910907	Male	ATCC	#N/A	#N/A	CVCL_1723	1912	spleen	Primary	Pancreatic Cancer	Ductal Adenocarcinoma, exocrine	56	SIDM01165	pancreas	exocrine	exocrine_adenocarcinoma	#N/A
ACH-000158	OCI-LY3	OCILY3	OCILY3_HAEMATOPOIETIC_AND_LYMPHOID_TISSUE	#N/A	#N/A	Male	Academic lab	#N/A	#N/A	CVCL_8800	#N/A	bone_marrow	Primary	Lymphoma	Diffuse Large B-cell Lymphoma (DLBCL)	#N/A	#N/A	lymphocyte	non_hodgkin_lymphoma	DLBCL	#N/A
ACH-000159	OS-RC-2	OSRC2	OSRC2_KIDNEY	#N/A	909250	Male	RIKEN	2	-4.23849	CVCL_1626	1674	kidney	Primary	Kidney Cancer	Renal Cell Carcinoma	#N/A	SIDM00239	kidney	renal_cell_carcinoma	#N/A	#N/A
ACH-000161	COR-L105	CORL105	CORL105_LUNG	#N/A	906805	Male	ECACC	1	-3.18806	CVCL_1138	22	pleural_effusion	Metastasis	Lung Cancer	Non-Small Cell Lung Cancer (NSCLC), Adenocarcinoma	#N/A	SIDM00513	lung	NSCLC	NSCLC_adenocarcinoma	#N/A
ACH-000164	PANC-1	PANC1	PANC1_PANCREAS	#N/A	#N/A	Male	ATCC	2	-4.71034	CVCL_0480	#N/A	pancreas	Primary	Pancreatic Cancer	Ductal Adenocarcinoma, exocrine	#N/A	SIDM00610	pancreas	exocrine	exocrine_adenocarcinoma	#N/A
ACH-000169	RD	RD	RD_SOFT_TISSUE	#N/A	909264	Female	ATCC	2	-4.69379	CVCL_1649	1763	soft_tissue	Primary	Sarcoma	Rhabdomyosarcoma, embryonal	7	SIDM00847	soft_tissue	rhabdomyosarcoma	embryonal	#N/A
ACH-000188	SCC-25	SCC25	SCC25_UPPER_AERODIGESTIVE_TRACT	#N/A	910701	Male	ATCC	2	-3.55165	CVCL_1682	1419	upper_aerodigestive_tract	Primary	Head and Neck Cancer	Squamous Cell Carcinoma	70	SIDM01082	upper_aerodigestive	upper_aerodigestive_squamous	#N/A	#N/A
ACH-000190	HD-MY-Z	HDMYZ	HDMYZ_HAEMATOPOIETIC_AND_LYMPHOID_TISSUE	#N/A	907050	Male	DSMZ	2	-3.0162	CVCL_1273	883	pleural_effusion	#N/A	Lymphoma	B-cell, Hodgkins	29	SIDM01063	lymphocyte	hodgkin_lymphoma	#N/A	#N/A
ACH-000192	MFE-280	MFE280	MFE280_ENDOMETRIUM	#N/A	908129	Female	DSMZ	#N/A	#N/A	CVCL_1405	1540	endometrium	Primary	Endometrial/Uterine Cancer	Endometrial Adenocarcinoma	77	SIDM00335	uterus	endometrial_adenocarcinoma	#N/A	#N/A
ACH-000198	EOL-1	EOL1	EOL1_HAEMATOPOIETIC_AND_LYMPHOID_TISSUE	#N/A	906856	Male	DSMZ	2	-4.37441	CVCL_0258	426	haematopoietic_and_lymphoid_tissue	#N/A	Leukemia	Acute Myelogenous Leukemia (AML), M5 (Eosinophilic/Monocytic)	33	SIDM00277	blood	AML	M5	#N/A
ACH-000201	A-204	A204	A204_SOFT_TISSUE	#N/A	910784	Female	ATCC	#N/A	#N/A	CVCL_1058	349	soft_tissue	Primary	Rhabdoid	Malignant Rhabdoid Tumor	1	SIDM00798	soft_tissue	malignant_rhabdoid_tumor	#N/A	#N/A
ACH-000202	COLO-320	COLO320	COLO320_LARGE_INTESTINE	#N/A	#N/A	Female	DSMZ	3	-1.64143	CVCL_1989	#N/A	large_intestine	Primary	Colon/Colorectal Cancer	Adenocarcinoma	55	SIDM00071	colorectal	colorectal_adenocarcinoma	#N/A	#N/A
ACH-000207	Detroit 562	DETROIT562	DETROIT562_UPPER_AERODIGESTIVE_TRACT	#N/A	906837	Female	ATCC	2	-2.25698	CVCL_1171	2075	pleural_effusion	Metastasis	Head and Neck Cancer	Squamous Cell Carcinoma, pharynx	#N/A	SIDM00831	upper_aerodigestive	upper_aerodigestive_squamous	pharynx	#N/A
ACH-000209	SNU-1079	SNU1079	SNU1079_BILIARY_TRACT	#N/A	#N/A	Male	KCLB	2	-2.49771	CVCL_5008	#N/A	biliary_tract	#N/A	Bile Duct Cancer	Cholangiocarcinoma, intrahepatic	#N/A	SIDM00164	bile_duct	cholangiocarcinoma	intrahepatic	#N/A
ACH-000211	Daoy	DAOY	DAOY_CENTRAL_NERVOUS_SYSTEM	#N/A	906833	Male	ATCC	2	-4.68543	CVCL_1167	2150	central_nervous_system	Primary	Brain Cancer	Medulloblastoma	4	SIDM00887	central_nervous_system	medulloblastoma	#N/A	non_MYC
ACH-000212	CAL-120	CAL120	CAL120_BREAST	#N/A	906826	Female	DSMZ	2	-4.0642	CVCL_1104	1748	pleural_effusion	Metastasis	Breast Cancer	Carcinoma	43	SIDM00940	breast	breast_carcinoma	ERneg_HER2neg	basal_B
ACH-000213	HUP-T4	HUPT4	HUPT4_PANCREAS	#N/A	907286	Male	DSMZ	#N/A	#N/A	CVCL_1300	618	ascites	Metastasis	Pancreatic Cancer	Ductal Adenocarcinoma, exocrine	60	SIDM00531	pancreas	exocrine	exocrine_adenocarcinoma	#N/A
ACH-000217	JHH-6	JHH6	JHH6_LIVER	#N/A	1240159	Female	HSRRB	2	-4.97004	CVCL_2788	1824	liver	Primary	Liver Cancer	Hepatocellular Carcinoma	57	SIDM00615	liver	hepatocellular_carcinoma	#N/A	#N/A
ACH-000219	A-375	A375	A375_SKIN	#N/A	906793	Female	ATCC	2	-4.14102	CVCL_0132	953	skin	Primary	Skin Cancer	Melanoma	54	SIDM00795	skin	melanoma	#N/A	#N/A
ACH-000222	AsPC-1	ASPC1	ASPC1_PANCREAS	#N/A	910702	Female	ATCC	3	-2.6741	CVCL_0152	59	ascites	Metastasis	Pancreatic Cancer	Ductal Adenocarcinoma, exocrine	62	SIDM00899	pancreas	exocrine	exocrine_adenocarcinoma	#N/A
ACH-000223	HCC1937	HCC1937	HCC1937_BREAST	#N/A	749714	Female	ATCC	2	-5.06464	CVCL_0290	936	breast	Primary	Breast Cancer	Breast Ductal Carcinoma	24	SIDM00874	breast	breast_ductal_carcinoma	ERneg_HER2neg	basal_A
ACH-000234	Caki-2	CAKI2	CAKI2_KIDNEY	#N/A	#N/A	Male	ATCC	2	-2.95329	CVCL_0235	#N/A	kidney	Primary	Kidney Cancer	Renal Carcinoma, clear cell	69	#N/A	kidney	renal_cell_carcinoma	clear_cell	#N/A
ACH-000235	Panc 04.03	PANC0403	PANC0403_PANCREAS	#N/A	1298476	Male	ATCC	4	-5.39401	CVCL_1636	2123	pancreas	Primary	Pancreatic Cancer	Ductal Adenocarcinoma, exocrine	70	SIDM01137	pancreas	exocrine	exocrine_adenocarcinoma	#N/A
ACH-000236	SW1417	SW1417	SW1417_LARGE_INTESTINE	#N/A	909747	Female	ATCC	#N/A	#N/A	CVCL_1717	974	Colon	Primary	Colon/Colorectal Cancer	Adenocarcinoma	53	SIDM00812	colorectal	colorectal_adenocarcinoma	#N/A	#N/A
ACH-000239	HuG1-N	HUG1N	HUG1N_STOMACH	#N/A	#N/A	Male	RIKEN	0	-1.07371	CVCL_4846	#N/A	stomach	Metastasis	Gastric Cancer	Adenocarcinoma, tubular	55	#N/A	gastric	gastric_adenocarcinoma	tubular	#N/A
ACH-000242	RT4	RT4	RT4_URINARY_TRACT	#N/A	687455	Male	ATCC	0	-1.31895	CVCL_0036	1309	urinary_tract	Primary	Bladder Cancer	Transitional Cell Carcinoma	63	SIDM01085	urinary_tract	bladder_carcinoma	bladder_transitional_cell	#N/A
ACH-000243	DAN-G	DANG	DANG_PANCREAS	#N/A	1290797	Female	DSMZ	4	-4.72455	CVCL_0243	871	pancreas	#N/A	Pancreatic Cancer	Ductal Adenocarcinoma, exocrine	#N/A	SIDM00950	pancreas	exocrine	exocrine_adenocarcinoma	#N/A
ACH-000247	OCUM-1	OCUM1	OCUM1_STOMACH	#N/A	1298358	Female	HSRRB	2	-3.15758	CVCL_3084	1712	stomach	Metastasis	Gastric Cancer	Adenocarcinoma	38	SIDM00568	gastric	gastric_adenocarcinoma	diffuse_gastric	#N/A
ACH-000248	AU565	AU565	AU565_BREAST	#N/A	910704	Female	ATCC	2	-2.85514	CVCL_1074	726	pleural_effusion	Metastasis	Breast Cancer	Adenocarcinoma	43	SIDM00898	breast	breast_adenocarcinoma	ERneg_HER2pos	HER2_amp
ACH-000250	KMRC-20	KMRC20	KMRC20_KIDNEY	#N/A	1298169	Unknown	HSRRB	2	-4.98923	CVCL_2986	1515	kidney	Primary	Kidney Cancer	Renal Cell Carcinoma	#N/A	SIDM00609	kidney	renal_cell_carcinoma	#N/A	#N/A
ACH-000255	LMSU	LMSU	LMSU_STOMACH	#N/A	#N/A	Female	RIKEN	2	-3.48771	CVCL_4849	#N/A	lymph_node	Metastasis	Gastric Cancer	Adenocarcinoma	27	#N/A	gastric	gastric_adenocarcinoma	#N/A	#N/A
ACH-000260	SK-N-AS	SKNAS	SKNAS_AUTONOMIC_GANGLIA	#N/A	724828	Female	ATCC	3	-5.61035	CVCL_1700	1480	bone_marrow	Metastasis	Neuroblastoma	#N/A	6	SIDM01101	peripheral_nervous_system	neuroblastoma	#N/A	#N/A
ACH-000263	KASUMI-1	KASUMI1	KASUMI1_HAEMATOPOIETIC_AND_LYMPHOID_TISSUE	#N/A	907275	Male	DSMZ	2	-1.89045	CVCL_0589	1196	haematopoietic_and_lymphoid_tissue	Primary	Leukemia	Acute Myelogenous Leukemia (AML), M2 (Myeloblastic)	7	SIDM01005	blood	AML	M2	#N/A
ACH-000264	Calu-6	CALU6	CALU6_LUNG	#N/A	724859	Female	ATCC	2	-5.60367	CVCL_0236	1844	pleural_effusion	Metastasis	Lung Cancer	Non-Small Cell Lung Cancer (NSCLC), unspecified	61	SIDM00921	lung	NSCLC	#N/A	#N/A
ACH-000265	KP4	KP4	KP4_PANCREAS	#N/A	753572	Male	RIKEN	4	-3.87324	CVCL_1338	708	ascites	Metastasis	Pancreatic Cancer	Ductal Adenocarcinoma, exocrine	50	SIDM00301	pancreas	exocrine	exocrine_adenocarcinoma	#N/A
ACH-000276	HCC38	HCC38	HCC38_BREAST	#N/A	749717	Female	ATCC	1	-3.26708	CVCL_1267	1318	breast	Primary	Breast Cancer	Breast Ductal Carcinoma	50	SIDM00675	breast	breast_ductal_carcinoma	ERneg_HER2neg	basal_A
ACH-000278	COV362	COV362	COV362_OVARY	#N/A	#N/A	Female	ECACC	3	-3.26175	CVCL_2420	#N/A	pleural_effusion	Metastasis	Ovarian Cancer	Adenocarcinoma, high grade serous	#N/A	#N/A	ovary	ovary_adenocarcinoma	high_grade_serous	#N/A
ACH-000281	KP-2	KP2	KP2_PANCREAS	#N/A	1298218	Female	HSRRB	3	-2.43505	CVCL_3004	746	pancreas	Primary	Pancreatic Cancer	Ductal Adenocarcinoma, exocrine	65	SIDM00582	pancreas	exocrine	exocrine_adenocarcinoma	#N/A
ACH-000288	BT-549	BT549	BT549_BREAST	#N/A	905951	Female	ATCC	3	-4.53199	CVCL_1092	1835	breast	Primary	Breast Cancer	Breast Ductal Carcinoma	72	SIDM00122	breast	breast_ductal_carcinoma	ERneg_HER2neg	basal_B
ACH-000291	OV-90	OV90	OV90_OVARY	#N/A	1240197	Female	ATCC	2	-4.76328	CVCL_3768	1327	ascites	Metastasis	Ovarian Cancer	Adenocarcinoma, high grade serous	64	SIDM01141	ovary	ovary_adenocarcinoma	high_grade_serous	#N/A
ACH-000304	WM-115	WM115	WM115_SKIN	#N/A	909784	Female	ATCC	2	-2.36871	CVCL_0040	1000	skin	Metastasis	Skin Cancer	Melanoma	59	SIDM01000	skin	melanoma	#N/A	#N/A
ACH-000309	SK-LU-1	SKLU1	SKLU1_LUNG	#N/A	909721	Female	ATCC	#N/A	#N/A	CVCL_0629	233	lung	Primary	Lung Cancer	Non-Small Cell Lung Cancer (NSCLC), Adenocarcinoma	60	SIDM01108	lung	NSCLC	NSCLC_adenocarcinoma	#N/A
ACH-000311	NCI-H2122	NCIH2122	NCIH2122_LUNG	#N/A	722046	Female	ATCC	4	-3.06037	CVCL_1531	1015	pleural_effusion	Metastasis	Lung Cancer	Non-Small Cell Lung Cancer (NSCLC), Adenocarcinoma	46	SIDM00702	lung	NSCLC	NSCLC_adenocarcinoma	#N/A
ACH-000315	KARPAS-422	KARPAS422	KARPAS422_HAEMATOPOIETIC_AND_LYMPHOID_TISSUE	#N/A	907274	Female	DSMZ	2	-2.76418	CVCL_1325	1973	pleural_effusion	Metastasis	Lymphoma	Diffuse Large B-cell Lymphoma (DLBCL)	73	SIDM01008	lymphocyte	non_hodgkin_lymphoma	DLBCL	#N/A
ACH-000318	TE-10	TE10	TE10_OESOPHAGUS	#N/A	753622	Male	RIKEN	2	-3.47154	CVCL_1760	1561	oesophagus	Primary	Esophageal Cancer	Squamous Cell Carcinoma	#N/A	SIDM00349	esophagus	esophagus_squamous	#N/A	#N/A
ACH-000330	EFM-19	EFM19	EFM19_BREAST	#N/A	906851	Female	DSMZ	2	-2.87909	CVCL_0253	1786	pleural_effusion	Metastasis	Breast Cancer	Breast Ductal Carcinoma	50	SIDM01056	breast	breast_ductal_carcinoma	ERpos_HER2neg	luminal
ACH-000335	MSTO-211H	MSTO211H	MSTO211H_PLEURA	#N/A	908152	Male	ATCC	2	-2.29939	CVCL_1430	209	pleural_effusion	Metastasis	Lung Cancer	Mesothelioma	62	SIDM00640	lung	mesothelioma	#N/A	#N/A
ACH-000343	NCI-H522	NCIH522	NCIH522_LUNG	#N/A	905944	Male	ATCC	2	-3.96372	CVCL_1567	1224	lung	Primary	Lung Cancer	Non-Small Cell Lung Cancer (NSCLC), Adenocarcinoma	60	SIDM00116	lung	NSCLC	NSCLC_adenocarcinoma	#N/A
ACH-000347	QGP-1	QGP1	QGP1_PANCREAS	#N/A	1298534	Male	HSRRB	0	-0.590327	CVCL_3143	469	pancreas	Primary	Pancreatic Cancer	Somatostatinoma	61	SIDM00360	pancreas	endocrine	somatostatinoma	#N/A
ACH-000348	RPMI-7951	RPMI7951	RPMI7951_SKIN	#N/A	910903	Female	ATCC	2	-6.1356	CVCL_1666	1909	lymph_node	Metastasis	Skin Cancer	Melanoma	18	SIDM01087	skin	melanoma	#N/A	#N/A
ACH-000349	HCC1500	HCC1500	HCC1500_BREAST	#N/A	1303900	Female	ATCC	#N/A	#N/A	CVCL_1254	653	breast	Primary	Breast Cancer	Breast Ductal Carcinoma	32	SIDM00879	breast	breast_ductal_carcinoma	ERpos_HER2neg	luminal
ACH-000350	COLO-678	COLO678	COLO678_LARGE_INTESTINE	#N/A	910689	Male	DSMZ	3	-2.07828	CVCL_1129	2148	lymph_node	Metastasis	Colon/Colorectal Cancer	Adenocarcinoma	69	SIDM00957	colorectal	colorectal_adenocarcinoma	#N/A	#N/A
ACH-000351	MKN1	MKN1	MKN1_STOMACH	#N/A	908138	Male	HSRRB	#N/A	#N/A	CVCL_1415	1647	lymph_node	Metastasis	Gastric Cancer	Adenocarcinoma	72	SIDM00271	gastric	gastric_adenocarcinoma	#N/A	#N/A
ACH-000356	MKN-45	MKN45	MKN45_STOMACH	#N/A	925340	Female	HSRRB	2	-2.32997	CVCL_0434	1542	liver	Metastasis	Gastric Cancer	Adenocarcinoma	62	SIDM00247	gastric	gastric_adenocarcinoma	diffuse_gastric	#N/A
ACH-000357	JeKo-1	JEKO1	JEKO1_HAEMATOPOIETIC_AND_LYMPHOID_TISSUE	#N/A	1327765	Female	DSMZ	0	-0.817895	CVCL_1865	2118	haematopoietic_and_lymphoid_tissue	#N/A	Lymphoma	B-cell, Non-Hodgkins, Mantle Cell	78	SIDM01038	lymphocyte	non_hodgkin_lymphoma	b_cell_mantle_cell	#N/A
ACH-000361	SK-HEP-1	SKHEP1	SKHEP1_LIVER	#N/A	909719	Male	ATCC	2	-2.52661	CVCL_0525	874	ascites	Metastasis	Liver Cancer	Hepatocellular Carcinoma	52	SIDM01110	liver	hepatocellular_carcinoma	#N/A	#N/A
ACH-000362	MOLM-13	MOLM13	MOLM13_HAEMATOPOIETIC_AND_LYMPHOID_TISSUE	#N/A	1330947	Male	DSMZ	3	-3.1529	CVCL_2119	747	haematopoietic_and_lymphoid_tissue	Primary	Leukemia	Acute Myelogenous Leukemia (AML)	20	SIDM00437	blood	AML	#N/A	#N/A
ACH-000364	U-2 OS	U2OS	U2OS_BONE	U2-OS, U-2 OS	909776	Female	ATCC	2	-3.88718	CVCL_0042	1145	bone	Primary	Bone Cancer	Osteosarcoma	15	SIDM01191	bone	osteosarcoma	#N/A	#N/A
ACH-000365	SU-DHL-4	SUDHL4	SUDHL4_HAEMATOPOIETIC_AND_LYMPHOID_TISSUE	#N/A	1331035	Male	DSMZ	2	-3.5927	CVCL_0539	1450	pleural_effusion	Metastasis	Lymphoma	Diffuse Large B-cell Lymphoma (DLBCL)	38	SIDM00405	lymphocyte	non_hodgkin_lymphoma	DLBCL	#N/A
ACH-000367	NCI-H226	NCIH226	NCIH226_LUNG	#N/A	905941	Male	ATCC	#N/A	#N/A	CVCL_1544	1221	pleural_effusion	Metastasis	Lung Cancer	Non-Small Cell Lung Cancer (NSCLC), Squamous Cell Carcinoma	#N/A	SIDM00139	lung	NSCLC	NSCLC_squamous	#N/A
ACH-000368	SNU-1105	SNU1105	SNU1105_CENTRAL_NERVOUS_SYSTEM	#N/A	#N/A	Male	KCLB	2	-3.5602	CVCL_5010	#N/A	central_nervous_system	Primary	Brain Cancer	Glioblastoma	61	#N/A	central_nervous_system	glioma	glioblastoma	#N/A
ACH-000369	MOLM-16	MOLM16	MOLM16_HAEMATOPOIETIC_AND_LYMPHOID_TISSUE	#N/A	1330948	Female	DSMZ	#N/A	#N/A	CVCL_2120	1229	haematopoietic_and_lymphoid_tissue	#N/A	Leukemia	Acute Myelogenous Leukemia (AML)	77	SIDM00435	blood	AML	#N/A	#N/A
ACH-000371	RL	RL	RL_HAEMATOPOIETIC_AND_LYMPHOID_TISSUE	#N/A	910861	Male	ATCC	2	-3.89603	CVCL_1660	1273	ascites	#N/A	Lymphoma	B-cell, Non-Hodgkins	52	SIDM01089	lymphocyte	non_hodgkin_lymphoma	b_cell	#N/A
ACH-000374	HCC1143	HCC1143	HCC1143_BREAST	#N/A	749710	Female	ATCC	2	-3.48995	CVCL_1245	1316	breast	Primary	Breast Cancer	Breast Ductal Carcinoma	52	SIDM00866	breast	breast_ductal_carcinoma	ERneg_HER2neg	basal_A
ACH-000375	G-402	G402	G402_SOFT_TISSUE	#N/A	907298	Female	ATCC	2	-3.28102	CVCL_1221	1089	kidney	Primary	Kidney Cancer	Renal Leiomyoblastoma	0.75	SIDM00855	soft_tissue	malignant_rhabdoid_tumor	renal_leiomyoblastoma	#N/A
ACH-000376	SF-295	SF295	SF295_CENTRAL_NERVOUS_SYSTEM	#N/A	905985	Female	NCI/DCTD	2	-5.90409	CVCL_1690	1164	central_nervous_system	Primary	Brain Cancer	Glioblastoma	67	SIDM00084	central_nervous_system	glioma	glioblastoma	#N/A
ACH-000378	NCI-H647	NCIH647	NCIH647_LUNG	#N/A	1240191	Male	ATCC	2	-3.10215	CVCL_1574	955	pleural_effusion	Metastasis	Lung Cancer	Non-Small Cell Lung Cancer (NSCLC), Adenosquamous Carcinoma	56	SIDM01125	lung	NSCLC	NSCLC_adenosquamous	#N/A
ACH-000380	KMS-12-BM	KMS12BM	KMS12BM_HAEMATOPOIETIC_AND_LYMPHOID_TISSUE	#N/A	907281	Female	DSMZ	0	-0.19561	CVCL_1334	2087	bone_marrow	Primary	Myeloma	Multiple Myeloma	64	SIDM01020	plasma_cell	multiple_myeloma	#N/A	#N/A
ACH-000383	OE33	OE33	OE33_OESOPHAGUS	#N/A	910549	Female	HPACC	2	-3.50742	CVCL_0471	1554	oesophagus	Primary	Esophageal Cancer	Adenocarcinoma	73	SIDM00477	esophagus	esophagus_adenocarcinoma	#N/A	#N/A
ACH-000387	TF-1	TF1	TF1_HAEMATOPOIETIC_AND_LYMPHOID_TISSUE	#N/A	#N/A	Male	ATCC	3	-4.46828	CVCL_0559	#N/A	bone_marrow	#N/A	Leukemia	Acute Myelogenous Leukemia (AML)	35	#N/A	blood	AML	#N/A	#N/A
ACH-000388	NU-DHL-1	NUDHL1	NUDHL1_HAEMATOPOIETIC_AND_LYMPHOID_TISSUE	#N/A	#N/A	Male	DSMZ	#N/A	#N/A	CVCL_1876	#N/A	lymph_node	Metastasis	Lymphoma	Diffuse Large B-cell Lymphoma (DLBCL)	73	#N/A	lymphocyte	non_hodgkin_lymphoma	DLBCL	#N/A
ACH-000390	LUDLU-1	LUDLU1	LUDLU1_LUNG	#N/A	#N/A	Male	ECACC	2	-3.98197	CVCL_2582	#N/A	lung	Primary	Lung Cancer	Non-Small Cell Lung Cancer (NSCLC), Squamous Cell Carcinoma	72	#N/A	lung	NSCLC	NSCLC_squamous	#N/A
ACH-000393	HLF	HLF	HLF_LIVER	#N/A	#N/A	Male	HSRRB	2	-3.81343	CVCL_2947	#N/A	liver	Primary	Liver Cancer	Hepatocellular Carcinoma	69	SIDM00065	liver	hepatocellular_carcinoma	#N/A	#N/A
ACH-000395	NCI-H520	NCIH520	NCIH520_LUNG	#N/A	908443	Male	ATCC	3	-2.77735	CVCL_1566	2200	lung	Primary	Lung Cancer	Non-Small Cell Lung Cancer (NSCLC), Squamous Cell Carcinoma	#N/A	SIDM01130	lung	NSCLC	NSCLC_squamous	#N/A
ACH-000396	J82	J82	J82_URINARY_TRACT	#N/A	753566	Male	ATCC	0	-1.44866	CVCL_0359	1232	urinary_tract	Primary	Bladder Cancer	Transitional Cell Carcinoma	58	SIDM00693	urinary_tract	bladder_carcinoma	bladder_transitional_cell	#N/A
ACH-000400	SK-CO-1	SKCO1	SKCO1_LARGE_INTESTINE	#N/A	909718	Male	ATCC	#N/A	#N/A	CVCL_0626	40	ascites	Metastasis	Colon/Colorectal Cancer	Adenocarcinoma	65	SIDM01096	colorectal	colorectal_adenocarcinoma	#N/A	#N/A
ACH-000403	NCI-H747	NCIH747	NCIH747_LARGE_INTESTINE	#N/A	908457	Male	ATCC	3	-3.45121	CVCL_1587	573	large_intestine	Metastasis	Colon/Colorectal Cancer	Adenocarcinoma	69	SIDM00778	colorectal	colorectal_adenocarcinoma	#N/A	#N/A
ACH-000404	K029AX	K029AX	K029AX_SKIN	#N/A	#N/A	Unknown	Academic lab	1	-2.86178	CVCL_8784	#N/A	skin	Primary	Skin Cancer	Melanoma	#N/A	#N/A	skin	melanoma	#N/A	#N/A
ACH-000406	U-937	U937	U937_HAEMATOPOIETIC_AND_LYMPHOID_TISSUE	#N/A	#N/A	Male	ATCC	3	-6.26716	CVCL_0007	#N/A	pleural_effusion	Metastasis	Leukemia	Acute Myelogenous Leukemia (AML)	37	SIDM01195	blood	AML	#N/A	#N/A
ACH-000407	SNU-685	SNU685	SNU685_ENDOMETRIUM	#N/A	#N/A	Female	KCLB	2	-4.17513	CVCL_5083	#N/A	endometrium	Primary	Endometrial/Uterine Cancer	Malignant Mixed Mullerian Tumor (MMMT)	70	SIDM00165	uterus	MMMT	#N/A	#N/A
ACH-000409	OVSAHO	OVSAHO	OVSAHO_OVARY	#N/A	#N/A	Female	HSRRB	#N/A	#N/A	CVCL_3114	#N/A	abdomen	Metastasis	Ovarian Cancer	Adenocarcinoma, high grade serous	56	#N/A	ovary	ovary_adenocarcinoma	high_grade_serous	#N/A
ACH-000411	769-P	769P	769P_KIDNEY	#N/A	910922	Female	ATCC	2	-3.25579	CVCL_1050	1186	kidney	Primary	Kidney Cancer	Renal Carcinoma, clear cell	63	SIDM00803	kidney	renal_cell_carcinoma	clear_cell	#N/A
ACH-000414	NCI-H1944	NCIH1944	NCIH1944_LUNG	#N/A	1240185	Female	ATCC	4	-3.58719	CVCL_1508	183	soft_tissue	Metastasis	Lung Cancer	Non-Small Cell Lung Cancer (NSCLC), Adenocarcinoma	62	SIDM00762	lung	NSCLC	NSCLC_adenocarcinoma	#N/A
ACH-000415	BICR 6	BICR6	BICR6_UPPER_AERODIGESTIVE_TRACT	#N/A	#N/A	Male	ECACC	2	-3.89538	CVCL_2314	#N/A	upper_aerodigestive_tract	Primary	Head and Neck Cancer	Squamous Cell Carcinoma, oral	#N/A	#N/A	upper_aerodigestive	upper_aerodigestive_squamous	oral	#N/A
ACH-000416	NCI-H838	NCIH838	NCIH838_LUNG	#N/A	910399	Male	ATCC	2	-5.41871	CVCL_1594	484	lymph_node	Metastasis	Lung Cancer	Non-Small Cell Lung Cancer (NSCLC), Adenocarcinoma	59	SIDM01150	lung	NSCLC	NSCLC_adenocarcinoma	#N/A
ACH-000420	SNU-449	SNU449	SNU449_LIVER	#N/A	909738	Male	ATCC	2	-3.59253	CVCL_0454	129	liver	Primary	Liver Cancer	Hepatocellular Carcinoma	52	SIDM01194	liver	hepatocellular_carcinoma	#N/A	#N/A
ACH-000421	SW837	SW837	SW837_LARGE_INTESTINE	#N/A	909755	Male	ATCC	3	-4.68742	CVCL_1729	1141	large_intestine	Primary	Colon/Colorectal Cancer	Adenocarcinoma	53	SIDM00833	colorectal	colorectal_adenocarcinoma	#N/A	#N/A
ACH-000423	SK-MEL-3	SKMEL3	SKMEL3_SKIN	#N/A	909724	Female	ATCC	#N/A	#N/A	CVCL_0550	1572	lymph_node	Metastasis	Skin Cancer	Melanoma	42	SIDM01105	skin	melanoma	#N/A	#N/A
ACH-000424	TC-71	TC71	TC71_BONE	#N/A	1240221	Male	DSMZ	2	-2.40501	CVCL_2213	2194	bone	Primary	Bone Cancer	Ewings Sarcoma	22	SIDM00419	bone	Ewing_sarcoma	#N/A	#N/A
ACH-000425	UACC-62	UACC62	UACC62_SKIN	#N/A	905976	Unknown	NCI/DCTD	2	-4.47017	CVCL_1780	8	skin	#N/A	Skin Cancer	Melanoma	#N/A	SIDM00107	skin	melanoma	#N/A	#N/A
ACH-000427	NCI-N87	NCIN87	NCIN87_STOMACH	#N/A	908461	Male	ATCC	2	-1.90075	CVCL_1603	88	liver	Metastasis	Gastric Cancer	Adenocarcinoma, tubular	#N/A	SIDM01147	gastric	gastric_adenocarcinoma	tubular	#N/A
ACH-000429	A-704	A704	A704_KIDNEY	#N/A	910920	Male	ATCC	#N/A	#N/A	CVCL_1065	949	kidney	Primary	Kidney Cancer	Renal Cell Carcinoma	78	SIDM00849	kidney	renal_cell_carcinoma	#N/A	#N/A
ACH-000430	TYK-nu	TYKNU	TYKNU_OVARY	#N/A	909774	Female	HSRRB	#N/A	#N/A	CVCL_1776	476	ovary	Primary	Ovarian Cancer	Adenocarcinoma, high grade serous	#N/A	SIDM00321	ovary	ovary_adenocarcinoma	high_grade_serous	#N/A
ACH-000433	Caki-1	CAKI1	CAKI1_KIDNEY	#N/A	905963	Male	ATCC	2	-2.71998	CVCL_0234	289	skin	Metastasis	Kidney Cancer	Renal Carcinoma, clear cell	49	SIDM00941	kidney	renal_cell_carcinoma	clear_cell	#N/A
ACH-000438	#N/A	LU65	LU65_LUNG	#N/A	724863	Male	JCRB	2	-3.51867	CVCL_1392	47	lung	Primary	Lung Cancer	Non-Small Cell Lung Cancer (NSCLC), Large Cell Carcinoma	64	SIDM00547	lung	NSCLC	NSCLC_large_cell	#N/A
ACH-000441	SH-4	SH4	SH4_SKIN	#N/A	909713	Female	ATCC	2	-4.09916	CVCL_1692	1179	pleural_effusion	Metastasis	Skin Cancer	Melanoma	60	SIDM01079	skin	melanoma	#N/A	#N/A
ACH-000442	RERF-LC-Sq1	RERFLCSQ1	RERFLCSQ1_LUNG	#N/A	1298538	Female	HSRRB	#N/A	#N/A	CVCL_1656	449	lung	Primary	Lung Cancer	Non-Small Cell Lung Cancer (NSCLC), Squamous Cell Carcinoma	74	SIDM00354	lung	NSCLC	NSCLC_squamous	#N/A
ACH-000447	NCI-H2228	NCIH2228	NCIH2228_LUNG	#N/A	687816	Female	ATCC	#N/A	#N/A	CVCL_1543	1812	lung	Primary	Lung Cancer	Non-Small Cell Lung Cancer (NSCLC), Adenocarcinoma	#N/A	SIDM00729	lung	NSCLC	NSCLC_adenocarcinoma	#N/A
ACH-000448	NCI-H1666	NCIH1666	NCIH1666_LUNG	#N/A	908473	Female	ATCC	2	-4.01919	CVCL_1485	958	pleural_effusion	Metastasis	Lung Cancer	Non-Small Cell Lung Cancer (NSCLC), Adenocarcinoma	50	SIDM00743	lung	NSCLC	NSCLC_adenocarcinoma	#N/A
ACH-000454	HCC-95	HCC95	HCC95_LUNG	#N/A	#N/A	Male	KCLB	2	-2.98535	CVCL_5137	#N/A	pleural_effusion	Metastasis	Lung Cancer	Non-Small Cell Lung Cancer (NSCLC), Squamous Cell Carcinoma	65	#N/A	lung	NSCLC	NSCLC_squamous	#N/A
ACH-000463	NCI-H460	NCIH460	NCIH460_LUNG	#N/A	905943	Male	ATCC	2	-3.17959	CVCL_0459	2146	pleural_effusion	Metastasis	Lung Cancer	Non-Small Cell Lung Cancer (NSCLC), Large Cell Carcinoma	#N/A	SIDM00144	lung	NSCLC	NSCLC_large_cell	#N/A
ACH-000467	HCC-56	HCC56	HCC56_LARGE_INTESTINE	#N/A	1290907	Unknown	HSRRB	3	-3.81932	CVCL_2917	1036	large_intestine	#N/A	Colon/Colorectal Cancer	Adenocarcinoma	#N/A	SIDM00597	colorectal	colorectal_adenocarcinoma	#N/A	#N/A
ACH-000473	RT-112	RT112	RT112_URINARY_TRACT	#N/A	909704	Female	DSMZ	2	-3.02518	CVCL_1670	25	urinary_tract	Primary	Bladder Cancer	Transitional Cell Carcinoma	#N/A	SIDM00402	urinary_tract	bladder_carcinoma	bladder_transitional_cell	#N/A
ACH-000475	huH-1	HUH1	HUH1_LIVER	#N/A	1298146	Male	HSRRB	2	-5.58089	CVCL_2956	1855	liver	Primary	Liver Cancer	Hepatocellular Carcinoma, HBs-antigen carrier	53	SIDM00586	liver	hepatocellular_carcinoma	hbs_antigen_carrier	#N/A
ACH-000476	JHH-4	JHH4	JHH4_LIVER	#N/A	1240158	Male	HSRRB	2	-3.60919	CVCL_2787	931	liver	Primary	Liver Cancer	Hepatocellular Carcinoma	51	SIDM00616	liver	hepatocellular_carcinoma	#N/A	#N/A
ACH-000479	KNS-81	KNS81	KNS81_CENTRAL_NERVOUS_SYSTEM	#N/A	#N/A	Male	HSRRB	0	-1.85423	CVCL_2799	#N/A	central_nervous_system	Primary	Brain Cancer	Glioblastoma	65	SIDM00605	central_nervous_system	glioma	glioblastoma	#N/A
ACH-000480	HuH-7	HUH7	HUH7_LIVER	#N/A	907071	Male	HSRRB	2	-3.86846	CVCL_0336	2195	liver	Primary	Liver Cancer	Hepatocellular Carcinoma	57	SIDM00585	liver	hepatocellular_carcinoma	#N/A	#N/A
ACH-000481	NCI-H2170	NCIH2170	NCIH2170_LUNG	#N/A	687815	Male	ATCC	3	-3.46615	CVCL_1535	1811	lung	Primary	Lung Cancer	Non-Small Cell Lung Cancer (NSCLC), Squamous Cell Carcinoma	#N/A	SIDM00716	lung	NSCLC	NSCLC_squamous	#N/A
ACH-000484	VMRC-RCW	VMRCRCW	VMRCRCW_KIDNEY	#N/A	1240224	Male	RIKEN	1	-3.28875	CVCL_1790	1459	kidney	Primary	Kidney Cancer	Renal Cell Carcinoma	#N/A	SIDM00318	kidney	renal_cell_carcinoma	#N/A	#N/A
ACH-000486	KU-19-19	KU1919	KU1919_URINARY_TRACT	#N/A	907312	Male	DSMZ	2	-4.25624	CVCL_1344	892	urinary_tract	#N/A	Bladder Cancer	Transitional Cell Carcinoma	76	SIDM01033	urinary_tract	bladder_carcinoma	bladder_transitional_cell	#N/A
ACH-000487	F-36P	F36P	F36P_HAEMATOPOIETIC_AND_LYMPHOID_TISSUE	#N/A	#N/A	Male	DSMZ	2	-4.31822	CVCL_2037	#N/A	pleural_effusion	Metastasis	Leukemia	Acute Myelogenous Leukemia (AML), M6 (Erythroleukemia)	68	#N/A	blood	AML	M6	#N/A
ACH-000488	TE-11	TE11	TE11_OESOPHAGUS	#N/A	946354	Male	RIKEN	2	-4.85944	CVCL_1761	2073	oesophagus	Primary	Esophageal Cancer	Squamous Cell Carcinoma	58	SIDM00348	esophagus	esophagus_squamous	#N/A	#N/A
ACH-000491	NCI-H716	NCIH716	NCIH716_LARGE_INTESTINE	#N/A	908458	Male	ATCC	3	-2.70809	CVCL_1581	649	ascites	Metastasis	Colon/Colorectal Cancer	Adenocarcinoma	33	SIDM00779	colorectal	colorectal_adenocarcinoma	#N/A	#N/A
ACH-000493	SNU-423	SNU423	SNU423_LIVER	#N/A	909737	Male	ATCC	1	-3.24086	CVCL_0366	481	liver	Primary	Liver Cancer	Hepatocellular Carcinoma	40	SIDM01199	liver	hepatocellular_carcinoma	#N/A	#N/A
ACH-000495	TUHR4TKB	TUHR4TKB	TUHR4TKB_KIDNEY	#N/A	#N/A	Male	RIKEN	1	-3.3984	CVCL_5957	#N/A	kidney	Primary	Kidney Cancer	Renal Cell Carcinoma	60	#N/A	kidney	renal_cell_carcinoma	#N/A	#N/A
ACH-000496	NCI-H1792	NCIH1792	NCIH1792_LUNG	#N/A	724868	Male	ATCC	4	-4.26745	CVCL_1495	2122	pleural_effusion	Metastasis	Lung Cancer	Non-Small Cell Lung Cancer (NSCLC), Adenocarcinoma	50	SIDM00771	lung	NSCLC	NSCLC_adenocarcinoma	#N/A
ACH-000502	TCC-PAN2	TCCPAN2	TCCPAN2_PANCREAS	#N/A	#N/A	Female	HSRRB	3	-4.73301	CVCL_3178	#N/A	ascites	Metastasis	Pancreatic Cancer	Ductal Adenocarcinoma, exocrine	68	#N/A	pancreas	exocrine	exocrine_adenocarcinoma	#N/A
ACH-000506	NCI-H146	NCIH146	NCIH146_LUNG	#N/A	910899	Male	ATCC	#N/A	#N/A	CVCL_1473	932	bone_marrow	Metastasis	Lung Cancer	Small Cell Lung Cancer (SCLC)	59	SIDM00698	lung	SCLC	#N/A	#N/A
ACH-000508	COR-L88	CORL88	CORL88_LUNG	#N/A	906808	Male	ECACC	#N/A	#N/A	CVCL_1141	774	pleural_effusion	Metastasis	Lung Cancer	Small Cell Lung Cancer (SCLC)	55	SIDM00506	lung	SCLC	#N/A	#N/A
ACH-000510	NCI-H1299	NCIH1299	NCIH1299_LUNG	#N/A	724831	Male	ATCC	2	-5.20731	CVCL_0060	1235	lymph_node	Metastasis	Lung Cancer	Non-Small Cell Lung Cancer (NSCLC), Large Cell Carcinoma	43	SIDM00649	lung	NSCLC	NSCLC_large_cell	#N/A
ACH-000511	Calu-1	CALU1	CALU1_LUNG	#N/A	#N/A	Male	ATCC	2	-4.92311	CVCL_0608	#N/A	pleura	Metastasis	Lung Cancer	Non-Small Cell Lung Cancer (NSCLC), Squamous Cell Carcinoma	47	#N/A	lung	NSCLC	NSCLC_squamous	#N/A
ACH-000518	CAL-33	CAL33	CAL33_UPPER_AERODIGESTIVE_TRACT	#N/A	753541	Male	DSMZ	2	-3.46546	CVCL_1108	2041	upper_aerodigestive_tract	Primary	Head and Neck Cancer	Squamous Cell Carcinoma, oral	69	SIDM00942	upper_aerodigestive	upper_aerodigestive_squamous	oral	#N/A
ACH-000521	NCI-H2030	NCIH2030	NCIH2030_LUNG	#N/A	722045	Male	ATCC	3	-3.02662	CVCL_1517	912	lymph_node	Metastasis	Lung Cancer	Non-Small Cell Lung Cancer (NSCLC), Adenocarcinoma	#N/A	SIDM00715	lung	NSCLC	NSCLC_adenocarcinoma	#N/A
ACH-000522	UM-UC-3	UMUC3	UMUC3_URINARY_TRACT	#N/A	724838	Male	ATCC	2	-5.12986	CVCL_1783	9	urinary_tract	Primary	Bladder Cancer	Transitional Cell Carcinoma	#N/A	SIDM01182	urinary_tract	bladder_carcinoma	bladder_transitional_cell	#N/A
ACH-000524	KURAMOCHI	KURAMOCHI	KURAMOCHI_OVARY	#N/A	909975	Female	HSRRB	3	-5.85515	CVCL_1345	854	ascites	Metastasis	Ovarian Cancer	Adenocarcinoma, high grade serous	#N/A	SIDM00554	ovary	ovary_adenocarcinoma	high_grade_serous	#N/A
ACH-000528	ABC-1	ABC1	ABC1_LUNG	#N/A	906791	Male	HSRRB	3	-5.63657	CVCL_1066	1557	pleural_effusion	Metastasis	Lung Cancer	Non-Small Cell Lung Cancer (NSCLC), Adenocarcinoma	47	SIDM00494	lung	NSCLC	NSCLC_adenocarcinoma	#N/A
ACH-000530	DMS 114	DMS114	DMS114_LUNG	#N/A	687983	Male	ATCC	#N/A	#N/A	CVCL_1174	1495	lung	Primary	Lung Cancer	Small Cell Lung Cancer (SCLC)	68	SIDM00865	lung	SCLC	#N/A	#N/A
ACH-000532	SNU-61	SNU61	SNU61_LARGE_INTESTINE	#N/A	1660035	Male	KCLB	#N/A	#N/A	CVCL_5078	151	liver	Metastasis	Colon/Colorectal Cancer	Adenocarcinoma	48	SIDM00194	colorectal	colorectal_adenocarcinoma	#N/A	#N/A
ACH-000535	BxPC-3	BXPC3	BXPC3_PANCREAS	#N/A	906693	Female	ATCC	2	-4.19944	CVCL_0186	1978	pancreas	Primary	Pancreatic Cancer	Ductal Adenocarcinoma, exocrine	61	SIDM00132	pancreas	exocrine	exocrine_adenocarcinoma	#N/A
ACH-000536	BT-20	BT20	BT20_BREAST	#N/A	906801	Female	ATCC	#N/A	#N/A	CVCL_0178	2264	breast	Primary	Breast Cancer	Breast Ductal Carcinoma	74	SIDM00893	breast	breast_ductal_carcinoma	ERneg_HER2neg	basal_A
ACH-000542	Hey-A8	HEYA8	HEYA8_OVARY	#N/A	#N/A	Female	Academic lab	3	-3.5153	CVCL_8878	#N/A	ascites	Metastasis	Ovarian Cancer	Adenocarcinoma, low grade serous	#N/A	SIDM01215	ovary	ovary_adenocarcinoma	low_grade_serous	#N/A
ACH-000546	HSC-4	HSC4	HSC4_UPPER_AERODIGESTIVE_TRACT	#N/A	907062	Male	HSRRB	#N/A	#N/A	CVCL_1289	99	upper_aerodigestive_tract	Metastasis	Head and Neck Cancer	Squamous Cell Carcinoma	64	SIDM00588	upper_aerodigestive	upper_aerodigestive_squamous	#N/A	#N/A
ACH-000547	HT-1197	HT1197	HT1197_URINARY_TRACT	#N/A	907065	Male	ATCC	2	-2.86827	CVCL_1291	1533	urinary_tract	Primary	Bladder Cancer	Carcinoma	44	SIDM00676	urinary_tract	bladder_carcinoma	#N/A	#N/A
ACH-000550	IGR-39	IGR39	IGR39_SKIN	#N/A	#N/A	Male	DSMZ	2	-4.45387	CVCL_2076	#N/A	skin	Primary	Skin Cancer	Melanoma	26	SIDM01065	skin	melanoma	#N/A	#N/A
ACH-000551	K-562	K562	K562_HAEMATOPOIETIC_AND_LYMPHOID_TISSUE	#N/A	905940	Female	ATCC	2	-3.20871	CVCL_0004	2098	pleural_effusion	Metastasis	Leukemia	Chronic Myelogenous Leukemia (CML), blast crisis	53	SIDM00791	blood	CML	blast_crisis	#N/A
ACH-000552	HT-29	HT29	HT29_LARGE_INTESTINE	#N/A	905939	Female	ATCC	2	-4.44776	CVCL_0320	1212	large_intestine	Primary	Colon/Colorectal Cancer	Adenocarcinoma	44	SIDM00136	colorectal	colorectal_adenocarcinoma	#N/A	#N/A
ACH-000553	Sq-1	SQ1	SQ1_LUNG	#N/A	#N/A	Male	RIKEN	#N/A	#N/A	CVCL_4900	#N/A	lung	Primary	Lung Cancer	Non-Small Cell Lung Cancer (NSCLC), Squamous Cell Carcinoma	#N/A	#N/A	lung	NSCLC	NSCLC_squamous	#N/A
ACH-000555	A-498	A498	A498_KIDNEY	#N/A	905948	Male	ATCC	#N/A	#N/A	CVCL_1056	602	kidney	Primary	Kidney Cancer	Renal Cell Carcinoma	52	SIDM00124	kidney	renal_cell_carcinoma	#N/A	#N/A
ACH-000558	A-172	A172	A172_CENTRAL_NERVOUS_SYSTEM	#N/A	687563	Male	ATCC	#N/A	#N/A	CVCL_0131	1777	central_nervous_system	Primary	Brain Cancer	Glioblastoma	53	SIDM00799	central_nervous_system	glioma	glioblastoma	#N/A
ACH-000563	EBC-1	EBC1	EBC1_LUNG	#N/A	753554	Male	RIKEN	2	-2.4905	CVCL_2891	1665	skin	Metastasis	Lung Cancer	Non-Small Cell Lung Cancer (NSCLC), Squamous Cell Carcinoma	69	SIDM00486	lung	NSCLC	NSCLC_squamous	#N/A
ACH-000573	MDA-MB-436	MDAMB436	MDAMB436_BREAST	#N/A	1240172	Female	ATCC	3	-5.24267	CVCL_0623	927	pleural_effusion	Metastasis	Breast Cancer	Carcinoma	43	SIDM00629	breast	breast_carcinoma	ERneg_HER2neg	basal_B
ACH-000574	FU-OV-1	FUOV1	FUOV1_OVARY	#N/A	1240129	Female	DSMZ	#N/A	#N/A	CVCL_2047	2063	ovary	Primary	Ovarian Cancer	Adenocarcinoma, high grade serous	65	SIDM01040	ovary	ovary_adenocarcinoma	high_grade_serous	#N/A
ACH-000576	KMS-27	KMS27	KMS27_HAEMATOPOIETIC_AND_LYMPHOID_TISSUE	#N/A	#N/A	Male	HSRRB	2	-2.71429	CVCL_2993	#N/A	haematopoietic_and_lymphoid_tissue	Primary	Myeloma	Multiple Myeloma	52	#N/A	plasma_cell	multiple_myeloma	#N/A	#N/A
ACH-000579	UACC-257	UACC257	UACC257_SKIN	#N/A	905977	Unknown	NCI/DCTD	1	-1.37348	CVCL_1779	14	skin	Primary	Skin Cancer	Melanoma	#N/A	SIDM00108	skin	melanoma	#N/A	#N/A
ACH-000580	C32	C32	C32_SKIN	#N/A	906830	Male	ATCC	2	-3.44219	CVCL_1097	2242	skin	Primary	Skin Cancer	Melanoma, amelanotic	53	SIDM00890	skin	melanoma	amelanotic	#N/A
ACH-000582	COLO 741	COLO741	COLO741_SKIN	#N/A	#N/A	Female	ECACC	#N/A	#N/A	CVCL_1133	#N/A	skin	Metastasis	Skin Cancer	Melanoma	69	#N/A	skin	melanoma	#N/A	#N/A
ACH-000587	NCI-H1975	NCIH1975	NCIH1975_LUNG	#N/A	924244	Female	ATCC	2	-4.65411	CVCL_1511	1403	lung	Primary	Lung Cancer	Non-Small Cell Lung Cancer (NSCLC), Adenocarcinoma	#N/A	SIDM00759	lung	NSCLC	NSCLC_adenocarcinoma	#N/A
ACH-000589	NCI-H1437	NCIH1437	NCIH1437_LUNG	#N/A	687794	Male	ATCC	3	-4.63413	CVCL_1472	800	pleural_effusion	Metastasis	Lung Cancer	Non-Small Cell Lung Cancer (NSCLC), Adenocarcinoma	60	SIDM00734	lung	NSCLC	NSCLC_adenocarcinoma	#N/A
ACH-000595	LN-229	LN229	LN229_CENTRAL_NERVOUS_SYSTEM	#N/A	1240169	Female	ATCC	2	-5.63122	CVCL_0393	1504	central_nervous_system	Primary	Brain Cancer	Glioblastoma	60	SIDM00684	central_nervous_system	glioma	glioblastoma	#N/A
ACH-000601	MIA PaCa-2	MIAPACA2	MIAPACA2_PANCREAS	#N/A	724870	Male	ATCC	4	-5.42234	CVCL_0428	1541	pancreas	Primary	Pancreatic Cancer	Ductal Adenocarcinoma, exocrine	65	SIDM00505	pancreas	exocrine	exocrine_adenocarcinoma	#N/A
ACH-000605	TE-6	TE6	TE6_OESOPHAGUS	#N/A	946355	Male	RIKEN	2	-3.1378	CVCL_1765	1642	oesophagus	#N/A	Esophageal Cancer	Squamous Cell Carcinoma	#N/A	SIDM00328	esophagus	esophagus_squamous	#N/A	#N/A
ACH-000606	PE/CA-PJ34 (clone C12)	PECAPJ34CLONEC12	PECAPJ34CLONEC12_UPPER_AERODIGESTIVE_TRACT	#N/A	#N/A	Male	ECACC	2	-3.70638	CVCL_2679	#N/A	upper_aerodigestive_tract	Primary	Head and Neck Cancer	Squamous Cell Carcinoma, basaloid	60	#N/A	upper_aerodigestive	upper_aerodigestive_squamous	basaloid	#N/A
ACH-000607	KYM-1	KYM1	KYM1_SOFT_TISSUE	#N/A	1240166	Male	HSRRB	2	-3.13156	CVCL_3007	1344	soft_tissue	Primary	Rhabdoid	Malignant Rhabdoid Tumor	1	SIDM00552	soft_tissue	malignant_rhabdoid_tumor	#N/A	#N/A
ACH-000611	SU-DHL-6	SUDHL6	SUDHL6_HAEMATOPOIETIC_AND_LYMPHOID_TISSUE	#N/A	1331037	Male	DSMZ	#N/A	#N/A	CVCL_2206	2036	ascites	Metastasis	Lymphoma	Diffuse Large B-cell Lymphoma (DLBCL)	43	SIDM00407	lymphocyte	non_hodgkin_lymphoma	DLBCL	#N/A
ACH-000614	RVH-421	RVH421	RVH421_SKIN	#N/A	909706	Male	DSMZ	2	-3.14939	CVCL_1672	1274	central_nervous_system	Metastasis	Skin Cancer	Melanoma	28	SIDM00401	skin	melanoma	#N/A	#N/A
ACH-000615	SK-MEL-28	SKMEL28	SKMEL28_SKIN	#N/A	905954	Male	ATCC	#N/A	#N/A	CVCL_0526	1499	skin	#N/A	Skin Cancer	Melanoma	51	SIDM00081	skin	melanoma	#N/A	#N/A
ACH-000617	OVCAR-4	OVCAR4	OVCAR4_OVARY	#N/A	905990	Female	NCI/DCTD	#N/A	#N/A	CVCL_1627	606	ascites	Metastasis	Ovarian Cancer	Adenocarcinoma, high grade serous	42	SIDM00092	ovary	ovary_adenocarcinoma	high_grade_serous	#N/A
ACH-000620	JHH-1	JHH1	JHH1_LIVER	#N/A	1298151	Male	HSRRB	2	-4.67852	CVCL_2785	89	liver	Primary	Liver Cancer	Hepatocellular Carcinoma	50	SIDM00618	liver	hepatocellular_carcinoma	#N/A	#N/A
ACH-000621	MDA-MB-157	MDAMB157	MDAMB157_BREAST	#N/A	925338	Female	ATCC	3	-4.33525	CVCL_0618	1796	pleural_effusion	Metastasis	Breast Cancer	Breast Ductal Carcinoma	44	SIDM00529	breast	breast_ductal_carcinoma	ERneg_HER2neg	basal_B
ACH-000622	KNS-42	KNS42	KNS42_CENTRAL_NERVOUS_SYSTEM	#N/A	907282	Male	HSRRB	2	-3.12387	CVCL_0378	1149	central_nervous_system	Primary	Brain Cancer	Glioblastoma	16	SIDM00607	central_nervous_system	glioma	glioblastoma	#N/A
ACH-000624	HCC1806	HCC1806	HCC1806_BREAST	#N/A	907047	Female	ATCC	3	-5.85625	CVCL_1258	1317	breast	Primary	Breast Cancer	Breast Ductal Carcinoma	60	SIDM00875	breast	breast_ductal_carcinoma	ERneg_HER2neg	basal_A
ACH-000625	Hep 3B2.1-7	HEP3B217	HEP3B217_LIVER	#N/A	1240147	Male	ATCC	#N/A	#N/A	CVCL_0326	1922	liver	Primary	Liver Cancer	Hepatocellular Carcinoma	8	SIDM00672	liver	hepatocellular_carcinoma	#N/A	#N/A
ACH-000627	LCLC-103H	LCLC103H	LCLC103H_LUNG	#N/A	753586	Male	DSMZ	2	-4.44062	CVCL_1375	1502	pleural_effusion	Metastasis	Lung Cancer	Non-Small Cell Lung Cancer (NSCLC), Large Cell Carcinoma	61	SIDM00345	lung	NSCLC	NSCLC_large_cell	#N/A
ACH-000632	Hs 944.T	HS944T	HS944T_SKIN	#N/A	#N/A	Male	ATCC	2	-4.88225	CVCL_1040	#N/A	skin	Metastasis	Skin Cancer	Melanoma	51	SIDM00063	skin	melanoma	#N/A	#N/A
ACH-000635	SNU-119	SNU119	SNU119_OVARY	#N/A	#N/A	Female	KCLB	#N/A	#N/A	CVCL_5014	#N/A	ascites	Metastasis	Ovarian Cancer	Cystadenocarcinoma, high grade serous	50	#N/A	ovary	ovary_adenocarcinoma	high_grade_serous	#N/A
ACH-000638	NCI-H441	NCIH441	NCIH441_LUNG	#N/A	908460	Male	ATCC	4	-3.2011	CVCL_1561	1815	pericardial_effusion	Metastasis	Lung Cancer	Non-Small Cell Lung Cancer (NSCLC), Adenocarcinoma	#N/A	SIDM00925	lung	NSCLC	NSCLC_adenocarcinoma	#N/A
ACH-000641	CMK	CMK	CMK_HAEMATOPOIETIC_AND_LYMPHOID_TISSUE	#N/A	910566	Male	DSMZ	#N/A	#N/A	CVCL_0216	734	haematopoietic_and_lymphoid_tissue	#N/A	Leukemia	Acute Myelogenous Leukemia (AML), M7 (Megakaryoblastic)	0.8	SIDM00959	blood	AML	M7	#N/A
ACH-000643	HDQ-P1	HDQP1	HDQP1_BREAST	#N/A	1290922	Female	DSMZ	#N/A	#N/A	CVCL_2067	743	breast	Primary	Breast Cancer	Breast Ductal Carcinoma	50	SIDM01062	breast	breast_ductal_carcinoma	ERneg_HER2neg	basal_A
ACH-000644	COLO 829	COLO829	COLO829_SKIN	#N/A	687448	Male	ATCC	#N/A	#N/A	CVCL_1137	430	skin	Primary	Skin Cancer	Melanoma	45	SIDM00909	skin	melanoma	#N/A	#N/A
ACH-000647	TE-1	TE1	TE1_OESOPHAGUS	#N/A	753621	Male	JCRB	2	-4.83649	CVCL_1759	1493	oesophagus	Primary	Esophageal Cancer	Squamous Cell Carcinoma	#N/A	SIDM00369	esophagus	esophagus_squamous	#N/A	#N/A
ACH-000649	786-O	786O	786O_KIDNEY	#N/A	905947	Male	ATCC	3	-4.26909	CVCL_1051	301	kidney	Primary	Kidney Cancer	Renal Carcinoma, clear cell	58	SIDM00125	kidney	renal_cell_carcinoma	clear_cell	#N/A
ACH-000650	IGR-37	IGR37	IGR37_SKIN	#N/A	1240153	Male	DSMZ	#N/A	#N/A	CVCL_2075	1535	lymph_node	Metastasis	Skin Cancer	Melanoma	26	SIDM01066	skin	melanoma	#N/A	#N/A
ACH-000651	SW 620	SW620	SW620_LARGE_INTESTINE	#N/A	905962	Male	ATCC	3	-3.6073	CVCL_0547	3	lymph_node	Metastasis	Colon/Colorectal Cancer	Adenocarcinoma	51	SIDM00841	colorectal	colorectal_adenocarcinoma	#N/A	#N/A
ACH-000652	SUIT-2	SUIT2	SUIT2_PANCREAS	#N/A	1240219	Male	HSRRB	2	-3.31301	CVCL_3172	1749	liver	Metastasis	Pancreatic Cancer	Ductal Adenocarcinoma, exocrine	73	SIDM00371	pancreas	exocrine	exocrine_adenocarcinoma	#N/A
ACH-000657	A2780	A2780	A2780_OVARY	#N/A	906804	Female	ECACC	2	-3.75409	CVCL_0134	1245	ovary	Primary	Ovarian Cancer	Adenocarcinoma, endometrioid	#N/A	SIDM00210	ovary	ovary_adenocarcinoma	endometrioid	#N/A
ACH-000661	WM1799	WM1799	WM1799_SKIN	#N/A	#N/A	Male	WISTAR	2	-4.56556	CVCL_A341	#N/A	skin	#N/A	Skin Cancer	Melanoma	#N/A	#N/A	skin	melanoma	#N/A	#N/A
ACH-000662	COR-L23	CORL23	CORL23_LUNG	COR-L23/CPR	687780	Male	ECACC	1	-2.21644	CVCL_1139	1313	pleural_effusion	Metastasis	Lung Cancer	Non-Small Cell Lung Cancer (NSCLC), Large Cell Carcinoma	62	SIDM00512	lung	NSCLC	NSCLC_large_cell	#N/A
ACH-000666	NCI-H1355	NCIH1355	NCIH1355_LUNG	#N/A	724866	Male	ATCC	#N/A	#N/A	CVCL_1464	1780	pleural_effusion	Metastasis	Lung Cancer	Non-Small Cell Lung Cancer (NSCLC), Adenocarcinoma	53	SIDM00645	lung	NSCLC	NSCLC_adenocarcinoma	#N/A
ACH-000667	HCC-44	HCC44	HCC44_LUNG	#N/A	1240145	Female	DSMZ	2	-4.70865	CVCL_2060	1247	lung	Primary	Lung Cancer	Non-Small Cell Lung Cancer (NSCLC), Adenocarcinoma	54	SIDM01069	lung	NSCLC	NSCLC_adenocarcinoma	#N/A
ACH-000668	HCC70	HCC70	HCC70_BREAST	#N/A	907048	Female	ATCC	#N/A	#N/A	CVCL_1270	937	breast	Primary	Breast Cancer	Breast Ductal Carcinoma	49	SIDM00673	breast	breast_ductal_carcinoma	ERneg_HER2neg	basal_A
ACH-000670	SBC-5	SBC5	SBC5_LUNG	#N/A	713880	Male	HSRRB	#N/A	#N/A	CVCL_1679	999	pleural_effusion	Metastasis	Lung Cancer	Small Cell Lung Cancer (SCLC)	#N/A	SIDM00368	lung	SCLC	#N/A	#N/A
ACH-000671	HuH-6	HUH6	HUH6_LIVER	#N/A	#N/A	Male	RIKEN	2	-4.7538	CVCL_4381	#N/A	liver	#N/A	Liver Cancer	Hepatoblastoma	#N/A	SIDM00062	liver	hepatoblastoma	#N/A	#N/A
ACH-000672	IA-LM	IALM	IALM_LUNG	#N/A	910779	Male	RIKEN	0	-0.974955	CVCL_1302	1792	skin	Metastasis	Lung Cancer	Non-Small Cell Lung Cancer (NSCLC), Large Cell Carcinoma	68	SIDM00306	lung	NSCLC	NSCLC_large_cell	#N/A
ACH-000677	SW 1573	SW1573	SW1573_LUNG	#N/A	724878	Female	ATCC	2	-3.51785	CVCL_1720	849	lung	Primary	Lung Cancer	Non-Small Cell Lung Cancer (NSCLC), Adenocarcinoma	44	SIDM01163	lung	NSCLC	NSCLC_adenocarcinoma	#N/A
ACH-000678	MKN7	MKN7	MKN7_STOMACH	#N/A	924250	Male	RIKEN	#N/A	#N/A	CVCL_1417	2113	lymph_node	Metastasis	Gastric Cancer	Adenocarcinoma, tubular	39	SIDM00560	gastric	gastric_adenocarcinoma	tubular	#N/A
ACH-000680	SW948	SW948	SW948_LARGE_INTESTINE	#N/A	909757	Female	ATCC	1	-1.37353	CVCL_0632	1689	Colon	Primary	Colon/Colorectal Cancer	Adenocarcinoma	81	SIDM00832	colorectal	colorectal_adenocarcinoma	#N/A	#N/A
ACH-000681	A549	A549	A549_LUNG	#N/A	905949	Male	ATCC	4	-2.67323	CVCL_0023	369	lung	Primary	Lung Cancer	Non-Small Cell Lung Cancer (NSCLC), Adenocarcinoma	52	SIDM00903	lung	NSCLC	NSCLC_adenocarcinoma	#N/A
ACH-000684	KMRC-1	KMRC1	KMRC1_KIDNEY	#N/A	1298168	Male	HSRRB	3	-1.97564	CVCL_2983	1514	kidney	Primary	Kidney Cancer	Renal Carcinoma, clear cell	#N/A	SIDM00611	kidney	renal_cell_carcinoma	clear_cell	#N/A
ACH-000685	L3.3	L33	L33_PANCREAS	#N/A	#N/A	Female	Academic lab	2	-3.9596	CVCL_8147	#N/A	lymph_node	Metastasis	Pancreatic Cancer	Ductal Adenosquamous Carcinoma	#N/A	#N/A	pancreas	exocrine	exocrine_adenosquamous	#N/A
ACH-000693	KYSE-180	KYSE180	KYSE180_OESOPHAGUS	#N/A	907318	Male	DSMZ	2	-5.41442	CVCL_1349	599	oesophagus	Primary	Esophageal Cancer	Squamous Cell Carcinoma	53	SIDM01030	esophagus	esophagus_squamous	#N/A	#N/A
ACH-000695	COR-L47	CORL47	CORL47_LUNG	#N/A	#N/A	Male	ECACC	1	-2.18767	CVCL_2415	#N/A	bone_marrow	Metastasis	Lung Cancer	Small Cell Lung Cancer (SCLC)	67	#N/A	lung	SCLC	#N/A	#N/A
ACH-000696	OVCAR-8	OVCAR8	OVCAR8_OVARY	#N/A	905991	Female	NCI/DCTD	3	-5.06276	CVCL_1629	2131	ovary	Primary	Ovarian Cancer	Adenocarcinoma, high grade serous	64	SIDM00090	ovary	ovary_adenocarcinoma	high_grade_serous	#N/A
ACH-000699	HCC1395	HCC1395	HCC1395_BREAST	#N/A	749712	Female	ATCC	3	-5.13397	CVCL_1249	94	breast	Primary	Breast Cancer	Breast Ductal Carcinoma	43	SIDM00884	breast	breast_ductal_carcinoma	ERneg_HER2neg	basal_B
ACH-000701	RMUG-S	RMUGS	RMUGS_OVARY	#N/A	#N/A	Female	HSRRB	2	-2.74832	CVCL_3158	#N/A	ovary	Primary	Ovarian Cancer	Cystadenocarcinoma, mucinous	62	#N/A	ovary	ovary_adenocarcinoma	mucinous	#N/A
ACH-000711	JIMT-1	JIMT1	JIMT1_BREAST	#N/A	1298157	Female	DSMZ	3	-6.46142	CVCL_2077	479	pleural_effusion	Metastasis	Breast Cancer	Breast Ductal Carcinoma	62	SIDM01037	breast	breast_ductal_carcinoma	ERneg_HER2pos	basal_A
ACH-000713	Caov-3	CAOV3	CAOV3_OVARY	#N/A	906825	Female	ATCC	3	-2.50363	CVCL_0201	320	ovary	Primary	Ovarian Cancer	Adenocarcinoma, high grade serous	54	SIDM00919	ovary	ovary_adenocarcinoma	high_grade_serous	#N/A
ACH-000714	KMS-11	KMS11	KMS11_HAEMATOPOIETIC_AND_LYMPHOID_TISSUE	#N/A	1659817	Female	HSRRB	1	-2.75912	CVCL_2989	1308	pleural_effusion	Primary	Myeloma	Multiple Myeloma	67	SIDM00608	plasma_cell	multiple_myeloma	#N/A	#N/A
ACH-000718	NCI-H2291	NCIH2291	NCIH2291_LUNG	#N/A	724874	Male	ATCC	3	-3.75397	CVCL_1546	917	lymph_node	Metastasis	Lung Cancer	Non-Small Cell Lung Cancer (NSCLC), Adenocarcinoma	#N/A	SIDM00728	lung	NSCLC	NSCLC_adenocarcinoma	#N/A
ACH-000720	TCCSUP	TCCSUP	TCCSUP_URINARY_TRACT	#N/A	687459	Female	ATCC	2	-4.76611	CVCL_1738	275	urinary_tract	Primary	Bladder Cancer	Transitional Cell Carcinoma	67	SIDM01190	urinary_tract	bladder_carcinoma	bladder_transitional_cell	#N/A
ACH-000722	SNU-C1	SNUC1	SNUC1_LARGE_INTESTINE	#N/A	910905	Male	ATCC	#N/A	#N/A	CVCL_1708	1066	abdomen	Metastasis	Colon/Colorectal Cancer	Adenocarcinoma	71	SIDM01197	colorectal	colorectal_adenocarcinoma	#N/A	#N/A
ACH-000724	HT-1376	HT1376	HT1376_URINARY_TRACT	#N/A	907066	Female	ATCC	2	-2.69946	CVCL_1292	1211	urinary_tract	Primary	Bladder Cancer	Carcinoma	58	SIDM00678	urinary_tract	bladder_carcinoma	#N/A	#N/A
ACH-000726	TE-14	TE14	TE14_OESOPHAGUS	#N/A	#N/A	Male	RIKEN	#N/A	#N/A	CVCL_3336	#N/A	oesophagus	#N/A	Esophageal Cancer	Squamous Cell Carcinoma	#N/A	#N/A	esophagus	esophagus_squamous	#N/A	#N/A
ACH-000727	NCI-H2066	NCIH2066	NCIH2066_LUNG	#N/A	1330973	Female	ATCC	#N/A	#N/A	CVCL_1520	1073	lung	Primary	Lung Cancer	Small Cell Lung Cancer (SCLC)	70	SIDM00711	lung	SCLC	#N/A	#N/A
ACH-000728	KASUMI-2	KASUMI2	KASUMI2_HAEMATOPOIETIC_AND_LYMPHOID_TISSUE	#N/A	#N/A	Male	DSMZ	#N/A	#N/A	CVCL_0590	#N/A	bone_marrow	#N/A	Leukemia	Acute Lymphoblastic Leukemia (ALL), B-cell	15	#N/A	blood	ALL	b_cell	#N/A
ACH-000730	SK-MEL-5	SKMEL5	SKMEL5_SKIN	#N/A	905956	Female	ATCC	0	-0.665329	CVCL_0527	1491	lymph_node	Metastasis	Skin Cancer	Melanoma	24	SIDM00080	skin	melanoma	#N/A	#N/A
ACH-000734	JHH-5	JHH5	JHH5_LIVER	#N/A	#N/A	Male	HSRRB	3	-4.74174	CVCL_0364	#N/A	liver	Primary	Liver Cancer	Hepatocellular Carcinoma	50	#N/A	liver	hepatocellular_carcinoma	#N/A	#N/A
ACH-000738	GB-1	GB1	GB1_CENTRAL_NERVOUS_SYSTEM	#N/A	687568	Male	HSRRB	2	-4.77689	CVCL_1227	2095	central_nervous_system	Primary	Brain Cancer	Glioblastoma	35	SIDM00581	central_nervous_system	glioma	glioblastoma	#N/A
ACH-000739	Hep G2	HEPG2	HEPG2_LIVER	#N/A	#N/A	Male	ATCC	2	-3.30483	CVCL_0027	#N/A	liver	Primary	Liver Cancer	Hepatocellular Carcinoma	15	SIDM00904	liver	hepatocellular_carcinoma	#N/A	#N/A
ACH-000747	NCI-H1703	NCIH1703	NCIH1703_LUNG	#N/A	908474	Male	ATCC	2	-4.33667	CVCL_1490	1239	lung	Primary	Lung Cancer	Non-Small Cell Lung Cancer (NSCLC), Squamous Cell Carcinoma	54	SIDM00740	lung	NSCLC	NSCLC_squamous	#N/A
ACH-000748	SJSA-1	SJSA1	SJSA1_BONE	#N/A	909717	Male	ATCC	1	-4.5023	CVCL_1697	1180	bone	Primary	Bone Cancer	Osteosarcoma	19	SIDM01112	bone	osteosarcoma	#N/A	#N/A
ACH-000749	DMS 273	DMS273	DMS273_LUNG	#N/A	687985	Female	ECACC	#N/A	#N/A	CVCL_1176	1862	pleural_effusion	Metastasis	Lung Cancer	Small Cell Lung Cancer (SCLC)	50	SIDM00522	lung	SCLC	#N/A	#N/A
ACH-000750	LOX IMVI	LOXIMVI	LOXIMVI_SKIN	#N/A	905974	Male	NCI/DCTD	0	-0.300038	CVCL_1381	401	lymph_node	Metastasis	Skin Cancer	Melanoma	58	SIDM00149	skin	melanoma	#N/A	#N/A
ACH-000752	NCI-H196	NCIH196	NCIH196_LUNG	#N/A	1240186	Male	ATCC	#N/A	#N/A	CVCL_1509	1250	pleural_effusion	Metastasis	Lung Cancer	Small Cell Lung Cancer (SCLC)	68	SIDM00761	lung	SCLC	#N/A	#N/A
ACH-000753	JMSU-1	JMSU1	JMSU1_URINARY_TRACT	#N/A	#N/A	Male	DSMZ	2	-5.83475	CVCL_2081	#N/A	ascites	Metastasis	Bladder Cancer	Carcinoma	75	#N/A	urinary_tract	bladder_carcinoma	#N/A	#N/A
ACH-000754	L-428	L428	L428_HAEMATOPOIETIC_AND_LYMPHOID_TISSUE	#N/A	907322	Female	DSMZ	2	-3.31444	CVCL_1361	1804	pleural_effusion	#N/A	Lymphoma	B-cell, Hodgkins	37	SIDM00327	lymphocyte	hodgkin_lymphoma	#N/A	#N/A
ACH-000755	HCC2218	HCC2218	HCC2218_BREAST	#N/A	749716	Female	ATCC	#N/A	#N/A	CVCL_1263	352	breast	Primary	Breast Cancer	Breast Ductal Carcinoma	38	SIDM00772	breast	breast_ductal_carcinoma	ERneg_HER2pos	HER2_amp
ACH-000768	MDA-MB-231	MDAMB231	MDAMB231_BREAST	#N/A	905960	Female	ATCC	2	-3.83952	CVCL_0062	1013	pleural_effusion	Metastasis	Breast Cancer	Carcinoma	51	SIDM00146	breast	breast_carcinoma	ERneg_HER2neg	basal_B
ACH-000769	LK-2	LK2	LK2_LUNG	#N/A	687787	Male	RIKEN	3	-3.89964	CVCL_1377	45	lung	Primary	Lung Cancer	Non-Small Cell Lung Cancer (NSCLC), Squamous Cell Carcinoma	#N/A	SIDM00548	lung	NSCLC	NSCLC_squamous	#N/A
ACH-000777	KYSE-30	KYSE30	KYSE30_OESOPHAGUS	#N/A	#N/A	Male	DSMZ	2	-3.8513	CVCL_1351	#N/A	oesophagus	Primary	Esophageal Cancer	Squamous Cell Carcinoma	64	SIDM00015	esophagus	esophagus_squamous	#N/A	#N/A
ACH-000778	HSC-3	HSC3	HSC3_UPPER_AERODIGESTIVE_TRACT	#N/A	907061	Male	HSRRB	2	-2.80092	CVCL_1288	648	upper_aerodigestive_tract	Metastasis	Head and Neck Cancer	Squamous Cell Carcinoma	64	SIDM00589	upper_aerodigestive	upper_aerodigestive_squamous	#N/A	#N/A
ACH-000782	SEM	SEM	SEM_HAEMATOPOIETIC_AND_LYMPHOID_TISSUE	#N/A	#N/A	Female	DSMZ	2	-2.65454	CVCL_0095	#N/A	haematopoietic_and_lymphoid_tissue	Primary	Leukemia	Acute Lymphoblastic Leukemia (ALL), B-cell	5	#N/A	blood	ALL	b_cell	#N/A
ACH-000783	CAMA-1	CAMA1	CAMA1_BREAST	#N/A	946382	Female	ATCC	3	-2.91326	CVCL_1115	363	pleural_effusion	Metastasis	Breast Cancer	Carcinoma	51	SIDM00920	breast	breast_carcinoma	ERpos_HER2neg	luminal
ACH-000784	KYSE-70	KYSE70	KYSE70_OESOPHAGUS	#N/A	753576	Male	DSMZ	2	-5.23066	CVCL_1356	2219	oesophagus	Primary	Esophageal Cancer	Squamous Cell Carcinoma	77	SIDM01024	esophagus	esophagus_squamous	#N/A	#N/A
ACH-000785	NCI-H2126	NCIH2126	NCIH2126_LUNG	#N/A	#N/A	Male	ATCC	3	-3.32693	CVCL_1532	#N/A	haematopoietic_and_lymphoid_tissue	Metastasis	Lung Cancer	Non-Small Cell Lung Cancer (NSCLC), Adenocarcinoma	65	SIDM00775	lung	NSCLC	NSCLC_adenocarcinoma	#N/A
ACH-000787	LXF-289	LXF289	LXF289_LUNG	#N/A	753592	Male	DSMZ	3	-5.02264	CVCL_1394	1175	lung	Primary	Lung Cancer	Non-Small Cell Lung Cancer (NSCLC), Adenocarcinoma	63	SIDM00339	lung	NSCLC	NSCLC_adenocarcinoma	#N/A
ACH-000788	A2058	A2058	A2058_SKIN	#N/A	906792	Male	ATCC	2	-5.19089	CVCL_1059	652	lymph_node	Metastasis	Skin Cancer	Melanoma	43	SIDM00797	skin	melanoma	#N/A	#N/A
ACH-000790	SHP-77	SHP77	SHP77_LUNG	#N/A	724872	Male	ATCC	2	-3.47027	CVCL_1693	1479	lung	Primary	Lung Cancer	Small Cell Lung Cancer (SCLC)	54	SIDM01078	lung	SCLC	#N/A	#N/A
ACH-000793	KATO III	KATOIII	KATOIII_STOMACH	#N/A	907276	Male	ATCC	2	-4.58917	CVCL_0371	406	pleural_effusion	Metastasis	Gastric Cancer	Adenocarcinoma, signet ring cell	55	SIDM00687	gastric	gastric_adenocarcinoma	signet_ring_cell	#N/A
ACH-000794	BICR 22	BICR22	BICR22_UPPER_AERODIGESTIVE_TRACT	#N/A	1240121	Male	ECACC	2	-4.1027	CVCL_2310	1575	lymph_node	Metastasis	Head and Neck Cancer	Squamous Cell Carcinoma, oral	#N/A	SIDM00485	upper_aerodigestive	upper_aerodigestive_squamous	oral	#N/A
ACH-000799	Hs 695T	HS695T	HS695T_SKIN	#N/A	#N/A	Male	ATCC	2	-3.06351	CVCL_0851	#N/A	lymph_node	Metastasis	Skin Cancer	Melanoma, amelanotic	26	#N/A	skin	melanoma	amelanotic	#N/A
ACH-000800	NCI-H446	NCIH446	NCIH446_LUNG	#N/A	688023	Male	ATCC	2	-2.9557	CVCL_1562	1222	pleural_effusion	Metastasis	Lung Cancer	Small Cell Lung Cancer (SCLC)	61	SIDM00965	lung	SCLC	#N/A	#N/A
ACH-000805	COLO-679	COLO679	COLO679_SKIN	#N/A	906818	Female	DSMZ	2	-3.09326	CVCL_1130	2049	skin	Metastasis	Skin Cancer	Melanoma	47	SIDM00284	skin	melanoma	#N/A	#N/A
ACH-000809	KYSE-410	KYSE410	KYSE410_OESOPHAGUS	#N/A	753574	Male	DSMZ	2	-4.25481	CVCL_1352	952	oesophagus	Primary	Esophageal Cancer	Squamous Cell Carcinoma	51	SIDM01028	esophagus	esophagus_squamous	#N/A	#N/A
ACH-000810	SK-MEL-30	SKMEL30	SKMEL30_SKIN	#N/A	909726	Male	DSMZ	1	-2.65097	CVCL_0039	1789	skin	Metastasis	Skin Cancer	Melanoma	67	SIDM00392	skin	melanoma	#N/A	#N/A
ACH-000817	RPMI 8226	RPMI8226	RPMI8226_HAEMATOPOIETIC_AND_LYMPHOID_TISSUE	#N/A	905964	Male	ATCC	2	-2.79664	CVCL_0014	705	haematopoietic_and_lymphoid_tissue	Primary	Myeloma	Multiple Myeloma, plasmacytoma	61	SIDM00087	plasma_cell	multiple_myeloma	plasmacytoma	#N/A
ACH-000819	LN-18	LN18	LN18_CENTRAL_NERVOUS_SYSTEM	#N/A	1240168	Male	ATCC	2	-3.92283	CVCL_0392	1503	central_nervous_system	Primary	Brain Cancer	Glioblastoma	65	SIDM00685	central_nervous_system	glioma	glioblastoma	#N/A
ACH-000820	SW403	SW403	SW403_LARGE_INTESTINE	#N/A	#N/A	Female	ATCC	1	-1.56987	CVCL_0545	#N/A	Colon	Primary	Colon/Colorectal Cancer	Adenocarcinoma	51	SIDM00836	colorectal	colorectal_adenocarcinoma	#N/A	#N/A
ACH-000824	KYSE-510	KYSE510	KYSE510_OESOPHAGUS	#N/A	907321	Female	DSMZ	2	-3.4473	CVCL_1354	893	oesophagus	Primary	Esophageal Cancer	Squamous Cell Carcinoma	67	SIDM01026	esophagus	esophagus_squamous	#N/A	#N/A
ACH-000827	WM-793	WM793	WM793_SKIN	#N/A	1299081	Male	WISTAR	2	-4.51664	CVCL_8787	114	skin	#N/A	Skin Cancer	Melanoma	#N/A	SIDM00973	skin	melanoma	#N/A	#N/A
ACH-000831	HEC-50B	HEC50B	HEC50B_ENDOMETRIUM	#N/A	#N/A	Female	HSRRB	2	-3.88729	CVCL_2929	#N/A	ascites	Metastasis	Endometrial/Uterine Cancer	Endometrial Adenocarcinoma	#N/A	#N/A	uterus	endometrial_adenocarcinoma	#N/A	#N/A
ACH-000832	CAL 27	CAL27	CAL27_UPPER_AERODIGESTIVE_TRACT	#N/A	910916	Male	ATCC	1	-3.42861	CVCL_1107	1911	upper_aerodigestive_tract	Primary	Head and Neck Cancer	Squamous Cell Carcinoma	56	SIDM00937	upper_aerodigestive	upper_aerodigestive_squamous	#N/A	#N/A
ACH-000833	RH-30	RH30	RH30_SOFT_TISSUE	#N/A	#N/A	Male	DSMZ	2	-3.36345	CVCL_0041	#N/A	bone_marrow	Metastasis	Sarcoma	Rhabdomyosarcoma, alveolar	17	#N/A	soft_tissue	rhabdomyosarcoma	alveolar	#N/A
ACH-000842	SW 480	SW480	SW480_LARGE_INTESTINE	#N/A	#N/A	Male	ATCC	#N/A	#N/A	CVCL_0546	#N/A	lymph_node	Primary	Colon/Colorectal Cancer	Adenocarcinoma	50	SIDM00840	colorectal	colorectal_adenocarcinoma	#N/A	#N/A
ACH-000846	FaDu	FADU	FADU_UPPER_AERODIGESTIVE_TRACT	#N/A	906863	Male	ATCC	2	-3.05071	CVCL_1218	1170	upper_aerodigestive_tract	Primary	Head and Neck Cancer	Squamous Cell Carcinoma	56	SIDM00860	upper_aerodigestive	upper_aerodigestive_squamous	#N/A	#N/A
ACH-000847	HGC-27	HGC27	HGC27_STOMACH	#N/A	907055	Unknown	ECACC	2	-2.82999	CVCL_1279	1102	lymph_node	Metastasis	Gastric Cancer	Adenocarcinoma	#N/A	SIDM00290	gastric	gastric_adenocarcinoma	#N/A	#N/A
ACH-000848	JHH-7	JHH7	JHH7_LIVER	#N/A	1240160	Male	HSRRB	2	-4.14595	CVCL_2805	1038	liver	Primary	Liver Cancer	Hepatocellular Carcinoma	53	SIDM00614	liver	hepatocellular_carcinoma	#N/A	#N/A
ACH-000849	MDA-MB-468	MDAMB468	MDAMB468_BREAST	#N/A	908123	Female	ATCC	1	-4.48105	CVCL_0419	415	pleural_effusion	Metastasis	Breast Cancer	Carcinoma	51	SIDM00628	breast	breast_carcinoma	ERneg_HER2neg	basal_A
ACH-000852	NCI-H1435	NCIH1435	NCIH1435_LUNG	#N/A	1298347	Female	ATCC	#N/A	#N/A	CVCL_1470	2119	lung	Primary	Lung Cancer	Non-Small Cell Lung Cancer (NSCLC), Adenocarcinoma	35	SIDM00658	lung	NSCLC	NSCLC_adenocarcinoma	#N/A
ACH-000853	NCI-H661	NCIH661	NCIH661_LUNG	#N/A	687829	Male	ATCC	2	-4.40138	CVCL_1577	107	lymph_node	Metastasis	Lung Cancer	Non-Small Cell Lung Cancer (NSCLC), Large Cell Carcinoma	43	SIDM01122	lung	NSCLC	NSCLC_large_cell	#N/A
ACH-000855	KYSE-150	KYSE150	KYSE150_OESOPHAGUS	#N/A	907317	Female	DSMZ	2	-3.33154	CVCL_1348	407	oesophagus	Primary	Esophageal Cancer	Squamous Cell Carcinoma	49	SIDM01031	esophagus	esophagus_squamous	#N/A	#N/A
ACH-000856	CAL-51	CAL51	CAL51_BREAST	#N/A	910927	Female	DSMZ	3	-4.21741	CVCL_1110	4	pleural_effusion	Metastasis	Breast Cancer	Carcinoma	45	SIDM00933	breast	breast_carcinoma	ERneg_HER2neg	basal_B
ACH-000857	CAL-85-1	CAL851	CAL851_BREAST	#N/A	910852	Female	DSMZ	#N/A	#N/A	CVCL_1114	113	breast	Primary	Breast Cancer	Carcinoma	35	SIDM00928	breast	breast_carcinoma	ERneg_HER2neg	basal_A
ACH-000859	HCC1954	HCC1954	HCC1954_BREAST	#N/A	749709	Female	ATCC	2	-2.61595	CVCL_1259	2143	breast	Primary	Breast Cancer	Breast Ductal Carcinoma	61	SIDM00872	breast	breast_ductal_carcinoma	ERneg_HER2pos	basal_A
ACH-000860	NCI-H358	NCIH358	NCIH358_LUNG	#N/A	908465	Male	ATCC	2	-3.23449	CVCL_1559	1691	lung	Primary	Lung Cancer	Non-Small Cell Lung Cancer (NSCLC), Adenocarcinoma	#N/A	SIDM00718	lung	NSCLC	NSCLC_adenocarcinoma	#N/A
ACH-000865	KYSE-450	KYSE450	KYSE450_OESOPHAGUS	#N/A	907320	Male	DSMZ	2	-4.86001	CVCL_1353	60	oesophagus	Primary	Esophageal Cancer	Squamous Cell Carcinoma	59	SIDM01027	esophagus	esophagus_squamous	#N/A	#N/A
ACH-000866	NCI-H1048	NCIH1048	NCIH1048_LUNG	#N/A	687995	Female	ATCC	2	-5.18445	CVCL_1453	1875	pleural_effusion	Metastasis	Lung Cancer	Small Cell Lung Cancer (SCLC)	#N/A	SIDM00654	lung	SCLC	#N/A	#N/A
ACH-000867	ChaGo-K-1	CHAGOK1	CHAGOK1_LUNG	#N/A	687596	Male	ECACC	2	-4.97411	CVCL_1121	1605	lung	Metastasis	Lung Cancer	Non-Small Cell Lung Cancer (NSCLC), unspecified	45	SIDM00924	lung	NSCLC	#N/A	#N/A
ACH-000869	NCI-H1568	NCIH1568	NCIH1568_LUNG	#N/A	1298348	Female	ATCC	2	-4.24981	CVCL_1476	711	lymph_node	Metastasis	Lung Cancer	Non-Small Cell Lung Cancer (NSCLC), Adenocarcinoma	48	SIDM00750	lung	NSCLC	NSCLC_adenocarcinoma	#N/A
ACH-000878	HCC-15	HCC15	HCC15_LUNG	#N/A	1240143	Male	DSMZ	2	-1.47249	CVCL_2057	1368	lung	Primary	Lung Cancer	Non-Small Cell Lung Cancer (NSCLC), Squamous Cell Carcinoma	47	SIDM01072	lung	NSCLC	NSCLC_squamous	#N/A
ACH-000879	MFE-296	MFE296	MFE296_ENDOMETRIUM	#N/A	908130	Female	DSMZ	#N/A	#N/A	CVCL_1406	920	endometrium	Primary	Endometrial/Uterine Cancer	Endometrial Adenocarcinoma	68	SIDM00334	uterus	endometrial_adenocarcinoma	#N/A	#N/A
ACH-000880	AGS	AGS	AGS_STOMACH	#N/A	906790	Female	ATCC	2	-3.46694	CVCL_0139	1011	stomach	Primary	Gastric Cancer	Adenocarcinoma	54	SIDM00850	gastric	gastric_adenocarcinoma	#N/A	#N/A
ACH-000881	MEL-JUSO	MELJUSO	MELJUSO_SKIN	#N/A	908125	Female	DSMZ	2	-3.90593	CVCL_1403	626	skin	Primary	Skin Cancer	Melanoma	58	SIDM00336	skin	melanoma	#N/A	#N/A
ACH-000882	IGR-1	IGR1	IGR1_SKIN	#N/A	907169	Male	DSMZ	2	-4.92604	CVCL_1303	1534	lymph_node	Metastasis	Skin Cancer	Melanoma	42	SIDM01060	skin	melanoma	#N/A	#N/A
ACH-000883	SW 1783	SW1783	SW1783_CENTRAL_NERVOUS_SYSTEM	#N/A	909750	Male	ATCC	#N/A	#N/A	CVCL_1722	1453	central_nervous_system	Primary	Brain Cancer	Astrocytoma	68	SIDM01164	central_nervous_system	glioma	astrocytoma	#N/A
ACH-000886	NCI-H2009	NCIH2009	NCIH2009_LUNG	#N/A	724873	Female	ATCC	2	-5.10551	CVCL_1514	79	lymph_node	Metastasis	Lung Cancer	Non-Small Cell Lung Cancer (NSCLC), Adenocarcinoma	68	SIDM00756	lung	NSCLC	NSCLC_adenocarcinoma	#N/A
ACH-000888	NCI-H1793	NCIH1793	NCIH1793_LUNG	#N/A	908463	Female	ATCC	2	-4.3724	CVCL_1496	934	lung	Primary	Lung Cancer	Non-Small Cell Lung Cancer (NSCLC), Adenocarcinoma	52	SIDM00755	lung	NSCLC	NSCLC_adenocarcinoma	#N/A
ACH-000890	SW 1271	SW1271	SW1271_LUNG	#N/A	1299062	Male	ATCC	2	-2.98687	CVCL_1716	2037	lung	Primary	Lung Cancer	Small Cell Lung Cancer (SCLC)	69	SIDM01156	lung	SCLC	#N/A	#N/A
ACH-000895	CL-34	CL34	CL34_LARGE_INTESTINE	#N/A	1290771	Female	DSMZ	#N/A	#N/A	CVCL_1980	1005	Colon	Primary	Colon/Colorectal Cancer	Adenocarcinoma	#N/A	SIDM00945	colorectal	colorectal_adenocarcinoma	#N/A	MSI
ACH-000898	SNU-719	SNU719	SNU719_STOMACH	#N/A	#N/A	Male	KCLB	2	-3.47392	CVCL_5086	#N/A	stomach	Primary	Gastric Cancer	Adenocarcinoma, tubular	53	#N/A	gastric	gastric_adenocarcinoma	tubular	#N/A
ACH-000899	WM-88	WM88	WM88_SKIN	#N/A	#N/A	Male	Academic lab	1	-2.74944	CVCL_6805	#N/A	skin	Metastasis	Skin Cancer	Melanoma	#N/A	#N/A	skin	melanoma	#N/A	#N/A
ACH-000900	NCI-H23	NCIH23	NCIH23_LUNG	#N/A	905942	Male	ATCC	4	-3.48627	CVCL_1547	2108	lung	Primary	Lung Cancer	Non-Small Cell Lung Cancer (NSCLC), Adenocarcinoma	51	SIDM00138	lung	NSCLC	NSCLC_adenocarcinoma	#N/A
ACH-000909	JHUEM-2	JHUEM2	JHUEM2_ENDOMETRIUM	#N/A	#N/A	Female	RIKEN	#N/A	#N/A	CVCL_4656	#N/A	endometrium	Primary	Endometrial/Uterine Cancer	Endometrial Adenocarcinoma	62	#N/A	uterus	endometrial_adenocarcinoma	#N/A	#N/A
ACH-000910	MDA-MB-453	MDAMB453	MDAMB453_BREAST	#N/A	908122	Female	ATCC	3	-3.87918	CVCL_0418	101	pericardial_effusion	Metastasis	Breast Cancer	Carcinoma	48	SIDM00272	breast	breast_carcinoma	ERneg_HER2neg	HER2_amp
ACH-000911	NUGC-3	NUGC3	NUGC3_STOMACH	#N/A	908455	Male	JHSF	2	-4.6791	CVCL_1612	1251	soft_tissue	Metastasis	Gastric Cancer	Adenocarcinoma	72	SIDM00572	gastric	gastric_adenocarcinoma	#N/A	#N/A
ACH-000912	NCI-H2286	NCIH2286	NCIH2286_LUNG	#N/A	#N/A	Female	ATCC	2	-4.86029	CVCL_1545	#N/A	lung	Primary	Lung Cancer	Small Cell Lung Cancer (SCLC)	57	SIDM00017	lung	SCLC	#N/A	#N/A
ACH-000915	IPC-298	IPC298	IPC298_SKIN	#N/A	907171	Female	DSMZ	1	-5.8013	CVCL_1307	77	skin	Primary	Skin Cancer	Melanoma	64	SIDM01059	skin	melanoma	#N/A	#N/A
ACH-000916	NCI-H1573	NCIH1573	NCIH1573_LUNG	#N/A	908472	Female	ATCC	2	-1.34989	CVCL_1478	372	soft_tissue	Metastasis	Lung Cancer	Non-Small Cell Lung Cancer (NSCLC), Adenocarcinoma	35	SIDM00749	lung	NSCLC	NSCLC_adenocarcinoma	#N/A
ACH-000917	TE-4	TE4	TE4_OESOPHAGUS	#N/A	1503371	Female	RIKEN	2	-3.8284	CVCL_3337	382	lymph_node	#N/A	Esophageal Cancer	Squamous Cell Carcinoma	#N/A	SIDM00250	esophagus	esophagus_squamous	#N/A	#N/A
ACH-000919	IM95	IM95	IM95_STOMACH	#N/A	1240155	Male	HSRRB	0	-2.04524	CVCL_2961	405	stomach	Primary	Gastric Cancer	Adenocarcinoma	63	SIDM00602	gastric	gastric_adenocarcinoma	#N/A	#N/A
ACH-000922	RCH-ACV	RCHACV	RCHACV_HAEMATOPOIETIC_AND_LYMPHOID_TISSUE	#N/A	1330994	Female	DSMZ	2	-4.59813	CVCL_1851	1160	bone_marrow	#N/A	Leukemia	Acute Lymphoblastic Leukemia (ALL), B-cell	8	SIDM00449	blood	ALL	b_cell	#N/A
ACH-000924	NCI-H2172	NCIH2172	NCIH2172_LUNG	#N/A	1298353	Female	ATCC	2	-4.91201	CVCL_1537	1692	lung	Primary	Lung Cancer	Non-Small Cell Lung Cancer (NSCLC), unspecified	#N/A	SIDM00926	lung	NSCLC	#N/A	#N/A
ACH-000925	DV-90	DV90	DV90_LUNG	#N/A	#N/A	Male	DSMZ	#N/A	#N/A	CVCL_1184	#N/A	pleural_effusion	Metastasis	Lung Cancer	Non-Small Cell Lung Cancer (NSCLC), Adenocarcinoma	50	#N/A	lung	NSCLC	NSCLC_adenocarcinoma	#N/A
ACH-000926	HT55	HT55	HT55_LARGE_INTESTINE	#N/A	907287	Unknown	ECACC	3	-2.82414	CVCL_1294	1688	large_intestine	Primary	Colon/Colorectal Cancer	Adenocarcinoma	#N/A	SIDM00541	colorectal	colorectal_adenocarcinoma	#N/A	#N/A
ACH-000929	NCI-H2110	NCIH2110	NCIH2110_LUNG	#N/A	1298351	Unknown	ATCC	2	-2.47095	CVCL_1530	1948	pleural_effusion	Metastasis	Lung Cancer	Non-Small Cell Lung Cancer (NSCLC), unspecified	#N/A	SIDM00703	lung	NSCLC	#N/A	#N/A
ACH-000932	SNU-1	SNU1	SNU1_STOMACH	#N/A	908444	Male	ATCC	2	-4.3561	CVCL_0099	564	stomach	Metastasis	Gastric Cancer	Adenocarcinoma	44	SIDM01146	gastric	gastric_adenocarcinoma	#N/A	#N/A
ACH-000935	MDST8	MDST8	MDST8_LARGE_INTESTINE	#N/A	1240173	Unknown	ECACC	3	-2.85059	CVCL_2588	928	large_intestine	#N/A	Colon/Colorectal Cancer	Adenocarcinoma	#N/A	SIDM00527	colorectal	colorectal_adenocarcinoma	#N/A	#N/A
ACH-000938	NALM-6	NALM6	NALM6_HAEMATOPOIETIC_AND_LYMPHOID_TISSUE	#N/A	908158	Male	DSMZ	2	-4.19532	CVCL_0092	973	haematopoietic_and_lymphoid_tissue	Primary	Leukemia	Acute Lymphoblastic Leukemia (ALL), B-cell	19	SIDM00429	blood	ALL	b_cell	#N/A
ACH-000943	RKO	RKO	RKO_LARGE_INTESTINE	#N/A	909698	Unknown	ATCC	3	-4.99166	CVCL_0504	607	Colon	Primary	Colon/Colorectal Cancer	Adenocarcinoma	#N/A	SIDM01090	colorectal	colorectal_adenocarcinoma	#N/A	MSI
ACH-000945	NCI-H650	NCIH650	NCIH650_LUNG	#N/A	722066	Male	ATCC	#N/A	#N/A	CVCL_1575	1539	lung	Metastasis	Lung Cancer	Non-Small Cell Lung Cancer (NSCLC), Adenocarcinoma	#N/A	SIDM01124	lung	NSCLC	NSCLC_adenocarcinoma	#N/A
ACH-000946	HEC-265	HEC265	HEC265_ENDOMETRIUM	#N/A	#N/A	Female	HSRRB	2	-3.59521	CVCL_2928	#N/A	endometrium	Primary	Endometrial/Uterine Cancer	Endometrial Adenocarcinoma	#N/A	#N/A	uterus	endometrial_adenocarcinoma	#N/A	#N/A
ACH-000954	HEC-1-A	HEC1A	HEC1A_ENDOMETRIUM	#N/A	#N/A	Female	ATCC	0	-1.83053	CVCL_0293	#N/A	endometrium	Primary	Endometrial/Uterine Cancer	Endometrial Adenocarcinoma	71	SIDM00595	uterus	endometrial_adenocarcinoma	#N/A	#N/A
ACH-000956	22Rv1	22RV1	22RV1_PROSTATE	22-RV1	924100	Male	ATCC	#N/A	#N/A	CVCL_1045	1027	prostate	Primary	Prostate Cancer	Adenocarcinoma	#N/A	SIDM00499	prostate	prostate_adenocarcinoma	#N/A	#N/A
ACH-000957	LS 180	LS180	LS180_LARGE_INTESTINE	#N/A	998189	Female	ATCC	2	-2.64705	CVCL_0397	2081	Colon	Primary	Colon/Colorectal Cancer	Adenocarcinoma	58	SIDM00680	colorectal	colorectal_adenocarcinoma	#N/A	MSI
ACH-000958	SW48	SW48	SW48_LARGE_INTESTINE	#N/A	909751	Female	ATCC	2	-2.54259	CVCL_1724	1	Colon	Primary	Colon/Colorectal Cancer	Adenocarcinoma	82	SIDM00837	colorectal	colorectal_adenocarcinoma	#N/A	MSI
ACH-000960	Reh	REH	REH_HAEMATOPOIETIC_AND_LYMPHOID_TISSUE	#N/A	909696	Female	ATCC	2	-4.12674	CVCL_1650	1272	haematopoietic_and_lymphoid_tissue	Primary	Leukemia	Acute Lymphoblastic Leukemia (ALL), B-cell	15	SIDM00447	blood	ALL	b_cell	#N/A
ACH-000961	Ishikawa (Heraklio) 02 ER-	ISHIKAWAHERAKLIO02ER	ISHIKAWAHERAKLIO02ER_ENDOMETRIUM	#N/A	#N/A	Female	ECACC	2	-2.97524	CVCL_6543	#N/A	endometrium	Primary	Endometrial/Uterine Cancer	Endometrial Adenocarcinoma	39	SIDM00037	uterus	endometrial_adenocarcinoma	#N/A	#N/A
ACH-000963	CCK-81	CCK81	CCK81_LARGE_INTESTINE	#N/A	1240123	Female	HSRRB	3	-1.64135	CVCL_2873	1915	large_intestine	Metastasis	Colon/Colorectal Cancer	Adenocarcinoma	#N/A	SIDM00487	colorectal	colorectal_adenocarcinoma	#N/A	MSI
ACH-000966	IGROV1	IGROV1	IGROV1_OVARY	#N/A	905968	Female	NCI/DCTD	#N/A	#N/A	CVCL_1304	1215	ovary	Primary	Ovarian Cancer	Adenocarcinoma, mixed	47	SIDM00151	ovary	ovary_adenocarcinoma	mixed_endometrioid_clear_cell	#N/A
ACH-000967	SNU-C2A	SNUC2A	SNUC2A_LARGE_INTESTINE	#N/A	#N/A	Female	ATCC	#N/A	#N/A	CVCL_1709	#N/A	large_intestine	Primary	Colon/Colorectal Cancer	Adenocarcinoma	43	SIDM00780	colorectal	colorectal_adenocarcinoma	#N/A	MSI
ACH-000970	SNU-C5	SNUC5	SNUC5_LARGE_INTESTINE	#N/A	1674021	Female	KCLB	#N/A	#N/A	CVCL_5112	152	Colon	#N/A	Colon/Colorectal Cancer	Adenocarcinoma	77	SIDM00498	colorectal	colorectal_adenocarcinoma	#N/A	#N/A
ACH-000971	HCT 116	HCT116	HCT116_LARGE_INTESTINE	#N/A	905936	Male	ATCC	#N/A	#N/A	CVCL_0291	1920	large_intestine	Primary	Colon/Colorectal Cancer	Adenocarcinoma	#N/A	SIDM00783	colorectal	colorectal_adenocarcinoma	#N/A	MSI
ACH-000974	SNG-M	SNGM	SNGM_ENDOMETRIUM	#N/A	909735	Female	HSRRB	2	-3.48987	CVCL_1707	2058	lymph_node	Metastasis	Endometrial/Uterine Cancer	Endometrial Adenocarcinoma	52	SIDM00373	uterus	endometrial_adenocarcinoma	#N/A	#N/A
ACH-000977	LNCaP clone FGC	LNCAPCLONEFGC	LNCAPCLONEFGC_PROSTATE	LNCAPCLONEFGC, LN-Cap-cloneFGC, LNCaP clone FGC	907788	Male	ATCC	2	-3.48426	CVCL_1379	2080	lymph_node	Metastasis	Prostate Cancer	Adenocarcinoma	50	SIDM00683	prostate	prostate_adenocarcinoma	#N/A	#N/A
ACH-000979	DU 145	DU145	DU145_PROSTATE	#N/A	905935	Male	ATCC	#N/A	#N/A	CVCL_0105	872	central_nervous_system	Metastasis	Prostate Cancer	Adenocarcinoma	69	SIDM00120	prostate	prostate_adenocarcinoma	#N/A	#N/A
ACH-000980	NCI-H1155	NCIH1155	NCIH1155_LUNG	#N/A	908467	Male	ATCC	2	-6.51951	CVCL_1456	801	lymph_node	Metastasis	Lung Cancer	Non-Small Cell Lung Cancer (NSCLC), Large Cell Carcinoma	36	SIDM00651	lung	NSCLC	NSCLC_large_cell	#N/A
ACH-000984	HEC-6	HEC6	HEC6_ENDOMETRIUM	#N/A	#N/A	Female	HSRRB	2	-2.90168	CVCL_2931	#N/A	endometrium	Primary	Endometrial/Uterine Cancer	Endometrial Adenocarcinoma	#N/A	#N/A	uterus	endometrial_adenocarcinoma	#N/A	#N/A
ACH-000985	LS411N	LS411N	LS411N_LARGE_INTESTINE	#N/A	907794	Male	ATCC	#N/A	#N/A	CVCL_1385	724	large_intestine	Primary	Colon/Colorectal Cancer	Adenocarcinoma	32	SIDM00660	colorectal	colorectal_adenocarcinoma	#N/A	MSI
ACH-000986	HT115	HT115	HT115_LARGE_INTESTINE	#N/A	907289	Unknown	ECACC	3	-3.69	CVCL_2520	2099	Colon	#N/A	Colon/Colorectal Cancer	Adenocarcinoma	#N/A	SIDM00534	colorectal	colorectal_adenocarcinoma	#N/A	#N/A
ACH-000987	MeWo	MEWO	MEWO_SKIN	#N/A	908128	Male	ATCC	#N/A	#N/A	CVCL_0445	102	lymph_node	Metastasis	Skin Cancer	Melanoma	78	SIDM00545	skin	melanoma	#N/A	#N/A
ACH-000988	MFE-319	MFE319	MFE319_ENDOMETRIUM	#N/A	1240174	Female	DSMZ	2	-3.84753	CVCL_2112	1816	endometrium	#N/A	Endometrial/Uterine Cancer	#N/A	81	SIDM00333	uterus	endometrial_adenocarcinoma	#N/A	#N/A
ACH-000990	HEC-108	HEC108	HEC108_ENDOMETRIUM	#N/A	#N/A	Female	HSRRB	#N/A	#N/A	CVCL_2923	#N/A	endometrium	Primary	Endometrial/Uterine Cancer	Endometrial Adenocarcinoma	#N/A	#N/A	uterus	endometrial_adenocarcinoma	#N/A	#N/A
ACH-000994	HEC-59	HEC59	HEC59_ENDOMETRIUM	#N/A	#N/A	Female	HSRRB	2	-3.89199	CVCL_2930	#N/A	endometrium	Primary	Endometrial/Uterine Cancer	Endometrial Adenocarcinoma	#N/A	#N/A	uterus	endometrial_adenocarcinoma	#N/A	#N/A
ACH-000996	HEC-251	HEC251	HEC251_ENDOMETRIUM	#N/A	#N/A	Female	HSRRB	2	-2.95119	CVCL_2927	#N/A	endometrium	Primary	Endometrial/Uterine Cancer	Endometrial Adenocarcinoma	#N/A	#N/A	uterus	endometrial_adenocarcinoma	#N/A	#N/A
ACH-000997	HCT-15	HCT15	HCT15_LARGE_INTESTINE	#N/A	905937	Male	ATCC	#N/A	#N/A	CVCL_0292	1553	large_intestine	Primary	Colon/Colorectal Cancer	Adenocarcinoma	#N/A	SIDM00789	colorectal	colorectal_adenocarcinoma	#N/A	MSI
ACH-001075	NCI-H292	NCIH292	NCIH292_LUNG	H292	753604	Female	ATCC	1	-2.94034	CVCL_0455	935	lymph_node	Metastasis	Lung Cancer	Non-Small Cell Lung Cancer (NSCLC), Mucoepidermoid Carcinoma	32	SIDM00493	lung	NSCLC	NSCLC_mucoepidermoid	#N/A
ACH-001129	MONO-MAC-1	MONOMAC1	MONOMAC1_HAEMATOPOIETIC_AND_LYMPHOID_TISSUE	#N/A	#N/A	Male	DSMZ	2	-1.69084	CVCL_1425	#N/A	haematopoietic_and_lymphoid_tissue	Primary	Leukemia	Acute Myelogenous Leukemia (AML)	64	SIDM01022	blood	AML	#N/A	#N/A
ACH-001190	SK-MEL-2	SKMEL2	SKMEL2_SKIN	#N/A	905955	Male	ATCC	2	-3.78783	CVCL_0069	1191	skin	Metastasis	Skin Cancer	Melanoma	60	SIDM00082	skin	melanoma	#N/A	#N/A
ACH-001239	WM-266-4	WM2664	WM2664_SKIN	#N/A	#N/A	Female	ATCC	2	-4.26138	CVCL_2765	#N/A	skin	Metastasis	Skin Cancer	Melanoma	58	SIDM00979	skin	melanoma	#N/A	#N/A
ACH-001306	8305C	8305C	8305C_THYROID	#N/A	906795	Female	DSMZ	2	-4.77852	CVCL_1053	433	thyroid	Primary	Thyroid Cancer	Carcinoma	67	SIDM00997	thyroid	thyroid_carcinoma	#N/A	#N/A
ACH-001307	8505C	8505C	8505C_THYROID	#N/A	924102	Female	HSRRB	2	-3.18497	CVCL_1054	868	thyroid	Primary	Thyroid Cancer	Carcinoma	78	SIDM00996	thyroid	thyroid_carcinoma	#N/A	#N/A

## Sheet: Cell lines per category
Chromosome arm	Cells with chm arm loss	Cells with neutral ploidy for chrm arm	Cells with chm arm gain
1p	86	249	32
1q	38	240	89
2p	45	273	49
2q	62	268	37
3p	153	198	16
3q	39	248	80
4p	152	198	17
4q	164	191	12
5p	30	199	138
5q	83	245	39
6p	71	251	45
6q	134	211	22
7p	42	183	142
7q	48	197	122
8p	181	154	32
8q	46	211	110
9p	171	165	31
9q	99	220	48
10p	128	205	34
10q	112	234	21
11p	98	232	37
11q	91	219	57
12p	77	219	71
12q	59	275	33
13q	147	184	36
14q	94	225	48
15q	107	239	21
16p	105	230	32
16q	96	235	36
17p	139	196	32
17q	48	260	59
18p	111	199	57
18q	191	157	19
19p	138	209	20
19q	87	219	61
20p	87	183	97
20q	20	202	145
21q	119	214	34
22q	138	207	22
