# Supplementary material for: Extensive protein dosage compensation in aneuploid human cancers
Source: HighWire-hosted journal article supplement (doi:10.1101/gr.276378.121), 2022-06-14
Supplement: Supplemental_Table_S3.xlsx [file Supplemental_Table_S3.xlsx]

## Sheet: Legend Table S3
Supplemental Table 3. Gene expression differences in control datasets
1) Info- Information about collumn names and meaning for Supplemental Table 3
2) Overview Control Dataset- An overview of average protein expression difference and percent change upon chromosome gain and loss in control datasets
3-8) Control datasets.-Gene expression differences (log2 fold change)upon chromosome gain and loss for the specified control dataset
9) List flipped genes- list of genes considered "flipped" per cell line. Where genes are considered flipped if they increase in copy number on a lost chromosome or decrease in copy number on a gained chromosome
10) RPPA data- Gene expression difference (log2 fold change) upon chromosome gain and loss, based on RPPA protein expression data
11) Yeast data- Gene expression difference (log2 fold change) upon chromosome gain and loss, based on aneuploid yeast protein expression data

## Sheet: Info
Difference upon chromosome gain and loss in multiple controlled datasets
Difference data per gene, for RNA and protein expression differences (log2 fold change) upon the gain or loss of the chromosome arm the gene is located on.
Sheet name	Data located in sheet
Overview_Control_datasets	An overview of average protein expression difference and percent change upon chromosome gain and loss in control datasets
No_Mutations	Gene expression difference (log2 fold change) upon chromosome gain and loss, having removed all mutated genes
No_Flipped	Gene expression difference (log2 fold change) upon chromosome gain and loss, having removed all "flipped" genes, those lost on a chromosome gain or gained upon a chromosome loss
No_Low_Expression	Gene expression difference (log2 fold change) upon chromosome gain and loss, having removed the bottom 20% of genes with the lowest mean RNA expression
No_Low_Reproducibility	Gene expression difference (log2 fold change) upon chromosome gain and loss, having removed genes with the lowest 20% of reproducibility scores, or genes without a score
Merge_Control	Gene expression difference (log2 fold change) upon chromosome gain and loss, having removed all mutated genes, flipped genes, low expression genes and low reproducibility genes.
NSCLC_Only	Gene expression difference (log2 fold change) upon chromosome gain and loss, analyzing only non-small cell lung cancer cell lines (64 total)
RPPA_data	Gene expression difference (log2 fold change) upon chromosome gain and loss, based on RPPA protein expression data
Yeast_data	Gene expression difference (log2 fold change) upon chromosome gain and loss, based on aneuploid yeast protein expression data
Column name	Information
Gene_Symbol	Gene Symbol
RNA_ID	Gene Symbol and Entrez Gene ID (format: GENE_ID..ENTREZ_ID.)
RNA.Pvalue.Gain	P-value associated with difference in expression upon chromosome arm gain, for RNA values
RNA.Difference.Gain	Difference in RNA expression (log2 fold change) between cells with a chromosome arm gain vs those with neutral arm ploidy
RNA.Pvalue.Loss	P-value associated with difference in expression upon chromosome arm loss, for RNA values
RNA.Difference.Loss	Difference in RNA expression (log2 fold change) between cells with a chromosome arm loss vs those with neutral arm ploidy
RNA.Pvalue.Gain vs Loss	P-value associated with difference in expression between cells with chromosome arm gain and loss, for RNA values
RNA.Difference Gain vs Loss	Difference in RNA expression (log2 fold change) between cells with a chromosome arm gain vs those a chromosome arm loss
Protein_ID	UniProt ID
Protein.Pvalue.Gain	P-value associated with difference in expression upon chromosome arm gain, for Protein values
Protein.Difference.Gain	Difference in Protein expression (log2 fold change) between cells with a chromosome arm gain vs those with neutral arm ploidy
Protein.Pvalue.Loss	P-value associated with difference in expression upon chromosome arm loss, for Protien values
Protein.Diff.Loss	Difference in Protein expression (log2 fold change) between cells with a chromosome arm loss vs those with neutral arm ploidy
Protein.Pvalue.Gain vs Loss	P-value associated with difference in expression between cells with chromosome arm gain and loss, for Protein values
Protein.Difference.Gain vs Loss	Difference in Protein expression (log2 fold change) between cells with a chromosome arm gain vs those a chromosome arm loss
RNA.Gain.Difference.Category	Difference category for RNA upon chromosome arm gain
RNA.Loss.Difference.Category	Difference category for RNA upon chromosome arm loss
Protein.Gain.Difference.Category	Difference category for protein upon chromosome arm gain
Protein.Loss.Difference.Category	Difference category for protein upon chromosome arm loss

## Sheet: Overview_Control_dataset
	Data	Num.Genes	Diff.Gain.RNA	Diff.Gain.Protein	Diff.Loss.RNA	Diff.Loss.Protein		Percent.Gain.RNA	Percent.Gain.Protein	Percent.Loss.RNA	Percent.Loss.Protein
1	All	9414	0.283976	0.160329	-0.240443	-0.126838		0.217546	0.117542	-0.153515	-0.0841636
2	No mutations	9411	0.284127	0.160403	-0.240445	-0.126848		0.217673	0.117599	-0.153516	-0.0841696
3	No flipped genes	9389	0.292753	0.162151	-0.2649	-0.13373		0.224976	0.118955	-0.167744	-0.0885283
4	No low RNA expression	9257	0.288426	0.16242	-0.24328	-0.127627		0.221307	0.119163	-0.155177	-0.0846645
5	No low reproducibility genes	4006	0.306795	0.183083	-0.241585	-0.135606		0.236957	0.135307	-0.154185	-0.0897127
6	Merge: no mutations, flipped, low RNA or low reproducibility genes	4010	0.306561	0.182963	-0.241267	-0.135569		0.236756	0.135213	-0.153998	-0.0896893
7	NSCLC	1684	0.257015	0.179511	-0.356836	-0.155334		0.195004	0.1325	-0.219125	-0.102076
	Please note that difference (log2 fold change) and percent change are different values

## Sheet: No_Mutations
	Gene_Symbol	RNA_ID	RNA.Pvalue.Gain	RNA.Difference.Gain	RNA.Pvalue.Loss	RNA.Difference.Loss	RNA.Pvalue.Gain vs Loss	RNA.Difference Gain vs Loss	Protein_ID	Protein.Pvalue.Gain	Protein.Difference.Gain	Protein.Pvalue.Loss	Protein.Diff.Loss	Protein.Pvalue.Gain vs Loss	Protein.Difference.Gain vs Loss	RNA.Gain.Difference.Category	RNA.Loss.Difference.Category	Protein.Gain.Difference.Category	Protein.Loss.Difference.Category
1	A2ML1	A2ML1	0.0681968	-0.159834	0.642835	-0.0494035	0.285395	-0.11043	sp.A8K2U0.A2ML1_HUMAN	0.0635033	-0.654509	0.13606	-0.509073	0.680704	-0.145436	Anti-Scaling	Buffering	Anti-Scaling	Scaling
2	AAAS	AAAS	0.186219	0.151554	0.000395076	-0.243056	0.00234902	0.39461	sp.Q9NRG9.AAAS_HUMAN	0.219329	0.0919093	0.106393	0.0945228	0.975978	-0.00261355	Buffering	Buffering	Buffering	Buffering
3	AACS	AACS	0.682164	0.0572398	0.663056	0.0453455	0.941633	0.0118943	sp.Q86V21.AACS_HUMAN	0.94938	-0.0103249	0.915076	-0.0108093	0.997841	0.000484416	Buffering	Buffering	Buffering	Buffering
4	AAGAB	AAGAB	4.24247e-05	0.505401	0.198814	-0.0854121	6.75682e-06	0.590813	sp.Q6PD74.AAGAB_HUMAN	0.0171693	0.371099	0.0103591	-0.235379	0.000415643	0.606477	Scaling	Buffering	Scaling	Buffering
5	AAK1	AAK1	0.00329143	0.322044	0.916422	-0.011355	0.0139019	0.333399	sp.Q2M2I8.AAK1_HUMAN	0.00823824	0.277235	0.264967	-0.130779	0.00450013	0.408014	Scaling	Buffering	Scaling	Buffering
6	AAMDC	AAMDC	0.325889	0.129303	0.199603	-0.155619	0.0794168	0.284922	sp.Q9H7C9.AAMDC_HUMAN	0.895078	0.0183478	0.0175939	-0.315096	0.045587	0.333444	Buffering	Buffering	Buffering	Scaling
7	AAMP	AAMP	6.48744e-06	0.355999	0.00484087	-0.209368	3.45239e-08	0.565367	sp.Q13685.AAMP_HUMAN	0.0212342	0.288259	0.0357089	-0.223498	0.000930453	0.511757	Scaling	Buffering	Scaling	Buffering
8	AAR2	AAR2	1.18634e-14	0.392627	0.54438	0.0933862	0.0632247	0.299241	sp.Q9Y312.AAR2_HUMAN	6.31791e-06	0.224072	0.956391	-0.00491451	0.0175081	0.228987	Scaling	Buffering	Buffering	Buffering
9	AARS	AARS	0.000815632	0.596019	8.50877e-05	-0.357735	1.64771e-06	0.953754	sp.P49588.SYAC_HUMAN	0.018628	0.296006	0.000386185	-0.295285	2.40493e-05	0.59129	Scaling	Scaling	Scaling	Scaling
10	AARS2	AARS2	0.0695529	0.183998	0.00147062	-0.31034	0.000204339	0.494338	sp.Q5JTZ9.SYAM_HUMAN	0.00983489	0.246016	0.0033351	-0.195591	5.09293e-05	0.441607	Buffering	Scaling	Buffering	Buffering
11	AARSD1	AARSD1	0.00048881	0.226982	0.00224408	-0.262324	1.35929e-06	0.489306	sp.Q9BTE6.3.AASD1_HUMAN	0.0078286	0.262083	0.225096	-0.131207	0.00323256	0.39329	Buffering	Scaling	Scaling	Buffering
12	AARSD1	AARSD1	0.00048881	0.226982	0.00224408	-0.262324	1.35929e-06	0.489306	sp.Q9BTE6.AASD1_HUMAN	0.00511089	0.488109	0.941651	-0.0107606	0.0148492	0.498869	Buffering	Scaling	Scaling	Buffering
13	AASDHPPT	AASDHPPT	0.000637784	0.291078	6.63568e-08	-0.431998	2.47558e-11	0.723075	sp.Q9NRN7.ADPPT_HUMAN	0.0352427	0.23279	1.46872e-05	-0.395709	1.87764e-06	0.628499	Scaling	Scaling	Buffering	Scaling
14	AASS	AASS	0.0220637	0.395757	0.430311	0.164934	0.313041	0.230823	sp.Q9UDR5.AASS_HUMAN	0.197059	0.180551	0.374507	0.146974	0.850405	0.0335763	Scaling	Anti-Scaling	Buffering	Anti-Scaling
15	AATF	AATF	0.0120737	0.266127	0.00244441	-0.282398	3.32988e-05	0.548525	sp.Q9NY61.AATF_HUMAN	0.746497	0.0283339	0.250652	-0.111976	0.243906	0.14031	Scaling	Scaling	Buffering	Buffering
16	ABAT	ABAT	0.047605	0.707753	0.0610563	-0.259198	0.00912645	0.966951	sp.P80404.GABT_HUMAN	0.449354	0.241799	0.103577	-0.262867	0.131388	0.504667	Scaling	Scaling	Buffering	Scaling
17	ABCA1	ABCA1	0.00620468	0.692409	0.0128253	-0.369409	8.08718e-05	1.06182	sp.O95477.ABCA1_HUMAN	0.551625	0.138262	0.156105	-0.207824	0.161069	0.346086	Scaling	Scaling	Buffering	Buffering
18	ABCA10	ABCA10	0.472231	0.0675318	0.473005	-0.0635553	0.259674	0.131087	sp.Q8WWZ4.ABCAA_HUMAN	0.414026	-0.10645	0.60733	0.0739544	0.283406	-0.180405	Buffering	Buffering	Anti-Scaling	Buffering
19	ABCA12	ABCA12	0.744051	-0.0560308	0.360062	0.140192	0.357229	-0.196222	sp.Q86UK0.ABCAC_HUMAN	0.920456	-0.0303456	0.257669	0.378786	0.334729	-0.409132	Buffering	Anti-Scaling	Buffering	Anti-Scaling
20	ABCA13	ABCA13	0.00791528	0.282293	0.198409	-0.113246	0.000849644	0.395539	sp.Q86UQ4.ABCAD_HUMAN	0.226922	-0.24448	0.379237	0.198079	0.0662566	-0.44256	Scaling	Buffering	Anti-Scaling	Anti-Scaling
21	ABCA2	ABCA2	0.713784	-0.06491	0.00091401	-0.458174	0.041255	0.393264	sp.Q9BZC7.3.ABCA2_HUMAN	0.467348	-0.0975415	0.220977	-0.134112	0.799889	0.0365708	Buffering	Scaling	Buffering	Buffering
22	ABCA3	ABCA3	0.260388	0.376526	0.00367547	-0.51867	0.01103	0.895196	sp.Q99758.ABCA3_HUMAN	0.865217	0.0380153	0.0259717	-0.270248	0.174885	0.308263	Scaling	Scaling	Buffering	Scaling
23	ABCB1	ABCB1	0.723926	0.0714841	0.570583	-0.139715	0.427509	0.211199	sp.P08183.MDR1_HUMAN	0.510502	-0.133279	0.754801	-0.0953655	0.90384	-0.0379138	Buffering	Buffering	Anti-Scaling	Buffering
24	ABCB10	ABCB10	1.23748e-05	0.378209	0.000182359	-0.403981	1.6987e-09	0.78219	sp.Q9NRK6.ABCBA_HUMAN	0.000175831	0.305285	0.223252	-0.108119	0.00011673	0.413404	Scaling	Scaling	Scaling	Buffering
25	ABCB4	ABCB4	0.0146238	0.285552	0.0694399	-0.188598	0.000276282	0.47415	sp.P21439.MDR3_HUMAN	0.127935	-0.404173	0.159413	-0.253945	0.554313	-0.150228	Scaling	Buffering	Anti-Scaling	Scaling
26	ABCB5	ABCB5	0.780953	0.0360308	0.64492	0.0991457	0.772588	-0.0631149	sp.Q2M3G0.4.ABCB5_HUMAN	0.750271	0.0686817	0.510322	-0.194356	0.436377	0.263037	Buffering	Buffering	Buffering	Buffering
27	ABCB6	ABCB6	0.242178	0.276103	0.753165	0.0567243	0.41815	0.219378	sp.Q9NP58.ABCB6_HUMAN	0.27345	0.215584	0.765351	-0.0379107	0.237011	0.253494	Scaling	Buffering	Buffering	Buffering
28	ABCB8	ABCB8	1.76412e-10	0.470006	0.00270495	-0.27185	4.9338e-12	0.741857	sp.Q9NUT2.ABCB8_HUMAN	1.37639e-05	0.34756	0.297705	-0.10032	3.94601e-05	0.44788	Scaling	Scaling	Scaling	Buffering
29	ABCC1	ABCC1	0.0877077	0.312542	0.00197731	-0.319756	0.00183278	0.632298	sp.P33527.MRP1_HUMAN	0.201835	0.195053	0.0283382	-0.200555	0.0161002	0.395608	Scaling	Scaling	Buffering	Buffering
30	ABCC10	ABCC10	0.000620588	0.338602	0.00276459	-0.250548	1.125e-06	0.58915	sp.Q5T3U5.MRP7_HUMAN	0.0779329	0.228421	0.966203	-0.00477329	0.130191	0.233195	Scaling	Scaling	Buffering	Buffering
31	ABCC3	ABCC3	0.0555787	0.723783	0.131172	0.550924	0.713871	0.172859	sp.O15438.4.MRP3_HUMAN	0.269044	0.230906	0.518013	0.116204	0.647285	0.114702	Scaling	Anti-Scaling	Buffering	Anti-Scaling
32	ABCC4	ABCC4	0.602192	-0.116952	0.00871289	-0.358021	0.293817	0.24107	sp.O15439.MRP4_HUMAN	0.83958	0.0336018	0.0141963	-0.238465	0.111993	0.272067	Anti-Scaling	Scaling	Buffering	Buffering
33	ABCC5	ABCC5	0.000257167	0.403077	0.00621126	-0.430055	4.33443e-06	0.833133	sp.O15440.MRP5_HUMAN	8.1953e-06	0.586077	0.56889	0.0958151	0.0140397	0.490262	Scaling	Scaling	Scaling	Buffering
34	ABCC8	ABCC8	0.970333	0.00387029	0.593836	0.0423347	0.740168	-0.0384644	sp.Q09428.2.ABCC8_HUMAN	0.526868	0.175392	0.40514	0.209807	0.913714	-0.0344148	Buffering	Buffering	Buffering	Anti-Scaling
35	ABCD3	ABCD3	0.000775474	0.368213	0.0597943	-0.176665	3.79697e-05	0.544878	sp.P28288.ABCD3_HUMAN	0.616765	0.0692651	0.0671653	-0.180188	0.115527	0.249453	Scaling	Buffering	Buffering	Buffering
36	ABCD4	ABCD4	0.0544653	0.187131	2.07208e-09	-0.418874	1.11288e-07	0.606004	sp.O14678.ABCD4_HUMAN	0.107422	0.202842	0.558294	-0.056108	0.0536876	0.25895	Buffering	Scaling	Buffering	Buffering
37	ABCE1	ABCE1	0.214224	0.249973	2.12823e-07	-0.313037	0.0121073	0.56301	sp.P61221.ABCE1_HUMAN	0.294377	0.209999	6.54313e-05	-0.264062	0.0288084	0.474061	Buffering	Scaling	Buffering	Scaling
38	ABCF1	ABCF1	0.000364591	0.336525	0.000536431	-0.312111	8.57486e-08	0.648635	sp.Q8NE71.ABCF1_HUMAN	0.000652462	0.291166	0.056022	-0.140993	2.45643e-05	0.432159	Scaling	Scaling	Scaling	Buffering
39	ABCF1	ABCF1	0.000364591	0.336525	0.000536431	-0.312111	8.57486e-08	0.648635	tr.Q5STZ8.Q5STZ8_HUMAN	0.26712	0.302636	0.346565	0.260786	0.897442	0.0418499	Scaling	Scaling	Scaling	Anti-Scaling
40	ABCF2	ABCF2	1.54633e-08	0.401507	0.00173196	-0.314276	3.29619e-10	0.715783	sp.Q9UG63.ABCF2_HUMAN	9.90085e-06	0.30187	0.00758139	-0.214735	3.38796e-08	0.516605	Scaling	Scaling	Scaling	Buffering
41	ABCF3	ABCF3	4.60435e-07	0.284442	5.50654e-05	-0.377468	1.00668e-09	0.66191	sp.Q9NUQ8.ABCF3_HUMAN	0.608783	0.0378854	0.0680495	-0.192481	0.0482047	0.230366	Scaling	Scaling	Buffering	Buffering
42	ABHD10	ABHD10	0.110588	0.143926	0.0192614	-0.247121	0.00184015	0.391047	sp.Q9NUJ1.ABHDA_HUMAN	2.12138e-05	0.346658	0.253707	-0.115664	9.64572e-05	0.462323	Buffering	Buffering	Scaling	Buffering
43	ABHD11	ABHD11	0.0559338	0.214764	0.0350059	-0.313017	0.000562894	0.527781	sp.Q8NFV4.ABHDB_HUMAN	0.136222	0.152689	0.130534	-0.206159	0.0127649	0.358848	Buffering	Scaling	Buffering	Buffering
44	ABHD12	ABHD12	8.73188e-11	0.614333	0.000320435	-0.371233	8.12143e-16	0.985566	sp.Q8N2K0.ABD12_HUMAN	2.0537e-06	0.391353	0.00128541	-0.26218	1.77706e-11	0.653532	Scaling	Scaling	Scaling	Scaling
45	ABHD13	ABHD13	1.6349e-05	0.485616	5.15247e-11	-0.371999	5.94778e-11	0.857615	sp.Q7L211.ABHDD_HUMAN	0.0843035	0.290882	0.0118336	-0.2651	0.0018561	0.555982	Scaling	Scaling	Scaling	Scaling
46	ABHD14B	ABHD14B	0.175413	-0.362508	1.31143e-13	-0.679906	0.234146	0.317398	sp.Q96IU4.ABHEB_HUMAN	0.580218	-0.210791	7.26151e-10	-0.65567	0.252569	0.444879	Anti-Scaling	Scaling	Anti-Scaling	Scaling
47	ABHD16A	ABHD16A	0.000846428	0.332657	2.39359e-05	-0.358721	3.42898e-08	0.691377	sp.O95870.ABHGA_HUMAN	0.0325873	0.230891	0.254137	-0.0990027	0.00957094	0.329894	Scaling	Scaling	Buffering	Buffering
48	ABHD17A	ABHD17A	0.0706095	0.268883	1.31138e-07	-0.304224	0.000563653	0.573107	sp.Q96GS6.2.AB17A_HUMAN	0.56406	0.128197	0.666686	-0.0340811	0.472064	0.162278	Scaling	Scaling	Buffering	Buffering
49	ABHD17B	ABHD17B	0.511554	0.0583859	1.09019e-09	-0.503527	3.07612e-07	0.561913	sp.Q5VST6.2.AB17B_HUMAN	0.653365	0.0451422	0.000562738	-0.299532	0.00313506	0.344674	Buffering	Scaling	Buffering	Scaling
50	ABHD17C	ABHD17C	0.000344806	0.894422	0.285642	0.14234	0.00228517	0.752082	sp.Q6PCB6.AB17C_HUMAN	0.116398	0.860016	0.916996	-0.019925	0.113592	0.879941	Scaling	Anti-Scaling	Scaling	Buffering
51	ABHD4	ABHD4	0.00304164	0.594601	0.228794	-0.156984	0.000554642	0.751585	sp.Q8TB40.ABHD4_HUMAN	0.0224518	0.327975	0.768574	-0.0292928	0.0210493	0.357267	Scaling	Buffering	Scaling	Buffering
52	ABHD5	ABHD5	0.101174	0.378022	0.00122803	-0.260926	0.00944207	0.638948	sp.Q8WTS1.ABHD5_HUMAN	0.0469356	-0.461326	0.430951	-0.0710108	0.090914	-0.390315	Scaling	Scaling	Anti-Scaling	Buffering
53	ABHD6	ABHD6	0.227988	0.286028	1.99191e-07	-0.507111	0.00298716	0.793138	sp.Q9BV23.ABHD6_HUMAN	0.742712	0.0875576	0.00249624	-0.302556	0.160153	0.390114	Scaling	Scaling	Buffering	Scaling
54	ABI1	ABI1	0.00214791	0.344534	2.57118e-09	-0.356835	6.62018e-08	0.701369	sp.Q8IZP0.9.ABI1_HUMAN	0.542638	-0.0489627	0.000111322	-0.226636	0.0411074	0.177673	Scaling	Scaling	Buffering	Buffering
55	ABI2	ABI2	5.34117e-05	0.522929	0.717737	-0.0359444	9.90261e-05	0.558873	sp.Q9NYB9.2.ABI2_HUMAN	0.00164201	0.429979	0.404437	-0.0770983	0.000714959	0.507077	Scaling	Buffering	Scaling	Buffering
56	ABI3	ABI3	0.801158	-0.0294543	0.382225	0.157762	0.352546	-0.187216	sp.Q9P2A4.ABI3_HUMAN	0.943309	0.0724023	0.29301	0.656866	0.608517	-0.584464	Buffering	Anti-Scaling	Buffering	Anti-Scaling
57	ABI3BP	ABI3BP	0.992593	-0.00174761	0.797056	0.0667025	0.81291	-0.0684501	tr.D3YTG3.D3YTG3_HUMAN	0.915254	-0.118157	0.405882	0.271542	0.731971	-0.389699	Buffering	Buffering	Anti-Scaling	Anti-Scaling
58	ABL1	ABL1	0.0493371	0.254702	3.72906e-07	-0.434704	2.85597e-06	0.689406	sp.P00519.2.ABL1_HUMAN	0.142664	0.130693	0.10243	-0.127282	0.0102987	0.257974	Scaling	Scaling	Buffering	Buffering
59	ABL2	ABL2	0.870925	-0.0227857	0.334177	0.186017	0.330081	-0.208803	sp.P42684.ABL2_HUMAN	0.103259	0.143403	0.00107953	-0.370619	0.000123564	0.514022	Buffering	Anti-Scaling	Buffering	Scaling
60	ABLIM1	ABLIM1	0.194414	0.576875	0.00380585	-0.609666	0.0133563	1.18654	tr.Q5T6N4.Q5T6N4_HUMAN	0.285883	0.327541	0.00626354	-0.380219	0.0304305	0.70776	Scaling	Scaling	Scaling	Scaling
61	ABLIM2	ABLIM2	0.12179	-0.376931	0.817602	0.023635	0.10074	-0.400566	sp.Q6H8Q1.9.ABLM2_HUMAN	0.175556	-0.456823	0.127822	0.256922	0.0404781	-0.713745	Anti-Scaling	Buffering	Anti-Scaling	Anti-Scaling
62	ABLIM3	ABLIM3	0.046405	0.772698	0.462897	0.166341	0.140402	0.606357	sp.O94929.3.ABLM3_HUMAN	0.018672	0.705974	0.731228	0.066948	0.0504164	0.639026	Scaling	Anti-Scaling	Scaling	Buffering
63	ABR	ABR	0.0227281	0.370329	0.00184543	-0.384192	1.10174e-05	0.754521	sp.Q12979.ABR_HUMAN	0.22589	0.215117	0.00662672	-0.265081	0.0110195	0.480198	Scaling	Scaling	Buffering	Scaling
64	ABRACL	ABRACL	0.964865	-0.0181029	7.2124e-05	-0.460634	0.291379	0.442531	sp.Q9P1F3.ABRAL_HUMAN	0.938601	-0.0346235	0.000761763	-0.493611	0.316364	0.458988	Buffering	Scaling	Buffering	Scaling
65	ABT1	ABT1	0.00585047	0.24188	4.66295e-09	-0.419516	2.20413e-09	0.661396	sp.Q9ULW3.ABT1_HUMAN	0.595995	0.0453661	0.204978	-0.0962701	0.175929	0.141636	Buffering	Scaling	Buffering	Buffering
66	ABTB2	ABTB2	0.36119	0.153563	0.864913	0.0222551	0.481629	0.131308	sp.Q8N961.ABTB2_HUMAN	0.414035	0.152183	0.236017	-0.177099	0.11129	0.329282	Buffering	Buffering	Buffering	Buffering
67	ACAA1	ACAA1	0.289057	0.245528	2.35566e-05	-0.343089	0.0197947	0.588617	sp.P09110.THIK_HUMAN	0.664871	-0.101059	0.767485	-0.0240683	0.743594	-0.0769908	Buffering	Scaling	Anti-Scaling	Buffering
68	ACAA2	ACAA2	0.0395718	0.606011	9.23531e-06	-0.691772	9.59257e-05	1.29778	sp.P42765.THIM_HUMAN	0.40463	0.264702	0.0230725	-0.298655	0.083173	0.563357	Scaling	Scaling	Scaling	Scaling
69	ACACA	ACACA	0.100189	0.180547	0.0215013	-0.21998	0.0028538	0.400527	sp.Q13085.4.ACACA_HUMAN	0.337724	0.092355	0.0160301	-0.236292	0.00954417	0.328647	Buffering	Buffering	Buffering	Buffering
70	ACACB	ACACB	0.286464	0.21134	0.0584039	-0.237118	0.0436561	0.448458	sp.O00763.ACACB_HUMAN	0.656771	0.0642343	0.205322	-0.124298	0.254524	0.188532	Buffering	Buffering	Buffering	Buffering
71	ACAD10	ACAD10	0.0418188	0.235495	0.00143822	-0.284832	0.00021568	0.520327	sp.Q6JQN1.5.ACD10_HUMAN	0.151402	0.164395	0.358285	-0.0854072	0.0654929	0.249803	Buffering	Scaling	Buffering	Buffering
72	ACAD11	ACAD11	0.539015	0.0608508	0.00617804	-0.385918	0.00508361	0.446769	sp.Q709F0.ACD11_HUMAN	0.631467	0.0527525	0.397378	-0.108612	0.277598	0.161365	Buffering	Scaling	Buffering	Buffering
73	ACAD8	ACAD8	0.000496186	0.366959	1.52884e-09	-0.552821	1.30762e-12	0.91978	sp.Q9UKU7.ACAD8_HUMAN	0.0120814	0.254652	0.00705018	-0.232926	2.86592e-05	0.487578	Scaling	Scaling	Scaling	Buffering
74	ACAD9	ACAD9	4.90169e-05	0.279033	0.000272851	-0.330585	2.39904e-08	0.609618	sp.Q9H845.ACAD9_HUMAN	6.5439e-09	0.422664	0.161941	-0.116042	1.74046e-07	0.538707	Scaling	Scaling	Scaling	Buffering
75	ACADM	ACADM	0.000702973	0.459293	1.21263e-07	-0.562787	8.03922e-10	1.02208	sp.P11310.2.ACADM_HUMAN	0.00144144	0.480526	0.00196064	-0.285083	7.1583e-06	0.765608	Scaling	Scaling	Scaling	Scaling
76	ACADS	ACADS	0.0020614	0.578787	0.0444695	-0.292354	0.00010537	0.871141	sp.P16219.ACADS_HUMAN	0.00203926	0.619024	0.620264	-0.0741903	0.00246551	0.693215	Scaling	Scaling	Scaling	Buffering
77	ACADSB	ACADSB	0.0961547	0.303856	0.000460819	-0.318332	0.00202158	0.622187	sp.P45954.ACDSB_HUMAN	0.300108	0.194002	0.000381651	-0.330274	0.00996519	0.524276	Scaling	Scaling	Buffering	Scaling
78	ACADVL	ACADVL	0.0143458	0.308903	4.0538e-11	-0.502373	3.68525e-08	0.811277	sp.P49748.3.ACADV_HUMAN	0.0207476	0.343703	0.00793877	-0.235208	0.000272758	0.578911	Scaling	Scaling	Scaling	Buffering
79	ACAP1	ACAP1	0.750032	-0.077598	0.0615104	-0.305442	0.372668	0.227844	sp.Q15027.ACAP1_HUMAN	0.915308	-0.0567512	0.431369	0.144113	0.712258	-0.200864	Buffering	Scaling	Buffering	Anti-Scaling
80	ACAP2	ACAP2	0.00129752	0.253881	0.00318959	-0.341722	6.38367e-06	0.595603	sp.Q15057.ACAP2_HUMAN	0.56291	0.0528828	0.00830496	-0.329526	0.00668247	0.382409	Scaling	Scaling	Buffering	Scaling
81	ACAP3	ACAP3	0.407044	0.15101	0.552434	-0.0619944	0.275406	0.213005	sp.Q96P50.ACAP3_HUMAN	0.0221363	-0.380038	0.395572	0.113105	0.0106591	-0.493143	Buffering	Buffering	Anti-Scaling	Anti-Scaling
82	ACAT1	ACAT1	0.611408	0.0579856	2.29385e-10	-0.697699	2.67594e-07	0.755684	sp.P24752.THIL_HUMAN	0.0183701	0.218343	8.52499e-06	-0.394478	1.24772e-07	0.612821	Buffering	Scaling	Buffering	Scaling
83	ACAT2	ACAT2	0.0788879	0.34112	0.00116226	-0.375207	0.000765222	0.716327	sp.Q9BWD1.THIC_HUMAN	0.310465	0.15782	0.000203536	-0.345583	0.00268783	0.503404	Scaling	Scaling	Buffering	Scaling
84	ACBD3	ACBD3	4.06944e-07	0.286745	0.0320101	-0.203042	5.86959e-06	0.489787	sp.Q9H3P7.GCP60_HUMAN	0.0218742	0.12541	0.325931	-0.0816723	0.0239037	0.207083	Scaling	Buffering	Buffering	Buffering
85	ACBD4	ACBD4	0.221867	0.15812	0.0394444	-0.225769	0.0132377	0.383889	sp.Q8NC06.2.ACBD4_HUMAN	0.743251	0.0959929	0.0609043	-0.59543	0.0859422	0.691423	Buffering	Buffering	Buffering	Scaling
86	ACBD5	ACBD5	0.0127803	0.371459	9.66544e-10	-0.474814	6.35194e-07	0.846273	sp.Q5T8D3.ACBD5_HUMAN	0.0390614	0.307612	1.32327e-05	-0.353065	4.78521e-05	0.660678	Scaling	Scaling	Scaling	Scaling
87	ACBD6	ACBD6	3.72794e-08	0.310813	1.53845e-06	-0.542698	3.62721e-11	0.853511	sp.Q9BR61.ACBD6_HUMAN	0.018969	0.219129	0.00807088	-0.303728	0.000158099	0.522857	Scaling	Scaling	Buffering	Scaling
88	ACBD7	ACBD7	0.132021	0.289464	0.00211422	-0.352207	0.00151375	0.64167	sp.Q8N6N7.ACBD7_HUMAN	0.219656	0.398223	0.00256328	-0.542837	0.00804821	0.94106	Scaling	Scaling	Scaling	Scaling
89	ACD	ACD	3.80438e-06	0.570162	2.27369e-09	-0.501106	1.21445e-12	1.07127	sp.Q96AP0.ACD_HUMAN	0.0572462	0.189593	0.305782	-0.0813571	0.0147006	0.27095	Scaling	Scaling	Buffering	Buffering
90	ACE	ACE	0.328313	-0.158663	0.020917	-0.326136	0.372597	0.167473	sp.P12821.ACE_HUMAN	0.495784	-0.160253	0.0969899	-0.421081	0.387392	0.260828	Anti-Scaling	Scaling	Anti-Scaling	Scaling
91	ACIN1	ACIN1	0.258492	0.112564	7.62927e-09	-0.404431	9.15659e-06	0.516995	tr.E7EQT4.E7EQT4_HUMAN	0.0592021	-0.171895	2.96329e-06	-0.339336	0.0942205	0.167441	Buffering	Scaling	Anti-Scaling	Scaling
92	ACIN1	ACIN1	0.258492	0.112564	7.62927e-09	-0.404431	9.15659e-06	0.516995	sp.Q9UKV3.5.ACINU_HUMAN	0.378378	-0.0637924	4.51049e-05	-0.248825	0.0256233	0.185033	Buffering	Scaling	Buffering	Buffering
93	ACLY	ACLY	0.0033794	0.297752	0.123948	-0.155047	0.000464831	0.452799	sp.P53396.ACLY_HUMAN	0.122566	0.146574	0.031932	-0.249765	0.00434838	0.396339	Scaling	Buffering	Buffering	Buffering
94	ACLY	ACLY	0.0033794	0.297752	0.123948	-0.155047	0.000464831	0.452799	sp.P53396.2.ACLY_HUMAN	0.546969	0.10619	0.286065	-0.195692	0.197762	0.301881	Scaling	Buffering	Buffering	Buffering
95	ACO1	ACO1	0.201563	0.220604	0.507774	-0.0701899	0.0954503	0.290793	sp.P21399.ACOC_HUMAN	0.857873	0.0266126	0.536737	-0.0580403	0.575767	0.0846529	Buffering	Buffering	Buffering	Buffering
96	ACO2	ACO2	0.000913486	0.522326	2.7181e-13	-0.460214	1.99826e-07	0.98254	sp.Q99798.ACON_HUMAN	0.0117048	0.399632	3.06435e-07	-0.315002	5.84183e-05	0.714634	Scaling	Scaling	Scaling	Scaling
97	ACOT1	ACOT1	1.40898e-06	0.807783	0.0450295	-0.257927	1.04788e-08	1.06571	sp.Q86TX2.ACOT1_HUMAN	0.0190917	0.627503	0.508612	-0.179071	0.011986	0.806574	Scaling	Scaling	Scaling	Buffering
98	ACOT11	ACOT11	0.00816811	0.685297	0.882261	-0.0244168	0.0115036	0.709714	sp.Q8WXI4.2.ACO11_HUMAN	0.5473	0.113285	0.829876	-0.033406	0.498891	0.146691	Scaling	Buffering	Buffering	Buffering
99	ACOT13	ACOT13	0.0717607	0.275716	0.00238915	-0.329624	0.000752427	0.605341	sp.Q9NPJ3.ACO13_HUMAN	0.249736	0.169183	8.27823e-05	-0.413441	0.000689197	0.582625	Scaling	Scaling	Buffering	Scaling
100	ACOT2	ACOT2	9.17268e-05	0.71087	0.0062767	-0.41681	3.6181e-08	1.12768	sp.P49753.ACOT2_HUMAN	4.81733e-07	0.725016	0.0240718	-0.241649	7.15677e-10	0.966666	Scaling	Scaling	Scaling	Buffering
101	ACOT4	ACOT4	0.00521095	0.529011	0.00036359	-0.350127	1.282e-05	0.879138	sp.Q8N9L9.ACOT4_HUMAN	0.339254	0.285707	0.0157001	-0.59116	0.00524189	0.876868	Scaling	Scaling	Scaling	Scaling
102	ACOT7	ACOT7	0.0029901	0.545369	0.0270063	-0.240798	9.45186e-05	0.786167	sp.O00154.BACH_HUMAN	0.283135	0.1842	0.0208295	-0.231866	0.0262051	0.416065	Scaling	Buffering	Buffering	Buffering
103	ACOT8	ACOT8	1.08898e-14	0.467535	0.148471	-0.21231	9.10335e-05	0.679845	sp.O14734.ACOT8_HUMAN	6.1443e-07	0.347752	0.0326283	-0.404283	0.000375238	0.752035	Scaling	Buffering	Scaling	Scaling
104	ACOX1	ACOX1	0.00215702	0.278198	0.325517	-0.115875	0.00429095	0.394073	sp.Q15067.2.ACOX1_HUMAN	0.264271	0.12836	0.478229	-0.0948754	0.173075	0.223236	Scaling	Buffering	Buffering	Buffering
105	ACOX3	ACOX3	0.0439088	0.421111	3.3365e-07	-0.34609	0.000996873	0.767202	sp.O15254.ACOX3_HUMAN	0.00421324	0.69717	0.046995	-0.183434	0.000598907	0.880604	Scaling	Scaling	Scaling	Buffering
106	ACP1	ACP1	0.00126072	0.253928	8.03629e-08	-0.467395	1.65888e-10	0.721323	sp.P24666.PPAC_HUMAN	0.169763	0.187079	0.000564652	-0.442582	0.000231855	0.62966	Scaling	Scaling	Buffering	Scaling
107	ACP1	ACP1	0.00126072	0.253928	8.03629e-08	-0.467395	1.65888e-10	0.721323	sp.P24666.2.PPAC_HUMAN	0.518532	-0.135726	0.219988	-0.365039	0.469774	0.229313	Scaling	Scaling	Anti-Scaling	Scaling
108	ACP2	ACP2	0.00136203	0.398226	0.790918	0.0237238	0.00459818	0.374502	sp.P11117.PPAL_HUMAN	0.00294087	0.297785	0.246787	0.0999608	0.0728386	0.197824	Scaling	Buffering	Scaling	Buffering
109	ACP5	ACP5	0.716197	-0.166859	0.513286	-0.129811	0.936033	-0.0370478	sp.P13686.PPA5_HUMAN	0.344469	-0.386852	0.381416	0.197803	0.165425	-0.584655	Anti-Scaling	Buffering	Anti-Scaling	Anti-Scaling
110	ACP6	ACP6	0.487339	-0.093127	0.0442991	-0.36768	0.162489	0.274553	sp.Q9NPH0.PPA6_HUMAN	0.888782	0.01725	0.910841	0.0176032	0.99837	-0.000353167	Buffering	Scaling	Buffering	Buffering
111	ACPP	ACPP	0.82167	0.0332002	0.0155543	-0.399558	0.020329	0.432758	sp.P15309.2.PPAP_HUMAN	0.473071	0.178177	0.0909998	-0.60057	0.0483885	0.778747	Buffering	Scaling	Buffering	Scaling
112	ACSF2	ACSF2	0.549222	0.107103	0.564125	0.109425	0.992126	-0.00232202	sp.Q96CM8.ACSF2_HUMAN	0.47305	-0.102621	0.990275	0.00186313	0.58259	-0.104484	Buffering	Anti-Scaling	Anti-Scaling	Buffering
113	ACSF3	ACSF3	0.0636462	0.202645	2.20109e-07	-0.423767	1.33475e-06	0.626412	sp.Q4G176.ACSF3_HUMAN	0.620819	0.0563997	0.0102123	-0.180289	0.0540912	0.236689	Buffering	Scaling	Buffering	Buffering
114	ACSL1	ACSL1	0.821914	-0.0961494	0.352153	-0.128946	0.939022	0.0327965	sp.P33121.ACSL1_HUMAN	0.641981	0.181132	0.0431217	-0.202533	0.332389	0.383666	Buffering	Buffering	Buffering	Buffering
115	ACSL3	ACSL3	0.172158	0.194861	0.92394	0.0107391	0.262099	0.184122	sp.O95573.ACSL3_HUMAN	0.100918	0.230194	0.358139	0.0845438	0.339087	0.145651	Buffering	Buffering	Buffering	Buffering
116	ACSL5	ACSL5	0.729933	0.176296	0.113384	-0.388702	0.28617	0.564998	sp.Q9ULC5.3.ACSL5_HUMAN	0.331427	-0.256624	0.144841	-0.207898	0.85474	-0.0487257	Buffering	Scaling	Anti-Scaling	Buffering
117	ACSL6	ACSL6	0.360759	0.136483	0.21332	-0.0797411	0.149754	0.216224	sp.Q9UKU0.9.ACSL6_HUMAN	0.902385	-0.0281594	0.679418	-0.0709679	0.871533	0.0428084	Buffering	Buffering	Buffering	Buffering
118	ACSM3	ACSM3	0.0615338	0.597993	0.28353	-0.198305	0.0198801	0.796299	sp.Q53FZ2.ACSM3_HUMAN	0.123794	0.380215	0.982873	0.00382045	0.161488	0.376395	Scaling	Buffering	Scaling	Buffering
119	ACSS1	ACSS1	0.584145	0.114878	0.00153866	-0.646147	0.00117395	0.761025	sp.Q9NUB1.ACS2L_HUMAN	0.928761	0.0145178	0.00648566	-0.398821	0.023894	0.413338	Buffering	Scaling	Buffering	Scaling
120	ACSS2	ACSS2	0.000617995	0.385763	0.633341	-0.123812	0.0595715	0.509575	sp.Q9NR19.2.ACSA_HUMAN	0.174303	0.124827	0.124204	-0.30818	0.0362993	0.433006	Scaling	Buffering	Buffering	Scaling
121	ACSS3	ACSS3	0.0195578	0.677328	0.329137	-0.151781	0.00771789	0.829109	sp.Q9H6R3.ACSS3_HUMAN	0.0527164	0.930525	0.129355	0.363527	0.259891	0.566998	Scaling	Buffering	Scaling	Anti-Scaling
122	ACTA2	ACTA2	0.249824	0.735118	0.0425857	-0.411208	0.0813964	1.14633	sp.P62736.ACTA_HUMAN	0.91397	0.010469	0.837119	0.00926676	0.990367	0.00120225	Scaling	Scaling	Buffering	Buffering
123	ACTB	ACTB	0.154166	0.114628	0.0582472	-0.2749	0.00995648	0.389528	sp.P60709.ACTB_HUMAN	0.00317718	0.128564	0.243429	0.0824371	0.51624	0.0461268	Buffering	Scaling	Buffering	Buffering
124	ACTBL2	ACTBL2	0.419308	0.121002	0.474666	0.0591562	0.698582	0.0618462	sp.Q562R1.ACTBL_HUMAN	0.697437	-0.0525429	0.76926	0.023445	0.584391	-0.0759879	Buffering	Buffering	Buffering	Buffering
125	ACTG1	ACTG1	0.111034	0.173854	0.202611	-0.166098	0.0274013	0.339951	tr.K7EM38.K7EM38_HUMAN	0.0648453	-0.342227	0.376242	-0.155839	0.425683	-0.186388	Buffering	Buffering	Anti-Scaling	Buffering
126	ACTL6A	ACTL6A	1.68573e-06	0.334259	0.000170565	-0.372421	1.62832e-09	0.70668	sp.O96019.ACL6A_HUMAN	2.12321e-05	0.248797	0.0058041	-0.171742	5.55173e-08	0.420539	Scaling	Scaling	Buffering	Buffering
127	ACTL8	ACTL8	0.759693	-0.0885051	0.322982	0.188995	0.395554	-0.2775	sp.Q9H568.ACTL8_HUMAN	0.408833	-0.1654	0.475235	0.120804	0.222842	-0.286205	Buffering	Anti-Scaling	Anti-Scaling	Anti-Scaling
128	ACTN1	ACTN1	0.0077939	0.603806	0.527059	0.0983833	0.0311058	0.505422	sp.P12814.4.ACTN1_HUMAN	0.00930106	0.376838	0.410476	0.0853534	0.0633204	0.291485	Scaling	Buffering	Scaling	Buffering
129	ACTN1	ACTN1	0.0077939	0.603806	0.527059	0.0983833	0.0311058	0.505422	sp.P12814.ACTN1_HUMAN	0.0265153	0.423856	0.325623	0.116324	0.119109	0.307533	Scaling	Buffering	Scaling	Anti-Scaling
130	ACTN2	ACTN2	0.44719	0.0987763	0.601855	-0.0702566	0.309327	0.169033	sp.P35609.ACTN2_HUMAN	0.554934	0.146023	0.089503	0.398789	0.410479	-0.252766	Buffering	Buffering	Buffering	Anti-Scaling
131	ACTN3	ACTN3	0.202598	-0.0578403	0.593253	-0.0323588	0.597196	-0.0254815	sp.Q08043.ACTN3_HUMAN	0.766067	-0.0972634	0.28514	-0.310792	0.479996	0.213529	Buffering	Buffering	Buffering	Scaling
132	ACTN4	ACTN4	0.000646925	0.445258	0.79542	-0.0321433	0.00209835	0.477401	tr.H7C144.H7C144_HUMAN	0.33211	0.352677	0.316273	-0.288907	0.104442	0.641583	Scaling	Buffering	Scaling	Scaling
133	ACTN4	ACTN4	0.000646925	0.445258	0.79542	-0.0321433	0.00209835	0.477401	sp.O43707.ACTN4_HUMAN	0.00393116	0.356764	0.990771	-0.00126359	0.0143785	0.358027	Scaling	Buffering	Scaling	Buffering
134	ACTR10	ACTR10	2.03049e-05	0.395168	0.00352078	-0.205494	1.7873e-08	0.600661	sp.Q9NZ32.ARP10_HUMAN	0.807192	-0.019257	0.0372222	0.117171	0.110968	-0.136428	Scaling	Buffering	Buffering	Anti-Scaling
135	ACTR1A	ACTR1A	0.00516398	0.47636	2.20864e-07	-0.365028	1.6717e-05	0.841388	sp.P61163.ACTZ_HUMAN	0.0967141	0.210973	0.00221906	-0.173307	0.00506145	0.38428	Scaling	Scaling	Buffering	Buffering
136	ACTR1B	ACTR1B	0.358128	0.080349	0.359642	-0.0746058	0.158589	0.154955	sp.P42025.ACTY_HUMAN	0.691952	0.0486526	0.128961	-0.170978	0.152708	0.219631	Buffering	Buffering	Buffering	Buffering
137	ACTR2	ACTR2	0.0884885	0.145684	0.00612996	-0.236669	0.000659648	0.382353	sp.P61160.ARP2_HUMAN	0.442403	-0.0539812	0.263519	-0.0832162	0.745911	0.029235	Buffering	Buffering	Buffering	Buffering
138	ACTR3	ACTR3	0.00148504	0.342011	0.142724	-0.141093	0.000224432	0.483104	sp.P61158.ARP3_HUMAN	0.00172375	0.203658	0.171631	-0.0889105	0.000279755	0.292568	Scaling	Buffering	Buffering	Buffering
139	ACTR3B	ACTR3B	1.07891e-07	0.436742	7.67074e-05	-0.435334	4.68448e-12	0.872076	sp.Q9P1U1.ARP3B_HUMAN	0.186906	0.0719684	0.155037	-0.0946151	0.0262219	0.166583	Scaling	Scaling	Buffering	Buffering
140	ACTR5	ACTR5	5.16119e-09	0.321168	0.0474648	-0.274675	0.000159338	0.595844	sp.Q9H9F9.ARP5_HUMAN	0.0500282	0.0843825	0.877259	-0.0145823	0.298803	0.0989648	Scaling	Scaling	Buffering	Buffering
141	ACTR6	ACTR6	0.0353555	0.238967	0.000391846	-0.31834	6.05364e-05	0.557307	sp.Q9GZN1.ARP6_HUMAN	0.171908	0.0950437	0.700305	0.0238833	0.404878	0.0711603	Buffering	Scaling	Buffering	Buffering
142	ACTR8	ACTR8	0.347054	0.134569	6.45718e-21	-0.540365	0.000154841	0.674934	sp.Q9H981.ARP8_HUMAN	0.233208	0.082625	0.00312686	-0.111869	0.00963241	0.194495	Buffering	Scaling	Buffering	Buffering
143	ACVR1	ACVR1	5.12072e-06	0.823612	0.901221	-0.0164718	2.72579e-05	0.840084	sp.Q04771.ACVR1_HUMAN	2.25701e-05	0.737007	0.992722	0.00112575	0.00010383	0.735881	Scaling	Buffering	Scaling	Buffering
144	ACVR1B	ACVR1B	0.0753571	0.25729	0.0126629	-0.254388	0.00248665	0.511678	sp.P36896.4.ACV1B_HUMAN	0.625179	0.103591	0.29251	0.164924	0.798241	-0.061333	Scaling	Scaling	Buffering	Anti-Scaling
145	ACVR2A	ACVR2A	0.0137302	0.286891	0.7975	-0.0237503	0.0204201	0.310641	sp.P27037.AVR2A_HUMAN	0.686112	0.171994	0.0649247	0.569277	0.425736	-0.397284	Scaling	Buffering	Buffering	Anti-Scaling
146	ACY1	ACY1	0.691129	0.0569853	8.93688e-07	-0.431187	0.00244823	0.488172	sp.Q03154.ACY1_HUMAN	0.463134	0.143131	2.99336e-07	-0.492195	0.00372087	0.635326	Buffering	Scaling	Buffering	Scaling
147	ACY3	ACY3	0.823374	-0.0315884	0.0926298	-0.17762	0.327725	0.146031	sp.Q96HD9.ACY3_HUMAN	0.871245	-0.0712224	0.00943728	-0.769966	0.125774	0.698744	Buffering	Buffering	Buffering	Scaling
148	ACYP1	ACYP1	0.788311	0.0360854	0.00426353	-0.234968	0.0627123	0.271054	sp.P07311.ACYP1_HUMAN	0.413902	-0.139294	0.0270476	-0.263951	0.492792	0.124656	Buffering	Buffering	Anti-Scaling	Scaling
149	ACYP2	ACYP2	0.01601	0.233242	0.481936	-0.072147	0.0192061	0.305389	sp.P14621.ACYP2_HUMAN	0.724095	-0.0448839	0.370754	-0.113007	0.677741	0.0681231	Buffering	Buffering	Buffering	Buffering
150	ADA	ADA	0.0737629	0.255818	0.0184078	-0.678777	0.00196435	0.934595	sp.P00813.ADA_HUMAN	0.411912	0.0955526	0.160699	-0.28438	0.0637535	0.379933	Scaling	Scaling	Buffering	Scaling
151	ADAL	ADAL	0.530085	0.0882875	0.00117648	-0.277841	0.0165666	0.366128	sp.Q6DHV7.ADAL_HUMAN	0.404353	0.142869	0.0221723	-0.211727	0.0493442	0.354596	Buffering	Scaling	Buffering	Buffering
152	ADAM10	ADAM10	0.00481318	0.406988	0.0191932	-0.226338	0.000101476	0.633326	sp.O14672.ADA10_HUMAN	0.00169689	0.413205	0.832797	0.0161819	0.00363056	0.397023	Scaling	Buffering	Scaling	Buffering
153	ADAM15	ADAM15	0.0518808	0.266783	0.494934	-0.108362	0.0505724	0.375144	sp.Q13444.5.ADA15_HUMAN	0.265968	0.11313	0.58933	-0.0628846	0.194512	0.176015	Scaling	Buffering	Buffering	Buffering
154	ADAM17	ADAM17	0.00167003	0.318784	0.0199805	-0.243	4.7296e-05	0.561784	sp.P78536.ADA17_HUMAN	0.0359198	0.178584	0.957769	-0.00498777	0.108291	0.183572	Scaling	Buffering	Buffering	Buffering
155	ADAM22	ADAM22	0.844156	0.0235919	0.0129117	-0.337255	0.0138105	0.360847	sp.Q9P0K1.ADA22_HUMAN	0.491606	-0.164291	0.843597	-0.0661789	0.789954	-0.0981121	Buffering	Scaling	Anti-Scaling	Buffering
156	ADAM28	ADAM28	0.0339222	0.675996	0.314199	0.135828	0.0876921	0.540168	sp.Q9UKQ2.ADA28_HUMAN	0.32661	-0.725669	0.356155	-0.34723	0.588614	-0.37844	Scaling	Anti-Scaling	Anti-Scaling	Scaling
157	ADAM8	ADAM8	0.240928	-0.318123	0.532736	-0.117724	0.493926	-0.2004	sp.P78325.ADAM8_HUMAN	0.400813	-0.427792	0.664256	-0.14205	0.597126	-0.285742	Anti-Scaling	Buffering	Anti-Scaling	Buffering
158	ADAM9	ADAM9	0.528511	-0.200419	0.914079	-0.014921	0.551642	-0.185498	sp.Q13443.ADAM9_HUMAN	0.445681	-0.189439	0.322323	0.115257	0.211601	-0.304696	Anti-Scaling	Buffering	Anti-Scaling	Anti-Scaling
159	ADAMTS1	ADAMTS1	0.0131116	1.11768	0.612352	-0.120851	0.00779639	1.23853	sp.Q9UHI8.ATS1_HUMAN	0.609686	0.195374	0.208333	-0.29678	0.210755	0.492154	Scaling	Buffering	Buffering	Scaling
160	ADAMTSL1	ADAMTSL1	0.177317	0.4012	0.731549	-0.0524392	0.121616	0.45364	sp.Q8N6G6.ATL1_HUMAN	0.274283	-0.430631	0.856358	-0.0585867	0.32936	-0.372044	Scaling	Buffering	Anti-Scaling	Buffering
161	ADAMTSL4	ADAMTSL4	0.224856	0.257989	0.258741	0.395202	0.717556	-0.137213	sp.Q6UY14.ATL4_HUMAN	0.266192	0.325884	0.365937	0.495532	0.770049	-0.169648	Scaling	Anti-Scaling	Scaling	Anti-Scaling
162	ADAP1	ADAP1	0.359428	0.208727	1.34554e-05	-1.2465	2.65871e-06	1.45522	sp.O75689.ADAP1_HUMAN	0.968568	-0.00650035	8.89976e-05	-0.688056	0.00026698	0.681556	Buffering	Scaling	Buffering	Scaling
163	ADAR	ADAR	0.000118367	0.287818	0.000360307	-0.447052	2.84931e-07	0.73487	sp.P55265.4.DSRAD_HUMAN	0.012335	0.157396	0.0315869	-0.210751	0.000856076	0.368147	Scaling	Scaling	Buffering	Buffering
164	ADARB1	ADARB1	0.160373	0.315851	0.00146195	-0.386663	0.00402895	0.702514	sp.P78563.RED1_HUMAN	0.571284	-0.0997185	0.000189123	-0.340182	0.186796	0.240463	Scaling	Scaling	Buffering	Scaling
165	ADAT1	ADAT1	3.27412e-05	0.604599	1.04381e-07	-0.441139	7.38536e-10	1.04574	sp.Q9BUB4.ADAT1_HUMAN	0.0014762	0.423228	0.0215096	-0.19278	2.04774e-05	0.616008	Scaling	Scaling	Scaling	Buffering
166	ADAT2	ADAT2	0.314909	0.179677	1.30705e-14	-0.620383	0.000114739	0.800059	sp.Q7Z6V5.ADAT2_HUMAN	0.602121	0.148002	0.000205047	-0.519058	0.0296195	0.66706	Buffering	Scaling	Buffering	Scaling
167	ADAT3	ADAT3	0.210943	0.217224	1.4854e-05	-0.292248	0.00609214	0.509471	sp.Q96EY9.ADAT3_HUMAN	0.491824	0.117765	0.00988673	-0.215028	0.0700054	0.332793	Buffering	Scaling	Buffering	Buffering
168	ADCK1	ADCK1	0.09326	0.187392	1.29836e-06	-0.372174	1.33324e-05	0.559566	sp.Q86TW2.ADCK1_HUMAN	0.11853	0.246715	0.861746	0.017617	0.171124	0.229098	Buffering	Scaling	Buffering	Buffering
169	ADCK5	ADCK5	4.1018e-05	0.314574	0.00360821	-0.327924	4.39389e-07	0.642499	sp.Q3MIX3.ADCK5_HUMAN	0.0552939	0.272527	0.158407	-0.2099	0.00528118	0.482427	Scaling	Scaling	Scaling	Buffering
170	ADCY3	ADCY3	0.0218422	0.338979	0.132504	-0.239101	0.00453932	0.57808	sp.O60266.ADCY3_HUMAN	0.283997	0.11735	0.62897	0.0519558	0.632266	0.0653943	Scaling	Buffering	Buffering	Buffering
171	ADCY5	ADCY5	0.412595	0.103064	0.57607	0.115843	0.955608	-0.0127782	sp.O95622.ADCY5_HUMAN	0.832611	0.027123	0.106485	0.293572	0.18545	-0.266449	Buffering	Anti-Scaling	Buffering	Anti-Scaling
172	ADCY6	ADCY6	0.00348277	0.563166	0.192346	-0.202576	0.000610136	0.765742	sp.O43306.ADCY6_HUMAN	0.0883824	0.305032	0.578509	-0.0790705	0.0588025	0.384102	Scaling	Buffering	Scaling	Buffering
173	ADCY9	ADCY9	0.176949	0.253893	0.0226227	-0.256132	0.0114465	0.510025	sp.O60503.ADCY9_HUMAN	0.289991	0.154367	0.174296	-0.128343	0.0608833	0.28271	Scaling	Scaling	Buffering	Buffering
174	ADD1	ADD1	0.018398	0.444612	7.56323e-07	-0.307463	0.000372649	0.752075	sp.P35611.3.ADDA_HUMAN	0.208377	0.187952	0.489396	0.0558424	0.389903	0.13211	Scaling	Scaling	Buffering	Buffering
175	ADD2	ADD2	0.538306	0.174906	0.657496	-0.126032	0.410833	0.300938	sp.P35612.ADDB_HUMAN	0.341812	0.250242	0.328082	-0.2481	0.140092	0.498342	Buffering	Buffering	Scaling	Buffering
176	ADD3	ADD3	0.867621	0.0504187	0.0125113	-0.369458	0.182221	0.419877	sp.Q9UEY8.ADDG_HUMAN	0.0663791	0.405294	0.0501131	-0.197848	0.00960587	0.603142	Buffering	Scaling	Scaling	Buffering
177	ADH5	ADH5	0.579194	0.143996	3.43895e-09	-0.389878	0.0573012	0.533874	sp.P11766.ADHX_HUMAN	0.221541	0.273816	2.58285e-07	-0.368509	0.0103699	0.642326	Buffering	Scaling	Scaling	Scaling
178	ADI1	ADI1	0.34519	0.0945822	0.0164168	-0.254766	0.00984309	0.349348	sp.Q9BV57.MTND_HUMAN	0.896333	0.0174672	0.0599909	-0.273251	0.110549	0.290718	Buffering	Scaling	Buffering	Scaling
179	ADIPOR1	ADIPOR1	1.46571e-05	0.246876	0.00555108	-0.308723	6.54179e-06	0.555599	sp.Q96A54.ADR1_HUMAN	0.00573664	0.498817	0.971716	0.00787563	0.0680084	0.490942	Buffering	Scaling	Scaling	Buffering
180	ADIPOR2	ADIPOR2	9.73696e-06	0.322162	4.49058e-05	-0.324061	1.36398e-10	0.646223	sp.Q86V24.ADR2_HUMAN	0.619657	0.113639	0.133285	-0.460119	0.0940267	0.573758	Scaling	Scaling	Buffering	Scaling
181	ADIRF	ADIRF	0.95183	0.0454649	0.185017	0.480551	0.579596	-0.435086	sp.Q15847.ADIRF_HUMAN	0.356012	-0.530946	0.30594	0.273875	0.174173	-0.804821	Buffering	Anti-Scaling	Anti-Scaling	Anti-Scaling
182	ADK	ADK	0.514733	0.0985413	0.0685832	-0.187786	0.0965009	0.286327	sp.P55263.ADK_HUMAN	0.424436	0.122102	0.177303	-0.12007	0.145211	0.242172	Buffering	Buffering	Buffering	Buffering
183	ADNP	ADNP	1.54533e-06	0.250544	0.440846	-0.112548	0.0198194	0.363092	sp.Q9H2P0.ADNP_HUMAN	0.014937	0.139339	0.173755	-0.192688	0.0243192	0.332027	Scaling	Buffering	Buffering	Buffering
184	ADNP2	ADNP2	0.412242	0.15184	1.57812e-18	-0.576932	0.000671842	0.728772	sp.Q6IQ32.ADNP2_HUMAN	0.450883	-0.183505	0.00598765	-0.220796	0.87728	0.0372903	Buffering	Scaling	Anti-Scaling	Buffering
185	ADO	ADO	0.0609002	0.224841	0.000468189	-0.238645	0.000702279	0.463487	sp.Q96SZ5.AEDO_HUMAN	0.825451	0.0290391	0.00255807	-0.211974	0.0896664	0.241013	Buffering	Buffering	Buffering	Buffering
186	ADPGK	ADPGK	0.000208389	0.313156	4.11762e-10	-0.408906	3.66122e-11	0.722062	sp.Q9BRR6.ADPGK_HUMAN	0.000573583	0.398714	0.0421097	-0.163398	1.39968e-05	0.562112	Scaling	Scaling	Scaling	Buffering
187	ADPRH	ADPRH	0.0435242	-0.238204	0.140751	-0.249163	0.9514	0.0109591	sp.P54922.ADPRH_HUMAN	0.285166	-0.206333	0.873839	0.0465339	0.411766	-0.252867	Anti-Scaling	Buffering	Anti-Scaling	Buffering
188	ADPRHL2	ADPRHL2	2.20468e-05	0.374987	7.45512e-12	-0.443144	2.22146e-13	0.818131	sp.Q9NX46.ARHL2_HUMAN	0.217771	0.131532	0.000418334	-0.219441	0.00289397	0.350974	Scaling	Scaling	Buffering	Buffering
189	ADRM1	ADRM1	3.04598e-14	0.463028	0.545061	0.0705951	0.00239459	0.392432	sp.Q16186.ADRM1_HUMAN	0.0312993	0.107511	0.45705	0.0966292	0.932552	0.0108822	Scaling	Buffering	Buffering	Buffering
190	ADSL	ADSL	0.000157613	0.462217	2.00421e-11	-0.474483	7.18321e-10	0.9367	sp.P30566.PUR8_HUMAN	0.0635836	0.335852	2.92118e-08	-0.448904	0.000122221	0.784757	Scaling	Scaling	Scaling	Scaling
191	ADSS	ADSS	0.000762624	0.208008	0.00653599	-0.3275	3.99987e-05	0.535508	sp.P30520.PURA2_HUMAN	0.019755	0.218075	0.0294656	-0.269136	0.000663645	0.487211	Buffering	Scaling	Buffering	Scaling
192	ADSSL1	ADSSL1	0.0255227	0.511571	9.33671e-05	-0.535448	2.73262e-05	1.04702	sp.Q8N142.PURA1_HUMAN	0.863201	-0.0229857	0.570964	-0.0549017	0.820535	0.031916	Scaling	Scaling	Buffering	Buffering
193	AEBP1	AEBP1	0.923136	-0.0213025	0.0484085	0.796916	0.0451109	-0.818218	sp.Q8IUX7.AEBP1_HUMAN	0.285779	0.265927	0.0214822	0.788368	0.146152	-0.522441	Buffering	Anti-Scaling	Scaling	Anti-Scaling
194	AEBP2	AEBP2	1.4223e-08	0.434923	2.42186e-11	-0.521754	1.65719e-21	0.956677	sp.Q6ZN18.AEBP2_HUMAN	0.0399656	0.263524	6.49832e-06	-0.489745	1.00556e-06	0.75327	Scaling	Scaling	Scaling	Scaling
195	AES	AES	0.183294	0.225831	0.00123909	-0.273493	0.00636172	0.499325	sp.Q08117.2.AES_HUMAN	0.699514	-0.104143	0.0036712	-0.247942	0.59836	0.143799	Buffering	Scaling	Anti-Scaling	Buffering
196	AFAP1	AFAP1	0.10792	0.649344	0.414118	0.118701	0.181795	0.530643	sp.Q8N556.2.AFAP1_HUMAN	0.0490159	0.848992	0.0531699	0.232652	0.141539	0.61634	Scaling	Anti-Scaling	Scaling	Anti-Scaling
197	AFAP1L1	AFAP1L1	0.290562	0.302785	0.688874	0.0759865	0.465549	0.226798	sp.Q8TED9.AF1L1_HUMAN	0.0819175	0.486196	0.705936	0.0728793	0.167872	0.413317	Scaling	Buffering	Scaling	Buffering
198	AFAP1L2	AFAP1L2	0.248496	0.543852	0.794166	-0.0507128	0.220002	0.594565	sp.Q8N4X5.4.AF1L2_HUMAN	0.144513	0.518974	0.551328	-0.0987609	0.0920186	0.617735	Scaling	Buffering	Scaling	Buffering
199	AFF1	AFF1	0.0444194	0.653074	1.23414e-06	-0.417647	0.00310717	1.07072	sp.P51825.2.AFF1_HUMAN	0.307678	0.278889	0.0817168	-0.13369	0.142584	0.412578	Scaling	Scaling	Scaling	Buffering
200	AFF3	AFF3	0.852546	0.039789	0.593085	0.0947726	0.828477	-0.0549836	sp.P51826.2.AFF3_HUMAN	0.997924	-0.000396894	0.402731	0.114652	0.52258	-0.115049	Buffering	Buffering	Buffering	Anti-Scaling
201	AFF4	AFF4	0.000316105	0.402091	0.0066942	-0.232064	1.13346e-06	0.634155	sp.Q9UHB7.AFF4_HUMAN	0.0484729	0.159065	0.617082	0.0303675	0.158364	0.128697	Scaling	Buffering	Buffering	Buffering
202	AFG3L2	AFG3L2	4.45207e-06	0.345372	1.75024e-13	-0.530475	7.16691e-19	0.875847	sp.Q9Y4W6.AFG32_HUMAN	3.81232e-05	0.271826	1.97794e-08	-0.34718	3.35152e-14	0.619006	Scaling	Scaling	Scaling	Scaling
203	AFMID	AFMID	0.0101856	0.252295	0.0157103	-0.247829	8.18719e-05	0.500124	sp.Q63HM1.2.KFA_HUMAN	0.42731	-0.202511	0.0250764	-0.545232	0.279637	0.342722	Scaling	Buffering	Anti-Scaling	Scaling
204	AFP	AFP	0.304663	-0.327736	0.863814	-0.0298145	0.361322	-0.297921	sp.P02771.FETA_HUMAN	0.247773	0.405457	0.411299	0.0938504	0.370575	0.311607	Anti-Scaling	Buffering	Scaling	Buffering
205	AFTPH	AFTPH	0.187505	0.110568	0.012772	-0.19394	0.00364564	0.304508	sp.Q6ULP2.AFTIN_HUMAN	0.791628	-0.0239518	0.0114443	-0.211225	0.090692	0.187273	Buffering	Buffering	Buffering	Buffering
206	AGA	AGA	0.147963	0.537045	0.0968679	-0.185792	0.0603743	0.722836	sp.P20933.ASPG_HUMAN	0.0157137	0.88252	0.722675	-0.0403518	0.0127781	0.922872	Scaling	Buffering	Scaling	Buffering
207	AGAP1	AGAP1	0.0159461	0.379025	0.722822	0.0406628	0.0415435	0.338362	sp.Q9UPQ3.AGAP1_HUMAN	0.0109094	0.270923	0.117557	-0.16027	0.000900113	0.431192	Scaling	Buffering	Scaling	Buffering
208	AGAP2	AGAP2	0.00232122	-0.480277	0.153472	-0.240841	0.235168	-0.239436	sp.Q99490.2.AGAP2_HUMAN	0.0888079	-0.355654	0.727221	0.117667	0.202867	-0.473321	Anti-Scaling	Buffering	Anti-Scaling	Anti-Scaling
209	AGAP3	AGAP3	1.20105e-07	0.562562	0.110771	-0.186447	1.29322e-08	0.749009	sp.Q96P47.4.AGAP3_HUMAN	5.86049e-07	0.379576	0.349761	-0.0835495	4.85474e-06	0.463126	Scaling	Buffering	Scaling	Buffering
210	AGFG1	AGFG1	0.0135629	0.227442	0.719994	-0.0324721	0.0231796	0.259914	sp.P52594.4.AGFG1_HUMAN	0.127125	0.167785	0.0397037	-0.139991	0.0114684	0.307776	Buffering	Buffering	Buffering	Buffering
211	AGFG2	AGFG2	0.000933849	0.343422	0.158397	-0.206484	0.000484784	0.549905	sp.O95081.AGFG2_HUMAN	0.0900401	0.175455	0.0264643	-0.507074	0.00392303	0.68253	Scaling	Buffering	Buffering	Scaling
212	AGGF1	AGGF1	0.00281068	0.252157	1.40661e-06	-0.297476	3.03347e-08	0.549632	sp.Q8N302.AGGF1_HUMAN	0.666327	0.0391904	0.0180891	-0.154494	0.0545201	0.193685	Scaling	Scaling	Buffering	Buffering
213	AGK	AGK	2.36058e-08	0.44509	0.0571205	-0.187758	3.56857e-08	0.632848	sp.Q53H12.AGK_HUMAN	9.47337e-07	0.372634	0.170995	-0.145277	1.40477e-05	0.51791	Scaling	Buffering	Scaling	Buffering
214	AGL	AGL	0.0387002	0.289788	0.00775803	-0.22534	0.000990253	0.515128	sp.P35573.GDE_HUMAN	0.256748	-0.136288	0.000335827	-0.267073	0.313771	0.130785	Scaling	Buffering	Anti-Scaling	Scaling
215	AGMAT	AGMAT	0.691671	-0.0914599	0.0125649	0.443864	0.0451822	-0.535324	sp.Q9BSE5.SPEB_HUMAN	0.558651	0.178929	0.0850299	0.36805	0.576978	-0.189121	Buffering	Anti-Scaling	Buffering	Anti-Scaling
216	AGO1	AGO1	0.000493464	0.415305	9.24507e-05	-0.31946	1.21387e-07	0.734765	sp.Q9UL18.AGO1_HUMAN	0.0367909	0.218096	0.0208861	-0.195543	0.000967383	0.413639	Scaling	Scaling	Buffering	Buffering
217	AGO2	AGO2	0.00146073	0.239733	0.204694	-0.152823	0.00254275	0.392555	sp.Q9UKV8.AGO2_HUMAN	0.00110088	0.198067	0.0103497	-0.217398	1.17749e-05	0.415465	Buffering	Buffering	Buffering	Buffering
218	AGO3	AGO3	0.0179276	0.30475	0.000856942	-0.260602	8.97611e-05	0.565352	sp.Q9H9G7.AGO3_HUMAN	0.49918	-0.0634828	0.081457	-0.114301	0.626184	0.0508179	Scaling	Scaling	Buffering	Buffering
219	AGO4	AGO4	0.000527169	0.457871	0.00174178	-0.264906	8.16437e-07	0.722776	sp.Q9HCK5.AGO4_HUMAN	0.508576	-0.0576622	0.0318862	-0.129218	0.458059	0.0715556	Scaling	Scaling	Buffering	Buffering
220	AGPAT1	AGPAT1	0.000917426	0.4082	0.00297767	-0.336342	1.94423e-06	0.744542	sp.Q99943.PLCA_HUMAN	0.00771525	0.331487	0.170392	-0.132501	0.00147269	0.463988	Scaling	Scaling	Scaling	Buffering
221	AGPAT2	AGPAT2	0.000594768	0.479738	0.463976	-0.0919491	0.000284769	0.571688	sp.O15120.PLCB_HUMAN	0.00823847	0.29693	0.112624	0.147459	0.198751	0.149471	Scaling	Buffering	Scaling	Anti-Scaling
222	AGPAT3	AGPAT3	0.0327892	0.308654	0.000391034	-0.367786	2.4265e-05	0.676439	sp.Q9NRZ7.3.PLCC_HUMAN	0.787212	0.0330569	0.134633	-0.123287	0.227445	0.156344	Scaling	Scaling	Buffering	Buffering
223	AGPAT4	AGPAT4	0.602222	-0.143201	1.28702e-06	-0.550898	0.144772	0.407697	sp.Q9NRZ5.PLCD_HUMAN	0.841743	-0.105575	0.0626159	-0.341051	0.658868	0.235476	Anti-Scaling	Scaling	Anti-Scaling	Scaling
224	AGPAT5	AGPAT5	0.000107483	0.416905	3.68892e-21	-0.717659	4.70353e-16	1.13456	sp.Q9NUQ2.PLCE_HUMAN	0.0577923	0.292304	8.99074e-09	-0.41684	2.37356e-05	0.709143	Scaling	Scaling	Scaling	Scaling
225	AGPS	AGPS	0.00334911	0.415396	0.371192	-0.127341	0.00367828	0.542737	sp.O00116.ADAS_HUMAN	0.0457833	0.23887	0.549494	-0.0599473	0.0379918	0.298818	Scaling	Buffering	Buffering	Buffering
226	AGR2	AGR2	0.0379534	0.864811	0.112925	-0.818239	0.00326771	1.68305	sp.O95994.AGR2_HUMAN	0.182854	0.304759	0.197013	-0.395757	0.0301963	0.700516	Scaling	Scaling	Scaling	Scaling
227	AGR3	AGR3	0.0106215	0.591799	0.536969	-0.148403	0.011785	0.740202	sp.Q8TD06.AGR3_HUMAN	0.698125	-0.128879	0.605148	-0.190852	0.882356	0.061973	Scaling	Buffering	Anti-Scaling	Buffering
228	AGRN	AGRN	0.177721	0.395695	0.137057	0.255353	0.647241	0.140343	sp.O00468.6.AGRIN_HUMAN	0.052697	0.431931	0.486834	0.093274	0.154656	0.338657	Scaling	Anti-Scaling	Scaling	Buffering
229	AGT	AGT	0.0246634	0.536812	0.627306	-0.113746	0.0373067	0.650558	sp.P01019.ANGT_HUMAN	0.047057	1.15611	0.818874	0.098495	0.107921	1.05762	Scaling	Buffering	Scaling	Buffering
230	AGTPBP1	AGTPBP1	0.195008	0.199477	4.13631e-06	-0.412907	0.000266488	0.612384	sp.Q9UPW5.CBPC1_HUMAN	0.675929	0.060307	3.07246e-06	-0.454367	0.000994704	0.514674	Buffering	Scaling	Buffering	Scaling
231	AGTRAP	AGTRAP	0.171	0.272771	0.246147	-0.106372	0.0654971	0.379143	sp.Q6RW13.ATRAP_HUMAN	0.491894	0.139873	0.521673	-0.0665552	0.335928	0.206429	Scaling	Buffering	Buffering	Buffering
232	AHCTF1	AHCTF1	1.87071e-08	0.359572	0.143652	-0.172981	5.77677e-05	0.532553	sp.Q8WYP5.2.ELYS_HUMAN	0.0982804	0.0992274	0.39526	0.0693143	0.747051	0.0299131	Scaling	Buffering	Buffering	Buffering
233	AHCY	AHCY	2.18397e-08	0.350169	0.732226	-0.0618177	0.0323865	0.411987	sp.P23526.SAHH_HUMAN	0.00647256	0.177331	0.131459	-0.211713	0.00972257	0.389044	Scaling	Buffering	Buffering	Buffering
234	AHCYL1	AHCYL1	1.23752e-07	0.480467	0.000729798	-0.303745	2.25949e-11	0.784212	sp.O43865.SAHH2_HUMAN	0.352728	-0.0862006	0.000224765	-0.287456	0.0672055	0.201255	Scaling	Scaling	Buffering	Scaling
235	AHCYL2	AHCYL2	0.00848813	0.309184	8.26489e-05	-0.5486	3.84936e-08	0.857784	sp.Q96HN2.SAHH3_HUMAN	0.110352	0.0885937	0.000593517	-0.290561	1.69997e-05	0.379155	Scaling	Scaling	Buffering	Scaling
236	AHDC1	AHDC1	0.00502182	0.626993	0.00347855	-0.294983	0.000132704	0.921976	sp.Q5TGY3.AHDC1_HUMAN	0.00504672	0.560296	0.00371082	-0.23321	0.000202043	0.793506	Scaling	Scaling	Scaling	Buffering
237	AHNAK	AHNAK	0.0985184	0.434194	0.0191653	0.423553	0.966736	0.0106411	sp.Q09666.2.AHNK_HUMAN	0.233364	0.507441	0.272274	0.382038	0.762161	0.125403	Scaling	Anti-Scaling	Scaling	Anti-Scaling
238	AHNAK	AHNAK	0.0985184	0.434194	0.0191653	0.423553	0.966736	0.0106411	sp.Q09666.AHNK_HUMAN	0.0220296	0.386223	0.208105	0.166322	0.211622	0.219902	Scaling	Anti-Scaling	Scaling	Anti-Scaling
239	AHNAK2	AHNAK2	0.0131481	0.836631	0.739214	0.0870166	0.0477462	0.749614	sp.Q8IVF2.AHNK2_HUMAN	0.00130795	0.824436	0.171388	0.28425	0.0623446	0.540186	Scaling	Buffering	Scaling	Anti-Scaling
240	AHR	AHR	3.91176e-07	0.89975	0.371431	-0.196476	6.68003e-06	1.09623	sp.P35869.AHR_HUMAN	0.00810566	0.35232	0.377992	-0.15753	0.00724155	0.509849	Scaling	Buffering	Scaling	Buffering
241	AHSA1	AHSA1	0.000256841	0.330664	9.66072e-06	-0.329205	2.09022e-09	0.659869	sp.O95433.AHSA1_HUMAN	0.408384	-0.0795146	0.000103233	-0.294152	0.0415066	0.214638	Scaling	Scaling	Buffering	Scaling
242	AIDA	AIDA	0.307411	0.0874135	0.964023	0.00488443	0.499238	0.0825291	sp.Q96BJ3.AIDA_HUMAN	0.000653408	0.229564	0.634183	0.0358686	0.027682	0.193696	Buffering	Buffering	Buffering	Buffering
243	AIF1	AIF1	0.507378	0.222533	0.143244	-0.276356	0.162004	0.498889	sp.P55008.AIF1_HUMAN	0.164189	0.550669	0.395859	-0.297313	0.0786648	0.847982	Buffering	Scaling	Scaling	Scaling
244	AIF1L	AIF1L	0.721064	0.0939685	0.0991019	0.359528	0.359414	-0.26556	sp.Q9BQI0.AIF1L_HUMAN	0.340065	0.220539	0.375486	0.164998	0.826182	0.0555409	Buffering	Anti-Scaling	Buffering	Anti-Scaling
245	AIFM2	AIFM2	0.68972	-0.152217	0.116374	-0.234949	0.831359	0.082732	sp.Q9BRQ8.AIFM2_HUMAN	0.777406	0.08744	0.632963	-0.0592556	0.641322	0.146696	Anti-Scaling	Buffering	Buffering	Buffering
246	AIMP1	AIMP1	0.382994	0.157447	0.00784527	-0.130107	0.124742	0.287554	sp.Q12904.2.AIMP1_HUMAN	0.133541	0.281103	0.752633	-0.0181945	0.110565	0.299297	Buffering	Buffering	Scaling	Buffering
247	AIMP2	AIMP2	4.73729e-08	0.369849	0.000136678	-0.411857	1.93207e-10	0.781706	sp.Q13155.AIMP2_HUMAN	0.0908203	0.0678072	0.000154673	-0.234029	2.69006e-06	0.301836	Scaling	Scaling	Buffering	Buffering
248	AIP	AIP	0.0206703	0.181503	0.943231	-0.00676153	0.0845982	0.188265	sp.O00170.AIP_HUMAN	0.207492	0.128907	0.207973	-0.110742	0.0391328	0.23965	Buffering	Buffering	Buffering	Buffering
249	AJUBA	AJUBA	0.00207436	0.732826	0.326594	-0.195419	0.000545257	0.928245	sp.Q96IF1.AJUBA_HUMAN	0.0688779	0.257791	0.290339	-0.135858	0.016409	0.39365	Scaling	Buffering	Scaling	Buffering
250	AK1	AK1	0.0014475	0.43616	0.0722566	-0.252774	2.32538e-05	0.688934	sp.P00568.KAD1_HUMAN	0.0389889	0.361882	0.0397239	-0.245025	0.000846583	0.606908	Scaling	Scaling	Scaling	Buffering
251	AK2	AK2	0.0199711	0.217628	1.1404e-06	-0.28388	3.56874e-06	0.501507	sp.P54819.KAD2_HUMAN	0.239544	0.16533	0.636838	-0.0350709	0.170071	0.200401	Buffering	Scaling	Buffering	Buffering
252	AK3	AK3	0.0139349	0.352408	5.65432e-11	-0.5939	1.94532e-08	0.946308	sp.Q9UIJ7.KAD3_HUMAN	0.457358	0.135894	0.000124666	-0.325902	0.0153937	0.461796	Scaling	Scaling	Buffering	Scaling
253	AK4	AK4	0.0338369	0.536075	0.124572	-0.266226	0.00383469	0.802302	sp.P27144.KAD4_HUMAN	0.0935153	0.415292	0.340034	-0.133131	0.0386959	0.548424	Scaling	Scaling	Scaling	Buffering
254	AK5	AK5	0.0631902	0.782537	0.00799364	-0.468423	0.00461195	1.25096	sp.Q9Y6K8.KAD5_HUMAN	0.458934	0.19393	0.167284	-0.302878	0.11842	0.496808	Scaling	Scaling	Buffering	Scaling
255	AK6	AK6	0.000339256	0.397132	2.84541e-05	-0.298392	5.21323e-08	0.695524	sp.Q9Y3D8.KAD6_HUMAN	0.00455757	0.382061	4.48593e-06	-0.388137	6.67736e-07	0.770198	Scaling	Scaling	Scaling	Scaling
256	AKAP1	AKAP1	0.0518454	0.16899	0.392761	-0.0872776	0.029541	0.256267	sp.Q92667.AKAP1_HUMAN	0.166931	0.121381	0.0775955	-0.177733	0.0128971	0.299114	Buffering	Buffering	Buffering	Buffering
257	AKAP10	AKAP10	0.000345248	0.322776	1.65325e-13	-0.449501	6.8776e-12	0.772277	sp.O43572.AKA10_HUMAN	0.00545881	0.257297	0.00108256	-0.195387	1.07769e-05	0.452685	Scaling	Scaling	Scaling	Buffering
258	AKAP11	AKAP11	0.010849	0.31809	1.7256e-06	-0.324052	3.86304e-06	0.642142	sp.Q9UKA4.AKA11_HUMAN	0.222868	0.127505	0.000368507	-0.236253	0.00108324	0.363758	Scaling	Scaling	Buffering	Buffering
259	AKAP12	AKAP12	0.686306	-0.221461	0.00701795	-0.643923	0.445252	0.422462	sp.Q02952.AKA12_HUMAN	0.95327	-0.0274178	0.408978	-0.158893	0.78186	0.131475	Anti-Scaling	Scaling	Buffering	Buffering
260	AKAP13	AKAP13	0.00130438	0.439733	7.96365e-05	-0.330856	1.05791e-06	0.770589	sp.Q12802.AKP13_HUMAN	0.0134376	0.398266	0.0654492	-0.131666	0.00189644	0.529932	Scaling	Scaling	Scaling	Buffering
261	AKAP2	AKAP2	0.0564604	0.630675	0.216648	-0.250496	0.0110366	0.881171	sp.Q9Y2D5.6.AKAP2_HUMAN	0.0438983	0.393728	0.704457	0.0489573	0.093957	0.344771	Scaling	Scaling	Scaling	Buffering
262	AKAP5	AKAP5	0.48623	0.0923105	0.000126315	-0.248446	0.0130658	0.340756	sp.P24588.AKAP5_HUMAN	0.0847392	0.462296	0.225975	-0.213458	0.0145429	0.675754	Buffering	Buffering	Scaling	Buffering
263	AKAP6	AKAP6	0.194018	0.207746	0.649637	0.0570922	0.392654	0.150653	sp.Q13023.AKAP6_HUMAN	0.235806	-0.240629	0.121774	-0.20115	0.852338	-0.0394792	Buffering	Buffering	Anti-Scaling	Buffering
264	AKAP8	AKAP8	0.0491101	0.190942	5.19736e-05	-0.216032	0.000246016	0.406974	sp.O43823.AKAP8_HUMAN	0.147039	0.197851	0.892468	-0.00825743	0.137447	0.206109	Buffering	Buffering	Buffering	Buffering
265	AKAP8L	AKAP8L	0.000673419	0.387592	6.77064e-07	-0.300627	3.05617e-07	0.688219	sp.Q9ULX6.AKP8L_HUMAN	0.0926508	0.184968	0.363893	-0.0512921	0.0395322	0.23626	Scaling	Scaling	Buffering	Buffering
266	AKAP9	AKAP9	1.74337e-07	0.451573	0.0188585	-0.281114	1.13444e-07	0.732687	sp.Q99996.2.AKAP9_HUMAN	1.00995e-05	0.212178	0.0443957	-0.13846	5.9286e-06	0.350638	Scaling	Scaling	Buffering	Buffering
267	AKIRIN2	AKIRIN2	0.0048808	0.32587	9.1152e-11	-0.429445	1.05373e-07	0.755315	sp.Q53H80.AKIR2_HUMAN	0.0183739	0.340968	0.0726123	-0.151822	0.00159866	0.492789	Scaling	Scaling	Scaling	Buffering
268	AKNA	AKNA	0.693082	0.0698057	7.46565e-05	-0.551192	0.00093929	0.620998	sp.Q7Z591.AKNA_HUMAN	0.497605	-0.153683	0.0940353	-0.279364	0.599329	0.125681	Buffering	Scaling	Anti-Scaling	Scaling
269	AKR1A1	AKR1A1	2.2751e-05	0.460444	0.0076354	-0.247763	4.36568e-08	0.708207	sp.P14550.AK1A1_HUMAN	0.960181	0.00867418	0.038228	-0.200804	0.25515	0.209478	Scaling	Buffering	Buffering	Buffering
270	AKR1B1	AKR1B1	0.103005	0.504779	0.855746	0.0758735	0.339266	0.428905	sp.P15121.ALDR_HUMAN	0.0064566	0.459104	0.392581	-0.19022	0.0073074	0.649323	Scaling	Buffering	Scaling	Buffering
271	AKR1B10	AKR1B10	0.133916	0.483421	0.218121	0.608253	0.808183	-0.124832	sp.O60218.AK1BA_HUMAN	0.100966	0.361715	0.556475	0.171222	0.546683	0.190493	Scaling	Anti-Scaling	Scaling	Anti-Scaling
272	AKR1B15	AKR1B15	0.798683	0.0342182	0.160193	0.283438	0.241585	-0.24922	sp.C9JRZ8.AK1BF_HUMAN	0.0753297	0.350291	0.988752	-0.00376787	0.2062	0.354059	Buffering	Anti-Scaling	Scaling	Buffering
273	AKR1C1	AKR1C1	0.683758	0.263107	0.683466	-0.141063	0.545261	0.40417	sp.Q04828.AK1C1_HUMAN	0.520793	0.248153	0.0744542	-0.355137	0.12209	0.603289	Scaling	Buffering	Buffering	Scaling
274	AKR1C2	AKR1C2	0.444127	0.503453	0.799637	-0.0942021	0.378527	0.597655	sp.P52895.AK1C2_HUMAN	0.75266	0.263729	0.0901645	-0.457121	0.393774	0.720851	Scaling	Buffering	Scaling	Scaling
275	AKR1C3	AKR1C3	0.685649	0.265386	0.0597594	-0.619143	0.188407	0.884529	sp.P42330.AK1C3_HUMAN	0.508036	0.254102	0.000870229	-0.575598	0.0344251	0.8297	Scaling	Scaling	Scaling	Scaling
276	AKR1D1	AKR1D1	0.171491	-0.0406164	0.161341	-0.04456	0.827848	0.00394364	sp.P51857.AK1D1_HUMAN	0.173627	0.248232	0.54932	0.161008	0.760504	0.0872241	Buffering	Buffering	Buffering	Anti-Scaling
277	AKR7A2	AKR7A2	0.0130859	0.275872	0.00485404	-0.203814	0.000118868	0.479686	sp.O43488.ARK72_HUMAN	0.823727	-0.0206076	0.0721213	-0.124345	0.313125	0.103738	Scaling	Buffering	Buffering	Buffering
278	AKR7A3	AKR7A3	0.00439222	-0.311181	0.485746	0.105853	0.00774774	-0.417034	sp.O95154.ARK73_HUMAN	0.00885145	-0.536736	0.405049	0.208157	0.00365718	-0.744894	Anti-Scaling	Anti-Scaling	Anti-Scaling	Anti-Scaling
279	AKT1	AKT1	0.00465622	0.322251	6.45048e-07	-0.378669	9.48095e-08	0.700919	sp.P31749.AKT1_HUMAN	0.632502	0.0602073	0.0683054	-0.148224	0.116163	0.208431	Scaling	Scaling	Buffering	Buffering
280	AKT1S1	AKT1S1	0.00291033	0.277157	0.00141109	-0.265387	4.58784e-07	0.542544	sp.Q96B36.3.AKTS1_HUMAN	0.152636	0.136263	0.00428289	-0.235258	0.000714658	0.371521	Scaling	Scaling	Buffering	Buffering
281	AKT2	AKT2	6.87273e-06	0.375272	0.0863888	-0.170863	5.64595e-06	0.546136	sp.P31751.AKT2_HUMAN	0.303783	-0.0822792	0.0174685	-0.20674	0.214321	0.124461	Scaling	Buffering	Buffering	Buffering
282	AKT3	AKT3	0.431548	-0.184102	0.0887211	0.481487	0.044287	-0.665589	sp.Q9Y243.AKT3_HUMAN	0.473198	-0.155296	0.988186	-0.00315435	0.570928	-0.152142	Anti-Scaling	Anti-Scaling	Anti-Scaling	Buffering
283	AKTIP	AKTIP	1.52005e-06	0.663194	0.0648124	-0.225246	8.73718e-08	0.88844	sp.Q9H8T0.2.AKTIP_HUMAN	0.00734336	0.35284	0.224732	-0.176712	0.00174991	0.529553	Scaling	Buffering	Scaling	Buffering
284	ALAD	ALAD	0.537294	0.0666601	0.000609924	-0.31363	0.00321446	0.38029	sp.P13716.HEM2_HUMAN	0.269034	0.136499	0.00370149	-0.258134	0.00404857	0.394633	Buffering	Scaling	Buffering	Scaling
285	ALAS1	ALAS1	0.447131	0.135615	1.41982e-07	-0.374604	0.00990338	0.510219	sp.P13196.HEM1_HUMAN	0.616028	0.0857845	0.0958647	0.14313	0.743569	-0.0573456	Buffering	Scaling	Buffering	Anti-Scaling
286	ALCAM	ALCAM	0.119605	0.374004	0.646024	-0.144141	0.147803	0.518145	sp.Q13740.CD166_HUMAN	0.0676633	0.331148	0.526078	-0.142143	0.0662449	0.473292	Scaling	Buffering	Scaling	Buffering
287	ALCAM	ALCAM	0.119605	0.374004	0.646024	-0.144141	0.147803	0.518145	sp.Q13740.2.CD166_HUMAN	0.12314	0.3774	0.314616	0.237446	0.595159	0.139954	Scaling	Buffering	Scaling	Anti-Scaling
288	ALDH16A1	ALDH16A1	0.00508933	0.288579	3.26212e-06	-0.460433	9.1931e-09	0.749012	sp.Q8IZ83.A16A1_HUMAN	0.483811	0.0621104	8.78659e-05	-0.339525	0.000308371	0.401636	Scaling	Scaling	Buffering	Scaling
289	ALDH18A1	ALDH18A1	0.0207601	0.323075	2.35921e-12	-0.533939	7.20974e-07	0.857013	sp.P54886.P5CS_HUMAN	0.558528	0.103823	0.00012788	-0.242091	0.0630864	0.345914	Scaling	Scaling	Buffering	Buffering
290	ALDH1A1	ALDH1A1	0.760515	0.158035	0.991597	0.00385485	0.78149	0.15418	sp.P00352.AL1A1_HUMAN	0.744488	0.0958268	0.849723	-0.0406771	0.667217	0.136504	Buffering	Buffering	Buffering	Buffering
291	ALDH1A2	ALDH1A2	0.536506	0.169369	0.783669	0.0410779	0.656167	0.128291	sp.O94788.AL1A2_HUMAN	0.363466	0.229788	0.729534	0.0431878	0.475332	0.1866	Buffering	Buffering	Buffering	Buffering
292	ALDH1A3	ALDH1A3	0.0539342	1.42793	0.00148391	1.10375	0.661863	0.324181	sp.P47895.AL1A3_HUMAN	0.06664	0.884575	0.0567524	0.384316	0.302245	0.500259	Scaling	Anti-Scaling	Scaling	Anti-Scaling
293	ALDH1B1	ALDH1B1	0.0369757	0.502242	0.000317069	-0.367157	0.00064871	0.869399	sp.P30837.AL1B1_HUMAN	0.0407244	0.423138	0.0475037	-0.200294	0.0035383	0.623432	Scaling	Scaling	Scaling	Buffering
294	ALDH1L1	ALDH1L1	0.266566	0.200459	0.000507854	-0.550262	0.000217808	0.750721	sp.O75891.3.AL1L1_HUMAN	0.729367	0.0750457	0.00724924	-0.548736	0.0153841	0.623782	Buffering	Scaling	Buffering	Scaling
295	ALDH1L2	ALDH1L2	0.654344	-0.124893	0.367048	0.182386	0.334376	-0.307279	sp.Q3SY69.AL1L2_HUMAN	0.297911	0.307366	0.303759	0.205811	0.756693	0.101555	Anti-Scaling	Anti-Scaling	Scaling	Anti-Scaling
296	ALDH2	ALDH2	0.546324	0.286422	0.00831385	-0.875724	0.0337773	1.16215	sp.P05091.ALDH2_HUMAN	0.168823	0.418056	0.062564	-0.410327	0.019063	0.828383	Scaling	Scaling	Scaling	Scaling
297	ALDH3A1	ALDH3A1	0.0831488	1.23862	0.0928876	0.543808	0.33668	0.694812	sp.P30838.AL3A1_HUMAN	0.0874271	0.659306	0.139648	0.297849	0.365185	0.361456	Scaling	Anti-Scaling	Scaling	Anti-Scaling
298	ALDH3A2	ALDH3A2	0.0213966	0.557985	0.0120181	-0.362208	0.00042532	0.920193	sp.P51648.2.AL3A2_HUMAN	0.0400403	0.463405	0.0712242	-0.192343	0.0055494	0.655748	Scaling	Scaling	Scaling	Buffering
299	ALDH3B1	ALDH3B1	0.830496	-0.0590997	0.451942	0.154559	0.483637	-0.213659	sp.P43353.AL3B1_HUMAN	0.776412	0.0523418	0.74859	0.0490289	0.987187	0.00331292	Buffering	Anti-Scaling	Buffering	Buffering
300	ALDH4A1	ALDH4A1	0.210337	0.187662	0.716141	0.045263	0.409232	0.142399	sp.P30038.AL4A1_HUMAN	0.120196	0.259238	0.0104175	0.279485	0.909577	-0.0202475	Buffering	Buffering	Scaling	Anti-Scaling
301	ALDH5A1	ALDH5A1	0.328415	0.213869	0.000282379	-0.499454	0.00299648	0.713323	sp.P51649.2.SSDH_HUMAN	0.205586	0.237311	0.00885615	-0.365167	0.00542757	0.602478	Buffering	Scaling	Buffering	Scaling
302	ALDH6A1	ALDH6A1	0.275642	0.169465	1.98078e-05	-0.432058	0.000419347	0.601522	sp.Q02252.MMSA_HUMAN	0.00235505	0.485706	0.0140653	-0.26867	2.15453e-05	0.754376	Buffering	Scaling	Scaling	Scaling
303	ALDH7A1	ALDH7A1	0.0141173	0.668252	0.0956022	-0.438566	0.000867925	1.10682	sp.P49419.AL7A1_HUMAN	0.0141941	0.448943	0.0726666	-0.299486	0.000864475	0.74843	Scaling	Scaling	Scaling	Scaling
304	ALDH7A1	ALDH7A1	0.0141173	0.668252	0.0956022	-0.438566	0.000867925	1.10682	sp.P49419.2.AL7A1_HUMAN	0.000816194	0.689767	0.868132	0.0412943	0.0219321	0.648473	Scaling	Scaling	Scaling	Buffering
305	ALDH9A1	ALDH9A1	0.00189081	0.196152	0.00224131	-0.372261	1.82651e-05	0.568413	sp.P49189.AL9A1_HUMAN	0.00293934	0.20923	0.0106295	-0.225873	2.86307e-05	0.435103	Buffering	Scaling	Buffering	Buffering
306	ALDOA	ALDOA	0.0538253	0.234491	0.319709	-0.0735504	0.0185755	0.308041	sp.P04075.2.ALDOA_HUMAN	0.000199912	0.520315	0.0591487	-0.138456	9.13318e-06	0.65877	Buffering	Buffering	Scaling	Buffering
307	ALDOB	ALDOB	0.313289	-0.0408237	0.0623195	-0.0541939	0.708717	0.0133702	sp.P05062.ALDOB_HUMAN	0.561928	-0.212419	0.0293137	-0.637388	0.288412	0.424968	Buffering	Buffering	Anti-Scaling	Scaling
308	ALDOC	ALDOC	0.310584	-0.264729	0.205561	-0.349279	0.804979	0.0845496	sp.P09972.ALDOC_HUMAN	0.164513	-0.244416	0.0645448	-0.330978	0.701686	0.0865617	Anti-Scaling	Scaling	Anti-Scaling	Scaling
309	ALG1	ALG1	0.00149342	0.370655	2.2746e-09	-0.371398	3.97733e-08	0.742053	sp.Q9BT22.ALG1_HUMAN	0.10362	0.176503	0.00258849	-0.210537	0.00091474	0.38704	Scaling	Scaling	Buffering	Buffering
310	ALG10	ALG10	4.13835e-07	0.415962	0.384971	-0.0786607	5.9645e-06	0.494622	sp.Q5BKT4.AG10A_HUMAN	0.0795667	0.220372	0.928091	-0.00901302	0.107785	0.229385	Scaling	Buffering	Buffering	Buffering
311	ALG11	ALG11	0.00763334	0.266881	1.11048e-11	-0.415879	5.37867e-09	0.68276	sp.Q2TAA5.ALG11_HUMAN	0.000426852	0.531142	9.25578e-05	-0.27739	6.76308e-07	0.808532	Scaling	Scaling	Scaling	Scaling
312	ALG12	ALG12	0.000246108	0.6354	1.10026e-07	-0.345085	6.72272e-07	0.980485	sp.Q9BV10.ALG12_HUMAN	0.00480071	0.588513	0.0331013	-0.168774	0.000549696	0.757287	Scaling	Scaling	Scaling	Buffering
313	ALG14	ALG14	0.461584	0.0924482	0.1782	-0.118078	0.136374	0.210526	sp.Q96F25.ALG14_HUMAN	0.721637	-0.0546816	0.110277	-0.165587	0.509772	0.110905	Buffering	Buffering	Buffering	Buffering
314	ALG2	ALG2	4.38955e-05	0.346999	2.02844e-09	-0.421587	3.81352e-13	0.768587	sp.Q9H553.ALG2_HUMAN	0.00773769	0.316842	0.00241378	-0.226158	2.52858e-05	0.543	Scaling	Scaling	Scaling	Buffering
315	ALG3	ALG3	2.60508e-06	0.35029	0.00359438	-0.31179	1.73923e-07	0.66208	sp.Q92685.ALG3_HUMAN	0.0215397	0.197563	0.185578	-0.12299	0.00231831	0.320553	Scaling	Scaling	Buffering	Buffering
316	ALG5	ALG5	0.00465198	0.391763	3.77476e-12	-0.436935	1.68416e-07	0.828698	sp.Q9Y673.ALG5_HUMAN	0.00239664	0.446819	4.58383e-05	-0.258336	9.13049e-06	0.705155	Scaling	Scaling	Scaling	Scaling
317	ALG6	ALG6	0.000531059	0.349745	0.0046569	-0.214765	1.63536e-06	0.56451	sp.Q9Y672.ALG6_HUMAN	0.032206	0.300236	0.061086	-0.147758	0.00348887	0.447995	Scaling	Buffering	Scaling	Buffering
318	ALG8	ALG8	0.00255924	0.218743	0.359248	-0.0974364	0.00793743	0.31618	sp.Q9BVK2.ALG8_HUMAN	0.0402927	0.274187	0.527523	0.0706621	0.207627	0.203525	Buffering	Buffering	Scaling	Buffering
319	ALG9	ALG9	0.0364008	0.157193	8.82067e-09	-0.428999	4.39062e-10	0.586193	sp.Q9H6U8.3.ALG9_HUMAN	0.00163525	0.312326	0.0259726	-0.174437	8.46059e-06	0.486763	Buffering	Scaling	Scaling	Buffering
320	ALKBH1	ALKBH1	2.74148e-05	0.30117	3.23385e-11	-0.367246	6.30934e-14	0.668417	sp.Q13686.ALKB1_HUMAN	0.0642764	0.147418	2.90327e-07	-0.313381	5.04869e-07	0.460799	Scaling	Scaling	Buffering	Scaling
321	ALKBH2	ALKBH2	0.0467507	0.242686	0.00137039	-0.353519	0.000107732	0.596206	sp.Q6NS38.ALKB2_HUMAN	0.0260644	0.380079	0.0130001	-0.28567	0.00070944	0.665749	Buffering	Scaling	Scaling	Scaling
322	ALKBH3	ALKBH3	3.89216e-05	0.502224	0.11166	-0.182542	1.44533e-06	0.684766	sp.Q96Q83.ALKB3_HUMAN	0.467659	0.119987	0.00183947	-0.381703	0.00654671	0.50169	Scaling	Buffering	Buffering	Scaling
323	ALKBH4	ALKBH4	1.25339e-09	0.338424	1.21856e-05	-0.354543	1.36467e-13	0.692967	sp.Q9NXW9.ALKB4_HUMAN	0.00258389	0.22781	0.00115359	-0.327388	2.51631e-07	0.555198	Scaling	Scaling	Buffering	Scaling
324	ALKBH5	ALKBH5	0.00119103	0.324606	8.00386e-07	-0.345586	1.1091e-08	0.670192	sp.Q6P6C2.ALKB5_HUMAN	0.0728869	0.18214	0.000515672	-0.23111	0.000191801	0.41325	Scaling	Scaling	Buffering	Buffering
325	ALKBH6	ALKBH6	0.000180638	0.299226	0.0282241	-0.164028	1.85783e-06	0.463254	sp.Q3KRA9.2.ALKB6_HUMAN	0.672839	-0.0589944	0.0582766	-0.254483	0.224282	0.195489	Scaling	Buffering	Buffering	Scaling
326	ALKBH7	ALKBH7	0.0541887	0.312455	2.83628e-12	-0.460552	5.11864e-05	0.773007	sp.Q9BT30.ALKB7_HUMAN	0.194999	0.205132	0.0897036	-0.129886	0.041574	0.335018	Scaling	Scaling	Buffering	Buffering
327	ALKBH8	ALKBH8	0.00262007	0.28911	1.17858e-06	-0.389485	1.54745e-09	0.678595	sp.Q96BT7.4.ALKB8_HUMAN	0.525169	0.0695965	0.00173583	-0.28938	0.00390413	0.358977	Scaling	Scaling	Buffering	Scaling
328	ALMS1	ALMS1	0.0788914	0.189684	0.00636619	-0.282391	0.000771916	0.472075	sp.Q8TCU4.ALMS1_HUMAN	0.142935	0.185178	0.742476	-0.0329558	0.131061	0.218134	Buffering	Scaling	Buffering	Buffering
329	ALOX5	ALOX5	0.427194	-0.312419	0.0388739	-0.412155	0.802893	0.0997357	sp.P09917.LOX5_HUMAN	0.77148	-0.0613118	0.298938	-0.19605	0.564268	0.134738	Anti-Scaling	Scaling	Buffering	Buffering
330	ALOX5AP	ALOX5AP	0.142664	0.733292	0.050832	-0.309249	0.036979	1.04254	sp.P20292.AL5AP_HUMAN	0.00971064	1.99642	0.738693	-0.12931	0.0062046	2.12573	Scaling	Scaling	Scaling	Buffering
331	ALPL	ALPL	0.0125082	0.942662	0.166894	-0.161217	0.00414901	1.10388	sp.P05186.PPBT_HUMAN	0.0318856	1.13853	0.225803	-0.244396	0.0107784	1.38293	Scaling	Buffering	Scaling	Buffering
332	ALPP	ALPP	0.062738	-0.483286	0.060481	0.636284	0.00470818	-1.11957	sp.P05187.PPB1_HUMAN	0.355942	-0.334938	0.753515	0.100646	0.327108	-0.435585	Anti-Scaling	Anti-Scaling	Anti-Scaling	Anti-Scaling
333	ALS2	ALS2	9.37762e-05	0.497401	0.150755	-0.117792	8.60222e-06	0.615193	sp.Q96Q42.ALS2_HUMAN	0.6764	-0.041683	0.00511177	-0.285107	0.0578311	0.243424	Scaling	Buffering	Buffering	Scaling
334	ALYREF	ALYREF	0.00164407	0.30232	0.0574092	-0.180956	0.000103717	0.483276	sp.Q86V81.THOC4_HUMAN	0.209587	0.0896495	0.406246	-0.0671423	0.111027	0.156792	Scaling	Buffering	Buffering	Buffering
335	AMACR	AMACR	0.00970879	0.277131	0.0946115	-0.395443	0.00628958	0.672574	sp.Q9UHK6.5.AMACR_HUMAN	0.170097	0.148844	0.506425	-0.154312	0.194171	0.303156	Scaling	Scaling	Buffering	Buffering
336	AMBP	AMBP	0.607039	-0.133278	0.142544	-0.233221	0.697033	0.0999428	sp.P02760.AMBP_HUMAN	0.231171	0.385117	0.662361	0.144695	0.533332	0.240423	Anti-Scaling	Buffering	Scaling	Anti-Scaling
337	AMBRA1	AMBRA1	0.0151953	0.236133	0.00944993	-0.199747	0.000162884	0.435881	sp.Q9C0C7.5.AMRA1_HUMAN	0.0864572	0.108705	0.0597344	-0.0916848	0.00487362	0.20039	Buffering	Buffering	Buffering	Buffering
338	AMDHD2	AMDHD2	0.0939635	0.245296	0.00344288	-0.28544	0.00140941	0.530737	sp.Q9Y303.3.NAGA_HUMAN	0.461489	0.128766	0.201	-0.123049	0.172268	0.251815	Buffering	Scaling	Buffering	Buffering
339	AMER2	AMER2	0.662946	-0.0383121	0.0718923	-0.0938887	0.440917	0.0555766	sp.Q8N7J2.AMER2_HUMAN	0.455809	0.22229	0.0578358	-0.702567	0.0127805	0.924856	Buffering	Buffering	Buffering	Scaling
340	AMFR	AMFR	0.00389343	0.347571	1.58029e-07	-0.419386	7.01552e-08	0.766958	sp.Q9UKV5.AMFR_HUMAN	0.754956	0.0257574	0.031567	-0.145033	0.0739473	0.17079	Scaling	Scaling	Buffering	Buffering
341	AMIGO2	AMIGO2	0.450399	0.334156	0.990897	-0.00380935	0.511144	0.337966	sp.Q86SJ2.AMGO2_HUMAN	0.576286	0.184655	0.265023	-0.264848	0.239701	0.449503	Scaling	Buffering	Buffering	Scaling
342	AMMECR1L	AMMECR1L	0.0598877	0.203003	0.0366801	-0.143846	0.00463452	0.346849	sp.Q6DCA0.AMERL_HUMAN	0.688335	0.113315	0.107444	-0.21808	0.276304	0.331395	Buffering	Buffering	Buffering	Buffering
343	AMN1	AMN1	0.0619078	0.273653	0.425996	-0.0929496	0.029385	0.366602	sp.Q8IY45.AMN1_HUMAN	0.707397	0.0733126	0.387132	0.163435	0.707951	-0.0901227	Scaling	Buffering	Buffering	Anti-Scaling
344	AMOTL1	AMOTL1	0.128986	0.401401	0.205024	0.240987	0.563736	0.160414	sp.Q8IY63.AMOL1_HUMAN	0.008625	0.439105	0.624791	0.0587696	0.0293184	0.380335	Scaling	Anti-Scaling	Scaling	Buffering
345	AMOTL2	AMOTL2	0.00551804	0.664182	0.444881	0.24764	0.243393	0.416543	sp.Q9Y2J4.2.AMOL2_HUMAN	0.026601	0.276995	0.64503	0.0693483	0.230271	0.207646	Scaling	Anti-Scaling	Scaling	Buffering
346	AMPD2	AMPD2	0.000349748	0.486537	0.000159302	-0.390414	6.97559e-08	0.876951	sp.Q01433.AMPD2_HUMAN	0.696685	0.0562197	0.000131835	-0.369861	0.00902496	0.42608	Scaling	Scaling	Buffering	Scaling
347	AMPD3	AMPD3	0.0107802	0.534439	0.0297238	-0.245041	0.000428199	0.779481	sp.Q01432.4.AMPD3_HUMAN	0.0629404	0.558985	0.0613736	-0.378624	0.00377124	0.937609	Scaling	Buffering	Scaling	Scaling
348	AMPH	AMPH	0.0161346	0.370832	0.768067	0.0557654	0.141109	0.315067	sp.P49418.AMPH_HUMAN	0.256085	0.167479	0.618953	0.12294	0.86164	0.044539	Scaling	Buffering	Buffering	Anti-Scaling
349	AMZ2	AMZ2	0.038917	0.255067	0.00095517	-0.322571	8.67308e-05	0.577638	sp.Q86W34.AMZ2_HUMAN	0.0147587	0.308492	0.119406	-0.225834	0.00322888	0.534325	Scaling	Scaling	Scaling	Buffering
350	ANAPC1	ANAPC1	0.112796	0.139464	0.00670988	-0.223203	0.00119555	0.362667	sp.Q9H1A4.APC1_HUMAN	0.326208	0.0631117	0.641173	0.0230264	0.584477	0.0400853	Buffering	Buffering	Buffering	Buffering
351	ANAPC10	ANAPC10	0.564052	0.0970103	4.6523e-09	-0.29106	0.0357909	0.388071	sp.Q9UM13.APC10_HUMAN	0.701147	0.0597614	0.105932	0.0924991	0.834294	-0.0327377	Buffering	Scaling	Buffering	Buffering
352	ANAPC11	ANAPC11	7.0223e-06	0.337374	0.146527	-0.118514	6.5895e-06	0.455889	sp.Q9NYG5.APC11_HUMAN	0.0163408	0.237519	0.977117	0.00280194	0.0572399	0.234717	Scaling	Buffering	Buffering	Buffering
353	ANAPC16	ANAPC16	0.00272435	0.36697	3.02584e-06	-0.4365	1.68602e-07	0.803469	sp.Q96DE5.APC16_HUMAN	0.708455	-0.053697	0.484704	-0.0501005	0.980911	-0.00359651	Scaling	Scaling	Buffering	Buffering
354	ANAPC2	ANAPC2	0.0906222	0.143467	6.88377e-06	-0.332211	4.77362e-06	0.475679	sp.Q9UJX6.ANC2_HUMAN	0.179151	0.0765701	0.0941614	-0.0744608	0.0148433	0.151031	Buffering	Scaling	Buffering	Buffering
355	ANAPC4	ANAPC4	0.137721	0.218906	7.23347e-14	-0.439971	0.000187084	0.658877	sp.Q9UJX5.APC4_HUMAN	0.709846	0.0425502	0.0479094	-0.084692	0.270509	0.127242	Buffering	Scaling	Buffering	Buffering
356	ANAPC5	ANAPC5	0.135684	0.134598	0.000518663	-0.234649	0.000638837	0.369247	tr.F5H0F9.F5H0F9_HUMAN	0.482286	-0.0485467	0.67468	0.0252923	0.368588	-0.073839	Buffering	Buffering	Buffering	Buffering
357	ANAPC7	ANAPC7	0.0922386	0.154949	0.0584884	-0.157738	0.0078807	0.312687	sp.Q9UJX3.APC7_HUMAN	0.471383	0.0425345	0.93827	-0.00440162	0.532508	0.0469362	Buffering	Buffering	Buffering	Buffering
358	ANGEL1	ANGEL1	0.00726868	0.319136	2.74614e-10	-0.554983	1.46545e-09	0.874119	sp.Q9UNK9.ANGE1_HUMAN	0.377206	0.136165	0.128445	-0.221569	0.0631324	0.357734	Scaling	Scaling	Buffering	Buffering
359	ANGEL2	ANGEL2	4.29997e-05	0.28782	1.03248e-05	-0.504608	1.79351e-09	0.792428	sp.Q5VTE6.ANGE2_HUMAN	1.82276e-05	0.303665	0.147471	-0.157759	0.000200053	0.461423	Scaling	Scaling	Scaling	Buffering
360	ANGPTL2	ANGPTL2	0.126309	0.507046	0.912588	-0.0220734	0.137622	0.529119	sp.Q9UKU9.ANGL2_HUMAN	0.333584	0.319432	0.467189	0.241665	0.837086	0.0777669	Scaling	Buffering	Scaling	Anti-Scaling
361	ANK1	ANK1	0.0659243	0.804907	0.172776	-0.234445	0.0170642	1.03935	sp.P16157.14.ANK1_HUMAN	0.752338	0.0867155	0.590231	-0.0691189	0.56271	0.155834	Scaling	Buffering	Buffering	Buffering
362	ANK2	ANK2	0.357296	-0.27238	0.00580875	-0.431126	0.588288	0.158746	tr.I6L894.I6L894_HUMAN	0.135724	-0.629357	0.42113	-0.10502	0.207911	-0.524338	Anti-Scaling	Scaling	Anti-Scaling	Buffering
363	ANK3	ANK3	0.0858826	-0.705727	0.771468	-0.0560843	0.123805	-0.649643	sp.Q12955.ANK3_HUMAN	0.154069	-0.353711	0.376255	-0.10226	0.3164	-0.251451	Anti-Scaling	Buffering	Anti-Scaling	Buffering
364	ANKEF1	ANKEF1	0.00102993	0.442591	0.31926	-0.109327	5.10382e-05	0.551917	sp.Q9NU02.ANKE1_HUMAN	0.611987	0.118692	0.929427	-0.0221395	0.615735	0.140831	Scaling	Buffering	Buffering	Buffering
365	ANKFY1	ANKFY1	0.132292	0.152142	6.6823e-16	-0.50154	5.78742e-08	0.653683	sp.Q9P2R3.ANFY1_HUMAN	0.144354	0.144481	5.65266e-05	-0.237792	0.000339273	0.382272	Buffering	Scaling	Buffering	Buffering
366	ANKH	ANKH	0.0131464	0.443442	0.639033	-0.119671	0.0363845	0.563113	sp.Q9HCJ1.ANKH_HUMAN	0.275392	0.194095	0.0205292	-0.415526	0.00148141	0.609621	Scaling	Buffering	Buffering	Scaling
367	ANKHD1	ANKHD1	0.00719706	0.255166	0.00929439	-0.176881	9.05348e-05	0.432046	sp.Q8IWZ3.2.ANKH1_HUMAN	0.0459256	0.38024	0.159535	-0.173018	0.00882134	0.553257	Scaling	Buffering	Scaling	Buffering
368	ANKHD1	ANKHD1	0.00719706	0.255166	0.00929439	-0.176881	9.05348e-05	0.432046	sp.Q8IWZ3.6.ANKH1_HUMAN	0.0621463	0.153136	3.82148e-05	-0.230483	5.5622e-05	0.383619	Scaling	Buffering	Buffering	Buffering
369	ANKIB1	ANKIB1	2.07899e-08	0.399868	0.100954	-0.135518	1.33274e-08	0.535385	sp.Q9P2G1.AKIB1_HUMAN	0.0018396	0.206405	0.229908	-0.0905908	0.00039766	0.296996	Scaling	Buffering	Buffering	Buffering
370	ANKK1	ANKK1	0.734628	0.0152814	0.217045	-0.0384335	0.240853	0.0537149	sp.Q8NFD2.ANKK1_HUMAN	0.493444	0.147968	0.107864	-0.292126	0.0622125	0.440094	Buffering	Buffering	Buffering	Scaling
371	ANKLE2	ANKLE2	0.0616511	0.224685	0.000770293	-0.28443	0.000359906	0.509115	sp.Q86XL3.ANKL2_HUMAN	0.0138129	0.20127	0.0868027	-0.102995	0.00130818	0.304266	Buffering	Scaling	Buffering	Buffering
372	ANKMY2	ANKMY2	2.06944e-07	0.394646	0.000759205	-0.466537	2.17631e-08	0.861183	sp.Q8IV38.ANKY2_HUMAN	0.000308169	0.27181	0.00596287	-0.332904	2.77381e-06	0.604714	Scaling	Scaling	Scaling	Scaling
373	ANKRD10	ANKRD10	2.2615e-06	0.630276	2.29291e-08	-0.534369	8.38305e-14	1.16465	sp.Q9NXR5.ANR10_HUMAN	0.162293	0.283405	0.0122251	-0.293943	0.00656029	0.577348	Scaling	Scaling	Scaling	Scaling
374	ANKRD11	ANKRD11	0.0511166	0.216398	9.7943e-10	-0.482087	2.51793e-07	0.698485	sp.Q6UB99.ANR11_HUMAN	0.556227	0.0493406	0.00245556	-0.182918	0.0132461	0.232258	Buffering	Scaling	Buffering	Buffering
375	ANKRD12	ANKRD12	2.06866e-05	0.432663	1.26518e-06	-0.343774	1.3219e-11	0.776437	sp.Q6UB98.ANR12_HUMAN	0.0012183	0.378956	0.000550919	-0.278609	5.6924e-07	0.657566	Scaling	Scaling	Scaling	Scaling
376	ANKRD13A	ANKRD13A	0.712174	0.0598113	0.819113	-0.0352884	0.646212	0.0950997	sp.Q8IZ07.AN13A_HUMAN	0.427013	0.120195	0.390489	-0.0984532	0.21644	0.218648	Buffering	Buffering	Buffering	Buffering
377	ANKRD13D	ANKRD13D	0.101624	0.149902	0.629923	0.0445735	0.357997	0.105329	sp.Q6ZTN6.3.AN13D_HUMAN	0.342406	0.126804	0.0974641	0.179926	0.714223	-0.0531224	Buffering	Buffering	Buffering	Anti-Scaling
378	ANKRD16	ANKRD16	0.000941363	0.343796	2.8515e-11	-0.40319	1.69768e-09	0.746986	sp.Q6P6B7.ANR16_HUMAN	0.299773	0.202285	6.3528e-05	-0.424684	0.00352161	0.626969	Scaling	Scaling	Buffering	Scaling
379	ANKRD17	ANKRD17	0.339662	0.172947	1.07083e-09	-0.342508	0.0118058	0.515455	sp.O75179.ANR17_HUMAN	0.287207	0.145602	3.87647e-07	-0.242991	0.011455	0.388593	Buffering	Scaling	Buffering	Buffering
380	ANKRD2	ANKRD2	0.491225	0.206198	0.196989	-0.168897	0.224708	0.375095	sp.Q9GZV1.ANKR2_HUMAN	0.359448	0.508741	0.146787	-0.339616	0.142475	0.848357	Buffering	Buffering	Scaling	Scaling
381	ANKRD22	ANKRD22	0.941523	0.0304373	0.654087	-0.0798129	0.794945	0.11025	sp.Q5VYY1.ANR22_HUMAN	0.616344	0.159363	0.41791	-0.20457	0.310448	0.363933	Buffering	Buffering	Buffering	Buffering
382	ANKRD26	ANKRD26	8.5128e-05	0.423161	0.000188865	-0.228972	3.56915e-08	0.652133	sp.Q9UPS8.3.ANR26_HUMAN	0.0208415	0.258176	0.356674	-0.0750844	0.00503722	0.333261	Scaling	Buffering	Scaling	Buffering
383	ANKRD27	ANKRD27	0.0266827	0.236328	0.000501702	-0.307493	1.36398e-05	0.543822	sp.Q96NW4.ANR27_HUMAN	0.548413	0.0576024	0.00139039	-0.237639	0.00622727	0.295241	Buffering	Scaling	Buffering	Buffering
384	ANKRD28	ANKRD28	0.0380941	0.479915	2.3063e-07	-0.479303	0.000321117	0.959218	sp.O15084.1.ANR28_HUMAN	0.00145129	0.412039	3.59064e-06	-0.303147	2.69806e-06	0.715187	Scaling	Scaling	Scaling	Scaling
385	ANKRD30A	ANKRD30A	0.337114	-0.075928	0.13415	-0.0875337	0.864494	0.0116057	sp.Q9BXX3.AN30A_HUMAN	0.529337	0.0828107	0.565647	0.0501496	0.80938	0.032661	Buffering	Buffering	Buffering	Buffering
386	ANKRD31	ANKRD31	0.376555	0.0406389	0.154732	-0.0289899	0.13799	0.0696288	sp.Q8N7Z5.ANR31_HUMAN	0.494111	0.156732	0.497391	0.12975	0.910221	0.0269823	Buffering	Buffering	Buffering	Anti-Scaling
387	ANKRD35	ANKRD35	0.781334	-0.0202858	0.00453755	-0.153841	0.0717751	0.133555	sp.Q8N283.ANR35_HUMAN	0.944963	0.0069896	0.380477	0.195058	0.412137	-0.188069	Buffering	Buffering	Buffering	Anti-Scaling
388	ANKRD39	ANKRD39	0.0502556	0.221375	0.0611986	-0.189574	0.00372294	0.41095	sp.Q53RE8.ANR39_HUMAN	0.718805	-0.0903051	0.454518	-0.139588	0.866377	0.049283	Buffering	Buffering	Buffering	Buffering
389	ANKRD40	ANKRD40	2.22316e-07	0.43328	0.0639717	-0.204538	1.60565e-06	0.637818	sp.Q6AI12.ANR40_HUMAN	1.66707e-05	0.45165	0.553311	-0.06924	0.000357286	0.52089	Scaling	Buffering	Scaling	Buffering
390	ANKRD44	ANKRD44	0.0905941	0.360676	0.148629	-0.19926	0.0169043	0.559936	sp.Q8N8A2.2.ANR44_HUMAN	0.210503	0.269971	0.0259522	-0.363496	0.010454	0.633467	Scaling	Buffering	Scaling	Scaling
391	ANKRD46	ANKRD46	0.000129398	0.317322	8.10376e-06	-0.480896	1.83828e-10	0.798218	sp.Q86W74.ANR46_HUMAN	0.846053	0.0207783	1.85655e-06	-0.595598	1.08489e-05	0.616376	Scaling	Scaling	Buffering	Scaling
392	ANKRD49	ANKRD49	0.00226967	0.301547	1.79254e-09	-0.50297	3.32134e-11	0.804518	sp.Q8WVL7.ANR49_HUMAN	0.374227	0.129533	0.00710383	-0.248387	0.0179115	0.37792	Scaling	Scaling	Buffering	Buffering
393	ANKRD50	ANKRD50	0.565309	0.171724	0.0864779	-0.160412	0.275957	0.332137	sp.Q9ULJ7.ANR50_HUMAN	0.254861	0.277484	0.177531	-0.113471	0.119177	0.390956	Buffering	Buffering	Scaling	Buffering
394	ANKRD52	ANKRD52	0.688578	0.0527859	0.117982	-0.153154	0.179429	0.20594	sp.Q8NB46.ANR52_HUMAN	0.0755662	0.240691	0.462022	-0.0798639	0.0462099	0.320555	Buffering	Buffering	Buffering	Buffering
395	ANKRD54	ANKRD54	0.000767995	0.533592	4.37122e-16	-0.553344	3.0484e-08	1.08694	sp.Q6NXT1.ANR54_HUMAN	0.193238	0.204162	3.43024e-09	-0.365974	0.0010108	0.570136	Scaling	Scaling	Buffering	Scaling
396	ANKS1A	ANKS1A	0.198454	0.179002	0.183381	-0.177603	0.0485184	0.356605	sp.Q92625.ANS1A_HUMAN	0.285403	0.108975	0.0577923	-0.179272	0.0251268	0.288247	Buffering	Buffering	Buffering	Buffering
397	ANKS1B	ANKS1B	0.384868	0.179418	0.0166237	-0.275887	0.0395418	0.455305	sp.Q7Z6G8.ANS1B_HUMAN	0.6741	-0.0742107	0.107993	0.267207	0.111532	-0.341418	Buffering	Scaling	Buffering	Anti-Scaling
398	ANKS3	ANKS3	5.54373e-05	0.458191	1.32102e-05	-0.316361	3.99486e-09	0.774552	sp.Q6ZW76.ANKS3_HUMAN	0.0993714	0.512039	0.596394	-0.122174	0.0765042	0.634213	Scaling	Scaling	Scaling	Buffering
399	ANKS4B	ANKS4B	0.0298523	0.708495	0.289241	-0.0997691	0.0146283	0.808264	sp.Q8N8V4.ANS4B_HUMAN	0.216741	0.834404	0.962488	0.0192459	0.270069	0.815158	Scaling	Buffering	Scaling	Buffering
400	ANKS6	ANKS6	0.00592575	0.410408	0.0010853	-0.356447	7.06515e-06	0.766855	sp.Q68DC2.4.ANKS6_HUMAN	0.0553939	0.404969	0.618604	-0.0637467	0.0350804	0.468716	Scaling	Scaling	Scaling	Buffering
401	ANKZF1	ANKZF1	0.0395536	0.215981	0.000538103	-0.335584	3.70554e-05	0.551565	sp.Q9H8Y5.ANKZ1_HUMAN	0.266167	0.0908869	0.335197	-0.0672084	0.112185	0.158095	Buffering	Scaling	Buffering	Buffering
402	ANLN	ANLN	1.42897e-05	0.529818	0.346548	-0.220496	0.00220009	0.750314	sp.Q9NQW6.ANLN_HUMAN	4.14308e-06	0.458287	0.384133	-0.130394	0.000229532	0.588681	Scaling	Buffering	Scaling	Buffering
403	ANO1	ANO1	0.0377615	0.752774	0.0405841	0.589317	0.690734	0.163457	sp.Q5XXA6.ANO1_HUMAN	0.141507	0.403531	0.745623	0.0792656	0.309125	0.324265	Scaling	Anti-Scaling	Scaling	Buffering
404	ANO1	ANO1	0.0377615	0.752774	0.0405841	0.589317	0.690734	0.163457	tr.H0YDD9.H0YDD9_HUMAN	0.137656	0.578132	0.547692	0.244061	0.47483	0.334071	Scaling	Anti-Scaling	Scaling	Anti-Scaling
405	ANO10	ANO10	0.012732	0.575777	0.00506976	-0.275029	0.000634278	0.850806	sp.Q9NW15.ANO10_HUMAN	0.382905	0.239477	0.366828	-0.0794716	0.25025	0.318949	Scaling	Scaling	Buffering	Buffering
406	ANO2	ANO2	0.735713	-0.0355169	0.187612	0.199082	0.150541	-0.234599	sp.Q9NQ90.ANO2_HUMAN	0.333621	0.18341	0.515184	0.154533	0.911442	0.0288764	Buffering	Anti-Scaling	Buffering	Anti-Scaling
407	ANO6	ANO6	0.0260186	0.347002	0.63237	-0.0446571	0.0182252	0.39166	sp.Q4KMQ2.2.ANO6_HUMAN	0.037318	0.374297	0.879538	-0.0169884	0.0448963	0.391285	Scaling	Buffering	Scaling	Buffering
408	ANO9	ANO9	0.264111	0.401202	0.873204	-0.0336851	0.24912	0.434887	sp.A1A5B4.ANO9_HUMAN	0.961082	-0.0115705	0.631052	-0.135141	0.696788	0.123571	Scaling	Buffering	Buffering	Buffering
409	ANP32A	ANP32A	0.000696061	0.356216	1.76211e-06	-0.400303	2.4096e-09	0.756519	sp.P39687.AN32A_HUMAN	0.329171	0.192467	4.21904e-05	-0.382385	0.00769041	0.574851	Scaling	Scaling	Buffering	Scaling
410	ANP32B	ANP32B	0.00627698	0.223341	4.30401e-11	-0.441371	6.41564e-11	0.664712	sp.Q92688.AN32B_HUMAN	0.0632933	0.204803	0.000161558	-0.268302	0.000108549	0.473105	Buffering	Scaling	Buffering	Scaling
411	ANP32E	ANP32E	0.607763	0.0598507	0.000949814	-0.458554	0.00163605	0.518405	sp.Q9BTT0.AN32E_HUMAN	0.366428	0.105689	0.0397026	-0.351214	0.0184357	0.456903	Buffering	Scaling	Buffering	Scaling
412	ANPEP	ANPEP	0.390691	-0.434684	0.871274	-0.0462138	0.463937	-0.38847	sp.P15144.AMPN_HUMAN	0.858044	0.0740618	0.206674	0.273835	0.651192	-0.199774	Anti-Scaling	Buffering	Buffering	Anti-Scaling
413	ANTXR1	ANTXR1	0.0429554	0.690299	0.0369096	0.687652	0.995041	0.00264756	sp.Q9H6X2.ANTR1_HUMAN	0.00718235	0.776926	0.0340039	0.501861	0.405881	0.275065	Scaling	Anti-Scaling	Scaling	Anti-Scaling
414	ANTXR2	ANTXR2	0.354959	0.64721	0.147752	-0.280884	0.193061	0.928095	sp.P58335.4.ANTR2_HUMAN	0.43575	0.40439	0.429981	-0.117795	0.319949	0.522184	Scaling	Scaling	Scaling	Buffering
415	ANXA1	ANXA1	0.000174614	1.48971	0.813135	0.0719571	0.000607502	1.41775	sp.P04083.ANXA1_HUMAN	0.000437554	0.801908	0.286479	-0.17688	7.49318e-05	0.978788	Scaling	Buffering	Scaling	Buffering
416	ANXA11	ANXA11	0.00617091	0.486471	0.00166904	-0.312814	6.21424e-05	0.799285	sp.P50995.ANX11_HUMAN	0.0296443	0.385237	0.00295081	-0.245337	0.00113356	0.630574	Scaling	Scaling	Scaling	Buffering
417	ANXA13	ANXA13	0.443395	0.12129	0.32369	-0.151595	0.143208	0.272885	sp.P27216.2.ANX13_HUMAN	0.217659	0.425834	0.892177	-0.0638601	0.366605	0.489694	Buffering	Buffering	Scaling	Buffering
418	ANXA2	ANXA2	0.0933386	0.717097	0.00351462	0.516304	0.626459	0.200792	sp.P07355.2.ANXA2_HUMAN	0.0845457	0.388689	0.00679254	0.294144	0.673389	0.094545	Scaling	Anti-Scaling	Scaling	Anti-Scaling
419	ANXA3	ANXA3	0.324104	-0.968578	0.0622353	0.553463	0.131807	-1.52204	sp.P12429.ANXA3_HUMAN	0.475674	-0.418271	0.834184	0.0350906	0.440847	-0.453362	Anti-Scaling	Anti-Scaling	Anti-Scaling	Buffering
420	ANXA4	ANXA4	0.00238885	0.676296	0.883285	0.0273465	0.0118972	0.64895	sp.P09525.ANXA4_HUMAN	0.310421	0.182574	0.828357	-0.0325558	0.320143	0.21513	Scaling	Buffering	Buffering	Buffering
421	ANXA5	ANXA5	0.271573	0.424344	0.911915	0.015477	0.283998	0.408867	sp.P08758.ANXA5_HUMAN	0.306282	0.409021	0.038972	-0.206697	0.134311	0.615718	Scaling	Buffering	Scaling	Buffering
422	ANXA6	ANXA6	0.0129879	0.812162	0.102397	-0.465049	0.000762612	1.27721	tr.A6NN80.A6NN80_HUMAN	0.240584	0.588846	0.884628	0.0362057	0.275072	0.55264	Scaling	Scaling	Scaling	Buffering
423	ANXA6	ANXA6	0.0129879	0.812162	0.102397	-0.465049	0.000762612	1.27721	sp.P08133.ANXA6_HUMAN	0.0295173	0.498799	0.16206	-0.251547	0.00431738	0.750345	Scaling	Scaling	Scaling	Scaling
424	ANXA7	ANXA7	0.328908	0.113544	0.000110678	-0.298495	0.00244682	0.412039	sp.P20073.ANXA7_HUMAN	0.130909	0.186992	0.000382725	-0.269689	0.00130848	0.456682	Buffering	Scaling	Buffering	Scaling
425	ANXA8	ANXA8	0.295626	-0.552793	0.179573	0.419046	0.0898773	-0.971839	sp.P13928.ANXA8_HUMAN	0.451591	-0.224089	0.243354	0.212262	0.173441	-0.436351	Anti-Scaling	Anti-Scaling	Anti-Scaling	Anti-Scaling
426	ANXA9	ANXA9	0.034338	0.429676	0.445397	-0.174271	0.0302969	0.603947	sp.O76027.ANXA9_HUMAN	0.881835	0.0279358	0.155296	-0.317875	0.174925	0.345811	Scaling	Buffering	Buffering	Scaling
427	AOC1	AOC1	0.226621	0.208264	0.635671	-0.0849798	0.173925	0.293244	sp.P19801.2.AOC1_HUMAN	0.733208	0.140335	0.515753	0.356083	0.742552	-0.215748	Buffering	Buffering	Buffering	Anti-Scaling
428	AP1AR	AP1AR	0.987227	0.00342234	1.20682e-09	-0.369649	0.100339	0.373071	sp.Q63HQ0.AP1AR_HUMAN	0.936824	0.0181532	0.00217558	-0.206964	0.3395	0.225118	Buffering	Scaling	Buffering	Buffering
429	AP1B1	AP1B1	0.00112033	0.375475	0.000318483	-0.245632	2.21666e-06	0.621107	sp.Q10567.AP1B1_HUMAN	0.15864	0.122547	0.0187262	-0.114082	0.0101153	0.236629	Scaling	Buffering	Buffering	Buffering
430	AP1G1	AP1G1	0.0109742	0.331067	1.31009e-09	-0.429827	5.56501e-07	0.760894	sp.O43747.AP1G1_HUMAN	0.485503	0.0670945	0.000384879	-0.205798	0.0094361	0.272892	Scaling	Scaling	Buffering	Buffering
431	AP1G2	AP1G2	0.00391695	0.503521	1.84098e-06	-0.710415	1.59176e-08	1.21394	sp.O75843.AP1G2_HUMAN	0.0145502	0.359593	0.0401839	-0.213998	0.000522503	0.573591	Scaling	Scaling	Scaling	Buffering
432	AP1M1	AP1M1	3.19966e-06	0.850598	0.00170395	-0.294102	1.50819e-08	1.1447	sp.Q9BXS5.AP1M1_HUMAN	0.304435	0.117715	0.103937	-0.100808	0.0619313	0.218523	Scaling	Scaling	Buffering	Buffering
433	AP1M2	AP1M2	0.00587215	-1.8134	0.0264877	0.618755	0.000478074	-2.43216	sp.Q9Y6Q5.2.AP1M2_HUMAN	1.24447e-05	-0.539999	0.0683059	0.20938	1.50508e-07	-0.74938	Anti-Scaling	Anti-Scaling	Anti-Scaling	Anti-Scaling
434	AP1S1	AP1S1	1.53649e-10	0.593709	0.00121283	-0.407807	7.38337e-12	1.00152	sp.P61966.AP1S1_HUMAN	0.863778	0.0125665	0.699739	0.0449697	0.78464	-0.0324032	Scaling	Scaling	Buffering	Buffering
435	AP1S3	AP1S3	0.381404	0.179401	0.423222	-0.133773	0.191851	0.313174	sp.Q96PC3.2.AP1S3_HUMAN	0.985893	0.00283361	0.389976	0.0939339	0.5763	-0.0911003	Buffering	Buffering	Buffering	Buffering
436	AP2A1	AP2A1	0.119958	0.139883	2.88261e-05	-0.294522	2.06568e-05	0.434405	sp.O95782.AP2A1_HUMAN	0.147524	0.115173	0.506073	-0.04176	0.0669215	0.156933	Buffering	Scaling	Buffering	Buffering
437	AP2A2	AP2A2	0.1715	0.145146	2.02635e-10	-0.429848	2.51497e-06	0.574994	sp.O94973.2.AP2A2_HUMAN	0.462505	0.0826574	0.00846037	-0.17277	0.0347247	0.255427	Buffering	Scaling	Buffering	Buffering
438	AP2B1	AP2B1	5.81641e-05	0.449314	0.000183423	-0.417873	4.52174e-09	0.867187	sp.P63010.2.AP2B1_HUMAN	0.582354	0.032931	0.316274	-0.0622	0.215299	0.095131	Scaling	Scaling	Buffering	Buffering
439	AP2M1	AP2M1	0.000126658	0.349842	0.0486024	-0.258745	5.77464e-05	0.608586	sp.Q96CW1.2.AP2M1_HUMAN	0.47229	0.0508874	0.115152	0.14944	0.351485	-0.0985526	Scaling	Scaling	Buffering	Anti-Scaling
440	AP2S1	AP2S1	0.051117	0.173995	5.43815e-06	-0.355601	1.61321e-07	0.529595	sp.P53680.AP2S1_HUMAN	0.347676	0.0688552	0.99934	-5.38768e-05	0.396416	0.0689091	Buffering	Scaling	Buffering	Buffering
441	AP3B1	AP3B1	0.0251655	0.242291	2.39922e-07	-0.30152	5.07739e-06	0.543811	sp.O00203.AP3B1_HUMAN	0.0101147	0.277849	0.0189102	-0.158517	0.000282355	0.436366	Buffering	Scaling	Scaling	Buffering
442	AP3D1	AP3D1	0.175062	0.201259	0.000403173	-0.221676	0.00808178	0.422936	sp.O14617.5.AP3D1_HUMAN	0.946418	0.00827381	0.000150356	-0.22964	0.0635152	0.237914	Buffering	Buffering	Buffering	Buffering
443	AP3M1	AP3M1	0.0369676	0.209558	3.74272e-05	-0.268507	6.05307e-05	0.478065	sp.Q9Y2T2.AP3M1_HUMAN	0.338443	0.132271	0.979118	0.00175934	0.364343	0.130512	Buffering	Scaling	Buffering	Buffering
444	AP3M2	AP3M2	0.546234	0.0962755	1.83222e-05	-0.367544	0.00555762	0.463819	sp.P53677.AP3M2_HUMAN	0.207436	0.155849	0.00455843	-0.191464	0.00607696	0.347313	Buffering	Scaling	Buffering	Buffering
445	AP3S1	AP3S1	0.0080926	0.450074	9.2094e-06	-0.439082	3.42053e-06	0.889156	sp.Q92572.AP3S1_HUMAN	0.0161995	0.253002	0.000241246	-0.272844	1.82542e-05	0.525846	Scaling	Scaling	Scaling	Scaling
446	AP3S2	AP3S2	0.00214789	0.375981	0.000633595	-0.237271	1.1524e-05	0.613251	sp.P59780.AP3S2_HUMAN	0.860503	0.0487399	0.576902	-0.0661229	0.690893	0.114863	Scaling	Buffering	Buffering	Buffering
447	AP4B1	AP4B1	0.00279578	0.454747	0.000110746	-0.322237	5.55994e-06	0.776984	sp.Q9Y6B7.AP4B1_HUMAN	0.0631416	-0.222635	0.0860036	-0.146412	0.567783	-0.0762229	Scaling	Scaling	Anti-Scaling	Buffering
448	AP4E1	AP4E1	0.0111681	0.283356	1.77628e-05	-0.282555	1.57101e-05	0.565911	sp.Q9UPM8.AP4E1_HUMAN	0.0587862	0.229037	0.0216458	-0.154069	0.00425792	0.383106	Scaling	Scaling	Buffering	Buffering
449	AP4M1	AP4M1	2.19293e-10	0.440212	0.000188472	-0.457426	8.82731e-11	0.897638	sp.O00189.AP4M1_HUMAN	0.143117	0.0880278	0.00112542	-0.31825	6.47256e-05	0.406278	Scaling	Scaling	Buffering	Scaling
450	AP5B1	AP5B1	0.796636	-0.0241442	0.625572	-0.0420019	0.871944	0.0178577	sp.Q2VPB7.AP5B1_HUMAN	0.93571	0.00592059	0.482115	0.0621017	0.54746	-0.0561811	Buffering	Buffering	Buffering	Buffering
451	AP5M1	AP5M1	0.000633283	0.358717	1.55502e-08	-0.396419	7.70148e-10	0.755136	sp.Q9H0R1.AP5M1_HUMAN	0.0160268	0.189709	0.111589	-0.0964382	0.00103236	0.286147	Scaling	Scaling	Buffering	Buffering
452	AP5S1	AP5S1	8.98445e-15	0.612669	1.53191e-06	-0.393892	4.37471e-22	1.00656	sp.Q9NUS5.AP5S1_HUMAN	0.243548	0.0851857	0.250288	-0.0785921	0.0460646	0.163778	Scaling	Scaling	Buffering	Buffering
453	AP5Z1	AP5Z1	6.26863e-10	0.436273	0.00152666	-0.450648	2.89821e-08	0.886921	sp.O43299.AP5Z1_HUMAN	0.537276	0.0347224	0.669864	-0.036278	0.404199	0.0710004	Scaling	Scaling	Buffering	Buffering
454	APAF1	APAF1	0.989086	-0.00143255	1.14452e-05	-0.405665	0.00161106	0.404233	sp.O14727.APAF_HUMAN	0.433212	-0.0964685	0.00135638	-0.31601	0.124973	0.219542	Buffering	Scaling	Buffering	Scaling
455	APBA1	APBA1	0.822617	0.0295538	0.458777	-0.0836419	0.439177	0.113196	sp.Q02410.APBA1_HUMAN	0.924306	0.0243257	0.364781	0.23648	0.510629	-0.212154	Buffering	Buffering	Buffering	Anti-Scaling
456	APBA3	APBA3	0.0142183	0.333621	7.63089e-11	-0.360192	1.38958e-05	0.693813	sp.O96018.APBA3_HUMAN	0.727002	-0.0557147	0.256267	-0.09392	0.814458	0.0382054	Scaling	Scaling	Buffering	Buffering
457	APBB1	APBB1	0.973093	-0.0108965	0.195927	-0.261097	0.468961	0.250201	sp.O00213.APBB1_HUMAN	0.70185	-0.100452	0.505976	-0.148992	0.86803	0.0485407	Buffering	Scaling	Anti-Scaling	Buffering
458	APBB1IP	APBB1IP	0.699511	0.150302	0.00111655	-0.636579	0.0428553	0.786881	sp.Q7Z5R6.AB1IP_HUMAN	0.381959	0.3177	0.0970285	-0.322502	0.0783257	0.640202	Buffering	Scaling	Scaling	Scaling
459	APBB2	APBB2	0.333607	0.331633	0.0219856	-0.303503	0.0714405	0.635136	sp.Q92870.4.APBB2_HUMAN	0.0314359	0.412804	0.413876	-0.0740767	0.0121504	0.486881	Scaling	Scaling	Scaling	Buffering
460	APC	APC	0.0131286	0.259553	0.000754767	-0.274456	1.73689e-05	0.53401	sp.P25054.APC_HUMAN	0.436922	0.0819039	0.0945766	-0.165467	0.0685156	0.247371	Scaling	Scaling	Buffering	Buffering
461	APC2	APC2	0.340346	0.241373	0.000558141	-0.250926	0.0592333	0.492299	sp.O95996.APC2_HUMAN	0.310185	0.17479	0.239768	0.0868058	0.607709	0.0879841	Buffering	Scaling	Buffering	Buffering
462	APEH	APEH	0.0621039	0.307034	1.87932e-15	-0.547657	3.40752e-05	0.854691	sp.P13798.ACPH_HUMAN	0.0204647	0.429545	3.77306e-13	-0.518029	2.74819e-05	0.947574	Scaling	Scaling	Scaling	Scaling
463	APEX1	APEX1	0.0397971	0.191854	6.61685e-08	-0.380864	1.37833e-07	0.572718	sp.P27695.APEX1_HUMAN	0.212585	0.120038	0.0123531	-0.206111	0.00306381	0.326149	Buffering	Scaling	Buffering	Buffering
464	APH1A	APH1A	0.0116183	0.152914	0.00231791	-0.330385	5.30655e-05	0.483299	sp.Q96BI3.APH1A_HUMAN	0.502811	0.0767785	0.67679	-0.0497154	0.369344	0.126494	Buffering	Scaling	Buffering	Buffering
465	API5	API5	0.0138973	0.235453	3.58965e-05	-0.29717	3.50516e-06	0.532623	sp.Q9BZZ5.API5_HUMAN	0.0569314	0.114874	0.00823138	-0.122996	0.000502752	0.23787	Buffering	Scaling	Buffering	Buffering
466	APIP	APIP	0.002038	0.291734	0.00667095	-0.304474	1.17353e-05	0.596207	sp.Q96GX9.MTNB_HUMAN	0.0863889	0.18454	0.000436775	-0.404034	4.05849e-05	0.588573	Scaling	Scaling	Buffering	Scaling
467	APLF	APLF	0.0781999	0.138126	0.0854827	-0.143889	0.00827882	0.282015	sp.Q8IW19.APLF_HUMAN	0.697397	0.0776203	0.0492134	-0.345805	0.0898185	0.423426	Buffering	Buffering	Buffering	Scaling
468	APLP1	APLP1	0.359018	0.287348	0.43766	-0.196137	0.16484	0.483485	tr.F5GZ08.F5GZ08_HUMAN	0.259047	0.383531	0.861868	-0.0541917	0.273549	0.437723	Scaling	Buffering	Scaling	Buffering
469	APLP2	APLP2	0.000138345	0.613086	0.0403069	-0.247116	8.75025e-07	0.860202	sp.Q06481.APLP2_HUMAN	0.00189275	0.486425	0.0620687	-0.226055	5.11655e-05	0.712481	Scaling	Buffering	Scaling	Buffering
470	APMAP	APMAP	3.52766e-11	0.627022	2.88888e-05	-0.436727	1.93571e-18	1.06375	sp.Q9HDC9.APMAP_HUMAN	1.92886e-06	0.448932	0.0105813	-0.248059	3.54484e-10	0.696992	Scaling	Scaling	Scaling	Buffering
471	APOA1	APOA1	0.0463343	-0.309326	0.361681	-0.170608	0.454222	-0.138718	sp.P02647.APOA1_HUMAN	0.745174	-0.063915	0.163858	0.253326	0.164423	-0.317241	Anti-Scaling	Buffering	Buffering	Anti-Scaling
472	APOB	APOB	0.270286	0.309757	0.263111	0.316717	0.985757	-0.00695942	sp.P04114.APOB_HUMAN	0.526861	0.112829	0.266826	0.213491	0.67662	-0.100662	Scaling	Anti-Scaling	Buffering	Anti-Scaling
473	APOBEC3A	APOBEC3A	0.398508	-0.0426408	0.602294	0.0257902	0.173108	-0.068431	sp.P31941.ABC3A_HUMAN	0.00219277	0.781454	0.5442	-0.0885654	0.00100527	0.87002	Buffering	Buffering	Scaling	Buffering
474	APOBEC3B	APOBEC3B	1.82661e-06	1.56789	0.271426	-0.22106	1.93359e-07	1.78895	tr.B0QYD3.B0QYD3_HUMAN	0.028827	0.85088	0.653152	-0.0798874	0.0203829	0.930768	Scaling	Buffering	Scaling	Buffering
475	APOBEC3C	APOBEC3C	0.249546	0.42079	0.0929468	-0.319093	0.0492347	0.739883	sp.Q9NRW3.ABC3C_HUMAN	0.477306	0.167112	0.220164	-0.196487	0.13635	0.363598	Scaling	Scaling	Buffering	Buffering
476	APOBEC3D	APOBEC3D	0.618588	-0.0955493	0.0117376	-0.25796	0.400391	0.16241	sp.Q96AK3.ABC3D_HUMAN	0.0127157	0.562375	0.060594	-0.235518	0.000807149	0.797893	Buffering	Scaling	Scaling	Buffering
477	APOBEC3F	APOBEC3F	0.0123298	0.538957	0.0163616	-0.259759	0.000468391	0.798715	sp.Q8IUX4.ABC3F_HUMAN	0.0129995	0.721207	0.861644	0.026963	0.0189571	0.694244	Scaling	Scaling	Scaling	Buffering
478	APOBEC3G	APOBEC3G	0.48004	0.250473	0.0549917	-0.349448	0.101811	0.599921	sp.Q9HC16.ABC3G_HUMAN	0.285641	0.430502	0.942373	-0.0119228	0.283442	0.442425	Scaling	Scaling	Scaling	Buffering
479	APOBR	APOBR	0.915536	-0.0175089	0.34805	-0.108936	0.609527	0.0914274	sp.Q0VD83.4.APOBR_HUMAN	0.270532	-0.281226	0.897522	0.0365637	0.334357	-0.31779	Buffering	Buffering	Anti-Scaling	Buffering
480	APOC1	APOC1	0.0172042	0.817759	0.349278	-0.239479	0.00442234	1.05724	sp.P02654.APOC1_HUMAN	0.502774	0.194379	0.299938	-0.381438	0.167987	0.575818	Scaling	Buffering	Buffering	Scaling
481	APOC2	APOC2	0.962621	0.0139992	0.0197528	-0.408116	0.150635	0.422115	sp.P02655.APOC2_HUMAN	0.82453	0.09605	0.161178	-0.470641	0.235755	0.566691	Buffering	Scaling	Buffering	Scaling
482	APOC3	APOC3	0.0842044	-0.116757	0.835172	-0.0223368	0.29235	-0.0944202	sp.P02656.APOC3_HUMAN	0.638693	-0.270654	0.794533	0.0735607	0.573426	-0.344215	Anti-Scaling	Buffering	Anti-Scaling	Buffering
483	APOD	APOD	0.174509	-0.300945	0.0140377	-0.529732	0.352855	0.228788	sp.P05090.APOD_HUMAN	0.377587	-0.239692	0.00228514	-0.980357	0.0317217	0.740665	Anti-Scaling	Scaling	Anti-Scaling	Scaling
484	APOE	APOE	0.533803	0.236488	0.632961	0.166042	0.874916	0.0704459	sp.P02649.APOE_HUMAN	0.36228	0.153838	0.484264	0.105642	0.806458	0.0481951	Buffering	Anti-Scaling	Buffering	Anti-Scaling
485	APOH	APOH	0.737332	-0.0446838	0.64133	0.108448	0.533513	-0.153132	sp.P02749.APOH_HUMAN	0.115188	-0.344353	0.180872	-0.290198	0.84106	-0.0541548	Buffering	Anti-Scaling	Anti-Scaling	Scaling
486	APOL1	APOL1	0.0849302	0.940895	0.322959	-0.230225	0.0349599	1.17112	sp.O14791.2.APOL1_HUMAN	0.249632	0.576816	0.286331	-0.22452	0.112408	0.801336	Scaling	Buffering	Scaling	Buffering
487	APOL2	APOL2	0.000135332	0.893948	0.000323262	-0.425017	3.87803e-07	1.31896	sp.Q9BQE5.APOL2_HUMAN	0.000398477	0.904397	0.023115	-0.293343	1.04963e-05	1.19774	Scaling	Scaling	Scaling	Scaling
488	APOM	APOM	0.794103	0.0517915	0.0377636	-0.231864	0.188524	0.283656	sp.O95445.APOM_HUMAN	0.862038	0.0320886	0.508877	0.106369	0.734779	-0.0742804	Buffering	Buffering	Buffering	Anti-Scaling
489	APP	APP	0.603311	-0.248826	0.352932	-0.157699	0.848248	-0.0911268	sp.P05067.8.A4_HUMAN	0.772896	0.0944956	0.68976	-0.0920356	0.590319	0.186531	Anti-Scaling	Buffering	Buffering	Buffering
490	APP	APP	0.603311	-0.248826	0.352932	-0.157699	0.848248	-0.0911268	sp.P05067.A4_HUMAN	0.953177	-0.0119839	0.576983	-0.0601695	0.816781	0.0481855	Anti-Scaling	Buffering	Buffering	Buffering
491	APPBP2	APPBP2	0.000428411	0.304157	0.000284742	-0.350148	1.81675e-08	0.654305	sp.Q92624.APBP2_HUMAN	0.500304	0.0775143	0.0760196	-0.380264	0.0412555	0.457779	Scaling	Scaling	Buffering	Scaling
492	APPL1	APPL1	0.112972	0.237714	1.92573e-12	-0.489355	8.04273e-05	0.727068	sp.Q9UKG1.DP13A_HUMAN	0.0618488	0.345627	3.33173e-11	-0.425997	0.000354176	0.771625	Buffering	Scaling	Scaling	Scaling
493	APPL2	APPL2	0.000781427	0.421995	0.0110853	-0.268716	5.95302e-06	0.690711	sp.Q8NEU8.DP13B_HUMAN	0.0277574	0.301885	0.375922	-0.0928973	0.0111498	0.394782	Scaling	Scaling	Scaling	Buffering
494	APRT	APRT	8.2864e-06	0.375018	7.44561e-07	-0.387397	5.38263e-14	0.762416	sp.P07741.APT_HUMAN	0.0114847	0.330165	0.00604621	-0.242424	6.06599e-05	0.57259	Scaling	Scaling	Scaling	Buffering
495	APTX	APTX	0.0141046	0.241335	2.2496e-09	-0.316122	8.35582e-07	0.557458	sp.Q7Z2E3.APTX_HUMAN	0.167687	0.143264	0.0320828	-0.113893	0.0176931	0.257158	Buffering	Scaling	Buffering	Buffering
496	AQP3	AQP3	0.568532	0.260791	0.735336	0.0889231	0.702825	0.171868	sp.Q92482.AQP3_HUMAN	0.456391	0.427238	0.619928	0.144614	0.626589	0.282624	Scaling	Buffering	Scaling	Anti-Scaling
497	AQR	AQR	0.050876	0.250748	4.64028e-08	-0.316892	0.000119468	0.56764	sp.O60306.AQR_HUMAN	0.0754745	0.162073	0.933361	0.00453819	0.0995536	0.157534	Scaling	Scaling	Buffering	Buffering
498	ARAP1	ARAP1	0.000662922	0.37631	0.0349101	-0.223158	1.98142e-05	0.599469	sp.Q96P48.ARAP1_HUMAN	0.0117474	0.226519	0.207151	-0.106625	0.00216807	0.333143	Scaling	Buffering	Buffering	Buffering
499	ARAP3	ARAP3	0.381606	0.235049	0.165693	0.250083	0.958926	-0.015034	sp.Q8WWN8.ARAP3_HUMAN	0.503056	0.107572	0.823616	0.0351401	0.704948	0.0724324	Buffering	Anti-Scaling	Buffering	Buffering
500	ARCN1	ARCN1	2.79087e-06	0.347876	1.19032e-07	-0.414858	1.39448e-14	0.762734	sp.P48444.COPD_HUMAN	0.00199565	0.176942	0.0175718	-0.122109	1.10124e-05	0.299051	Scaling	Scaling	Buffering	Buffering
501	AREL1	AREL1	0.00266181	0.282791	1.3378e-08	-0.408219	1.95701e-09	0.69101	sp.O15033.AREL1_HUMAN	0.636159	0.114955	0.0274737	-0.323676	0.100437	0.438631	Scaling	Scaling	Buffering	Scaling
502	ARF3	ARF3	0.764992	0.0296993	0.0102917	-0.194274	0.0551982	0.223973	sp.P61204.ARF3_HUMAN	0.63876	-0.0368192	0.95025	-0.0038098	0.716325	-0.0330094	Buffering	Buffering	Buffering	Buffering
503	ARF4	ARF4	0.0352476	0.348091	1.96802e-05	-0.325081	0.000313748	0.673172	sp.P18085.ARF4_HUMAN	0.411383	0.156425	0.00022537	-0.283504	0.0304397	0.439929	Scaling	Scaling	Buffering	Scaling
504	ARF5	ARF5	1.66666e-09	0.37398	1.54055e-05	-0.421865	1.00177e-12	0.795845	sp.P84085.ARF5_HUMAN	4.19805e-06	0.31532	0.0025144	-0.294371	3.73893e-08	0.609691	Scaling	Scaling	Scaling	Scaling
505	ARF6	ARF6	8.95855e-05	0.398121	2.2468e-06	-0.351179	4.87402e-10	0.7493	sp.P62330.ARF6_HUMAN	0.00285025	0.303785	0.172409	-0.100967	0.000370748	0.404752	Scaling	Scaling	Scaling	Buffering
506	ARFGAP1	ARFGAP1	3.26773e-14	0.505614	0.165574	-0.264506	0.000428458	0.77012	sp.Q8N6T3.ARFG1_HUMAN	0.357734	0.146238	0.82874	-0.080344	0.564288	0.226582	Scaling	Scaling	Buffering	Buffering
507	ARFGAP1	ARFGAP1	3.26773e-14	0.505614	0.165574	-0.264506	0.000428458	0.77012	sp.Q8N6T3.2.ARFG1_HUMAN	1.12553e-07	0.323519	0.444692	-0.105085	0.00461988	0.428604	Scaling	Scaling	Scaling	Buffering
508	ARFGAP2	ARFGAP2	5.94902e-05	0.389796	0.237958	-0.0916106	2.17158e-05	0.481407	sp.Q8N6H7.ARFG2_HUMAN	0.142334	0.132967	0.0217854	-0.198384	0.00338271	0.331351	Scaling	Buffering	Buffering	Buffering
509	ARFGAP3	ARFGAP3	4.81508e-08	0.724015	1.48205e-07	-0.426646	2.66129e-13	1.15066	sp.Q9NP61.ARFG3_HUMAN	0.0333406	0.407912	1.60021e-06	-0.376734	0.000236065	0.784646	Scaling	Scaling	Scaling	Scaling
510	ARFGEF1	ARFGEF1	5.13148e-10	0.442204	5.45336e-06	-0.498924	3.16361e-13	0.941128	sp.Q9Y6D6.BIG1_HUMAN	0.000123483	0.304024	0.000219338	-0.334357	9.56179e-09	0.638381	Scaling	Scaling	Scaling	Scaling
511	ARFGEF2	ARFGEF2	3.58982e-17	0.482134	0.500204	-0.102082	0.000818576	0.584216	sp.Q9Y6D5.BIG2_HUMAN	8.20221e-06	0.282337	0.133787	-0.182513	0.000770294	0.46485	Scaling	Buffering	Scaling	Buffering
512	ARFGEF3	ARFGEF3	0.433571	0.249108	0.923769	0.0129616	0.46335	0.236147	sp.Q5TH69.BIG3_HUMAN	0.947157	-0.0198303	0.437046	-0.115018	0.758993	0.0951876	Buffering	Buffering	Buffering	Buffering
513	ARFIP1	ARFIP1	0.185317	0.244052	4.24849e-06	-0.262608	0.0129304	0.50666	sp.P53367.ARFP1_HUMAN	0.0977104	0.242431	3.95614e-05	-0.246103	0.00320867	0.488533	Buffering	Scaling	Buffering	Buffering
514	ARFIP2	ARFIP2	0.00221618	0.307855	2.06862e-07	-0.379893	4.53591e-09	0.687748	sp.P53365.ARFP2_HUMAN	0.000968712	0.310047	0.00128384	-0.220598	3.3086e-07	0.530644	Scaling	Scaling	Scaling	Buffering
515	ARFRP1	ARFRP1	1.73986e-15	0.50299	0.184467	-0.186162	4.42762e-05	0.689151	sp.Q13795.ARFRP_HUMAN	1.30804e-07	0.349538	0.0971503	-0.23769	0.000279282	0.587228	Scaling	Buffering	Scaling	Buffering
516	ARG2	ARG2	0.304741	0.20825	0.102066	-0.25347	0.0394108	0.46172	sp.P78540.ARGI2_HUMAN	0.492471	0.1651	0.0142877	-0.432749	0.02269	0.597849	Buffering	Scaling	Buffering	Scaling
517	ARGLU1	ARGLU1	3.93686e-07	0.777238	2.63907e-11	-0.53412	2.89379e-13	1.31136	sp.Q9NWB6.ARGL1_HUMAN	0.028848	0.237165	0.0302434	-0.126586	0.00163355	0.363751	Scaling	Scaling	Buffering	Buffering
518	ARHGAP1	ARHGAP1	0.0102903	0.27256	0.362614	-0.0758015	0.00423647	0.348361	sp.Q07960.RHG01_HUMAN	0.100873	0.183444	0.438814	-0.0668507	0.0494471	0.250295	Scaling	Buffering	Buffering	Buffering
519	ARHGAP10	ARHGAP10	0.244107	0.432864	0.317543	-0.112554	0.149181	0.545418	sp.A1A4S6.RHG10_HUMAN	0.112238	0.50926	0.289709	-0.0914226	0.067148	0.600683	Scaling	Buffering	Scaling	Buffering
520	ARHGAP11A	ARHGAP11A	0.0978309	0.255421	0.00156019	-0.307698	0.0015136	0.563119	sp.Q6P4F7.RHGBA_HUMAN	0.684187	0.0736726	0.00324973	-0.264368	0.0850168	0.33804	Scaling	Scaling	Buffering	Scaling
521	ARHGAP12	ARHGAP12	0.126395	0.211345	0.00986069	-0.245732	0.00197503	0.457077	sp.Q8IWW6.RHG12_HUMAN	0.187944	0.174052	0.0839739	-0.134578	0.0246483	0.30863	Buffering	Buffering	Buffering	Buffering
522	ARHGAP15	ARHGAP15	0.0138065	-0.477423	9.01696e-05	-0.584415	0.566577	0.106992	sp.Q53QZ3.RHG15_HUMAN	0.00153357	-0.603473	0.142403	-0.402662	0.431794	-0.20081	Anti-Scaling	Scaling	Anti-Scaling	Scaling
523	ARHGAP17	ARHGAP17	0.00548009	0.369496	9.23826e-06	-0.358056	9.92322e-07	0.727553	sp.Q68EM7.2.RHG17_HUMAN	0.076961	0.494859	0.00722656	-0.450826	0.0015859	0.945685	Scaling	Scaling	Scaling	Scaling
524	ARHGAP17	ARHGAP17	0.00548009	0.369496	9.23826e-06	-0.358056	9.92322e-07	0.727553	sp.Q68EM7.5.RHG17_HUMAN	0.000203975	0.499085	0.000189208	-0.293891	7.73711e-08	0.792976	Scaling	Scaling	Scaling	Scaling
525	ARHGAP18	ARHGAP18	0.298552	0.322057	0.13697	-0.205987	0.0974172	0.528044	sp.Q8N392.RHG18_HUMAN	0.34773	0.21762	0.408318	-0.093953	0.189651	0.311573	Scaling	Buffering	Buffering	Buffering
526	ARHGAP21	ARHGAP21	0.00279998	0.528	0.0276788	-0.238898	6.28255e-05	0.766897	sp.Q5T5U3.RHG21_HUMAN	0.00152723	0.371632	0.189257	-0.081665	0.00019406	0.453297	Scaling	Buffering	Scaling	Buffering
527	ARHGAP23	ARHGAP23	0.234387	0.32117	0.0618424	0.538432	0.536169	-0.217262	sp.Q9P227.RHG23_HUMAN	0.368998	0.216269	0.981645	0.00563923	0.493631	0.21063	Scaling	Anti-Scaling	Buffering	Buffering
528	ARHGAP25	ARHGAP25	0.0223424	-0.360442	0.122582	-0.245981	0.525033	-0.114462	sp.P42331.4.RHG25_HUMAN	0.000209955	-0.580093	0.0471734	-0.441607	0.518046	-0.138486	Anti-Scaling	Buffering	Anti-Scaling	Scaling
529	ARHGAP26	ARHGAP26	0.853684	0.0365436	0.185163	-0.18093	0.315678	0.217474	sp.Q9UNA1.RHG26_HUMAN	0.0344991	0.327257	0.379714	-0.115973	0.0151028	0.443229	Buffering	Buffering	Scaling	Buffering
530	ARHGAP27	ARHGAP27	0.445537	-0.160319	0.454043	-0.167785	0.978697	0.00746607	sp.Q6ZUM4.RHG27_HUMAN	0.464188	-0.103427	0.253029	-0.161873	0.744979	0.0584459	Anti-Scaling	Buffering	Anti-Scaling	Buffering
531	ARHGAP28	ARHGAP28	0.0505474	0.34038	0.282538	-0.120593	0.00837458	0.460972	sp.Q9P2N2.RHG28_HUMAN	0.545741	0.196044	0.644118	-0.108427	0.359708	0.304471	Scaling	Buffering	Buffering	Buffering
532	ARHGAP29	ARHGAP29	0.0418672	0.894294	0.387917	0.218528	0.143316	0.675766	sp.Q52LW3.RHG29_HUMAN	0.267379	0.224974	0.679913	-0.0577096	0.193352	0.282684	Scaling	Anti-Scaling	Buffering	Buffering
533	ARHGAP30	ARHGAP30	0.491129	0.158129	3.44547e-08	-0.757207	4.65233e-05	0.915336	sp.Q7Z6I6.RHG30_HUMAN	0.296842	-0.713354	0.03795	-0.617231	0.88202	-0.0961229	Buffering	Scaling	Anti-Scaling	Scaling
534	ARHGAP31	ARHGAP31	0.23885	-0.182947	0.173323	-0.223621	0.838075	0.0406745	sp.Q2M1Z3.RHG31_HUMAN	0.0765616	-0.48279	0.314369	-0.451712	0.949555	-0.0310779	Anti-Scaling	Buffering	Anti-Scaling	Scaling
535	ARHGAP32	ARHGAP32	0.115504	0.309326	0.0839611	-0.205901	0.00967756	0.515226	sp.A7KAX9.RHG32_HUMAN	0.345301	0.142474	0.168632	-0.14505	0.0671805	0.287524	Scaling	Buffering	Buffering	Buffering
536	ARHGAP35	ARHGAP35	0.000115544	0.358157	0.00168249	-0.29386	2.16358e-08	0.652018	sp.Q9NRY4.RHG35_HUMAN	0.491784	0.0602444	0.00109463	-0.282174	0.00111692	0.342418	Scaling	Scaling	Buffering	Scaling
537	ARHGAP39	ARHGAP39	0.0253324	0.264295	0.795263	0.0350777	0.145088	0.229217	sp.Q9C0H5.2.RHG39_HUMAN	0.0641751	0.190732	0.0682121	0.282041	0.56999	-0.0913084	Scaling	Buffering	Buffering	Anti-Scaling
538	ARHGAP42	ARHGAP42	0.0270294	0.349995	0.569987	-0.082475	0.0176919	0.43247	sp.A6NI28.RHG42_HUMAN	0.41689	0.12926	0.58234	-0.0830373	0.25568	0.212297	Scaling	Buffering	Buffering	Buffering
539	ARHGAP5	ARHGAP5	0.00012587	0.58785	0.292604	-0.134087	1.7469e-05	0.721937	sp.Q13017.RHG05_HUMAN	0.0196995	0.259056	0.473863	-0.0599102	0.00709648	0.318966	Scaling	Buffering	Scaling	Buffering
540	ARHGAP8	ARHGAP8	0.553499	-0.299878	0.0853513	0.38117	0.188689	-0.681048	sp.P85298.RHG08_HUMAN	0.894675	0.0395214	0.465688	-0.126612	0.584651	0.166134	Anti-Scaling	Anti-Scaling	Buffering	Buffering
541	ARHGDIA	ARHGDIA	0.00219176	0.26408	0.0187592	-0.232011	2.35185e-05	0.496091	sp.P52565.GDIR1_HUMAN	0.00598888	0.275575	0.00752514	-0.307565	2.6886e-05	0.58314	Scaling	Buffering	Scaling	Scaling
542	ARHGDIB	ARHGDIB	0.834535	-0.0859467	0.268372	-0.399031	0.510825	0.313085	sp.P52566.GDIR2_HUMAN	0.528579	0.158091	0.488623	-0.152587	0.27504	0.310678	Buffering	Scaling	Buffering	Buffering
543	ARHGEF1	ARHGEF1	0.0584263	0.218331	0.00150374	-0.272821	0.000100549	0.491152	tr.M0QZR4.M0QZR4_HUMAN	0.138688	0.147445	0.0155167	-0.190286	0.00259334	0.337731	Buffering	Scaling	Buffering	Buffering
544	ARHGEF10	ARHGEF10	0.337648	-0.328781	0.000111736	-0.58012	0.457986	0.251339	sp.O15013.ARHGA_HUMAN	0.878279	-0.0432567	0.0160757	-0.28914	0.379631	0.245883	Anti-Scaling	Scaling	Buffering	Scaling
545	ARHGEF10L	ARHGEF10L	0.446024	0.203316	0.110547	0.243792	0.886685	-0.0404761	sp.Q9HCE6.ARGAL_HUMAN	0.81408	-0.0768172	0.458948	0.146176	0.532738	-0.222993	Buffering	Anti-Scaling	Buffering	Anti-Scaling
546	ARHGEF11	ARHGEF11	0.00377227	0.311352	0.00611966	-0.380184	1.24312e-05	0.691536	sp.O15085.2.ARHGB_HUMAN	0.000233372	0.287546	0.539801	-0.0565187	0.000856189	0.344064	Scaling	Scaling	Scaling	Buffering
547	ARHGEF12	ARHGEF12	0.00160315	0.398279	9.09469e-05	-0.350827	2.63951e-08	0.749107	sp.Q9NZN5.ARHGC_HUMAN	0.00362212	0.320022	0.113392	-0.106361	0.000165672	0.426383	Scaling	Scaling	Scaling	Buffering
548	ARHGEF16	ARHGEF16	0.284914	-0.371895	0.00746714	0.563663	0.0133721	-0.935557	sp.Q5VV41.ARHGG_HUMAN	0.0201136	-0.4629	0.220848	0.164438	0.00358876	-0.627338	Anti-Scaling	Anti-Scaling	Anti-Scaling	Anti-Scaling
549	ARHGEF17	ARHGEF17	0.226758	0.279539	0.127164	0.235365	0.854784	0.0441734	sp.Q96PE2.ARHGH_HUMAN	0.199665	0.184646	0.178779	0.139559	0.770975	0.0450872	Scaling	Anti-Scaling	Buffering	Anti-Scaling
550	ARHGEF18	ARHGEF18	0.189023	0.234997	0.109984	-0.115801	0.0586775	0.350798	sp.Q6ZSZ5.ARHGI_HUMAN	0.941791	-0.0212236	5.7448e-05	-0.287995	0.366878	0.266772	Buffering	Buffering	Buffering	Scaling
551	ARHGEF2	ARHGEF2	0.0538581	0.248748	0.146783	-0.247273	0.0109338	0.49602	sp.Q92974.ARHG2_HUMAN	0.115421	0.143817	0.0472372	-0.247956	0.00481119	0.391773	Buffering	Buffering	Buffering	Buffering
552	ARHGEF26	ARHGEF26	0.140387	0.236369	0.612865	0.102172	0.555459	0.134197	sp.Q96DR7.ARHGQ_HUMAN	0.058157	0.488927	0.0879325	0.537493	0.883081	-0.0485652	Buffering	Anti-Scaling	Scaling	Anti-Scaling
553	ARHGEF28	ARHGEF28	0.0615346	0.470187	0.211211	-0.184348	0.0106252	0.654535	sp.Q8N1W1.6.ARG28_HUMAN	0.0404794	0.383926	0.00372758	-0.324712	0.000465691	0.708638	Scaling	Buffering	Scaling	Scaling
554	ARHGEF39	ARHGEF39	0.143928	0.216344	0.0173289	-0.212656	0.00470752	0.429	sp.Q8N4T4.ARG39_HUMAN	0.89014	0.0415277	0.13282	-0.452505	0.103718	0.494033	Buffering	Buffering	Buffering	Scaling
555	ARHGEF40	ARHGEF40	0.304453	-0.249763	0.0463296	0.297912	0.0340947	-0.547675	sp.Q8TER5.ARH40_HUMAN	0.286607	0.117762	0.0308457	0.185196	0.579795	-0.0674344	Anti-Scaling	Anti-Scaling	Buffering	Anti-Scaling
556	ARHGEF5	ARHGEF5	0.598585	-0.115272	0.211982	0.292236	0.120381	-0.407507	sp.Q12774.ARHG5_HUMAN	0.428775	0.135294	0.224544	0.230201	0.656057	-0.0949077	Anti-Scaling	Anti-Scaling	Buffering	Anti-Scaling
557	ARHGEF7	ARHGEF7	4.33399e-06	0.491376	1.1071e-10	-0.497709	6.40293e-15	0.989085	sp.Q14155.5.ARHG7_HUMAN	0.00184604	0.305916	3.04642e-08	-0.332584	9.72378e-09	0.638499	Scaling	Scaling	Scaling	Scaling
558	ARID1A	ARID1A	0.00869479	0.387998	0.00598093	-0.238052	0.000102869	0.62605	sp.O14497.ARI1A_HUMAN	0.0162078	0.323509	0.974916	0.00312045	0.0331463	0.320389	Scaling	Buffering	Scaling	Buffering
559	ARID1B	ARID1B	0.302487	0.126551	1.24039e-12	-0.523747	9.18945e-06	0.650298	sp.Q8NFD5.3.ARI1B_HUMAN	0.363112	0.107249	0.000737581	-0.19881	0.0144201	0.306059	Buffering	Scaling	Buffering	Buffering
560	ARID2	ARID2	0.272998	0.134768	0.00367557	-0.239563	0.00733466	0.37433	sp.Q68CP9.ARID2_HUMAN	0.0727701	0.183559	0.435491	-0.0627643	0.0366775	0.246323	Buffering	Buffering	Buffering	Buffering
561	ARID3A	ARID3A	0.307851	0.323166	0.00441416	-0.360987	0.0392829	0.684153	sp.Q99856.ARI3A_HUMAN	0.37145	0.344711	0.115597	-0.224439	0.150226	0.56915	Scaling	Scaling	Scaling	Buffering
562	ARID3B	ARID3B	0.281019	-0.195964	0.00200169	-0.346838	0.427265	0.150874	sp.Q8IVW6.ARI3B_HUMAN	0.238947	-0.261081	0.129478	-0.220844	0.862725	-0.0402365	Anti-Scaling	Scaling	Anti-Scaling	Buffering
563	ARID4A	ARID4A	0.0108323	0.269022	1.02636e-06	-0.317964	1.0326e-06	0.586985	sp.P29374.ARI4A_HUMAN	0.0030801	0.260638	6.56151e-05	-0.260646	2.14706e-07	0.521285	Scaling	Scaling	Scaling	Scaling
564	ARID4B	ARID4B	5.68345e-06	0.321061	0.00238117	-0.303115	1.03559e-07	0.624175	sp.Q4LE39.ARI4B_HUMAN	0.0754962	0.103951	0.662314	0.0362634	0.453389	0.0676879	Scaling	Scaling	Buffering	Buffering
565	ARID5B	ARID5B	0.135757	0.518873	0.469336	-0.0888148	0.0862787	0.607687	sp.Q14865.ARI5B_HUMAN	0.256635	0.284698	0.942668	-0.00832112	0.256076	0.293019	Scaling	Buffering	Scaling	Buffering
566	ARIH1	ARIH1	0.00358803	0.322593	3.08544e-06	-0.279528	3.31575e-06	0.602121	sp.Q9Y4X5.ARI1_HUMAN	0.00307281	0.429284	0.000727231	-0.216851	5.62882e-05	0.646136	Scaling	Scaling	Scaling	Buffering
567	ARIH2	ARIH2	0.0284563	0.313398	3.75698e-23	-0.595138	2.00374e-06	0.908536	sp.O95376.ARI2_HUMAN	0.0496625	0.323369	9.47644e-13	-0.549321	2.17591e-05	0.872691	Scaling	Scaling	Scaling	Scaling
568	ARL1	ARL1	0.0175663	0.271557	0.021337	-0.221603	0.000533937	0.49316	sp.P40616.ARL1_HUMAN	0.407451	0.078327	0.923345	0.00706731	0.515148	0.0712597	Scaling	Buffering	Buffering	Buffering
569	ARL13B	ARL13B	0.542411	-0.0715772	0.336947	-0.137672	0.701894	0.0660946	sp.Q3SXY8.AR13B_HUMAN	0.208718	0.141762	0.491116	0.0699568	0.602373	0.0718053	Buffering	Buffering	Buffering	Buffering
570	ARL14EP	ARL14EP	0.00376437	0.280081	2.74086e-08	-0.410667	3.23943e-09	0.690749	sp.Q8N8R7.AL14E_HUMAN	0.330643	-0.0947835	0.119245	-0.101821	0.944815	0.00703761	Scaling	Scaling	Buffering	Buffering
571	ARL15	ARL15	0.0877491	0.225254	0.0117519	-0.304933	0.00120517	0.530188	sp.Q9NXU5.ARL15_HUMAN	0.870769	-0.0275289	0.187645	-0.144399	0.525403	0.11687	Buffering	Scaling	Buffering	Buffering
572	ARL2	ARL2	0.18125	0.151387	0.169895	-0.131177	0.0333899	0.282564	sp.P36404.ARL2_HUMAN	0.476935	0.066096	0.95606	0.00388001	0.53647	0.062216	Buffering	Buffering	Buffering	Buffering
573	ARL2BP	ARL2BP	0.00215927	0.363716	0.00370453	-0.259322	5.09714e-06	0.623038	sp.Q9Y2Y0.AR2BP_HUMAN	0.0192944	0.319039	0.000132336	-0.375072	5.56355e-06	0.694112	Scaling	Scaling	Scaling	Scaling
574	ARL3	ARL3	0.00159764	0.663795	0.000186144	-0.355596	1.48015e-05	1.01939	sp.P36405.ARL3_HUMAN	0.0310784	0.537324	0.0315593	-0.2324	0.00375791	0.769724	Scaling	Scaling	Scaling	Buffering
575	ARL4C	ARL4C	0.107095	0.67981	0.80572	0.0578448	0.166593	0.621965	sp.P56559.ARL4C_HUMAN	0.0476069	0.737902	0.788761	0.0677044	0.102876	0.670197	Scaling	Buffering	Scaling	Buffering
576	ARL5A	ARL5A	0.148255	0.141387	1.00863e-07	-0.467347	1.62055e-06	0.608734	sp.Q9Y689.ARL5A_HUMAN	0.0482189	0.246786	0.0466771	-0.210476	0.00269561	0.457261	Buffering	Scaling	Buffering	Buffering
577	ARL5B	ARL5B	0.00147087	0.374329	6.37329e-13	-0.513545	4.20941e-10	0.887875	sp.Q96KC2.ARL5B_HUMAN	0.175459	0.146238	8.59449e-05	-0.273905	0.000390669	0.420143	Scaling	Scaling	Buffering	Scaling
578	ARL6	ARL6	0.0194906	0.240401	0.412907	-0.094778	0.019369	0.335179	sp.Q9H0F7.ARL6_HUMAN	0.549282	0.0744179	0.825751	-0.034967	0.555431	0.109385	Buffering	Buffering	Buffering	Buffering
579	ARL6IP1	ARL6IP1	0.0413905	0.298765	9.84725e-05	-0.290725	0.000248774	0.58949	sp.Q15041.AR6P1_HUMAN	0.602853	0.0602894	0.805093	-0.0165517	0.530746	0.0768411	Scaling	Scaling	Buffering	Buffering
580	ARL6IP4	ARL6IP4	0.350702	0.0998673	0.038396	-0.153933	0.0433372	0.2538	sp.Q66PJ3.2.AR6P4_HUMAN	0.633862	-0.117989	0.457692	0.195072	0.36754	-0.313061	Buffering	Buffering	Anti-Scaling	Anti-Scaling
581	ARL6IP4	ARL6IP4	0.350702	0.0998673	0.038396	-0.153933	0.0433372	0.2538	sp.Q66PJ3.AR6P4_HUMAN	0.765507	0.0389764	0.0463572	-0.190113	0.137261	0.22909	Buffering	Buffering	Buffering	Buffering
582	ARL6IP5	ARL6IP5	0.0821356	0.410846	0.0304019	-0.182637	0.0167523	0.593483	sp.O75915.PRAF3_HUMAN	0.273379	0.24018	0.615209	0.0405006	0.363269	0.199679	Scaling	Buffering	Buffering	Buffering
583	ARL6IP6	ARL6IP6	0.0454061	0.25767	0.0110402	-0.242975	0.00106743	0.500645	sp.Q8N6S5.AR6P6_HUMAN	0.402632	0.0870406	0.159722	0.124009	0.764163	-0.0369684	Scaling	Buffering	Buffering	Anti-Scaling
584	ARL8A	ARL8A	6.69723e-06	0.384658	0.000280004	-0.497499	2.51147e-08	0.882157	sp.Q96BM9.ARL8A_HUMAN	0.00426138	0.247976	0.00289516	-0.318038	8.06286e-06	0.566014	Scaling	Scaling	Buffering	Scaling
585	ARL8B	ARL8B	0.00975709	0.302863	5.78165e-10	-0.411501	1.14258e-06	0.714363	sp.Q9NVJ2.ARL8B_HUMAN	0.978665	0.00307099	0.0173373	-0.135359	0.238413	0.13843	Scaling	Scaling	Buffering	Buffering
586	ARMC1	ARMC1	2.13864e-06	0.321431	1.48751e-08	-0.455665	1.76047e-15	0.777096	sp.Q9NVT9.ARMC1_HUMAN	0.252776	0.0646587	0.00147976	-0.290209	0.000345053	0.354868	Scaling	Scaling	Buffering	Scaling
587	ARMC10	ARMC10	4.41884e-09	0.35452	1.54199e-05	-0.40206	2.16301e-12	0.756581	sp.Q8N2F6.ARM10_HUMAN	5.98377e-06	0.307749	0.149613	-0.143818	3.35088e-05	0.451567	Scaling	Scaling	Scaling	Buffering
588	ARMC6	ARMC6	0.000229654	0.496859	1.04431e-06	-0.329497	1.46862e-07	0.826356	sp.Q6NXE6.ARMC6_HUMAN	0.418648	0.164643	1.10471e-07	-0.423175	0.00771973	0.587818	Scaling	Scaling	Buffering	Scaling
589	ARMC7	ARMC7	0.000847121	0.313795	0.0937862	-0.168632	0.000139107	0.482428	sp.Q9H6L4.ARMC7_HUMAN	0.993135	0.00148451	0.556426	-0.094362	0.638854	0.0958465	Scaling	Buffering	Buffering	Buffering
590	ARMC8	ARMC8	0.00013375	0.254927	2.3477e-05	-0.422622	4.92186e-09	0.677549	sp.Q8IUR7.ARMC8_HUMAN	0.0234357	0.121266	0.0146298	-0.175722	0.000219043	0.296987	Scaling	Scaling	Buffering	Buffering
591	ARMC9	ARMC9	0.00351351	0.73177	0.295207	0.135626	0.0193518	0.596144	sp.Q7Z3E5.ARMC9_HUMAN	0.0797078	0.387176	0.889387	0.0185769	0.122763	0.3686	Scaling	Anti-Scaling	Scaling	Buffering
592	ARNT	ARNT	0.00177457	0.268547	0.00388959	-0.422238	2.00822e-05	0.690784	sp.P27540.ARNT_HUMAN	0.134344	0.113278	0.0922768	-0.148994	0.0124427	0.262272	Scaling	Scaling	Buffering	Buffering
593	ARNTL	ARNTL	0.0581012	0.219913	0.112954	-0.139122	0.00304227	0.359035	sp.O00327.7.BMAL1_HUMAN	0.0839481	0.249311	0.865327	-0.0289757	0.161402	0.278287	Buffering	Buffering	Buffering	Buffering
594	ARNTL2	ARNTL2	0.00328072	0.608019	0.0408407	-0.410264	6.01985e-05	1.01828	sp.Q8WYA1.BMAL2_HUMAN	0.832972	0.0710321	0.848525	-0.0683382	0.741856	0.13937	Scaling	Scaling	Buffering	Buffering
595	ARPC1A	ARPC1A	2.94228e-11	0.575239	0.629482	-0.0531333	1.77385e-07	0.628372	sp.Q92747.ARC1A_HUMAN	0.518462	-0.0463688	0.832327	-0.0214824	0.811784	-0.0248863	Scaling	Buffering	Buffering	Buffering
596	ARPC1B	ARPC1B	2.4435e-06	0.580498	0.0382452	-0.3554	1.06749e-06	0.935897	sp.O15143.ARC1B_HUMAN	0.25232	0.081876	0.128937	-0.13941	0.0246106	0.221286	Scaling	Scaling	Buffering	Buffering
597	ARPC2	ARPC2	0.00203504	0.313048	0.0617972	-0.165434	0.000131898	0.478482	sp.O15144.ARPC2_HUMAN	0.101624	0.130486	0.106719	-0.10925	0.0108983	0.239736	Scaling	Buffering	Buffering	Buffering
598	ARPC3	ARPC3	0.0362054	0.228642	0.00957451	-0.200253	0.000906459	0.428894	sp.O15145.ARPC3_HUMAN	0.0896082	-0.146248	0.706965	-0.0249226	0.218803	-0.121325	Buffering	Buffering	Anti-Scaling	Buffering
599	ARPC4	ARPC4	0.000350279	0.491216	7.3445e-09	-0.418154	7.58657e-08	0.90937	sp.P59998.3.ARPC4_HUMAN	0.455665	-0.128669	0.0121671	-0.149087	0.90501	0.0204187	Scaling	Scaling	Anti-Scaling	Buffering
600	ARPC5	ARPC5	9.1866e-05	0.340751	0.0320034	-0.252439	2.43006e-05	0.593191	sp.O15511.ARPC5_HUMAN	0.0233196	0.145788	0.80396	-0.0218569	0.0886096	0.167645	Scaling	Scaling	Buffering	Buffering
601	ARPC5L	ARPC5L	0.0129784	0.204005	5.04091e-07	-0.363268	3.66857e-08	0.567273	sp.Q9BPX5.ARP5L_HUMAN	0.229685	0.103258	0.00223415	-0.189391	0.00216694	0.292648	Buffering	Scaling	Buffering	Buffering
602	ARPIN	ARPIN	0.0382953	0.580124	0.573535	-0.0801008	0.0221949	0.660225	sp.Q7Z6K5.ARPIN_HUMAN	0.117817	0.375267	0.884485	0.019699	0.144323	0.355568	Scaling	Buffering	Scaling	Buffering
603	ARPP19	ARPP19	5.13697e-05	0.482486	4.46035e-08	-0.372153	2.6848e-09	0.854639	sp.P56211.ARP19_HUMAN	0.41111	-0.215924	5.18278e-07	-0.595481	0.162138	0.379557	Scaling	Scaling	Anti-Scaling	Scaling
604	ARRB1	ARRB1	0.954108	0.0152838	0.0738112	-0.347115	0.224326	0.362399	sp.P49407.ARRB1_HUMAN	0.791837	-0.0483123	0.107328	-0.250677	0.338447	0.202365	Buffering	Scaling	Buffering	Scaling
605	ARRB1	ARRB1	0.954108	0.0152838	0.0738112	-0.347115	0.224326	0.362399	sp.P49407.2.ARRB1_HUMAN	0.947853	0.0205265	0.605134	-0.13807	0.662635	0.158597	Buffering	Scaling	Buffering	Buffering
606	ARRB2	ARRB2	0.268885	0.193386	0.000198878	-0.403916	0.0017825	0.597301	sp.P32121.3.ARRB2_HUMAN	0.360464	0.123519	0.321389	-0.0869372	0.14813	0.210456	Buffering	Scaling	Buffering	Buffering
607	ARRDC1	ARRDC1	0.14747	0.237037	0.292487	-0.146034	0.0491735	0.383071	sp.Q8N5I2.ARRD1_HUMAN	0.486634	0.0886941	0.201554	-0.121717	0.145676	0.210412	Buffering	Buffering	Buffering	Buffering
608	ARSA	ARSA	0.000372671	0.602478	9.95697e-10	-0.515017	3.37298e-08	1.11749	sp.P15289.ARSA_HUMAN	0.020003	0.450584	0.00518077	-0.276217	0.000520942	0.726801	Scaling	Scaling	Scaling	Scaling
609	ARSB	ARSB	0.437369	0.136934	0.417827	-0.0948742	0.235942	0.231808	sp.P15848.ARSB_HUMAN	0.249267	0.179408	0.372838	-0.10124	0.111725	0.280647	Buffering	Buffering	Buffering	Buffering
610	ARSI	ARSI	0.00211678	-0.448832	0.587166	0.0949911	0.00424628	-0.543823	sp.Q5FYB1.ARSI_HUMAN	0.434878	0.167627	0.57458	-0.079256	0.304182	0.246883	Anti-Scaling	Buffering	Buffering	Buffering
611	ARSK	ARSK	0.222871	0.146739	1.01954e-05	-0.365594	0.000214691	0.512333	sp.Q6UWY0.ARSK_HUMAN	0.252695	0.319856	0.0286033	-0.294479	0.0407359	0.614335	Buffering	Scaling	Scaling	Scaling
612	ARV1	ARV1	1.01228e-07	0.414054	0.00775072	-0.299721	5.3166e-08	0.713775	sp.Q9H2C2.ARV1_HUMAN	0.017552	0.268586	0.804343	0.0309154	0.10436	0.23767	Scaling	Scaling	Scaling	Buffering
613	ARVCF	ARVCF	0.332201	0.255339	0.421313	-0.105888	0.182403	0.361227	sp.O00192.ARVC_HUMAN	0.911629	0.0316709	0.860576	0.0195253	0.966367	0.0121457	Scaling	Buffering	Buffering	Buffering
614	AS3MT	AS3MT	0.099918	0.632231	0.0380404	-0.318256	0.0182882	0.950487	sp.Q9HBK9.AS3MT_HUMAN	0.503136	0.231886	0.0151191	-0.340867	0.109574	0.572754	Scaling	Scaling	Buffering	Scaling
615	ASAH1	ASAH1	0.283257	0.251177	4.57861e-06	-0.569542	0.000705423	0.82072	sp.Q13510.2.ASAH1_HUMAN	0.488148	-0.118757	0.000102888	-0.421446	0.0710846	0.302689	Scaling	Scaling	Anti-Scaling	Scaling
616	ASAP1	ASAP1	0.00962013	0.294335	0.740116	-0.051596	0.0422578	0.345931	sp.Q9ULH1.ASAP1_HUMAN	0.000263519	0.279442	0.344958	-0.0962057	0.00105209	0.375647	Scaling	Buffering	Scaling	Buffering
617	ASAP2	ASAP2	0.00745475	0.458241	0.292831	0.154776	0.116666	0.303465	sp.O43150.ASAP2_HUMAN	0.207819	0.179873	0.500943	0.0836381	0.571483	0.0962351	Scaling	Anti-Scaling	Buffering	Buffering
618	ASAP3	ASAP3	0.000144262	1.05646	0.974513	0.00533	0.00039402	1.05113	sp.Q8TDY4.ASAP3_HUMAN	0.189881	0.521268	0.541829	0.101885	0.299296	0.419383	Scaling	Buffering	Scaling	Anti-Scaling
619	ASB3	ASB3	3.89965e-05	0.277299	0.092325	-0.12833	1.63657e-05	0.40563	sp.Q9Y575.3.ASB3_HUMAN	0.157333	0.254441	0.62741	-0.124607	0.172548	0.379048	Scaling	Buffering	Scaling	Buffering
620	ASB6	ASB6	0.0790671	0.151756	3.16916e-07	-0.334163	1.46847e-06	0.485919	sp.Q9NWX5.ASB6_HUMAN	0.68563	-0.0717971	0.112305	-0.200355	0.512594	0.128558	Buffering	Scaling	Buffering	Buffering
621	ASCC1	ASCC1	0.0622478	0.278808	1.0811e-06	-0.430823	6.87287e-05	0.709631	sp.Q8N9N2.2.ASCC1_HUMAN	0.581017	-0.0504055	0.376778	-0.0497574	0.994748	-0.000648027	Scaling	Scaling	Buffering	Buffering
622	ASCC2	ASCC2	0.0164428	0.325896	1.56299e-08	-0.32075	3.26053e-05	0.646646	sp.Q9H1I8.ASCC2_HUMAN	0.286199	0.0821442	0.00638301	-0.137049	0.00860058	0.219194	Scaling	Scaling	Buffering	Buffering
623	ASCC3	ASCC3	0.240546	0.124732	1.32191e-11	-0.424802	1.70553e-05	0.549534	sp.Q8N3C0.ASCC3_HUMAN	0.360741	0.104491	0.00407287	-0.160274	0.029426	0.264766	Buffering	Scaling	Buffering	Buffering
624	ASF1A	ASF1A	0.373085	0.134959	4.44245e-10	-0.488388	0.000321518	0.623347	sp.Q9Y294.ASF1A_HUMAN	0.512803	0.0991838	2.47188e-09	-0.43666	0.00148089	0.535844	Buffering	Scaling	Buffering	Scaling
625	ASF1B	ASF1B	3.22148e-05	0.582318	0.0517407	-0.170854	5.73627e-07	0.753173	sp.Q9NVP2.ASF1B_HUMAN	0.59302	0.204017	0.169543	-0.185954	0.314294	0.389971	Scaling	Buffering	Buffering	Buffering
626	ASH1L	ASH1L	0.000142479	0.292725	0.00207085	-0.352097	1.32569e-06	0.644822	sp.Q9NR48.ASH1L_HUMAN	0.0072438	0.218211	0.37152	-0.112361	0.0151121	0.330573	Scaling	Scaling	Buffering	Buffering
627	ASH2L	ASH2L	0.00624585	0.351501	1.7044e-08	-0.491913	1.75937e-08	0.843414	sp.Q9UBL3.ASH2L_HUMAN	0.876086	0.0150202	0.393213	-0.0432171	0.540823	0.0582373	Scaling	Scaling	Buffering	Buffering
628	ASL	ASL	0.000923394	0.283227	0.000992015	-0.390312	1.81801e-07	0.673539	sp.P04424.ARLY_HUMAN	0.0066066	0.296688	0.000577453	-0.473903	7.05084e-07	0.770591	Scaling	Scaling	Scaling	Scaling
629	ASNA1	ASNA1	0.0735282	0.255461	5.7017e-08	-0.316264	0.000386171	0.571725	sp.O43681.ASNA_HUMAN	0.0685479	0.255264	1.02628e-06	-0.295274	0.000414627	0.550538	Scaling	Scaling	Scaling	Scaling
630	ASNS	ASNS	0.195946	0.208071	0.563831	-0.129486	0.158296	0.337557	sp.P08243.ASNS_HUMAN	0.143329	0.169758	0.00488831	-0.358407	0.000187553	0.528165	Buffering	Buffering	Buffering	Scaling
631	ASNSD1	ASNSD1	0.000561438	0.299346	0.00488078	-0.2315	1.9707e-06	0.530845	tr.L0R819.L0R819_HUMAN	0.445916	-0.0853917	0.0556088	-0.178044	0.484888	0.0926526	Scaling	Buffering	Buffering	Buffering
632	ASPH	ASPH	0.0067742	0.541464	0.392483	-0.263846	0.0159536	0.80531	sp.Q12797.ASPH_HUMAN	0.0593544	0.240184	0.637312	-0.0823318	0.0885879	0.322516	Scaling	Scaling	Buffering	Buffering
633	ASPM	ASPM	0.000480996	0.315827	0.381367	-0.0936091	0.001124	0.409436	sp.Q8IZT6.ASPM_HUMAN	0.533134	0.0505354	0.983409	0.00270723	0.727475	0.0478282	Scaling	Buffering	Buffering	Buffering
634	ASPSCR1	ASPSCR1	0.0428941	0.214896	0.0261469	-0.216526	0.000920911	0.431423	sp.Q9BZE9.ASPC1_HUMAN	0.00547386	0.280175	0.602499	-0.0521313	0.00975461	0.332306	Buffering	Buffering	Scaling	Buffering
635	ASRGL1	ASRGL1	0.175643	-0.318259	0.0176836	-0.464117	0.578113	0.145858	sp.Q7L266.ASGL1_HUMAN	0.140071	-0.337761	0.0101732	-0.447665	0.652717	0.109905	Anti-Scaling	Scaling	Anti-Scaling	Scaling
636	ASS1	ASS1	0.223265	0.548471	0.896236	-0.0452067	0.241069	0.593678	sp.P00966.ASSY_HUMAN	0.443582	0.194169	0.941333	-0.0141648	0.466595	0.208334	Scaling	Buffering	Buffering	Buffering
637	ASXL1	ASXL1	6.57117e-06	0.327142	0.766001	0.0554397	0.158815	0.271703	sp.Q8IXJ9.ASXL1_HUMAN	0.222576	0.105626	0.51134	-0.104389	0.207188	0.210015	Scaling	Buffering	Buffering	Buffering
638	ASXL2	ASXL2	0.00286733	0.2665	0.210008	-0.100145	0.000831147	0.366646	sp.Q76L83.ASXL2_HUMAN	0.00455868	0.204557	0.567055	0.0426025	0.0821863	0.161955	Scaling	Buffering	Buffering	Buffering
639	ASXL3	ASXL3	0.0709384	0.58565	0.0186364	-0.118081	0.0323033	0.703731	sp.Q9C0F0.ASXL3_HUMAN	0.871685	0.038127	0.71978	0.0307278	0.974675	0.0073992	Scaling	Buffering	Buffering	Buffering
640	ATAD1	ATAD1	0.000864677	0.388308	1.06754e-05	-0.441791	7.2844e-09	0.830099	sp.Q8NBU5.ATAD1_HUMAN	0.35044	0.140319	0.000576586	-0.250971	0.0147694	0.39129	Scaling	Scaling	Buffering	Scaling
641	ATAD2	ATAD2	0.00107381	0.319027	0.0482098	-0.232884	3.84327e-05	0.551911	sp.Q6PL18.ATAD2_HUMAN	0.0335812	0.204471	0.779429	-0.0410273	0.111053	0.245498	Scaling	Buffering	Buffering	Buffering
642	ATAD2B	ATAD2B	0.140379	0.133618	0.000464854	-0.328002	0.00012103	0.46162	sp.Q9ULI0.2.ATD2B_HUMAN	0.439848	0.0880325	0.452959	-0.0851276	0.242214	0.17316	Buffering	Scaling	Buffering	Buffering
643	ATAD3A	ATAD3A	0.0530359	0.278148	0.00544523	-0.219964	0.00164048	0.498112	tr.H0Y2W2.H0Y2W2_HUMAN	0.125318	0.137588	0.203957	-0.0896322	0.0316048	0.22722	Scaling	Buffering	Buffering	Buffering
644	ATAD3B	ATAD3B	0.192447	0.220322	0.00575353	-0.336686	0.00501547	0.557007	sp.Q5T9A4.ATD3B_HUMAN	0.20267	0.133111	0.00330866	-0.21365	0.00404955	0.346762	Buffering	Scaling	Buffering	Buffering
645	ATAD3C	ATAD3C	0.454453	-0.108714	0.416369	0.109254	0.220514	-0.217969	sp.Q5T2N8.ATD3C_HUMAN	0.301927	0.101223	0.653103	-0.0307823	0.222705	0.132005	Anti-Scaling	Anti-Scaling	Buffering	Buffering
646	ATAD5	ATAD5	0.519508	0.0600601	0.00276185	-0.312488	0.00353091	0.372548	sp.Q96QE3.ATAD5_HUMAN	0.61443	-0.0647446	0.236688	-0.129072	0.672963	0.0643278	Buffering	Scaling	Buffering	Buffering
647	ATAT1	ATAT1	0.0305524	0.293296	4.2978e-05	-0.421291	7.28289e-06	0.714587	sp.Q5SQI0.ATAT_HUMAN	0.0126052	0.404286	0.0780467	-0.218845	0.000976457	0.623131	Scaling	Scaling	Scaling	Buffering
648	ATE1	ATE1	0.401793	0.111114	1.2007e-09	-0.409469	0.000630853	0.520583	sp.O95260.ATE1_HUMAN	0.408474	0.126122	0.00241335	-0.232727	0.0296224	0.358849	Buffering	Scaling	Buffering	Buffering
649	ATF1	ATF1	0.0575265	0.159912	0.000469306	-0.244524	8.93775e-05	0.404436	sp.P18846.ATF1_HUMAN	0.00532237	0.354464	0.0716546	-0.226934	0.000399235	0.581398	Buffering	Buffering	Scaling	Buffering
650	ATF2	ATF2	4.41709e-06	0.391297	8.06991e-05	-0.331789	1.26463e-10	0.723086	sp.P15336.ATF2_HUMAN	0.255429	0.111017	0.0371216	-0.179269	0.0119311	0.290287	Scaling	Scaling	Buffering	Buffering
651	ATF3	ATF3	0.537948	0.109585	0.619	-0.109982	0.369949	0.219567	sp.P18847.ATF3_HUMAN	0.361991	0.168469	0.390298	-0.165932	0.158741	0.334401	Buffering	Buffering	Buffering	Buffering
652	ATF4	ATF4	0.172748	0.162477	2.39734e-09	-0.397404	6.36573e-05	0.559881	sp.P18848.ATF4_HUMAN	0.470733	0.231908	0.18473	-0.238444	0.161019	0.470353	Buffering	Scaling	Buffering	Buffering
653	ATF6	ATF6	0.0353025	0.137576	0.0128872	-0.216518	0.000288009	0.354094	sp.P18850.ATF6A_HUMAN	0.51288	0.0508735	0.231352	-0.152317	0.132157	0.20319	Buffering	Buffering	Buffering	Buffering
654	ATF6B	ATF6B	0.000661876	0.35376	0.00121796	-0.295677	6.17471e-07	0.649436	sp.Q99941.ATF6B_HUMAN	0.112003	0.194191	0.126664	-0.187783	0.0183309	0.381974	Scaling	Scaling	Buffering	Buffering
655	ATF7	ATF7	0.647427	0.0423484	0.00248672	-0.2133	0.0193826	0.255648	sp.P17544.6.ATF7_HUMAN	0.0127929	0.281539	0.00424071	-0.27911	5.78059e-05	0.560648	Buffering	Buffering	Scaling	Scaling
656	ATF7IP	ATF7IP	0.00062087	0.315129	0.0309974	-0.178375	6.2322e-06	0.493504	sp.Q6VMQ6.MCAF1_HUMAN	0.00424172	0.261818	0.0322338	-0.199137	6.52456e-05	0.460954	Scaling	Buffering	Scaling	Buffering
657	ATG101	ATG101	0.797873	0.0247265	0.0791913	-0.142913	0.153196	0.167639	sp.Q9BSB4.ATGA1_HUMAN	0.511674	0.0597973	0.793204	0.0205835	0.723645	0.0392139	Buffering	Buffering	Buffering	Buffering
658	ATG12	ATG12	2.31246e-05	0.590119	8.33849e-07	-0.380539	1.06476e-09	0.970658	sp.O94817.ATG12_HUMAN	0.0245858	0.398573	0.281568	-0.11855	0.00534751	0.517122	Scaling	Scaling	Scaling	Buffering
659	ATG13	ATG13	4.99268e-06	0.412518	0.0757633	-0.144711	4.43914e-07	0.557228	sp.O75143.2.ATG13_HUMAN	0.554886	-0.0813807	0.0221277	-0.18397	0.492255	0.10259	Scaling	Buffering	Buffering	Buffering
660	ATG14	ATG14	7.43802e-05	0.321117	1.04495e-07	-0.35159	4.97345e-12	0.672707	sp.Q6ZNE5.BAKOR_HUMAN	0.283889	0.0976641	0.725291	-0.0264243	0.195952	0.124088	Scaling	Scaling	Buffering	Buffering
661	ATG16L1	ATG16L1	0.00121603	0.383083	0.0673651	-0.168026	7.41206e-05	0.551109	sp.Q676U5.A16L1_HUMAN	0.0167095	0.178768	0.0980061	-0.12237	0.00136889	0.301138	Scaling	Buffering	Buffering	Buffering
662	ATG2A	ATG2A	0.0179087	0.193576	0.383505	-0.0541259	0.00775063	0.247702	sp.Q2TAZ0.3.ATG2A_HUMAN	0.0656628	0.148202	0.47209	-0.0550454	0.0307637	0.203248	Buffering	Buffering	Buffering	Buffering
663	ATG2B	ATG2B	0.0359671	0.224952	6.47543e-07	-0.392458	1.07218e-06	0.61741	sp.Q96BY7.ATG2B_HUMAN	0.0834439	0.153729	0.0249295	-0.149816	0.00258989	0.303544	Buffering	Scaling	Buffering	Buffering
664	ATG3	ATG3	0.0119355	0.191799	0.00298657	-0.298673	4.72425e-05	0.490472	sp.Q9NT62.ATG3_HUMAN	0.778603	-0.0327728	0.0311203	-0.288206	0.113427	0.255433	Buffering	Scaling	Buffering	Scaling
665	ATG4B	ATG4B	0.176941	0.138191	0.00486334	-0.209217	0.00396232	0.347408	sp.Q9Y4P1.2.ATG4B_HUMAN	0.601767	0.0628875	0.192005	-0.136915	0.172556	0.199802	Buffering	Buffering	Buffering	Buffering
666	ATG4C	ATG4C	0.00195194	0.284688	3.92046e-08	-0.38109	3.59859e-09	0.665779	sp.Q96DT6.ATG4C_HUMAN	0.733269	0.0404932	0.00161578	-0.239042	0.0332204	0.279536	Scaling	Scaling	Buffering	Buffering
667	ATG5	ATG5	0.0171125	0.274535	4.07835e-07	-0.320439	1.06536e-05	0.594974	sp.Q9H1Y0.ATG5_HUMAN	0.797873	0.0315008	2.50501e-05	-0.259839	0.0262813	0.29134	Scaling	Scaling	Buffering	Scaling
668	ATG7	ATG7	0.00543972	0.455429	2.13886e-05	-0.318399	3.81444e-05	0.773828	sp.O95352.ATG7_HUMAN	0.0647145	0.311393	2.05294e-05	-0.339968	0.000591235	0.651362	Scaling	Scaling	Scaling	Scaling
669	ATG9A	ATG9A	0.00472944	0.321224	0.324731	-0.0858922	0.00223515	0.407116	sp.Q7Z3C6.ATG9A_HUMAN	0.0387866	0.250779	0.530329	-0.0485369	0.0251706	0.299316	Scaling	Buffering	Scaling	Buffering
670	ATG9B	ATG9B	0.866776	0.0231121	0.479393	-0.142316	0.427792	0.165428	sp.Q674R7.ATG9B_HUMAN	0.446822	-0.095439	0.0361851	-0.353711	0.120314	0.258272	Buffering	Buffering	Buffering	Scaling
671	ATIC	ATIC	0.0016107	0.314522	0.000178335	-0.301147	5.05049e-07	0.61567	sp.P31939.PUR9_HUMAN	0.0340317	0.26514	5.1243e-05	-0.379298	1.77831e-05	0.644437	Scaling	Scaling	Scaling	Scaling
672	ATL1	ATL1	0.240684	0.21264	0.971908	-0.00456817	0.280434	0.217209	sp.Q8WXF7.ATLA1_HUMAN	0.222178	0.221133	0.83156	0.0312286	0.358122	0.189904	Buffering	Buffering	Buffering	Buffering
673	ATL2	ATL2	2.57734e-05	0.285877	0.0727821	-0.168994	3.55184e-05	0.454871	sp.Q8NHH9.ATLA2_HUMAN	0.000688682	0.275702	0.579966	-0.0476784	0.00310005	0.32338	Scaling	Buffering	Scaling	Buffering
674	ATL3	ATL3	0.386259	0.132221	0.915133	0.0105669	0.449528	0.121654	sp.Q6DD88.ATLA3_HUMAN	0.246336	0.159792	0.713475	0.0369772	0.416947	0.122815	Buffering	Buffering	Buffering	Buffering
675	ATM	ATM	0.0858004	0.204107	1.14858e-05	-0.533699	1.72939e-06	0.737806	sp.Q13315.ATM_HUMAN	0.0107345	0.254519	0.00233652	-0.306485	5.50798e-06	0.561003	Buffering	Scaling	Scaling	Scaling
676	ATN1	ATN1	0.00346228	0.346792	0.000184532	-0.397108	2.02024e-07	0.7439	sp.P54259.ATN1_HUMAN	0.00585392	0.266253	0.0107905	-0.196268	3.43525e-05	0.46252	Scaling	Scaling	Scaling	Buffering
677	ATOX1	ATOX1	0.000448212	0.68277	0.26659	-0.15113	0.000158677	0.8339	sp.O00244.ATOX1_HUMAN	0.0160748	0.463885	0.279543	-0.166105	0.00500947	0.62999	Scaling	Buffering	Scaling	Buffering
678	ATP11A	ATP11A	1.09975e-05	0.742553	0.054007	-0.279829	1.0549e-08	1.02238	tr.E9PEJ6.E9PEJ6_HUMAN	0.0203095	0.401433	0.123058	-0.149736	0.00166129	0.551169	Scaling	Scaling	Scaling	Buffering
679	ATP11B	ATP11B	0.000228881	0.301521	0.0347545	-0.332743	0.000167703	0.634263	sp.Q9Y2G3.AT11B_HUMAN	0.0324462	0.156947	0.673194	0.0374129	0.241547	0.119534	Scaling	Scaling	Buffering	Buffering
680	ATP12A	ATP12A	0.034364	-0.0617909	0.0542646	-0.0416908	0.436241	-0.0201001	sp.P54707.2.AT12A_HUMAN	0.399531	0.109569	0.74032	0.0252659	0.506731	0.0843029	Buffering	Buffering	Buffering	Buffering
681	ATP13A1	ATP13A1	0.000422059	0.506873	2.97274e-11	-0.446767	5.26796e-08	0.953641	sp.Q9HD20.AT131_HUMAN	0.583745	0.0991396	1.3442e-05	-0.293508	0.0384528	0.392648	Scaling	Scaling	Buffering	Scaling
682	ATP13A2	ATP13A2	0.00535098	0.431988	0.8885	-0.0137049	0.00734757	0.445693	sp.Q9NQ11.AT132_HUMAN	0.00397339	0.481524	0.835316	-0.0225877	0.00437066	0.504111	Scaling	Buffering	Scaling	Buffering
683	ATP13A3	ATP13A3	0.000166257	0.341788	0.0497357	-0.238615	5.31955e-05	0.580403	sp.Q9H7F0.AT133_HUMAN	0.00720809	0.227212	0.816616	-0.0217844	0.0249163	0.248996	Scaling	Buffering	Buffering	Buffering
684	ATP1A1	ATP1A1	0.22863	0.233223	0.500399	0.0790666	0.460183	0.154156	sp.P05023.AT1A1_HUMAN	0.309117	-0.156987	0.339121	0.0825778	0.14486	-0.239564	Buffering	Buffering	Anti-Scaling	Buffering
685	ATP1A3	ATP1A3	0.841508	0.0464506	0.466697	-0.132422	0.476997	0.178873	sp.P13637.3.AT1A3_HUMAN	0.735	-0.0337025	0.692877	0.0327091	0.550266	-0.0664116	Buffering	Buffering	Buffering	Buffering
686	ATP1A4	ATP1A4	0.920373	-0.00577989	0.185774	-0.0533667	0.381155	0.0475868	sp.Q13733.AT1A4_HUMAN	0.655621	-0.0407386	0.389332	0.0867494	0.282343	-0.127488	Buffering	Buffering	Buffering	Buffering
687	ATP1B1	ATP1B1	0.99755	0.000742087	0.40431	-0.235226	0.462641	0.235968	sp.P05026.AT1B1_HUMAN	0.310044	-0.173077	0.566189	-0.119025	0.817553	-0.0540512	Buffering	Buffering	Anti-Scaling	Buffering
688	ATP1B3	ATP1B3	3.42467e-06	0.405098	0.024643	-0.282024	2.80875e-06	0.687122	sp.P54709.AT1B3_HUMAN	1.49152e-05	0.408	0.0573982	-0.209501	4.36513e-06	0.617501	Scaling	Scaling	Scaling	Buffering
689	ATP2A1	ATP2A1	0.0150886	0.490642	7.24574e-06	-0.378987	7.12468e-05	0.869629	sp.O14983.AT2A1_HUMAN	0.199573	0.794408	0.984916	0.00526907	0.217952	0.789139	Scaling	Scaling	Scaling	Buffering
690	ATP2A2	ATP2A2	0.0957772	0.196583	0.272692	-0.116265	0.0377947	0.312848	sp.P16615.AT2A2_HUMAN	0.0350924	0.220052	0.266703	-0.0863963	0.00978174	0.306448	Buffering	Buffering	Buffering	Buffering
691	ATP2A3	ATP2A3	0.844876	0.0704031	0.064438	0.438371	0.330805	-0.367968	sp.Q93084.2.AT2A3_HUMAN	0.0456138	0.545146	0.0102885	0.438268	0.701489	0.106878	Buffering	Anti-Scaling	Scaling	Anti-Scaling
692	ATP2B1	ATP2B1	0.376637	0.152443	0.0451338	-0.325734	0.032401	0.478177	sp.P20020.AT2B1_HUMAN	0.216299	0.148044	0.909128	0.0115754	0.340272	0.136469	Buffering	Scaling	Buffering	Buffering
693	ATP2B4	ATP2B4	0.140122	0.25617	0.345893	0.201623	0.821501	0.054547	sp.P23634.AT2B4_HUMAN	0.157999	0.200069	0.404981	0.144585	0.779425	0.0554848	Scaling	Anti-Scaling	Buffering	Anti-Scaling
694	ATP2C1	ATP2C1	1.49529e-08	0.437115	0.0547848	-0.213844	6.99881e-07	0.650959	sp.P98194.7.AT2C1_HUMAN	7.60334e-05	0.334527	0.802609	0.0292852	0.0213577	0.305242	Scaling	Buffering	Scaling	Buffering
695	ATP2C2	ATP2C2	0.235744	0.435724	0.422155	-0.155146	0.12412	0.59087	sp.O75185.AT2C2_HUMAN	0.741595	0.129683	0.102985	-0.377079	0.228217	0.506761	Scaling	Buffering	Buffering	Scaling
696	ATP5S	ATP5S	0.0199488	0.238612	8.90141e-06	-0.331544	1.74098e-06	0.570156	sp.Q99766.ATP5S_HUMAN	0.00415084	0.362412	0.0209017	-0.216725	8.77544e-05	0.579136	Buffering	Scaling	Scaling	Buffering
697	ATP6V0A1	ATP6V0A1	0.287809	0.148992	0.0124684	-0.381564	0.00467214	0.530556	sp.Q93050.3.VPP1_HUMAN	0.792125	0.0265263	7.66098e-05	-0.443537	0.000416405	0.470063	Buffering	Scaling	Buffering	Scaling
698	ATP6V0A2	ATP6V0A2	0.129578	-0.194987	0.591962	-0.0503564	0.330872	-0.14463	sp.Q9Y487.VPP2_HUMAN	0.975357	-0.00293265	0.552343	0.0450592	0.660092	-0.0479918	Anti-Scaling	Buffering	Buffering	Buffering
699	ATP6V0C	ATP6V0C	0.00109663	0.341194	0.00013781	-0.270693	4.01372e-07	0.611887	sp.P27449.VATL_HUMAN	0.345093	0.120142	0.000705455	-0.222052	0.0108639	0.342194	Scaling	Scaling	Buffering	Buffering
700	ATP6V0D1	ATP6V0D1	0.000312184	0.491095	9.98201e-05	-0.322731	1.9922e-07	0.813826	sp.P61421.VA0D1_HUMAN	0.316239	-0.0834748	0.686775	-0.0327579	0.601339	-0.0507169	Scaling	Scaling	Buffering	Buffering
701	ATP6V1A	ATP6V1A	0.00405251	0.256967	0.00769793	-0.25911	2.95333e-05	0.516078	sp.P38606.VATA_HUMAN	0.702873	0.0247809	0.243944	-0.0935829	0.190701	0.118364	Scaling	Scaling	Buffering	Buffering
702	ATP6V1B1	ATP6V1B1	0.147146	0.309223	0.863526	-0.0384934	0.224643	0.347716	sp.P15313.VATB1_HUMAN	0.351544	-0.0891814	0.385712	-0.0815576	0.95089	-0.00762379	Scaling	Buffering	Buffering	Buffering
703	ATP6V1B2	ATP6V1B2	0.000626261	0.619661	2.58872e-15	-0.726272	4.62255e-10	1.34593	sp.P21281.VATB2_HUMAN	0.0269622	0.24126	2.11629e-08	-0.338892	1.61107e-06	0.580152	Scaling	Scaling	Buffering	Scaling
704	ATP6V1C1	ATP6V1C1	4.8934e-07	0.388968	0.0448232	-0.277809	1.276e-05	0.666777	sp.P21283.VATC1_HUMAN	0.377375	0.0612347	0.00391416	-0.280233	0.00122997	0.341467	Scaling	Scaling	Buffering	Scaling
705	ATP6V1C2	ATP6V1C2	0.350276	-0.09472	0.00277633	-0.290751	0.0990401	0.196031	sp.Q8NEY4.VATC2_HUMAN	0.999702	-4.44616e-05	0.429992	-0.0893978	0.527019	0.0893534	Buffering	Scaling	Buffering	Buffering
706	ATP6V1D	ATP6V1D	0.00141155	0.358883	0.748151	-0.0291547	0.00249209	0.388037	sp.Q9Y5K8.VATD_HUMAN	0.968611	0.00397968	0.0550166	0.16365	0.170263	-0.15967	Scaling	Buffering	Buffering	Anti-Scaling
707	ATP6V1E1	ATP6V1E1	0.0193595	0.475367	0.000816704	-0.25726	0.000835771	0.732627	sp.P36543.VATE1_HUMAN	0.275623	0.172925	0.00332662	-0.160945	0.0431211	0.333869	Scaling	Scaling	Buffering	Buffering
708	ATP6V1F	ATP6V1F	9.82612e-14	0.545386	5.90063e-06	-0.552212	3.22758e-14	1.0976	sp.Q16864.2.VATF_HUMAN	0.0116651	0.160054	0.281317	-0.078794	0.00431593	0.238848	Scaling	Scaling	Buffering	Buffering
709	ATP6V1G1	ATP6V1G1	0.00407794	0.233746	4.44432e-05	-0.31008	8.40266e-08	0.543826	sp.O75348.VATG1_HUMAN	0.208533	-0.142396	0.479633	-0.0627698	0.529867	-0.0796257	Buffering	Scaling	Anti-Scaling	Buffering
710	ATP6V1G2	ATP6V1G2	0.920482	-0.011822	7.20687e-05	-0.375957	0.00421399	0.364135	sp.O95670.VATG2_HUMAN	0.858555	-0.0866991	0.173445	-0.678794	0.35615	0.592095	Buffering	Scaling	Buffering	Scaling
711	ATP6V1H	ATP6V1H	1.36343e-05	0.340938	0.000358202	-0.368628	4.75298e-09	0.709566	sp.Q9UI12.VATH_HUMAN	0.419155	-0.058187	0.007276	-0.28662	0.0450903	0.228433	Scaling	Scaling	Buffering	Scaling
712	ATP7B	ATP7B	0.363715	0.221866	0.0201484	-0.26114	0.0498104	0.483006	sp.P35670.ATP7B_HUMAN	0.475412	0.151104	0.0368373	-0.303102	0.0353773	0.454206	Buffering	Scaling	Buffering	Scaling
713	ATP8B1	ATP8B1	0.641277	0.244723	2.60771e-05	0.761128	0.321128	-0.516405	sp.O43520.AT8B1_HUMAN	0.425124	0.340729	0.00693596	0.35772	0.967512	-0.0169913	Buffering	Anti-Scaling	Scaling	Anti-Scaling
714	ATP9A	ATP9A	3.34103e-05	0.679856	0.456484	0.313099	0.385627	0.366757	sp.O75110.ATP9A_HUMAN	8.69522e-05	0.377605	0.473177	0.106772	0.0777368	0.270833	Scaling	Anti-Scaling	Scaling	Anti-Scaling
715	ATP9B	ATP9B	0.0397824	0.498969	0.000511409	-0.359122	0.00116884	0.85809	sp.O43861.ATP9B_HUMAN	0.149292	0.343314	0.705646	0.0282408	0.181242	0.315073	Scaling	Scaling	Scaling	Buffering
716	ATPAF1	ATPAF1	0.00573448	0.285694	0.0774763	-0.15636	0.000334464	0.442054	sp.Q5TC12.ATPF1_HUMAN	0.0455045	0.282603	0.597998	0.0417155	0.101486	0.240887	Scaling	Buffering	Scaling	Buffering
717	ATPAF2	ATPAF2	0.0721305	0.195051	1.66333e-10	-0.441007	6.58357e-07	0.636059	sp.Q8N5M1.ATPF2_HUMAN	0.180771	0.138661	0.000848357	-0.227876	0.0013312	0.366537	Buffering	Scaling	Buffering	Buffering
718	ATR	ATR	7.7395e-05	0.265812	7.43315e-06	-0.370137	2.27197e-10	0.635949	sp.Q13535.ATR_HUMAN	0.00291234	0.199512	0.0656593	-0.175113	0.000573353	0.374625	Scaling	Scaling	Buffering	Buffering
719	ATRAID	ATRAID	2.33994e-09	0.398404	0.0201022	-0.228854	7.00088e-08	0.627258	sp.Q6UW56.3.ARAID_HUMAN	0.000461656	0.360971	0.579143	-0.0711834	0.00397255	0.432154	Scaling	Buffering	Scaling	Buffering
720	ATRIP	ATRIP	0.0797763	0.245639	3.75457e-17	-0.495744	2.82323e-05	0.741383	sp.Q8WXE1.ATRIP_HUMAN	0.691013	0.0597177	0.860368	-0.00925337	0.649773	0.0689711	Buffering	Scaling	Buffering	Buffering
721	ATRN	ATRN	1.03458e-10	0.652974	5.88364e-05	-0.398061	3.75896e-18	1.05104	sp.O75882.ATRN_HUMAN	5.98423e-07	0.435757	0.00571226	-0.234153	2.9869e-11	0.66991	Scaling	Scaling	Scaling	Buffering
722	ATXN1	ATXN1	0.234548	0.21946	0.831423	-0.0251229	0.209242	0.244583	sp.P54253.ATX1_HUMAN	0.787268	0.0465368	0.92116	0.0112398	0.849194	0.0352971	Buffering	Buffering	Buffering	Buffering
723	ATXN10	ATXN10	0.0124442	0.31778	1.2169e-05	-0.3487	5.93153e-06	0.666481	sp.Q9UBB4.ATX10_HUMAN	0.668908	0.069233	5.38188e-07	-0.350017	0.0156459	0.41925	Scaling	Scaling	Buffering	Scaling
724	ATXN1L	ATXN1L	0.00205429	0.367259	4.77833e-09	-0.404524	4.10931e-08	0.771783	sp.P0C7T5.ATX1L_HUMAN	0.0543806	0.166202	0.0264035	-0.149641	0.00110802	0.315843	Scaling	Scaling	Buffering	Buffering
725	ATXN2	ATXN2	0.0467708	0.222529	0.000267997	-0.270877	0.00015905	0.493406	sp.Q99700.ATX2_HUMAN	0.0105854	0.213542	0.00526881	-0.204655	6.05432e-05	0.418197	Buffering	Scaling	Buffering	Buffering
726	ATXN2	ATXN2	0.0467708	0.222529	0.000267997	-0.270877	0.00015905	0.493406	tr.F8WB05.F8WB05_HUMAN	0.799809	0.0657893	0.274631	-0.236677	0.330791	0.302467	Buffering	Scaling	Buffering	Buffering
727	ATXN2L	ATXN2L	0.000369779	0.384989	0.000161874	-0.266701	1.74732e-07	0.65169	sp.Q8WWM7.ATX2L_HUMAN	0.00103313	0.34714	0.0364877	-0.133423	2.85871e-05	0.480562	Scaling	Scaling	Scaling	Buffering
728	ATXN3	ATXN3	1.45293e-06	0.525096	3.20969e-08	-0.470628	1.25263e-13	0.995724	sp.P54252.2.ATX3_HUMAN	0.089176	0.188847	0.000362902	-0.258685	0.000308606	0.447533	Scaling	Scaling	Buffering	Scaling
729	ATXN7	ATXN7	0.1794	0.239154	4.74528e-11	-0.420658	0.00134551	0.659811	sp.O15265.2.ATX7_HUMAN	0.218423	0.0992732	0.0034226	-0.204237	0.00176009	0.30351	Buffering	Scaling	Buffering	Buffering
730	ATXN7L1	ATXN7L1	0.000545877	0.297848	0.000122373	-0.366979	2.15341e-09	0.664827	sp.Q9ULK2.AT7L1_HUMAN	0.812224	0.0334344	0.343836	-0.13262	0.335769	0.166055	Scaling	Scaling	Buffering	Buffering
731	ATXN7L2	ATXN7L2	0.0010941	0.509188	0.00652511	-0.245429	1.54136e-05	0.754617	sp.Q5T6C5.AT7L2_HUMAN	0.0872452	0.86804	0.0334176	0.534708	0.508571	0.333332	Scaling	Buffering	Scaling	Anti-Scaling
732	ATXN7L3	ATXN7L3	0.00186235	0.254369	0.00291304	-0.202487	3.29569e-06	0.456856	sp.Q14CW9.2.AT7L3_HUMAN	0.762841	0.0395134	0.43606	-0.0746985	0.453054	0.114212	Scaling	Buffering	Buffering	Buffering
733	ATXN7L3B	ATXN7L3B	0.0396025	0.235149	4.77262e-07	-0.422798	2.16463e-06	0.657946	sp.Q96GX2.A7L3B_HUMAN	0.613762	0.109198	0.0103933	-0.390412	0.042065	0.49961	Buffering	Scaling	Buffering	Scaling
734	AUH	AUH	0.000991952	0.320009	6.11797e-07	-0.386506	1.03862e-09	0.706516	sp.Q13825.AUHM_HUMAN	0.00442154	0.334473	0.028274	-0.203048	3.30867e-05	0.537521	Scaling	Scaling	Scaling	Buffering
735	AUP1	AUP1	4.5847e-05	0.239422	0.00446807	-0.20913	5.29912e-07	0.448552	sp.Q9Y679.AUP1_HUMAN	0.00442479	0.284562	0.0348863	-0.184193	0.000140241	0.468756	Buffering	Buffering	Scaling	Buffering
736	AURKA	AURKA	3.22365e-12	0.52523	0.610158	-0.0751885	0.000400168	0.600419	sp.O14965.AURKA_HUMAN	3.67208e-06	0.382715	0.132043	-0.196358	8.71836e-05	0.579073	Scaling	Buffering	Scaling	Buffering
737	AURKAIP1	AURKAIP1	0.0571645	0.210453	0.0229452	-0.143928	0.00361103	0.354382	sp.Q9NWT8.AKIP_HUMAN	0.155692	0.168388	0.752657	-0.0235474	0.133207	0.191936	Buffering	Buffering	Buffering	Buffering
738	AURKB	AURKB	0.321054	0.13351	3.1211e-09	-0.473879	5.45265e-05	0.607389	sp.Q96GD4.AURKB_HUMAN	0.84234	0.0330241	0.374337	-0.0889566	0.482099	0.121981	Buffering	Scaling	Buffering	Buffering
739	AUTS2	AUTS2	0.151454	0.321771	0.727709	0.107106	0.511611	0.214665	sp.Q8WXX7.AUTS2_HUMAN	0.0453737	-0.366888	0.562163	-0.163766	0.479071	-0.203122	Scaling	Anti-Scaling	Anti-Scaling	Buffering
740	AVEN	AVEN	0.0895164	0.236159	0.0426219	-0.157714	0.0094866	0.393873	sp.Q9NQS1.AVEN_HUMAN	0.683827	0.0591944	0.00449587	-0.268105	0.0382411	0.327299	Buffering	Buffering	Buffering	Scaling
741	AVL9	AVL9	1.78252e-11	0.439375	3.07897e-08	-0.562572	9.39062e-17	1.00195	sp.Q8NBF6.AVL9_HUMAN	1.79086e-05	0.308135	0.0167959	-0.312283	7.38404e-06	0.620418	Scaling	Scaling	Scaling	Scaling
742	AXIN1	AXIN1	0.000171165	0.463032	8.17499e-07	-0.379947	6.85374e-09	0.842979	sp.O15169.AXIN1_HUMAN	0.0377248	0.206572	0.159333	-0.0973172	0.00467421	0.303889	Scaling	Scaling	Buffering	Buffering
743	AXL	AXL	0.692663	-0.159431	0.641177	0.167579	0.48626	-0.327009	sp.P30530.UFO_HUMAN	0.658214	0.112268	0.338406	0.186317	0.794517	-0.074049	Anti-Scaling	Anti-Scaling	Buffering	Anti-Scaling
744	AZGP1	AZGP1	0.0719258	0.462673	0.807236	-0.0864734	0.150685	0.549146	sp.P25311.ZA2G_HUMAN	0.669723	0.0862642	0.449446	-0.200911	0.293147	0.287175	Scaling	Buffering	Buffering	Buffering
745	AZI2	AZI2	0.00909965	0.349483	2.34209e-08	-0.369552	8.83869e-06	0.719035	sp.Q9H6S1.AZI2_HUMAN	0.0977707	0.478563	0.000347374	-0.281245	0.0163249	0.759808	Scaling	Scaling	Scaling	Scaling
746	B2M	B2M	0.55578	0.126969	0.0363459	-0.293392	0.0699741	0.420362	sp.P61769.B2MG_HUMAN	0.704605	0.109463	0.429663	-0.122585	0.445369	0.232048	Buffering	Scaling	Buffering	Buffering
747	B3GALNT2	B3GALNT2	0.000547842	0.224224	0.0119972	-0.30262	6.2516e-05	0.526844	sp.Q8NCR0.B3GL2_HUMAN	0.285368	0.112346	0.917097	0.0182876	0.597114	0.0940586	Buffering	Scaling	Buffering	Buffering
748	B3GALT6	B3GALT6	0.00106516	0.441935	0.011452	-0.213577	1.3027e-05	0.655512	sp.Q96L58.B3GT6_HUMAN	0.180285	0.203304	0.885904	-0.0127605	0.186839	0.216064	Scaling	Buffering	Buffering	Buffering
749	B3GAT3	B3GAT3	0.245087	-0.115933	0.26479	-0.097819	0.875835	-0.018114	sp.O94766.B3GA3_HUMAN	0.523383	-0.0611259	0.161412	0.107774	0.115715	-0.1689	Anti-Scaling	Buffering	Buffering	Anti-Scaling
750	B3GNT2	B3GNT2	0.279172	0.126981	0.0654936	-0.247025	0.0243557	0.374005	sp.Q9NY97.B3GN2_HUMAN	0.481663	0.0732316	0.926395	-0.0110246	0.56256	0.0842562	Buffering	Buffering	Buffering	Buffering
751	B3GNT3	B3GNT3	0.0048544	-1.11359	0.00495314	0.667413	5.11663e-05	-1.781	sp.Q9Y2A9.B3GN3_HUMAN	0.0950528	-0.914336	0.137277	0.402591	0.02041	-1.31693	Anti-Scaling	Anti-Scaling	Anti-Scaling	Anti-Scaling
752	B3GNTL1	B3GNTL1	0.0485568	0.277639	0.0935709	-0.245939	0.00503984	0.523578	sp.Q67FW5.B3GNL_HUMAN	0.209212	-0.226573	0.302871	-0.157339	0.741001	-0.0692338	Scaling	Buffering	Anti-Scaling	Buffering
753	B4GALNT1	B4GALNT1	0.534291	-0.217644	0.800338	-0.0699842	0.719805	-0.147659	sp.Q00973.B4GN1_HUMAN	0.898286	-0.0376997	0.0631537	0.531927	0.122267	-0.569626	Anti-Scaling	Buffering	Buffering	Anti-Scaling
754	B4GALNT3	B4GALNT3	0.201888	0.268578	0.401474	-0.150389	0.0783445	0.418967	sp.Q6L9W6.B4GN3_HUMAN	0.31554	-0.439775	0.0745882	-0.907054	0.354813	0.467279	Scaling	Buffering	Anti-Scaling	Scaling
755	B4GALT1	B4GALT1	0.0088298	0.61366	0.746174	-0.0381394	0.00544726	0.6518	sp.P15291.B4GT1_HUMAN	0.126118	0.306203	0.378277	0.0835498	0.2527	0.222653	Scaling	Buffering	Scaling	Buffering
756	B4GALT3	B4GALT3	2.51914e-06	0.375335	0.000109717	-0.523695	9.18355e-09	0.89903	sp.O60512.B4GT3_HUMAN	0.0181695	0.210581	0.0228474	-0.246241	0.000389683	0.456822	Scaling	Scaling	Buffering	Buffering
757	B4GALT4	B4GALT4	0.00691969	0.308768	0.0235675	-0.401236	0.000335377	0.710004	sp.O60513.B4GT4_HUMAN	0.0902675	0.238997	0.0516042	-0.348642	0.00550017	0.587639	Scaling	Scaling	Buffering	Scaling
758	B4GALT5	B4GALT5	6.05802e-09	0.509997	0.604793	-0.0990966	0.00397939	0.609093	sp.O43286.B4GT5_HUMAN	2.17725e-05	0.551087	0.360878	-0.441558	0.0523799	0.992645	Scaling	Buffering	Scaling	Scaling
759	B4GALT7	B4GALT7	3.94299e-07	0.488947	0.565013	-0.0472515	2.25294e-06	0.536199	sp.Q9UBV7.B4GT7_HUMAN	0.0160147	0.244361	0.644139	-0.0317341	0.0150196	0.276095	Scaling	Buffering	Buffering	Buffering
760	B9D2	B9D2	0.00144835	0.330659	3.89784e-08	-0.423934	2.21988e-10	0.754593	sp.Q9BPU9.B9D2_HUMAN	0.154078	0.495208	0.991392	0.00229194	0.184156	0.492916	Scaling	Scaling	Scaling	Buffering
761	BABAM1	BABAM1	4.53981e-06	0.406515	8.77993e-06	-0.247828	3.24389e-10	0.654342	sp.Q9NWV8.BABA1_HUMAN	0.0449798	0.256714	0.209095	-0.0725369	0.014095	0.329251	Scaling	Buffering	Scaling	Buffering
762	BACE1	BACE1	0.853584	-0.031794	0.88334	-0.0208626	0.95416	-0.0109315	sp.P56817.BACE1_HUMAN	0.843645	-0.0554308	0.0446711	-0.540789	0.153313	0.485358	Buffering	Buffering	Buffering	Scaling
763	BACE2	BACE2	0.707831	0.153319	0.302591	-0.249799	0.333647	0.403118	sp.Q9Y5Z0.BACE2_HUMAN	0.399075	0.199972	0.284389	-0.152246	0.160499	0.352218	Buffering	Buffering	Buffering	Buffering
764	BACH1	BACH1	0.00193653	0.483509	0.0013911	-0.282089	8.38586e-06	0.765598	sp.O14867.BACH1_HUMAN	0.000162082	0.552601	0.460527	-0.0597341	6.99844e-05	0.612335	Scaling	Scaling	Scaling	Buffering
765	BAD	BAD	0.521607	0.0763046	0.0547796	-0.175117	0.0640554	0.251422	sp.Q92934.BAD_HUMAN	0.0901942	0.185595	0.105823	-0.137312	0.00843116	0.322907	Buffering	Buffering	Buffering	Buffering
766	BAG1	BAG1	0.34742	0.161849	0.000177683	-0.344624	0.00564613	0.506473	sp.Q99933.BAG1_HUMAN	0.976892	-0.00529757	0.0014659	-0.309423	0.100725	0.304125	Buffering	Scaling	Buffering	Scaling
767	BAG2	BAG2	0.0127915	0.414966	0.000570205	-0.463446	9.58e-06	0.878412	sp.O95816.BAG2_HUMAN	0.0283914	0.366572	0.00116306	-0.521493	2.24658e-05	0.888064	Scaling	Scaling	Scaling	Scaling
768	BAG3	BAG3	0.0804602	0.345736	0.237609	-0.147176	0.0201368	0.492913	sp.O95817.BAG3_HUMAN	0.355737	0.204353	0.298976	-0.110408	0.171342	0.314761	Scaling	Buffering	Buffering	Buffering
769	BAG4	BAG4	0.0622528	0.210774	3.91256e-06	-0.331659	2.51873e-05	0.542433	sp.O95429.BAG4_HUMAN	0.0625107	0.245547	0.000197156	-0.312687	0.000107121	0.558234	Buffering	Scaling	Buffering	Scaling
770	BAG5	BAG5	8.67427e-05	0.307118	5.60156e-06	-0.301632	3.39812e-10	0.60875	sp.Q9UL15.2.BAG5_HUMAN	3.31904e-05	0.268665	4.47603e-05	-0.238537	9.28268e-11	0.507203	Scaling	Scaling	Scaling	Buffering
771	BAG6	BAG6	4.59727e-07	0.427092	2.48885e-05	-0.324641	4.96609e-12	0.751733	sp.P46379.3.BAG6_HUMAN	0.0176662	0.154682	0.0750287	-0.0925689	0.00119297	0.247251	Scaling	Scaling	Buffering	Buffering
772	BAHCC1	BAHCC1	0.820575	-0.0448719	0.000502979	-0.747356	0.00743066	0.702484	sp.Q9P281.BAHC1_HUMAN	0.743662	0.0717085	0.320196	-0.326903	0.259535	0.398611	Buffering	Scaling	Buffering	Scaling
773	BAHD1	BAHD1	0.55271	0.0914654	0.00788135	-0.185848	0.0895595	0.277314	sp.Q8TBE0.BAHD1_HUMAN	0.52276	-0.12861	0.323371	-0.0883152	0.846533	-0.0402948	Buffering	Buffering	Anti-Scaling	Buffering
774	BAIAP2	BAIAP2	0.212268	0.232898	0.302441	0.197938	0.88274	0.0349593	sp.Q9UQB8.5.BAIP2_HUMAN	0.921171	-0.0149913	0.367634	0.14599	0.416256	-0.160982	Buffering	Anti-Scaling	Buffering	Anti-Scaling
775	BAIAP2	BAIAP2	0.212268	0.232898	0.302441	0.197938	0.88274	0.0349593	tr.I3L3C6.I3L3C6_HUMAN	0.60791	0.119617	0.278186	0.24518	0.672822	-0.125563	Buffering	Anti-Scaling	Buffering	Anti-Scaling
776	BAIAP2L1	BAIAP2L1	0.141292	0.25362	0.826608	0.0500302	0.378954	0.20359	sp.Q9UHR4.BI2L1_HUMAN	0.740272	0.0474158	0.840188	-0.0404672	0.661428	0.087883	Scaling	Buffering	Buffering	Buffering
777	BAK1	BAK1	0.427592	0.0766158	0.000453136	-0.287808	0.00189567	0.364424	sp.Q16611.BAK_HUMAN	0.870558	0.024947	0.0780816	-0.195791	0.208678	0.220738	Buffering	Scaling	Buffering	Buffering
778	BANF1	BANF1	0.00706946	0.20888	0.721249	-0.0290685	0.0202163	0.237948	sp.O75531.BAF_HUMAN	0.00440545	0.225047	0.639671	-0.0350805	0.00496438	0.260128	Buffering	Buffering	Buffering	Buffering
779	BANP	BANP	0.0518824	0.254496	5.38648e-05	-0.232335	0.000631641	0.486832	sp.Q8N9N5.BANP_HUMAN	0.314497	0.067159	0.371151	-0.0496172	0.110022	0.116776	Scaling	Buffering	Buffering	Buffering
780	BAP1	BAP1	0.0330163	0.354009	2.43283e-16	-0.516372	2.36866e-05	0.870381	sp.Q92560.BAP1_HUMAN	0.295992	0.12368	0.637553	0.0233145	0.385188	0.100365	Scaling	Scaling	Buffering	Buffering
781	BARD1	BARD1	0.83552	0.0236105	0.0183949	-0.212449	0.0754757	0.236059	sp.Q99728.BARD1_HUMAN	0.923088	0.0111772	0.953253	0.00464409	0.959771	0.00653307	Buffering	Buffering	Buffering	Buffering
782	BASP1	BASP1	0.00105544	1.07433	0.285541	-0.590815	0.00519098	1.66515	sp.P80723.BASP1_HUMAN	0.00213949	0.834322	0.576932	-0.276892	0.032294	1.11121	Scaling	Scaling	Scaling	Scaling
783	BAX	BAX	0.453541	-0.0825165	6.21418e-06	-0.419748	0.0052884	0.337232	sp.Q07812.2.BAX_HUMAN	0.742074	0.032752	0.000793676	-0.300302	0.0043299	0.333054	Buffering	Scaling	Buffering	Scaling
784	BAZ1A	BAZ1A	0.0132256	0.278995	9.27437e-08	-0.49814	1.62273e-08	0.777135	sp.Q9NRL2.BAZ1A_HUMAN	0.0145424	0.271909	4.40274e-07	-0.390145	2.95625e-07	0.662055	Scaling	Scaling	Scaling	Scaling
785	BAZ1B	BAZ1B	6.64684e-05	0.285174	0.000249604	-0.313164	1.08809e-09	0.598337	sp.Q9UIG0.BAZ1B_HUMAN	0.0844074	0.107665	0.0397786	-0.193943	0.00361518	0.301608	Scaling	Scaling	Buffering	Buffering
786	BAZ2A	BAZ2A	0.118906	0.179346	0.0021724	-0.284461	0.00101567	0.463807	sp.Q9UIF9.BAZ2A_HUMAN	0.0484527	0.153854	0.298763	-0.0684596	0.0165366	0.222313	Buffering	Scaling	Buffering	Buffering
787	BAZ2B	BAZ2B	0.0461017	0.333926	6.84925e-05	-0.448388	5.44252e-05	0.782314	sp.Q9UIF8.4.BAZ2B_HUMAN	0.00109607	0.380034	0.00898728	-0.205521	6.68785e-06	0.585555	Scaling	Scaling	Scaling	Buffering
788	BBC3	BBC3	0.0105024	-0.383568	4.50183e-06	-0.557584	0.281414	0.174016	sp.Q9BXH1.BBC3_HUMAN	0.865355	-0.0297886	0.0115967	-0.326643	0.106657	0.296855	Anti-Scaling	Scaling	Buffering	Scaling
789	BBS1	BBS1	0.129079	0.151589	0.342578	-0.0855458	0.0516389	0.237134	sp.Q8NFJ9.2.BBS1_HUMAN	0.896888	-0.024864	0.474947	-0.103768	0.67822	0.0789041	Buffering	Buffering	Buffering	Buffering
790	BBS2	BBS2	7.06194e-06	0.541533	4.72236e-07	-0.396389	2.80882e-11	0.937922	sp.Q9BXC9.BBS2_HUMAN	0.515649	0.143958	0.388598	0.125076	0.937225	0.0188821	Scaling	Scaling	Buffering	Anti-Scaling
791	BBS9	BBS9	4.75295e-06	0.346674	0.00110296	-0.350046	4.62554e-09	0.696719	sp.Q3SYG4.3.PTHB1_HUMAN	0.526722	0.0721917	0.439233	0.104811	0.815564	-0.0326195	Scaling	Scaling	Buffering	Anti-Scaling
792	BBX	BBX	0.444984	0.0823403	0.611644	-0.0637624	0.328055	0.146103	sp.Q8WY36.BBX_HUMAN	0.0129718	0.169379	0.0582035	-0.20989	0.00172831	0.379269	Buffering	Buffering	Buffering	Buffering
793	BCAM	BCAM	0.00214668	1.09687	0.896916	0.0330131	0.00608249	1.06386	sp.P50895.BCAM_HUMAN	0.000809548	0.91248	0.607329	0.105486	0.00930225	0.806993	Scaling	Buffering	Scaling	Anti-Scaling
794	BCAP29	BCAP29	0.000144095	0.410075	0.0248287	-0.276743	3.30906e-06	0.686818	sp.Q9UHQ4.2.BAP29_HUMAN	0.000753755	0.37206	0.487907	-0.0775728	0.00088103	0.449633	Scaling	Scaling	Scaling	Buffering
795	BCAR1	BCAR1	0.000129196	0.900113	0.286587	-0.178498	2.09838e-05	1.07861	sp.P56945.6.BCAR1_HUMAN	0.000160924	0.598781	0.395661	-0.0860041	4.95797e-05	0.684785	Scaling	Buffering	Scaling	Buffering
796	BCAR3	BCAR3	0.180639	0.434335	0.487531	0.131415	0.370822	0.30292	sp.O75815.BCAR3_HUMAN	0.501729	0.145604	0.218473	-0.144961	0.207234	0.290565	Scaling	Anti-Scaling	Buffering	Buffering
797	BCAS1	BCAS1	0.0927738	0.286159	0.387141	0.422897	0.782152	-0.136738	sp.O75363.2.BCAS1_HUMAN	0.816875	0.049929	0.38093	0.449848	0.436817	-0.399919	Scaling	Anti-Scaling	Buffering	Anti-Scaling
798	BCAS1	BCAS1	0.0927738	0.286159	0.387141	0.422897	0.782152	-0.136738	sp.O75363.BCAS1_HUMAN	0.524149	0.275452	0.317867	0.837559	0.492522	-0.562107	Scaling	Anti-Scaling	Scaling	Anti-Scaling
799	BCAS2	BCAS2	0.000412478	0.342742	0.15762	-0.136801	0.000150923	0.479544	sp.O75934.SPF27_HUMAN	0.00796037	0.262149	0.0967716	0.107751	0.143626	0.154398	Scaling	Buffering	Scaling	Anti-Scaling
800	BCAS3	BCAS3	0.0322578	0.368522	0.0253142	-0.340319	0.00070275	0.708841	sp.Q9H6U6.8.BCAS3_HUMAN	0.000679476	0.341081	0.000837454	-0.382985	4.90382e-07	0.724066	Scaling	Scaling	Scaling	Scaling
801	BCAT1	BCAT1	0.455835	0.231751	0.719827	-0.112471	0.368397	0.344222	sp.P54687.5.BCAT1_HUMAN	0.160754	0.315967	0.88357	-0.0290136	0.191851	0.34498	Buffering	Buffering	Scaling	Buffering
802	BCAT2	BCAT2	0.0034356	0.368713	1.52569e-05	-0.39499	1.03184e-07	0.763704	sp.O15382.BCAT2_HUMAN	0.000817996	0.387185	0.0893888	-0.142588	3.4004e-05	0.529773	Scaling	Scaling	Scaling	Buffering
803	BCCIP	BCCIP	0.399286	0.127118	1.85578e-06	-0.334145	0.00584768	0.461263	sp.Q9P287.2.BCCIP_HUMAN	0.804058	0.0359518	4.40611e-05	-0.253243	0.0619037	0.289195	Buffering	Scaling	Buffering	Scaling
804	BCCIP	BCCIP	0.399286	0.127118	1.85578e-06	-0.334145	0.00584768	0.461263	sp.Q9P287.BCCIP_HUMAN	0.534288	-0.103549	0.00021726	-0.257315	0.371931	0.153766	Buffering	Scaling	Anti-Scaling	Scaling
805	BCDIN3D	BCDIN3D	0.109736	0.188853	0.00320039	-0.197383	0.00321134	0.386236	sp.Q7Z5W3.BN3D2_HUMAN	0.765379	0.109947	0.226923	-0.477107	0.242222	0.587053	Buffering	Buffering	Buffering	Scaling
806	BCHE	BCHE	0.584013	0.148996	0.253343	-0.379543	0.174404	0.528538	sp.P06276.CHLE_HUMAN	0.563707	0.145941	0.449125	-0.206328	0.283747	0.352269	Buffering	Scaling	Buffering	Buffering
807	BCKDHA	BCKDHA	0.00709403	0.324706	0.000133665	-0.333237	1.11864e-06	0.657943	sp.P12694.ODBA_HUMAN	0.00583956	0.238339	0.0780607	-0.1286	0.000162354	0.366939	Scaling	Scaling	Buffering	Buffering
808	BCKDHB	BCKDHB	0.0331616	0.403035	0.000145198	-0.300537	0.000681781	0.703572	sp.P21953.ODBB_HUMAN	0.329168	0.159175	0.0849252	-0.123545	0.094669	0.28272	Scaling	Scaling	Buffering	Buffering
809	BCKDK	BCKDK	0.00872225	0.250457	0.00789843	-0.176564	8.31669e-05	0.427021	sp.O14874.BCKD_HUMAN	0.231702	0.130115	0.813626	-0.0181829	0.205642	0.148298	Scaling	Buffering	Buffering	Buffering
810	BCL10	BCL10	0.00223158	0.442483	0.0113212	-0.221676	4.02946e-05	0.664159	sp.O95999.BCL10_HUMAN	0.471593	0.122472	0.000995361	-0.321099	0.0176528	0.443571	Scaling	Buffering	Buffering	Scaling
811	BCL11A	BCL11A	0.392208	0.208826	0.0221788	-0.428355	0.0204355	0.637181	sp.Q9H165.BC11A_HUMAN	0.796859	0.0882607	0.0408998	-0.597488	0.0893333	0.685749	Buffering	Scaling	Buffering	Scaling
812	BCL11B	BCL11B	0.0544285	0.217265	0.239265	-0.0870948	0.00849294	0.30436	sp.Q9C0K0.BC11B_HUMAN	0.0245675	0.880374	0.184214	-0.307876	0.002682	1.18825	Buffering	Buffering	Scaling	Scaling
813	BCL2	BCL2	0.0373317	0.921396	9.48115e-15	-1.17442	4.8244e-05	2.09581	sp.P10415.BCL2_HUMAN	0.0145235	1.51599	0.00365502	-0.542615	0.00208952	2.0586	Scaling	Scaling	Scaling	Scaling
814	BCL2L1	BCL2L1	7.81237e-07	0.540482	0.0324945	0.458649	0.693183	0.0818323	sp.Q07817.B2CL1_HUMAN	0.000521513	0.314544	0.0927676	0.310935	0.98405	0.00360915	Scaling	Anti-Scaling	Scaling	Anti-Scaling
815	BCL2L11	BCL2L11	0.447696	-0.107521	0.25784	-0.132826	0.879577	0.0253055	sp.O43521.12.B2L11_HUMAN	0.196903	-0.259755	0.451227	-0.188873	0.806018	-0.070882	Anti-Scaling	Buffering	Anti-Scaling	Buffering
816	BCL2L12	BCL2L12	0.0191216	0.237191	0.00470249	-0.214432	2.2681e-05	0.451623	sp.Q9HB09.B2L12_HUMAN	0.121846	0.226731	0.885418	-0.016008	0.126883	0.242739	Buffering	Buffering	Buffering	Buffering
817	BCL2L13	BCL2L13	0.0271174	0.457835	5.38041e-05	-0.316576	0.000629448	0.774412	sp.Q9BXK5.B2L13_HUMAN	0.0238662	0.483162	0.0879192	-0.141904	0.00498096	0.625066	Scaling	Scaling	Scaling	Buffering
818	BCL2L14	BCL2L14	0.757423	-0.0419583	0.421862	-0.110033	0.679097	0.0680744	sp.Q9BZR8.B2L14_HUMAN	0.110192	-0.711543	0.85757	-0.0914364	0.21701	-0.620107	Buffering	Buffering	Anti-Scaling	Buffering
819	BCL2L15	BCL2L15	0.701434	-0.103706	0.195799	0.261666	0.252901	-0.365372	sp.Q5TBC7.B2L15_HUMAN	0.357956	0.699024	0.211642	0.49016	0.788412	0.208864	Anti-Scaling	Anti-Scaling	Scaling	Anti-Scaling
820	BCL2L2	BCL2L2	0.00135515	0.324234	0.0158031	-0.210759	2.76672e-06	0.534993	sp.Q92843.2.B2CL2_HUMAN	0.280234	0.0827966	0.000112748	-0.264375	0.000197798	0.347171	Scaling	Buffering	Buffering	Scaling
821	BCL3	BCL3	0.0164902	0.391061	0.258049	0.171616	0.248145	0.219445	sp.P20749.BCL3_HUMAN	0.233996	0.211004	0.185706	0.185525	0.900722	0.0254787	Scaling	Anti-Scaling	Buffering	Anti-Scaling
822	BCL6	BCL6	0.343925	-0.157564	0.120635	-0.267718	0.582243	0.110154	sp.P41182.BCL6_HUMAN	0.00905482	-0.563756	0.00255144	-0.898421	0.237663	0.334665	Anti-Scaling	Scaling	Anti-Scaling	Scaling
823	BCL7A	BCL7A	0.14063	0.279333	0.000239045	-0.461809	0.000494962	0.741142	sp.Q4VC05.BCL7A_HUMAN	0.100712	0.498583	0.774062	-0.0620466	0.0992587	0.56063	Scaling	Scaling	Scaling	Buffering
824	BCL7A	BCL7A	0.14063	0.279333	0.000239045	-0.461809	0.000494962	0.741142	sp.Q4VC05.2.BCL7A_HUMAN	0.0479539	0.294838	0.478383	-0.0800146	0.0235696	0.374852	Scaling	Scaling	Scaling	Buffering
825	BCL7B	BCL7B	1.61282e-07	0.342273	0.0061023	-0.241506	6.27837e-09	0.583779	sp.Q9BQE9.BCL7B_HUMAN	0.228315	0.1192	0.680445	-0.0507163	0.211125	0.169917	Scaling	Buffering	Buffering	Buffering
826	BCL7C	BCL7C	0.029885	0.259622	0.0846133	-0.127669	0.002974	0.38729	sp.Q8WUZ0.BCL7C_HUMAN	0.0241419	0.316761	0.740573	-0.024868	0.0200699	0.341629	Scaling	Buffering	Scaling	Buffering
827	BCL9	BCL9	0.00637418	0.306004	0.00217547	-0.506478	1.26678e-05	0.812482	sp.O00512.BCL9_HUMAN	0.0344561	0.214445	0.00565042	-0.498022	0.000268953	0.712467	Scaling	Scaling	Buffering	Scaling
828	BCL9L	BCL9L	0.00177047	0.612007	0.229664	-0.172191	0.000189248	0.784199	sp.Q86UU0.BCL9L_HUMAN	0.0196963	0.299671	0.292928	-0.108599	0.00354187	0.40827	Scaling	Buffering	Scaling	Buffering
829	BCLAF1	BCLAF1	0.224929	0.159409	1.39887e-07	-0.314396	0.00114675	0.473805	sp.Q9NYF8.BCLF1_HUMAN	0.351982	0.0620043	0.0507037	-0.104565	0.0207404	0.166569	Buffering	Scaling	Buffering	Buffering
830	BCR	BCR	0.839881	0.0558809	0.00225625	-0.317302	0.192556	0.373183	sp.P11274.BCR_HUMAN	0.711614	-0.0771594	0.00709568	-0.178877	0.629745	0.101718	Buffering	Scaling	Buffering	Buffering
831	BCS1L	BCS1L	0.0363422	0.17248	7.45218e-06	-0.33025	1.85095e-06	0.50273	sp.Q9Y276.BCS1_HUMAN	0.00325367	0.274512	0.000110406	-0.283576	3.5133e-07	0.558087	Buffering	Scaling	Scaling	Scaling
832	BDH1	BDH1	0.0410397	0.417366	0.063377	-0.580876	0.0040081	0.998242	sp.Q02338.BDH_HUMAN	0.00307741	0.464774	0.0659281	-0.368249	0.000453343	0.833022	Scaling	Scaling	Scaling	Scaling
833	BDH2	BDH2	0.085	0.465058	1.95953e-05	-0.484098	0.00209149	0.949156	sp.Q9BUT1.BDH2_HUMAN	0.330216	0.428574	0.0126844	-0.30962	0.10543	0.738194	Scaling	Scaling	Scaling	Scaling
834	BDP1	BDP1	0.331063	0.0932868	4.25902e-06	-0.340436	6.85266e-05	0.433722	sp.A6H8Y1.BDP1_HUMAN	0.605077	-0.0553719	0.0236355	-0.160826	0.350461	0.105454	Buffering	Scaling	Buffering	Buffering
835	BECN1	BECN1	0.00239043	0.208284	1.38567e-05	-0.357861	1.43555e-08	0.566145	sp.Q14457.BECN1_HUMAN	0.878108	0.00825708	0.00443601	-0.185219	0.0093986	0.193476	Buffering	Scaling	Buffering	Buffering
836	BEND3	BEND3	0.905469	0.0140996	1.62515e-06	-0.310171	0.00998936	0.32427	sp.Q5T5X7.BEND3_HUMAN	0.508078	0.0867448	0.00103937	-0.193921	0.0411752	0.280665	Buffering	Scaling	Buffering	Buffering
837	BEND5	BEND5	0.135117	0.327775	0.0367207	-0.197641	0.020846	0.525416	sp.Q7L4P6.BEND5_HUMAN	0.985098	0.00684049	0.0686246	-0.45881	0.240327	0.465651	Scaling	Buffering	Buffering	Scaling
838	BET1	BET1	3.16557e-14	0.565165	0.0930826	-0.144889	1.02717e-11	0.710054	sp.O15155.BET1_HUMAN	0.000169758	0.328486	0.621839	-0.0655442	0.00487445	0.39403	Scaling	Buffering	Scaling	Buffering
839	BET1L	BET1L	0.156156	0.21926	1.05581e-10	-0.412031	0.000200168	0.631291	sp.Q9NYM9.BET1L_HUMAN	0.257493	0.168695	0.00422237	-0.256022	0.00779291	0.424717	Buffering	Scaling	Buffering	Scaling
840	BHLHE40	BHLHE40	0.979617	0.0097857	0.897111	0.0215372	0.975532	-0.0117515	sp.O14503.BHE40_HUMAN	0.875622	-0.0397995	0.571269	0.069958	0.665072	-0.109758	Buffering	Buffering	Buffering	Buffering
841	BHLHE41	BHLHE41	0.408884	0.198849	0.201268	0.3048	0.721826	-0.105951	sp.Q9C0J9.BHE41_HUMAN	0.96087	-0.0100695	0.00652548	0.486628	0.0334965	-0.496698	Buffering	Anti-Scaling	Buffering	Anti-Scaling
842	BHMT	BHMT	0.392698	0.0695568	0.441069	-0.0329658	0.219308	0.102523	sp.Q93088.BHMT1_HUMAN	0.632492	0.090911	0.0146918	0.521446	0.0930142	-0.430535	Buffering	Buffering	Buffering	Anti-Scaling
843	BICC1	BICC1	0.970613	0.0198637	0.0742771	-0.330198	0.521593	0.350062	sp.Q9H694.BICC1_HUMAN	0.297318	0.805299	0.00162925	-0.614558	0.0801089	1.41986	Buffering	Scaling	Scaling	Scaling
844	BICD1	BICD1	0.00115046	0.368417	0.0755382	-0.234435	8.69805e-05	0.602851	sp.Q96G01.BICD1_HUMAN	0.291562	0.0910648	0.973015	-0.00257778	0.340715	0.0936426	Scaling	Buffering	Buffering	Buffering
845	BICD2	BICD2	4.34707e-06	0.481598	4.16638e-06	-0.375049	5.22101e-12	0.856647	sp.Q8TD16.2.BICD2_HUMAN	0.000819815	0.369621	0.0154076	-0.192693	4.65546e-06	0.562314	Scaling	Scaling	Scaling	Buffering
846	BID	BID	0.622353	-0.0962359	0.207375	-0.135358	0.846111	0.0391223	sp.P55957.2.BID_HUMAN	0.859188	-0.0392792	0.00284375	-0.299838	0.25716	0.260559	Buffering	Buffering	Buffering	Scaling
847	BIN1	BIN1	0.387273	0.291279	0.173485	-0.296962	0.119219	0.588241	sp.O00499.BIN1_HUMAN	0.904276	0.0351752	0.0106511	-0.453086	0.133145	0.488261	Scaling	Scaling	Buffering	Scaling
848	BIN1	BIN1	0.387273	0.291279	0.173485	-0.296962	0.119219	0.588241	sp.O00499.8.BIN1_HUMAN	0.849284	-0.0615924	0.0163022	-0.500396	0.223692	0.438803	Scaling	Scaling	Buffering	Scaling
849	BIN2	BIN2	8.95643e-07	-0.478069	0.0666201	-0.293286	0.163599	-0.184783	sp.Q9UBW5.BIN2_HUMAN	0.00273379	-0.587401	0.173253	-0.363416	0.390824	-0.223985	Anti-Scaling	Scaling	Anti-Scaling	Scaling
850	BIN3	BIN3	0.0104568	0.394056	1.13019e-11	-0.662321	1.89328e-09	1.05638	sp.Q9NQY0.BIN3_HUMAN	0.57979	0.0915731	0.651867	-0.0332593	0.445255	0.124832	Scaling	Scaling	Buffering	Buffering
851	BIRC2	BIRC2	0.00236392	0.359454	0.264785	-0.135554	0.00103545	0.495008	sp.Q13490.BIRC2_HUMAN	0.137976	0.130311	0.289004	-0.089995	0.0459594	0.220306	Scaling	Buffering	Buffering	Buffering
852	BIRC5	BIRC5	0.000173213	0.373263	0.0475375	-0.24938	4.07297e-05	0.622643	sp.O15392.BIRC5_HUMAN	0.88215	-0.0267154	0.30074	0.171235	0.382763	-0.197951	Scaling	Buffering	Buffering	Anti-Scaling
853	BIRC6	BIRC6	0.00018072	0.252526	0.0444565	-0.160071	2.60344e-05	0.412597	sp.Q9NR09.BIRC6_HUMAN	0.21584	0.0833519	0.0277214	-0.170856	0.00687833	0.254208	Scaling	Buffering	Buffering	Buffering
854	BLM	BLM	0.269177	0.159407	2.47616e-07	-0.401867	0.000574192	0.561274	sp.P54132.BLM_HUMAN	0.834806	0.0322126	0.00102077	-0.220853	0.118541	0.253065	Buffering	Scaling	Buffering	Buffering
855	BLMH	BLMH	0.983121	-0.00401083	0.00926521	-0.549084	0.04143	0.545073	sp.Q13867.BLMH_HUMAN	0.992785	0.00107948	0.00131865	-0.436727	0.0078919	0.437807	Buffering	Scaling	Buffering	Scaling
856	BLNK	BLNK	0.999973	-1.38609e-05	0.180327	-0.228024	0.587228	0.22801	sp.Q8WV28.BLNK_HUMAN	0.764571	-0.166636	0.654563	-0.126258	0.943362	-0.0403777	Buffering	Buffering	Anti-Scaling	Buffering
857	BLOC1S1	BLOC1S1	0.00301642	0.328324	0.0426247	-0.189915	0.000119031	0.518239	sp.P78537.BL1S1_HUMAN	0.0209321	0.180888	0.394908	-0.0616609	0.0114924	0.242549	Scaling	Buffering	Buffering	Buffering
858	BLOC1S2	BLOC1S2	0.0763993	0.233439	7.63784e-15	-0.485929	7.75313e-06	0.719369	sp.Q6QNY1.BL1S2_HUMAN	0.606727	0.081408	0.00155022	-0.181879	0.110136	0.263287	Buffering	Scaling	Buffering	Buffering
859	BLOC1S3	BLOC1S3	0.000550288	0.262053	0.000236915	-0.230268	2.38593e-08	0.492321	sp.Q6QNY0.BL1S3_HUMAN	0.0904272	-0.157752	0.0650577	-0.148349	0.9284	-0.0094026	Scaling	Buffering	Anti-Scaling	Buffering
860	BLOC1S4	BLOC1S4	0.0114928	0.413786	2.02946e-11	-0.378031	4.04587e-05	0.791817	sp.Q9NUP1.BL1S4_HUMAN	0.551539	-0.125012	0.000404646	-0.242539	0.576072	0.117527	Scaling	Scaling	Anti-Scaling	Buffering
861	BLOC1S5	BLOC1S5	0.0158612	0.239492	1.51063e-08	-0.433638	2.67937e-08	0.67313	sp.Q8TDH9.BL1S5_HUMAN	0.582684	0.0680953	0.000356266	-0.358482	0.00316326	0.426578	Buffering	Scaling	Buffering	Scaling
862	BLOC1S6	BLOC1S6	0.442085	0.0964575	1.54569e-15	-0.535026	3.36153e-05	0.631484	sp.Q9UL45.BL1S6_HUMAN	0.810969	0.0264928	0.318158	-0.12251	0.284911	0.149003	Buffering	Scaling	Buffering	Buffering
863	BLVRA	BLVRA	4.79683e-06	0.680418	0.49761	0.135009	0.00523289	0.545409	sp.P53004.BIEA_HUMAN	0.000375553	0.359831	0.50385	-0.0975598	0.00207609	0.45739	Scaling	Anti-Scaling	Scaling	Buffering
864	BLVRB	BLVRB	0.0330724	0.464933	0.496381	0.0982305	0.112119	0.366703	sp.P30043.BLVRB_HUMAN	0.327087	0.155619	0.493938	-0.07593	0.174042	0.231549	Scaling	Buffering	Buffering	Buffering
865	BLZF1	BLZF1	0.00478867	0.227507	0.169239	-0.134446	0.00139072	0.361953	sp.Q9H2G9.GO45_HUMAN	0.666737	-0.0293302	0.94398	0.00530551	0.685317	-0.0346357	Buffering	Buffering	Buffering	Buffering
866	BMP1	BMP1	0.779262	-0.0609977	0.00309354	-0.378037	0.140661	0.31704	sp.P13497.BMP1_HUMAN	0.695941	0.133591	0.975635	0.0048056	0.697985	0.128785	Buffering	Scaling	Buffering	Buffering
867	BMP2K	BMP2K	0.081132	0.269943	7.69208e-06	-0.415545	0.000191029	0.685489	sp.Q9NSY1.BMP2K_HUMAN	0.992198	0.00128407	0.0129755	-0.179624	0.185887	0.180908	Scaling	Scaling	Buffering	Buffering
868	BMP4	BMP4	0.0381789	0.812988	0.86835	-0.0493522	0.0474444	0.86234	sp.P12644.BMP4_HUMAN	0.0944838	1.33063	0.233704	0.578288	0.322433	0.752341	Scaling	Buffering	Scaling	Anti-Scaling
869	BMPR1A	BMPR1A	0.108093	0.409959	2.54208e-05	-0.428625	0.00243026	0.838584	sp.P36894.BMR1A_HUMAN	0.320327	0.352221	0.147157	-0.205223	0.137067	0.557443	Scaling	Scaling	Scaling	Buffering
870	BMPR2	BMPR2	0.000962006	0.524256	0.642255	0.0421789	0.00318447	0.482077	sp.Q13873.BMPR2_HUMAN	0.00286593	0.494624	0.814778	0.0240437	0.00761391	0.470581	Scaling	Buffering	Scaling	Buffering
871	BMS1	BMS1	0.012103	0.293838	6.27205e-06	-0.280053	2.04992e-05	0.573891	sp.Q14692.BMS1_HUMAN	0.944705	-0.00927521	0.270764	-0.0628535	0.696191	0.0535783	Scaling	Scaling	Buffering	Buffering
872	BNC2	BNC2	0.204195	0.379421	0.341569	0.14373	0.426524	0.235691	sp.Q6ZN30.BNC2_HUMAN	0.136309	0.448369	0.35251	0.294432	0.597242	0.153937	Scaling	Anti-Scaling	Scaling	Anti-Scaling
873	BNIP1	BNIP1	0.000324543	0.272083	0.00025426	-0.244869	3.482e-08	0.516951	sp.Q12981.SEC20_HUMAN	0.574806	0.0394611	0.197371	-0.0720707	0.178774	0.111532	Scaling	Buffering	Buffering	Buffering
874	BNIP2	BNIP2	0.000839254	0.39469	7.17452e-07	-0.322079	2.86741e-07	0.716769	tr.J3KN59.J3KN59_HUMAN	0.0980668	0.414808	0.0449105	-0.214267	0.0187641	0.629074	Scaling	Scaling	Scaling	Buffering
875	BNIP3	BNIP3	0.585727	-0.210862	0.235347	-0.237386	0.946904	0.0265234	sp.Q12983.BNIP3_HUMAN	0.636446	-0.232207	0.227638	-0.225246	0.988894	-0.00696132	Anti-Scaling	Buffering	Anti-Scaling	Buffering
876	BNIP3L	BNIP3L	0.0856813	0.313718	3.19029e-05	-0.453059	8.4423e-05	0.766777	sp.O60238.BNI3L_HUMAN	0.960154	0.00990352	1.3143e-05	-0.37383	0.0577735	0.383733	Scaling	Scaling	Buffering	Scaling
877	BOD1	BOD1	1.78362e-06	0.553787	0.0263335	-0.191158	2.31741e-08	0.744945	sp.Q96IK1.BOD1_HUMAN	0.0106739	0.290879	0.287845	-0.0747816	0.00261945	0.36566	Scaling	Buffering	Scaling	Buffering
878	BOD1L1	BOD1L1	0.0712355	0.248571	6.02278e-17	-0.497008	1.60592e-05	0.74558	sp.Q8NFC6.BD1L1_HUMAN	0.0533732	0.324975	0.248032	-0.0633117	0.0245053	0.388287	Buffering	Scaling	Scaling	Buffering
879	BOK	BOK	0.0112187	0.610208	0.0085742	0.464211	0.571643	0.145996	sp.Q9UMX3.BOK_HUMAN	0.187281	-0.262151	0.561605	0.12226	0.131174	-0.384412	Scaling	Anti-Scaling	Anti-Scaling	Anti-Scaling
880	BOLA1	BOLA1	0.021217	0.320099	0.0760389	-0.285616	0.00132845	0.605715	sp.Q9Y3E2.BOLA1_HUMAN	0.0433296	0.213571	0.276137	-0.126826	0.0105592	0.340397	Scaling	Scaling	Buffering	Buffering
881	BOLA2	BOLA2	0.171588	0.145489	0.218612	-0.100506	0.0445918	0.245995	sp.Q9H3K6.BOLA2_HUMAN	0.000919839	0.557008	0.15073	-0.155778	7.60721e-05	0.712786	Buffering	Buffering	Scaling	Buffering
882	BOLA3	BOLA3	0.0390728	0.202991	0.0163184	-0.245195	0.000721805	0.448185	sp.Q53S33.BOLA3_HUMAN	0.00732712	0.291857	0.610927	-0.0433368	0.0080144	0.335194	Buffering	Buffering	Scaling	Buffering
883	BOP1	BOP1	6.01834e-06	0.331408	0.287134	-0.127452	0.000455586	0.45886	sp.Q14137.BOP1_HUMAN	0.500523	0.0383357	0.446892	0.0727499	0.729993	-0.0344143	Scaling	Buffering	Buffering	Buffering
884	BORA	BORA	2.6553e-06	0.623006	4.99271e-09	-0.427521	7.82263e-12	1.05053	sp.Q6PGQ7.BORA_HUMAN	0.408924	0.34119	0.39961	-0.222568	0.213399	0.563758	Scaling	Scaling	Scaling	Buffering
885	BPGM	BPGM	3.10785e-09	0.537833	0.684378	-0.0568005	0.000105258	0.594634	sp.P07738.PMGE_HUMAN	2.45623e-07	0.492782	0.976622	-0.00500045	0.00687033	0.497782	Scaling	Buffering	Scaling	Buffering
886	BPHL	BPHL	0.036804	0.313958	0.07027	-0.181367	0.00356297	0.495326	sp.Q86WA6.BPHL_HUMAN	0.0360471	0.275027	0.107196	-0.184068	0.00395393	0.459095	Scaling	Buffering	Scaling	Buffering
887	BPNT1	BPNT1	7.65308e-05	0.315513	0.000363345	-0.459106	1.41586e-07	0.774619	tr.B4DPS5.B4DPS5_HUMAN	0.00107756	0.338374	0.00920025	-0.370063	1.59333e-05	0.708437	Scaling	Scaling	Scaling	Scaling
888	BPNT1	BPNT1	7.65308e-05	0.315513	0.000363345	-0.459106	1.41586e-07	0.774619	tr.A6NF51.A6NF51_HUMAN	0.000310262	0.35548	0.00812344	-0.348466	4.858e-06	0.703946	Scaling	Scaling	Scaling	Scaling
889	BPTF	BPTF	0.00156587	0.253005	0.000502315	-0.343185	2.62415e-07	0.59619	tr.E9PE19.E9PE19_HUMAN	0.0122787	0.406128	0.133049	0.299751	0.626155	0.106377	Scaling	Scaling	Scaling	Anti-Scaling
890	BPTF	BPTF	0.00156587	0.253005	0.000502315	-0.343185	2.62415e-07	0.59619	sp.Q12830.BPTF_HUMAN	0.0853112	0.110227	0.188486	-0.105905	0.0242093	0.216132	Scaling	Scaling	Buffering	Buffering
891	BRAF	BRAF	0.000130308	0.22724	0.119802	-0.128537	8.77094e-05	0.355777	sp.P15056.BRAF_HUMAN	0.0280882	0.146326	0.00712874	-0.252363	4.04776e-05	0.398689	Buffering	Buffering	Buffering	Scaling
892	BRAP	BRAP	0.568685	0.0535696	4.21007e-05	-0.237578	0.00707415	0.291148	sp.Q7Z569.BRAP_HUMAN	0.0461965	0.191744	0.00175138	-0.255544	0.000183327	0.447288	Buffering	Buffering	Buffering	Scaling
893	BRAT1	BRAT1	2.5422e-06	0.288232	3.5447e-08	-0.571962	9.04635e-14	0.860194	sp.Q6PJG6.BRAT1_HUMAN	0.00123855	0.193553	0.052995	-0.163248	6.73253e-05	0.356801	Scaling	Scaling	Buffering	Buffering
894	BRCA1	BRCA1	0.17458	0.143378	0.000445435	-0.408655	0.000150315	0.552033	sp.P38398.BRCA1_HUMAN	0.17465	0.155425	0.623676	-0.0560605	0.158681	0.211486	Buffering	Scaling	Buffering	Buffering
895	BRCA2	BRCA2	0.0109925	0.326537	4.32433e-05	-0.310722	5.64323e-06	0.637259	sp.P51587.BRCA2_HUMAN	0.920669	-0.0161835	0.106087	-0.137902	0.458737	0.121718	Scaling	Scaling	Buffering	Buffering
896	BRD1	BRD1	0.00230927	0.410367	1.07287e-09	-0.376549	7.3402e-07	0.786916	sp.O95696.2.BRD1_HUMAN	0.0490676	0.238621	0.00527967	-0.152312	0.00273524	0.390932	Scaling	Scaling	Buffering	Buffering
897	BRD2	BRD2	0.0517871	0.184014	3.54415e-06	-0.353994	3.62829e-06	0.538008	sp.P25440.2.BRD2_HUMAN	0.445355	0.0523304	0.0778582	-0.113176	0.0525605	0.165506	Buffering	Scaling	Buffering	Buffering
898	BRD3	BRD3	0.000635488	0.396037	3.79692e-05	-0.367684	1.95054e-08	0.763721	sp.Q15059.BRD3_HUMAN	2.54281e-05	0.42306	0.516057	-0.0520057	1.68101e-05	0.475066	Scaling	Scaling	Scaling	Buffering
899	BRD4	BRD4	0.00273923	0.397842	0.00233996	-0.215215	3.38557e-05	0.613056	sp.O60885.BRD4_HUMAN	0.0633277	0.264607	0.306045	-0.0604339	0.0267546	0.325041	Scaling	Buffering	Scaling	Buffering
900	BRD7	BRD7	3.89104e-06	0.477155	5.25527e-08	-0.385633	6.67287e-13	0.862788	sp.Q9NPI1.2.BRD7_HUMAN	0.43682	-0.0896426	0.759899	-0.0244029	0.595781	-0.0652397	Scaling	Scaling	Buffering	Buffering
901	BRD8	BRD8	0.0306285	0.229521	2.10316e-06	-0.379271	1.62398e-06	0.608792	sp.Q9H0E9.2.BRD8_HUMAN	0.797915	-0.0224509	0.597755	0.0342746	0.569153	-0.0567254	Buffering	Scaling	Buffering	Buffering
902	BRD9	BRD9	1.20415e-11	0.480079	0.000951825	-0.407723	2.33691e-09	0.887802	sp.Q9H8M2.BRD9_HUMAN	0.96262	-0.00400671	0.409024	0.150579	0.40369	-0.154586	Scaling	Scaling	Buffering	Anti-Scaling
903	BRF1	BRF1	0.0147097	0.274564	1.63934e-09	-0.495685	6.97885e-09	0.770248	sp.Q92994.TF3B_HUMAN	0.809928	0.0209465	2.57071e-09	-0.395645	1.25622e-05	0.416592	Scaling	Scaling	Buffering	Scaling
904	BRI3	BRI3	5.71085e-07	0.542073	0.110597	-0.249111	5.00008e-06	0.791184	sp.O95415.BRI3_HUMAN	0.00954598	0.326101	0.692214	0.0619334	0.122248	0.264167	Scaling	Buffering	Scaling	Buffering
905	BRI3BP	BRI3BP	0.703039	0.0676331	0.0248086	-0.281364	0.0906536	0.348997	sp.Q8WY22.BRI3B_HUMAN	0.594823	0.0639055	0.00961005	-0.258952	0.0267988	0.322857	Buffering	Scaling	Buffering	Scaling
906	BRIP1	BRIP1	0.0162297	0.241311	0.00013204	-0.420932	1.22822e-06	0.662243	sp.Q9BX63.FANCJ_HUMAN	0.0409126	0.208822	0.479471	-0.0969097	0.0524516	0.305732	Buffering	Scaling	Buffering	Buffering
907	BRIX1	BRIX1	1.3415e-15	0.543677	0.00293031	-0.456079	4.17015e-08	0.999756	sp.Q8TDN6.BRX1_HUMAN	3.53799e-05	0.269207	0.453263	-0.0722335	0.00125655	0.34144	Scaling	Scaling	Scaling	Buffering
908	BRK1	BRK1	0.00419125	0.310788	1.79706e-13	-0.47131	5.26543e-08	0.782098	sp.Q8WUW1.2.BRK1_HUMAN	0.237542	0.111836	0.0611124	-0.0934052	0.040303	0.205241	Scaling	Scaling	Buffering	Buffering
909	BRMS1	BRMS1	5.68961e-05	0.305493	0.0131797	0.226055	0.44797	0.0794371	sp.Q9HCU9.BRMS1_HUMAN	0.252385	0.111996	0.380951	0.0682325	0.691986	0.0437636	Scaling	Anti-Scaling	Buffering	Buffering
910	BRMS1L	BRMS1L	0.000131304	0.463791	4.13735e-05	-0.400607	2.53655e-09	0.864398	sp.Q5PSV4.BRM1L_HUMAN	0.00114035	0.307529	7.32615e-05	-0.324309	1.71321e-08	0.631839	Scaling	Scaling	Scaling	Scaling
911	BROX	BROX	0.000404855	0.252151	0.0625654	-0.188588	0.000150458	0.440739	sp.Q5VW32.BROX_HUMAN	2.47351e-05	0.385711	0.0742458	-0.17422	7.93954e-06	0.559932	Scaling	Buffering	Scaling	Buffering
912	BRPF1	BRPF1	0.0414153	0.289746	3.62586e-15	-0.529595	7.10335e-06	0.819342	sp.P55201.2.BRPF1_HUMAN	0.189729	0.132925	0.0393126	-0.107608	0.0275036	0.240532	Scaling	Scaling	Buffering	Buffering
913	BRPF3	BRPF3	0.000185879	0.457416	0.00135909	-0.260427	2.14298e-07	0.717844	sp.Q9ULD4.BRPF3_HUMAN	0.00805943	0.301615	0.0735679	-0.135222	0.000493954	0.436838	Scaling	Scaling	Scaling	Buffering
914	BRSK1	BRSK1	0.763622	-0.0581095	0.00600106	-0.41176	0.0902029	0.353651	sp.Q8TDC3.2.BRSK1_HUMAN	0.922482	-0.0476482	0.108034	0.541942	0.25904	-0.58959	Buffering	Scaling	Buffering	Anti-Scaling
915	BRSK2	BRSK2	0.153996	0.368519	0.878658	-0.0217572	0.143045	0.390277	sp.Q8IWQ3.4.BRSK2_HUMAN	0.552104	-0.207284	0.864398	-0.063912	0.757687	-0.143372	Scaling	Buffering	Anti-Scaling	Buffering
916	BRWD1	BRWD1	0.0192329	0.406634	2.04114e-07	-0.379987	3.64454e-05	0.786621	sp.Q9NSI6.2.BRWD1_HUMAN	0.635376	-0.049139	0.814484	0.0159537	0.553692	-0.0650927	Scaling	Scaling	Buffering	Buffering
917	BSCL2	BSCL2	0.421192	-0.128158	0.534538	-0.076829	0.770774	-0.0513295	sp.Q96G97.4.BSCL2_HUMAN	0.490525	-0.170906	0.374514	0.140235	0.245056	-0.311141	Anti-Scaling	Buffering	Anti-Scaling	Anti-Scaling
918	BSDC1	BSDC1	1.60576e-08	0.483775	0.00450103	-0.226241	3.48925e-11	0.710017	sp.Q9NW68.3.BSDC1_HUMAN	0.151723	0.125986	0.763329	-0.0197813	0.126062	0.145767	Scaling	Buffering	Buffering	Buffering
919	BSDC1	BSDC1	1.60576e-08	0.483775	0.00450103	-0.226241	3.48925e-11	0.710017	sp.Q9NW68.BSDC1_HUMAN	0.144223	0.189466	0.692161	0.0394881	0.291609	0.149978	Scaling	Buffering	Buffering	Buffering
920	BSG	BSG	0.968476	-0.00714496	0.00129574	-0.230311	0.229841	0.223167	sp.P35613.BASI_HUMAN	0.555338	0.0991271	0.0719386	0.14223	0.800219	-0.0431031	Buffering	Buffering	Buffering	Anti-Scaling
921	BSPRY	BSPRY	0.573281	-0.165844	0.914196	0.0241078	0.55748	-0.189952	sp.Q5W0U4.BSPRY_HUMAN	0.696792	-0.100793	0.759141	0.0586442	0.560355	-0.159437	Anti-Scaling	Buffering	Anti-Scaling	Buffering
922	BST1	BST1	0.494482	0.213712	0.19832	-0.195658	0.194371	0.40937	sp.Q10588.BST1_HUMAN	0.194219	1.1168	0.634509	0.117991	0.240491	0.998807	Buffering	Buffering	Scaling	Anti-Scaling
923	BST2	BST2	0.731114	0.245548	0.842462	0.0622793	0.800034	0.183269	sp.Q10589.BST2_HUMAN	0.59452	-0.176884	0.888759	-0.0239778	0.654604	-0.152907	Buffering	Buffering	Anti-Scaling	Buffering
924	BTAF1	BTAF1	0.043815	0.351849	1.67679e-09	-0.45004	7.52625e-05	0.801889	sp.O14981.BTAF1_HUMAN	0.0183134	0.238161	2.19635e-06	-0.245481	3.28503e-05	0.483642	Scaling	Scaling	Buffering	Buffering
925	BTBD1	BTBD1	0.0405032	0.215224	1.12689e-07	-0.327618	1.39948e-05	0.542841	sp.Q9H0C5.BTBD1_HUMAN	0.0851557	0.358701	0.891012	0.0105271	0.100275	0.348174	Buffering	Scaling	Scaling	Buffering
926	BTBD10	BTBD10	2.71577e-06	0.594216	5.71776e-07	-0.365666	4.15857e-11	0.959881	sp.Q9BSF8.BTBDA_HUMAN	0.0974454	0.263729	0.00799662	-0.287315	0.00346059	0.551044	Scaling	Scaling	Scaling	Scaling
927	BTBD11	BTBD11	0.747907	-0.0741137	0.691354	0.0714705	0.589847	-0.145584	sp.A6QL63.BTBDB_HUMAN	0.229989	0.612175	0.13175	-1.01458	0.044858	1.62675	Buffering	Buffering	Scaling	Scaling
928	BTBD2	BTBD2	0.0722748	0.277485	5.74542e-06	-0.307104	0.000672649	0.584588	sp.Q9BX70.BTBD2_HUMAN	0.50661	-0.114177	0.100667	-0.109472	0.978063	-0.00470542	Scaling	Scaling	Anti-Scaling	Buffering
929	BTBD9	BTBD9	0.459363	0.0868911	0.000769715	-0.230616	0.0137483	0.317507	sp.Q96Q07.BTBD9_HUMAN	0.220539	0.196792	0.518684	0.0737457	0.487422	0.123047	Buffering	Buffering	Buffering	Buffering
930	BTD	BTD	0.0314735	0.543806	0.00272554	-0.278162	0.00252766	0.821968	sp.P43251.BTD_HUMAN	0.792826	0.0608042	0.869679	-0.0151401	0.744762	0.0759443	Scaling	Scaling	Buffering	Buffering
931	BTF3	BTF3	0.000362247	0.299872	7.97023e-14	-0.447435	1.22947e-12	0.747307	sp.P20290.BTF3_HUMAN	0.506983	0.0840528	0.0265734	-0.215948	0.03932	0.3	Scaling	Scaling	Buffering	Buffering
932	BTF3L4	BTF3L4	1.30841e-07	0.606607	7.81125e-07	-0.382238	5.42623e-13	0.988845	sp.Q96K17.BT3L4_HUMAN	0.104555	0.285052	0.00221522	-0.316937	0.002206	0.601989	Scaling	Scaling	Scaling	Scaling
933	BTN2A1	BTN2A1	0.000464752	0.360005	0.000286945	-0.295696	3.89995e-08	0.655701	sp.Q7KYR7.BT2A1_HUMAN	0.0920848	0.226674	0.103006	-0.158212	0.0104765	0.384886	Scaling	Scaling	Buffering	Buffering
934	BTN3A1	BTN3A1	0.0317985	0.318294	0.0083674	-0.341514	0.000168079	0.659808	sp.O00481.BT3A1_HUMAN	0.0879487	0.576606	0.253328	-0.256804	0.0262275	0.83341	Scaling	Scaling	Scaling	Scaling
935	BTN3A2	BTN3A2	0.251376	0.215885	0.010673	-0.42103	0.00497685	0.636915	sp.P78410.BT3A2_HUMAN	0.526052	0.173363	0.551571	-0.152453	0.342584	0.325816	Buffering	Scaling	Buffering	Buffering
936	BTN3A3	BTN3A3	0.204121	0.232742	0.0246006	-0.300694	0.00972831	0.533436	sp.O00478.BT3A3_HUMAN	0.101586	0.330115	0.620467	-0.066016	0.0762103	0.396131	Buffering	Scaling	Scaling	Buffering
937	BTRC	BTRC	0.00324545	0.341559	2.27053e-10	-0.382696	2.79284e-07	0.724255	sp.Q9Y297.FBW1A_HUMAN	0.0576922	0.229728	0.0719306	0.110038	0.326767	0.11969	Scaling	Scaling	Buffering	Anti-Scaling
938	BUB1	BUB1	0.580219	0.0687742	0.277592	-0.114413	0.227504	0.183187	sp.O43683.BUB1_HUMAN	0.519734	0.0819419	0.801909	-0.0225538	0.45046	0.104496	Buffering	Buffering	Buffering	Buffering
939	BUB1B	BUB1B	0.38149	0.136147	1.01159e-05	-0.394259	0.00270816	0.530406	sp.O60566.3.BUB1B_HUMAN	0.819474	0.0403107	0.001528	-0.251489	0.112036	0.2918	Buffering	Scaling	Buffering	Scaling
940	BUB3	BUB3	0.149971	0.177443	6.73473e-07	-0.34664	0.000262505	0.524083	sp.O43684.BUB3_HUMAN	0.600682	0.0735849	0.0715062	-0.08479	0.269773	0.158375	Buffering	Scaling	Buffering	Buffering
941	BUD13	BUD13	0.00011089	0.264866	4.69168e-12	-0.487811	2.12069e-17	0.752678	sp.Q9BRD0.BUD13_HUMAN	0.00161405	0.240881	0.000762637	-0.241218	1.05861e-07	0.482098	Scaling	Scaling	Buffering	Buffering
942	BUD31	BUD31	4.20965e-13	0.424863	0.0872309	-0.150594	1.20816e-08	0.575457	sp.P41223.BUD31_HUMAN	0.178439	0.0631042	0.122802	-0.0855419	0.0149731	0.148646	Scaling	Buffering	Buffering	Buffering
943	BYSL	BYSL	0.00286582	0.304534	1.56548e-05	-0.333011	2.08207e-07	0.637545	sp.Q13895.BYST_HUMAN	0.171898	0.094067	0.728593	-0.0190935	0.161944	0.113161	Scaling	Scaling	Buffering	Buffering
944	BZW1	BZW1	0.000440987	0.383645	0.846677	-0.0203828	0.00347591	0.404027	sp.Q7L1Q6.4.BZW1_HUMAN	0.0194454	0.255683	0.163967	-0.127259	0.00387471	0.382942	Scaling	Buffering	Scaling	Buffering
945	BZW2	BZW2	1.43992e-05	0.34697	1.09483e-05	-0.547575	2.27823e-10	0.894545	sp.Q9Y6E2.BZW2_HUMAN	0.00913318	0.202167	0.0263456	-0.219598	5.51727e-05	0.421765	Scaling	Scaling	Buffering	Buffering
946	C10orf88	C10orf88	0.112875	0.174274	3.14418e-09	-0.33426	7.50854e-05	0.508534	sp.Q9H8K7.CJ088_HUMAN	0.448436	0.08212	0.0282171	-0.196633	0.0228761	0.278753	Buffering	Scaling	Buffering	Buffering
947	C11orf52	C11orf52	0.030316	0.517691	0.337903	-0.166423	0.00898687	0.684114	sp.Q96A22.CK052_HUMAN	0.0833042	0.615245	0.882468	-0.0452688	0.0889242	0.660514	Scaling	Buffering	Scaling	Buffering
948	C11orf54	C11orf54	0.0429858	0.240821	5.3266e-10	-0.604375	3.00605e-09	0.845196	sp.Q9H0W9.CK054_HUMAN	0.570028	0.0917995	2.49452e-05	-0.593193	0.000378382	0.684992	Buffering	Scaling	Buffering	Scaling
949	C11orf68	C11orf68	0.00612996	0.383811	0.290808	0.120186	0.0932385	0.263625	sp.Q9H3H3.2.CK068_HUMAN	0.242425	0.121454	0.428876	-0.0775359	0.110589	0.19899	Scaling	Anti-Scaling	Buffering	Buffering
950	C12orf10	C12orf10	0.298931	0.11849	0.00727266	-0.208789	0.0129278	0.327279	sp.Q9HB07.MYG1_HUMAN	0.460781	0.0895454	0.0096563	-0.226264	0.0242989	0.31581	Buffering	Buffering	Buffering	Buffering
951	C12orf29	C12orf29	0.291397	0.129131	2.08306e-05	-0.362004	0.000728435	0.491135	sp.Q8N999.CL029_HUMAN	0.667771	0.0704264	0.00028292	-0.382281	0.0155701	0.452707	Buffering	Scaling	Buffering	Scaling
952	C12orf4	C12orf4	2.33051e-07	0.463001	2.31923e-06	-0.386697	2.36307e-14	0.849698	sp.Q9NQ89.CL004_HUMAN	0.0660572	-0.161141	0.431875	-0.0616989	0.33977	-0.0994421	Scaling	Scaling	Anti-Scaling	Buffering
953	C12orf43	C12orf43	0.0530827	0.179648	0.0201689	-0.167645	0.00183599	0.347293	sp.Q96C57.CL043_HUMAN	0.00119186	0.36703	0.0150872	-0.244306	1.54583e-05	0.611335	Buffering	Buffering	Scaling	Buffering
954	C12orf45	C12orf45	0.896694	0.0179594	0.0274582	-0.195844	0.173499	0.213804	sp.Q8N5I9.CL045_HUMAN	0.511485	0.0792491	0.132484	-0.162932	0.104955	0.242181	Buffering	Buffering	Buffering	Buffering
955	C12orf57	C12orf57	0.000902998	0.432663	0.00160613	-0.350727	1.27382e-07	0.78339	sp.Q99622.C10_HUMAN	0.197457	0.174049	0.00044842	-0.41962	0.000103233	0.593669	Scaling	Scaling	Buffering	Scaling
956	C12orf65	C12orf65	0.998546	0.000212768	0.00951732	-0.190163	0.14495	0.190376	sp.Q9H3J6.CL065_HUMAN	0.454686	0.0923264	0.147289	-0.168891	0.0951534	0.261217	Buffering	Buffering	Buffering	Buffering
957	C12orf73	C12orf73	0.163492	0.171033	3.59478e-07	-0.376658	0.000119481	0.547691	sp.Q69YU5.CL073_HUMAN	0.845294	-0.0746207	0.757664	-0.0318442	0.911287	-0.0427766	Buffering	Scaling	Buffering	Buffering
958	C14orf119	C14orf119	0.000135204	0.365134	0.00290125	-0.183179	3.64721e-07	0.548313	sp.Q9NWQ9.CN119_HUMAN	0.0839934	0.182073	2.77166e-05	-0.364048	5.0027e-06	0.54612	Scaling	Buffering	Buffering	Scaling
959	C14orf93	C14orf93	0.0555246	0.170261	0.00469333	-0.185321	0.000449315	0.355582	sp.Q9H972.CN093_HUMAN	0.0223366	0.469769	0.486175	-0.133027	0.000799673	0.602796	Buffering	Buffering	Scaling	Buffering
960	C15orf39	C15orf39	0.0201849	0.479579	0.0114114	-0.238197	0.00131426	0.717776	sp.Q6ZRI6.CO039_HUMAN	0.0794846	0.413351	0.0944435	-0.165346	0.0202097	0.578697	Scaling	Buffering	Scaling	Buffering
961	C15orf40	C15orf40	0.00100291	0.416807	5.65162e-07	-0.348189	3.81025e-07	0.764996	sp.Q8WUR7.CO040_HUMAN	0.964311	-0.00675617	1.5572e-05	-0.369476	0.0247125	0.36272	Scaling	Scaling	Buffering	Scaling
962	C16orf58	C16orf58	8.18326e-06	0.475865	0.00232117	-0.226232	9.09485e-09	0.702097	sp.Q96GQ5.CP058_HUMAN	0.0473372	0.24278	0.531246	-0.0465211	0.0229787	0.289301	Scaling	Buffering	Buffering	Buffering
963	C16orf70	C16orf70	0.00212443	0.299472	5.0576e-10	-0.431184	8.38823e-10	0.730657	sp.Q9BSU1.CP070_HUMAN	0.490377	-0.0626016	0.619421	-0.033923	0.760225	-0.0286786	Scaling	Scaling	Buffering	Buffering
964	C16orf72	C16orf72	0.000100352	0.427477	5.48805e-07	-0.337205	3.35993e-09	0.764682	sp.Q14CZ0.CP072_HUMAN	0.0313514	0.574161	0.69978	0.0879395	0.120489	0.486222	Scaling	Scaling	Scaling	Buffering
965	C16orf87	C16orf87	0.00141565	0.368498	1.65345e-06	-0.393337	2.07452e-08	0.761836	sp.Q6PH81.CP087_HUMAN	0.183419	0.278328	0.0386513	-0.242723	0.0214817	0.521051	Scaling	Scaling	Scaling	Buffering
966	C17orf49	C17orf49	0.172525	0.183015	1.69132e-11	-0.494933	8.24359e-06	0.677948	tr.F8W038.F8W038_HUMAN	0.028803	0.302683	0.00725517	-0.230169	0.000282775	0.532852	Buffering	Scaling	Scaling	Buffering
967	C17orf75	C17orf75	0.109002	0.187451	0.000971507	-0.300323	0.000438791	0.487774	sp.Q9HAS0.NJMU_HUMAN	0.359877	0.0557564	0.119281	-0.116305	0.0502916	0.172061	Buffering	Scaling	Buffering	Buffering
968	C17orf80	C17orf80	1.88007e-06	0.38501	2.21844e-05	-0.327412	1.27277e-11	0.712422	sp.Q9BSJ5.CQ080_HUMAN	0.0255053	0.190906	0.0317013	-0.183565	0.000544077	0.374472	Scaling	Scaling	Buffering	Buffering
969	C17orf97	C17orf97	0.00682473	0.535931	0.015929	-0.233001	0.000238082	0.768932	sp.Q6ZQX7.CQ097_HUMAN	0.356217	0.29045	0.0249469	-0.507693	0.0187097	0.798143	Scaling	Buffering	Scaling	Scaling
970	C18orf21	C18orf21	0.000383649	0.397943	2.11497e-18	-0.495368	1.51422e-09	0.893311	sp.Q32NC0.CR021_HUMAN	0.0584845	-0.559215	0.369718	-0.0667459	0.0913098	-0.492469	Scaling	Scaling	Anti-Scaling	Buffering
971	C18orf25	C18orf25	0.00917672	0.508191	5.48792e-14	-0.479916	1.67946e-05	0.988107	sp.Q96B23.CR025_HUMAN	0.69648	0.0954199	2.15927e-09	-0.409132	0.0488832	0.504552	Scaling	Scaling	Buffering	Scaling
972	C18orf32	C18orf32	0.00253696	0.877232	1.33569e-06	-0.412253	5.72582e-05	1.28948	sp.Q8TCD1.CR032_HUMAN	0.0416261	0.517876	0.0465256	-0.179582	0.00826946	0.697458	Scaling	Scaling	Scaling	Buffering
973	C19orf12	C19orf12	0.000127796	0.422509	0.00999571	-0.279218	7.49483e-07	0.701727	sp.Q9NSK7.CS012_HUMAN	0.0578865	0.256773	0.525275	0.0900181	0.347507	0.166755	Scaling	Scaling	Scaling	Buffering
974	C19orf25	C19orf25	0.139132	0.182804	1.66122e-09	-0.344645	0.000205433	0.527449	sp.Q9UFG5.CS025_HUMAN	0.98519	-0.00337714	0.444497	-0.0434039	0.825588	0.0400267	Buffering	Scaling	Buffering	Buffering
975	C19orf47	C19orf47	0.000237623	0.325012	0.00480104	-0.241076	3.29086e-07	0.566088	sp.Q8N9M1.CS047_HUMAN	0.000469134	0.279108	0.00855331	-0.225985	3.13021e-06	0.505093	Scaling	Buffering	Scaling	Buffering
976	C19orf53	C19orf53	0.00021753	0.410441	2.18087e-05	-0.250096	2.31425e-07	0.660537	sp.Q9UNZ5.L10K_HUMAN	0.40764	0.140259	0.0116451	-0.172923	0.0796769	0.313182	Scaling	Scaling	Buffering	Buffering
977	C19orf54	C19orf54	0.269518	0.103204	2.94178e-05	-0.41634	1.92082e-05	0.519545	sp.Q5BKX5.CS054_HUMAN	0.788626	-0.0371554	0.00233227	-0.469372	0.0151016	0.432217	Buffering	Scaling	Buffering	Scaling
978	C19orf66	C19orf66	0.378547	-0.304949	0.084253	-0.218787	0.803814	-0.0861623	sp.Q9NUL5.CS066_HUMAN	0.92403	0.022721	0.0144411	-0.260969	0.242457	0.28369	Anti-Scaling	Buffering	Buffering	Scaling
979	C1D	C1D	0.00031518	0.217813	0.000950884	-0.239537	2.75692e-07	0.457351	sp.Q13901.C1D_HUMAN	0.154436	0.195073	0.333069	0.115091	0.635801	0.0799818	Buffering	Buffering	Buffering	Anti-Scaling
980	C1GALT1	C1GALT1	2.06897e-08	0.603201	0.0727671	-0.233984	9.32074e-09	0.837185	sp.Q9NS00.C1GLT_HUMAN	0.000212576	0.332376	0.198495	-0.146877	6.35568e-05	0.479254	Scaling	Buffering	Scaling	Buffering
981	C1orf109	C1orf109	0.00410547	0.329493	1.04496e-05	-0.340979	7.82868e-07	0.670472	sp.Q9NX04.CA109_HUMAN	0.879096	-0.0180729	0.00139131	-0.224599	0.111603	0.206526	Scaling	Scaling	Buffering	Buffering
982	C1orf112	C1orf112	6.67509e-05	0.315478	0.00311052	-0.289059	2.49053e-07	0.604538	sp.Q9NSG2.CA112_HUMAN	0.0366888	0.314214	0.503222	-0.152964	0.0697925	0.467179	Scaling	Scaling	Scaling	Buffering
983	C1orf122	C1orf122	0.00780823	0.327186	0.00442078	-0.227143	4.70636e-05	0.554328	sp.Q6ZSJ8.CA122_HUMAN	0.318217	0.115477	0.226968	-0.104021	0.0874024	0.219497	Scaling	Buffering	Buffering	Buffering
984	C1orf123	C1orf123	4.41711e-06	0.410547	3.01095e-12	-0.445537	2.89844e-14	0.856084	sp.Q9NWV4.CA123_HUMAN	0.569337	0.109495	0.00107176	-0.333555	0.0312839	0.44305	Scaling	Scaling	Buffering	Scaling
985	C1orf131	C1orf131	3.20278e-08	0.392067	5.20182e-07	-0.518826	1.86482e-13	0.910894	sp.Q8NDD1.3.CA131_HUMAN	0.631862	-0.0658835	0.774295	-0.0448183	0.908387	-0.0210652	Scaling	Scaling	Buffering	Buffering
986	C1orf131	C1orf131	3.20278e-08	0.392067	5.20182e-07	-0.518826	1.86482e-13	0.910894	sp.Q8NDD1.CA131_HUMAN	0.0452491	0.1603	0.123487	-0.159613	0.00551542	0.319913	Scaling	Scaling	Buffering	Buffering
987	C1orf159	C1orf159	0.0121491	0.247753	0.394895	-0.0558061	0.00520281	0.303559	sp.Q96HA4.CA159_HUMAN	0.950624	0.0128575	0.629424	0.0662383	0.813807	-0.0533809	Buffering	Buffering	Buffering	Buffering
988	C1orf174	C1orf174	0.0188222	0.276152	8.37084e-06	-0.255209	4.47447e-05	0.531361	sp.Q8IYL3.CA174_HUMAN	0.11184	0.257323	0.509544	-0.0595791	0.062302	0.316902	Scaling	Scaling	Scaling	Buffering
989	C1orf198	C1orf198	0.00121224	0.426238	0.0864528	-0.295079	0.000349467	0.721317	sp.Q9H425.CA198_HUMAN	0.0304137	0.220799	0.103066	-0.20312	0.00400243	0.423918	Scaling	Scaling	Buffering	Buffering
990	C1orf21	C1orf21	0.328942	0.205074	0.172986	-0.367663	0.0648926	0.572737	sp.Q9H246.CA021_HUMAN	0.288763	0.306854	0.630667	-0.124333	0.170506	0.431187	Buffering	Scaling	Scaling	Buffering
991	C1orf226	C1orf226	0.946665	-0.0101733	0.0586668	-0.381382	0.0968765	0.371208	sp.A1L170.2.CA226_HUMAN	0.100895	0.26665	0.996595	0.000754401	0.200883	0.265895	Buffering	Scaling	Scaling	Buffering
992	C1orf43	C1orf43	6.03118e-06	0.301814	0.000184005	-0.434014	3.11871e-08	0.735827	sp.Q9BWL3.CA043_HUMAN	0.0442956	0.165862	0.721098	0.0297354	0.179479	0.136127	Scaling	Scaling	Buffering	Buffering
993	C1orf50	C1orf50	1.50484e-06	0.418557	0.0230325	-0.149827	1.72012e-08	0.568384	sp.Q9BV19.CA050_HUMAN	0.321375	0.191001	0.11046	-0.147659	0.0927264	0.338659	Scaling	Buffering	Buffering	Buffering
994	C1orf52	C1orf52	2.60548e-05	0.457683	6.83029e-07	-0.373244	1.90651e-10	0.830927	sp.Q8N6N3.CA052_HUMAN	0.379879	0.140052	0.000108486	-0.361774	0.0042352	0.501826	Scaling	Scaling	Buffering	Scaling
995	C1orf53	C1orf53	0.0983596	0.174436	0.267767	-0.139862	0.0289781	0.314297	sp.Q5VUE5.CA053_HUMAN	0.835494	-0.0410506	0.619481	0.080043	0.579958	-0.121094	Buffering	Buffering	Buffering	Buffering
996	C1QBP	C1QBP	0.0193608	0.32556	4.35683e-17	-0.632122	1.11022e-08	0.957681	sp.Q07021.C1QBP_HUMAN	0.000823092	0.410238	2.47201e-10	-0.442154	2.37845e-09	0.852391	Scaling	Scaling	Scaling	Scaling
997	C1R	C1R	0.979002	0.00730258	0.960481	0.0124369	0.987333	-0.00513436	sp.P00736.C1R_HUMAN	0.318546	0.241316	0.326119	-0.207323	0.0981426	0.448639	Buffering	Buffering	Buffering	Buffering
998	C1RL	C1RL	0.150038	0.257731	0.0439659	-0.319248	0.00553169	0.576979	sp.Q9NZP8.C1RL_HUMAN	0.650004	0.0756148	0.0428379	-0.38008	0.0300765	0.455694	Scaling	Scaling	Buffering	Scaling
999	C1S	C1S	0.645079	-0.129445	0.926355	0.0240664	0.640018	-0.153511	sp.P09871.C1S_HUMAN	0.861321	0.0529012	0.499076	-0.165073	0.497314	0.217974	Anti-Scaling	Buffering	Buffering	Buffering
1000	C20orf27	C20orf27	7.90979e-08	0.455047	3.35157e-09	-0.542878	5.41227e-20	0.997925	sp.Q9GZN8.2.CT027_HUMAN	0.078917	0.186144	6.33005e-06	-0.544642	2.57331e-08	0.730786	Scaling	Scaling	Buffering	Scaling
1001	C22orf39	C22orf39	0.334809	0.104374	1.31271e-06	-0.349655	0.000349061	0.454029	sp.Q6P5X5.CV039_HUMAN	0.975032	0.0105362	0.0950697	-0.279899	0.401541	0.290435	Buffering	Scaling	Buffering	Scaling
1002	C2CD2	C2CD2	0.0412589	0.406735	0.0359908	-0.25411	0.00163142	0.660845	sp.Q9Y426.CU025_HUMAN	0.0287765	0.406608	0.543615	-0.0788757	0.0127789	0.485483	Scaling	Scaling	Scaling	Buffering
1003	C2CD2L	C2CD2L	0.126114	0.176555	6.5492e-08	-0.548119	2.13908e-07	0.724675	sp.O14523.2.C2C2L_HUMAN	0.109425	0.173384	0.000190654	-0.343934	2.71589e-05	0.517318	Buffering	Scaling	Buffering	Scaling
1004	C2CD3	C2CD3	0.112927	0.147395	0.0160543	-0.242176	0.00137292	0.38957	sp.Q4AC94.C2CD3_HUMAN	0.391973	-0.0977731	0.288921	-0.125009	0.849075	0.0272356	Buffering	Buffering	Buffering	Buffering
1005	C2CD5	C2CD5	1.36818e-07	0.543196	4.34516e-08	-0.449954	8.93021e-16	0.99315	tr.B4DRN7.B4DRN7_HUMAN	3.1196e-06	0.300098	0.0322558	-0.128221	3.33665e-08	0.428319	Scaling	Scaling	Scaling	Buffering
1006	C2orf49	C2orf49	0.102161	0.123103	0.0583873	-0.135689	0.00836745	0.258792	sp.Q9BVC5.ASHWN_HUMAN	0.524638	-0.0578366	0.696213	-0.0273205	0.767804	-0.0305161	Buffering	Buffering	Buffering	Buffering
1007	C2orf68	C2orf68	0.000299002	0.348688	0.0686672	-0.186586	5.17426e-05	0.535275	sp.Q2NKX9.CB068_HUMAN	0.587051	0.0899857	0.277069	-0.191559	0.194306	0.281544	Scaling	Buffering	Buffering	Buffering
1008	C2orf69	C2orf69	0.00248076	0.288921	0.0278429	-0.207213	9.40054e-05	0.496134	sp.Q8N8R5.CB069_HUMAN	0.000509336	0.370539	0.0641318	-0.16038	3.81046e-05	0.530919	Scaling	Buffering	Scaling	Buffering
1009	C2orf72	C2orf72	0.6393	0.115456	0.487292	-0.120443	0.397731	0.2359	sp.A6NCS6.CB072_HUMAN	0.193287	0.446778	0.193256	-0.410627	0.0306121	0.857405	Buffering	Buffering	Scaling	Scaling
1010	C2orf76	C2orf76	0.060327	0.177619	0.0950766	-0.164246	0.00644804	0.341864	sp.Q3KRA6.CB076_HUMAN	0.525584	-0.110723	0.0797623	-0.261396	0.46747	0.150673	Buffering	Buffering	Anti-Scaling	Scaling
1011	C3	C3	0.115888	-0.888816	0.244749	0.33435	0.0355831	-1.22317	sp.P01024.CO3_HUMAN	0.637971	-0.112966	0.568093	0.082133	0.430849	-0.195099	Anti-Scaling	Anti-Scaling	Anti-Scaling	Buffering
1012	C3orf33	C3orf33	0.168792	0.118147	0.777027	0.0293052	0.464218	0.088842	sp.Q6P1S2.CC033_HUMAN	0.0610995	0.226358	0.768381	0.0425937	0.218142	0.183764	Buffering	Buffering	Buffering	Buffering
1013	C3orf38	C3orf38	0.000549379	0.504251	8.07699e-12	-0.384112	6.17398e-07	0.888363	sp.Q5JPI3.CC038_HUMAN	0.0120356	0.303536	0.0680038	-0.0972652	0.00168264	0.400801	Scaling	Scaling	Scaling	Buffering
1014	C3orf58	C3orf58	0.000504902	0.462784	0.012851	-0.351274	6.04457e-06	0.814057	sp.Q8NDZ4.DIA1_HUMAN	1.14882e-05	0.425996	0.237643	-0.128127	2.05094e-05	0.554123	Scaling	Scaling	Scaling	Buffering
1015	C4A	C4A	0.972135	0.0072522	0.00162386	-0.444445	0.0461075	0.451697	sp.P0C0L4.CO4A_HUMAN	0.754981	0.0516214	0.572259	-0.0795388	0.506135	0.13116	Buffering	Scaling	Buffering	Buffering
1016	C4BPA	C4BPA	0.0562505	0.153619	0.725278	-0.02679	0.0753126	0.180409	sp.P04003.C4BPA_HUMAN	0.913057	-0.0286178	0.763353	0.118098	0.734664	-0.146716	Buffering	Buffering	Buffering	Anti-Scaling
1017	C5orf22	C5orf22	2.65861e-14	0.525895	0.0158922	-0.352623	3.78327e-07	0.878517	sp.Q49AR2.CE022_HUMAN	0.00340346	0.277138	0.490783	-0.0836076	0.00883106	0.360745	Scaling	Scaling	Scaling	Buffering
1018	C5orf24	C5orf24	3.70064e-06	0.487957	8.19018e-09	-0.491164	1.43949e-13	0.979121	sp.Q7Z6I8.CE024_HUMAN	0.141379	0.196621	0.0149784	-0.220271	0.00486395	0.416892	Scaling	Scaling	Buffering	Buffering
1019	C5orf30	C5orf30	0.3434	0.111639	0.0105469	-0.277767	0.00686336	0.389406	sp.Q96GV9.CE030_HUMAN	0.460829	-0.207534	0.628658	-0.108505	0.769018	-0.0990293	Buffering	Scaling	Anti-Scaling	Buffering
1020	C5orf51	C5orf51	4.39987e-11	0.39576	0.00810382	-0.35249	1.07319e-06	0.748249	sp.A6NDU8.CE051_HUMAN	0.0103695	0.216442	0.111006	-0.259436	0.00697396	0.475879	Scaling	Scaling	Buffering	Scaling
1021	C6orf106	C6orf106	0.000256424	0.339734	0.0168331	-0.194084	3.0839e-06	0.533818	sp.Q9H6K1.CF106_HUMAN	0.0134082	0.270403	3.73021e-05	-0.391594	8.36735e-07	0.661996	Scaling	Buffering	Scaling	Scaling
1022	C6orf132	C6orf132	0.509754	-0.230686	0.512948	0.172869	0.309418	-0.403555	sp.Q5T0Z8.CF132_HUMAN	0.567852	-0.149428	0.633764	-0.0879474	0.830457	-0.061481	Anti-Scaling	Anti-Scaling	Anti-Scaling	Buffering
1023	C6orf136	C6orf136	0.0673412	0.164475	5.1143e-05	-0.320483	1.83706e-05	0.484958	sp.Q5SQH8.4.CF136_HUMAN	0.897392	-0.01969	0.967603	0.0054395	0.888162	-0.0251295	Buffering	Scaling	Buffering	Buffering
1024	C6orf203	C6orf203	0.0340581	0.314093	5.78817e-16	-0.471347	9.17069e-06	0.78544	sp.Q9P0P8.CF203_HUMAN	0.0297478	0.597528	0.32336	-0.0820693	0.0163429	0.679597	Scaling	Scaling	Scaling	Buffering
1025	C6orf47	C6orf47	0.0150063	0.216502	0.00948646	-0.196993	0.000148018	0.413495	sp.O95873.CF047_HUMAN	0.171886	0.173436	0.584232	-0.0697482	0.137676	0.243184	Buffering	Buffering	Buffering	Buffering
1026	C6orf89	C6orf89	0.00208226	0.379733	0.000189635	-0.298554	1.59886e-06	0.678287	sp.Q6UWU4.2.CF089_HUMAN	0.208609	0.185622	0.428951	-0.0734359	0.11241	0.259058	Scaling	Scaling	Buffering	Buffering
1027	C7	C7	0.0163225	-0.168543	0.283882	-0.107668	0.457579	-0.0608753	sp.P10643.CO7_HUMAN	0.0288485	-0.315364	0.907316	0.0406219	0.310295	-0.355986	Anti-Scaling	Buffering	Anti-Scaling	Buffering
1028	C7orf25	C7orf25	1.6122e-11	0.4504	0.0278245	-0.2348	1.72679e-08	0.6852	sp.Q9BPX7.2.CG025_HUMAN	1.06641e-06	0.372392	0.554165	-0.0732953	0.000789315	0.445687	Scaling	Buffering	Scaling	Buffering
1029	C7orf26	C7orf26	2.17887e-07	0.343586	1.09597e-08	-0.543449	5.58271e-16	0.887035	sp.Q96N11.CG026_HUMAN	0.0313854	0.121906	0.0123748	-0.225227	0.000197379	0.347133	Scaling	Scaling	Buffering	Buffering
1030	C7orf43	C7orf43	2.04675e-06	0.320872	0.000190408	-0.399584	1.84167e-09	0.720456	sp.Q8WVR3.CG043_HUMAN	0.162814	0.117045	0.0716096	-0.191303	0.00668232	0.308348	Scaling	Scaling	Buffering	Buffering
1031	C7orf50	C7orf50	3.55481e-11	0.522911	0.00394938	-0.407082	6.32922e-09	0.929993	sp.Q9BRJ6.CG050_HUMAN	0.00087519	0.210978	0.0294012	-0.267143	0.000171918	0.478121	Scaling	Scaling	Buffering	Scaling
1032	C8orf33	C8orf33	0.000165172	0.271919	0.174669	-0.147548	0.000443137	0.419467	sp.Q9H7E9.2.CH033_HUMAN	0.00041075	0.317	0.106168	-0.220591	0.000431262	0.537591	Scaling	Buffering	Scaling	Buffering
1033	C8orf37	C8orf37	0.000288407	0.254219	0.00503482	-0.248121	1.12511e-06	0.50234	sp.Q96NL8.CH037_HUMAN	0.91094	0.0135795	0.0940508	-0.243556	0.11814	0.257136	Scaling	Buffering	Buffering	Buffering
1034	C8orf59	C8orf59	1.2892e-12	0.472543	6.44902e-08	-0.460326	2.24496e-18	0.932869	sp.Q8N0T1.CH059_HUMAN	0.57897	0.040738	0.738074	-0.0373662	0.50623	0.0781042	Scaling	Scaling	Buffering	Buffering
1035	C8orf76	C8orf76	7.89476e-07	0.329238	0.00140812	-0.298931	3.77126e-09	0.628169	sp.Q96K31.CH076_HUMAN	0.805869	0.0597709	0.302513	-0.291693	0.278794	0.351464	Scaling	Scaling	Buffering	Scaling
1036	C8orf82	C8orf82	7.95669e-07	0.435246	0.0764749	-0.239024	8.27706e-06	0.67427	sp.Q6P1X6.CH082_HUMAN	0.00601766	0.220874	0.66953	-0.0474502	0.0257091	0.268325	Scaling	Buffering	Buffering	Buffering
1037	C9orf40	C9orf40	0.448177	0.0912128	1.47443e-10	-0.50195	8.9663e-06	0.593163	sp.Q8IXQ3.CI040_HUMAN	0.845733	-0.0385232	3.1995e-05	-0.631407	0.00707283	0.592884	Buffering	Scaling	Buffering	Scaling
1038	C9orf64	C9orf64	0.147598	0.27446	0.29006	-0.150982	0.0329229	0.425442	sp.Q5T6V5.CI064_HUMAN	0.107399	0.25702	0.0468292	-0.234703	0.00471645	0.491722	Scaling	Buffering	Scaling	Buffering
1039	C9orf72	C9orf72	0.823471	0.0418011	6.08605e-11	-0.613739	0.00111642	0.65554	sp.Q96LT7.CI072_HUMAN	0.512093	-0.107278	0.0613274	-0.249799	0.369256	0.142521	Buffering	Scaling	Anti-Scaling	Buffering
1040	C9orf78	C9orf78	0.00142323	0.264751	2.25878e-07	-0.380739	8.85356e-10	0.64549	sp.Q9NZ63.CI078_HUMAN	0.595695	0.0583553	0.00378442	-0.258891	0.0127866	0.317246	Scaling	Scaling	Buffering	Scaling
1041	C9orf85	C9orf85	2.95963e-05	0.299279	6.88035e-09	-0.413719	1.23031e-13	0.712998	sp.Q96MD7.1.CI085_HUMAN	0.0500861	0.501109	0.0226512	-0.354915	0.00288898	0.856023	Scaling	Scaling	Scaling	Scaling
1042	CA1	CA1	0.342056	0.149935	0.460939	-0.06838	0.159573	0.218315	sp.P00915.CAH1_HUMAN	0.910712	-0.0119663	0.0074302	-0.317965	0.0260744	0.305999	Buffering	Buffering	Buffering	Scaling
1043	CA12	CA12	0.00960364	1.49447	0.044625	-0.485202	0.00114727	1.97968	sp.O43570.CAH12_HUMAN	0.0383908	0.897028	0.181663	-0.262059	0.00958258	1.15909	Scaling	Scaling	Scaling	Scaling
1044	CA13	CA13	0.011661	0.29685	0.00168698	-0.3973	4.71336e-06	0.694149	sp.Q8N1Q1.CAH13_HUMAN	0.00202847	0.543843	0.981062	0.00432326	0.0115419	0.53952	Scaling	Scaling	Scaling	Buffering
1045	CA2	CA2	0.0118328	0.70495	0.0159807	-0.654701	6.04606e-05	1.35965	sp.P00918.CAH2_HUMAN	0.006289	0.665244	0.0964556	-0.451214	0.00067921	1.11646	Scaling	Scaling	Scaling	Scaling
1046	CA3	CA3	0.00754846	0.267391	0.807059	-0.0323246	0.0628344	0.299715	sp.P07451.CAH3_HUMAN	0.190594	0.486338	0.707875	-0.129323	0.195278	0.615661	Scaling	Buffering	Scaling	Buffering
1047	CA8	CA8	0.283101	0.243329	0.179472	-0.336185	0.0468232	0.579514	sp.P35219.CAH8_HUMAN	0.275807	0.230259	0.318573	-0.25752	0.0833629	0.487779	Buffering	Scaling	Buffering	Scaling
1048	CA9	CA9	0.444912	0.29809	0.403716	-0.163385	0.228055	0.461474	sp.Q16790.CAH9_HUMAN	0.577648	0.237018	0.678371	-0.104955	0.446535	0.341974	Scaling	Buffering	Buffering	Buffering
1049	CAAP1	CAAP1	0.8622	0.0314504	2.27361e-15	-0.70283	0.000371591	0.734281	sp.Q9H8G2.CAAP1_HUMAN	0.342467	-0.10175	9.98477e-05	-0.293891	0.0938235	0.192141	Buffering	Scaling	Anti-Scaling	Scaling
1050	CAB39	CAB39	0.510518	0.0846001	0.313116	-0.102417	0.225368	0.187017	sp.Q9Y376.CAB39_HUMAN	0.307539	0.112525	0.00426306	-0.267785	0.00442361	0.38031	Buffering	Buffering	Buffering	Scaling
1051	CAB39L	CAB39L	0.0166453	0.633882	0.00625778	-0.288189	0.000808862	0.922071	sp.Q9H9S4.CB39L_HUMAN	0.00394874	1.03319	0.561393	-0.0938527	0.00199482	1.12705	Scaling	Scaling	Scaling	Buffering
1052	CABIN1	CABIN1	0.0024446	0.408755	0.000164415	-0.315477	2.1064e-06	0.724232	sp.Q9Y6J0.CABIN_HUMAN	0.990825	0.00202683	0.280648	-0.0647731	0.708987	0.0668	Scaling	Scaling	Buffering	Buffering
1053	CABLES1	CABLES1	0.00194567	1.24774	0.6577	0.0681976	0.00285423	1.17955	sp.Q8TDN4.CABL1_HUMAN	0.00413853	0.551484	0.264292	0.103723	0.0154228	0.447761	Scaling	Buffering	Scaling	Anti-Scaling
1054	CACFD1	CACFD1	0.0843037	0.272302	0.487857	-0.0888583	0.044172	0.36116	sp.Q9UGQ2.FLOWR_HUMAN	0.16184	0.224222	0.806549	-0.0404532	0.143816	0.264675	Scaling	Buffering	Buffering	Buffering
1055	CACHD1	CACHD1	0.000463829	0.948847	0.43898	-0.106524	0.000215888	1.05537	sp.Q5VU97.CAHD1_HUMAN	0.0379586	0.844815	0.384579	-0.206511	0.0122553	1.05133	Scaling	Buffering	Scaling	Buffering
1056	CACNA2D1	CACNA2D1	0.00190196	0.579356	0.47812	0.137231	0.0471498	0.442125	sp.P54289.4.CA2D1_HUMAN	0.00588383	1.41283	0.251301	0.917161	0.536629	0.495664	Scaling	Anti-Scaling	Scaling	Anti-Scaling
1057	CACNA2D1	CACNA2D1	0.00190196	0.579356	0.47812	0.137231	0.0471498	0.442125	sp.P54289.2.CA2D1_HUMAN	0.000146631	0.715604	0.0547241	0.388561	0.153955	0.327043	Scaling	Anti-Scaling	Scaling	Anti-Scaling
1058	CACTIN	CACTIN	0.202395	0.168687	3.27748e-06	-0.24786	0.0040005	0.416547	sp.Q8WUQ7.2.CATIN_HUMAN	0.738238	0.0407014	0.200877	-0.058534	0.4242	0.0992354	Buffering	Buffering	Buffering	Buffering
1059	CACUL1	CACUL1	0.0329886	0.287897	5.35115e-06	-0.291356	0.000166236	0.579253	sp.Q86Y37.CACL1_HUMAN	0.928606	-0.0122858	2.70421e-06	-0.28724	0.058197	0.274954	Scaling	Scaling	Buffering	Scaling
1060	CACYBP	CACYBP	0.000601717	0.252857	0.000546702	-0.412483	8.34931e-07	0.66534	sp.Q9HB71.CYBP_HUMAN	0.00394411	0.258744	0.0190093	-0.290567	0.000127305	0.549311	Scaling	Scaling	Scaling	Scaling
1061	CAD	CAD	0.00205897	0.333856	0.0580855	-0.211157	0.000186712	0.545013	sp.P27708.PYR1_HUMAN	0.306391	0.108113	0.00672589	-0.312562	0.00438758	0.420675	Scaling	Buffering	Buffering	Scaling
1062	CADM1	CADM1	0.838282	-0.0746027	0.15966	0.411977	0.231731	-0.486579	sp.Q9BY67.3.CADM1_HUMAN	0.7377	0.100322	0.693546	0.0838364	0.959093	0.0164856	Buffering	Anti-Scaling	Buffering	Buffering
1063	CADM4	CADM4	0.726513	-0.0837278	0.0204411	-0.467893	0.131115	0.384165	sp.Q8NFZ8.CADM4_HUMAN	0.37098	0.148082	0.0458791	-0.304784	0.0150587	0.452867	Buffering	Scaling	Buffering	Scaling
1064	CADPS	CADPS	0.790382	0.114075	0.292587	-0.152783	0.536843	0.266858	sp.Q9ULU8.2.CAPS1_HUMAN	0.980795	-0.0093825	0.0380291	-0.261279	0.522663	0.251896	Buffering	Buffering	Buffering	Scaling
1065	CADPS2	CADPS2	0.0107675	0.457645	0.142034	-0.297206	0.000962254	0.754852	sp.Q86UW7.2.CAPS2_HUMAN	0.746917	0.102013	0.895795	0.0509388	0.896033	0.0510742	Scaling	Scaling	Buffering	Buffering
1066	CALB1	CALB1	0.241902	0.303682	0.613952	-0.132418	0.171875	0.4361	sp.P05937.CALB1_HUMAN	0.233589	-0.295201	0.399355	-0.277289	0.960884	-0.0179125	Scaling	Buffering	Anti-Scaling	Scaling
1067	CALB2	CALB2	0.023514	1.03388	0.231895	-0.288885	0.00599935	1.32276	sp.P22676.CALB2_HUMAN	0.0424264	0.73542	0.420266	-0.154323	0.0202828	0.889743	Scaling	Scaling	Scaling	Buffering
1068	CALCOCO1	CALCOCO1	0.427543	0.130975	0.0696338	-0.238404	0.0661418	0.369379	sp.Q9P1Z2.CACO1_HUMAN	0.637365	0.0576221	0.204514	-0.120164	0.212459	0.177787	Buffering	Buffering	Buffering	Buffering
1069	CALCOCO2	CALCOCO2	0.00183267	0.304248	0.0119349	-0.310639	3.03648e-05	0.614887	sp.Q13137.4.CACO2_HUMAN	0.134473	0.141922	0.0192814	-0.265763	0.00250433	0.407685	Scaling	Scaling	Buffering	Scaling
1070	CALD1	CALD1	0.000489337	1.07891	0.0151188	0.760672	0.375407	0.318234	sp.Q05682.CALD1_HUMAN	8.93583e-06	0.889006	0.119276	0.352349	0.0365268	0.536657	Scaling	Anti-Scaling	Scaling	Anti-Scaling
1071	CALD1	CALD1	0.000489337	1.07891	0.0151188	0.760672	0.375407	0.318234	sp.Q05682.2.CALD1_HUMAN	0.00550593	0.781464	0.00213754	0.872129	0.77452	-0.0906643	Scaling	Anti-Scaling	Scaling	Anti-Scaling
1072	CALD1	CALD1	0.000489337	1.07891	0.0151188	0.760672	0.375407	0.318234	sp.Q05682.5.CALD1_HUMAN	0.000393388	0.662759	0.213767	0.248149	0.0733494	0.41461	Scaling	Anti-Scaling	Scaling	Anti-Scaling
1073	CALM2	CALM2	0.0513358	0.179613	0.0445263	-0.187885	0.00269751	0.367497	tr.H0Y7A7.H0Y7A7_HUMAN	0.273035	-0.153727	0.369661	-0.122288	0.856254	-0.0314389	Buffering	Buffering	Anti-Scaling	Buffering
1074	CALML3	CALML3	0.0305253	-0.150328	0.191969	0.163222	0.00581331	-0.31355	sp.P27482.CALL3_HUMAN	0.763521	-0.0778834	0.489894	-0.101028	0.93054	0.0231442	Anti-Scaling	Anti-Scaling	Buffering	Buffering
1075	CALR	CALR	0.297232	0.203037	0.0435709	-0.162974	0.0701018	0.366012	sp.P27797.CALR_HUMAN	0.190706	0.158698	0.33744	-0.0610445	0.0787608	0.219742	Buffering	Buffering	Buffering	Buffering
1076	CALU	CALU	2.08855e-09	0.87326	0.860531	-0.0293018	6.02679e-06	0.902562	sp.O43852.3.CALU_HUMAN	7.16171e-09	0.616128	0.98199	-0.00277668	9.8712e-06	0.618905	Scaling	Buffering	Scaling	Buffering
1077	CALU	CALU	2.08855e-09	0.87326	0.860531	-0.0293018	6.02679e-06	0.902562	sp.O43852.4.CALU_HUMAN	3.29425e-06	0.529532	0.588198	0.0832885	0.00684868	0.446243	Scaling	Buffering	Scaling	Buffering
1078	CAMK1	CAMK1	0.920162	0.0532663	4.22353e-06	-0.813761	0.115593	0.867027	sp.Q14012.KCC1A_HUMAN	0.502849	0.404868	0.000400045	-0.675176	0.0902434	1.08004	Buffering	Scaling	Scaling	Scaling
1079	CAMK1D	CAMK1D	0.0640557	0.55888	0.00850432	-0.397313	0.00238821	0.956193	sp.Q8IU85.KCC1D_HUMAN	0.204629	0.320974	0.000238229	-0.460414	0.00379457	0.781388	Scaling	Scaling	Scaling	Scaling
1080	CAMK2B	CAMK2B	0.857017	0.0192334	0.00361646	-0.276598	0.00332594	0.295832	sp.Q13554.KCC2B_HUMAN	0.0588483	0.13371	0.731283	-0.0416698	0.155689	0.17538	Buffering	Scaling	Buffering	Buffering
1081	CAMK2D	CAMK2D	0.678206	0.170342	0.0115589	-0.351948	0.213606	0.52229	sp.Q13557.11.KCC2D_HUMAN	0.218875	0.28259	0.0282113	-0.228895	0.0348418	0.511485	Buffering	Scaling	Scaling	Buffering
1082	CAMK2G	CAMK2G	0.00308111	0.436555	0.00828799	-0.26088	5.18831e-05	0.697435	sp.Q13555.8.KCC2G_HUMAN	0.038736	0.311612	0.356941	-0.0747532	0.0169626	0.386365	Scaling	Scaling	Scaling	Buffering
1083	CAMK4	CAMK4	0.251216	0.31055	0.852948	-0.0332014	0.252942	0.343752	sp.Q16566.KCC4_HUMAN	0.844309	0.0667283	0.879538	0.0441638	0.956676	0.0225645	Scaling	Buffering	Buffering	Buffering
1084	CAMKK1	CAMKK1	0.112618	0.281312	0.134699	-0.156787	0.0149169	0.438099	sp.Q8N5S9.KKCC1_HUMAN	0.567652	0.148352	0.278453	-0.161959	0.228975	0.310311	Scaling	Buffering	Buffering	Buffering
1085	CAMKK2	CAMKK2	0.114484	0.194571	6.22839e-05	-0.337085	0.000249682	0.531656	sp.Q96RR4.KKCC2_HUMAN	0.0380012	0.335613	0.000374547	-0.402575	0.000129557	0.738187	Buffering	Scaling	Scaling	Scaling
1086	CAMKMT	CAMKMT	0.255122	0.109472	6.36141e-05	-0.42052	4.81041e-05	0.529993	sp.Q7Z624.CMKMT_HUMAN	0.732468	0.0383497	0.117653	-0.166615	0.14078	0.204964	Buffering	Scaling	Buffering	Buffering
1087	CAMLG	CAMLG	6.07583e-08	0.57226	5.9491e-09	-0.431969	3.59508e-15	1.00423	sp.P49069.CAMLG_HUMAN	0.129225	0.204743	0.267556	-0.0826401	0.0447654	0.287384	Scaling	Scaling	Buffering	Buffering
1088	CAMSAP1	CAMSAP1	0.0403624	0.1984	4.80858e-06	-0.346568	2.32668e-06	0.544968	sp.Q5T5Y3.3.CAMP1_HUMAN	0.658028	0.0369619	9.49289e-05	-0.243872	0.00274965	0.280834	Buffering	Scaling	Buffering	Buffering
1089	CAMSAP2	CAMSAP2	0.0150644	0.280786	0.584773	-0.072099	0.0192502	0.352885	sp.Q08AD1.CAMP2_HUMAN	0.152604	0.130142	0.712924	-0.0300758	0.133937	0.160218	Scaling	Buffering	Buffering	Buffering
1090	CAMSAP3	CAMSAP3	0.00869788	-0.854319	0.733328	0.0570785	0.00605901	-0.911397	sp.Q9P1Y5.CAMP3_HUMAN	0.0735668	-1.5401	0.705046	-0.0482772	0.0825211	-1.49183	Anti-Scaling	Buffering	Anti-Scaling	Buffering
1091	CAND1	CAND1	0.196692	0.13554	0.507556	-0.0724587	0.139591	0.207998	sp.Q86VP6.CAND1_HUMAN	0.816675	0.0262292	0.0715158	-0.16645	0.158903	0.192679	Buffering	Buffering	Buffering	Buffering
1092	CAND2	CAND2	0.594394	0.185232	0.00852708	-0.293454	0.177136	0.478687	sp.O75155.CAND2_HUMAN	0.334514	-0.237037	0.0844741	-0.134404	0.676514	-0.102632	Buffering	Scaling	Anti-Scaling	Buffering
1093	CANT1	CANT1	3.09663e-06	0.519072	0.135283	-0.191024	5.90486e-06	0.710097	sp.Q8WVQ1.CANT1_HUMAN	0.0212839	0.24602	0.345772	-0.119158	0.0167505	0.365178	Scaling	Buffering	Buffering	Buffering
1094	CANX	CANX	0.000488775	0.399775	0.0696993	-0.161685	2.82463e-05	0.56146	sp.P27824.CALX_HUMAN	0.0510849	0.162461	0.19749	-0.0789674	0.00914353	0.241429	Scaling	Buffering	Buffering	Buffering
1095	CAP1	CAP1	0.013587	0.322132	1.39802e-05	-0.395012	2.17144e-06	0.717144	sp.Q01518.CAP1_HUMAN	0.384672	-0.133771	2.06557e-05	-0.379064	0.134186	0.245294	Scaling	Scaling	Anti-Scaling	Scaling
1096	CAP2	CAP2	0.106053	0.515455	0.948505	0.0131044	0.14833	0.50235	sp.P40123.CAP2_HUMAN	0.0844684	0.302913	0.744395	0.0498233	0.228963	0.253089	Scaling	Buffering	Scaling	Buffering
1097	CAPG	CAPG	0.826222	-0.0869573	0.127928	0.524892	0.202128	-0.611849	sp.P40121.CAPG_HUMAN	0.329129	-0.258524	0.544623	0.134156	0.218	-0.39268	Buffering	Anti-Scaling	Anti-Scaling	Anti-Scaling
1098	CAPN1	CAPN1	0.0470081	0.309915	0.857096	-0.0240867	0.0721324	0.334001	sp.P07384.CAN1_HUMAN	0.966778	0.00427986	0.0088169	-0.246699	0.0346932	0.250979	Scaling	Buffering	Buffering	Buffering
1099	CAPN15	CAPN15	0.000413827	0.453375	3.30063e-09	-0.440997	4.57224e-09	0.894373	sp.O75808.CAN15_HUMAN	0.00318121	0.426891	0.0974491	-0.124274	0.000338084	0.551164	Scaling	Scaling	Scaling	Buffering
1100	CAPN2	CAPN2	0.6536	-0.095114	0.00590867	0.557685	0.00891025	-0.652799	sp.P17655.CAN2_HUMAN	0.942194	-0.00992757	0.155851	0.218421	0.212702	-0.228349	Buffering	Anti-Scaling	Buffering	Anti-Scaling
1101	CAPN5	CAPN5	0.58398	0.116709	0.748469	-0.0562853	0.473847	0.172995	sp.O15484.CAN5_HUMAN	0.336831	0.174926	0.497125	-0.0923866	0.164959	0.267312	Buffering	Buffering	Buffering	Buffering
1102	CAPN7	CAPN7	0.00416356	0.358251	9.82428e-07	-0.305507	7.81236e-06	0.663758	sp.Q9Y6W3.CAN7_HUMAN	0.193387	0.172179	5.03447e-07	-0.380272	0.000378745	0.552451	Scaling	Scaling	Buffering	Scaling
1103	CAPNS1	CAPNS1	9.59669e-05	0.408448	0.321335	-0.0920899	7.43472e-05	0.500538	sp.P04632.CPNS1_HUMAN	0.629121	-0.0517266	0.376428	-0.0855373	0.78941	0.0338107	Scaling	Buffering	Buffering	Buffering
1104	CAPRIN1	CAPRIN1	5.17924e-05	0.314735	0.000146882	-0.26339	2.77606e-09	0.578125	sp.Q14444.CAPR1_HUMAN	0.0174761	0.196519	0.0950716	-0.0975904	0.00141944	0.29411	Scaling	Scaling	Buffering	Buffering
1105	CAPS	CAPS	0.355129	0.395069	0.787123	-0.0478157	0.311816	0.442885	sp.Q13938.CAYP1_HUMAN	0.298247	0.457428	0.209926	0.212995	0.584988	0.244433	Scaling	Buffering	Scaling	Anti-Scaling
1106	CAPZA1	CAPZA1	0.0165964	0.233974	0.000108537	-0.277095	1.03702e-05	0.511069	sp.P52907.CAZA1_HUMAN	0.0802105	0.121429	0.0942384	-0.082144	0.00861866	0.203573	Buffering	Scaling	Buffering	Buffering
1107	CAPZA2	CAPZA2	2.95097e-09	0.456382	0.000144122	-0.378241	1.62013e-13	0.834623	sp.P47755.CAZA2_HUMAN	1.89451e-06	0.326563	0.0420308	-0.206237	2.61067e-06	0.532799	Scaling	Scaling	Scaling	Buffering
1108	CAPZB	CAPZB	0.00833721	0.297176	0.000662304	-0.236881	2.67511e-05	0.534058	sp.P47756.2.CAPZB_HUMAN	0.406202	0.0926095	0.0424798	-0.121621	0.0745079	0.21423	Scaling	Buffering	Buffering	Buffering
1109	CAPZB	CAPZB	0.00833721	0.297176	0.000662304	-0.236881	2.67511e-05	0.534058	sp.P47756.CAPZB_HUMAN	0.590425	0.0262542	0.168813	-0.0453884	0.181193	0.0716427	Scaling	Buffering	Buffering	Buffering
1110	CARD10	CARD10	0.0847862	0.638355	0.973528	0.00522012	0.0840221	0.633135	sp.Q9BWT7.CAR10_HUMAN	0.84564	-0.0592373	0.643881	0.0559574	0.703298	-0.115195	Scaling	Buffering	Buffering	Buffering
1111	CARD11	CARD11	0.658525	0.100851	0.955266	-0.0181806	0.725298	0.119031	sp.Q9BXL7.CAR11_HUMAN	0.286096	0.278015	0.401577	0.29074	0.97101	-0.0127256	Buffering	Buffering	Scaling	Anti-Scaling
1112	CARD16	CARD16	0.762699	0.0914984	0.502022	0.156512	0.845271	-0.065014	sp.Q5EG05.CAR16_HUMAN	0.271757	0.513002	0.0698496	-0.634738	0.0214722	1.14774	Buffering	Anti-Scaling	Scaling	Scaling
1113	CARD8	CARD8	0.00860885	0.334396	4.38578e-05	-0.433446	1.11411e-07	0.767841	sp.Q9Y2G2.5.CARD8_HUMAN	0.052943	0.397026	0.0815307	-0.303746	0.00287905	0.700773	Scaling	Scaling	Scaling	Scaling
1114	CARHSP1	CARHSP1	0.00384472	0.399706	0.0139885	-0.252171	4.46309e-05	0.651877	sp.Q9Y2V2.CHSP1_HUMAN	0.00673333	0.565551	0.00298141	-0.304483	9.3749e-05	0.870034	Scaling	Scaling	Scaling	Scaling
1115	CARM1	CARM1	0.0394779	0.28152	2.38024e-08	-0.360077	5.04386e-05	0.641597	sp.Q86X55.CARM1_HUMAN	0.512208	0.100938	1.19927e-09	-0.372876	0.00505852	0.473815	Scaling	Scaling	Buffering	Scaling
1116	CARS	CARS	0.0775067	0.238497	1.68348e-09	-0.480201	3.24292e-06	0.718698	sp.P49589.3.SYCC_HUMAN	0.41082	0.106543	3.74694e-06	-0.384616	0.00067461	0.491159	Buffering	Scaling	Buffering	Scaling
1117	CARS2	CARS2	0.000555185	0.355049	1.88268e-11	-0.527805	1.67663e-12	0.882853	sp.Q9HA77.SYCM_HUMAN	0.00662205	0.388716	0.00051272	-0.289006	9.40129e-06	0.677723	Scaling	Scaling	Scaling	Scaling
1118	CASC3	CASC3	0.0225597	0.199813	0.0257909	-0.208065	0.000611987	0.407878	sp.O15234.CASC3_HUMAN	0.115346	0.14352	0.869274	0.0154297	0.278845	0.12809	Buffering	Buffering	Buffering	Buffering
1119	CASC4	CASC4	0.0268456	0.308208	0.00199621	-0.251629	0.000356742	0.559837	sp.Q6P4E1.4.CASC4_HUMAN	0.11552	0.210821	0.624195	-0.0364732	0.0745993	0.247294	Scaling	Scaling	Buffering	Buffering
1120	CASD1	CASD1	0.000133207	0.341164	1.54903e-06	-0.488905	4.56545e-13	0.830069	sp.Q96PB1.CASD1_HUMAN	0.27724	0.228816	0.956664	0.0166548	0.474289	0.212161	Scaling	Scaling	Buffering	Buffering
1121	CASKIN1	CASKIN1	0.42324	0.146042	0.462593	-0.0611767	0.270743	0.207219	sp.Q8WXD9.CSKI1_HUMAN	0.237019	0.206575	0.783479	0.0307279	0.348662	0.175847	Buffering	Buffering	Buffering	Buffering
1122	CASKIN2	CASKIN2	0.00119391	0.416492	0.210575	-0.164817	0.000517864	0.581309	sp.Q8WXE0.CSKI2_HUMAN	0.000145092	0.280773	0.219072	-0.0806051	5.73462e-05	0.361378	Scaling	Buffering	Scaling	Buffering
1123	CASP1	CASP1	0.412165	0.261802	0.304346	0.265146	0.992665	-0.00334453	sp.P29466.CASP1_HUMAN	0.176015	0.335578	0.782159	-0.0534645	0.156727	0.389043	Scaling	Anti-Scaling	Scaling	Buffering
1124	CASP10	CASP10	0.202681	-0.263685	0.0115317	-0.32912	0.766954	0.0654351	sp.Q92851.4.CASPA_HUMAN	0.0531341	-0.640857	0.0316542	-0.513213	0.73144	-0.127644	Anti-Scaling	Scaling	Anti-Scaling	Scaling
1125	CASP2	CASP2	0.00053548	0.25567	0.000492799	-0.356114	1.54559e-08	0.611784	sp.P42575.CASP2_HUMAN	0.0428956	0.17994	0.00690091	-0.316974	6.07753e-05	0.496915	Scaling	Scaling	Buffering	Scaling
1126	CASP3	CASP3	0.0369942	0.518517	2.72695e-05	-0.298259	0.00307422	0.816776	sp.P42574.CASP3_HUMAN	0.0230874	0.496163	7.90973e-06	-0.339599	0.000820136	0.835762	Scaling	Scaling	Scaling	Scaling
1127	CASP4	CASP4	0.0134267	0.60758	0.291206	-0.220049	0.00313056	0.827629	sp.P49662.CASP4_HUMAN	0.0277416	0.321209	0.258272	-0.143872	0.00503701	0.465081	Scaling	Buffering	Scaling	Buffering
1128	CASP5	CASP5	0.724707	0.0245153	0.00945992	-0.0723256	0.144334	0.0968408	sp.P51878.5.CASP5_HUMAN	0.00470139	0.590089	0.321475	-0.366546	0.0158444	0.956635	Buffering	Buffering	Scaling	Scaling
1129	CASP6	CASP6	0.43259	0.283494	0.00070073	-0.281506	0.13235	0.565001	sp.P55212.CASP6_HUMAN	0.104027	0.501573	4.13135e-06	-0.355447	0.0110289	0.85702	Scaling	Scaling	Scaling	Scaling
1130	CASP7	CASP7	0.17004	0.272782	0.000343626	-0.336055	0.00513513	0.608837	sp.P55210.3.CASP7_HUMAN	0.141542	0.28146	0.00391626	-0.253592	0.00917301	0.535052	Scaling	Scaling	Scaling	Scaling
1131	CASP8	CASP8	0.218856	0.201753	0.00824493	-0.350537	0.0054683	0.552291	sp.Q14790.9.CASP8_HUMAN	0.12929	0.20725	0.00131372	-0.342978	0.000648094	0.550229	Buffering	Scaling	Buffering	Scaling
1132	CASP8AP2	CASP8AP2	0.0296535	0.304702	4.30326e-10	-0.432808	7.37956e-06	0.73751	sp.Q9UKL3.C8AP2_HUMAN	0.00434954	0.486233	0.474553	-0.0818799	0.00142672	0.568113	Scaling	Scaling	Scaling	Buffering
1133	CASP9	CASP9	0.000617753	0.413041	0.0298881	-0.192416	1.25833e-05	0.605457	sp.P55211.CASP9_HUMAN	0.969895	-0.0054345	0.0445884	-0.211285	0.204493	0.205851	Scaling	Buffering	Buffering	Buffering
1134	CAST	CAST	0.000571792	0.587063	0.53883	-0.0842595	0.000445053	0.671323	sp.P20810.6.ICAL_HUMAN	0.000893629	0.639267	0.151739	-0.181259	0.00012405	0.820526	Scaling	Buffering	Scaling	Buffering
1135	CASZ1	CASZ1	0.218901	0.254383	0.0946471	0.266268	0.959834	-0.0118845	sp.Q86V15.CASZ1_HUMAN	0.201254	0.262763	0.0190702	0.385259	0.60505	-0.122496	Scaling	Anti-Scaling	Scaling	Anti-Scaling
1136	CAT	CAT	0.551244	0.0969834	0.000230444	-0.467473	0.00299992	0.564456	sp.P04040.CATA_HUMAN	0.122203	0.268824	0.0105899	-0.278265	0.00434635	0.547089	Buffering	Scaling	Scaling	Scaling
1137	CAV1	CAV1	0.021211	0.801028	0.00365986	1.31256	0.27425	-0.511535	sp.Q03135.CAV1_HUMAN	0.514562	0.132683	0.0110429	0.666575	0.052601	-0.533892	Scaling	Anti-Scaling	Buffering	Anti-Scaling
1138	CAV2	CAV2	0.0967233	0.491867	0.00810665	0.938684	0.216405	-0.446817	sp.P51636.CAV2_HUMAN	0.466905	0.164915	0.101573	0.480943	0.276784	-0.316028	Scaling	Anti-Scaling	Buffering	Anti-Scaling
1139	CBFA2T2	CBFA2T2	0.000341763	0.266835	0.860382	0.0317191	0.202211	0.235116	sp.O43439.4.MTG8R_HUMAN	0.0309785	0.190068	0.190095	-0.261302	0.032873	0.45137	Scaling	Buffering	Buffering	Scaling
1140	CBFA2T3	CBFA2T3	0.0583499	-0.420102	0.426467	-0.148943	0.273523	-0.271159	sp.O75081.MTG16_HUMAN	0.049054	-0.492315	0.771595	0.0953495	0.0972226	-0.587664	Anti-Scaling	Buffering	Anti-Scaling	Buffering
1141	CBFB	CBFB	0.113383	0.202948	5.90893e-07	-0.424115	2.22707e-05	0.627063	sp.Q13951.2.PEBB_HUMAN	0.062374	0.232041	0.0142387	-0.225357	0.000996207	0.457399	Buffering	Scaling	Buffering	Buffering
1142	CBFB	CBFB	0.113383	0.202948	5.90893e-07	-0.424115	2.22707e-05	0.627063	sp.Q13951.PEBB_HUMAN	0.482505	0.123839	0.0554226	-0.241287	0.0598483	0.365126	Buffering	Scaling	Buffering	Buffering
1143	CBL	CBL	0.0477296	0.209394	4.19838e-06	-0.356977	1.89969e-06	0.566371	sp.P22681.CBL_HUMAN	0.21602	0.139344	6.19981e-05	-0.332191	0.000169898	0.471535	Buffering	Scaling	Buffering	Scaling
1144	CBLB	CBLB	0.134251	0.190563	0.0876793	-0.240806	0.0119766	0.431369	sp.Q13191.CBLB_HUMAN	0.748525	0.0299241	0.592587	-0.0720741	0.477368	0.101998	Buffering	Buffering	Buffering	Buffering
1145	CBLL1	CBLL1	2.33376e-12	0.39887	0.000115406	-0.323029	3.83366e-13	0.7219	sp.Q75N03.HAKAI_HUMAN	0.952638	0.00398975	0.319207	-0.0788	0.343822	0.0827898	Scaling	Scaling	Buffering	Buffering
1146	CBR1	CBR1	0.00477874	0.647669	0.856488	0.0349579	0.0119133	0.612711	sp.P16152.CBR1_HUMAN	0.0379844	0.374792	0.189687	-0.154139	0.00622878	0.528931	Scaling	Buffering	Scaling	Buffering
1147	CBR3	CBR3	0.0355913	0.652438	0.829576	0.0381898	0.0509492	0.614249	sp.O75828.CBR3_HUMAN	0.023502	0.632242	0.433274	-0.104854	0.00923452	0.737096	Scaling	Buffering	Scaling	Buffering
1148	CBR4	CBR4	0.693023	-0.0794338	1.96451e-13	-0.515943	0.0463059	0.436509	sp.Q8N4T8.CBR4_HUMAN	0.608166	-0.125097	0.0642338	-0.180525	0.819082	0.0554282	Buffering	Scaling	Anti-Scaling	Buffering
1149	CBS	CBS	0.0909334	0.545219	0.245173	-0.28573	0.0165874	0.830949	sp.P35520.2.CBS_HUMAN	0.0363328	0.502485	0.0751753	-0.264693	0.00234392	0.767178	Scaling	Scaling	Scaling	Scaling
1150	CBWD1	CBWD1	0.533302	0.122565	3.53909e-13	-0.686849	0.00020891	0.809415	sp.Q9BRT8.CBWD1_HUMAN	0.290076	0.152715	7.82524e-07	-0.399424	0.000296574	0.552139	Buffering	Scaling	Buffering	Scaling
1151	CBWD2	CBWD2	0.794665	-0.0286476	0.266459	-0.0847681	0.653618	0.0561206	sp.Q8IUF1.CBWD2_HUMAN	0.966414	0.0138722	0.300351	-0.191333	0.568879	0.205205	Buffering	Buffering	Buffering	Buffering
1152	CBX1	CBX1	0.000455549	0.375775	0.198799	-0.143672	0.000214098	0.519447	sp.P83916.CBX1_HUMAN	0.0731172	0.185815	0.96178	-0.00506931	0.164374	0.190884	Scaling	Buffering	Buffering	Buffering
1153	CBX2	CBX2	0.390266	0.15764	0.498466	-0.135588	0.238667	0.293228	sp.Q14781.CBX2_HUMAN	0.525215	0.104091	0.113265	0.241673	0.493982	-0.137582	Buffering	Buffering	Buffering	Anti-Scaling
1154	CBX3	CBX3	2.33796e-11	0.388595	8.48139e-07	-0.403241	8.53215e-16	0.791836	sp.Q13185.CBX3_HUMAN	0.555308	0.0433311	0.276593	-0.148557	0.15796	0.191888	Scaling	Scaling	Buffering	Buffering
1155	CBX4	CBX4	0.805342	0.0310372	0.109618	-0.207219	0.147502	0.238256	sp.O00257.CBX4_HUMAN	0.850738	0.0166601	0.103855	-0.145229	0.159308	0.161889	Buffering	Buffering	Buffering	Buffering
1156	CBX5	CBX5	0.317352	-0.171236	0.00287076	-0.330367	0.398841	0.159131	sp.P45973.CBX5_HUMAN	0.230299	0.183892	0.0896698	-0.195033	0.0341252	0.378924	Anti-Scaling	Scaling	Buffering	Buffering
1157	CBX6	CBX6	2.38586e-06	0.703903	7.52955e-07	-0.530411	4.2389e-12	1.23431	sp.O95503.CBX6_HUMAN	0.169872	0.257075	0.281747	-0.117158	0.0593304	0.374233	Scaling	Scaling	Scaling	Buffering
1158	CBX8	CBX8	0.354719	0.0833774	0.0613119	-0.184582	0.0253207	0.267959	sp.Q9HC52.CBX8_HUMAN	0.728907	0.0279069	0.655368	-0.0452659	0.534694	0.0731728	Buffering	Buffering	Buffering	Buffering
1159	CC2D1A	CC2D1A	0.000534668	0.462289	1.79732e-06	-0.331543	3.18533e-07	0.793832	sp.Q6P1N0.C2D1A_HUMAN	0.76442	0.0369724	4.8484e-05	-0.229544	0.0417647	0.266517	Scaling	Scaling	Buffering	Buffering
1160	CC2D1B	CC2D1B	1.18806e-05	0.399344	3.66732e-05	-0.34332	9.46145e-11	0.742664	sp.Q5T0F9.2.C2D1B_HUMAN	0.482497	0.066978	0.000345602	-0.268511	0.00314792	0.335489	Scaling	Scaling	Buffering	Scaling
1161	CCAR1	CCAR1	0.00247645	0.370688	3.80898e-06	-0.261631	6.73031e-06	0.632319	sp.Q8IX12.CCAR1_HUMAN	0.584871	-0.0526185	0.00141419	-0.161573	0.282213	0.108954	Scaling	Scaling	Buffering	Buffering
1162	CCAR2	CCAR2	6.78355e-05	0.509008	4.7396e-21	-0.631257	1.37447e-12	1.14026	sp.Q8N163.CCAR2_HUMAN	0.0574586	0.176942	6.43019e-11	-0.323811	1.92189e-06	0.500752	Scaling	Scaling	Buffering	Scaling
1163	CCDC102A	CCDC102A	0.841448	0.0339183	0.00253782	-0.304298	0.0580855	0.338217	sp.Q96A19.C102A_HUMAN	0.41817	0.123905	0.0220343	-0.213658	0.0356067	0.337563	Buffering	Scaling	Buffering	Buffering
1164	CCDC106	CCDC106	0.300851	0.196663	0.0414368	-0.328134	0.0138109	0.524798	sp.Q9BWC9.CC106_HUMAN	0.371055	0.163735	0.351693	-0.125334	0.117855	0.28907	Buffering	Scaling	Buffering	Buffering
1165	CCDC115	CCDC115	0.15928	0.103983	0.00137875	-0.284965	0.000303984	0.388947	sp.Q96NT0.CC115_HUMAN	0.844383	0.0192713	0.608486	0.0415405	0.847403	-0.0222692	Buffering	Scaling	Buffering	Buffering
1166	CCDC117	CCDC117	0.381363	0.1538	6.71404e-09	-0.399821	0.00402045	0.553621	sp.Q8IWD4.CC117_HUMAN	0.903092	0.0216632	0.000122027	-0.308844	0.075613	0.330508	Buffering	Scaling	Buffering	Scaling
1167	CCDC12	CCDC12	0.113313	0.284447	3.15023e-17	-0.550196	0.00014407	0.834643	sp.Q8WUD4.CCD12_HUMAN	0.707549	0.0770383	0.0702373	-0.138214	0.300007	0.215252	Scaling	Scaling	Buffering	Buffering
1168	CCDC124	CCDC124	0.000257799	0.421551	0.00020313	-0.226761	7.80047e-07	0.648311	sp.Q96CT7.CC124_HUMAN	0.176261	0.265048	1.99579e-06	-0.331823	0.00488409	0.596871	Scaling	Buffering	Scaling	Scaling
1169	CCDC126	CCDC126	1.95077e-10	0.537766	0.0630843	-0.221453	3.86886e-08	0.759219	sp.Q96EE4.CC126_HUMAN	0.00192951	0.457282	0.20127	-0.620033	0.0316183	1.07732	Scaling	Buffering	Scaling	Scaling
1170	CCDC127	CCDC127	5.02333e-12	0.407413	0.000217092	-0.377333	2.22371e-10	0.784747	sp.Q96BQ5.CC127_HUMAN	3.3074e-08	0.333164	0.0452895	-0.213981	6.50449e-06	0.547145	Scaling	Scaling	Scaling	Buffering
1171	CCDC130	CCDC130	1.19549e-05	0.633082	2.51384e-09	-0.372688	4.43851e-09	1.00577	sp.P13994.CC130_HUMAN	0.0819088	0.222348	0.0278925	-0.12895	0.0104574	0.351298	Scaling	Scaling	Buffering	Buffering
1172	CCDC134	CCDC134	0.000178521	0.572946	2.67601e-10	-0.450501	2.30367e-08	1.02345	sp.Q9H6E4.CC134_HUMAN	0.00333644	0.500618	1.76831e-06	-0.342827	1.22494e-05	0.843445	Scaling	Scaling	Scaling	Scaling
1173	CCDC137	CCDC137	7.32961e-06	0.366394	0.00313761	-0.268705	2.92445e-08	0.635099	sp.Q6PK04.CC137_HUMAN	0.0306826	0.168286	0.0133834	-0.237698	0.000441221	0.405983	Scaling	Scaling	Buffering	Buffering
1174	CCDC138	CCDC138	0.770692	-0.042112	0.0235444	-0.212448	0.293022	0.170336	sp.Q96M89.CC138_HUMAN	0.838732	-0.0540593	0.217348	0.301365	0.284613	-0.355424	Buffering	Buffering	Buffering	Anti-Scaling
1175	CCDC14	CCDC14	0.335541	0.0983645	0.0184326	-0.335361	0.00717788	0.433725	sp.Q49A88.CCD14_HUMAN	0.000544016	0.321294	0.0698507	-0.277372	0.000515264	0.598667	Buffering	Scaling	Scaling	Scaling
1176	CCDC141	CCDC141	0.709967	0.048987	0.48185	-0.0313332	0.555419	0.0803202	tr.H7C0P1.H7C0P1_HUMAN	0.880582	-0.0614613	0.556493	-0.12528	0.885376	0.0638185	Buffering	Buffering	Buffering	Buffering
1177	CCDC15	CCDC15	0.137281	0.152686	0.0617463	-0.155225	0.00754426	0.307911	sp.Q0P6D6.CCD15_HUMAN	0.378465	-0.138639	0.267565	-0.191005	0.782791	0.0523665	Buffering	Buffering	Anti-Scaling	Buffering
1178	CCDC150	CCDC150	0.156207	0.182543	0.0033282	-0.339214	0.00100247	0.521757	sp.Q8NCX0.CC150_HUMAN	0.377746	0.108272	0.212375	-0.194952	0.100292	0.303224	Buffering	Scaling	Buffering	Buffering
1179	CCDC154	CCDC154	0.582431	0.087423	0.0859078	-0.109529	0.227998	0.196952	sp.A6NI56.CC154_HUMAN	0.991703	-0.00325434	0.317802	0.130313	0.679372	-0.133567	Buffering	Buffering	Buffering	Anti-Scaling
1180	CCDC167	CCDC167	0.079735	0.319918	0.0135854	-0.269742	0.00323953	0.58966	sp.Q9P0B6.CC167_HUMAN	0.0763609	0.220951	0.0253136	-0.178439	0.00401268	0.39939	Scaling	Scaling	Buffering	Buffering
1181	CCDC168	CCDC168	0.559722	0.0128971	8.99539e-05	-0.0140061	0.225152	0.0269032	sp.Q8NDH2.CC168_HUMAN	0.716122	0.147768	0.636668	-0.0686959	0.597808	0.216464	Buffering	Buffering	Buffering	Buffering
1182	CCDC174	CCDC174	0.039816	0.209933	7.40231e-14	-0.386411	5.05514e-06	0.596344	sp.Q6PII3.CC174_HUMAN	0.470662	0.13744	1.33883e-05	-0.273117	0.0429477	0.410557	Buffering	Scaling	Buffering	Scaling
1183	CCDC175	CCDC175	0.538156	-0.0128137	0.593366	-0.0102154	0.910472	-0.00259823	sp.P0C221.CC175_HUMAN	0.674025	-0.0669702	0.872282	-0.0170185	0.766402	-0.0499517	Buffering	Buffering	Buffering	Buffering
1184	CCDC18	CCDC18	0.00621217	0.386087	2.97133e-05	-0.381045	2.57702e-06	0.767132	tr.J3KP97.J3KP97_HUMAN	0.0173401	0.470484	0.158636	0.165792	0.13369	0.304691	Scaling	Scaling	Scaling	Anti-Scaling
1185	CCDC25	CCDC25	1.95249e-06	0.441253	1.36461e-23	-0.626785	5.31485e-18	1.06804	sp.Q86WR0.CCD25_HUMAN	0.00197093	0.460075	2.10795e-10	-0.571289	2.08505e-09	1.03136	Scaling	Scaling	Scaling	Scaling
1186	CCDC28A	CCDC28A	0.00451151	0.396953	1.56887e-15	-0.584782	2.54018e-08	0.981735	sp.Q8IWP9.CC28A_HUMAN	0.410847	-0.280175	0.0352594	-0.211515	0.837977	-0.0686609	Scaling	Scaling	Anti-Scaling	Buffering
1187	CCDC28B	CCDC28B	0.0203559	0.534468	0.000366665	-0.530307	4.05441e-05	1.06477	sp.Q9BUN5.CC28B_HUMAN	0.803224	0.11655	0.934299	-0.031628	0.793325	0.148178	Scaling	Scaling	Buffering	Buffering
1188	CCDC43	CCDC43	0.000359701	0.246273	0.00013303	-0.32399	3.50884e-08	0.570263	sp.Q96MW1.CCD43_HUMAN	0.0144616	0.266253	0.247172	-0.139369	0.00682668	0.405622	Buffering	Scaling	Scaling	Buffering
1189	CCDC47	CCDC47	4.21002e-06	0.360556	0.0678724	-0.191892	7.34831e-06	0.552447	sp.Q96A33.CCD47_HUMAN	0.801818	0.017157	0.0261585	-0.179721	0.0397926	0.196878	Scaling	Buffering	Buffering	Buffering
1190	CCDC50	CCDC50	0.187347	0.204213	0.113268	-0.322917	0.0244147	0.52713	sp.Q8IVM0.2.CCD50_HUMAN	0.772175	-0.0351212	0.000524066	-0.451214	0.00605499	0.416093	Buffering	Scaling	Buffering	Scaling
1191	CCDC50	CCDC50	0.187347	0.204213	0.113268	-0.322917	0.0244147	0.52713	sp.Q8IVM0.CCD50_HUMAN	0.33598	-0.221439	0.142958	-0.481339	0.474555	0.2599	Buffering	Scaling	Anti-Scaling	Scaling
1192	CCDC51	CCDC51	0.212838	0.19464	5.32269e-12	-0.428808	0.000713299	0.623448	sp.Q96ER9.CCD51_HUMAN	0.865297	-0.0226696	0.000476668	-0.219323	0.151318	0.196653	Buffering	Scaling	Buffering	Buffering
1193	CCDC57	CCDC57	0.448582	0.0949106	0.0022734	-0.443376	0.0019369	0.538286	sp.Q2TAC2.CCD57_HUMAN	0.917324	0.0187618	0.596493	0.0952319	0.746432	-0.07647	Buffering	Scaling	Buffering	Buffering
1194	CCDC58	CCDC58	0.00111282	0.32352	0.126823	-0.173073	0.000531666	0.496593	tr.H7C525.H7C525_HUMAN	7.70787e-05	0.327565	0.0141205	-0.252975	2.14879e-06	0.580541	Scaling	Buffering	Scaling	Scaling
1195	CCDC59	CCDC59	0.413728	0.0806111	7.11576e-09	-0.441113	1.93719e-05	0.521724	sp.Q9P031.TAP26_HUMAN	0.6672	0.0522246	0.0116136	-0.191408	0.0735614	0.243632	Buffering	Scaling	Buffering	Buffering
1196	CCDC6	CCDC6	0.00878657	0.335541	0.000520768	-0.310393	2.16889e-05	0.645934	sp.Q16204.CCDC6_HUMAN	0.205547	0.156323	3.92154e-05	-0.293533	0.00133599	0.449856	Scaling	Scaling	Buffering	Scaling
1197	CCDC61	CCDC61	0.0133375	0.212532	0.00721968	-0.193217	5.42219e-05	0.405749	sp.Q9Y6R9.CCD61_HUMAN	0.459484	0.0989456	0.657363	-0.0519923	0.347631	0.150938	Buffering	Buffering	Buffering	Buffering
1198	CCDC71L	CCDC71L	6.24817e-05	0.50933	0.571991	0.0956457	0.0268288	0.413684	sp.Q8N9Z2.CC71L_HUMAN	0.00373864	0.310344	0.600338	0.0678951	0.0856091	0.242449	Scaling	Buffering	Scaling	Buffering
1199	CCDC77	CCDC77	3.29368e-05	0.396142	0.00102787	-0.2897	7.2833e-09	0.685842	sp.Q9BR77.CCD77_HUMAN	0.0395519	0.253517	0.128363	-0.150912	0.00255716	0.404428	Scaling	Scaling	Scaling	Buffering
1200	CCDC8	CCDC8	0.185327	0.330673	0.253962	-0.198515	0.0496665	0.529188	sp.Q9H0W5.CCDC8_HUMAN	0.363922	0.296349	0.49978	-0.348557	0.253372	0.644906	Scaling	Buffering	Scaling	Scaling
1201	CCDC80	CCDC80	0.131764	0.466351	0.0659939	0.750579	0.528826	-0.284227	sp.Q76M96.2.CCD80_HUMAN	0.426639	0.195995	0.235692	0.439891	0.5341	-0.243897	Scaling	Anti-Scaling	Buffering	Anti-Scaling
1202	CCDC82	CCDC82	0.00949964	0.297628	3.26735e-05	-0.527371	8.86736e-08	0.824999	sp.Q8N4S0.CCD82_HUMAN	0.000665255	0.378408	0.00213042	-0.368082	5.43924e-07	0.74649	Scaling	Scaling	Scaling	Scaling
1203	CCDC84	CCDC84	0.00137023	0.353361	5.39399e-08	-0.599035	8.60406e-12	0.952397	sp.Q86UT8.CCD84_HUMAN	0.144919	0.1392	0.000474534	-0.321104	4.42365e-05	0.460304	Scaling	Scaling	Buffering	Scaling
1204	CCDC85B	CCDC85B	0.107108	0.239131	0.737999	-0.0451023	0.103434	0.284233	sp.Q15834.CC85B_HUMAN	0.720767	0.0353544	0.593854	0.0478491	0.908813	-0.0124947	Buffering	Buffering	Buffering	Buffering
1205	CCDC85C	CCDC85C	3.57429e-05	0.586153	0.00013706	-0.562724	2.98616e-10	1.14888	sp.A6NKD9.CC85C_HUMAN	0.89741	0.0165003	0.000269684	-0.400992	0.00478963	0.417492	Scaling	Scaling	Buffering	Scaling
1206	CCDC86	CCDC86	0.170523	0.179229	0.257792	-0.110699	0.0537108	0.289929	sp.Q9H6F5.CCD86_HUMAN	0.608755	0.0448993	0.277935	-0.08336	0.193158	0.128259	Buffering	Buffering	Buffering	Buffering
1207	CCDC88A	CCDC88A	7.88653e-05	0.817839	0.687431	0.0758091	0.00238347	0.74203	sp.Q3V6T2.GRDN_HUMAN	0.00090234	0.468298	0.488001	-0.0974527	0.00179463	0.565751	Scaling	Buffering	Scaling	Buffering
1208	CCDC88B	CCDC88B	0.701061	-0.0721498	0.0274924	-0.337021	0.203354	0.264871	sp.A6NC98.CC88B_HUMAN	0.449789	-0.145822	0.283219	-0.164373	0.925822	0.0185508	Buffering	Scaling	Anti-Scaling	Buffering
1209	CCDC88C	CCDC88C	0.163859	0.250411	7.95704e-09	-1.03086	1.27317e-08	1.28127	sp.Q9P219.DAPLE_HUMAN	0.939438	-0.00871818	0.000839049	-0.376937	0.00769985	0.368219	Scaling	Scaling	Buffering	Scaling
1210	CCDC9	CCDC9	0.0311596	0.167854	0.00568924	-0.231831	5.2407e-05	0.399685	sp.Q9Y3X0.CCDC9_HUMAN	0.259558	0.099655	0.00755977	-0.208026	0.00240445	0.307681	Buffering	Buffering	Buffering	Buffering
1211	CCDC90B	CCDC90B	0.000305771	0.303597	2.57117e-05	-0.383155	2.02868e-09	0.686752	sp.Q9GZT6.CC90B_HUMAN	0.000832166	0.307425	0.114748	-0.117359	4.42423e-05	0.424784	Scaling	Scaling	Scaling	Buffering
1212	CCDC91	CCDC91	3.00371e-05	0.463408	0.598229	-0.0622253	0.000114789	0.525633	sp.Q7Z6B0.CCD91_HUMAN	9.61371e-08	0.649962	0.577139	-0.0611317	7.5517e-07	0.711093	Scaling	Buffering	Scaling	Buffering
1213	CCDC92	CCDC92	0.864306	0.0301209	0.336753	-0.142349	0.413441	0.17247	sp.Q53HC0.CCD92_HUMAN	0.0653992	0.395667	0.182468	0.223178	0.465335	0.172488	Buffering	Buffering	Scaling	Anti-Scaling
1214	CCDC93	CCDC93	0.0203547	0.187475	0.0679647	-0.154779	0.00142336	0.342254	sp.Q567U6.CCD93_HUMAN	0.252715	0.100484	0.587333	-0.0419965	0.173184	0.14248	Buffering	Buffering	Buffering	Buffering
1215	CCDC97	CCDC97	1.54301e-07	0.433433	7.93812e-07	-0.339174	4.83911e-15	0.772607	sp.Q96F63.CCD97_HUMAN	0.00164008	0.306474	0.0298032	-0.159217	1.47597e-05	0.465691	Scaling	Scaling	Scaling	Buffering
1216	CCHCR1	CCHCR1	0.000348154	0.393156	0.00338478	-0.30163	9.50269e-07	0.694787	sp.Q8TD31.2.CCHCR_HUMAN	0.0502371	0.289765	0.749574	0.0392889	0.14552	0.250476	Scaling	Scaling	Scaling	Buffering
1217	CCL5	CCL5	0.875868	-0.0364152	0.867406	-0.0437818	0.981659	0.00736662	sp.P13501.CCL5_HUMAN	0.278497	-0.580304	0.0829111	-0.74953	0.763274	0.169227	Buffering	Buffering	Anti-Scaling	Scaling
1218	CCM2	CCM2	1.70656e-10	0.470461	0.0782001	-0.196269	1.57824e-07	0.66673	sp.Q9BSQ5.CCM2_HUMAN	5.05458e-10	0.398475	0.392608	-0.0965146	4.03595e-05	0.49499	Scaling	Buffering	Scaling	Buffering
1219	CCNA2	CCNA2	0.51588	0.131271	1.72803e-06	-0.355142	0.0287973	0.486414	sp.P20248.CCNA2_HUMAN	0.279246	0.58035	0.0183001	-0.185182	0.16158	0.765532	Buffering	Scaling	Scaling	Buffering
1220	CCNB1	CCNB1	0.111824	0.22043	0.000170714	-0.319835	0.000523232	0.540265	sp.P14635.CCNB1_HUMAN	0.584996	0.0852278	0.211888	-0.110323	0.24213	0.19555	Buffering	Scaling	Buffering	Buffering
1221	CCNB2	CCNB2	0.00510649	0.333469	0.000331288	-0.287334	9.43731e-06	0.620803	sp.O95067.CCNB2_HUMAN	0.880646	0.0330611	0.0138691	-0.221845	0.269244	0.254906	Scaling	Scaling	Buffering	Buffering
1222	CCNC	CCNC	0.0157701	0.208892	1.94233e-11	-0.454705	3.12779e-09	0.663597	sp.P24863.CCNC_HUMAN	0.120955	0.173878	0.0412335	-0.120888	0.0135092	0.294766	Buffering	Scaling	Buffering	Buffering
1223	CCND1	CCND1	0.0209295	0.71405	0.00104571	0.849382	0.680715	-0.135332	sp.P24385.CCND1_HUMAN	0.0451117	0.406891	0.199131	0.220994	0.419066	0.185897	Scaling	Anti-Scaling	Scaling	Anti-Scaling
1224	CCND3	CCND3	0.10556	0.318981	0.176659	-0.18725	0.0214157	0.50623	sp.P30281.CCND3_HUMAN	0.270128	0.225485	0.249431	-0.295151	0.0781289	0.520636	Scaling	Buffering	Buffering	Scaling
1225	CCNDBP1	CCNDBP1	0.336052	0.132031	1.67032e-05	-0.34218	0.00187502	0.474212	sp.O95273.CCDB1_HUMAN	0.140112	0.220971	0.575784	-0.0596875	0.0943713	0.280659	Buffering	Scaling	Buffering	Buffering
1226	CCNE1	CCNE1	0.00934644	0.468939	0.0534238	-0.240376	0.00045596	0.709315	sp.P24864.CCNE1_HUMAN	0.632084	0.157656	0.37293	0.178993	0.951035	-0.0213371	Scaling	Buffering	Buffering	Anti-Scaling
1227	CCNH	CCNH	1.81505e-05	0.483155	7.05359e-06	-0.387736	1.73701e-10	0.870891	sp.P51946.CCNH_HUMAN	0.0595976	0.152688	0.213037	-0.0813561	0.0123297	0.234044	Scaling	Scaling	Buffering	Buffering
1228	CCNK	CCNK	0.00361143	0.283802	2.89957e-08	-0.42461	4.2069e-09	0.708412	sp.O75909.CCNK_HUMAN	0.848545	0.0117668	0.0137302	-0.114951	0.0599922	0.126718	Scaling	Scaling	Buffering	Buffering
1229	CCNL1	CCNL1	9.50884e-06	0.365403	0.00746604	-0.386519	4.79831e-06	0.751922	sp.Q9UK58.CCNL1_HUMAN	0.0324769	0.138042	0.132594	-0.105989	0.00389848	0.244031	Scaling	Scaling	Buffering	Buffering
1230	CCNL2	CCNL2	0.000765335	0.488583	0.0888276	-0.151447	6.61591e-05	0.640029	sp.Q96S94.CCNL2_HUMAN	0.853446	-0.0331815	0.00456999	-0.246667	0.262671	0.213485	Scaling	Buffering	Buffering	Buffering
1231	CCNT1	CCNT1	0.526833	0.0525764	4.45237e-07	-0.320348	0.000141097	0.372924	sp.O60563.CCNT1_HUMAN	0.0576996	0.183194	0.0467717	-0.168244	0.00348122	0.351439	Buffering	Scaling	Buffering	Buffering
1232	CCNT2	CCNT2	0.153	0.125364	0.000139785	-0.311189	0.000101607	0.436552	sp.O60583.CCNT2_HUMAN	0.729449	0.036793	0.0237188	-0.194458	0.0697086	0.231251	Buffering	Scaling	Buffering	Buffering
1233	CCNY	CCNY	0.0689649	0.244348	8.17556e-07	-0.359422	6.14284e-05	0.60377	sp.Q8ND76.CCNY_HUMAN	0.00142262	0.424632	0.202603	-0.0938968	0.000244876	0.518529	Buffering	Scaling	Scaling	Buffering
1234	CCNYL1	CCNYL1	0.00808767	0.353678	0.971152	-0.00463435	0.032834	0.358313	sp.Q8N7R7.CCYL1_HUMAN	0.153559	0.181593	0.522526	0.06401	0.422386	0.117583	Scaling	Buffering	Buffering	Buffering
1235	CCP110	CCP110	0.0960565	0.272482	3.49914e-05	-0.336425	0.000600259	0.608907	sp.O43303.CP110_HUMAN	0.152759	0.2363	0.000115349	-0.324534	0.00159912	0.560834	Scaling	Scaling	Buffering	Scaling
1236	CCPG1	CCPG1	0.193488	0.366803	0.019614	-0.291985	0.0271804	0.658788	sp.Q9ULG6.5.CCPG1_HUMAN	0.233387	0.253353	0.445789	-0.0779735	0.135969	0.331327	Scaling	Scaling	Scaling	Buffering
1237	CCS	CCS	0.0634267	0.156558	0.907066	0.0104709	0.190293	0.146087	sp.O14618.CCS_HUMAN	0.840882	0.0230095	0.286598	-0.0934431	0.350049	0.116453	Buffering	Buffering	Buffering	Buffering
1238	CCSER2	CCSER2	0.0281581	0.337487	0.0161391	-0.204263	0.00144866	0.54175	sp.Q9H7U1.3.CCSE2_HUMAN	0.0679266	0.216643	0.0525013	-0.165837	0.00414228	0.38248	Scaling	Buffering	Buffering	Buffering
1239	CCT2	CCT2	0.0701815	0.176179	0.466862	-0.0899492	0.0739751	0.266129	sp.P78371.TCPB_HUMAN	0.824924	-0.0173929	0.784625	-0.017462	0.999416	6.90715e-05	Buffering	Buffering	Buffering	Buffering
1240	CCT3	CCT3	0.00230372	0.210235	0.000165484	-0.419891	4.23336e-07	0.630126	sp.P49368.TCPG_HUMAN	0.933323	0.00449504	0.157046	-0.111905	0.180134	0.1164	Buffering	Scaling	Buffering	Buffering
1241	CCT4	CCT4	0.000288827	0.284153	0.074803	-0.159872	7.75148e-05	0.444025	sp.P50991.TCPD_HUMAN	0.425425	-0.0518737	0.0119961	-0.188218	0.128481	0.136345	Scaling	Buffering	Buffering	Buffering
1242	CCT5	CCT5	1.71349e-19	0.633277	0.00133467	-0.462197	8.95636e-10	1.09547	sp.P48643.TCPE_HUMAN	0.877649	-0.00707531	0.00973834	-0.183206	0.0157407	0.176131	Scaling	Scaling	Buffering	Buffering
1243	CCT6A	CCT6A	1.01591e-06	0.33028	0.00392499	-0.284929	1.14574e-08	0.615209	sp.P40227.TCPZ_HUMAN	0.888143	-0.00654455	0.276143	-0.0789487	0.325382	0.0724042	Scaling	Scaling	Buffering	Buffering
1244	CCT7	CCT7	0.00050695	0.321574	0.0125399	-0.227122	7.66916e-06	0.548696	sp.Q99832.TCPH_HUMAN	0.298145	-0.0630178	0.0203606	-0.157466	0.242472	0.0944479	Scaling	Buffering	Buffering	Buffering
1245	CCT8	CCT8	0.000211336	0.498346	1.42388e-07	-0.332966	4.41713e-08	0.831312	sp.P50990.TCPQ_HUMAN	0.302398	-0.0824934	3.3794e-05	-0.207211	0.136565	0.124717	Scaling	Scaling	Buffering	Buffering
1246	CCZ1	CCZ1	6.05608e-10	0.413137	1.67045e-06	-0.532232	2.81469e-13	0.945369	sp.P86791.CCZ1_HUMAN	0.0018133	0.1611	0.0415822	-0.155362	7.23898e-05	0.316462	Scaling	Scaling	Buffering	Buffering
1247	CD109	CD109	0.634416	0.200968	0.244964	0.249003	0.910723	-0.0480358	sp.Q6YHK3.CD109_HUMAN	0.622106	0.167723	0.169285	0.226798	0.86522	-0.0590745	Buffering	Anti-Scaling	Buffering	Anti-Scaling
1248	CD14	CD14	0.584152	0.106805	0.569945	0.0816723	0.908485	0.0251326	sp.P08571.CD14_HUMAN	0.318914	0.363627	0.611342	-0.122318	0.21898	0.485945	Buffering	Buffering	Scaling	Buffering
1249	CD151	CD151	0.000322138	0.592761	0.272654	-0.124635	1.00206e-05	0.717396	sp.P48509.CD151_HUMAN	0.0265947	0.401462	0.84653	0.0219679	0.0428206	0.379494	Scaling	Buffering	Scaling	Buffering
1250	CD22	CD22	0.00595688	-0.632924	0.114651	-0.351303	0.263859	-0.281621	sp.P20273.CD22_HUMAN	0.0510071	-0.556119	0.0770504	-0.447202	0.725138	-0.108917	Anti-Scaling	Scaling	Anti-Scaling	Scaling
1251	CD274	CD274	0.15704	0.526634	0.359699	0.150659	0.308138	0.375975	sp.Q9NZQ7.PD1L1_HUMAN	0.235296	0.527913	0.022941	0.427317	0.81695	0.100596	Scaling	Anti-Scaling	Scaling	Anti-Scaling
1252	CD276	CD276	0.0862233	0.555898	0.299183	0.16713	0.220837	0.388768	sp.Q5ZPR3.CD276_HUMAN	0.661116	0.112171	0.419542	-0.0929497	0.430565	0.205121	Scaling	Anti-Scaling	Buffering	Buffering
1253	CD2AP	CD2AP	0.306255	0.17045	0.0426402	-0.221011	0.0378592	0.391461	sp.Q9Y5K6.CD2AP_HUMAN	0.302752	0.156588	0.0423969	-0.231629	0.0261707	0.388217	Buffering	Buffering	Buffering	Buffering
1254	CD2BP2	CD2BP2	0.0206964	0.249491	4.72818e-05	-0.295508	1.69114e-05	0.544999	sp.O95400.CD2B2_HUMAN	0.00729795	0.335486	0.854525	0.0115533	0.0121575	0.323933	Buffering	Scaling	Scaling	Buffering
1255	CD320	CD320	0.931358	0.0249657	3.01139e-06	-0.583209	0.0511072	0.608175	sp.Q9NPF0.CD320_HUMAN	0.900569	0.0248147	0.0224331	-0.217185	0.240861	0.242	Buffering	Scaling	Buffering	Buffering
1256	CD33	CD33	0.961744	-0.0130176	0.000335592	-0.527729	0.0528594	0.514712	sp.P20138.CD33_HUMAN	0.352341	0.434995	0.0154306	-1.1383	0.00833129	1.57329	Buffering	Scaling	Scaling	Scaling
1257	CD36	CD36	0.158253	0.338204	0.88133	0.0423417	0.361972	0.295863	sp.P16671.CD36_HUMAN	0.289174	0.262749	0.866716	-0.0429126	0.268853	0.305662	Scaling	Buffering	Scaling	Buffering
1258	CD37	CD37	0.586209	-0.127442	0.00982984	-0.530751	0.0981915	0.403309	sp.P11049.CD37_HUMAN	0.34174	-0.609762	0.0296351	-1.88327	0.190947	1.27351	Anti-Scaling	Scaling	Anti-Scaling	Scaling
1259	CD38	CD38	0.459152	-0.227108	0.0350315	-0.286084	0.842803	0.0589755	sp.P28907.CD38_HUMAN	0.214223	-0.447469	0.157962	-0.233248	0.544255	-0.214222	Anti-Scaling	Scaling	Anti-Scaling	Buffering
1260	CD3EAP	CD3EAP	0.000407806	0.390424	0.0819962	-0.170527	1.79035e-05	0.560951	sp.O15446.2.RPA34_HUMAN	0.0119725	0.205035	0.0214557	-0.196454	8.78246e-05	0.401489	Scaling	Buffering	Buffering	Buffering
1261	CD40	CD40	0.0971478	0.383484	0.0520702	-0.755994	0.00668928	1.13948	sp.P25942.TNR5_HUMAN	0.247619	0.317691	0.18989	-0.755831	0.0730249	1.07352	Scaling	Scaling	Scaling	Scaling
1262	CD44	CD44	0.158741	0.646527	0.687739	0.131267	0.300228	0.51526	sp.P16070.CD44_HUMAN	0.11018	0.389392	0.941002	-0.0142343	0.14014	0.403626	Scaling	Anti-Scaling	Scaling	Buffering
1263	CD46	CD46	0.0123982	0.244913	0.0122091	-0.390159	0.000202152	0.635072	sp.P15529.MCP_HUMAN	0.425203	-0.132837	0.46759	0.139466	0.220962	-0.272302	Buffering	Scaling	Anti-Scaling	Anti-Scaling
1264	CD46	CD46	0.0123982	0.244913	0.0122091	-0.390159	0.000202152	0.635072	sp.P15529.2.MCP_HUMAN	0.511052	0.0718289	0.684681	0.0600325	0.941275	0.0117964	Buffering	Scaling	Buffering	Buffering
1265	CD47	CD47	0.000169896	0.567565	0.403904	-0.123992	0.000244539	0.691556	sp.Q08722.CD47_HUMAN	2.43199e-05	0.577876	0.883241	-0.0216837	0.00106581	0.59956	Scaling	Buffering	Scaling	Buffering
1266	CD48	CD48	0.467709	0.163517	1.68758e-05	-0.451462	0.00330437	0.614979	sp.P09326.CD48_HUMAN	0.0701393	1.50318	0.12702	-0.824747	0.0109132	2.32792	Buffering	Scaling	Scaling	Scaling
1267	CD53	CD53	0.134595	-0.387355	0.104517	-0.356347	0.910721	-0.0310077	sp.P19397.CD53_HUMAN	0.110528	-1.52351	0.392247	0.475921	0.0545477	-1.99943	Anti-Scaling	Scaling	Anti-Scaling	Anti-Scaling
1268	CD55	CD55	0.404264	-0.198912	0.986218	-0.00411712	0.51524	-0.194795	sp.P08174.7.DAF_HUMAN	0.47002	-0.115729	0.633237	0.0961687	0.363896	-0.211898	Anti-Scaling	Buffering	Anti-Scaling	Buffering
1269	CD58	CD58	0.0989083	0.270447	0.867693	-0.0206977	0.113433	0.291144	sp.P19256.LFA3_HUMAN	0.0062655	0.372466	0.611701	0.0584469	0.0467781	0.314019	Scaling	Buffering	Scaling	Buffering
1270	CD59	CD59	9.90361e-05	0.957528	0.680049	0.0798195	0.000947367	0.877708	sp.P13987.CD59_HUMAN	4.43854e-05	0.840214	0.0403113	0.288361	0.00920358	0.551853	Scaling	Buffering	Scaling	Anti-Scaling
1271	CD63	CD63	0.0265762	0.297842	0.416273	0.108507	0.257725	0.189334	sp.P08962.CD63_HUMAN	0.381678	0.151053	0.130552	0.20619	0.781879	-0.055137	Scaling	Anti-Scaling	Buffering	Anti-Scaling
1272	CD70	CD70	0.214595	0.825079	0.0414116	-0.537939	0.0470006	1.36302	sp.P32970.CD70_HUMAN	0.200379	0.660028	0.0484458	-0.607801	0.0248064	1.26783	Scaling	Scaling	Scaling	Scaling
1273	CD74	CD74	0.970482	-0.0214505	0.368416	-0.342875	0.606373	0.321425	sp.P04233.HG2A_HUMAN	0.665295	0.136314	0.127844	-0.326813	0.188539	0.463127	Buffering	Scaling	Buffering	Scaling
1274	CD79A	CD79A	0.0189595	-0.445812	0.120844	-0.341426	0.609285	-0.104387	sp.P11912.CD79A_HUMAN	0.0120364	-1.21726	0.514887	-0.338429	0.125441	-0.878832	Anti-Scaling	Scaling	Anti-Scaling	Scaling
1275	CD79B	CD79B	0.0478452	-0.411709	0.271908	-0.282768	0.649925	-0.128941	sp.P40259.3.CD79B_HUMAN	0.45847	-0.481815	0.400618	0.343225	0.228767	-0.82504	Anti-Scaling	Scaling	Anti-Scaling	Anti-Scaling
1276	CD81	CD81	0.403717	-0.198705	0.000564455	-0.455034	0.298809	0.25633	sp.P60033.CD81_HUMAN	0.568836	-0.0819241	0.00643151	-0.32465	0.104018	0.242726	Anti-Scaling	Scaling	Buffering	Scaling
1277	CD82	CD82	0.264885	0.433171	0.570659	0.133672	0.47217	0.299499	sp.P27701.CD82_HUMAN	0.54707	0.169356	0.166724	0.257897	0.771306	-0.0885414	Scaling	Anti-Scaling	Buffering	Anti-Scaling
1278	CD84	CD84	0.916259	-0.0126411	1.50247e-05	-0.270539	0.014411	0.257898	sp.Q9UIB8.SLAF5_HUMAN	0.889234	-0.0930775	0.0446943	-1.85079	0.0911529	1.75772	Buffering	Scaling	Buffering	Scaling
1279	CD9	CD9	0.446863	0.254979	0.816528	-0.0701663	0.394389	0.325145	sp.P21926.CD9_HUMAN	0.469171	0.152778	0.504987	-0.128362	0.232785	0.281139	Scaling	Buffering	Buffering	Buffering
1280	CD93	CD93	0.997182	-0.000509864	0.0752359	-0.17611	0.204072	0.1756	sp.Q9NPY3.C1QR1_HUMAN	0.598389	0.168065	0.338195	-0.231251	0.216883	0.399316	Buffering	Buffering	Buffering	Buffering
1281	CDA	CDA	0.0387534	-0.888875	0.131481	0.448807	0.00568434	-1.33768	sp.P32320.CDD_HUMAN	0.0592923	-0.643211	0.193129	0.386951	0.0116495	-1.03016	Anti-Scaling	Anti-Scaling	Anti-Scaling	Anti-Scaling
1282	CDAN1	CDAN1	0.741817	0.0448798	1.93287e-09	-0.386962	0.00457426	0.431842	sp.Q8IWY9.CDAN1_HUMAN	0.727476	-0.0585888	0.00270377	-0.24373	0.28965	0.185142	Buffering	Scaling	Buffering	Buffering
1283	CDC123	CDC123	2.81659e-05	0.42478	2.16236e-18	-0.533666	7.7657e-14	0.958446	sp.O75794.CD123_HUMAN	0.00629683	0.337676	6.20924e-06	-0.347869	9.27843e-07	0.685544	Scaling	Scaling	Scaling	Scaling
1284	CDC16	CDC16	7.22147e-06	0.476013	7.51205e-06	-0.336206	2.86461e-11	0.81222	sp.Q13042.CDC16_HUMAN	0.0903311	0.160769	0.0825737	-0.0928021	0.0103586	0.253571	Scaling	Scaling	Buffering	Buffering
1285	CDC20	CDC20	0.000686762	0.552247	0.00281808	-0.305328	3.16303e-06	0.857575	sp.Q12834.CDC20_HUMAN	0.0551773	0.280584	0.0380051	-0.19097	0.00283349	0.471553	Scaling	Scaling	Scaling	Buffering
1286	CDC23	CDC23	0.0032392	0.246058	1.49402e-06	-0.29618	6.52768e-08	0.542238	sp.Q9UJX2.CDC23_HUMAN	0.0982491	0.129717	0.914874	-0.00585777	0.113596	0.135574	Buffering	Scaling	Buffering	Buffering
1287	CDC25B	CDC25B	1.97655e-07	0.541839	3.82573e-06	-0.477541	7.41267e-16	1.01938	sp.P30305.MPIP2_HUMAN	0.00399901	0.39673	0.058712	-0.250182	5.76112e-05	0.646912	Scaling	Scaling	Scaling	Scaling
1288	CDC25C	CDC25C	0.146077	0.189015	3.4028e-06	-0.388289	0.000120669	0.577304	sp.P30307.MPIP3_HUMAN	0.318507	0.184349	0.00315746	-0.257913	0.0241573	0.442262	Buffering	Scaling	Buffering	Scaling
1289	CDC26	CDC26	0.00226276	0.225221	2.36348e-10	-0.379288	3.70186e-11	0.604509	sp.Q8NHZ8.CDC26_HUMAN	0.246374	0.107761	0.00857729	-0.175005	0.00569574	0.282766	Buffering	Scaling	Buffering	Buffering
1290	CDC27	CDC27	0.000639249	0.303767	0.00872087	-0.25515	5.23149e-06	0.558916	sp.P30260.2.CDC27_HUMAN	0.424572	0.0439443	0.254646	-0.0792723	0.131087	0.123217	Scaling	Scaling	Buffering	Buffering
1291	CDC34	CDC34	0.517215	0.084899	8.66132e-05	-0.236845	0.0220182	0.321744	sp.P49427.UB2R1_HUMAN	0.631575	0.103347	0.00019269	-0.308839	0.0692934	0.412186	Buffering	Buffering	Buffering	Scaling
1292	CDC37	CDC37	0.204867	0.110819	2.46253e-08	-0.322457	3.52743e-05	0.433277	sp.Q16543.CDC37_HUMAN	0.79098	0.0439653	3.85508e-07	-0.316757	0.0412918	0.360722	Buffering	Scaling	Buffering	Scaling
1293	CDC37L1	CDC37L1	0.00287139	0.411035	2.49921e-15	-0.538722	7.58689e-09	0.949757	sp.Q7L3B6.CD37L_HUMAN	0.259245	0.161411	2.04927e-10	-0.498767	3.74987e-05	0.660178	Scaling	Scaling	Buffering	Scaling
1294	CDC40	CDC40	0.00751871	0.305528	1.73285e-18	-0.53682	1.39733e-08	0.842348	sp.O60508.PRP17_HUMAN	0.0343594	0.238271	2.23072e-07	-0.256013	9.71326e-05	0.494283	Scaling	Scaling	Buffering	Scaling
1295	CDC42	CDC42	0.000154475	0.371766	2.60276e-05	-0.258856	2.47487e-08	0.630623	sp.P60953.CDC42_HUMAN	0.438949	-0.0678554	0.175204	0.0746469	0.114571	-0.142502	Scaling	Scaling	Buffering	Buffering
1296	CDC42	CDC42	0.000154475	0.371766	2.60276e-05	-0.258856	2.47487e-08	0.630623	sp.P60953.1.CDC42_HUMAN	0.885547	-0.00948974	0.813642	0.0109931	0.779354	-0.0204828	Scaling	Scaling	Buffering	Buffering
1297	CDC42BPA	CDC42BPA	0.238775	0.186558	0.702563	-0.0496557	0.183184	0.236214	sp.Q5VT25.2.MRCKA_HUMAN	0.167276	0.134721	0.84219	0.0180779	0.307419	0.116644	Buffering	Buffering	Buffering	Buffering
1298	CDC42BPB	CDC42BPB	0.0013174	0.514134	0.0209164	-0.276142	2.91684e-06	0.790276	sp.Q9Y5S2.MRCKB_HUMAN	0.000756084	0.383272	0.945514	-0.00584589	0.00130123	0.389118	Scaling	Scaling	Scaling	Buffering
1299	CDC42BPG	CDC42BPG	0.17693	0.313371	0.701185	-0.0789739	0.147253	0.392345	sp.Q6DT37.MRCKG_HUMAN	0.867902	0.0315291	0.801789	0.0377561	0.976471	-0.00622705	Scaling	Buffering	Buffering	Buffering
1300	CDC42EP1	CDC42EP1	0.560829	0.29324	0.761155	0.0587966	0.640149	0.234444	sp.Q00587.BORG5_HUMAN	0.322724	0.267261	0.694424	-0.04694	0.243096	0.314201	Scaling	Buffering	Scaling	Buffering
1301	CDC42EP2	CDC42EP2	0.00120594	0.620533	0.714147	-0.0484471	0.00118275	0.66898	sp.O14613.BORG1_HUMAN	0.184654	0.289766	0.350555	-0.133854	0.069749	0.42362	Scaling	Buffering	Scaling	Buffering
1302	CDC42EP3	CDC42EP3	0.0867444	0.416528	0.96174	0.0135242	0.235738	0.403004	sp.Q9UKI2.BORG2_HUMAN	0.0958358	0.384542	0.798514	0.0516683	0.238461	0.332874	Scaling	Buffering	Scaling	Buffering
1303	CDC42EP4	CDC42EP4	0.0124637	0.422474	0.817484	-0.0446548	0.0455838	0.467129	sp.Q9H3Q1.BORG4_HUMAN	0.00350872	0.374878	0.700145	0.0649981	0.110127	0.30988	Scaling	Buffering	Scaling	Buffering
1304	CDC42EP5	CDC42EP5	0.697036	0.11646	0.496836	-0.140267	0.430268	0.256727	sp.Q6NZY7.BORG3_HUMAN	0.31316	-0.390712	0.307259	-0.302013	0.835471	-0.0886984	Buffering	Buffering	Anti-Scaling	Scaling
1305	CDC42SE1	CDC42SE1	0.00342496	0.264462	1.18985e-05	-0.571998	2.10493e-08	0.83646	sp.Q9NRR8.C42S1_HUMAN	0.107785	0.179005	0.0393604	-0.31087	0.00391815	0.489875	Scaling	Scaling	Buffering	Scaling
1306	CDC42SE2	CDC42SE2	0.122401	0.14877	2.11607e-09	-0.548774	2.51886e-08	0.697544	sp.Q9NRR3.C42S2_HUMAN	0.188892	0.208255	0.00962398	-0.289533	0.00565279	0.497787	Buffering	Scaling	Buffering	Scaling
1307	CDC45	CDC45	0.00159697	0.569252	0.000986274	-0.295014	1.58964e-05	0.864266	sp.O75419.3.CDC45_HUMAN	0.885597	-0.0285355	0.0831587	-0.156595	0.534067	0.128059	Scaling	Scaling	Buffering	Buffering
1308	CDC5L	CDC5L	2.29857e-05	0.369103	0.000129143	-0.256264	2.12543e-09	0.625366	sp.Q99459.CDC5L_HUMAN	0.346504	0.0662601	0.0742673	-0.108626	0.0401735	0.174886	Scaling	Scaling	Buffering	Buffering
1309	CDC6	CDC6	0.169375	0.158644	0.370425	-0.129176	0.0894902	0.28782	sp.Q99741.CDC6_HUMAN	0.675881	-0.088816	0.388433	-0.256453	0.622469	0.167637	Buffering	Buffering	Buffering	Scaling
1310	CDC7	CDC7	0.00356625	0.408827	6.21204e-06	-0.438516	2.93291e-07	0.847342	sp.O00311.CDC7_HUMAN	0.000472585	0.560279	0.19204	-0.223624	0.000357601	0.783902	Scaling	Scaling	Scaling	Buffering
1311	CDC73	CDC73	0.000109674	0.259523	0.00436778	-0.317051	3.73658e-06	0.576573	sp.Q6P1J9.CDC73_HUMAN	0.323461	0.0537674	0.872345	0.0125235	0.630342	0.0412439	Scaling	Scaling	Buffering	Buffering
1312	CDCA2	CDCA2	0.0519368	0.264333	1.18714e-11	-0.537491	3.0488e-07	0.801824	sp.Q69YH5.CDCA2_HUMAN	0.10577	0.283406	0.000565131	-0.326245	0.000829766	0.609651	Scaling	Scaling	Scaling	Scaling
1313	CDCA3	CDCA3	4.68906e-06	0.438621	0.00151116	-0.33016	1.66903e-09	0.76878	sp.Q99618.CDCA3_HUMAN	0.0087983	0.321973	0.00665313	-0.325686	1.42468e-05	0.647659	Scaling	Scaling	Scaling	Scaling
1314	CDCA4	CDCA4	0.02394	0.235158	1.08827e-07	-0.467697	2.59823e-08	0.702855	sp.Q9BXL8.CDCA4_HUMAN	0.89266	0.0252304	0.0879859	-0.244223	0.186398	0.269454	Buffering	Scaling	Buffering	Buffering
1315	CDCA5	CDCA5	0.623785	0.0490264	0.13186	-0.14762	0.115771	0.196647	sp.Q96FF9.CDCA5_HUMAN	0.227287	0.143677	0.587039	0.0586755	0.514508	0.0850018	Buffering	Buffering	Buffering	Buffering
1316	CDCA7	CDCA7	0.590995	-0.120699	0.000238917	-0.579874	0.0730434	0.459175	sp.Q9BWT1.CDCA7_HUMAN	0.412565	0.150986	0.885776	-0.0188957	0.398469	0.169882	Anti-Scaling	Scaling	Buffering	Buffering
1317	CDCA7L	CDCA7L	0.00250417	0.505833	0.940776	-0.0188914	0.0378439	0.524724	sp.Q96GN5.CDA7L_HUMAN	0.0105783	0.282898	0.289947	0.165725	0.462059	0.117173	Scaling	Buffering	Scaling	Anti-Scaling
1318	CDCA8	CDCA8	0.00475107	0.409142	0.000294723	-0.310696	1.18055e-05	0.719838	sp.Q53HL2.BOREA_HUMAN	0.0104979	0.29504	0.841193	0.0173306	0.0307032	0.277709	Scaling	Scaling	Scaling	Buffering
1319	CDCP1	CDCP1	0.906886	0.0793472	0.000386967	0.825302	0.277645	-0.745955	sp.Q9H5V8.CDCP1_HUMAN	0.302638	-0.444992	0.0167226	0.36728	0.0691164	-0.812272	Buffering	Anti-Scaling	Anti-Scaling	Anti-Scaling
1320	CDH1	CDH1	0.205993	0.762333	0.837134	0.0727553	0.278715	0.689578	sp.P12830.CADH1_HUMAN	0.971324	0.0127556	0.714933	-0.0749472	0.812077	0.0877027	Scaling	Buffering	Buffering	Buffering
1321	CDH11	CDH11	0.605277	0.205795	0.728562	-0.0797189	0.49743	0.285514	sp.P55287.CAD11_HUMAN	0.690815	0.183905	0.441941	-0.250235	0.396164	0.43414	Buffering	Buffering	Buffering	Scaling
1322	CDH13	CDH13	0.607963	-0.16203	0.340678	0.242166	0.261286	-0.404195	sp.P55290.4.CAD13_HUMAN	0.353793	-0.249459	0.190476	0.341701	0.0619266	-0.591161	Anti-Scaling	Anti-Scaling	Anti-Scaling	Anti-Scaling
1323	CDH17	CDH17	0.662455	0.108174	0.46856	-0.207799	0.336227	0.315973	sp.Q12864.CAD17_HUMAN	0.722185	0.101286	0.946854	0.0268422	0.865461	0.0744439	Buffering	Buffering	Buffering	Buffering
1324	CDH2	CDH2	0.116815	1.13466	0.321788	-0.268066	0.0532143	1.40273	sp.P19022.CADH2_HUMAN	0.15692	0.763178	0.60843	0.0946519	0.210303	0.668526	Scaling	Scaling	Scaling	Buffering
1325	CDH3	CDH3	0.0986226	0.981995	0.656839	0.149214	0.18558	0.832781	sp.P22223.CADH3_HUMAN	0.549625	0.193275	0.754464	-0.0590438	0.457444	0.252319	Scaling	Anti-Scaling	Buffering	Buffering
1326	CDH4	CDH4	0.0729766	0.229696	0.830326	-0.0474678	0.243122	0.277164	sp.P55283.CADH4_HUMAN	0.0995668	0.444411	0.830307	-0.117474	0.321299	0.561885	Buffering	Buffering	Scaling	Buffering
1327	CDH5	CDH5	0.377164	0.262412	0.682405	-0.0464252	0.305866	0.308838	sp.P33151.CADH5_HUMAN	0.408129	0.555065	0.305392	-0.317265	0.20889	0.872329	Scaling	Buffering	Scaling	Scaling
1328	CDH6	CDH6	0.903176	-0.0256351	0.500708	-0.245424	0.55875	0.219789	sp.P55285.CADH6_HUMAN	0.755186	-0.0907118	0.218564	-0.424651	0.374979	0.333939	Buffering	Buffering	Buffering	Scaling
1329	CDIP1	CDIP1	0.00700895	0.870151	0.398618	-0.14466	0.00275687	1.01481	sp.Q9H305.CDIP1_HUMAN	0.167051	0.755508	0.960621	-0.0121575	0.154986	0.767665	Scaling	Buffering	Scaling	Buffering
1330	CDIPT	CDIPT	0.00450379	0.336611	0.000184821	-0.245478	1.17587e-05	0.582089	sp.O14735.CDIPT_HUMAN	0.0477398	0.238031	0.00642732	-0.200503	0.000891571	0.438535	Scaling	Buffering	Buffering	Buffering
1331	CDK1	CDK1	0.00629331	0.35925	0.0109141	-0.218813	0.000100907	0.578063	sp.P06493.CDK1_HUMAN	0.195529	0.254993	0.649482	-0.0375052	0.151949	0.292498	Scaling	Buffering	Scaling	Buffering
1332	CDK10	CDK10	0.139493	0.235772	5.44711e-06	-0.381796	0.000533632	0.617568	sp.Q15131.CDK10_HUMAN	0.175131	0.164021	0.853481	0.0136402	0.243469	0.150381	Buffering	Scaling	Buffering	Buffering
1333	CDK11A	CDK11A	0.022819	0.282676	0.0189777	-0.198795	0.000613009	0.481472	sp.Q9UQ88.CD11A_HUMAN	0.000505071	0.231939	0.273786	0.0609084	0.0262867	0.17103	Scaling	Buffering	Buffering	Buffering
1334	CDK11B	CDK11B	0.00880967	0.297644	0.01616	-0.156537	0.000309792	0.454182	sp.P21127.2.CD11B_HUMAN	0.00669661	0.244476	0.254483	0.0703789	0.0775072	0.174097	Scaling	Buffering	Buffering	Buffering
1335	CDK12	CDK12	0.0733551	0.174031	0.479107	-0.101938	0.0936652	0.275969	sp.Q9NYV4.CDK12_HUMAN	0.313012	-0.0685267	0.914998	0.0101588	0.47396	-0.0786855	Buffering	Buffering	Buffering	Buffering
1336	CDK13	CDK13	1.62864e-10	0.375413	4.7541e-05	-0.344275	5.66149e-13	0.719688	sp.Q14004.CDK13_HUMAN	8.11726e-05	0.150071	0.00231953	-0.176754	2.28767e-07	0.326825	Scaling	Scaling	Buffering	Buffering
1337	CDK14	CDK14	0.0218498	0.425646	0.992031	0.00194854	0.0620855	0.423697	sp.O94921.CDK14_HUMAN	0.866854	0.0379172	0.0911793	-0.473833	0.0789705	0.51175	Scaling	Buffering	Buffering	Scaling
1338	CDK17	CDK17	0.612621	0.0775249	2.72976e-05	-0.411157	0.00491539	0.488682	sp.Q00537.CDK17_HUMAN	0.376199	0.119303	1.33277e-05	-0.374862	0.00131485	0.494165	Buffering	Scaling	Buffering	Scaling
1339	CDK18	CDK18	0.599237	0.0903489	0.000468823	-0.871158	0.000436723	0.961507	sp.Q07002.3.CDK18_HUMAN	0.610046	0.0832063	0.00712054	-0.770042	0.00414543	0.853248	Buffering	Scaling	Buffering	Scaling
1340	CDK19	CDK19	0.0123832	0.323556	1.5492e-13	-0.62057	8.83491e-09	0.944126	sp.Q9BWU1.CDK19_HUMAN	0.065135	0.182522	0.0214384	-0.118287	0.00417529	0.300809	Scaling	Scaling	Buffering	Buffering
1341	CDK2	CDK2	0.490946	0.120248	0.74976	0.0460526	0.727733	0.0741954	sp.P24941.CDK2_HUMAN	0.447761	-0.104305	0.551521	-0.0681094	0.826563	-0.036196	Buffering	Buffering	Anti-Scaling	Buffering
1342	CDK2AP1	CDK2AP1	0.595638	-0.0836908	0.730202	-0.0457793	0.839002	-0.0379115	sp.O14519.CDKA1_HUMAN	0.878606	-0.0212751	0.970998	-0.00327701	0.907162	-0.0179981	Buffering	Buffering	Buffering	Buffering
1343	CDK3	CDK3	0.00432054	0.291428	0.228729	-0.126185	0.0020424	0.417613	sp.Q00526.CDK3_HUMAN	0.200426	-0.151137	0.984589	0.00236454	0.314773	-0.153501	Scaling	Buffering	Anti-Scaling	Buffering
1344	CDK4	CDK4	0.648314	0.06257	0.324306	-0.13314	0.275509	0.19571	sp.P11802.CDK4_HUMAN	0.716819	0.0555487	0.844636	-0.0270915	0.665364	0.0826402	Buffering	Buffering	Buffering	Buffering
1345	CDK5	CDK5	7.8772e-15	0.633818	0.00153135	-0.414902	1.20634e-11	1.04872	sp.Q00535.CDK5_HUMAN	1.00341e-10	0.429664	9.88324e-05	-0.334972	3.2542e-14	0.764636	Scaling	Scaling	Scaling	Scaling
1346	CDK5RAP1	CDK5RAP1	9.3309e-13	0.361234	0.621799	0.0634642	0.0295765	0.29777	sp.Q96SZ6.CK5P1_HUMAN	1.27846e-05	0.258832	0.734196	-0.0397692	0.0173157	0.298601	Scaling	Buffering	Scaling	Buffering
1347	CDK5RAP2	CDK5RAP2	0.0773364	0.201181	2.2004e-07	-0.402428	3.88724e-06	0.603608	sp.Q96SN8.CK5P2_HUMAN	0.00459363	0.217116	0.269487	-0.0558586	0.000840499	0.272975	Buffering	Scaling	Buffering	Buffering
1348	CDK5RAP3	CDK5RAP3	0.0778918	0.133911	0.00198492	-0.293418	9.23436e-05	0.427329	tr.F5H3I5.F5H3I5_HUMAN	0.116424	-0.106789	0.070355	-0.14598	0.678785	0.0391912	Buffering	Scaling	Anti-Scaling	Buffering
1349	CDK6	CDK6	0.00469034	0.448731	0.856841	0.0380398	0.0576729	0.410692	sp.Q00534.CDK6_HUMAN	0.0536399	0.2505	0.398988	-0.140326	0.0229964	0.390826	Scaling	Buffering	Scaling	Buffering
1350	CDK7	CDK7	1.40604e-06	0.515739	1.66422e-07	-0.317435	8.57761e-12	0.833174	sp.P50613.CDK7_HUMAN	0.267663	0.0934731	0.171367	-0.0905738	0.0546542	0.184047	Scaling	Scaling	Buffering	Buffering
1351	CDK8	CDK8	0.00215044	0.409708	2.18616e-06	-0.289677	1.97643e-06	0.699385	sp.P49336.CDK8_HUMAN	0.0145724	0.357064	0.225453	-0.088115	0.00263506	0.445179	Scaling	Scaling	Scaling	Buffering
1352	CDK9	CDK9	0.0282349	0.201109	1.28016e-13	-0.484771	4.34395e-10	0.68588	sp.P50750.2.CDK9_HUMAN	0.90281	0.00732467	0.125934	-0.0727433	0.219019	0.080068	Buffering	Scaling	Buffering	Buffering
1353	CDKAL1	CDKAL1	0.0451306	0.206589	5.54001e-08	-0.452948	5.71683e-08	0.659536	sp.Q5VV42.CDKAL_HUMAN	0.0289752	0.220406	0.00478933	-0.23592	0.000154631	0.456326	Buffering	Scaling	Buffering	Buffering
1354	CDKN1A	CDKN1A	0.986404	-0.00482118	0.258534	0.244984	0.430489	-0.249805	sp.P38936.CDN1A_HUMAN	0.197036	-0.387875	0.984158	0.0047227	0.258675	-0.392597	Buffering	Anti-Scaling	Anti-Scaling	Buffering
1355	CDKN1B	CDKN1B	0.000826445	0.348844	0.00161597	-0.31617	4.00927e-07	0.665014	sp.P46527.CDN1B_HUMAN	7.50888e-05	0.595446	0.503957	-0.0908219	7.50289e-05	0.686268	Scaling	Scaling	Scaling	Buffering
1356	CDKN2A	CDKN2A	0.549296	0.410283	0.651685	-0.150465	0.41267	0.560749	sp.Q8N726.CD2A2_HUMAN	0.18905	0.539494	0.25366	0.231923	0.454488	0.307571	Scaling	Buffering	Scaling	Anti-Scaling
1357	CDKN2A	CDKN2A	0.549296	0.410283	0.651685	-0.150465	0.41267	0.560749	sp.P42771.CD2A1_HUMAN	0.154415	0.583341	0.215872	-0.245972	0.041195	0.829313	Scaling	Buffering	Scaling	Buffering
1358	CDKN2AIP	CDKN2AIP	0.0590839	0.353538	0.00119515	-0.238306	0.00429327	0.591845	sp.Q9NXV6.CARF_HUMAN	0.00229262	0.575556	0.0280288	-0.125022	0.000500667	0.700578	Scaling	Buffering	Scaling	Buffering
1359	CDKN2AIPNL	CDKN2AIPNL	0.00463209	0.33043	5.9244e-09	-0.490505	7.76571e-09	0.820935	sp.Q96HQ2.C2AIL_HUMAN	0.359862	-0.126616	0.112581	-0.161527	0.823259	0.0349106	Scaling	Scaling	Anti-Scaling	Buffering
1360	CDKN2C	CDKN2C	0.0865008	0.501001	0.000285964	-0.670909	0.000381893	1.17191	sp.P42773.CDN2C_HUMAN	0.811796	-0.0531862	0.0020547	-0.512856	0.067045	0.45967	Scaling	Scaling	Buffering	Scaling
1361	CDKN3	CDKN3	0.000373872	0.452616	0.00568267	-0.270442	6.15617e-07	0.723059	sp.Q16667.CDKN3_HUMAN	0.0514285	-0.364454	0.038268	-0.289634	0.687133	-0.0748203	Scaling	Scaling	Anti-Scaling	Scaling
1362	CDPF1	CDPF1	0.000123444	0.470516	1.31255e-14	-0.522242	2.00102e-10	0.992758	sp.Q6NVV7.CDPF1_HUMAN	0.18987	0.286363	0.0028929	-0.232096	0.0273976	0.518459	Scaling	Scaling	Scaling	Buffering
1363	CDR2	CDR2	5.80657e-05	0.527216	6.76964e-07	-0.376586	2.17569e-09	0.903801	sp.Q01850.CDR2_HUMAN	0.00125585	0.455795	1.65763e-05	-0.344125	6.09117e-07	0.79992	Scaling	Scaling	Scaling	Scaling
1364	CDR2L	CDR2L	0.0274682	0.400816	0.1416	0.276035	0.584892	0.124781	sp.Q86X02.CDR2L_HUMAN	0.0140278	0.309823	0.230645	0.155477	0.326716	0.154346	Scaling	Anti-Scaling	Scaling	Anti-Scaling
1365	CDS2	CDS2	2.12295e-10	0.555826	1.65593e-06	-0.380767	1.62377e-18	0.936594	sp.O95674.CDS2_HUMAN	2.3791e-07	0.46552	0.00346863	-0.266813	4.33147e-12	0.732333	Scaling	Scaling	Scaling	Scaling
1366	CDT1	CDT1	0.0162771	0.24737	0.000493674	-0.344373	3.74005e-06	0.591743	sp.Q9H211.CDT1_HUMAN	0.501507	0.101854	0.0547329	-0.210515	0.0674902	0.312369	Buffering	Scaling	Buffering	Buffering
1367	CDV3	CDV3	0.000206645	0.318429	0.115174	-0.186773	0.000341553	0.505201	sp.Q9UKY7.CDV3_HUMAN	0.912372	0.013289	0.0692942	-0.300493	0.0853483	0.313782	Scaling	Buffering	Buffering	Scaling
1368	CDX2	CDX2	0.00644777	1.43548	0.14323	-0.24638	0.00167277	1.68186	sp.Q99626.CDX2_HUMAN	0.244145	0.928313	0.432407	-0.288618	0.131461	1.21693	Scaling	Buffering	Scaling	Scaling
1369	CDYL	CDYL	0.000741625	0.267128	0.00590791	-0.218152	1.23815e-06	0.48528	sp.Q9Y232.CDYL1_HUMAN	0.116395	0.135858	0.0180456	-0.210859	0.00182597	0.346718	Scaling	Buffering	Buffering	Buffering
1370	CDYL2	CDYL2	0.364866	0.215779	0.235504	-0.155485	0.137586	0.371263	sp.Q8N8U2.CDYL2_HUMAN	0.709504	-0.133527	0.441207	-0.217135	0.818362	0.083607	Buffering	Buffering	Anti-Scaling	Buffering
1371	CEACAM1	CEACAM1	0.424862	-0.197915	0.500224	-0.144175	0.849	-0.0537398	sp.P13688.CEAM1_HUMAN	0.37245	-0.231168	0.82561	0.0550279	0.354697	-0.286196	Anti-Scaling	Buffering	Anti-Scaling	Buffering
1372	CEACAM5	CEACAM5	0.484671	-0.18995	0.233082	0.360838	0.111554	-0.550787	sp.P06731.CEAM5_HUMAN	0.748542	-0.0880567	0.640482	0.138606	0.497034	-0.226663	Anti-Scaling	Anti-Scaling	Buffering	Anti-Scaling
1373	CEACAM6	CEACAM6	0.0995857	0.716495	0.166669	0.44664	0.579961	0.269856	sp.P40199.CEAM6_HUMAN	0.119183	0.712251	0.105311	0.641748	0.892601	0.0705024	Scaling	Anti-Scaling	Scaling	Anti-Scaling
1374	CEACAM7	CEACAM7	0.53951	0.0565199	0.288768	-0.0397567	0.296071	0.0962766	sp.Q14002.CEAM7_HUMAN	0.489457	0.529568	0.43682	0.573356	0.962122	-0.043788	Buffering	Buffering	Scaling	Anti-Scaling
1375	CEBPA	CEBPA	0.0810209	0.476883	0.0554448	-0.337007	0.00371164	0.81389	sp.P49715.CEBPA_HUMAN	0.00306209	1.00327	0.224122	-0.294918	0.000273115	1.29819	Scaling	Scaling	Scaling	Scaling
1376	CEBPB	CEBPB	6.80749e-06	0.515778	0.157948	0.352484	0.51202	0.163294	sp.P17676.CEBPB_HUMAN	4.63017e-06	0.438502	0.0502556	0.314249	0.436323	0.124253	Scaling	Anti-Scaling	Scaling	Anti-Scaling
1377	CEBPD	CEBPD	2.27326e-05	0.643887	0.966082	-0.00823506	0.00302398	0.652123	sp.P49716.CEBPD_HUMAN	0.109068	0.260657	0.109483	0.392423	0.608077	-0.131766	Scaling	Buffering	Scaling	Anti-Scaling
1378	CEBPG	CEBPG	0.00671042	0.273956	0.0481992	-0.214628	0.000237157	0.488585	sp.P53567.CEBPG_HUMAN	0.0473196	0.333443	0.0351769	-0.270171	0.000947521	0.603615	Scaling	Buffering	Scaling	Scaling
1379	CEBPZ	CEBPZ	0.00299931	0.191303	0.00177204	-0.25914	3.86895e-06	0.450443	sp.Q03701.CEBPZ_HUMAN	0.0096503	0.208918	0.0312878	-0.165603	0.0002855	0.374521	Buffering	Scaling	Buffering	Buffering
1380	CELF1	CELF1	0.038394	0.174442	0.010933	-0.149689	0.000628257	0.324132	tr.G5EA30.G5EA30_HUMAN	0.0066526	0.236127	0.96019	-0.00319317	0.0133958	0.23932	Buffering	Buffering	Buffering	Buffering
1381	CELF2	CELF2	0.501737	-0.237548	0.327557	0.205107	0.227471	-0.442655	sp.O95319.CELF2_HUMAN	0.68927	-0.0785803	0.948662	0.00649772	0.666427	-0.085078	Anti-Scaling	Anti-Scaling	Buffering	Buffering
1382	CELF2	CELF2	0.501737	-0.237548	0.327557	0.205107	0.227471	-0.442655	tr.E9PC62.E9PC62_HUMAN	0.371197	-0.360854	0.892553	0.0504029	0.365282	-0.411257	Anti-Scaling	Anti-Scaling	Anti-Scaling	Buffering
1383	CELSR1	CELSR1	0.704289	0.150376	0.976562	0.00517649	0.714751	0.145199	sp.Q9NYQ6.CELR1_HUMAN	0.777179	-0.0805926	0.613884	-0.0615625	0.946903	-0.01903	Buffering	Buffering	Buffering	Buffering
1384	CELSR2	CELSR2	0.366383	0.264552	0.921257	0.0175929	0.440415	0.246959	sp.Q9HCU4.CELR2_HUMAN	0.19022	0.291984	0.586229	-0.0824075	0.13361	0.374392	Scaling	Buffering	Scaling	Buffering
1385	CEND1	CEND1	0.152809	-0.285616	0.00291222	-0.394278	0.591502	0.108662	sp.Q8N111.CEND_HUMAN	0.073712	-0.903161	0.0666951	-0.80458	0.859357	-0.0985811	Anti-Scaling	Scaling	Anti-Scaling	Scaling
1386	CENPB	CENPB	6.15143e-09	0.572224	3.80402e-05	-0.379068	6.54223e-17	0.951293	sp.P07199.CENPB_HUMAN	2.13417e-05	0.286082	0.0213891	-0.148969	1.50622e-08	0.435051	Scaling	Scaling	Scaling	Buffering
1387	CENPC	CENPC	0.967288	-0.00519743	1.54014e-12	-0.421546	0.00487089	0.416349	sp.Q03188.CENPC_HUMAN	0.164804	0.356745	0.248034	-0.0658372	0.104663	0.422583	Buffering	Scaling	Scaling	Buffering
1388	CENPE	CENPE	0.694675	-0.0836427	5.40724e-07	-0.380456	0.179721	0.296813	sp.Q02224.CENPE_HUMAN	0.204457	0.340663	0.287998	-0.0726381	0.129245	0.413301	Buffering	Scaling	Scaling	Buffering
1389	CENPF	CENPF	0.00252714	0.286503	0.00698724	-0.366119	2.54596e-05	0.652622	sp.P49454.CENPF_HUMAN	0.099988	0.178447	0.941666	0.00848541	0.23958	0.169962	Scaling	Scaling	Buffering	Buffering
1390	CENPH	CENPH	0.383353	0.116888	3.37021e-05	-0.377136	0.00117325	0.494024	sp.Q9H3R5.CENPH_HUMAN	0.369938	-0.107062	0.60034	-0.0350265	0.561359	-0.0720352	Buffering	Scaling	Anti-Scaling	Buffering
1391	CENPJ	CENPJ	0.00402537	0.396698	5.53794e-06	-0.354887	7.16023e-07	0.751585	sp.Q9HC77.CENPJ_HUMAN	0.0641102	0.325521	0.00806339	-0.263024	0.00197896	0.588545	Scaling	Scaling	Scaling	Scaling
1392	CENPK	CENPK	0.972907	0.00493516	0.000546954	-0.316233	0.0497925	0.321169	sp.Q9BS16.CENPK_HUMAN	0.238489	-0.130649	0.46369	0.0530687	0.124775	-0.183718	Buffering	Scaling	Anti-Scaling	Buffering
1393	CENPL	CENPL	0.00872931	0.199512	0.0009789	-0.353166	7.20138e-06	0.552678	sp.Q8N0S6.CENPL_HUMAN	0.659604	0.040323	0.0256822	0.203713	0.159438	-0.16339	Buffering	Scaling	Buffering	Anti-Scaling
1394	CENPM	CENPM	2.05762e-05	0.609821	1.56218e-05	-0.368611	3.78821e-09	0.978432	sp.Q9NSP4.CENPM_HUMAN	0.36173	0.148952	0.868138	-0.0119173	0.325546	0.160869	Scaling	Scaling	Buffering	Buffering
1395	CENPN	CENPN	0.000156843	0.52052	0.00885777	-0.263062	1.11915e-06	0.783583	sp.Q96H22.CENPN_HUMAN	0.170412	-0.145143	0.597299	0.0405497	0.105669	-0.185693	Scaling	Scaling	Anti-Scaling	Buffering
1396	CENPO	CENPO	0.0730833	0.229662	0.135766	-0.193655	0.0143707	0.423316	sp.Q9BU64.CENPO_HUMAN	0.173914	0.203098	0.710525	-0.0562167	0.19447	0.259314	Buffering	Buffering	Buffering	Buffering
1397	CENPP	CENPP	0.332204	0.120025	1.65667e-08	-0.480287	1.79983e-05	0.600311	sp.Q6IPU0.CENPP_HUMAN	0.016554	0.263327	0.99417	-0.000585094	0.019131	0.263912	Buffering	Scaling	Scaling	Buffering
1398	CENPQ	CENPQ	0.000701461	0.402907	0.0328121	-0.186468	1.82818e-05	0.589375	sp.Q7L2Z9.CENPQ_HUMAN	0.385333	0.07716	0.426947	-0.0691893	0.193307	0.146349	Scaling	Buffering	Buffering	Buffering
1399	CENPT	CENPT	0.0141319	0.283846	6.46914e-09	-0.424348	1.83845e-07	0.708193	sp.Q96BT3.CENPT_HUMAN	0.984682	0.00167812	0.792867	-0.0197403	0.829782	0.0214185	Scaling	Scaling	Buffering	Buffering
1400	CENPU	CENPU	0.339516	0.232314	0.000188568	-0.320052	0.0358533	0.552366	sp.Q71F23.CENPU_HUMAN	0.116844	0.521248	0.122384	0.0962178	0.192835	0.42503	Buffering	Scaling	Scaling	Buffering
1401	CENPV	CENPV	0.126122	0.585354	0.33994	-0.187818	0.047293	0.773172	sp.Q7Z7K6.3.CENPV_HUMAN	0.305549	0.492266	0.807728	0.0668358	0.371293	0.42543	Scaling	Buffering	Scaling	Buffering
1402	CENPV	CENPV	0.126122	0.585354	0.33994	-0.187818	0.047293	0.773172	sp.Q7Z7K6.CENPV_HUMAN	0.169217	0.347477	0.841025	0.0292192	0.213112	0.318258	Scaling	Buffering	Scaling	Buffering
1403	CEP112	CEP112	0.00192341	0.601255	0.000331852	-0.536248	4.34404e-07	1.1375	sp.Q8N8E3.CE112_HUMAN	0.00107341	0.789811	0.803953	-0.046765	0.00284809	0.836576	Scaling	Scaling	Scaling	Buffering
1404	CEP120	CEP120	0.00439602	0.262341	1.48671e-08	-0.443685	1.77941e-09	0.706026	sp.Q8N960.CE120_HUMAN	0.796148	0.0249491	0.333437	-0.0700169	0.372218	0.094966	Scaling	Scaling	Buffering	Buffering
1405	CEP128	CEP128	0.0120617	0.236347	0.0005705	-0.327069	1.5958e-06	0.563416	sp.Q6ZU80.CE128_HUMAN	0.380042	0.0951418	0.000406084	-0.358955	0.000667981	0.454097	Buffering	Scaling	Buffering	Scaling
1406	CEP135	CEP135	0.839607	-0.0311765	0.000584483	-0.249674	0.177735	0.218497	sp.Q66GS9.CP135_HUMAN	0.725549	0.068459	0.100471	-0.082311	0.444228	0.15077	Buffering	Buffering	Buffering	Buffering
1407	CEP152	CEP152	0.392627	0.135419	3.45611e-07	-0.40334	0.00253692	0.538759	sp.O94986.CE152_HUMAN	0.275286	0.132192	0.0420252	-0.131153	0.0441485	0.263345	Buffering	Scaling	Buffering	Buffering
1408	CEP164	CEP164	0.0380707	0.210065	0.00116043	-0.252996	5.9061e-05	0.463062	sp.Q9UPV0.CE164_HUMAN	0.00315258	0.317039	0.0477999	0.192365	0.230431	0.124674	Buffering	Scaling	Scaling	Anti-Scaling
1409	CEP170	CEP170	0.0792107	0.251103	0.805845	-0.0525527	0.198897	0.303656	sp.Q5SW79.2.CE170_HUMAN	0.146259	0.245725	0.923046	-0.0245291	0.327011	0.270254	Scaling	Buffering	Buffering	Buffering
1410	CEP170	CEP170	0.0792107	0.251103	0.805845	-0.0525527	0.198897	0.303656	sp.Q5SW79.CE170_HUMAN	0.0471945	0.206126	0.55784	-0.0808771	0.0649449	0.287003	Scaling	Buffering	Buffering	Buffering
1411	CEP170B	CEP170B	0.000180403	0.671263	0.275325	-0.15643	1.75302e-05	0.827693	sp.Q9Y4F5.C170B_HUMAN	0.0822181	0.202738	0.156605	-0.113244	0.0103031	0.315982	Scaling	Buffering	Buffering	Buffering
1412	CEP192	CEP192	7.24185e-09	0.497481	2.97191e-15	-0.510975	5.5774e-22	1.00846	tr.E9PF99.E9PF99_HUMAN	0.0294331	0.151147	0.000165155	-0.18955	7.72394e-06	0.340697	Scaling	Scaling	Buffering	Buffering
1413	CEP250	CEP250	7.66193e-06	0.394378	0.270944	-0.247926	0.00867991	0.642304	sp.Q9BV73.CP250_HUMAN	0.694394	0.0230982	0.883492	-0.0207222	0.757526	0.0438204	Scaling	Buffering	Buffering	Buffering
1414	CEP290	CEP290	0.0163886	0.271664	5.61997e-06	-0.437724	6.70633e-07	0.709388	sp.O15078.CE290_HUMAN	0.353454	0.0535826	0.721076	-0.0224263	0.327151	0.0760089	Scaling	Scaling	Buffering	Buffering
1415	CEP350	CEP350	0.00168699	0.246775	3.59813e-05	-0.402636	2.94985e-08	0.649412	sp.Q5VT06.CE350_HUMAN	0.00285504	0.150144	0.000532698	-0.212233	6.1634e-07	0.362377	Buffering	Scaling	Buffering	Buffering
1416	CEP41	CEP41	2.52517e-05	0.500912	0.772981	0.0359381	0.000931238	0.464974	sp.Q9BYV8.CEP41_HUMAN	4.58682e-05	0.428391	0.363007	-0.107671	3.06102e-05	0.536061	Scaling	Buffering	Scaling	Buffering
1417	CEP44	CEP44	0.273946	0.344939	1.82156e-07	-0.376046	0.0345359	0.720985	sp.Q9C0F1.CEP44_HUMAN	0.129643	0.279344	0.00827205	-0.168851	0.0224971	0.448195	Scaling	Scaling	Scaling	Buffering
1418	CEP55	CEP55	0.0783079	0.383735	0.00102813	-0.305779	0.00348736	0.689514	sp.Q53EZ4.CEP55_HUMAN	0.289818	0.235404	0.0186427	-0.19954	0.0607313	0.434944	Scaling	Scaling	Buffering	Buffering
1419	CEP57	CEP57	6.2752e-05	0.29035	2.975e-13	-0.618941	1.18794e-18	0.90929	sp.Q86XR8.CEP57_HUMAN	0.016716	0.204056	0.00215346	-0.240014	9.01156e-06	0.444071	Scaling	Scaling	Buffering	Buffering
1420	CEP63	CEP63	0.107089	0.117188	0.00146572	-0.332611	0.000140883	0.449799	sp.Q96MT8.2.CEP63_HUMAN	0.0170728	0.195566	0.0159122	-0.24981	0.00030766	0.445376	Buffering	Scaling	Buffering	Buffering
1421	CEP68	CEP68	0.00112076	0.313192	8.30899e-05	-0.348863	7.21285e-08	0.662056	sp.Q76N32.CEP68_HUMAN	0.0345189	0.328405	0.338058	-0.129918	0.0167171	0.458323	Scaling	Scaling	Scaling	Buffering
1422	CEP72	CEP72	3.76999e-08	0.463739	2.41132e-05	-0.51052	2.50972e-11	0.974259	sp.Q9P209.CEP72_HUMAN	0.0359354	0.299245	0.263221	0.396686	0.779596	-0.0974407	Scaling	Scaling	Scaling	Anti-Scaling
1423	CEP76	CEP76	1.08879e-07	0.457531	2.09266e-13	-0.461848	8.568e-19	0.919379	sp.Q8TAP6.CEP76_HUMAN	0.000507239	0.334809	0.000364043	-0.291895	5.877e-09	0.626703	Scaling	Scaling	Scaling	Scaling
1424	CEP78	CEP78	0.570434	0.0662215	1.12809e-10	-0.539861	4.97274e-06	0.606083	sp.Q5JTW2.5.CEP78_HUMAN	0.540456	-0.0631402	4.3879e-07	-0.39994	0.00299511	0.3368	Buffering	Scaling	Buffering	Scaling
1425	CEP85	CEP85	0.000609288	0.507572	0.000770263	-0.256586	2.5227e-06	0.764158	sp.Q6P2H3.CEP85_HUMAN	0.347349	0.0947427	0.0204997	-0.184971	0.0152257	0.279713	Scaling	Scaling	Buffering	Buffering
1426	CEP89	CEP89	5.34287e-05	0.381989	0.0631159	-0.16528	2.95074e-06	0.547269	sp.Q96ST8.CEP89_HUMAN	0.106612	0.174308	0.257952	-0.122769	0.0315838	0.297077	Scaling	Buffering	Buffering	Buffering
1427	CEP97	CEP97	0.911838	0.0098697	0.110606	-0.152268	0.167576	0.162137	sp.Q8IW35.CEP97_HUMAN	0.802578	-0.0258483	0.0844853	-0.194948	0.218078	0.1691	Buffering	Buffering	Buffering	Buffering
1428	CEPT1	CEPT1	0.0604431	0.174181	0.0231866	-0.150632	0.00209392	0.324813	sp.Q9Y6K0.CEPT1_HUMAN	0.273949	0.119955	0.824873	-0.0201684	0.273381	0.140123	Buffering	Buffering	Buffering	Buffering
1429	CERCAM	CERCAM	0.00309948	0.703693	0.875475	0.0289524	0.0093646	0.674741	sp.Q5T4B2.GT253_HUMAN	0.0236789	0.55031	0.798823	0.0501556	0.0660343	0.500154	Scaling	Buffering	Scaling	Buffering
1430	CERS1	CERS1	0.866424	0.0630858	0.0928251	-0.259312	0.398142	0.322397	sp.P27544.CERS1_HUMAN	0.586654	-0.213227	0.961053	-0.00798979	0.599661	-0.205237	Buffering	Scaling	Anti-Scaling	Buffering
1431	CERS2	CERS2	7.87472e-06	0.335823	0.0473328	-0.2075	6.58369e-06	0.543323	sp.Q96G23.CERS2_HUMAN	0.00272048	0.257254	0.955576	0.00578843	0.0342283	0.251465	Scaling	Buffering	Scaling	Buffering
1432	CERS5	CERS5	0.515132	-0.0660195	0.280188	-0.0798494	0.905746	0.0138299	sp.Q8N5B7.CERS5_HUMAN	0.939411	0.00950878	0.902101	0.00997146	0.997255	-0.000462688	Buffering	Buffering	Buffering	Buffering
1433	CERS6	CERS6	0.273293	0.164198	0.054669	-0.269912	0.019359	0.43411	sp.Q6ZMG9.2.CERS6_HUMAN	0.122369	0.181475	0.0157196	-0.22949	0.00284869	0.410965	Buffering	Scaling	Buffering	Buffering
1434	CES1	CES1	0.273701	0.595733	0.396186	-0.247224	0.1398	0.842957	sp.P23141.2.EST1_HUMAN	0.335353	0.40249	0.357811	-0.21916	0.144565	0.621651	Scaling	Buffering	Scaling	Buffering
1435	CES2	CES2	0.000115098	0.624334	6.34945e-05	-0.335478	1.02608e-07	0.959812	sp.O00748.EST2_HUMAN	0.234627	0.286256	0.0406757	-0.236581	0.0368983	0.522837	Scaling	Scaling	Scaling	Buffering
1436	CES3	CES3	0.0615264	-0.338596	0.00313152	-0.376016	0.840604	0.0374198	sp.Q6UWW8.EST3_HUMAN	0.0397562	-0.80952	0.0332854	-0.658901	0.724962	-0.150619	Anti-Scaling	Scaling	Anti-Scaling	Scaling
1437	CETN3	CETN3	0.00511534	0.347802	1.00071e-09	-0.448067	4.24446e-08	0.795868	tr.E5RJF8.E5RJF8_HUMAN	0.925587	0.0126997	0.0131772	-0.188117	0.165865	0.200817	Scaling	Scaling	Buffering	Buffering
1438	CFB	CFB	0.422741	0.255619	0.508488	0.175006	0.830491	0.0806129	tr.B4E1Z4.B4E1Z4_HUMAN	0.688456	0.146902	0.299783	0.312915	0.702467	-0.166013	Scaling	Anti-Scaling	Buffering	Anti-Scaling
1439	CFDP1	CFDP1	3.49676e-08	0.722354	1.44117e-05	-0.349	9.88423e-13	1.07135	sp.Q9UEE9.CFDP1_HUMAN	4.32115e-05	0.560226	0.0025054	-0.286962	4.59581e-08	0.847188	Scaling	Scaling	Scaling	Scaling
1440	CFH	CFH	0.159915	0.384712	0.530666	0.225449	0.698701	0.159263	sp.P08603.CFAH_HUMAN	0.89373	0.0324433	0.645344	0.14028	0.761501	-0.107837	Scaling	Anti-Scaling	Buffering	Anti-Scaling
1441	CFL1	CFL1	0.314139	0.0887867	0.486744	0.0565151	0.765368	0.0322715	sp.P23528.COF1_HUMAN	0.958468	-0.00629882	0.0702296	-0.164321	0.227148	0.158023	Buffering	Buffering	Buffering	Buffering
1442	CFL2	CFL2	0.0673758	0.499999	0.986481	0.00323767	0.0944615	0.496761	sp.Q9Y281.COF2_HUMAN	0.218828	0.245627	0.609267	0.0722329	0.417561	0.173394	Scaling	Buffering	Buffering	Buffering
1443	CGGBP1	CGGBP1	0.00939333	0.474812	2.81135e-10	-0.447532	2.45729e-05	0.922344	sp.Q9UFW8.CGBP1_HUMAN	0.0217666	0.441188	1.33464e-06	-0.436066	7.70413e-05	0.877254	Scaling	Scaling	Scaling	Scaling
1444	CGN	CGN	0.995801	0.00120764	0.53942	-0.188699	0.586256	0.189907	sp.Q9P2M7.CING_HUMAN	0.663993	-0.07447	0.478375	-0.161467	0.732171	0.0869975	Buffering	Buffering	Buffering	Buffering
1445	CGNL1	CGNL1	0.44673	0.219882	0.858147	-0.0224537	0.410121	0.242335	sp.Q0VF96.CGNL1_HUMAN	0.798454	0.0783978	0.488372	0.0842028	0.985168	-0.00580496	Buffering	Buffering	Buffering	Buffering
1446	CGREF1	CGREF1	0.117414	0.414822	0.456383	-0.196113	0.0737491	0.610935	sp.Q99674.5.CGRE1_HUMAN	0.339242	0.305662	0.372757	0.288394	0.966502	0.0172678	Scaling	Buffering	Scaling	Anti-Scaling
1447	CGRRF1	CGRRF1	0.000326241	0.352798	3.61107e-06	-0.349911	9.67653e-10	0.702709	sp.Q99675.CGRF1_HUMAN	0.0568773	0.419409	0.00684935	-0.532444	0.00065744	0.951852	Scaling	Scaling	Scaling	Scaling
1448	CHAC2	CHAC2	0.41232	0.0980757	0.136317	-0.167106	0.0771428	0.265182	sp.Q8WUX2.CHAC2_HUMAN	0.798785	0.0358029	0.0330906	-0.262336	0.0747097	0.298139	Buffering	Buffering	Buffering	Scaling
1449	CHAF1A	CHAF1A	0.00227436	0.515417	0.000122202	-0.2894	1.79373e-05	0.804816	sp.Q13111.CAF1A_HUMAN	0.753159	-0.0506517	0.0122024	-0.197522	0.371184	0.14687	Scaling	Scaling	Buffering	Buffering
1450	CHAF1B	CHAF1B	0.00135376	0.388072	0.000155373	-0.276886	6.86179e-07	0.664958	sp.Q13112.CAF1B_HUMAN	0.742457	0.0345723	0.0197352	-0.18553	0.0609859	0.220102	Scaling	Scaling	Buffering	Buffering
1451	CHAMP1	CHAMP1	0.0012331	0.404059	7.29325e-06	-0.365131	3.726e-08	0.76919	sp.Q96JM3.CHAP1_HUMAN	0.671377	-0.0448668	0.0136296	-0.17355	0.242676	0.128683	Scaling	Scaling	Buffering	Buffering
1452	CHCHD1	CHCHD1	7.65516e-05	0.330355	2.97094e-06	-0.315523	7.67108e-10	0.645878	sp.Q96BP2.CHCH1_HUMAN	0.799849	0.0560092	0.246659	-0.0815863	0.542897	0.137596	Scaling	Scaling	Buffering	Buffering
1453	CHCHD2	CHCHD2	1.33917e-08	0.343032	0.083479	-0.175322	3.23077e-06	0.518355	sp.Q9Y6H1.CHCH2_HUMAN	0.145867	0.116794	0.141574	-0.17837	0.0137455	0.295165	Scaling	Buffering	Buffering	Buffering
1454	CHCHD3	CHCHD3	2.94372e-11	0.462455	0.0017989	-0.316452	3.73192e-11	0.778907	sp.Q9NX63.CHCH3_HUMAN	0.0915204	0.100938	0.203343	-0.117295	0.0292696	0.218233	Scaling	Scaling	Buffering	Buffering
1455	CHCHD4	CHCHD4	0.00460957	0.331359	1.12911e-13	-0.494386	8.18807e-08	0.825744	sp.Q8N4Q1.2.MIA40_HUMAN	0.0846626	0.249829	0.0312811	-0.172075	0.00636258	0.421904	Scaling	Scaling	Buffering	Buffering
1456	CHCHD5	CHCHD5	0.177105	0.220865	0.22647	-0.144798	0.0516992	0.365663	sp.Q9BSY4.CHCH5_HUMAN	0.810146	0.0415426	0.15624	-0.235506	0.200656	0.277048	Buffering	Buffering	Buffering	Buffering
1457	CHCHD6	CHCHD6	0.0016088	0.362628	0.227567	-0.196583	0.00310275	0.559211	sp.Q9BRQ6.CHCH6_HUMAN	0.0766237	0.20795	0.346437	-0.136032	0.04102	0.343983	Scaling	Buffering	Buffering	Buffering
1458	CHCHD7	CHCHD7	0.00632616	0.286224	0.0634935	-0.26855	0.000557401	0.554774	sp.Q9BUK0.4.CHCH7_HUMAN	0.0777502	0.194554	0.361342	-0.116066	0.0373123	0.310619	Scaling	Scaling	Buffering	Buffering
1459	CHD1	CHD1	0.00132216	0.265937	2.27998e-07	-0.382426	3.95032e-10	0.648364	sp.O14646.CHD1_HUMAN	0.222091	0.0997164	0.00146882	-0.234344	0.00107262	0.33406	Scaling	Scaling	Buffering	Buffering
1460	CHD1L	CHD1L	0.0274339	0.187412	0.000155654	-0.507936	3.43175e-06	0.695349	sp.Q86WJ1.CHD1L_HUMAN	0.116027	0.119675	0.0128134	-0.286024	0.00138708	0.405699	Buffering	Scaling	Buffering	Scaling
1461	CHD2	CHD2	0.124194	0.17011	0.000138348	-0.269248	0.00054894	0.439358	sp.O14647.CHD2_HUMAN	0.00543089	0.276023	0.951576	-0.00312733	0.00607733	0.279151	Buffering	Scaling	Scaling	Buffering
1462	CHD3	CHD3	0.177788	0.164042	0.000197952	-0.366925	4.00589e-05	0.530967	sp.Q12873.3.CHD3_HUMAN	0.996681	-0.00030441	0.00600041	-0.136104	0.0814782	0.1358	Buffering	Scaling	Buffering	Buffering
1463	CHD4	CHD4	0.430882	0.0689788	0.0190768	-0.153522	0.0234418	0.222501	tr.F5GWX5.F5GWX5_HUMAN	0.150007	-0.0786721	0.673014	0.0240379	0.12753	-0.10271	Buffering	Buffering	Buffering	Buffering
1464	CHD5	CHD5	0.194925	0.311323	0.473989	0.0856766	0.371038	0.225647	sp.Q8TDI0.CHD5_HUMAN	0.0923194	0.14067	0.255754	0.062889	0.391358	0.0777807	Scaling	Buffering	Buffering	Buffering
1465	CHD6	CHD6	9.33541e-09	0.396108	0.0899342	-0.241544	0.000100675	0.637652	sp.Q8TD26.CHD6_HUMAN	0.00048553	0.18921	0.0247081	-0.337351	0.00109286	0.526561	Scaling	Buffering	Buffering	Scaling
1466	CHD7	CHD7	0.07098	0.233302	0.0504941	-0.298277	0.00140939	0.53158	sp.Q9P2D1.CHD7_HUMAN	0.00764902	0.198534	0.652751	-0.0413283	0.0206299	0.239863	Buffering	Scaling	Buffering	Buffering
1467	CHD8	CHD8	0.00533835	0.260013	8.97719e-09	-0.417747	3.4458e-09	0.677761	sp.Q9HCK8.CHD8_HUMAN	0.00146047	0.26071	0.00369717	-0.158517	5.3064e-06	0.419227	Scaling	Scaling	Scaling	Buffering
1468	CHD9	CHD9	0.00337593	0.365105	0.000229701	-0.343573	1.32801e-06	0.708678	sp.Q3L8U1.CHD9_HUMAN	0.154285	0.106718	0.539696	-0.038434	0.0937569	0.145152	Scaling	Scaling	Buffering	Buffering
1469	CHDH	CHDH	0.684367	0.126854	0.287379	-0.140326	0.389533	0.26718	sp.Q8NE62.CHDH_HUMAN	0.518888	0.251909	0.829063	-0.0327629	0.466685	0.284672	Buffering	Buffering	Scaling	Buffering
1470	CHEK1	CHEK1	0.00967952	0.28103	1.93676e-10	-0.569111	8.37899e-11	0.850142	sp.O14757.CHK1_HUMAN	0.0252947	0.275665	9.49183e-05	-0.342282	3.80766e-06	0.617947	Scaling	Scaling	Scaling	Scaling
1471	CHEK2	CHEK2	0.380603	0.132374	1.05581e-06	-0.378549	0.00246668	0.510923	sp.O96017.9.CHK2_HUMAN	0.683847	-0.0946396	0.0172602	-0.177771	0.72271	0.0831316	Buffering	Scaling	Buffering	Buffering
1472	CHERP	CHERP	0.000214085	0.441403	2.59995e-06	-0.281836	1.70979e-07	0.723239	tr.J3QK89.J3QK89_HUMAN	0.52865	0.0682325	0.714529	-0.0179902	0.432069	0.0862228	Scaling	Scaling	Buffering	Buffering
1473	CHFR	CHFR	0.670314	0.119499	0.680024	-0.0628915	0.539302	0.182391	sp.Q96EP1.2.CHFR_HUMAN	0.187444	0.201757	0.223053	0.157257	0.795823	0.0444994	Buffering	Buffering	Buffering	Anti-Scaling
1474	CHGB	CHGB	0.687376	0.0760356	0.743055	-0.0672904	0.543054	0.143326	sp.P05060.SCG1_HUMAN	0.510092	0.251486	0.320797	-0.326032	0.130937	0.577518	Buffering	Buffering	Scaling	Scaling
1475	CHI3L1	CHI3L1	0.267712	0.262484	0.0183522	-0.382583	0.00853783	0.645067	sp.P36222.CH3L1_HUMAN	0.108267	1.0274	0.11439	-0.457823	0.0220411	1.48523	Scaling	Scaling	Scaling	Scaling
1476	CHID1	CHID1	0.00344269	0.332061	2.93765e-05	-0.279782	1.37148e-06	0.611843	sp.Q9BWS9.CHID1_HUMAN	0.0274421	0.274674	0.0629052	-0.154393	0.00153041	0.429067	Scaling	Scaling	Scaling	Buffering
1477	CHKA	CHKA	0.0336978	0.309565	0.972998	-0.00436827	0.075567	0.313934	sp.P35790.CHKA_HUMAN	0.549318	0.0871608	0.700407	-0.049901	0.432791	0.137062	Scaling	Buffering	Buffering	Buffering
1478	CHKB	CHKB	0.00193081	0.434699	3.69249e-13	-0.504231	5.37294e-08	0.93893	sp.Q9Y259.CHKB_HUMAN	0.159008	-0.291125	0.0191993	-0.257594	0.871564	-0.0335312	Scaling	Scaling	Anti-Scaling	Scaling
1479	CHL1	CHL1	0.655625	0.193918	0.0581813	-0.277693	0.280497	0.471611	sp.O00533.2.CHL1_HUMAN	0.442115	-0.30794	0.769951	-0.052851	0.521134	-0.255089	Buffering	Scaling	Anti-Scaling	Buffering
1480	CHML	CHML	0.0033669	0.304224	0.65	-0.0649847	0.019123	0.369208	sp.P26374.RAE2_HUMAN	0.0865871	0.132931	0.290168	-0.10997	0.0365448	0.242901	Scaling	Buffering	Buffering	Buffering
1481	CHMP1A	CHMP1A	4.82606e-05	0.440781	4.85528e-08	-0.416755	8.83188e-11	0.857535	tr.A6NG32.A6NG32_HUMAN	0.0297806	0.679404	0.227675	-0.164281	0.0109536	0.843685	Scaling	Scaling	Scaling	Buffering
1482	CHMP1A	CHMP1A	4.82606e-05	0.440781	4.85528e-08	-0.416755	8.83188e-11	0.857535	sp.Q9HD42.CHM1A_HUMAN	0.00270832	0.29518	0.00150353	-0.229473	3.27349e-06	0.524653	Scaling	Scaling	Scaling	Buffering
1483	CHMP1B	CHMP1B	2.72323e-09	0.689806	6.87744e-07	-0.368244	8.78993e-16	1.05805	sp.Q7LBR1.CHM1B_HUMAN	1.11837e-06	0.464731	0.000335003	-0.219715	8.11375e-11	0.684445	Scaling	Scaling	Scaling	Buffering
1484	CHMP2A	CHMP2A	0.00341182	0.275971	0.0418248	-0.159468	6.68534e-05	0.435439	tr.M0R1T5.M0R1T5_HUMAN	0.527192	-0.0587628	0.0816784	-0.145095	0.414803	0.0863323	Scaling	Buffering	Buffering	Buffering
1485	CHMP2A	CHMP2A	0.00341182	0.275971	0.0418248	-0.159468	6.68534e-05	0.435439	tr.M0R1L7.M0R1L7_HUMAN	0.70991	-0.0491822	0.069989	-0.209184	0.303823	0.160001	Scaling	Buffering	Buffering	Buffering
1486	CHMP2B	CHMP2B	7.05083e-05	0.63851	0.286882	-0.0930723	1.4223e-05	0.731582	sp.Q9UQN3.CHM2B_HUMAN	0.0632923	0.286991	5.25763e-05	-0.340547	0.000437303	0.627539	Scaling	Buffering	Scaling	Scaling
1487	CHMP3	CHMP3	0.00866559	0.276603	0.23381	0.10964	0.188732	0.166963	sp.Q9Y3E7.CHMP3_HUMAN	0.0914029	0.147957	0.225239	0.09137	0.581618	0.0565868	Scaling	Anti-Scaling	Buffering	Buffering
1488	CHMP4A	CHMP4A	0.00593087	0.321908	7.73248e-06	-0.386097	4.73779e-07	0.708005	sp.Q9BY43.CHM4A_HUMAN	0.830392	0.0312334	0.0648478	-0.185984	0.164735	0.217217	Scaling	Scaling	Buffering	Buffering
1489	CHMP4B	CHMP4B	8.06401e-18	0.534398	0.43782	0.0981442	0.00196154	0.436253	sp.Q9H444.CHM4B_HUMAN	0.00321591	0.224588	0.460427	0.141884	0.665598	0.0827046	Scaling	Buffering	Buffering	Anti-Scaling
1490	CHMP4C	CHMP4C	0.00726079	0.615638	0.558675	-0.152117	0.00990974	0.767755	sp.Q96CF2.CHM4C_HUMAN	0.349313	0.0962836	0.571498	-0.0662259	0.185449	0.162509	Scaling	Buffering	Buffering	Buffering
1491	CHMP5	CHMP5	3.70232e-06	0.457905	0.06653	-0.111828	4.52662e-08	0.569733	sp.Q9NZZ3.CHMP5_HUMAN	0.611818	0.085695	0.0242712	-0.18327	0.111139	0.268965	Scaling	Buffering	Buffering	Buffering
1492	CHMP6	CHMP6	0.0120962	0.237812	0.165826	-0.129379	0.00299589	0.367191	sp.Q96FZ7.CHMP6_HUMAN	0.661637	0.0405661	0.0905617	-0.179781	0.0931286	0.220347	Buffering	Buffering	Buffering	Buffering
1493	CHMP7	CHMP7	3.85008e-08	0.554152	2.02232e-22	-0.607543	1.23012e-18	1.16169	sp.Q8WUX9.CHMP7_HUMAN	9.15304e-05	0.426347	5.5797e-13	-0.4802	5.55904e-12	0.906547	Scaling	Scaling	Scaling	Scaling
1494	CHN1	CHN1	0.0217005	0.762425	0.227269	0.250974	0.150171	0.511451	sp.P15882.CHIN_HUMAN	0.500277	-0.151309	0.13541	-0.193056	0.858482	0.0417474	Scaling	Anti-Scaling	Anti-Scaling	Buffering
1495	CHN2	CHN2	0.0362332	0.334446	0.550952	0.135936	0.417118	0.19851	sp.P52757.CHIO_HUMAN	0.565678	0.241744	0.887455	-0.0707041	0.538206	0.312449	Scaling	Anti-Scaling	Buffering	Buffering
1496	CHORDC1	CHORDC1	6.59254e-05	0.484142	0.000172083	-0.391954	4.07058e-09	0.876096	sp.Q9UHD1.CHRD1_HUMAN	0.100635	0.199312	0.000119498	-0.365722	6.44442e-05	0.565034	Scaling	Scaling	Buffering	Scaling
1497	CHP1	CHP1	0.0138228	0.339957	0.157604	-0.103496	0.00269836	0.443454	sp.Q99653.CHP1_HUMAN	0.543126	0.0882534	0.927499	0.00724907	0.587091	0.0810043	Scaling	Buffering	Buffering	Buffering
1498	CHPF	CHPF	0.0900724	0.407319	0.660118	0.0676987	0.189798	0.33962	sp.Q8IZ52.CHSS2_HUMAN	0.603515	0.0802613	0.915638	0.0108589	0.691983	0.0694025	Scaling	Buffering	Buffering	Buffering
1499	CHPF2	CHPF2	1.92153e-11	0.643664	0.0748959	-0.220108	5.78376e-09	0.863772	sp.Q9P2E5.CHPF2_HUMAN	0.00255192	0.241862	0.239967	-0.103345	0.000597776	0.345208	Scaling	Buffering	Buffering	Buffering
1500	CHPT1	CHPT1	0.0163027	0.538435	0.0861332	-0.298878	0.00166936	0.837313	sp.Q8WUD6.CHPT1_HUMAN	0.425	0.263009	0.439864	-0.157136	0.227355	0.420144	Scaling	Scaling	Scaling	Buffering
1501	CHRAC1	CHRAC1	6.69822e-06	0.325831	0.0412717	-0.214929	4.91273e-06	0.54076	sp.Q9NRG0.CHRC1_HUMAN	0.00807271	0.172549	0.857459	-0.0173284	0.0596599	0.189877	Scaling	Buffering	Buffering	Buffering
1502	CHRNE	CHRNE	0.519266	-0.0406166	0.936327	0.00372686	0.517552	-0.0443434	sp.Q04844.ACHE_HUMAN	0.0955431	0.462811	0.0524916	0.25931	0.45557	0.2035	Buffering	Buffering	Scaling	Anti-Scaling
1503	CHST11	CHST11	0.474981	-0.246842	0.605723	0.113159	0.348312	-0.360002	sp.Q9NPF2.CHSTB_HUMAN	0.306755	0.347238	0.885565	0.0385703	0.428312	0.308668	Anti-Scaling	Anti-Scaling	Scaling	Buffering
1504	CHST12	CHST12	0.00388522	0.287324	0.174817	-0.189789	0.00216844	0.477113	sp.Q9NRB3.CHSTC_HUMAN	0.141699	0.174528	0.413118	-0.12078	0.0630705	0.295308	Scaling	Buffering	Buffering	Buffering
1505	CHST14	CHST14	0.777836	-0.0686919	0.0459381	-0.212728	0.560696	0.144036	sp.Q8NCH0.CHSTE_HUMAN	0.206848	0.240601	0.795052	-0.0270516	0.159807	0.267653	Buffering	Buffering	Buffering	Buffering
1506	CHSY1	CHSY1	0.713106	-0.0927896	2.68999e-06	-0.506385	0.119072	0.413595	sp.Q86X52.CHSS1_HUMAN	0.797742	-0.0467358	0.151458	-0.138128	0.632523	0.091392	Buffering	Scaling	Buffering	Buffering
1507	CHSY3	CHSY3	0.997698	-0.000330168	0.763551	0.0285586	0.828635	-0.0288888	sp.Q70JA7.CHSS3_HUMAN	0.369725	0.198791	0.329129	0.16758	0.902436	0.0312118	Buffering	Buffering	Buffering	Anti-Scaling
1508	CHTF18	CHTF18	0.354967	0.117075	0.00041789	-0.27358	0.00506577	0.390655	sp.Q8WVB6.CTF18_HUMAN	0.178668	0.168752	0.58525	-0.0291709	0.12181	0.197923	Buffering	Scaling	Buffering	Buffering
1509	CHTF8	CHTF8	0.0519659	0.164902	7.73963e-10	-0.324929	9.41343e-07	0.489831	sp.P0CG13.CTF8_HUMAN	0.634449	0.0563821	0.844472	0.0180051	0.772662	0.038377	Buffering	Scaling	Buffering	Buffering
1510	CHTF8	CHTF8	0.0519659	0.164902	7.73963e-10	-0.324929	9.41343e-07	0.489831	sp.P0CG12.CTF8A_HUMAN	0.186461	0.174534	0.288389	-0.115539	0.0494432	0.290073	Buffering	Scaling	Buffering	Buffering
1511	CHTOP	CHTOP	0.00311445	0.169135	6.77875e-05	-0.41883	4.06616e-07	0.587966	sp.Q9Y3Y2.3.CHTOP_HUMAN	0.75993	-0.0217375	0.151918	-0.136637	0.286701	0.1149	Buffering	Scaling	Buffering	Buffering
1512	CHUK	CHUK	0.0356734	0.299829	2.32955e-10	-0.415592	2.19039e-05	0.715421	sp.O15111.IKKA_HUMAN	0.214471	0.149342	0.00638457	-0.182047	0.0108519	0.331389	Scaling	Scaling	Buffering	Buffering
1513	CHURC1	CHURC1	4.84945e-05	0.391251	2.74021e-10	-0.360705	1.1855e-11	0.751956	sp.Q8WUH1.2.CHUR_HUMAN	0.998962	0.000227427	0.981531	0.00297729	0.988485	-0.00274986	Scaling	Scaling	Buffering	Buffering
1514	CIAO1	CIAO1	0.0023914	0.217725	0.293225	-0.0727104	0.00168795	0.290435	sp.O76071.CIAO1_HUMAN	0.715005	0.0411566	0.235598	-0.0931969	0.299762	0.134354	Buffering	Buffering	Buffering	Buffering
1515	CIAPIN1	CIAPIN1	4.15602e-05	0.306368	5.82787e-10	-0.411583	1.35292e-13	0.717951	sp.Q6FI81.CPIN1_HUMAN	0.00616981	0.326804	0.00111881	-0.283654	4.63227e-06	0.610458	Scaling	Scaling	Scaling	Scaling
1516	CIB1	CIB1	9.4227e-06	0.751087	0.0507875	-0.169033	3.91592e-07	0.920119	sp.Q99828.CIB1_HUMAN	0.291016	0.252323	0.560158	0.0759969	0.48023	0.176326	Scaling	Buffering	Scaling	Buffering
1517	CIC	CIC	0.00282796	0.272256	5.10867e-05	-0.339045	3.78068e-08	0.611301	sp.Q96RK0.CIC_HUMAN	0.0025154	0.242394	0.071545	-0.127456	0.00015918	0.36985	Scaling	Scaling	Buffering	Buffering
1518	CIC	CIC	0.00282796	0.272256	5.10867e-05	-0.339045	3.78068e-08	0.611301	tr.I3L2J0.I3L2J0_HUMAN	0.00236933	0.279058	0.113289	-0.105416	0.00016206	0.384474	Scaling	Scaling	Scaling	Buffering
1519	CINP	CINP	1.36831e-05	0.394985	0.000207376	-0.246663	9.74537e-10	0.641648	sp.Q9BW66.3.CINP_HUMAN	0.032739	-0.229225	0.0279889	-0.172524	0.63368	-0.0567015	Scaling	Buffering	Anti-Scaling	Buffering
1520	CIR1	CIR1	0.00411154	0.242127	9.42338e-08	-0.352588	1.17041e-08	0.594715	sp.Q86X95.CIR1_HUMAN	0.618158	0.0399771	0.162265	-0.0912739	0.164092	0.131251	Buffering	Scaling	Buffering	Buffering
1521	CIRBP	CIRBP	0.103357	0.289773	3.88017e-11	-0.52699	8.13881e-05	0.816762	sp.Q14011.CIRBP_HUMAN	0.203004	0.244717	0.0542439	-0.151395	0.045757	0.396112	Scaling	Scaling	Buffering	Buffering
1522	CISD1	CISD1	0.0885067	0.251501	6.23815e-05	-0.290588	0.00113012	0.54209	sp.Q9NZ45.CISD1_HUMAN	0.943034	-0.0146184	0.336927	-0.0826295	0.747001	0.0680111	Scaling	Scaling	Buffering	Buffering
1523	CISD2	CISD2	0.256427	0.273776	1.14915e-07	-0.300526	0.0280757	0.574303	sp.Q8N5K1.CISD2_HUMAN	0.479336	0.189862	0.00483876	-0.144212	0.223346	0.334074	Scaling	Scaling	Buffering	Buffering
1524	CISD3	CISD3	0.0228977	0.204942	0.245356	-0.156196	0.0165281	0.361138	sp.P0C7P0.CISD3_HUMAN	0.508585	0.0885037	0.111849	-0.247185	0.0791824	0.335689	Buffering	Buffering	Buffering	Buffering
1525	CIT	CIT	0.910874	-0.0142188	0.333825	-0.116993	0.526209	0.102774	sp.O14578.4.CTRO_HUMAN	0.697218	-0.0407231	0.283551	0.0765282	0.316475	-0.117251	Buffering	Buffering	Buffering	Buffering
1526	CIZ1	CIZ1	0.00603877	0.221333	7.80211e-06	-0.287084	1.28206e-07	0.508417	sp.Q9ULV3.2.CIZ1_HUMAN	0.327952	0.114775	0.0872499	-0.138139	0.0513394	0.252914	Buffering	Scaling	Buffering	Buffering
1527	CKAP2	CKAP2	0.0467988	0.202682	1.51027e-07	-0.399142	3.31935e-07	0.601823	sp.Q8WWK9.CKAP2_HUMAN	0.217687	0.178095	0.00639915	-0.248141	0.00453609	0.426236	Buffering	Scaling	Buffering	Buffering
1528	CKAP2L	CKAP2L	0.053083	0.276529	0.499835	0.0808212	0.252197	0.195708	sp.Q8IYA6.CKP2L_HUMAN	0.957326	0.0060905	0.263672	0.0949967	0.475123	-0.0889062	Scaling	Buffering	Buffering	Buffering
1529	CKAP4	CKAP4	0.0569561	0.382231	0.555942	-0.122472	0.0457046	0.504702	sp.Q07065.CKAP4_HUMAN	0.00837832	0.410887	0.941598	-0.0107325	0.0239043	0.42162	Scaling	Buffering	Scaling	Buffering
1530	CKAP5	CKAP5	0.00299719	0.341584	0.0473388	-0.142685	0.000138666	0.484269	sp.Q14008.CKAP5_HUMAN	0.161085	0.119743	0.0252101	-0.134995	0.00832945	0.254738	Scaling	Buffering	Buffering	Buffering
1531	CKB	CKB	0.303556	0.326644	0.105294	-0.426199	0.0376972	0.752843	sp.P12277.KCRB_HUMAN	0.878626	-0.0375618	0.12847	-0.285364	0.367473	0.247802	Scaling	Scaling	Buffering	Scaling
1532	CKM	CKM	0.840627	0.025594	0.0192192	-0.146802	0.164075	0.172396	sp.P06732.KCRM_HUMAN	0.445334	0.316305	0.788389	0.149114	0.794013	0.167191	Buffering	Buffering	Scaling	Anti-Scaling
1533	CKMT1A	CKMT1A	0.231867	0.565798	0.0446494	0.512438	0.912735	0.0533607	sp.P12532.KCRU_HUMAN	0.952677	-0.0244659	0.291447	0.216006	0.571829	-0.240472	Scaling	Anti-Scaling	Buffering	Anti-Scaling
1534	CKMT2	CKMT2	0.539537	-0.0491873	0.0178705	-0.139816	0.230726	0.0906283	sp.P17540.KCRS_HUMAN	0.483365	-0.124746	0.0793956	0.293002	0.0507506	-0.417748	Buffering	Buffering	Anti-Scaling	Anti-Scaling
1535	CKS1B	CKS1B	0.00747422	0.186197	0.0250532	-0.260195	0.000410031	0.446392	sp.P61024.CKS1_HUMAN	0.0300136	0.284885	0.804961	-0.0364569	0.0658791	0.321342	Buffering	Scaling	Scaling	Buffering
1536	CKS2	CKS2	0.0808593	0.186691	1.52907e-07	-0.434753	1.09865e-06	0.621445	sp.P33552.CKS2_HUMAN	0.813918	-0.0402274	9.64684e-05	-0.445828	0.0293173	0.4056	Buffering	Scaling	Buffering	Scaling
1537	CLASP1	CLASP1	0.0177601	0.2959	0.0728278	-0.167333	0.00171758	0.463232	sp.Q7Z460.CLAP1_HUMAN	0.031159	0.216384	0.143022	-0.0966849	0.00604841	0.313069	Scaling	Buffering	Buffering	Buffering
1538	CLASP1	CLASP1	0.0177601	0.2959	0.0728278	-0.167333	0.00171758	0.463232	tr.B7ZLX3.B7ZLX3_HUMAN	0.61015	0.0995556	0.752252	-0.0360704	0.51337	0.135626	Scaling	Buffering	Buffering	Buffering
1539	CLASP2	CLASP2	0.170742	0.128254	2.27265e-13	-0.543595	7.79715e-08	0.671848	tr.F5H604.F5H604_HUMAN	0.493827	0.0894647	6.72158e-08	-0.350006	0.00272082	0.439471	Buffering	Scaling	Buffering	Scaling
1540	CLASRP	CLASRP	4.8296e-06	0.365593	0.00329477	-0.211429	1.77761e-09	0.577022	sp.Q8N2M8.CLASR_HUMAN	0.304487	0.0700759	0.909766	-0.00734667	0.335503	0.0774226	Scaling	Buffering	Buffering	Buffering
1541	CLCC1	CLCC1	0.000228805	0.480553	0.0747534	-0.145178	1.29406e-05	0.62573	sp.Q96S66.CLCC1_HUMAN	0.0511134	0.245634	0.410773	-0.0743166	0.0219571	0.31995	Scaling	Buffering	Buffering	Buffering
1542	CLCN2	CLCN2	0.000458478	0.361665	0.0185944	-0.293232	8.89237e-06	0.654897	sp.P51788.CLCN2_HUMAN	0.0769806	0.210543	0.464868	-0.114026	0.0650794	0.324568	Scaling	Scaling	Buffering	Buffering
1543	CLCN3	CLCN3	0.243098	0.375958	0.000143078	-0.288962	0.0507346	0.66492	sp.P51790.2.CLCN3_HUMAN	0.0742754	0.480398	0.00108864	-0.211583	0.0160301	0.691981	Scaling	Scaling	Scaling	Buffering
1544	CLCN6	CLCN6	0.000494006	0.447757	0.000245703	-0.316457	2.57629e-07	0.764214	sp.P51797.CLCN6_HUMAN	0.103375	0.289236	0.553538	-0.0521243	0.06393	0.34136	Scaling	Scaling	Scaling	Buffering
1545	CLCN7	CLCN7	0.0030887	0.356561	0.00125278	-0.324928	1.67741e-06	0.681488	sp.P51798.CLCN7_HUMAN	0.985293	-0.0024033	0.549588	-0.0477298	0.737092	0.0453265	Scaling	Scaling	Buffering	Buffering
1546	CLDN1	CLDN1	0.00150465	1.04589	0.696251	-0.15956	0.0106515	1.20545	sp.O95832.CLD1_HUMAN	0.0366724	0.443552	0.473082	-0.202644	0.037186	0.646196	Scaling	Buffering	Scaling	Buffering
1547	CLDN11	CLDN11	0.0355082	0.628433	0.723637	-0.101808	0.0561065	0.730241	sp.O75508.CLD11_HUMAN	0.000982819	1.61357	0.939208	-0.0533122	0.0428328	1.66688	Scaling	Buffering	Scaling	Buffering
1548	CLDN12	CLDN12	2.24305e-06	0.552275	0.174121	-0.167002	2.83369e-07	0.719277	sp.P56749.CLD12_HUMAN	0.836413	-0.0388388	0.550973	-0.121526	0.688442	0.0826873	Scaling	Buffering	Buffering	Buffering
1549	CLDN18	CLDN18	0.358664	0.117943	0.995715	-0.000677774	0.484453	0.11862	sp.P56856.2.CLD18_HUMAN	0.117628	0.941919	0.668739	-0.531053	0.259821	1.47297	Buffering	Buffering	Scaling	Scaling
1550	CLDN3	CLDN3	0.324976	-0.288416	0.245254	-0.421624	0.730558	0.133208	sp.O15551.CLD3_HUMAN	0.830055	-0.0535579	0.674437	-0.127376	0.812242	0.0738177	Anti-Scaling	Scaling	Buffering	Buffering
1551	CLDN4	CLDN4	0.238862	-0.437385	0.604364	0.257108	0.186679	-0.694494	sp.O14493.CLD4_HUMAN	0.42164	-0.243261	0.840118	0.0915046	0.457225	-0.334766	Anti-Scaling	Anti-Scaling	Anti-Scaling	Buffering
1552	CLDN6	CLDN6	0.0348899	-0.314327	0.807954	0.0489796	0.0641831	-0.363306	sp.P56747.CLD6_HUMAN	0.223388	0.620795	0.416823	0.386554	0.689261	0.234242	Anti-Scaling	Buffering	Scaling	Anti-Scaling
1553	CLDN7	CLDN7	0.992536	-0.00563317	0.0583485	0.647465	0.293066	-0.653099	sp.O95471.CLD7_HUMAN	0.167822	-0.799928	0.970916	-0.00970007	0.177803	-0.790228	Buffering	Anti-Scaling	Anti-Scaling	Buffering
1554	CLDND1	CLDND1	0.166038	0.134616	0.528371	-0.0921692	0.167401	0.226785	sp.Q9NY35.CLDN1_HUMAN	0.0319707	0.185883	0.873386	0.0196106	0.231656	0.166273	Buffering	Buffering	Buffering	Buffering
1555	CLEC11A	CLEC11A	0.795808	-0.0911921	0.0242013	-0.553151	0.213681	0.461959	sp.Q9Y240.CLC11_HUMAN	0.665214	-0.116783	0.577522	-0.115482	0.996456	-0.00130044	Buffering	Scaling	Anti-Scaling	Buffering
1556	CLEC16A	CLEC16A	0.00785618	0.326228	2.05075e-05	-0.305804	6.5827e-06	0.632033	sp.Q2KHT3.CL16A_HUMAN	0.207266	0.0984715	0.509373	0.0281865	0.369594	0.070285	Scaling	Scaling	Buffering	Buffering
1557	CLGN	CLGN	0.172823	0.649667	0.271581	-0.185903	0.0879983	0.83557	sp.O14967.CLGN_HUMAN	0.806591	0.148773	0.769697	-0.0460652	0.749706	0.194838	Scaling	Buffering	Buffering	Buffering
1558	CLIC1	CLIC1	0.0113883	0.307444	0.356525	-0.0849023	0.00531614	0.392346	sp.O00299.CLIC1_HUMAN	0.07351	0.238911	0.037882	-0.217774	0.00350984	0.456685	Scaling	Buffering	Buffering	Buffering
1559	CLIC3	CLIC3	0.0857402	0.56449	0.0695158	0.445354	0.744821	0.119137	sp.O95833.CLIC3_HUMAN	0.511842	0.192432	0.0980518	0.370324	0.573909	-0.177892	Scaling	Anti-Scaling	Buffering	Anti-Scaling
1560	CLIC4	CLIC4	0.00456307	0.552544	0.0164089	-0.371939	4.97466e-05	0.924483	sp.Q9Y696.CLIC4_HUMAN	0.352268	0.148254	0.0589526	-0.21068	0.0417207	0.358934	Scaling	Scaling	Buffering	Buffering
1561	CLIC5	CLIC5	0.556626	-0.119324	0.54021	0.114308	0.353888	-0.233632	sp.Q9NZA1.CLIC5_HUMAN	0.420162	-0.428529	0.258993	-0.699983	0.724668	0.271454	Anti-Scaling	Anti-Scaling	Anti-Scaling	Scaling
1562	CLIC6	CLIC6	0.80286	0.0279057	0.386789	0.0712002	0.730719	-0.0432945	sp.Q96NY7.CLIC6_HUMAN	0.435128	0.303026	0.896354	-0.0643424	0.541131	0.367368	Buffering	Buffering	Scaling	Buffering
1563	CLINT1	CLINT1	0.000157662	0.287202	0.00749017	-0.166444	4.73636e-07	0.453646	sp.Q14677.EPN4_HUMAN	0.939698	0.00811471	0.213551	-0.11701	0.337728	0.125125	Scaling	Buffering	Buffering	Buffering
1564	CLINT1	CLINT1	0.000157662	0.287202	0.00749017	-0.166444	4.73636e-07	0.453646	sp.Q14677.3.EPN4_HUMAN	0.509551	0.0429839	0.573902	-0.0276648	0.351998	0.0706487	Scaling	Buffering	Buffering	Buffering
1565	CLIP1	CLIP1	0.0285726	0.317211	0.330811	-0.118522	0.0135025	0.435733	sp.P30622.2.CLIP1_HUMAN	0.00180163	0.418399	0.289707	-0.150017	0.00124084	0.568415	Scaling	Buffering	Scaling	Buffering
1566	CLIP1	CLIP1	0.0285726	0.317211	0.330811	-0.118522	0.0135025	0.435733	sp.P30622.1.CLIP1_HUMAN	0.0155886	0.235547	0.186574	-0.124341	0.00374153	0.359888	Scaling	Buffering	Buffering	Buffering
1567	CLIP2	CLIP2	0.00297909	0.432638	0.0244733	-0.390599	2.44841e-05	0.823237	sp.Q9UDT6.CLIP2_HUMAN	0.00309139	0.315733	0.0485155	-0.252966	7.0074e-05	0.568699	Scaling	Scaling	Scaling	Scaling
1568	CLIP2	CLIP2	0.00297909	0.432638	0.0244733	-0.390599	2.44841e-05	0.823237	sp.Q9UDT6.2.CLIP2_HUMAN	0.318865	0.274608	0.160819	-0.510095	0.0552598	0.784703	Scaling	Scaling	Scaling	Scaling
1569	CLIP4	CLIP4	0.0708828	0.536066	0.0847345	0.432804	0.767005	0.103263	sp.Q8N3C7.CLIP4_HUMAN	0.384753	0.0835727	0.171895	-0.120482	0.0819139	0.204055	Scaling	Anti-Scaling	Buffering	Buffering
1570	CLK1	CLK1	0.0112668	0.236721	3.57464e-06	-0.352416	1.72612e-07	0.589137	sp.P49759.3.CLK1_HUMAN	0.0649197	0.222472	0.190367	-0.122022	0.0159267	0.344494	Buffering	Scaling	Buffering	Buffering
1571	CLK2	CLK2	1.33401e-05	0.362571	1.34007e-06	-0.638486	5.01495e-11	1.00106	sp.P49760.CLK2_HUMAN	0.56238	0.0588938	0.084792	-0.163924	0.0808226	0.222818	Scaling	Scaling	Buffering	Buffering
1572	CLK3	CLK3	0.128996	0.153172	1.36077e-11	-0.370276	1.84506e-05	0.523448	sp.P49761.CLK3_HUMAN	0.547665	0.0793572	0.184398	-0.0831251	0.236079	0.162482	Buffering	Scaling	Buffering	Buffering
1573	CLK4	CLK4	0.00507739	0.288026	0.00181085	-0.267083	7.24443e-06	0.55511	sp.Q9HAZ1.CLK4_HUMAN	0.354629	0.155152	0.0271938	-0.34845	0.0148178	0.503601	Scaling	Scaling	Buffering	Scaling
1574	CLMN	CLMN	0.0260255	0.472124	0.933317	0.0118366	0.040791	0.460287	sp.Q96JQ2.CLMN_HUMAN	0.00625818	0.511661	0.57341	-0.074723	0.00322376	0.586384	Scaling	Buffering	Scaling	Buffering
1575	CLMP	CLMP	0.864784	0.0511129	0.8136	0.055808	0.988775	-0.00469507	sp.Q9H6B4.CLMP_HUMAN	0.64091	0.222847	0.517533	0.261714	0.941572	-0.0388667	Buffering	Buffering	Buffering	Anti-Scaling
1576	CLN3	CLN3	0.00602718	0.415128	0.0211742	-0.189487	0.000229405	0.604614	sp.Q13286.CLN3_HUMAN	0.622074	0.0825823	0.149722	-0.171985	0.164998	0.254568	Scaling	Buffering	Buffering	Buffering
1577	CLN5	CLN5	0.00135427	0.37075	8.02695e-08	-0.390956	8.3701e-09	0.761706	sp.O75503.CLN5_HUMAN	0.128479	0.257727	7.65543e-05	-0.379871	0.000400705	0.637597	Scaling	Scaling	Scaling	Scaling
1578	CLN6	CLN6	0.00032397	0.423297	0.000295265	-0.310832	1.14343e-07	0.734129	sp.Q9NWW5.CLN6_HUMAN	0.447112	0.187235	0.0279006	-0.259898	0.0889191	0.447134	Scaling	Scaling	Buffering	Scaling
1579	CLN8	CLN8	0.207358	0.150653	2.85924e-08	-0.465444	2.098e-06	0.616098	sp.Q9UBY8.CLN8_HUMAN	0.875537	-0.0405219	0.166802	-0.189748	0.542834	0.149226	Buffering	Scaling	Buffering	Buffering
1580	CLNS1A	CLNS1A	5.58014e-05	0.330017	0.00440535	-0.289514	4.04121e-07	0.619531	sp.P54105.ICLN_HUMAN	0.0517437	0.203991	0.308125	-0.0889781	0.0137289	0.292969	Scaling	Scaling	Buffering	Buffering
1581	CLP1	CLP1	0.020433	0.174728	0.0746739	-0.135326	0.00152593	0.310053	sp.Q92989.CLP1_HUMAN	0.00200161	0.164311	0.712986	-0.0169233	0.00260596	0.181234	Buffering	Buffering	Buffering	Buffering
1582	CLPB	CLPB	0.00230429	0.263274	0.0253267	-0.222257	4.20772e-05	0.485531	sp.Q9H078.2.CLPB_HUMAN	0.00392646	0.225178	0.972251	0.00273036	0.0196708	0.222448	Scaling	Buffering	Buffering	Buffering
1583	CLPP	CLPP	0.147025	0.201569	2.28157e-13	-0.43225	0.000110889	0.633819	sp.Q16740.CLPP_HUMAN	0.415403	0.100527	1.70143e-06	-0.284159	0.0043732	0.384686	Buffering	Scaling	Buffering	Scaling
1584	CLPTM1	CLPTM1	7.29475e-09	0.478245	0.00655637	-0.176469	8.78964e-13	0.654714	sp.O96005.CLPT1_HUMAN	0.005743	0.292564	0.595259	-0.0454789	0.00298794	0.338043	Scaling	Buffering	Scaling	Buffering
1585	CLPTM1L	CLPTM1L	2.05591e-13	0.653477	0.0976903	-0.263517	1.19478e-06	0.916994	sp.Q96KA5.CLP1L_HUMAN	4.46776e-10	0.49895	0.329762	-0.143581	9.05174e-05	0.642532	Scaling	Scaling	Scaling	Buffering
1586	CLPX	CLPX	6.71187e-05	0.456141	1.3803e-08	-0.343897	5.76823e-09	0.800038	sp.O76031.CLPX_HUMAN	0.0677078	0.17824	0.44288	-0.0374046	0.0356938	0.215644	Scaling	Scaling	Buffering	Buffering
1587	CLSPN	CLSPN	0.0211186	0.445061	2.43213e-05	-0.429632	4.54452e-05	0.874693	sp.Q9HAW4.CLSPN_HUMAN	0.00379172	0.493847	0.00353252	-0.372202	1.60032e-05	0.866049	Scaling	Scaling	Scaling	Scaling
1588	CLSTN1	CLSTN1	0.128602	0.208696	0.0736982	-0.163168	0.0143589	0.371863	sp.O94985.CSTN1_HUMAN	0.166357	0.219801	0.130061	-0.132989	0.0381603	0.35279	Buffering	Buffering	Buffering	Buffering
1589	CLSTN2	CLSTN2	0.665123	0.069511	0.0128849	-0.304066	0.0286922	0.373577	sp.Q9H4D0.CSTN2_HUMAN	0.326405	0.599512	0.43428	-0.307164	0.115272	0.906676	Buffering	Scaling	Scaling	Scaling
1590	CLSTN3	CLSTN3	0.0545973	0.350075	0.0962811	-0.243616	0.00352045	0.593691	sp.Q9BQT9.2.CSTN3_HUMAN	0.212692	0.281416	0.574918	0.097542	0.446487	0.183874	Scaling	Buffering	Scaling	Buffering
1591	CLTA	CLTA	0.000315683	0.360183	0.00580836	-0.164799	1.83089e-06	0.524982	sp.P09496.2.CLCA_HUMAN	0.130706	-0.182614	0.237666	-0.0724835	0.356442	-0.110131	Scaling	Buffering	Anti-Scaling	Buffering
1592	CLTB	CLTB	0.000795602	0.421499	0.69756	0.0423073	0.0103816	0.379192	sp.P09497.2.CLCB_HUMAN	0.217609	0.138216	0.20059	-0.0978266	0.0573483	0.236042	Scaling	Buffering	Buffering	Buffering
1593	CLTC	CLTC	1.00181e-06	0.386259	0.00722173	-0.293049	1.20051e-07	0.679308	tr.J3KRF5.J3KRF5_HUMAN	0.343373	0.528924	0.105329	-0.999821	0.0299884	1.52875	Scaling	Scaling	Scaling	Scaling
1594	CLTC	CLTC	1.00181e-06	0.386259	0.00722173	-0.293049	1.20051e-07	0.679308	sp.Q00610.CLH1_HUMAN	0.805074	0.017935	0.00599235	-0.210159	0.018552	0.228094	Scaling	Scaling	Buffering	Buffering
1595	CLU	CLU	0.658034	-0.276741	0.115545	0.45381	0.234047	-0.730551	sp.P10909.2.CLUS_HUMAN	0.789449	0.100304	0.331525	0.154953	0.882429	-0.0546491	Anti-Scaling	Anti-Scaling	Buffering	Anti-Scaling
1596	CLUAP1	CLUAP1	0.000133754	0.499579	2.71329e-05	-0.320763	2.83649e-08	0.820342	sp.Q96AJ1.CLUA1_HUMAN	0.91332	-0.0187969	0.758284	-0.0317033	0.945393	0.0129064	Scaling	Scaling	Buffering	Buffering
1597	CLUH	CLUH	0.109759	0.177262	5.92327e-07	-0.366391	1.37469e-05	0.543653	tr.I3L2B0.I3L2B0_HUMAN	0.0264081	0.334888	0.0104526	-0.319423	7.09623e-05	0.654311	Buffering	Scaling	Scaling	Scaling
1598	CLUH	CLUH	0.109759	0.177262	5.92327e-07	-0.366391	1.37469e-05	0.543653	sp.O75153.CLU_HUMAN	0.106941	0.190249	0.000284431	-0.245579	0.000543699	0.435828	Buffering	Scaling	Buffering	Buffering
1599	CLYBL	CLYBL	0.00704164	0.613123	1.33534e-05	-0.509424	5.54741e-06	1.12255	sp.Q8N0X4.CLYBL_HUMAN	0.145926	0.377685	7.89848e-05	-0.579556	0.000664909	0.957241	Scaling	Scaling	Scaling	Scaling
1600	CMAS	CMAS	9.65133e-07	0.45939	4.3547e-08	-0.478722	5.51455e-16	0.938111	sp.Q8NFW8.NEUA_HUMAN	0.00311107	0.280905	0.0036007	-0.263432	1.31955e-06	0.544337	Scaling	Scaling	Scaling	Scaling
1601	CMBL	CMBL	0.0096042	0.65916	0.141506	-0.605388	0.00399964	1.26455	sp.Q96DG6.CMBL_HUMAN	0.572881	0.104724	0.044784	-0.494615	0.0225757	0.59934	Scaling	Scaling	Buffering	Scaling
1602	CMC1	CMC1	0.663614	0.0652385	7.51248e-13	-0.429202	0.00414859	0.494441	sp.Q7Z7K0.COXM1_HUMAN	0.0383309	0.22701	0.00166893	-0.223696	0.000262929	0.450706	Buffering	Scaling	Buffering	Buffering
1603	CMC2	CMC2	8.4257e-05	0.460692	0.00676448	-0.218867	4.21731e-07	0.679559	sp.Q9NRP2.COXM2_HUMAN	0.00369668	0.291595	0.0258725	-0.172519	4.50311e-05	0.464114	Scaling	Buffering	Scaling	Buffering
1604	CMIP	CMIP	0.000100722	0.76384	2.10461e-05	-0.506809	1.41617e-08	1.27065	sp.Q8IY22.CMIP_HUMAN	0.0127897	0.371566	0.00253654	-0.321348	5.23828e-05	0.692913	Scaling	Scaling	Scaling	Scaling
1605	CMPK1	CMPK1	0.0723232	0.190086	0.000402242	-0.252326	0.0002982	0.442412	sp.P30085.KCY_HUMAN	0.985105	-0.00304664	0.00612947	-0.282416	0.117386	0.27937	Buffering	Scaling	Buffering	Scaling
1606	CMPK2	CMPK2	0.00326405	-0.426429	0.199694	-0.247897	0.403378	-0.178533	sp.Q5EBM0.CMPK2_HUMAN	0.00707046	-0.42651	0.114234	-0.356857	0.77748	-0.069653	Anti-Scaling	Buffering	Anti-Scaling	Scaling
1607	CMSS1	CMSS1	0.0436502	0.192506	0.0391927	-0.240624	0.00213943	0.43313	sp.Q9BQ75.CMS1_HUMAN	0.135332	0.108927	0.895935	-0.0111779	0.23165	0.120105	Buffering	Buffering	Buffering	Buffering
1608	CMTM3	CMTM3	0.305911	0.322916	0.855493	-0.0366393	0.278228	0.359556	sp.Q96MX0.CKLF3_HUMAN	0.589378	0.188619	0.6287	-0.0926222	0.425339	0.281241	Scaling	Buffering	Buffering	Buffering
1609	CMTM4	CMTM4	0.105713	0.309806	0.00587449	-0.358999	0.00113272	0.668806	sp.Q8IZR5.CKLF4_HUMAN	0.496138	-0.225801	0.00384024	-0.701403	0.20054	0.475602	Scaling	Scaling	Anti-Scaling	Scaling
1610	CMTM5	CMTM5	0.000280986	-0.16541	0.105448	0.253405	0.00597831	-0.418815	sp.Q96DZ9.CKLF5_HUMAN	0.182621	-0.687946	0.957961	0.0204412	0.236462	-0.708387	Anti-Scaling	Anti-Scaling	Anti-Scaling	Buffering
1611	CMTM6	CMTM6	0.12797	0.342397	9.33666e-05	-0.30842	0.00807633	0.650817	sp.Q9NX76.CKLF6_HUMAN	0.920804	-0.02037	0.799777	0.0225701	0.836583	-0.0429401	Scaling	Scaling	Buffering	Buffering
1612	CMTR1	CMTR1	2.6642e-05	0.415212	0.000504794	-0.286823	9.79538e-09	0.702036	sp.Q8N1G2.CMTR1_HUMAN	0.00458721	0.277524	0.0523772	-0.122946	0.000243087	0.40047	Scaling	Scaling	Scaling	Buffering
1613	CMTR2	CMTR2	0.00433683	0.3914	3.12266e-08	-0.426558	2.34352e-07	0.817958	sp.Q8IYT2.CMTR2_HUMAN	0.104536	0.164468	0.00273912	-0.239656	0.000403994	0.404124	Scaling	Scaling	Buffering	Buffering
1614	CNBP	CNBP	0.000524691	0.239581	0.00653258	-0.251081	1.19855e-05	0.490662	sp.P62633.4.CNBP_HUMAN	0.21374	0.110332	0.00386019	-0.359329	0.00051725	0.469662	Buffering	Scaling	Buffering	Scaling
1615	CNBP	CNBP	0.000524691	0.239581	0.00653258	-0.251081	1.19855e-05	0.490662	sp.P62633.3.CNBP_HUMAN	0.415267	0.0946583	0.000290898	-0.50722	0.00019212	0.601879	Buffering	Scaling	Buffering	Scaling
1616	CNDP2	CNDP2	0.0837061	0.486101	3.47764e-10	-0.540391	0.00103735	1.02649	sp.Q96KP4.CNDP2_HUMAN	0.0421254	0.623616	7.13328e-08	-0.513723	0.000744222	1.13734	Scaling	Scaling	Scaling	Scaling
1617	CNEP1R1	CNEP1R1	0.000529694	0.362629	3.42833e-08	-0.379678	2.46804e-09	0.742307	sp.Q8N9A8.2.NEPR1_HUMAN	0.0583245	0.185869	0.374788	0.0840184	0.36885	0.101851	Scaling	Scaling	Buffering	Buffering
1618	CNIH4	CNIH4	0.000587772	0.284379	0.956823	0.00509318	0.0143319	0.279286	sp.Q9P003.CNIH4_HUMAN	6.34419e-05	0.312775	0.127184	0.139595	0.0940804	0.173179	Scaling	Buffering	Scaling	Anti-Scaling
1619	CNN1	CNN1	0.652254	-0.106676	0.157438	-0.212612	0.648842	0.105936	sp.P51911.CNN1_HUMAN	0.738554	-0.117199	0.0523205	-0.451591	0.37866	0.334392	Anti-Scaling	Buffering	Anti-Scaling	Scaling
1620	CNN2	CNN2	0.95234	-0.0179669	0.453138	0.0873196	0.72475	-0.105286	sp.Q99439.CNN2_HUMAN	0.727549	0.100364	0.546204	-0.0573901	0.58711	0.157754	Buffering	Buffering	Buffering	Buffering
1621	CNN3	CNN3	0.000416307	1.24797	0.0427786	-0.552113	7.4446e-06	1.80008	sp.Q15417.CNN3_HUMAN	0.0291563	0.526871	0.0018718	-0.457248	0.000260788	0.984119	Scaling	Scaling	Scaling	Scaling
1622	CNNM2	CNNM2	0.0406984	0.268505	1.85156e-09	-0.386576	2.06376e-05	0.655081	sp.Q9H8M5.CNNM2_HUMAN	0.909377	-0.0260127	0.966158	-0.00433357	0.926757	-0.0216791	Scaling	Scaling	Buffering	Buffering
1623	CNNM3	CNNM3	0.923835	-0.0103109	0.0338296	-0.179518	0.177218	0.169207	sp.Q8NE01.CNNM3_HUMAN	0.491338	0.0652001	0.964947	0.00333921	0.577338	0.0618609	Buffering	Buffering	Buffering	Buffering
1624	CNNM4	CNNM4	0.0570224	0.231187	0.483421	-0.0860877	0.0414986	0.317275	sp.Q6P4Q7.CNNM4_HUMAN	0.236204	0.146482	0.685494	-0.0486455	0.207965	0.195127	Buffering	Buffering	Buffering	Buffering
1625	CNOT1	CNOT1	0.00011134	0.305388	1.33677e-12	-0.458607	4.64272e-14	0.763995	sp.A5YKK6.CNOT1_HUMAN	0.477724	-0.0412209	0.0518083	-0.090541	0.431855	0.04932	Scaling	Scaling	Buffering	Buffering
1626	CNOT10	CNOT10	0.0288962	0.247431	9.85802e-17	-0.480035	1.19758e-06	0.727466	sp.Q9H9A5.6.CNO10_HUMAN	0.755587	-0.0217626	0.336709	-0.0388353	0.806042	0.0170727	Buffering	Scaling	Buffering	Buffering
1627	CNOT11	CNOT11	0.116314	0.0944537	0.130348	-0.120754	0.021008	0.215208	sp.Q9UKZ1.CNO11_HUMAN	0.71293	0.01962	0.380768	-0.0454792	0.319236	0.0650993	Buffering	Buffering	Buffering	Buffering
1628	CNOT2	CNOT2	0.00818213	0.213576	0.117088	-0.17282	0.00311754	0.386396	sp.Q9NZN8.CNOT2_HUMAN	0.129616	0.127192	0.0570598	-0.125242	0.0125927	0.252434	Buffering	Buffering	Buffering	Buffering
1629	CNOT3	CNOT3	3.39027e-05	0.293266	0.0365934	-0.163067	1.09082e-06	0.456333	sp.O75175.CNOT3_HUMAN	0.0276303	0.125359	0.00205428	-0.148683	2.232e-05	0.274042	Scaling	Buffering	Buffering	Buffering
1630	CNOT4	CNOT4	9.40756e-13	0.346043	0.0016543	-0.187633	1.52491e-13	0.533676	sp.O95628.10.CNOT4_HUMAN	4.69549e-05	0.256109	3.10223e-05	-0.34114	8.14574e-11	0.597249	Scaling	Buffering	Scaling	Scaling
1631	CNOT6	CNOT6	0.453725	0.069343	0.00378985	-0.246446	0.00619593	0.315789	sp.Q9ULM6.CNOT6_HUMAN	0.180535	0.121708	0.0611219	-0.153372	0.0127863	0.27508	Buffering	Buffering	Buffering	Buffering
1632	CNOT7	CNOT7	1.10257e-05	0.392585	2.93556e-27	-0.65983	6.28663e-18	1.05241	sp.Q9UIV1.CNOT7_HUMAN	0.286887	0.0995325	7.79422e-07	-0.227055	0.000985101	0.326587	Scaling	Scaling	Buffering	Buffering
1633	CNOT8	CNOT8	0.00437247	0.229208	2.82781e-08	-0.389301	8.63765e-10	0.618509	sp.Q9UFF9.CNOT8_HUMAN	0.607001	0.0393504	0.807952	-0.0158887	0.530646	0.0552391	Buffering	Scaling	Buffering	Buffering
1634	CNP	CNP	0.0574223	0.208298	0.00224749	-0.335433	7.52949e-05	0.543731	sp.P09543.CN37_HUMAN	0.329385	0.106003	0.000349541	-0.393584	0.00043704	0.499586	Buffering	Scaling	Buffering	Scaling
1635	CNPY2	CNPY2	0.0454151	0.237553	0.04664	-0.149148	0.00403997	0.386701	sp.Q9Y2B0.CNPY2_HUMAN	0.00193982	0.417594	0.109157	-0.155851	0.000275954	0.573445	Buffering	Buffering	Scaling	Buffering
1636	CNPY3	CNPY3	0.00167713	0.320836	0.0265126	-0.217833	4.83714e-05	0.538669	sp.Q9BT09.CNPY3_HUMAN	0.0165179	0.253746	0.0351478	-0.206705	0.000608933	0.460452	Scaling	Buffering	Scaling	Buffering
1637	CNPY4	CNPY4	5.50928e-07	0.637163	0.22843	-0.185354	3.87802e-06	0.822517	sp.Q8N129.CNPY4_HUMAN	0.000810468	0.399351	0.985554	-0.00263418	0.0139635	0.401985	Scaling	Buffering	Scaling	Buffering
1638	CNRIP1	CNRIP1	0.536454	0.197209	0.640082	0.151346	0.912421	0.0458623	sp.Q96F85.CNRP1_HUMAN	0.272299	0.304889	0.360127	0.27013	0.923054	0.0347596	Buffering	Anti-Scaling	Scaling	Anti-Scaling
1639	CNST	CNST	0.000706341	0.243248	0.0390901	-0.252558	0.000248644	0.495806	sp.Q6PJW8.CNST_HUMAN	6.12362e-05	0.290257	0.706288	-0.0359565	0.00260612	0.326213	Buffering	Scaling	Scaling	Buffering
1640	CNTLN	CNTLN	0.353936	0.223259	0.00476898	-0.32354	0.0253328	0.546799	sp.Q9NXG0.2.CNTLN_HUMAN	0.303292	0.182483	0.0671582	0.180576	0.991153	0.00190728	Buffering	Scaling	Buffering	Anti-Scaling
1641	CNTN1	CNTN1	0.24755	0.359355	0.0302068	0.518172	0.664436	-0.158818	sp.Q12860.CNTN1_HUMAN	0.255449	0.430135	0.17479	0.342269	0.82774	0.0878662	Scaling	Anti-Scaling	Scaling	Anti-Scaling
1642	CNTNAP1	CNTNAP1	0.607513	0.11181	0.163687	-0.304062	0.137948	0.415872	sp.P78357.CNTP1_HUMAN	0.7769	0.0462448	0.247604	-0.203752	0.252022	0.249997	Buffering	Scaling	Buffering	Buffering
1643	CNTNAP2	CNTNAP2	0.461254	-0.0960434	0.593866	-0.0886734	0.965371	-0.00736998	sp.Q9UHC6.CNTP2_HUMAN	0.816453	0.136597	0.779296	0.215687	0.922798	-0.0790892	Buffering	Buffering	Buffering	Anti-Scaling
1644	CNTNAP3B	CNTNAP3B	0.954763	0.0150815	0.357194	0.155388	0.590009	-0.140306	sp.Q96NU0.CNT3B_HUMAN	0.307113	0.520669	0.648023	0.164879	0.521793	0.35579	Buffering	Anti-Scaling	Scaling	Anti-Scaling
1645	CNTRL	CNTRL	0.0952987	0.209557	0.000202312	-0.369076	4.12841e-05	0.578633	sp.Q7Z7A1.CNTRL_HUMAN	0.00419959	0.368952	0.74388	0.0425478	0.0363165	0.326404	Buffering	Scaling	Scaling	Buffering
1646	CNTROB	CNTROB	0.0607734	0.234628	1.65298e-15	-0.545601	1.43941e-07	0.780229	sp.Q8N137.2.CNTRB_HUMAN	0.475742	0.072489	0.000301508	-0.198004	0.0128672	0.270493	Buffering	Scaling	Buffering	Buffering
1647	COA1	COA1	7.61311e-13	0.446008	0.101758	-0.160201	4.68517e-08	0.606209	sp.Q9GZY4.COA1_HUMAN	1.52827e-05	0.272095	0.0812422	-0.180165	4.69511e-05	0.45226	Scaling	Buffering	Scaling	Buffering
1648	COA3	COA3	0.000647429	0.324469	0.0649435	-0.158042	3.64155e-05	0.482511	sp.Q9Y2R0.COA3_HUMAN	0.122122	0.123096	0.263687	-0.109014	0.0428897	0.232111	Scaling	Buffering	Buffering	Buffering
1649	COA4	COA4	0.000262363	0.299309	0.000802002	-0.287204	1.94168e-07	0.586513	sp.Q9NYJ1.2.COA4_HUMAN	0.0611592	0.381409	0.138527	-0.275689	0.00681306	0.657098	Scaling	Scaling	Scaling	Scaling
1650	COA5	COA5	0.00170242	0.261662	0.00825002	-0.231193	1.70875e-05	0.492854	sp.Q86WW8.COA5_HUMAN	0.930129	-0.0105835	0.207946	0.157468	0.290308	-0.168051	Scaling	Buffering	Buffering	Anti-Scaling
1651	COA6	COA6	6.02541e-05	0.31817	0.000903512	-0.418348	3.57531e-07	0.736518	sp.Q5JTJ3.COA6_HUMAN	0.0294824	0.220098	0.00939424	-0.31506	0.000166683	0.535159	Scaling	Scaling	Buffering	Scaling
1652	COASY	COASY	0.10062	0.14502	0.00388785	-0.268986	0.000569075	0.414005	sp.Q13057.2.COASY_HUMAN	0.926075	0.00992374	0.0488005	-0.215557	0.110963	0.225481	Buffering	Scaling	Buffering	Buffering
1653	COBL	COBL	0.000442106	0.683885	0.0718606	-0.436407	3.42672e-05	1.12029	sp.O75128.2.COBL_HUMAN	0.115437	0.25068	0.0208157	-0.459763	0.00098483	0.710443	Scaling	Scaling	Scaling	Scaling
1654	COBLL1	COBLL1	0.351807	0.206096	0.348558	0.175827	0.90916	0.0302695	sp.Q53SF7.COBL1_HUMAN	0.970888	0.00697602	0.733137	0.0522226	0.835804	-0.0452466	Buffering	Anti-Scaling	Buffering	Buffering
1655	COBLL1	COBLL1	0.351807	0.206096	0.348558	0.175827	0.90916	0.0302695	sp.Q53SF7.2.COBL1_HUMAN	0.476881	-0.352465	0.557531	-0.346611	0.993152	-0.00585427	Buffering	Anti-Scaling	Anti-Scaling	Scaling
1656	COG1	COG1	3.8031e-07	0.3838	0.000126371	-0.299546	2.18129e-11	0.683346	sp.Q8WTW3.COG1_HUMAN	0.574815	-0.0426298	0.266164	-0.0978818	0.60675	0.055252	Scaling	Scaling	Buffering	Buffering
1657	COG2	COG2	4.4266e-09	0.364148	8.52117e-07	-0.444045	9.58584e-14	0.808193	sp.Q14746.COG2_HUMAN	0.533703	0.0444847	0.0394087	-0.152808	0.0330781	0.197292	Scaling	Scaling	Buffering	Buffering
1658	COG3	COG3	0.000350179	0.36758	4.77097e-12	-0.383939	5.30757e-10	0.751518	sp.Q96JB2.COG3_HUMAN	0.000875018	0.36386	0.00380059	-0.157619	8.17653e-06	0.521479	Scaling	Scaling	Scaling	Buffering
1659	COG4	COG4	0.000108279	0.4869	5.62237e-07	-0.333991	1.11255e-08	0.82089	sp.Q9H9E3.COG4_HUMAN	0.158797	0.116419	0.0513079	-0.112396	0.011822	0.228815	Scaling	Scaling	Buffering	Buffering
1660	COG5	COG5	8.07041e-11	0.465505	0.0010575	-0.329493	2.1948e-11	0.794998	sp.Q9UP83.2.COG5_HUMAN	0.195252	0.0745288	0.130497	-0.104686	0.0184883	0.179215	Scaling	Scaling	Buffering	Buffering
1661	COG6	COG6	0.00596576	0.330677	7.86157e-07	-0.315245	1.11117e-06	0.645922	sp.Q9Y2V7.COG6_HUMAN	0.00176842	0.369394	0.0103113	-0.138943	4.59206e-05	0.508337	Scaling	Scaling	Scaling	Buffering
1662	COG7	COG7	1.08827e-05	0.398587	1.76258e-09	-0.380051	1.78298e-12	0.778638	sp.P83436.COG7_HUMAN	0.0130652	0.225827	0.00271263	-0.16005	9.65282e-05	0.385877	Scaling	Scaling	Buffering	Buffering
1663	COG8	COG8	1.34102e-05	0.366268	5.70124e-13	-0.420416	6.29206e-14	0.786684	sp.Q96MW5.COG8_HUMAN	0.964671	0.00317054	0.0183002	-0.133613	0.0915977	0.136783	Scaling	Scaling	Buffering	Buffering
1664	COIL	COIL	1.85297e-06	0.264658	0.000496159	-0.253889	1.09651e-09	0.518547	sp.P38432.COIL_HUMAN	0.000402687	0.268281	0.106051	-0.164047	0.000247317	0.432328	Scaling	Scaling	Scaling	Buffering
1665	COL11A1	COL11A1	0.201496	0.6047	0.0986244	-0.330644	0.0533076	0.935344	sp.P12107.COBA1_HUMAN	0.239617	0.542917	0.049506	-0.406301	0.0448456	0.949217	Scaling	Scaling	Scaling	Scaling
1666	COL12A1	COL12A1	0.162197	-0.612609	0.294723	0.275694	0.0506513	-0.888303	sp.Q99715.COCA1_HUMAN	0.532779	-0.211891	0.172731	0.209004	0.228511	-0.420895	Anti-Scaling	Anti-Scaling	Anti-Scaling	Anti-Scaling
1667	COL14A1	COL14A1	0.516852	0.0935872	0.114538	0.515943	0.215769	-0.422356	sp.Q05707.COEA1_HUMAN	0.930211	0.0185285	0.148099	0.591662	0.161041	-0.573133	Buffering	Anti-Scaling	Buffering	Anti-Scaling
1668	COL15A1	COL15A1	0.515872	-0.114843	0.597698	0.0812026	0.344009	-0.196045	sp.P39059.COFA1_HUMAN	0.777406	0.129484	0.490612	0.292653	0.770305	-0.163169	Anti-Scaling	Buffering	Buffering	Anti-Scaling
1669	COL16A1	COL16A1	0.774726	-0.0856114	0.754151	-0.0676617	0.95593	-0.0179497	sp.Q07092.COGA1_HUMAN	0.389652	-1.10372	0.747175	-0.195683	0.495969	-0.908036	Buffering	Buffering	Anti-Scaling	Buffering
1670	COL17A1	COL17A1	0.627678	-0.280173	0.112861	-0.442288	0.783707	0.162114	sp.Q9UMD9.COHA1_HUMAN	0.240629	-0.504769	0.0858995	-0.382443	0.777895	-0.122326	Anti-Scaling	Scaling	Anti-Scaling	Scaling
1671	COL18A1	COL18A1	0.717073	0.161217	0.469842	-0.16861	0.466598	0.329827	sp.P39060.COIA1_HUMAN	0.502432	-0.156765	0.334148	-0.149398	0.975622	-0.00736691	Buffering	Buffering	Anti-Scaling	Buffering
1672	COL1A1	COL1A1	0.173858	0.510402	0.92634	-0.0326116	0.252227	0.543014	sp.P02452.CO1A1_HUMAN	0.251601	0.251694	0.264064	-0.210361	0.0812628	0.462055	Scaling	Buffering	Scaling	Buffering
1673	COL1A2	COL1A2	0.0252425	0.732374	0.863325	0.0684502	0.147881	0.663924	sp.P08123.CO1A2_HUMAN	0.0158794	0.42641	0.246621	0.206041	0.308664	0.220369	Scaling	Buffering	Scaling	Anti-Scaling
1674	COL21A1	COL21A1	0.733708	0.0467687	0.230779	-0.105662	0.290319	0.15243	sp.Q96P44.COLA1_HUMAN	0.746643	-0.252679	0.125019	0.623961	0.262214	-0.87664	Buffering	Buffering	Anti-Scaling	Anti-Scaling
1675	COL22A1	COL22A1	0.59044	-0.0852628	0.279944	-0.194628	0.587057	0.109365	sp.Q8NFW1.COMA1_HUMAN	0.548708	-0.254688	0.733188	-0.154034	0.856361	-0.100655	Buffering	Buffering	Anti-Scaling	Buffering
1676	COL23A1	COL23A1	0.801733	-0.0472065	0.0451413	-0.200708	0.411513	0.153501	sp.Q86Y22.CONA1_HUMAN	0.557	-1.00522	0.637854	-0.259937	0.663194	-0.74528	Buffering	Buffering	Anti-Scaling	Scaling
1677	COL2A1	COL2A1	0.171415	0.634799	0.139513	-0.169421	0.087228	0.80422	sp.P02458.CO2A1_HUMAN	0.216705	0.549958	0.303989	0.236137	0.509924	0.313821	Scaling	Buffering	Scaling	Anti-Scaling
1678	COL3A1	COL3A1	0.238443	0.665738	0.570385	0.18026	0.429678	0.485478	sp.P02461.CO3A1_HUMAN	0.170807	0.415165	0.260911	0.217919	0.560041	0.197246	Scaling	Anti-Scaling	Scaling	Anti-Scaling
1679	COL4A1	COL4A1	0.0150989	-1.09258	0.785636	-0.0786438	0.0253376	-1.01394	sp.P02462.CO4A1_HUMAN	0.113799	-0.596521	0.643827	-0.117694	0.210519	-0.478827	Anti-Scaling	Buffering	Anti-Scaling	Buffering
1680	COL4A2	COL4A2	0.427472	-0.354898	0.602583	-0.155516	0.660725	-0.199382	sp.P08572.CO4A2_HUMAN	0.0436236	-0.616595	0.506455	-0.131614	0.123858	-0.484981	Anti-Scaling	Buffering	Anti-Scaling	Buffering
1681	COL4A3BP	COL4A3BP	0.0316091	0.228052	0.0235736	-0.207236	0.000531314	0.435288	sp.Q9Y5P4.3.C43BP_HUMAN	0.0218475	0.22399	0.00778451	-0.215714	0.000151934	0.439704	Buffering	Buffering	Buffering	Buffering
1682	COL5A1	COL5A1	0.0207749	1.02062	0.666439	-0.115096	0.0148959	1.13571	sp.P20908.CO5A1_HUMAN	0.0473879	0.514924	0.860768	-0.0300337	0.0423443	0.544958	Scaling	Buffering	Scaling	Buffering
1683	COL5A2	COL5A2	0.181831	0.696742	0.0260464	0.820209	0.835444	-0.123467	sp.P05997.CO5A2_HUMAN	0.887761	0.0461445	0.0319761	0.539758	0.200776	-0.493613	Scaling	Anti-Scaling	Buffering	Anti-Scaling
1684	COL6A1	COL6A1	0.805916	0.136235	0.236576	-0.309977	0.432575	0.446213	sp.P12109.CO6A1_HUMAN	0.635693	0.149667	0.553041	-0.0947994	0.451226	0.244466	Buffering	Scaling	Buffering	Buffering
1685	COL6A2	COL6A2	0.394682	0.505523	0.250135	-0.352011	0.163274	0.857534	sp.P12110.2.CO6A2_HUMAN	0.902006	0.0535575	0.32696	0.387608	0.521766	-0.334051	Scaling	Scaling	Buffering	Anti-Scaling
1686	COL6A2	COL6A2	0.394682	0.505523	0.250135	-0.352011	0.163274	0.857534	sp.P12110.CO6A2_HUMAN	0.259994	0.358982	0.914591	0.0167251	0.291479	0.342257	Scaling	Scaling	Scaling	Buffering
1687	COL6A3	COL6A3	0.165014	0.603956	0.243733	0.390904	0.682116	0.213052	sp.P12111.CO6A3_HUMAN	0.384931	0.184925	0.070199	0.330356	0.584664	-0.145431	Scaling	Anti-Scaling	Buffering	Anti-Scaling
1688	COL6A6	COL6A6	0.84447	-0.00309972	0.3939	-0.0120843	0.537874	0.00898461	sp.A6NMZ7.CO6A6_HUMAN	0.788128	-0.0797283	0.248524	0.581914	0.204989	-0.661642	Buffering	Buffering	Buffering	Anti-Scaling
1689	COL7A1	COL7A1	0.464372	-0.283039	0.657769	0.0958362	0.338733	-0.378875	sp.Q02388.CO7A1_HUMAN	0.106626	-0.442231	0.042307	0.301825	0.0109089	-0.744055	Anti-Scaling	Buffering	Anti-Scaling	Anti-Scaling
1690	COL8A1	COL8A1	0.557275	-0.159527	0.795301	-0.0963447	0.878196	-0.063182	sp.P27658.CO8A1_HUMAN	0.867574	-0.0522629	0.391196	0.32289	0.406429	-0.375153	Anti-Scaling	Buffering	Buffering	Anti-Scaling
1691	COLEC10	COLEC10	0.247066	0.15162	0.911646	-0.0115152	0.281055	0.163135	sp.Q9Y6Z7.COL10_HUMAN	0.105972	-0.326446	0.0129429	-0.515653	0.422362	0.189207	Buffering	Buffering	Anti-Scaling	Scaling
1692	COLEC12	COLEC12	0.489438	0.161008	0.319536	-0.128071	0.221433	0.289079	sp.Q5KU26.COL12_HUMAN	0.880602	-0.0534409	0.0234445	-0.519158	0.191205	0.465717	Buffering	Buffering	Buffering	Scaling
1693	COLGALT1	COLGALT1	0.0614817	0.384633	0.00641774	-0.227251	0.00527201	0.611884	sp.Q8NBJ5.GT251_HUMAN	0.23044	0.307784	0.92609	-0.00769877	0.219921	0.315482	Scaling	Buffering	Scaling	Buffering
1694	COLGALT2	COLGALT2	0.500775	0.112313	0.0293627	-0.345812	0.0220069	0.458125	sp.Q8IYK4.GT252_HUMAN	0.785269	0.0342232	0.513974	0.103982	0.704324	-0.0697588	Buffering	Scaling	Buffering	Anti-Scaling
1695	COMMD1	COMMD1	0.0036083	0.276897	0.0195995	-0.17746	5.87619e-05	0.454357	sp.Q8N668.COMD1_HUMAN	0.24158	0.108889	0.823517	0.018984	0.432933	0.0899054	Scaling	Buffering	Buffering	Buffering
1696	COMMD10	COMMD10	1.62898e-07	0.582181	0.000423089	-0.320681	1.44576e-11	0.902862	sp.Q9Y6G5.COMDA_HUMAN	0.0982212	0.1506	0.170781	-0.0936738	0.01825	0.244274	Scaling	Scaling	Buffering	Buffering
1697	COMMD2	COMMD2	1.41888e-06	0.397951	0.00141444	-0.376774	3.98136e-08	0.774725	sp.Q86X83.COMD2_HUMAN	0.452344	-0.0504039	0.51561	-0.0476816	0.975122	-0.00272237	Scaling	Scaling	Buffering	Buffering
1698	COMMD3	COMMD3	0.00410375	0.506229	1.1939e-06	-0.401965	3.23517e-06	0.908194	sp.Q9UBI1.COMD3_HUMAN	0.533318	0.0650436	0.111732	-0.099814	0.133952	0.164858	Scaling	Scaling	Buffering	Buffering
1699	COMMD4	COMMD4	9.90764e-05	0.380736	0.000219918	-0.273223	1.96818e-08	0.653959	sp.Q9H0A8.COMD4_HUMAN	0.865881	-0.0148656	0.63771	-0.0301465	0.873816	0.015281	Scaling	Scaling	Buffering	Buffering
1700	COMMD5	COMMD5	1.32853e-06	0.314063	0.0633979	-0.153543	8.54485e-07	0.467605	sp.Q9GZQ3.COMD5_HUMAN	0.454298	0.0512336	0.35856	-0.0881268	0.183121	0.13936	Scaling	Buffering	Buffering	Buffering
1701	COMMD6	COMMD6	9.44441e-07	0.560763	3.63168e-11	-0.45139	9.71747e-14	1.01215	sp.Q7Z4G1.COMD6_HUMAN	0.695783	0.0462384	0.860636	0.012482	0.776793	0.0337564	Scaling	Scaling	Buffering	Buffering
1702	COMMD7	COMMD7	1.28345e-07	0.416193	0.317474	0.224427	0.388749	0.191765	sp.Q86VX2.COMD7_HUMAN	0.219855	0.0852317	0.970627	0.00589964	0.625568	0.079332	Scaling	Anti-Scaling	Buffering	Buffering
1703	COMMD8	COMMD8	0.157625	0.238967	2.95826e-10	-0.418767	0.000751543	0.657733	sp.Q9NX08.COMD8_HUMAN	0.280739	0.130176	0.00723879	-0.167826	0.0213425	0.298002	Buffering	Scaling	Buffering	Buffering
1704	COMMD9	COMMD9	0.00249551	0.300228	0.046651	-0.193495	9.36549e-05	0.493723	sp.Q9P000.COMD9_HUMAN	0.541523	0.0605257	0.046024	-0.13715	0.0669608	0.197676	Scaling	Buffering	Buffering	Buffering
1705	COMT	COMT	0.0212277	0.49443	0.067951	-0.217314	0.00226633	0.711744	sp.P21964.COMT_HUMAN	0.0161126	0.480025	0.423695	-0.0843439	0.00743388	0.564369	Scaling	Buffering	Scaling	Buffering
1706	COMTD1	COMTD1	0.535301	0.113437	3.25423e-07	-0.587944	0.00104765	0.701382	sp.Q86VU5.CMTD1_HUMAN	0.208165	-0.2217	0.00161666	-0.364714	0.442422	0.143013	Buffering	Scaling	Anti-Scaling	Scaling
1707	COPA	COPA	0.000840895	0.220354	0.00610629	-0.320586	2.65133e-05	0.54094	sp.P53621.COPA_HUMAN	0.806963	0.0165931	0.418061	-0.0715308	0.376712	0.0881239	Buffering	Scaling	Buffering	Buffering
1708	COPB1	COPB1	3.10411e-06	0.395078	1.37061e-09	-0.365045	1.34853e-13	0.760122	sp.P53618.COPB_HUMAN	0.489136	0.0608184	0.0873252	-0.10231	0.0886531	0.163129	Scaling	Scaling	Buffering	Buffering
1709	COPB2	COPB2	8.93392e-05	0.287278	0.00919491	-0.262303	3.98669e-06	0.549581	sp.P35606.COPB2_HUMAN	0.140171	-0.0928043	0.375575	0.0682154	0.069016	-0.16102	Scaling	Scaling	Buffering	Buffering
1710	COPE	COPE	2.08556e-05	0.478835	5.46356e-13	-0.393808	4.70926e-10	0.872643	sp.O14579.COPE_HUMAN	0.951677	-0.005421	0.250927	-0.0492095	0.636161	0.0437885	Scaling	Scaling	Buffering	Buffering
1711	COPG1	COPG1	0.00192667	0.264828	0.013009	-0.265416	4.45191e-05	0.530244	sp.Q9Y678.COPG1_HUMAN	0.168759	-0.103803	0.0619389	0.15909	0.00981262	-0.262893	Scaling	Scaling	Anti-Scaling	Anti-Scaling
1712	COPG2	COPG2	0.000644116	0.284738	0.170939	-0.139754	0.000223113	0.424492	sp.Q9UBF2.COPG2_HUMAN	0.0167975	0.159756	0.113477	-0.148258	0.00205003	0.308014	Scaling	Buffering	Buffering	Buffering
1713	COPRS	COPRS	0.00233257	0.29679	0.00269566	-0.324011	2.88865e-06	0.620802	tr.H9KV77.H9KV77_HUMAN	0.00888652	0.419385	0.43571	-0.177619	0.0244321	0.597004	Scaling	Scaling	Scaling	Buffering
1714	COPS2	COPS2	0.00138885	0.370445	1.75054e-08	-0.354067	2.10195e-07	0.724512	sp.P61201.CSN2_HUMAN	0.823258	0.0243299	0.175161	-0.0648331	0.423787	0.089163	Scaling	Scaling	Buffering	Buffering
1715	COPS3	COPS3	0.000338262	0.393642	4.7386e-07	-0.356559	3.7397e-09	0.750201	sp.Q9UNS2.CSN3_HUMAN	0.425325	0.0559332	0.0621959	-0.0902691	0.0465062	0.146202	Scaling	Scaling	Buffering	Buffering
1716	COPS4	COPS4	0.784387	-0.0430619	2.43855e-08	-0.315434	0.102443	0.272372	sp.Q9BT78.CSN4_HUMAN	0.575473	-0.0817211	0.00986971	-0.111459	0.836947	0.0297376	Buffering	Scaling	Buffering	Buffering
1717	COPS5	COPS5	3.38175e-09	0.353386	2.23777e-05	-0.387069	4.77601e-12	0.740455	sp.Q92905.CSN5_HUMAN	0.319773	-0.0508658	0.0481069	-0.127874	0.29053	0.0770079	Scaling	Scaling	Buffering	Buffering
1718	COPS6	COPS6	5.15784e-08	0.373468	0.0283163	-0.249009	8.15874e-07	0.622477	sp.Q7L5N1.CSN6_HUMAN	0.361498	0.0421533	0.162137	-0.0862479	0.049349	0.128401	Scaling	Buffering	Buffering	Buffering
1719	COPS7A	COPS7A	1.14261e-08	0.447204	5.10087e-05	-0.30413	2.26664e-14	0.751334	sp.Q9UBW8.CSN7A_HUMAN	0.345617	0.0759987	0.233233	0.088583	0.889689	-0.0125843	Scaling	Scaling	Buffering	Buffering
1720	COPS7B	COPS7B	0.00726302	0.210911	0.00395079	-0.210279	2.57453e-05	0.42119	sp.Q9H9Q2.CSN7B_HUMAN	3.73706e-06	0.353373	0.0304984	-0.144123	1.14656e-07	0.497496	Buffering	Buffering	Scaling	Buffering
1721	COPS8	COPS8	3.78071e-05	0.363764	0.537165	-0.0581379	0.000257817	0.421902	sp.Q99627.CSN8_HUMAN	0.763549	0.0228684	0.0859176	-0.0875014	0.190694	0.11037	Scaling	Buffering	Buffering	Buffering
1722	COPZ1	COPZ1	0.132769	0.151064	0.0512059	-0.148311	0.0119415	0.299375	sp.P61923.COPZ1_HUMAN	0.614627	0.0485753	0.296664	-0.0728323	0.272731	0.121408	Buffering	Buffering	Buffering	Buffering
1723	COPZ2	COPZ2	0.85738	-0.0502162	0.409535	-0.2376	0.605712	0.187384	sp.Q9P299.COPZ2_HUMAN	0.952841	0.0264276	0.356479	-0.213029	0.612282	0.239456	Buffering	Buffering	Buffering	Buffering
1724	COQ10A	COQ10A	0.617626	-0.0862014	0.153795	-0.15257	0.725356	0.0663682	sp.Q96MF6.CQ10A_HUMAN	0.227562	0.234648	0.550276	0.0753565	0.459281	0.159292	Buffering	Buffering	Buffering	Buffering
1725	COQ10B	COQ10B	1.72158e-05	0.446273	0.0357899	-0.179931	4.80086e-07	0.626204	sp.Q9H8M1.CQ10B_HUMAN	0.0352315	0.279361	0.214019	-0.133865	0.00788003	0.413226	Scaling	Buffering	Scaling	Buffering
1726	COQ3	COQ3	0.804879	0.0382483	1.76369e-06	-0.349076	0.0197875	0.387324	sp.Q9NZJ6.COQ3_HUMAN	0.322344	0.136645	0.0185342	-0.193934	0.0242287	0.330579	Buffering	Scaling	Buffering	Buffering
1727	COQ4	COQ4	0.000391632	0.25391	1.99641e-06	-0.322194	4.02748e-10	0.576104	sp.Q9Y3A0.COQ4_HUMAN	0.281322	-0.189976	0.134747	-0.221515	0.874836	0.0315388	Scaling	Scaling	Anti-Scaling	Buffering
1728	COQ5	COQ5	0.0738734	0.213772	0.00233969	-0.241658	0.00107489	0.45543	sp.Q5HYK3.COQ5_HUMAN	0.017112	0.292903	0.687594	-0.0346783	0.017696	0.327581	Buffering	Buffering	Scaling	Buffering
1729	COQ6	COQ6	0.000239235	0.373821	3.43354e-08	-0.361955	5.42582e-10	0.735776	sp.Q9Y2Z9.COQ6_HUMAN	0.0344537	0.20776	0.00526959	-0.190579	0.000284316	0.398338	Scaling	Scaling	Buffering	Buffering
1730	COQ7	COQ7	7.59747e-07	0.496915	1.89547e-06	-0.298609	9.17225e-12	0.795524	sp.Q99807.COQ7_HUMAN	0.65114	0.0574377	0.00108417	-0.249104	0.0221697	0.306542	Scaling	Scaling	Buffering	Buffering
1731	COQ9	COQ9	0.000146174	0.37248	2.11842e-11	-0.438751	1.5406e-11	0.811231	sp.O75208.COQ9_HUMAN	0.241049	0.118523	0.000492039	-0.273472	0.000574059	0.391996	Scaling	Scaling	Buffering	Scaling
1732	CORO1A	CORO1A	0.669022	0.184617	0.0301568	-0.51194	0.117939	0.696557	sp.P31146.COR1A_HUMAN	0.480587	0.206159	0.0247552	-0.372163	0.0566589	0.578322	Buffering	Scaling	Buffering	Scaling
1733	CORO1B	CORO1B	0.276972	0.197106	0.395086	0.102238	0.634685	0.0948676	sp.Q9BR76.COR1B_HUMAN	0.100481	0.181041	0.542243	0.0530119	0.307062	0.128029	Buffering	Anti-Scaling	Buffering	Buffering
1734	CORO1C	CORO1C	0.901691	0.0206751	0.19173	-0.187567	0.309364	0.208242	sp.Q9ULV4.3.COR1C_HUMAN	0.171406	0.21136	0.665451	-0.0441939	0.147045	0.255554	Buffering	Buffering	Buffering	Buffering
1735	CORO2A	CORO2A	0.0191321	0.57897	0.053638	-0.303142	0.000782353	0.882111	sp.Q92828.COR2A_HUMAN	0.0216502	0.435515	0.0907552	-0.215126	0.00156725	0.650641	Scaling	Scaling	Scaling	Buffering
1736	CORO2B	CORO2B	0.78418	0.0850248	0.611674	-0.0667416	0.631201	0.151766	sp.Q9UQ03.COR2B_HUMAN	0.679299	0.176199	0.270528	-0.200924	0.39491	0.377123	Buffering	Buffering	Buffering	Buffering
1737	CORO6	CORO6	0.613447	0.0998233	0.696593	-0.0783319	0.482331	0.178155	sp.Q6QEF8.5.CORO6_HUMAN	0.0706539	-0.365634	0.656363	-0.0969147	0.284687	-0.26872	Buffering	Buffering	Anti-Scaling	Buffering
1738	CORO7	CORO7	0.00237387	0.605501	1.65574e-05	-0.441047	2.85792e-06	1.04655	sp.P57737.3.CORO7_HUMAN	0.00197518	0.545524	7.32577e-05	-0.313545	7.38475e-06	0.859068	Scaling	Scaling	Scaling	Scaling
1739	CORO7	CORO7	0.00237387	0.605501	1.65574e-05	-0.441047	2.85792e-06	1.04655	sp.P57737.CORO7_HUMAN	0.0256248	0.850943	0.0291023	-0.45128	0.00171259	1.30222	Scaling	Scaling	Scaling	Scaling
1740	COTL1	COTL1	0.0767758	0.577111	0.654934	-0.0864549	0.0501856	0.663566	sp.Q14019.COTL1_HUMAN	0.115837	0.332811	0.171472	-0.188847	0.0231135	0.521657	Scaling	Buffering	Scaling	Buffering
1741	COX11	COX11	0.00205241	0.301168	0.147332	-0.163028	0.000956477	0.464196	sp.Q9Y6N1.COX11_HUMAN	0.00142114	0.343229	0.756956	-0.0319688	0.00642353	0.375198	Scaling	Buffering	Scaling	Buffering
1742	COX14	COX14	0.0173377	0.276529	0.0100123	-0.20648	0.000370622	0.483009	sp.Q96I36.COX14_HUMAN	0.264749	0.155011	0.873352	0.0147657	0.348757	0.140245	Scaling	Buffering	Buffering	Buffering
1743	COX15	COX15	0.000374104	0.366646	1.25702e-18	-0.510094	1.60699e-10	0.87674	sp.Q7KZN9.COX15_HUMAN	0.0788554	0.289957	0.000137448	-0.269239	0.0020795	0.559196	Scaling	Scaling	Scaling	Scaling
1744	COX16	COX16	0.0010396	0.370761	0.000178389	-0.259223	5.70762e-07	0.629984	sp.Q9P0S2.COX16_HUMAN	0.00719197	0.38143	0.0014015	-0.29687	2.11801e-05	0.6783	Scaling	Scaling	Scaling	Scaling
1745	COX17	COX17	0.000206078	0.357606	0.0159334	-0.325465	1.92126e-05	0.683071	sp.Q14061.COX17_HUMAN	9.174e-05	0.460724	0.0133106	-0.363195	3.18313e-06	0.82392	Scaling	Scaling	Scaling	Scaling
1746	COX18	COX18	0.928451	0.0178632	4.60117e-13	-0.422688	0.0442472	0.440552	sp.Q8N8Q8.COX18_HUMAN	0.246449	0.276215	0.0560681	-0.125247	0.102294	0.401463	Buffering	Scaling	Scaling	Buffering
1747	COX19	COX19	4.12969e-10	0.368632	9.01335e-08	-0.555032	1.63662e-14	0.923664	sp.Q49B96.COX19_HUMAN	0.566675	0.0434281	0.0638385	-0.218162	0.0297486	0.26159	Scaling	Scaling	Buffering	Buffering
1748	COX20	COX20	0.00728989	0.227841	0.457034	-0.112529	0.0384189	0.34037	sp.Q5RI15.2.COX20_HUMAN	0.0446798	0.172114	0.028541	0.24072	0.573538	-0.0686053	Buffering	Buffering	Buffering	Anti-Scaling
1749	COX4I1	COX4I1	0.000136037	0.278965	2.49004e-08	-0.33553	2.60336e-11	0.614495	sp.P13073.COX41_HUMAN	0.631868	0.0287316	0.279678	-0.0499928	0.219011	0.0787244	Scaling	Scaling	Buffering	Buffering
1750	COX5A	COX5A	0.000201571	0.385832	3.85354e-07	-0.347264	5.49064e-09	0.733097	sp.P20674.COX5A_HUMAN	0.909882	0.0130106	0.271508	-0.0680135	0.495846	0.0810241	Scaling	Scaling	Buffering	Buffering
1751	COX5B	COX5B	0.0200697	0.201867	0.00107316	-0.297971	2.64728e-05	0.499838	sp.P10606.COX5B_HUMAN	0.201439	-0.135786	0.123771	-0.11533	0.863345	-0.020456	Buffering	Scaling	Anti-Scaling	Buffering
1752	COX6A1	COX6A1	0.000287581	0.460647	0.00309573	-0.200656	3.14466e-06	0.661303	sp.P12074.CX6A1_HUMAN	0.827769	0.0239882	0.939192	0.00668104	0.893245	0.0173072	Scaling	Buffering	Buffering	Buffering
1753	COX6B1	COX6B1	1.10157e-08	0.446802	0.049801	-0.141069	1.29514e-09	0.587872	sp.P14854.CX6B1_HUMAN	0.107179	0.139365	0.514984	-0.0542146	0.062637	0.19358	Scaling	Buffering	Buffering	Buffering
1754	COX6C	COX6C	1.70629e-09	0.532673	7.87149e-06	-0.437503	8.88077e-15	0.970177	sp.P09669.COX6C_HUMAN	0.777744	0.0202974	0.0992649	-0.133733	0.0998079	0.15403	Scaling	Scaling	Buffering	Buffering
1755	COX7A2	COX7A2	0.0418953	0.234391	7.57932e-05	-0.283385	0.000102574	0.517776	sp.P14406.CX7A2_HUMAN	0.592728	-0.08057	0.575962	-0.0329952	0.754164	-0.0475748	Buffering	Scaling	Buffering	Buffering
1756	COX7A2L	COX7A2L	1.05454e-05	0.319388	0.000169503	-0.260423	1.01359e-09	0.579812	sp.O14548.COX7R_HUMAN	0.552032	0.0568132	0.192822	0.116771	0.609619	-0.0599576	Scaling	Scaling	Buffering	Anti-Scaling
1757	COX7C	COX7C	7.4245e-07	0.536296	1.14532e-09	-0.393722	3.79691e-13	0.930017	sp.P15954.COX7C_HUMAN	0.28457	0.111266	0.255103	-0.0783872	0.0994295	0.189653	Scaling	Scaling	Buffering	Buffering
1758	CP	CP	0.33711	0.286467	0.0961123	-0.496568	0.0377585	0.783035	sp.P00450.CERU_HUMAN	0.699815	0.106432	0.00344923	-0.846437	0.0102114	0.952869	Scaling	Scaling	Buffering	Scaling
1759	CPA4	CPA4	0.266849	0.296668	0.00400014	1.24024	0.0339421	-0.943569	sp.Q9UI42.CBPA4_HUMAN	0.902742	-0.031927	0.0742226	0.68908	0.0711995	-0.721007	Scaling	Anti-Scaling	Buffering	Anti-Scaling
1760	CPD	CPD	0.0327166	0.274764	0.141781	-0.215384	0.0051361	0.490148	sp.O75976.CBPD_HUMAN	0.0423738	0.208196	0.0926396	-0.219982	0.00526979	0.428178	Scaling	Buffering	Buffering	Buffering
1761	CPEB4	CPEB4	0.0128063	0.44538	0.00609437	0.339947	0.58455	0.105433	sp.Q17RY0.CPEB4_HUMAN	0.0199639	0.301573	0.163021	0.128627	0.218866	0.172946	Scaling	Anti-Scaling	Scaling	Anti-Scaling
1762	CPLX2	CPLX2	0.609524	-0.142646	0.68521	-0.085714	0.855898	-0.0569316	sp.Q6PUV4.CPLX2_HUMAN	0.959211	0.0403007	0.449613	-0.314288	0.675821	0.354589	Anti-Scaling	Buffering	Buffering	Scaling
1763	CPM	CPM	0.639599	0.144811	0.107059	0.406209	0.478677	-0.261398	sp.P14384.CBPM_HUMAN	0.523173	0.223994	0.298963	0.210153	0.970707	0.013841	Buffering	Anti-Scaling	Buffering	Anti-Scaling
1764	CPNE1	CPNE1	4.59868e-14	0.615116	0.935276	-0.0206103	0.0197333	0.635726	sp.Q99829.CPNE1_HUMAN	0.000149828	0.362997	0.258676	0.29737	0.802584	0.0656274	Scaling	Buffering	Scaling	Anti-Scaling
1765	CPNE2	CPNE2	0.175682	0.257286	0.0169846	-0.316748	0.00593043	0.574034	sp.Q96FN4.CPNE2_HUMAN	0.520275	0.095465	0.000337206	-0.299831	0.0115371	0.395296	Scaling	Scaling	Buffering	Scaling
1766	CPNE3	CPNE3	5.40023e-05	0.381313	2.29641e-05	-0.544752	8.76502e-10	0.926065	sp.O75131.CPNE3_HUMAN	0.00228972	0.234691	0.000700792	-0.398756	1.1745e-06	0.633447	Scaling	Scaling	Buffering	Scaling
1767	CPNE5	CPNE5	0.449807	0.122125	0.0202807	-0.202979	0.0428406	0.325104	sp.Q9HCH3.CPNE5_HUMAN	0.020537	0.414624	0.412689	0.129264	0.182904	0.28536	Buffering	Buffering	Scaling	Anti-Scaling
1768	CPNE7	CPNE7	0.521608	-0.233223	0.0563152	-0.443518	0.591397	0.210295	sp.Q9UBL6.CPNE7_HUMAN	0.307531	-0.175959	0.190955	-0.158251	0.922895	-0.0177079	Anti-Scaling	Scaling	Anti-Scaling	Buffering
1769	CPNE8	CPNE8	0.856681	0.0522701	0.937866	0.0156438	0.909698	0.0366262	sp.Q86YQ8.CPNE8_HUMAN	0.807086	-0.0719974	0.972555	0.00629844	0.809398	-0.0782959	Buffering	Buffering	Buffering	Buffering
1770	CPOX	CPOX	0.479545	-0.0702973	0.287087	-0.169935	0.560908	0.0996381	sp.P36551.HEM6_HUMAN	0.332505	0.0892722	0.416935	-0.114025	0.185838	0.203297	Buffering	Buffering	Buffering	Buffering
1771	CPPED1	CPPED1	0.000543212	0.953859	0.920319	0.0151784	0.00101664	0.93868	sp.Q9BRF8.CPPED_HUMAN	0.000630012	0.996271	0.414859	-0.122828	0.000267226	1.1191	Scaling	Buffering	Scaling	Buffering
1772	CPQ	CPQ	0.363938	0.176992	0.00765984	-0.693982	0.00224023	0.870974	sp.Q9Y646.CBPQ_HUMAN	0.69292	0.0788335	0.372058	-0.219549	0.285912	0.298382	Buffering	Scaling	Buffering	Buffering
1773	CPS1	CPS1	0.0772242	0.554918	0.869287	-0.0450671	0.112755	0.599985	sp.P31327.3.CPSM_HUMAN	0.337986	0.22437	0.72503	0.0720573	0.594017	0.152312	Scaling	Buffering	Buffering	Buffering
1774	CPSF1	CPSF1	0.000312558	0.294125	0.00780368	-0.309897	5.66278e-06	0.604022	sp.Q10570.CPSF1_HUMAN	0.950101	0.00267163	0.910439	0.007406	0.945848	-0.00473436	Scaling	Scaling	Buffering	Buffering
1775	CPSF2	CPSF2	0.000177252	0.37157	3.73433e-09	-0.451151	1.62722e-11	0.822721	sp.Q9P2I0.CPSF2_HUMAN	0.582087	0.0368536	4.4857e-05	-0.218082	0.000846473	0.254935	Scaling	Scaling	Buffering	Buffering
1776	CPSF3	CPSF3	0.00486361	0.212096	1.3088e-05	-0.427416	5.15444e-08	0.639512	sp.Q9UKF6.CPSF3_HUMAN	0.246643	0.0644101	0.00810595	-0.149702	0.00315556	0.214112	Buffering	Scaling	Buffering	Buffering
1777	CPSF4	CPSF4	4.32021e-08	0.350026	0.00421826	-0.263571	2.53659e-09	0.613597	sp.O95639.CPSF4_HUMAN	0.12723	-0.0968027	0.274127	-0.0894416	0.935205	-0.0073611	Scaling	Scaling	Buffering	Buffering
1778	CPSF6	CPSF6	0.331842	-0.0954243	0.280459	-0.0553057	0.699633	-0.0401186	sp.Q16630.2.CPSF6_HUMAN	0.256101	0.0984356	0.345565	0.0610188	0.707577	0.0374168	Buffering	Buffering	Buffering	Buffering
1779	CPSF7	CPSF7	0.600405	0.0407688	0.0268117	-0.163741	0.0290433	0.20451	sp.Q8N684.3.CPSF7_HUMAN	0.622122	0.035145	0.602294	-0.0331702	0.403887	0.0683152	Buffering	Buffering	Buffering	Buffering
1780	CPT1A	CPT1A	0.641163	0.0807336	0.760717	-0.0513737	0.5247	0.132107	sp.P50416.CPT1A_HUMAN	0.35145	0.12975	0.800294	-0.0329894	0.314794	0.162739	Buffering	Buffering	Buffering	Buffering
1781	CPT1C	CPT1C	0.944921	-0.0181589	0.0897446	-0.348913	0.239393	0.330754	sp.Q8TCG5.CPT1C_HUMAN	0.900777	0.033417	0.102741	0.371378	0.156829	-0.33796	Buffering	Scaling	Buffering	Anti-Scaling
1782	CPT2	CPT2	0.00845846	0.236792	0.00533309	-0.224844	2.02268e-05	0.461637	sp.P23786.CPT2_HUMAN	0.0506218	0.25029	0.928912	-0.00702766	0.0644722	0.257318	Buffering	Buffering	Scaling	Buffering
1783	CPVL	CPVL	0.244541	0.284378	0.345838	0.352843	0.861283	-0.0684641	sp.Q9H3G5.CPVL_HUMAN	0.413063	0.157318	0.976485	-0.00796019	0.554894	0.165278	Scaling	Anti-Scaling	Buffering	Buffering
1784	CRABP1	CRABP1	0.718984	0.163185	0.761309	0.0578776	0.822593	0.105308	sp.P29762.RABP1_HUMAN	0.798528	-0.0953048	0.601513	-0.0984539	0.993518	0.00314904	Buffering	Buffering	Buffering	Buffering
1785	CRABP2	CRABP2	0.156973	0.531216	0.944069	0.0313593	0.342098	0.499857	sp.P29373.RABP2_HUMAN	0.274603	0.255518	0.929783	-0.0209682	0.353329	0.276486	Scaling	Buffering	Scaling	Buffering
1786	CRADD	CRADD	0.00253316	0.361378	1.00752e-05	-0.415791	8.75111e-08	0.777169	sp.P78560.CRADD_HUMAN	0.0577418	0.2628	0.00167077	-0.463488	0.000152089	0.726288	Scaling	Scaling	Scaling	Scaling
1787	CRAT	CRAT	0.232497	0.308057	0.12321	-0.255968	0.0414779	0.564025	sp.P43155.CACP_HUMAN	0.267074	0.228959	0.413171	-0.11097	0.127474	0.339929	Scaling	Scaling	Buffering	Buffering
1788	CRBN	CRBN	0.0124995	0.273193	3.23354e-14	-0.475366	2.09827e-07	0.748559	sp.Q96SW2.CRBN_HUMAN	0.00203605	0.554846	1.56516e-06	-0.366358	1.05922e-05	0.921204	Scaling	Scaling	Scaling	Scaling
1789	CRCP	CRCP	4.5935e-09	0.328009	0.261922	-0.0892132	2.08598e-06	0.417222	sp.O75575.RPC9_HUMAN	0.252779	0.0849953	0.289302	-0.0907807	0.0577149	0.175776	Scaling	Buffering	Buffering	Buffering
1790	CREB1	CREB1	0.0444309	0.168673	0.271127	-0.0812474	0.0134846	0.24992	sp.P16220.CREB1_HUMAN	0.0938312	-0.190431	0.250662	-0.0975784	0.460696	-0.0928528	Buffering	Buffering	Anti-Scaling	Buffering
1791	CREB3L2	CREB3L2	5.79346e-05	0.504753	0.830553	0.0347736	0.0099446	0.46998	sp.Q70SY1.CR3L2_HUMAN	0.976225	0.00761662	0.14769	-0.264513	0.33574	0.27213	Scaling	Buffering	Buffering	Scaling
1792	CREB5	CREB5	0.00419704	0.473914	0.170371	0.329903	0.565032	0.14401	sp.Q02930.CREB5_HUMAN	0.395558	0.0888018	0.969875	0.00690744	0.655337	0.0818944	Scaling	Anti-Scaling	Buffering	Buffering
1793	CREBBP	CREBBP	0.0400417	0.273398	4.12959e-07	-0.418211	8.20192e-06	0.691609	sp.Q92793.CBP_HUMAN	0.0555647	0.136015	0.00738038	-0.118642	0.000742055	0.254657	Scaling	Scaling	Buffering	Buffering
1794	CREBZF	CREBZF	0.00470443	0.223758	3.04235e-07	-0.498796	4.1799e-10	0.722555	sp.Q9NS37.ZHANG_HUMAN	0.753058	-0.0575273	0.302001	-0.2019	0.517784	0.144373	Buffering	Scaling	Buffering	Buffering
1795	CREG1	CREG1	0.00604044	0.440892	0.00593254	-0.637496	5.3315e-05	1.07839	sp.O75629.CREG1_HUMAN	0.329528	0.109359	0.00544442	-0.41975	0.00185328	0.529109	Scaling	Scaling	Buffering	Scaling
1796	CRELD1	CRELD1	0.151082	0.253058	1.4195e-05	-0.398242	0.00122495	0.6513	sp.Q96HD1.CREL1_HUMAN	0.360849	0.27962	0.811072	-0.0247452	0.318951	0.304365	Scaling	Scaling	Scaling	Buffering
1797	CRELD2	CRELD2	0.0146355	0.624109	9.60826e-11	-0.594532	2.99757e-05	1.21864	sp.Q6UXH1.5.CREL2_HUMAN	0.022261	0.53093	1.18609e-07	-0.452386	0.000142554	0.983316	Scaling	Scaling	Scaling	Scaling
1798	CRIM1	CRIM1	0.00557621	0.761917	0.121542	0.466984	0.415755	0.294933	sp.Q9NZV1.CRIM1_HUMAN	0.284661	0.224663	0.679585	0.0826517	0.594915	0.142011	Scaling	Anti-Scaling	Buffering	Buffering
1799	CRIP1	CRIP1	0.0216075	1.25489	0.0676723	-0.726554	0.00120125	1.98145	sp.P50238.CRIP1_HUMAN	0.209498	0.38367	0.37902	-0.224151	0.0782935	0.607821	Scaling	Scaling	Scaling	Buffering
1800	CRIP2	CRIP2	0.139501	0.571292	0.926566	0.0279976	0.208504	0.543295	sp.P52943.CRIP2_HUMAN	0.133836	0.351761	0.698627	0.0683699	0.269477	0.283391	Scaling	Buffering	Scaling	Buffering
1801	CRIPT	CRIPT	4.40853e-06	0.318837	0.170194	-0.112021	1.78476e-05	0.430858	sp.Q9P021.CRIPT_HUMAN	0.159718	0.184472	0.174936	-0.160287	0.0297361	0.344759	Scaling	Buffering	Buffering	Buffering
1802	CRK	CRK	0.00402383	0.311281	1.65766e-07	-0.369956	3.463e-08	0.681237	sp.P46108.CRK_HUMAN	0.0361749	0.264147	0.000802155	-0.257634	0.000132336	0.521781	Scaling	Scaling	Scaling	Scaling
1803	CRKL	CRKL	0.00135064	0.535133	0.0084835	-0.222539	4.19255e-05	0.757672	sp.P46109.CRKL_HUMAN	0.273583	0.232478	0.0438101	-0.179358	0.0655234	0.411836	Scaling	Buffering	Buffering	Buffering
1804	CRLF3	CRLF3	0.341952	0.0872326	0.000517249	-0.335919	0.000534075	0.423152	sp.Q8IUI8.CRLF3_HUMAN	0.411164	0.086816	0.0523081	-0.230319	0.0276005	0.317135	Buffering	Scaling	Buffering	Buffering
1805	CRMP1	CRMP1	0.848051	-0.0965784	0.0229297	-0.435352	0.504392	0.338773	sp.Q14194.2.DPYL1_HUMAN	0.973579	-0.011809	0.197507	-0.177169	0.644897	0.16536	Buffering	Scaling	Buffering	Buffering
1806	CRNKL1	CRNKL1	4.3257e-15	0.484824	9.39709e-07	-0.331345	1.1529e-22	0.816169	sp.Q9BZJ0.CRNL1_HUMAN	0.000912549	0.196836	0.00224625	-0.173662	2.25019e-08	0.370498	Scaling	Scaling	Buffering	Buffering
1807	CROCC	CROCC	0.0164169	0.375425	0.117876	-0.160236	0.00248044	0.535661	sp.Q5TZA2.CROCC_HUMAN	0.00786869	0.31552	0.947911	0.00374706	0.010745	0.311773	Scaling	Buffering	Scaling	Buffering
1808	CROT	CROT	0.000330097	0.439503	0.479436	0.091376	0.015279	0.348127	sp.Q9UKG9.OCTC_HUMAN	0.00134213	0.358071	0.088109	0.234221	0.377817	0.12385	Scaling	Buffering	Scaling	Anti-Scaling
1809	CRTAP	CRTAP	0.334199	0.306268	8.29968e-06	-0.528532	0.0149014	0.8348	sp.O75718.CRTAP_HUMAN	0.3046	0.335871	0.85161	0.0203662	0.332462	0.315505	Scaling	Scaling	Scaling	Buffering
1810	CRTC1	CRTC1	8.22075e-06	0.679936	0.000659862	-0.248831	4.27674e-08	0.928768	sp.Q6UUV9.CRTC1_HUMAN	0.690987	0.118963	0.000263026	-0.398626	0.0972516	0.517589	Scaling	Buffering	Buffering	Scaling
1811	CRTC2	CRTC2	0.000674232	0.214055	0.0302452	-0.223044	0.00016313	0.437099	sp.Q53ET0.CRTC2_HUMAN	0.00143808	0.334419	0.0139193	-0.310948	1.90585e-05	0.645366	Buffering	Buffering	Scaling	Scaling
1812	CRTC3	CRTC3	0.668677	0.09046	0.000253685	-0.302643	0.0763186	0.393103	sp.Q6UUV7.CRTC3_HUMAN	0.0603127	-0.437286	0.00631008	-0.291487	0.523154	-0.145799	Buffering	Scaling	Anti-Scaling	Scaling
1813	CRY1	CRY1	0.0601388	0.23642	0.752567	-0.0384264	0.0714732	0.274846	sp.Q16526.CRY1_HUMAN	0.0369991	0.448788	0.58558	0.0938807	0.101817	0.354908	Buffering	Buffering	Scaling	Buffering
1814	CRYAB	CRYAB	0.310314	-0.381979	0.480595	0.217851	0.148149	-0.59983	sp.P02511.CRYAB_HUMAN	0.36229	-0.210748	0.831764	-0.0503068	0.55494	-0.160441	Anti-Scaling	Anti-Scaling	Anti-Scaling	Buffering
1815	CRYBG3	CRYBG3	0.0807005	0.214277	0.855094	0.0242321	0.246989	0.190045	sp.Q68DQ2.CRBG3_HUMAN	0.749344	0.0504659	0.466852	0.148075	0.682937	-0.0976092	Buffering	Buffering	Buffering	Anti-Scaling
1816	CRYBG3	CRYBG3	0.0807005	0.214277	0.855094	0.0242321	0.246989	0.190045	tr.B4DLE8.B4DLE8_HUMAN	0.10172	0.180735	0.279123	-0.162612	0.0482472	0.343347	Buffering	Buffering	Buffering	Buffering
1817	CRYL1	CRYL1	0.0291047	0.666833	0.000497323	-0.462496	0.000427221	1.12933	sp.Q9Y2S2.2.CRYL1_HUMAN	0.0461474	0.542208	0.000271482	-0.414511	0.000731775	0.956719	Scaling	Scaling	Scaling	Scaling
1818	CRYM	CRYM	0.0508062	0.61583	0.641037	-0.0629664	0.0379867	0.678796	sp.Q14894.CRYM_HUMAN	0.236199	0.499718	0.52292	0.158442	0.445322	0.341276	Scaling	Buffering	Scaling	Anti-Scaling
1819	CRYZ	CRYZ	0.0239741	0.362765	8.5058e-06	-0.568184	9.06785e-07	0.93095	sp.Q08257.QOR_HUMAN	0.317485	0.136762	0.0132059	-0.255796	0.0121004	0.392557	Scaling	Scaling	Buffering	Scaling
1820	CRYZL1	CRYZL1	0.000716083	0.406284	7.21187e-13	-0.475403	9.5799e-10	0.881687	sp.O95825.QORL1_HUMAN	0.00245379	0.313508	0.00512225	-0.174054	1.60402e-05	0.487562	Scaling	Scaling	Scaling	Buffering
1821	CS	CS	0.350894	0.107887	0.0376449	-0.16157	0.04331	0.269457	sp.O75390.CISY_HUMAN	0.0167113	0.17925	0.349431	-0.0544403	0.00676126	0.23369	Buffering	Buffering	Buffering	Buffering
1822	CSDE1	CSDE1	3.67458e-06	0.484514	0.244486	-0.122971	8.66855e-06	0.607484	sp.O75534.3.CSDE1_HUMAN	0.760327	0.0265453	0.00939381	-0.154421	0.0648602	0.180966	Scaling	Buffering	Buffering	Buffering
1823	CSDE1	CSDE1	3.67458e-06	0.484514	0.244486	-0.122971	8.66855e-06	0.607484	sp.O75534.CSDE1_HUMAN	0.106841	-0.307163	0.154765	0.195392	0.0186514	-0.502555	Scaling	Buffering	Anti-Scaling	Anti-Scaling
1824	CSE1L	CSE1L	1.26258e-12	0.502184	0.802644	-0.0526427	0.0146422	0.554827	sp.P55060.XPO2_HUMAN	0.000901651	0.218107	0.174824	-0.204698	0.0095293	0.422805	Scaling	Buffering	Buffering	Buffering
1825	CSF1	CSF1	0.850689	0.0626973	0.029888	-0.483483	0.134503	0.546181	sp.P09603.CSF1_HUMAN	0.380323	0.298677	0.266752	-0.228004	0.152091	0.526681	Buffering	Scaling	Scaling	Buffering
1826	CSGALNACT2	CSGALNACT2	0.0116199	0.505456	0.0606632	-0.185182	0.00145	0.690639	sp.Q8N6G5.CGAT2_HUMAN	0.022983	0.35076	0.17478	-0.136884	0.00394017	0.487645	Scaling	Buffering	Scaling	Buffering
1827	CSK	CSK	0.0760885	0.246145	1.36282e-09	-0.607914	8.19869e-07	0.854059	sp.P41240.CSK_HUMAN	0.0475346	0.307755	2.01272e-05	-0.402552	6.31951e-05	0.710307	Buffering	Scaling	Scaling	Scaling
1828	CSNK1A1	CSNK1A1	4.21914e-07	0.4643	0.0277745	-0.146596	4.17911e-09	0.610897	tr.Q71TU5.Q71TU5_HUMAN	0.856109	0.0661289	0.538926	0.121018	0.889796	-0.0548891	Scaling	Buffering	Buffering	Anti-Scaling
1829	CSNK1A1	CSNK1A1	4.21914e-07	0.4643	0.0277745	-0.146596	4.17911e-09	0.610897	sp.P48729.2.KC1A_HUMAN	0.6814	0.0365871	0.431668	0.0698311	0.764206	-0.033244	Scaling	Buffering	Buffering	Buffering
1830	CSNK1D	CSNK1D	6.35179e-06	0.34527	0.394071	-0.0587167	1.50947e-05	0.403986	sp.P48730.KC1D_HUMAN	0.445409	-0.071138	0.0607926	-0.175419	0.385184	0.104281	Scaling	Buffering	Buffering	Buffering
1831	CSNK1E	CSNK1E	1.80347e-05	0.449152	2.1502e-10	-0.459996	4.36689e-12	0.909149	sp.P49674.KC1E_HUMAN	0.289355	0.106553	0.216264	-0.0727231	0.0833581	0.179276	Scaling	Scaling	Buffering	Buffering
1832	CSNK1G1	CSNK1G1	0.000775671	0.42336	4.78228e-07	-0.311864	6.50209e-07	0.735224	tr.U3KQB3.U3KQB3_HUMAN	0.0223153	0.433756	0.775099	0.02255	0.0330324	0.411206	Scaling	Scaling	Scaling	Buffering
1833	CSNK1G3	CSNK1G3	1.78815e-05	0.351734	1.78306e-06	-0.367776	1.4791e-11	0.71951	sp.Q9Y6M4.KC1G3_HUMAN	0.204636	0.103156	0.259417	-0.0733618	0.0581677	0.176518	Scaling	Scaling	Buffering	Buffering
1834	CSNK2A1	CSNK2A1	5.72269e-07	0.338845	2.7487e-11	-0.549915	1.88798e-20	0.88876	sp.P68400.CSK21_HUMAN	0.00100664	0.157439	5.45853e-05	-0.190241	6.91505e-10	0.347679	Scaling	Scaling	Buffering	Buffering
1835	CSNK2A2	CSNK2A2	2.39117e-05	0.334459	7.86112e-10	-0.452467	1.00604e-13	0.786925	sp.P19784.CSK22_HUMAN	0.000922687	0.253479	0.00218637	-0.183324	1.13443e-06	0.436802	Scaling	Scaling	Scaling	Buffering
1836	CSNK2B	CSNK2B	0.000106186	0.318843	1.38246e-06	-0.35869	2.57603e-10	0.677533	sp.P67870.CSK2B_HUMAN	0.548869	-0.042063	0.0563457	-0.0933399	0.514614	0.0512769	Scaling	Scaling	Buffering	Buffering
1837	CSPG4	CSPG4	0.555754	-0.219214	0.964966	-0.00956804	0.597431	-0.209645	sp.Q6UVK1.CSPG4_HUMAN	0.806944	-0.0734735	0.452808	0.123028	0.535035	-0.196501	Anti-Scaling	Buffering	Buffering	Anti-Scaling
1838	CSPP1	CSPP1	0.00101446	0.23932	6.78392e-05	-0.408915	2.89303e-08	0.648235	sp.Q1MSJ5.CSPP1_HUMAN	0.292512	0.0979744	0.0651533	-0.217627	0.0177626	0.315602	Buffering	Scaling	Buffering	Buffering
1839	CSRP1	CSRP1	0.769579	-0.0639561	0.529036	0.137432	0.473221	-0.201388	sp.P21291.CSRP1_HUMAN	0.449224	0.114063	0.623643	0.0836887	0.882275	0.0303748	Buffering	Anti-Scaling	Buffering	Buffering
1840	CSRP2	CSRP2	0.385401	0.312483	0.842301	-0.0535982	0.376623	0.366081	sp.Q16527.CSRP2_HUMAN	0.182929	0.365284	0.183321	0.307248	0.856854	0.0580357	Scaling	Buffering	Scaling	Anti-Scaling
1841	CSRP3	CSRP3	0.661621	-0.0262494	0.895571	-0.00917059	0.81459	-0.0170788	sp.P50461.CSRP3_HUMAN	0.585087	-0.11365	0.713155	-0.0662518	0.837455	-0.047398	Buffering	Buffering	Anti-Scaling	Buffering
1842	CST1	CST1	0.0745072	0.446709	0.511864	0.141181	0.286515	0.305529	sp.P01037.CYTN_HUMAN	0.306516	0.536508	0.19649	0.894858	0.639813	-0.35835	Scaling	Anti-Scaling	Scaling	Anti-Scaling
1843	CST3	CST3	2.578e-08	1.07221	0.759016	0.0605315	1.23854e-06	1.01168	sp.P01034.CYTC_HUMAN	2.66766e-07	0.701979	0.535572	0.100056	0.000740367	0.601924	Scaling	Buffering	Scaling	Anti-Scaling
1844	CST4	CST4	0.111252	0.214762	0.844569	0.0159908	0.159029	0.198771	sp.P01036.CYTS_HUMAN	0.0207291	1.14207	0.248292	0.599112	0.298532	0.542958	Buffering	Buffering	Scaling	Anti-Scaling
1845	CST6	CST6	0.0132735	1.10106	0.866177	-0.0491266	0.0156206	1.15019	sp.Q15828.CYTM_HUMAN	0.0434881	1.294	0.281558	0.428997	0.189735	0.865003	Scaling	Buffering	Scaling	Anti-Scaling
1846	CST7	CST7	0.963408	-0.00983742	0.608688	-0.0934419	0.70731	0.0836044	sp.O76096.CYTF_HUMAN	0.963934	-0.0208306	0.521255	0.282016	0.539894	-0.302847	Buffering	Buffering	Buffering	Anti-Scaling
1847	CSTB	CSTB	0.0389348	0.425685	0.0552408	-0.204287	0.00363037	0.629972	sp.P04080.CYTB_HUMAN	0.00146224	0.713991	0.0111679	-0.289797	3.2489e-05	1.00379	Scaling	Buffering	Scaling	Scaling
1848	CSTF1	CSTF1	4.31558e-16	0.436877	0.740325	0.0376311	0.00181052	0.399246	sp.Q05048.CSTF1_HUMAN	0.0980023	0.0798809	0.599401	-0.0474505	0.165519	0.127331	Scaling	Buffering	Buffering	Buffering
1849	CSTF2T	CSTF2T	0.393042	0.148161	0.000795084	-0.235573	0.0365598	0.383734	sp.Q9H0L4.CSTFT_HUMAN	0.541831	-0.074427	0.358929	-0.060845	0.915733	-0.013582	Buffering	Buffering	Buffering	Buffering
1850	CSTF3	CSTF3	0.000574185	0.295331	0.0646153	-0.13318	1.98428e-05	0.428511	sp.Q12996.CSTF3_HUMAN	0.153862	0.101781	0.537712	0.0317371	0.373653	0.0700436	Scaling	Buffering	Buffering	Buffering
1851	CTAGE1	CTAGE1	0.140341	-0.0196299	0.623966	-0.00641398	0.195895	-0.0132159	sp.Q96RT6.CTGE2_HUMAN	0.699869	0.0596578	0.00459251	0.188062	0.400332	-0.128404	Buffering	Buffering	Buffering	Anti-Scaling
1852	CTAGE15	CTAGE15	0.9745	-0.00274084	0.693254	-0.0408921	0.736058	0.0381513	sp.A4D2H0.CTGEF_HUMAN	0.09099	-0.110493	0.14217	0.135844	0.0129725	-0.246337	Buffering	Buffering	Anti-Scaling	Anti-Scaling
1853	CTBP1	CTBP1	0.00861631	0.468353	4.77087e-10	-0.39504	3.59664e-05	0.863393	sp.Q13363.CTBP1_HUMAN	0.00894278	0.381075	0.0280505	-0.101998	0.00163701	0.483074	Scaling	Scaling	Scaling	Buffering
1854	CTBP2	CTBP2	0.542188	0.185304	0.0109997	-0.376115	0.0822266	0.561419	sp.P56545.CTBP2_HUMAN	0.855476	0.0226474	0.000267507	-0.220087	0.0715871	0.242734	Buffering	Scaling	Buffering	Buffering
1855	CTBS	CTBS	0.0502049	0.284451	0.0576483	-0.190817	0.00378691	0.475267	sp.Q01459.DIAC_HUMAN	0.67952	0.0565582	0.720544	-0.0391657	0.540313	0.0957239	Scaling	Buffering	Buffering	Buffering
1856	CTC1	CTC1	0.0241302	0.31345	3.4342e-05	-0.330383	2.03838e-05	0.643832	sp.Q2NKJ3.CTC1_HUMAN	0.460941	0.13223	0.625067	0.0561368	0.672852	0.0760928	Scaling	Scaling	Buffering	Buffering
1857	CTCF	CTCF	0.130572	0.129339	2.78828e-06	-0.293375	2.64582e-05	0.422714	sp.P49711.CTCF_HUMAN	0.803246	0.0187476	0.0183922	-0.139282	0.0658009	0.158029	Buffering	Scaling	Buffering	Buffering
1858	CTDNEP1	CTDNEP1	0.00099207	0.286198	3.40414e-15	-0.41681	6.26442e-11	0.703008	sp.O95476.CNEP1_HUMAN	0.536446	-0.0964688	0.00336843	-0.268511	0.279822	0.172042	Scaling	Scaling	Buffering	Scaling
1859	CTDP1	CTDP1	0.0387489	0.356375	1.1905e-21	-0.609754	6.61807e-06	0.966129	sp.Q9Y5B0.CTDP1_HUMAN	0.084475	0.229067	2.34866e-10	-0.304396	0.000387277	0.533463	Scaling	Scaling	Buffering	Scaling
1860	CTDSP1	CTDSP1	0.486501	0.0779009	0.000178116	-0.353267	0.00174823	0.431168	sp.Q9GZU7.CTDS1_HUMAN	0.497332	0.0842473	0.0192111	-0.22962	0.0352369	0.313867	Buffering	Scaling	Buffering	Buffering
1861	CTDSP2	CTDSP2	0.842171	0.02862	0.157446	-0.190189	0.237819	0.218809	sp.O14595.CTDS2_HUMAN	0.0742961	0.29847	0.0130189	0.749133	0.150303	-0.450663	Buffering	Buffering	Scaling	Anti-Scaling
1862	CTDSPL	CTDSPL	0.394906	0.405984	0.886507	0.0192461	0.413361	0.386738	sp.O15194.CTDSL_HUMAN	0.100165	0.538219	0.0754454	0.198734	0.286977	0.339485	Scaling	Buffering	Scaling	Anti-Scaling
1863	CTDSPL2	CTDSPL2	0.535956	0.0893103	0.000585146	-0.276079	0.0218104	0.365389	sp.Q05D32.CTSL2_HUMAN	0.492267	0.0938548	0.0152389	-0.18794	0.0599532	0.281795	Buffering	Scaling	Buffering	Buffering
1864	CTGF	CTGF	0.958032	-0.0374823	0.245265	-0.318765	0.694835	0.281282	sp.P29279.CTGF_HUMAN	0.970025	0.0163486	0.203198	-0.226045	0.579779	0.242394	Buffering	Scaling	Buffering	Buffering
1865	CTH	CTH	0.209618	0.218188	0.000221158	-0.520695	0.000223724	0.738883	sp.P32929.CGL_HUMAN	0.333202	-0.257751	0.000235444	-0.531546	0.324345	0.273795	Buffering	Scaling	Anti-Scaling	Scaling
1866	CTHRC1	CTHRC1	0.329056	0.275125	0.653302	-0.170709	0.285044	0.445834	sp.Q96CG8.CTHR1_HUMAN	0.335423	0.191638	0.652441	-0.124364	0.291102	0.316002	Scaling	Buffering	Buffering	Buffering
1867	CTIF	CTIF	4.8475e-05	0.983681	0.000178384	-0.423569	2.4412e-07	1.40725	sp.O43310.2.CTIF_HUMAN	0.177642	0.262811	5.97564e-05	-0.327557	0.0050553	0.590368	Scaling	Scaling	Scaling	Scaling
1868	CTNNA1	CTNNA1	6.02809e-05	0.575568	0.336398	-0.14205	8.30608e-05	0.717618	sp.P35221.CTNA1_HUMAN	0.453458	-0.123471	0.953933	0.0096169	0.519598	-0.133088	Scaling	Buffering	Anti-Scaling	Buffering
1869	CTNNA2	CTNNA2	0.0964341	0.318275	0.719325	0.0384867	0.184596	0.279788	sp.P26232.5.CTNA2_HUMAN	0.722815	-0.0656438	0.00054587	0.540677	0.0072056	-0.606321	Scaling	Buffering	Buffering	Anti-Scaling
1870	CTNNAL1	CTNNAL1	0.00357211	0.522445	0.141762	-0.203389	0.000249135	0.725834	sp.Q9UBT7.CTNL1_HUMAN	0.0525445	0.235998	0.933654	-0.00842137	0.0624659	0.24442	Scaling	Buffering	Buffering	Buffering
1871	CTNNB1	CTNNB1	0.0307903	0.470105	1.24822e-05	-0.381602	0.000517715	0.851707	tr.B4DGU4.B4DGU4_HUMAN	0.443862	-0.212782	0.000318598	0.456488	0.0236804	-0.66927	Scaling	Scaling	Anti-Scaling	Anti-Scaling
1872	CTNNBIP1	CTNNBIP1	0.0361222	0.418822	0.910946	0.0137347	0.0554863	0.405087	sp.Q9NSA3.CNBP1_HUMAN	0.496303	0.155846	0.378832	-0.114202	0.251995	0.270048	Scaling	Buffering	Buffering	Buffering
1873	CTNNBL1	CTNNBL1	9.08091e-12	0.423668	0.740212	-0.0844814	0.0562088	0.508149	sp.Q8WYA6.CTBL1_HUMAN	0.0131046	0.110867	0.962005	0.00493543	0.314829	0.105932	Scaling	Buffering	Buffering	Buffering
1874	CTNND1	CTNND1	0.144742	0.312781	0.353534	0.144935	0.469159	0.167845	sp.O60716.3.CTND1_HUMAN	0.161823	0.301794	0.0966647	0.295408	0.978554	0.00638555	Scaling	Anti-Scaling	Scaling	Anti-Scaling
1875	CTNND1	CTNND1	0.144742	0.312781	0.353534	0.144935	0.469159	0.167845	sp.O60716.4.CTND1_HUMAN	0.13125	0.250861	0.129588	0.198726	0.773909	0.0521343	Scaling	Anti-Scaling	Scaling	Anti-Scaling
1876	CTNND2	CTNND2	0.232246	-0.138993	0.403815	-0.147184	0.963207	0.00819137	sp.Q9UQB3.CTND2_HUMAN	0.825395	0.0246547	0.389597	-0.122247	0.288676	0.146901	Anti-Scaling	Buffering	Buffering	Buffering
1877	CTPS1	CTPS1	0.0705992	0.303573	0.000406088	-0.366368	0.000401186	0.669941	sp.P17812.PYRG1_HUMAN	0.702679	-0.0543514	3.45498e-07	-0.486835	0.00671737	0.432483	Scaling	Scaling	Buffering	Scaling
1878	CTR9	CTR9	0.0243583	0.248923	6.48159e-12	-0.491465	2.51647e-08	0.740387	sp.Q6PD62.CTR9_HUMAN	0.223793	0.0993	0.591769	-0.0268908	0.151705	0.126191	Buffering	Scaling	Buffering	Buffering
1879	CTSA	CTSA	2.8449e-09	0.611937	0.31302	-0.276999	0.00346923	0.888935	sp.P10619.PPGB_HUMAN	4.24834e-06	0.396529	0.6085	-0.101528	0.0187607	0.498057	Scaling	Scaling	Scaling	Buffering
1880	CTSB	CTSB	0.490513	0.218006	0.0182581	-0.37266	0.0620009	0.590667	sp.P07858.CATB_HUMAN	0.256034	-0.235368	0.0799661	-0.199761	0.859575	-0.0356068	Buffering	Scaling	Anti-Scaling	Buffering
1881	CTSC	CTSC	0.150896	0.335408	0.557117	-0.120056	0.0889718	0.455464	sp.P53634.CATC_HUMAN	0.279352	0.17564	0.96033	0.00645341	0.334159	0.169186	Scaling	Buffering	Buffering	Buffering
1882	CTSF	CTSF	0.467452	-0.202937	0.505618	0.154382	0.260667	-0.357318	sp.Q9UBX1.CATF_HUMAN	0.940553	-0.0171354	0.951332	-0.0132168	0.988653	-0.00391866	Anti-Scaling	Anti-Scaling	Buffering	Buffering
1883	CTSH	CTSH	0.156598	0.845057	0.31953	0.236983	0.313019	0.608074	sp.P09668.CATH_HUMAN	0.384015	0.360175	0.139149	0.270133	0.831955	0.0900416	Scaling	Anti-Scaling	Scaling	Anti-Scaling
1884	CTSL	CTSL	0.0156379	0.930086	0.56533	0.148155	0.0433382	0.781931	sp.P07711.CATL1_HUMAN	0.00743244	0.472863	0.783695	0.0347931	0.015117	0.43807	Scaling	Anti-Scaling	Scaling	Buffering
1885	CTSS	CTSS	0.253398	0.301453	0.206527	-0.43217	0.0595333	0.733623	sp.P25774.CATS_HUMAN	0.281562	0.275408	0.18243	-0.412561	0.0526479	0.687969	Scaling	Scaling	Scaling	Scaling
1886	CTSV	CTSV	0.00153781	0.8246	0.131823	0.306894	0.0632912	0.517706	sp.O60911.CATL2_HUMAN	0.0383524	0.418186	0.311938	0.137161	0.173059	0.281025	Scaling	Anti-Scaling	Scaling	Anti-Scaling
1887	CTSZ	CTSZ	0.00834185	0.677983	0.792081	0.136188	0.305317	0.541795	sp.Q9UBR2.CATZ_HUMAN	0.0242733	0.314016	0.445713	0.18592	0.603073	0.128097	Scaling	Anti-Scaling	Scaling	Anti-Scaling
1888	CTTN	CTTN	0.0441371	0.496615	9.62982e-06	0.887188	0.136184	-0.390573	sp.Q14247.SRC8_HUMAN	0.237882	0.171622	0.00263375	0.375546	0.209241	-0.203925	Scaling	Anti-Scaling	Buffering	Anti-Scaling
1889	CTTNBP2	CTTNBP2	0.0673465	0.232012	0.847304	0.03528	0.311506	0.196732	sp.Q8WZ74.CTTB2_HUMAN	0.443706	0.175962	0.0104352	0.793205	0.0572997	-0.617243	Buffering	Buffering	Buffering	Anti-Scaling
1890	CTTNBP2NL	CTTNBP2NL	0.000334479	0.66788	0.048239	-0.229069	1.28992e-05	0.896949	sp.Q9P2B4.CT2NL_HUMAN	0.0179163	0.350808	0.0318351	-0.221928	0.000558995	0.572737	Scaling	Buffering	Scaling	Buffering
1891	CTU1	CTU1	0.00643957	0.212575	1.89072e-06	-0.295198	1.87362e-08	0.507773	sp.Q7Z7A3.CTU1_HUMAN	0.140613	-0.195785	0.0171621	-0.26318	0.665491	0.0673955	Buffering	Scaling	Anti-Scaling	Scaling
1892	CTU2	CTU2	0.00232085	0.273475	1.88049e-08	-0.385445	2.35599e-09	0.658919	sp.Q2VPK5.CTU2_HUMAN	0.0565855	0.186516	0.000886675	-0.246933	9.1177e-05	0.433449	Scaling	Scaling	Buffering	Buffering
1893	CUEDC1	CUEDC1	4.15275e-05	0.785656	0.414187	-0.14596	5.93139e-05	0.931616	sp.Q9NWM3.CUED1_HUMAN	8.4416e-05	0.577625	0.726143	-0.0549353	0.000953045	0.63256	Scaling	Buffering	Scaling	Buffering
1894	CUEDC2	CUEDC2	7.90884e-07	0.673474	3.73393e-10	-0.487455	3.02692e-12	1.16093	sp.Q9H467.CUED2_HUMAN	0.112503	0.432863	0.00583181	-0.314786	0.0101007	0.747649	Scaling	Scaling	Scaling	Scaling
1895	CUL1	CUL1	1.83466e-11	0.430405	0.00266918	-0.256552	9.03675e-12	0.686957	sp.Q13616.CUL1_HUMAN	0.0217671	0.123848	0.0149926	-0.163452	8.9653e-05	0.2873	Scaling	Scaling	Buffering	Buffering
1896	CUL2	CUL2	5.76775e-05	0.464738	1.18015e-05	-0.29394	5.99165e-09	0.758679	sp.Q13617.2.CUL2_HUMAN	0.00689446	0.242111	3.61288e-06	-0.255992	5.86393e-07	0.498103	Scaling	Scaling	Buffering	Scaling
1897	CUL3	CUL3	0.264656	0.0858579	0.0123833	-0.16304	0.00816864	0.248898	sp.Q13618.CUL3_HUMAN	0.243916	0.0839962	0.000158046	-0.223407	0.000340135	0.307403	Buffering	Buffering	Buffering	Buffering
1898	CUL4A	CUL4A	1.65534e-07	0.489045	4.39215e-08	-0.371803	9.33358e-15	0.860848	sp.Q13619.CUL4A_HUMAN	0.000156385	0.479701	2.08543e-06	-0.295526	3.87819e-08	0.775228	Scaling	Scaling	Scaling	Scaling
1899	CUL5	CUL5	0.00574754	0.218987	2.04719e-13	-0.55547	7.50666e-14	0.774457	sp.Q93034.CUL5_HUMAN	0.0269917	0.17883	2.7558e-10	-0.42603	4.13813e-10	0.604859	Buffering	Scaling	Buffering	Scaling
1900	CUL7	CUL7	2.44708e-05	0.474004	0.00643892	-0.290244	6.03832e-08	0.764248	sp.Q14999.2.CUL7_HUMAN	0.000185263	0.443358	0.551451	-0.0534372	0.000161711	0.496795	Scaling	Scaling	Scaling	Buffering
1901	CUL9	CUL9	0.151325	0.176129	0.000812002	-0.340224	0.000493196	0.516353	sp.Q8IWT3.CUL9_HUMAN	0.139046	0.249522	0.755885	-0.0420722	0.139489	0.291594	Buffering	Scaling	Buffering	Buffering
1902	CUTA	CUTA	0.00155026	0.300015	0.00062254	-0.330695	6.04665e-07	0.630709	sp.O60888.2.CUTA_HUMAN	0.00221463	0.425324	0.00156808	-0.300707	4.80167e-06	0.726031	Scaling	Scaling	Scaling	Scaling
1903	CUTC	CUTC	0.0149389	0.387169	1.23338e-14	-0.625616	3.75112e-07	1.01279	sp.Q9NTM9.CUTC_HUMAN	0.0935026	0.289002	2.33289e-09	-0.513489	6.49354e-05	0.80249	Scaling	Scaling	Scaling	Scaling
1904	CUX1	CUX1	0.000112105	0.344535	0.202977	-0.145571	0.000125485	0.490106	sp.P39880.3.CUX1_HUMAN	0.0445654	0.123192	0.793739	0.0242384	0.301136	0.0989537	Scaling	Buffering	Buffering	Buffering
1905	CUX1	CUX1	0.000112105	0.344535	0.202977	-0.145571	0.000125485	0.490106	sp.Q13948.2.CASP_HUMAN	0.559818	0.0338179	0.337519	0.087382	0.564957	-0.0535641	Scaling	Buffering	Buffering	Buffering
1906	CWC15	CWC15	8.38008e-08	0.357032	1.55623e-12	-0.523686	3.02006e-20	0.880719	sp.Q9P013.CWC15_HUMAN	0.537968	0.062893	0.0680856	-0.147916	0.0541461	0.210809	Scaling	Scaling	Buffering	Buffering
1907	CWC22	CWC22	0.00402938	0.223147	7.50085e-06	-0.294433	9.79867e-08	0.51758	sp.Q9HCG8.CWC22_HUMAN	0.0321311	0.153028	0.0739562	-0.101565	0.00271291	0.254593	Buffering	Scaling	Buffering	Buffering
1908	CWC25	CWC25	0.0194551	0.190343	0.00300446	-0.278073	6.9623e-05	0.468416	sp.Q9NXE8.CWC25_HUMAN	0.452958	0.0730618	0.0484651	-0.16321	0.0469604	0.236272	Buffering	Scaling	Buffering	Buffering
1909	CWC27	CWC27	0.0713106	0.203342	3.8178e-07	-0.318384	3.92597e-05	0.521726	sp.Q6UX04.CWC27_HUMAN	0.995219	0.000622189	0.275644	-0.0849642	0.468869	0.0855864	Buffering	Scaling	Buffering	Buffering
1910	CWF19L1	CWF19L1	0.00050256	0.373205	2.8052e-13	-0.386055	1.33627e-08	0.75926	sp.Q69YN2.C19L1_HUMAN	0.000680861	0.360281	2.06094e-09	-0.302641	1.62194e-07	0.662921	Scaling	Scaling	Scaling	Scaling
1911	CWF19L2	CWF19L2	1.65325e-06	0.352608	7.67118e-10	-0.424749	5.98656e-17	0.777358	sp.Q2TBE0.C19L2_HUMAN	0.000422563	0.236564	0.00933896	-0.163507	7.23745e-07	0.40007	Scaling	Scaling	Buffering	Buffering
1912	CXADR	CXADR	0.436568	-0.313204	0.889301	0.0252086	0.403832	-0.338412	sp.P78310.CXAR_HUMAN	0.597021	-0.156054	0.591383	0.0853492	0.415439	-0.241404	Anti-Scaling	Buffering	Anti-Scaling	Buffering
1913	CXCR4	CXCR4	0.305605	-0.326363	0.271871	-0.279251	0.894713	-0.0471115	sp.P61073.2.CXCR4_HUMAN	0.335359	-0.676609	0.574324	0.171563	0.239879	-0.848172	Anti-Scaling	Scaling	Anti-Scaling	Anti-Scaling
1914	CXXC1	CXXC1	0.00137765	0.53418	1.0762e-29	-0.921361	7.95826e-10	1.45554	sp.Q9P0U4.2.CXXC1_HUMAN	0.123974	0.180048	0.192889	-0.0568292	0.0443514	0.236877	Scaling	Scaling	Buffering	Buffering
1915	CXXC5	CXXC5	0.722385	0.101869	0.105829	-0.345845	0.1736	0.447713	sp.Q7LFL8.CXXC5_HUMAN	0.967413	0.00943137	0.128439	-0.321618	0.254681	0.331049	Buffering	Scaling	Buffering	Scaling
1916	CYB561	CYB561	0.725515	0.0862216	0.26479	-0.306159	0.245889	0.392381	sp.P49447.CY561_HUMAN	0.842497	-0.0469761	0.918134	-0.0236419	0.937274	-0.0233342	Buffering	Scaling	Buffering	Buffering
1917	CYB561A3	CYB561A3	0.524587	-0.0661147	0.540696	0.0571293	0.314911	-0.123244	sp.Q8NBI2.2.CYAC3_HUMAN	0.647838	-0.0807282	0.933706	-0.0129728	0.727449	-0.0677553	Buffering	Buffering	Buffering	Buffering
1918	CYB5A	CYB5A	0.526449	0.3616	0.424414	-0.13042	0.384901	0.492021	sp.P00167.CYB5_HUMAN	0.588953	0.204164	0.812098	0.03404	0.645192	0.170124	Scaling	Buffering	Buffering	Buffering
1919	CYB5B	CYB5B	7.96361e-05	0.545667	1.04233e-06	-0.477019	3.78981e-10	1.02269	sp.O43169.CYB5B_HUMAN	0.0332227	0.333114	0.00384369	-0.277074	0.000357311	0.610188	Scaling	Scaling	Scaling	Scaling
1920	CYB5R1	CYB5R1	0.00010544	0.34855	0.170302	-0.177341	0.000221437	0.52589	sp.Q9UHQ9.NB5R1_HUMAN	0.0445511	0.21121	0.636979	-0.0516371	0.0435194	0.262847	Scaling	Buffering	Buffering	Buffering
1921	CYB5R2	CYB5R2	0.623796	0.159306	0.946997	-0.0148947	0.621584	0.174201	sp.Q6BCY4.NB5R2_HUMAN	0.638621	-0.120832	0.394307	-0.164413	0.877046	0.0435813	Buffering	Buffering	Anti-Scaling	Buffering
1922	CYB5R3	CYB5R3	1.67963e-06	0.844002	1.10421e-05	-0.368665	1.54885e-09	1.21267	sp.P00387.3.NB5R3_HUMAN	0.00016625	0.606663	0.00914492	-0.170752	6.62988e-06	0.777414	Scaling	Scaling	Scaling	Buffering
1923	CYB5R4	CYB5R4	0.131217	0.226359	2.37176e-05	-0.320802	0.000907583	0.547161	sp.Q7L1T6.NB5R4_HUMAN	0.489162	0.141398	0.00267248	-0.253005	0.0613588	0.394404	Buffering	Scaling	Buffering	Scaling
1924	CYBA	CYBA	0.129801	-0.882481	0.0217663	-0.768817	0.853411	-0.113664	sp.P13498.CY24A_HUMAN	0.36864	-0.201178	0.044918	-0.307718	0.659975	0.106541	Anti-Scaling	Scaling	Anti-Scaling	Scaling
1925	CYBRD1	CYBRD1	0.132168	0.59833	0.009135	0.672351	0.864067	-0.0740202	sp.Q53TN4.CYBR1_HUMAN	0.0507561	0.742757	0.000113775	0.944395	0.603679	-0.201638	Scaling	Anti-Scaling	Scaling	Anti-Scaling
1926	CYC1	CYC1	1.39113e-07	0.349502	0.362399	-0.100016	0.000195356	0.449517	sp.P08574.CY1_HUMAN	7.24739e-05	0.261593	0.177596	-0.134416	0.000307422	0.396009	Scaling	Buffering	Scaling	Buffering
1927	CYCS	CYCS	2.76414e-09	0.455307	0.00551567	-0.306246	2.87425e-09	0.761553	sp.P99999.CYC_HUMAN	0.00797983	0.194994	0.0204539	-0.222385	0.000116671	0.417378	Scaling	Scaling	Buffering	Buffering
1928	CYFIP1	CYFIP1	0.0726972	0.294064	0.6453	-0.0429033	0.042804	0.336968	sp.Q7L576.CYFP1_HUMAN	0.266265	0.144639	0.0307492	0.140493	0.974858	0.00414601	Scaling	Buffering	Buffering	Anti-Scaling
1929	CYFIP2	CYFIP2	0.482897	-0.226858	0.000175388	-0.848888	0.0744129	0.622031	sp.Q96F07.CYFP2_HUMAN	0.483433	0.0589511	0.159707	-0.0868762	0.121106	0.145827	Anti-Scaling	Scaling	Buffering	Buffering
1930	CYGB	CYGB	0.795726	0.0605547	0.489401	-0.159101	0.468054	0.219656	sp.Q8WWM9.CYGB_HUMAN	0.303883	0.537584	0.574886	-0.209046	0.219747	0.746631	Buffering	Buffering	Scaling	Buffering
1931	CYHR1	CYHR1	3.2694e-09	0.402462	0.158506	-0.160276	1.06727e-05	0.562739	tr.E9PJD7.E9PJD7_HUMAN	0.334487	0.0752472	0.992681	-0.00100133	0.528229	0.0762485	Scaling	Buffering	Buffering	Buffering
1932	CYHR1	CYHR1	3.2694e-09	0.402462	0.158506	-0.160276	1.06727e-05	0.562739	sp.Q6ZMK1.4.CYHR1_HUMAN	0.184596	0.112149	0.928449	-0.00952769	0.321982	0.121677	Scaling	Buffering	Buffering	Buffering
1933	CYLD	CYLD	4.51338e-05	0.684519	0.00658024	-0.27839	2.22581e-07	0.962909	sp.Q9NQC7.CYLD_HUMAN	0.0344456	0.298649	0.249906	-0.103287	0.00840652	0.401936	Scaling	Scaling	Scaling	Buffering
1934	CYP1B1	CYP1B1	0.343333	0.349419	0.480395	0.263136	0.858821	0.0862826	sp.Q16678.CP1B1_HUMAN	0.880206	0.0423797	0.929712	0.0206383	0.948842	0.0217414	Scaling	Anti-Scaling	Buffering	Buffering
1935	CYP20A1	CYP20A1	0.000684278	0.348649	0.0889141	-0.13652	6.49217e-05	0.485169	sp.Q6UW02.CP20A_HUMAN	0.0161822	0.254407	0.215705	-0.104909	0.00392934	0.359317	Scaling	Buffering	Scaling	Buffering
1936	CYP27A1	CYP27A1	0.00750552	1.11552	0.722636	0.086235	0.0220456	1.02929	sp.Q02318.CP27A_HUMAN	0.00549937	0.859022	0.460776	0.145949	0.0322269	0.713073	Scaling	Buffering	Scaling	Anti-Scaling
1937	CYP2S1	CYP2S1	0.00820764	0.792938	0.673854	0.0947976	0.0334789	0.698141	sp.Q96SQ9.2.CP2S1_HUMAN	0.0224057	0.498456	0.0632342	0.379042	0.632511	0.119414	Scaling	Buffering	Scaling	Anti-Scaling
1938	CYP4F11	CYP4F11	0.863829	-0.0962825	0.0132659	0.552757	0.26656	-0.649039	sp.Q9HBI6.CP4FB_HUMAN	0.768746	-0.187468	0.00967093	0.52876	0.280192	-0.716228	Buffering	Anti-Scaling	Anti-Scaling	Anti-Scaling
1939	CYP4F12	CYP4F12	0.035631	-0.548475	0.627621	0.081691	0.0202068	-0.630166	sp.Q9HCS2.CP4FC_HUMAN	0.710218	0.202525	0.0348115	0.429298	0.684071	-0.226773	Anti-Scaling	Buffering	Buffering	Anti-Scaling
1940	CYP51A1	CYP51A1	0.0662629	0.190866	0.00854559	-0.347772	0.000114794	0.538638	sp.Q16850.CP51A_HUMAN	0.415231	0.0793561	0.110875	-0.176289	0.0364677	0.255645	Buffering	Scaling	Buffering	Buffering
1941	CYR61	CYR61	0.0453016	0.974187	0.79296	0.0845435	0.0875238	0.889643	sp.O00622.CYR61_HUMAN	0.0358541	0.47157	0.643047	-0.0727717	0.0222799	0.544342	Scaling	Buffering	Scaling	Buffering
1942	CYSTM1	CYSTM1	3.14243e-05	0.810079	0.365198	0.143932	0.00157937	0.666147	sp.Q9H1C7.CYTM1_HUMAN	8.55437e-06	0.883563	0.33375	0.158734	0.000426855	0.724829	Scaling	Anti-Scaling	Scaling	Anti-Scaling
1943	CYTH1	CYTH1	0.00489724	0.326185	0.178487	-0.142283	0.000991364	0.468468	sp.Q15438.CYH1_HUMAN	0.411608	-0.102585	0.0498724	-0.213776	0.444121	0.111191	Scaling	Buffering	Anti-Scaling	Buffering
1944	CYTH2	CYTH2	0.000244427	0.282269	5.11921e-06	-0.328134	4.70101e-11	0.610403	sp.Q99418.CYH2_HUMAN	0.0317825	0.186749	0.758397	0.0215226	0.0786546	0.165226	Scaling	Scaling	Buffering	Buffering
1945	CYTH3	CYTH3	0.000155159	0.512835	0.49516	-0.154934	0.0055284	0.667769	sp.O43739.CYH3_HUMAN	0.0117253	0.240521	0.829652	0.0304444	0.165238	0.210077	Scaling	Buffering	Buffering	Buffering
1946	D2HGDH	D2HGDH	0.429676	0.127389	0.00149331	-0.358105	0.00912759	0.485494	sp.Q8N465.D2HDH_HUMAN	0.0301865	0.350549	0.00937575	-0.251236	0.000748332	0.601785	Buffering	Scaling	Scaling	Scaling
1947	DAAM1	DAAM1	3.62054e-06	0.743233	0.00243471	-0.371932	1.02907e-09	1.11517	sp.Q9Y4D1.DAAM1_HUMAN	0.000562425	0.446235	0.171837	-0.118156	6.1142e-05	0.564391	Scaling	Scaling	Scaling	Buffering
1948	DAAM2	DAAM2	0.773114	0.0845138	0.754267	0.0728511	0.972943	0.0116628	sp.Q86T65.DAAM2_HUMAN	0.279533	-0.272542	0.445146	-0.130878	0.581673	-0.141664	Buffering	Buffering	Anti-Scaling	Buffering
1949	DAB1	DAB1	0.499725	0.15424	0.0639779	-0.127763	0.222254	0.282003	sp.O75553.DAB1_HUMAN	0.138805	0.833964	0.200766	0.369485	0.405347	0.464479	Buffering	Buffering	Scaling	Anti-Scaling
1950	DAB2	DAB2	0.13106	0.317298	0.449914	0.275354	0.909995	0.0419435	sp.P98082.DAB2_HUMAN	0.125204	0.251587	0.99568	-0.00146127	0.36793	0.253048	Scaling	Anti-Scaling	Scaling	Buffering
1951	DAB2IP	DAB2IP	3.59216e-05	0.776547	0.3843	-0.141015	1.78432e-05	0.917562	sp.Q5VWQ8.DAB2P_HUMAN	0.0110347	0.317796	0.697844	-0.0364254	0.00861877	0.354221	Scaling	Buffering	Scaling	Buffering
1952	DACH1	DACH1	0.12056	0.515403	0.0607176	-0.220645	0.0274839	0.736048	sp.Q9UI36.DACH1_HUMAN	0.120536	0.642976	0.0766748	-0.294038	0.0252744	0.937014	Scaling	Buffering	Scaling	Scaling
1953	DAD1	DAD1	0.000645	0.306869	0.0805443	-0.0985731	2.91327e-05	0.405442	sp.P61803.DAD1_HUMAN	0.0905873	0.121182	0.0953247	0.0925053	0.702459	0.028677	Scaling	Buffering	Buffering	Buffering
1954	DAG1	DAG1	0.0165242	0.774391	0.568747	-0.0730108	0.00897211	0.847402	sp.Q14118.DAG1_HUMAN	0.0342017	0.422666	0.901722	-0.0112134	0.0284608	0.433879	Scaling	Buffering	Scaling	Buffering
1955	DAGLA	DAGLA	0.51816	-0.0797573	0.715206	-0.0388971	0.768035	-0.0408602	sp.Q9Y4D2.DGLA_HUMAN	0.40229	-0.231198	0.166513	-0.338066	0.648329	0.106868	Buffering	Buffering	Anti-Scaling	Scaling
1956	DAGLB	DAGLB	0.000119116	0.303111	0.000237577	-0.553184	1.09464e-07	0.856295	sp.Q8NCG7.DGLB_HUMAN	0.000245795	0.281235	0.0464095	-0.230196	3.32093e-05	0.511431	Scaling	Scaling	Scaling	Buffering
1957	DAP	DAP	4.8751e-09	0.561193	0.0671101	-0.278449	2.62707e-06	0.839642	sp.P51397.DAP1_HUMAN	0.221385	0.144196	0.124477	-0.285441	0.0288992	0.429637	Scaling	Scaling	Buffering	Scaling
1958	DAP3	DAP3	7.53449e-07	0.280412	0.000193552	-0.397697	2.28051e-08	0.678109	sp.P51398.RT29_HUMAN	0.214901	0.077297	0.424721	0.062433	0.868418	0.014864	Scaling	Scaling	Buffering	Buffering
1959	DAPK1	DAPK1	0.0389486	0.725555	0.236373	0.260132	0.200064	0.465423	sp.P53355.3.DAPK1_HUMAN	0.276648	0.194204	0.759442	0.0336264	0.393361	0.160578	Scaling	Anti-Scaling	Buffering	Buffering
1960	DAPK3	DAPK3	0.386061	0.147605	0.000413944	-0.275469	0.0205792	0.423075	sp.O43293.DAPK3_HUMAN	0.954383	0.0122625	0.115298	0.121604	0.615421	-0.109341	Buffering	Scaling	Buffering	Anti-Scaling
1961	DARS	DARS	0.0128547	0.210771	0.076952	-0.138896	0.00120358	0.349668	sp.P14868.SYDC_HUMAN	0.832027	-0.0134705	0.0827877	-0.0956178	0.27018	0.0821473	Buffering	Buffering	Buffering	Buffering
1962	DARS2	DARS2	2.83078e-06	0.347227	0.0123303	-0.326124	4.21533e-06	0.67335	sp.Q6PI48.SYDM_HUMAN	6.19912e-05	0.311665	0.306774	-0.124974	0.00137634	0.43664	Scaling	Scaling	Scaling	Buffering
1963	DAXX	DAXX	0.0470988	0.191134	3.01847e-07	-0.389744	7.01814e-07	0.580878	sp.Q9UER7.DAXX_HUMAN	0.108914	0.126898	0.000196218	-0.236826	0.000148671	0.363724	Buffering	Scaling	Buffering	Buffering
1964	DAZAP1	DAZAP1	0.520403	0.0677924	0.00569593	-0.137899	0.0611614	0.205691	sp.Q96EP5.DAZP1_HUMAN	0.996819	-0.000730929	0.569352	-0.032469	0.8623	0.0317381	Buffering	Buffering	Buffering	Buffering
1965	DAZAP2	DAZAP2	0.480499	0.113952	0.0532945	-0.145811	0.134449	0.259763	sp.Q15038.DAZP2_HUMAN	0.512563	0.187186	0.00108616	-0.59853	0.0182898	0.785716	Buffering	Buffering	Buffering	Scaling
1966	DBI	DBI	0.0337026	0.271244	0.00757344	-0.302602	0.00033514	0.573846	sp.P07108.5.ACBP_HUMAN	0.964195	0.0101495	0.000120896	-0.611511	0.016418	0.621661	Scaling	Scaling	Buffering	Scaling
1967	DBN1	DBN1	0.193738	0.304335	0.0363185	-0.340402	0.0127093	0.644737	sp.Q16643.3.DREB_HUMAN	0.228684	0.20057	0.583453	-0.062809	0.142658	0.263379	Scaling	Scaling	Buffering	Buffering
1968	DBNL	DBNL	1.49443e-12	0.510893	0.194661	-0.135073	4.859e-08	0.645966	sp.Q9UJU6.3.DBNL_HUMAN	0.000524951	0.312237	0.667693	-0.0654694	0.0158074	0.377706	Scaling	Buffering	Scaling	Buffering
1969	DBNL	DBNL	1.49443e-12	0.510893	0.194661	-0.135073	4.859e-08	0.645966	sp.Q9UJU6.DBNL_HUMAN	0.00019867	0.417954	0.47625	-0.135457	0.00452373	0.55341	Scaling	Buffering	Scaling	Buffering
1970	DBP	DBP	0.698341	0.0602404	0.0259708	-0.30138	0.0437944	0.36162	sp.Q10586.DBP_HUMAN	0.961918	-0.0137635	0.945692	-0.0136223	0.999629	-0.000141223	Buffering	Scaling	Buffering	Buffering
1971	DBR1	DBR1	0.00147075	0.208138	0.000459808	-0.334968	9.76461e-07	0.543106	sp.Q9UK59.DBR1_HUMAN	0.0278402	0.147796	0.000625243	-0.221078	1.84313e-05	0.368874	Buffering	Scaling	Buffering	Buffering
1972	DBT	DBT	0.00111739	0.312878	0.00732596	-0.190593	7.46527e-06	0.503471	sp.P11182.ODB2_HUMAN	0.0242182	0.336667	0.986869	-0.00136415	0.0344662	0.338031	Scaling	Buffering	Scaling	Buffering
1973	DCAF10	DCAF10	4.86335e-05	0.492718	0.000142617	-0.240018	4.28808e-08	0.732736	sp.Q5QP82.DCA10_HUMAN	0.000154833	0.444431	0.0725951	-0.111654	8.12275e-06	0.556085	Scaling	Buffering	Scaling	Buffering
1974	DCAF11	DCAF11	0.0150577	0.252298	4.62045e-06	-0.360484	5.71687e-07	0.612782	sp.Q8TEB1.DCA11_HUMAN	0.00354587	0.226483	0.000485816	-0.209996	6.06824e-07	0.436479	Scaling	Scaling	Buffering	Buffering
1975	DCAF13	DCAF13	4.07005e-08	0.390204	4.75863e-05	-0.404238	1.02843e-11	0.794443	sp.Q9NV06.DCA13_HUMAN	0.962938	0.00264975	0.827798	0.0204209	0.857464	-0.0177711	Scaling	Scaling	Buffering	Buffering
1976	DCAF15	DCAF15	6.91577e-06	0.471711	1.57478e-07	-0.322849	2.46342e-10	0.794559	sp.Q66K64.DCA15_HUMAN	0.452749	-0.1361	0.00227153	-0.284882	0.417917	0.148782	Scaling	Scaling	Anti-Scaling	Scaling
1977	DCAF16	DCAF16	0.209245	0.262176	9.64079e-15	-0.55211	0.000817995	0.814287	sp.Q9NXF7.DCA16_HUMAN	0.0263401	0.416198	4.28048e-05	-0.349599	0.00029711	0.765797	Scaling	Scaling	Scaling	Scaling
1978	DCAF5	DCAF5	0.000261805	0.351074	8.29138e-11	-0.442455	5.44934e-12	0.793529	sp.Q96JK2.DCAF5_HUMAN	0.0545571	0.265702	6.02451e-08	-0.460911	2.19224e-06	0.726613	Scaling	Scaling	Scaling	Scaling
1979	DCAF6	DCAF6	4.68744e-05	0.28877	0.00499663	-0.320843	3.0309e-06	0.609614	sp.Q58WW2.3.DCAF6_HUMAN	0.1891	0.0837179	0.395022	0.0772578	0.948567	0.00646011	Scaling	Scaling	Buffering	Buffering
1980	DCAF7	DCAF7	0.0306789	0.170346	0.000888068	-0.302716	9.5616e-06	0.473062	sp.P61962.DCAF7_HUMAN	0.0979241	0.119973	0.322382	-0.0670386	0.0326466	0.187012	Buffering	Scaling	Buffering	Buffering
1981	DCAF8	DCAF8	1.31725e-05	0.314659	0.000378715	-0.525419	3.78577e-07	0.840079	tr.G3V3G9.G3V3G9_HUMAN	0.00136357	0.237852	0.361852	-0.0902746	0.00428356	0.328127	Scaling	Scaling	Buffering	Buffering
1982	DCAKD	DCAKD	0.0562574	0.205014	0.013008	-0.264174	0.000836431	0.469188	sp.Q8WVC6.DCAKD_HUMAN	0.0120861	0.193641	0.00318855	-0.244602	1.07667e-05	0.438243	Buffering	Scaling	Buffering	Buffering
1983	DCBLD1	DCBLD1	0.212752	0.309605	0.047814	-0.255366	0.0291805	0.564971	sp.Q8N8Z6.DCBD1_HUMAN	0.320228	0.23747	0.713507	-0.0492568	0.249515	0.286727	Scaling	Scaling	Buffering	Buffering
1984	DCBLD2	DCBLD2	0.432068	0.225318	0.18196	0.505088	0.515369	-0.279769	sp.Q96PD2.2.DCBD2_HUMAN	0.0902227	0.310354	0.101875	0.431558	0.669525	-0.121204	Buffering	Anti-Scaling	Scaling	Anti-Scaling
1985	DCDC1	DCDC1	0.363609	-0.0618606	0.521755	-0.0476089	0.866365	-0.0142517	tr.M0R2J8.M0R2J8_HUMAN	0.190344	-0.171918	0.938569	-0.0112679	0.344853	-0.160651	Buffering	Buffering	Anti-Scaling	Buffering
1986	DCDC2	DCDC2	0.19816	-0.309168	0.0830355	-0.337883	0.911051	0.028715	sp.Q9UHG0.DCDC2_HUMAN	0.0202517	-0.806546	0.286698	-0.315903	0.196247	-0.490644	Anti-Scaling	Scaling	Anti-Scaling	Scaling
1987	DCHS1	DCHS1	0.046265	-0.225137	0.168595	-0.147736	0.515365	-0.0774016	sp.Q96JQ0.PCD16_HUMAN	0.150897	-0.361538	0.567047	-0.176933	0.543863	-0.184604	Anti-Scaling	Buffering	Anti-Scaling	Buffering
1988	DCK	DCK	0.576045	0.142565	3.13676e-09	-0.457753	0.0323167	0.600318	sp.P27707.DCK_HUMAN	0.781719	0.0653279	1.06261e-07	-0.437079	0.0485188	0.502407	Buffering	Scaling	Buffering	Scaling
1989	DCLK1	DCLK1	0.0965273	-0.348246	0.773759	0.0459291	0.0625805	-0.394175	sp.O15075.DCLK1_HUMAN	0.60991	-0.153882	0.990029	-0.00223053	0.622034	-0.151651	Anti-Scaling	Buffering	Anti-Scaling	Buffering
1990	DCLRE1C	DCLRE1C	0.000317716	0.458503	1.12647e-11	-0.436435	1.82024e-09	0.894938	sp.Q96SD1.DCR1C_HUMAN	0.0586051	0.250515	0.0877873	-0.175765	0.00317182	0.42628	Scaling	Scaling	Scaling	Buffering
1991	DCP1A	DCP1A	0.633298	0.0698209	6.1794e-20	-0.538488	0.000565497	0.608309	sp.Q9NPI6.DCP1A_HUMAN	0.606335	0.0905047	6.61137e-09	-0.359321	0.01809	0.449826	Buffering	Scaling	Buffering	Scaling
1992	DCP1B	DCP1B	0.00205763	0.399679	0.00197101	-0.369213	8.24237e-07	0.768892	sp.Q8IZD4.DCP1B_HUMAN	0.00786752	0.330948	0.0855344	-0.206792	0.000468627	0.53774	Scaling	Scaling	Scaling	Buffering
1993	DCP2	DCP2	0.900548	0.0108246	5.09188e-11	-0.561185	1.61487e-07	0.57201	sp.Q8IU60.DCP2_HUMAN	0.201409	-0.110115	0.00811787	-0.201987	0.368774	0.0918724	Buffering	Scaling	Anti-Scaling	Buffering
1994	DCPS	DCPS	0.0703256	0.205037	5.50417e-05	-0.36543	1.58445e-05	0.570467	sp.Q96C86.DCPS_HUMAN	0.0659951	0.244047	2.05421e-05	-0.411774	1.66109e-05	0.655821	Buffering	Scaling	Buffering	Scaling
1995	DCT	DCT	0.810793	0.100333	0.518721	-0.146192	0.556329	0.246526	sp.P40126.2.TYRP2_HUMAN	0.654255	0.162552	0.0301326	-0.459074	0.105393	0.621626	Buffering	Buffering	Buffering	Scaling
1996	DCTD	DCTD	0.000536056	0.466226	0.000467436	-0.239146	6.45896e-06	0.705371	sp.P32321.2.DCTD_HUMAN	0.000493376	0.734433	0.000684704	-0.271625	2.39079e-05	1.00606	Scaling	Buffering	Scaling	Scaling
1997	DCTN1	DCTN1	1.01152e-05	0.430477	0.814824	-0.0203128	0.000169849	0.45079	sp.Q14203.4.DCTN1_HUMAN	0.0672957	0.336124	0.114315	-0.495388	0.0206313	0.831512	Scaling	Buffering	Scaling	Scaling
1998	DCTN1	DCTN1	1.01152e-05	0.430477	0.814824	-0.0203128	0.000169849	0.45079	sp.Q14203.DCTN1_HUMAN	0.603428	0.0399473	0.459389	-0.0689716	0.335036	0.108919	Scaling	Buffering	Buffering	Buffering
1999	DCTN2	DCTN2	0.0967322	0.176877	0.320778	-0.0935344	0.0391896	0.270412	sp.Q13561.DCTN2_HUMAN	0.81519	0.0212647	0.268734	-0.0901245	0.310789	0.111389	Buffering	Buffering	Buffering	Buffering
[truncated: 7,412 more rows]

## Sheet: No_Flipped
	Gene_Symbol	RNA_ID	RNA.Pvalue.Gain	RNA.Difference.Gain	RNA.Pvalue.Loss	RNA.Difference.Loss	RNA.Pvalue.Gain vs Loss	RNA.Difference Gain vs Loss	Protein_ID	Protein.Pvalue.Gain	Protein.Difference.Gain	Protein.Pvalue.Loss	Protein.Diff.Loss	Protein.Pvalue.Gain vs Loss	Protein.Difference.Gain vs Loss	RNA.Gain.Difference.Category	RNA.Loss.Difference.Category	Protein.Gain.Difference.Category	Protein.Loss.Difference.Category
1	A2ML1	A2ML1	0.0698517	-0.159935	0.498096	-0.0711962	0.385508	-0.0887393	sp.A8K2U0.A2ML1_HUMAN	0.0635033	-0.654509	0.13606	-0.509073	0.680704	-0.145436	Anti-Scaling	Buffering	Anti-Scaling	Scaling
2	AAAS	AAAS	0.186219	0.151554	0.000374676	-0.250222	0.0020924	0.401777	sp.Q9NRG9.AAAS_HUMAN	0.219329	0.0919093	0.113829	0.0952134	0.970015	-0.00330412	Buffering	Scaling	Buffering	Buffering
3	AACS	AACS	0.682164	0.0572398	0.908089	-0.0109449	0.663861	0.0681847	sp.Q86V21.AACS_HUMAN	0.94938	-0.0103249	0.881271	-0.015305	0.977881	0.00498003	Buffering	Buffering	Buffering	Buffering
4	AAGAB	AAGAB	4.24247e-05	0.505401	0.0572018	-0.122857	2.30297e-06	0.628258	sp.Q6PD74.AAGAB_HUMAN	0.0171693	0.371099	0.00311112	-0.265612	0.000226241	0.636711	Scaling	Buffering	Scaling	Scaling
5	AAK1	AAK1	0.00329143	0.322044	0.906314	-0.0132015	0.0157531	0.335245	sp.Q2M2I8.AAK1_HUMAN	0.00823824	0.277235	0.174129	-0.158361	0.0023693	0.435596	Scaling	Buffering	Scaling	Buffering
6	AAMDC	AAMDC	0.325889	0.129303	0.022133	-0.277827	0.0124278	0.407129	sp.Q9H7C9.AAMDC_HUMAN	0.895078	0.0183478	0.00932058	-0.370937	0.0257747	0.389285	Buffering	Scaling	Buffering	Scaling
7	AAMP	AAMP	6.48744e-06	0.355999	0.00190773	-0.244385	1.55615e-08	0.600384	sp.Q13685.AAMP_HUMAN	0.0212342	0.288259	0.0126967	-0.268961	0.000356436	0.55722	Scaling	Buffering	Scaling	Scaling
8	AAR2	AAR2	1.18634e-14	0.392627	0.464462	-0.116743	0.00513603	0.509371	sp.Q9Y312.AAR2_HUMAN	6.31791e-06	0.224072	0.63991	-0.0452659	0.0116571	0.269338	Scaling	Buffering	Buffering	Buffering
9	AARS	AARS	0.000815632	0.596019	7.55644e-05	-0.364902	1.47177e-06	0.960921	sp.P49588.SYAC_HUMAN	0.018628	0.296006	0.000386185	-0.295285	2.40493e-05	0.59129	Scaling	Scaling	Scaling	Scaling
[truncated: 9,380 more rows]

## Sheet: No_Low_Expression
	Gene_Symbol	RNA_ID	RNA.Pvalue.Gain	RNA.Difference.Gain	RNA.Pvalue.Loss	RNA.Difference.Loss	RNA.Pvalue.Gain vs Loss	RNA.Difference Gain vs Loss	Protein_ID	Protein.Pvalue.Gain	Protein.Difference.Gain	Protein.Pvalue.Loss	Protein.Diff.Loss	Protein.Pvalue.Gain vs Loss	Protein.Difference.Gain vs Loss	RNA.Gain.Difference.Category	RNA.Loss.Difference.Category	Protein.Gain.Difference.Category	Protein.Loss.Difference.Category
[truncated: 9,257 more rows]

[truncated: 6 more sheets: No_Low_Reproducibility, Merge_Control, NSCLC_Only, List_Flipped_Genes, RPPA_Data, Yeast_Data]
