# Supplementary material for: Extensive protein dosage compensation in aneuploid human cancers
Source: HighWire-hosted journal article supplement (doi:10.1101/gr.276378.121), 2022-06-14
Supplement: Supplemental_Table_S6.xlsx [file Supplemental_Table_S6.xlsx]

## Sheet: Legend Table S6
Supplemental Table 6. List of gene symbols per gene groups investigated
1) Info- Information about gene group origin
2-11 ) list of gene symbols or uniprot IDs per gene group

## Sheet: Info
Supplementary Table 6
Lists of most gene groups used.
The lists of oncogenes (OG) and tumor supressor genes (TSG) were retrieved from Bailey et al. (2018) Comprehensive characterization of cancer driver genes and mutations. Cell 173(2)
	Supplemental data 8, table S1, all genes labeled "oncogene" or "tsg"
Sheet name	Info
CORUM	All proteins part of the large and small ribosomal subunits, retrrieven from the CORUM database
Ribosome	all "HSPA" genes
HSPA	all CORUM genes, these are Uniprot IDs, need to be correlated to gene symbol before analysis.
Spliceosome	mRNA splicing, via spliceosome GO:0000398
Autophagy	Autophagy GO:0006914
CellCycle	Cell Cycle, GO:0007049
ER.Membrane	intrinsic component of endoplasmic reticulum membrane, GO:0031227
rRNAProcessing	GO: 0006364
Small_Mol_Metabolism	Small molecule metabolic process GO:0044281
ExtracellMatrixStructural	Extracellular matrix structural constituant GO:0005201

## Sheet: CORUM
Uniprot_ID
A0A024R3R1
A0A061I2H9
A0A0D9QW47
A0A0D9QYM3
A0A0D9RE31
A0A0D9RFH6
A0A0D9RLK8
A0A0D9RNP2
A0A0D9S330
A0A0D9S4T5
A0A0F7CV11
A0A0F7GJB8
A0A0G2K0H3
A0A0G2K2P5
A0A0G2K761
A0A1U7Q6H2
A0A1U7QDJ2
A0A1U7QSQ4
A0A1U7QTB8
A0A1U7R8Q6
A0A1U7RET1
A0A1U8C4L9
A0A1U8CE17
A0A1U8CH79
A0A1U8CRX6
A0A1U8CU03
A0A287A2R9
A0A287BBH3
A0AVF1
A0FGR8
A0FGR9
A0JLT2
A1A4J1
A1A4S6
A1Z199
A2A288
A2ABV5
A2AGH6
A2AMT1
A2ARP9
A2ARV4
A2AUC9
A2RTF1
A3KGF7
A4FUA8
A4GTP4
A4IFE3
A4IFH6
A5ACB9
A5D8V6
A5PJS1
A5PKJ3
A5YKK6
A6H8Y1
A6NED2
A6NGQ2
A6NKF1
A6QQ77
A7MB24
A7MB35
A7MCY6
A8K0Z3
A8K8P3
A8MT69
A8MTZ0
A8UKE6
A8YXX8
A9UMV7
B0BNB5
B0LPN4
B1WC34
B2RS91
B2RSH2
B2RUJ5
B2RUP2
B2RWS6
B2RYN6
B2RYS2
B2RYX1
B4F7C5
B5DF89
B5DF91
B5DF99
B5DFH1
B5DFL0
B6A7P8
B6V8E6
B7ZNG0
B8QI33
C0JJ15
C0JJ16
C6KI89
D0Q0Y7
D3YZU1
D3Z8B2
D3Z8L7
D3Z902
D3ZAF6
D3ZAN3
D3ZB51
D3ZBL6
D3ZC84
D3ZCV0
D3ZDX5
D3ZE85
D3ZEI6
D3ZFB6
D3ZFK9
D3ZFQ8
D3ZHH8
D3ZHL1
D3ZHV0
D3ZHV2
D3ZK93
D3ZKB4
D3ZLB7
D3ZM37
D3ZMR1
D3ZMS5
D3ZNS8
D3ZR10
D3ZRD9
D3ZUY8
D3ZWV8
D3ZYK3
D3ZZZ9
D4A0X1
D4A4X4
D4A560
D4A6X1
D4A772
D4A7R3
D4A9Q2
D4ACF2
D4ACK1
D4ACP1
D6RGH6
E1B7B1
E1B7K3
E1BB77
E1BBI8
E1BCW3
E1BGJ0
E1BJK2
E1BM58
E1BQ34
E2QY99
E2QYC9
E2R0K5
E2R0N0
E2R434
E2R4X3
E2R9S7
E2RD72
E2RK30
E2RMC0
E2RNP2
E2RQ08
E2RQE4
E2RT60
E2RT75
E9PYG6
E9PZ36
E9Q616
E9Q6R7
E9Q7E2
E9Q7X6
E9Q9F6
F1LMY4
F1LN46
F1LRS8
F1LYS7
F1LZX9
F1M386
F1M491
F1M7L9
F1M7Y5
F1M9C3
F1MA98
F1MAD2
F1MCK2
F1MIC9
F1MKB0
F1MLD6
F1MPB1
F1MPZ9
F1MUP3
F1MWD3
F1MXH6
F1N206
F1N759
F1PAA3
F1PAA9
F1PBL1
F1PCT7
F1PFJ9
F1PFK4
F1PG28
F1PGE3
F1PIQ7
F1PIS0
F1PJP5
F1PJZ9
F1PKR0
F1PL90
F1PNY6
F1PUU5
F1PY05
F1Q2Q9
F1SKF9
F1SMV6
F1SNT8
F6R900
F6RGS5
F6UP44
F6XMN6
F8WG29
G1SFH9
G1SFK3
G1SGF8
G1SGL0
G1SKZ3
G1SNT3
G1SPF9
G1SR94
G1SUQ9
G1SYP2
G1SZG6
G1T315
G1T3E1
G1T8R3
G1TAE4
G1TAS0
G1TGK9
G1TNY9
G1U355
G3GU77
G3H672
G3HXZ0
G3IM13
G3N1T8
G3V6M8
G3V7P1
G3V7Q7
G5E829
H0V0F7
H0V6S9
H0V7G9
H0VMU3
I3LUP6
J9JHK9
J9NS46
J9NX43
J9NZG0
J9P3Q8
J9P4M6
M0R3M4
M0R5P8
M0RAD5
M0RB53
M0RBY8
M5FKH8
O00116
O00141
O00148
O00151
O00159
O00161
O00165
O00189
O00203
O00206
O00212
O00213
O00217
O00219
O00221
O00222
O00231
O00232
O00233
O00255
O00257
O00264
O00267
O00268
O00287
O00303
O00311
O00327
O00401
O00422
O00425
O00429
O00443
O00469
O00471
O00472
O00482
O00483
O00487
O00499
O00505
O00512
O00522
O00541
O00548
O00555
O00566
O00567
O00571
O00592
O00622
O00631
O00743
O00750
O00764
O08539
O08550
O08553
O08587
O08609
O08614
O08623
O08648
O08658
O08661
O08674
O08734
O08773
O08785
O08788
O08808
O08838
O08839
O08863
O08900
O08915
O08957
O08962
O09044
O09061
O09100
O09106
O09111
O09130
O09167
O14490
O14495
O14497
O14543
O14561
O14576
O14593
O14617
O14640
O14641
O14656
O14657
O14662
O14682
O14686
O14713
O14727
O14744
O14745
O14746
O14757
O14763
O14764
O14775
O14776
O14777
O14786
O14787
O14791
O14810
O14818
O14828
O14867
O14893
O14908
O14910
O14920
O14925
O14929
O14931
O14936
O14964
O14965
O14974
O14979
O14980
O14983
O14986
O15027
O15042
O15047
O15054
O15066
O15078
O15084
O15091
O15105
O15111
O15116
O15117
O15120
O15126
O15127
O15143
O15144
O15145
O15151
O15169
O15198
O15212
O15228
O15230
O15234
O15235
O15239
O15259
O15260
O15265
O15269
O15270
O15273
O15287
O15294
O15297
O15304
O15315
O15320
O15335
O15344
O15355
O15360
O15371
O15372
O15379
O15392
O15400
O15446
O15457
O15503
O15504
O15511
O15514
O15516
O15519
O15537
O15550
O19069
O35047
O35082
O35092
O35093
O35094
O35099
O35129
O35152
O35165
O35179
O35245
O35254
O35261
O35274
O35286
O35303
O35309
O35317
O35346
O35387
O35430
O35473
O35516
O35526
O35551
O35601
O35613
O35615
O35625
O35626
O35643
O35654
O35668
O35683
O35692
O35737
O35763
O35764
O35845
O35846
O35864
O35878
O35955
O35964
O35987
O43143
O43157
O43172
O43181
O43184
O43187
O43196
O43242
O43255
O43257
O43264
O43290
O43292
O43299
O43303
O43310
O43318
O43324
O43390
O43395
O43447
O43451
O43463
O43464
O43482
O43502
O43504
O43513
O43516
O43524
O43525
O43526
O43541
O43542
O43543
O43556
O43561
O43581
O43615
O43617
O43633
O43660
O43670
O43674
O43676
O43677
O43678
O43683
O43684
O43687
O43707
O43716
O43719
O43739
O43741
O43747
O43752
O43791
O43809
O43815
O43837
O43913
O43914
O43915
O43918
O43920
O43924
O43929
O43933
O46469
O46470
O46563
O54833
O54885
O54890
O54908
O54916
O54918
O54921
O54922
O54923
O54924
O54941
O54943
O54950
O54956
O54960
O55029
O55042
O55057
O55102
O55103
O55147
O55164
O55173
O55222
O55234
O60216
O60220
O60231
O60244
O60260
O60262
O60264
O60271
O60282
O60296
O60306
O60313
O60315
O60341
O60346
O60447
O60462
O60486
O60494
O60504
O60506
O60508
O60563
O60566
O60568
O60583
O60603
O60609
O60610
O60645
O60664
O60671
O60673
O60674
O60706
O60716
O60749
O60762
O60783
O60826
O60830
O60832
O60870
O60884
O60885
O60894
O60895
O60896
O60907
O60921
O60925
O60934
O60939
O70237
O70239
O70244
O70257
O70258
O70263
O70293
O70343
O70373
O70377
O70400
O70404
O70422
O70435
O70439
O70511
O70576
O70585
O70589
O75051
O75052
O75077
O75116
O75140
O75143
O75146
O75147
O75150
O75161
O75164
O75170
O75175
O75182
O75197
O75251
O75293
O75298
O75306
O75317
O75326
O75330
O75340
O75362
O75367
O75376
O75379
O75380
O75381
O75382
O75385
O75390
O75394
O75398
O75400
O75410
O75431
O75436
O75438
O75445
O75446
O75448
O75449
O75461
O75473
O75475
O75477
O75478
O75486
O75489
O75496
O75509
O75528
O75529
O75530
O75531
O75533
O75534
O75558
O75578
O75581
O75586
O75593
O75604
O75643
O75665
O75694
O75712
O75717
O75771
O75817
O75818
O75821
O75822
O75832
O75843
O75865
O75874
O75879
O75886
O75899
O75909
O75923
O75925
O75934
O75937
O75940
O75943
O75947
O75955
O75964
O75970
O75971
O76003
O76021
O76031
O76064
O76071
O76081
O88339
O88351
O88368
O88382
O88384
O88441
O88447
O88448
O88457
O88485
O88508
O88509
O88522
O88543
O88544
O88545
O88566
O88572
O88574
O88597
O88621
O88653
O88658
O88689
O88700
O88708
O88712
O88738
O88751
O88809
O88811
O88848
O88871
O88879
O88881
O88890
O88895
O88907
O88935
O88944
O88951
O88983
O88989
O88998
O89079
O89089
O89090
O89109
O94763
O94776
O94777
O94782
O94805
O94826
O94829
O94850
O94864
O94875
O94887
O94905
O94906
O94907
O94913
O94916
O94927
O94992
O95059
O95067
O95071
O95136
O95139
O95149
O95163
O95167
O95168
O95169
O95178
O95182
O95197
O95218
O95219
O95229
O95232
O95239
O95251
O95257
O95267
O95271
O95292
O95295
O95298
O95299
O95347
O95359
O95391
O95400
O95402
O95405
O95425
O95452
O95453
O95456
O95487
O95602
O95613
O95619
O95630
O95639
O95696
O95707
O95714
O95721
O95747
O95750
O95777
O95782
O95786
O95793
O95807
O95817
O95831
O95832
O95835
O95837
O95859
O95863
O95926
O95935
O95970
O95977
O95983
O95985
O95995
O95997
O95999
O96000
O96007
O96008
O96017
O96019
O96033
O97593
O97725
O97758
P00125
P00126
P00129
P00130
P00157
P00158
P00159
P00336
P00339
P00395
P00396
P00403
P00405
P00406
P00414
P00415
P00416
P00423
P00426
P00428
P00429
P00430
P00450
P00480
P00491
P00516
P00519
P00520
P00533
P00739
P00742
P00747
P00749
P00813
P00829
P00846
P00847
P01009
P01011
P01019
P01023
P01024
P01033
P01096
P01100
P01106
P01108
P01112
P01116
P01127
P01137
P01138
P01236
P01270
P01344
P01374
P01375
P01563
P01574
P01588
P01589
P01732
P01871
P02340
P02452
P02463
P02511
P02545
P02550
P02586
P02641
P02643
P02647
P02671
P02675
P02679
P02683
P02698
P02703
P02721
P02730
P02745
P02746
P02747
P02751
P02753
P02766
P02770
P02786
P02787
P02788
P02792
P02794
P03372
P03886
P03887
P03888
P03891
P03892
P03897
P03898
P03899
P03901
P03902
P03905
P03910
P03911
P03915
P03920
P03923
P03924
P03928
P03929
P03950
P04004
P04038
P04049
P04053
P04089
P04141
P04150
P04156
P04177
P04235
P04275
P04394
P04406
P04426
P04441
P04626
P04629
P04632
P04637
P04695
P04774
P04775
P04797
P04843
P04844
P04896
P04897
P04899
P04921
P04925
P04985
P05000
P05019
P05024
P05026
P05027
P05067
P05106
P05107
P05109
P05112
P05132
P05141
P05154
P05164
P05165
P05166
P05198
P05213
P05230
P05305
P05386
P05387
P05388
P05412
P05455
P05480
P05496
P05503
P05504
P05505
P05532
P05546
P05549
P05556
P05622
P05630
P05631
P05632
P05696
P05712
P06211
P06213
P06239
P06240
P06241
P06396
P06400
P06454
P06493
P06536
P06537
P06576
P06702
P06703
P06730
P06734
P06746
P06748
P06756
P06761
P06837
P06865
P06869
P06882
P07174
P07199
P07203
P07237
P07288
P07335
P07355
P07356
P07359
P07384
P07437
P07470
P07471
P07550
P07552
P07602
P07686
P07727
P07737
P07814
P07900
P07901
P07910
P07942
P07947
P07948
P07949
P07992
P07996
P08003
P08047
P08050
P08069
P08081
P08113
P08133
P08138
P08183
P08195
P08207
P08235
P08238
P08246
P08253
P08311
P08413
P08482
P08514
P08579
P08581
P08588
P08621
P08648
P08661
P08670
P08708
P08709
P08752
P08753
P08865
P08908
P08913
P08962
P08F94
P09001
P09012
P09038
P09055
P09086
P09103
P09216
P09217
P09234
P09382
P09405
P09416
P09429
P09450
P09483
P09619
P09622
P09631
P09651
P09661
P09669
P09759
P09803
P09874
P09884
P09936
P09951
P09958
P0C0S5
P0C0T2
P0C6T3
P0CB49
P0CG13
P0CG51
P0DI81
P0DI97
P0DL28
P0DMV8
P0DMV9
P0DMW0
P0DP43
P10037
P10071
P10085
P10103
P10155
P10158
P10175
P10244
P10275
P10276
P10398
P10415
P10417
P10451
P10499
P10600
P10608
P10619
P10636
P10646
P10686
P10719
P10721
P10747
P10809
P10818
P10824
P10827
P10828
P10888
P10911
P11019
P11021
P11023
P11031
P11047
P11103
P11142
P11166
P11171
P11180
P11215
P11240
P11275
P11276
P11308
P11362
P11387
P11388
P11440
P11441
P11442
P11473
P11499
P11507
P11530
P11531
P11608
P11627
P11654
P11688
P11717
P11802
P11831
P11835
P11836
P11881
P11926
P11940
P11942
P11950
P11966
P11980
P11983
P12004
P12018
P12023
P12075
P12111
P12265
P12273
P12277
P12314
P12367
P12368
P12369
P12390
P12637
P12643
P12644
P12755
P12757
P12787
P12813
P12814
P12821
P12830
P12841
P12849
P12931
P12956
P12970
P12979
P13010
P13020
P13073
P13086
P13135
P13182
P13183
P13184
P13271
P13272
P13280
P13405
P13489
P13521
P13569
P13595
P13596
P13612
P13619
P13620
P13621
P13639
P13674
P13679
P13726
P13727
P13832
P13834
P13861
P13864
P13984
P14148
P14173
P14210
P14234
P14373
P14416
P14423
P14602
P14618
P14622
P14625
P14635
P14672
P14678
P14719
P14753
P14780
P14784
P14859
P14866
P14867
P14868
P14869
P14921
P14923
P15018
P15036
P15037
P15056
P15083
P15116
P15169
P15170
P15172
P15208
P15253
P15311
P15314
P15336
P15379
P15382
P15383
P15384
P15385
P15387
P15391
P15431
P15498
P15502
P15509
P15531
P15655
P15690
P15691
P15692
P15806
P15814
P15880
P15884
P15918
P15919
P15923
P15927
P15999
P16036
P16054
P16070
P16083
P16086
P16104
P16144
P16150
P16220
P16233
P16234
P16278
P16298
P16383
P16389
P16402
P16422
P16471
P16520
P16591
P16615
P16885
P16967
P16989
P17156
P17181
P17225
P17252
P17301
P17325
P17426
P17427
P17433
P17535
P17542
P17544
P17568
P17600
P17612
P17659
P17665
P17676
P17679
P17694
P17706
P17787
P17813
P17844
P17858
P17879
P17918
P17931
P17936
P17947
P17955
P17980
P17987
P18052
P18065
P18074
P18077
P18084
P18124
P18146
P18163
P18206
P18265
P18266
P18418
P18433
P18484
P18506
P18507
P18508
P18564
P18614
P18615
P18621
P18654
P18666
P18762
P18827
P18847
P18848
P18858
P18859
P18887
P18901
P19021
P19022
P19024
P19105
P19174
P19182
P19235
P19253
P19320
P19324
P19338
P19367
P19387
P19388
P19397
P19404
P19419
P19438
P19447
P19468
P19483
P19490
P19491
P19492
P19493
P19511
P19536
P19632
P19783
P19784
P19793
P19838
P19969
P20023
P20029
P20042
P20065
P20070
P20073
P20152
P20171
P20226
P20236
P20248
P20333
P20336
P20339
P20417
P20427
P20444
P20585
P20618
P20648
P20651
P20664
P20674
P20700
P20717
P20749
P20781
P20783
P20788
P20794
P20936
P20963
P21127
P21279
P21281
P21282
P21333
P21453
P21571
P21575
P21675
P21677
P21707
P21708
P21709
P21754
P21784
P21793
P21796
P21802
P21810
P21860
P21913
P21917
P21926
P21980
P22002
P22033
P22059
P22087
P22090
P22091
P22288
P22301
P22361
P22366
P22415
P22439
P22455
P22458
P22626
P22646
P22681
P22682
P22725
P22756
P22771
P22777
P22792
P22888
P22892
P23004
P23025
P23204
P23219
P23229
P23246
P23258
P23352
P23385
P23396
P23415
P23438
P23458
P23467
P23475
P23508
P23511
P23528
P23574
P23576
P23611
P23708
P23709
P23726
P23727
P23760
P23763
P23798
P23804
P23819
P23934
P23935
P23956
P24161
P24369
P24385
P24386
P24394
P24468
P24522
P24539
P24587
P24588
P24610
P24821
P24860
P24863
P24864
P24898
P24928
P24941
P25025
P25054
P25101
P25105
P25205
P25206
P25208
P25311
P25322
P25398
P25445
P25490
P25685
P25686
P25705
P25708
P25712
P25786
P25787
P25788
P25789
P25791
P25799
P25801
P25911
P25916
P25961
P25963
P26006
P26010
P26012
P26040
P26051
P26196
P26358
P26367
P26368
P26373
P26439
P26441
P26450
P26572
P26583
P26599
P26641
P26651
P26678
P26718
P26955
P26992
P27038
P27348
P27352
P27361
P27424
P27449
P27467
P27487
P27512
P27540
P27635
P27641
P27659
P27671
P27694
P27695
P27782
P27791
P27797
P27824
P27986
P28023
P28028
P28063
P28066
P28070
P28072
P28074
P28076
P28184
P28221
P28222
P28324
P28331
P28339
P28340
P28360
P28370
P28471
P28482
P28574
P28660
P28676
P28702
P28738
P28741
P28749
P28799
P28867
P29033
P29037
P29067
P29083
P29084
P29101
P29279
P29317
P29353
P29374
P29418
P29419
P29452
P29459
P29460
P29466
P29474
P29475
P29476
P29590
P29594
P29596
P29597
P29754
P29972
P29975
P29992
P29994
P30049
P30050
P30051
P30101
P30121
P30153
P30154
P30260
P30273
P30277
P30279
P30280
P30281
P30285
P30405
P30530
P30561
P30622
P30626
P30658
P30728
P30872
P30874
P30876
P30926
P30999
P31000
P31016
P31039
P31040
P31153
P31266
P31269
P31273
P31323
P31324
P31391
P31399
P31404
P31407
P31408
P31424
P31431
P31503
P31596
P31695
P31749
P31750
P31751
P31785
P31800
P31809
P31938
P31943
P31946
P31976
P31977
P32004
P32120
P32121
P32198
P32551
P32745
P32780
P32850
P32851
P32856
P32871
P32876
P32927
P32969
P33151
P33175
P33176
P33240
P33402
P33436
P33535
P33609
P33610
P33611
P33778
P33991
P33992
P33993
P34056
P34058
P34059
P34080
P34130
P34152
P34741
P34896
P34897
P34900
P34930
P34932
P34942
P34943
P35080
P35171
P35221
P35222
P35226
P35228
P35232
P35235
P35240
P35244
P35249
P35250
P35251
P35268
P35269
P35329
P35343
P35346
P35348
P35354
P35355
P35434
P35435
P35436
P35438
P35439
P35441
P35442
P35456
P35525
P35546
P35550
P35555
P35564
P35568
P35569
P35570
P35579
P35580
P35585
P35601
P35606
P35612
P35613
P35637
P35638
P35659
P35720
P35739
P35858
P35869
P35916
P35918
P35922
P35968
P35969
P35980
P35991
P35998
P36404
P36406
P36507
P36542
P36544
P36578
P36894
P36897
P36941
P36954
P36956
P36957
P37088
P37108
P37173
P37199
P37230
P37238
P37275
P37285
P37287
P37840
P37913
P38159
P38377
P38398
P38432
P38438
P38483
P38570
P38606
P38646
P38650
P38919
P38936
P39019
P39023
P39052
[truncated: 4,132 more rows]

## Sheet: Ribsome
Gene_Symbol
RPS10
RPS11
RPS12
RPS13
RPS14
RPS15
RPS15A
RPS16
RPS17
RPS18
RPS19
RPS19BP1
RPS2
RPS20
RPS21
RPS23
RPS24
RPS25
RPS26
RPS27
RPS27A
RPS27L
RPS28
RPS29
RPS3
RPS3A
RPS5
RPS6
RPS6KA1
RPS6KA2
RPS6KA4
RPS6KA5
RPS6KB1
RPS6KB2
RPS6KC1
RPS6KL1
RPS7
RPS8
RPS9
RPSA
RPL10A
RPL10L
RPL11
RPL12
RPL13
RPL13A
RPL14
RPL15
RPL17
RPL18
RPL18A
RPL19
RPL21
RPL22
RPL22L1
RPL23
RPL23A
RPL24
RPL26
RPL26L1
RPL27
RPL27A
RPL28
RPL29
RPL3
RPL30
RPL31
RPL32
RPL34
RPL35
RPL35A
RPL36
RPL36AL
RPL37
RPL37A
RPL38
RPL39L
RPL3L
RPL4
RPL41
RPL5
RPL6
RPL7
RPL7A
RPL7L1
RPL8
RPL9
RPLP0
RPLP1
RPLP2

## Sheet: HSPA
Gene_Symbol
HSPA5
HSPA8
HSPA9
HSPA2
HSPA12B
HSPA13
HSPA4L
HSPA12A
HSPA4
HSPA6
HSPA14
HSPA1B
HSPA1A
HSPA1L

## Sheet: Spliceosome
Symbol
4930595M18Rik
Aar2
Acin1
Akr1c6
Aqr
BC005624
Bcas2
Bud13
Bud13
Bud31
C1qbp
C1qbp
Cactin
Casc3
Cdc5l
Cdc5l
Cdc40
Cdk13
Celf1
Celf1
Celf1
Celf1
Celf1
Celf2
Celf2
Celf2
Celf2
Celf3
Celf3
Celf3
Celf3
Celf4
Celf4
Celf4
Celf4
Celf4
Celf4
Celf5
Celf5
Celf5
Celf6
Celf6
Cirbp
Clns1a
Coil
Crnkl1
Crnkl1
Crnkl1
Crnkl1
Crnkl1
Cwc15
Cwc15
Cwc22
Cwc22
Cwc25
Cwc25
Cwf19l1
Cwf19l2
Dazap1
Dazap1
Dbr1
Dbr1
Dcps
Ddx5
Ddx5
Ddx5
Ddx5
Ddx17
Ddx17
Ddx17
Ddx17
Ddx17
Ddx20
Ddx20
Ddx23
Ddx39a
Ddx39a
Ddx39b
Ddx39b
Ddx39b
Ddx41
Ddx41
Ddx46
Dhx8
Dhx8
Dhx9
Dhx16
Dhx38
Dhx38
Dyrk1a
Dyrk1a
Eftud2
Eftud2
Eif4a3
Eif4a3
Esrp1
Esrp2
Fam172a
Fmr1
Fmr1
Fmr1
Fxr1
Fxr2
Gcfc2
Gcfc2
Gemin2
Gemin2
Gemin2
Gemin4
Gemin4
Gemin5
Gemin6
Gemin6
Gemin6
Gemin7
Gemin7
Gemin8
Gemin8
Gm3376
Gm4064
Gm7324
Gm9040
Gm9046
Gm9048
Gm9049
Gm10352
Gm13691
Gm13695
Gm21693
Gm21992
Gm29289
Gm32717
Gm45140
Gm45140
Gpkow
Gpkow
Hmx2
Hnrnpa1
Hnrnpa2b1
Hnrnpa2b1
Hnrnpa2b1
Hnrnpc
Hnrnpk
Hnrnpk
Hnrnpl
Hnrnpl
Hnrnpl
Hnrnpm
Hnrnpm
Hnrnpm
Hnrnpu
Hnrnpu
Hspa8
Htatsf1
Ik
Ik
Isy1
Isy1
Jmjd6
Jmjd6
Khdc4
Khdrbs1
Khdrbs1
Khdrbs1
Khdrbs1
Khdrbs1
Khdrbs2
Khdrbs2
Khdrbs2
Khdrbs3
Khdrbs3
Khdrbs3
Khdrbs3
Larp7
Larp7
Lmntd2
Lsm2
Lsm2
Lsm2
Lsm3
Lsm3
Lsm4
Lsm4
Lsm5
Lsm5
Lsm6
Lsm6
Lsm7
Lsm8
Lsm8
Luc7l
Luc7l2
Luc7l3
Magoh
Magohb
Malat1
Mbnl1
Mbnl1
Mbnl1
Mbnl1
Mbnl1
Mbnl1
Mbnl2
Mbnl2
Mbnl2
Mbnl3
Mettl3
Mettl3
Mettl3
Mettl14
Mettl16
Mfap1a
Mfap1b
Myod1
Myod1
Ncbp1
Ncbp1
Ncbp1
Ncbp2
Ncbp2
Ncl
Nol3
Nono
Nova1
Nova1
Nova1
Nova1
Nova2
Nova2
Npm1
Nsrp1
Nup98
Obi1
Paxbp1
Pcbp4
Pcbp4
Phf5a
Phf5a
Plrg1
Plrg1
Ppie
Ppil1
Pqbp1
Pqbp1
Prdx6
Prmt5
Prmt7
Prpf3
Prpf3
Prpf3
Prpf4
Prpf4
Prpf4
Prpf4b
Prpf6
Prpf6
Prpf6
Prpf6
Prpf8
Prpf8
Prpf8
Prpf8
Prpf18
Prpf19
Prpf19
Prpf19
Prpf19
Prpf19
Prpf31
Prpf31
Prpf31
Prpf38a
Prpf39
Prpf40a
Prpf40a
Prpf40b
Prpf40b
Psip1
Pspc1
Ptbp1
Ptbp1
Ptbp1
Ptbp1
Ptbp2
Ptbp2
Ptbp3
Puf60
Puf60
Puf60
Qk
Raver1
Raver2
Rbfox1
Rbfox1
Rbfox2
Rbfox2
Rbfox2
Rbfox2
Rbfox2
Rbfox2
Rbfox3
Rbfox3
Rbfox3
Rbfox3
Rbm3
Rbm4
Rbm4
Rbm4
Rbm4b
Rbm5
Rbm5
Rbm5
Rbm6
Rbm7
Rbm8a
Rbm8a
Rbm10
Rbm10
Rbm10
Rbm11
Rbm11
Rbm14
Rbm15
Rbm15
Rbm15
Rbm15b
Rbm15b
Rbm15b
Rbm17
Rbm17
Rbm17
Rbm19
Rbm22
Rbm24
Rbm24
Rbm25
Rbm39
Rbm41
Rbm42
Rbmx
Rbmx
Rbmx
Rbmx2
Rbmx2
Rbmxl1
Rbmxl1
Rbmxl1
Rbmxl1
Rbmxl1
Rbmxl2
Rbmy
Rest
Rnf113a2
Rnpc3
Rnps1
Rnps1
Rnps1
Rnu4atac
Rnu6atac
Rsrc1
Rsrc1
Rsrc1
Sart1
Sart1
Sart3
Sart3
Sart3
Sart3
Scaf11
Scaf11
Scnm1
Setx
Sf1
Sf1
Sf3a1
Sf3a1
Sf3a2
Sf3a2
Sf3a3
Sf3a3
Sf3a3
Sf3b1
Sf3b1
Sf3b1
Sf3b2
Sf3b2
Sf3b3
Sf3b3
Sf3b4
Sf3b4
Sf3b4
Sf3b5
Sf3b5
Sf3b6
Sf3b6
Sf3b6
Sfpq
Sfpq
Sfpq
Sfswap
Sfswap
Sfswap
Sfswap
Slc39a5
Slu7
Slu7
Slu7
Smn1
Smu1
Snip1
Snrnp25
Snrnp35
Snrnp70
Snrnp70
Snrnp70
Snrnp200
Snrnp200
Snrpa
Snrpa1
Snrpa1
Snrpb
Snrpb
Snrpb
Snrpb2
Snrpb2
Snrpc
Snrpc
Snrpc
Snrpd1
Snrpd1
Snrpd1
Snrpd2
Snrpd2
Snrpd2
Snrpd3
Snrpd3
Snrpd3
Snrpe
Snrpe
Snrpf
Snrpf
Snrpf
Snrpg
Snrpg
Snrpn
Snu13
Snu13
Snw1
Snw1
Son
Son
Spen
Srpk1
Srpk2
Srpk2
Srpk2
Srpk3
Srrm1
Srrm4
Srrm4
Srrm4
Srsf1
Srsf1
Srsf1
Srsf1
Srsf1
Srsf2
Srsf2
Srsf3
Srsf3
Srsf4
Srsf4
Srsf5
Srsf6
Srsf6
Srsf6
Srsf6
Srsf6
Srsf6
Srsf6
Srsf7
Srsf7
Srsf9
Srsf9
Srsf9
Srsf10
Srsf10
Srsf10
Srsf10
Srsf10
Srsf10
Srsf10
Srsf12
Srsf12
Strap
Strap
Strap
Strap
Syf2
Tdrd6
Tfip11
Tfip11
Tfip11
Thrap3
Thrap3
Tia1
Tra2a
Tra2a
Tra2a
Tra2b
Tra2b
Tra2b
Tra2b
Tra2b
Tra2b
Tra2b
Txnl4a
Txnl4b
U2af1
U2af1l4
U2af2
U2af2
Ubl5
Ubl5b
Usp4
Usp39
Usp39
Usp49
Wbp4
Wbp4
Wbp11
Wdr83
Wtap
Wtap
Xab2
Xab2
Xab2
Yju2
Ythdc1
Ythdc1
Ythdc1
Ythdc1
Ythdc1
Ythdc1
Ythdc1
Zbtb7a
Zc3h10
Zcrb1
Zfp64
Zmat2
Zmat2
Zrsr1
Zrsr1
Zrsr2
Zrsr2
Zrsr2

## Sheet: Autophagy
Symbol
1600014C10Rik
1700034I23Rik
Abl1
Acbd5
Acbd5
Acer2
Adra1a
Adrb2
Adrb2
Ager
Akt1
Ambra1
Ambra1
Ambra1
Ambra1
Ambra1
Ambra1
Anxa7
Arfip2
Arl8b
Arsa
Arsb
Atf6
Atg2a
Atg2a
Atg2a
Atg2a
Atg2a
Atg2a
Atg2a
Atg2a
Atg2b
Atg2b
Atg2b
Atg2b
Atg2b
Atg2b
Atg2b
Atg3
Atg3
Atg3
Atg3
Atg3
Atg3
Atg3
Atg4b
Atg4b
Atg4c
Atg4c
Atg4d
Atg5
Atg5
Atg5
Atg5
Atg5
Atg5
Atg5
Atg5
Atg5
Atg5
Atg5
Atg5
Atg5
Atg5
Atg5
Atg7
Atg7
Atg7
Atg7
Atg7
Atg7
Atg7
Atg7
Atg7
Atg7
Atg7
Atg7
Atg7
Atg7
Atg7
Atg7
Atg7
Atg7
Atg7
Atg7
Atg7
Atg7
Atg7
Atg7
Atg7
Atg7
Atg9a
Atg9a
Atg9a
Atg9a
Atg9a
Atg9a
Atg9a
Atg9b
Atg9b
Atg9b
Atg9b
Atg9b
Atg9b
Atg10
Atg10
Atg12
Atg12
Atg12
Atg12
Atg12
Atg12
Atg13
Atg13
Atg13
Atg13
Atg13
Atg13
Atg13
Atg13
Atg14
Atg14
Atg14
Atg14
Atg14
Atg14
Atg14
Atg16l1
Atg16l1
Atg16l1
Atg16l1
Atg16l1
Atg16l1
Atg16l1
Atg16l2
Atg16l2
Atg101
Atg101
Atg101
Atg101
Atm
Atm
Atp2a2
Atp2a2
Atp6v0a1
Atp13a2
Atp13a2
Atp13a2
Atp13a2
Atp13a2
Atp13a2
Atp13a2
Atp13a2
Atpif1
Aup1
Bag3
Bag3
Bag3
Bcl2
Bcl2
Bcl2l11
Becn1
Becn1
Becn1
Becn1
Becn1
Becn1
Becn1
Becn1
Becn1
Becn1
Becn1
Becn1
Becn1
Becn1
Becn1
Becn1
Becn2
Becn2
Becn2
Bid
Bmf
Bmf
Bmf
Bnip3
Bnip3
Bnip3l
Bnip3l
Bok
C9orf72
C9orf72
C9orf72
C9orf72
C9orf72
C9orf72
Calcoco2
Calcoco2
Calcoco2
Capn10
Casp1
Cd84
Cdc37
Cdkn2a
Chmp4b
Chmp4b
Chmp4b
Cisd2
Cisd2
Cisd2
Cisd2
Clec16a
Clec16a
Clec16a
Clec16a
Clec16a
Clec16a
Cln3
Cln3
Cln3
Cln3
Cln3
Cln3
Cltc
Clu
Cptp
Ctsa
Ctsa
Ctsd
Cttn
Dap
Dap
Dap
Dapk1
Dapl1
Dcaf12
Dcn
Dcn
Ddit3
Ddit3
Ddrgk1
Depdc5
Depp1
Depp1
Depp1
Dhrsx
Dhrsx
Dnm1l
Dnm1l
Dram1
Dram1
Dram1
Dram2
Dram2
Dram2
Drd2
Drd3
Ehmt2
Ei24
Ei24
Eif2ak4
Eif4g1
Eif4g2
Elapor1
Elapor1
Elapor1
Elapor1
Emc6
Emc6
Epg5
Epg5
Epg5
Epm2a
Epm2a
Epm2a
Epm2a
Epm2a
Ercc4
Eva1a
Fbxl2
Fbxo7
Fbxo7
Fbxo7
Fbxo7
Fbxw7
Fbxw7as1
Fez1
Fez2
Fis1
Fis1
Flcn
Fnbp1l
Foxk1
Foxk2
Foxo1
Foxo1
Foxo3
Fundc1
Fundc1
Fundc1
Fundc2
Fyco1
Fyco1
Gabarap
Gabarap
Gabarap
Gabarap
Gabarapl1
Gabarapl1
Gabarapl1
Gabarapl1
Gabarapl2
Gabarapl2
Gabarapl2
Gabarapl2
Gata4
Gba
Gba
Gba
Gba
Gba
Gfap
Gfap
Gnai3
Golga2
Gopc
Gpr137
Gpr137
Gpr137b
Gpr137b
Gpsm1
Gramd1a
Gsk3a
Gsk3a
Gsk3b
Gsk3b
Hap1
Hdac6
Hdac6
Hdac6
Hdac10
Hdac10
Herc1
Hif1a
Hif1a
Hif1a
Hk2
Hmgb1
Hmgb1
Hmox1
Hmox1
Hspa8
Hspa8
Hspa8
Hspa8
Hspa8
Hspa8
Hspb8
Htr2b
Htra2
Htt
Htt
Htt
Huwe1
Ifng
Ift20
Ift88
Iigp1
Ikbkg
Il3
Il4
Il4
Il4
Il10
Il10ra
Ilrun
Irf8
Irgm1
Irgm1
Irgm1
Irgm1
Irgm2
Irgm2
Irgm2
Irgm2
Irgm2
Itgb4
Kat5
Kat5
Kat8
Kdm4a
Kdr
Keap1
Keap1
Klhl22
Lamp2
Lamp2
Lamp2
Lamp2
Lamp2
Lamp2
Lamp2
Lamp2
Lamp2
Lamp2
Lamp2
Lamp3
Larp1
Lep
Lep
Lepr
Lgals8
Lgals8
Lix1
Lix1l
Lmx1b
Lrrk2
Lrrk2
Lrrk2
Lrrk2
Lrrk2
Lrrk2
Lrrk2
Lrrk2
Lrsam1
Lrsam1
Lrsam1
Lzts1
Map1lc3a
Map1lc3a
Map1lc3a
Map1lc3a
Map1lc3a
Map1lc3a
Map1lc3a
Map1lc3a
Map1lc3a
Map1lc3a
Map1lc3b
Map1lc3b
Map1lc3b
Map1lc3b
Map1lc3b
Map1lc3b
Map1lc3b
Map1lc3b
Map1lc3b
Map1lc3b
Map2k1
Map3k7
Mapk3
Mapk15
Mapt
Mcl1
Mcoln1
Mefv
Mfn2
Mfn2
Mfn2
Mfsd8
Mfsd8
Mid2
Mt3
Mtcl1
Mtdh
Mtm1
Mtm1
Mtmr3
Mtmr3
Mtmr4
Mtmr9
Mtmr9
Mtor
Mtor
Mtor
Mtor
Mtor
Mtor
Mtor
Mtor
Mul1
Myo5a
Nampt
Nbr1
Nbr1
Nhlrc1
Nlrp6
Nod1
Nod2
Npc1
Npc1
Npc1
Nprl2
Nprl2
Nprl3
Nrbf2
Nrbf2
Nrbf2
Nsfl1c
Nupr1
Nupr1
Nupr1
Optn
Optn
Optn
Optn
Optn
Ormdl3
Ormdl3
Pacs2
Pacs2
Pafah1b2
Park7
Parl
Phb2
Phb2
Phb2
Phf23
Phf23
Phf23
Phf23
Phf23
Pik3c2a
Pik3c2a
Pik3c2a
Pik3c2b
Pik3c2b
Pik3c3
Pik3c3
Pik3c3
Pik3c3
Pik3c3
Pik3c3
Pik3c3
Pik3cb
Pik3r2
Pik3r4
Pik3r4
Pikfyve
Pim2
Pim2
Pink1
Pink1
Pink1
Pink1
Pink1
Pink1
Pink1
Pink1
Pink1
Pip4k2a
Pip4k2a
Pip4k2a
Pip4k2a
Pip4k2b
Pip4k2b
Pip4k2b
Pip4k2b
Pip4k2c
Pip4k2c
Pjvk
Plaa
Plekhf1
Plekhm1
Plekhm1
Plk2
Plk3
Pmp22
Pmp22
Poldip2
Prkaa1
Prkaa1
Prkaa1
Prkaa2
Prkaa2
Prkaa2
Prkd1
Prkn
Prkn
Prkn
Prkn
Prkn
Prkn
Prkn
Prkn
Prkn
Prkn
Prkn
Psen1
Psen1
Ptk2
Ptk2
Ptpn22
Ptpn22
Pycard
Qsox1
Rab1a
Rab1a
Rab1a
Rab1b
Rab1b
Rab1b
Rab3gap1
Rab3gap2
Rab7
Rab7
Rab7
Rab8a
Rab8a
Rab12
Rab12
Rab19
Rab23
Rab23
Rab24
Rab33b
Rab33b
Rab39
Rab39b
Rab39b
Rab43
Ralb
Rasip1
Rb1cc1
Rb1cc1
Rb1cc1
Rb1cc1
Rb1cc1
Rb1cc1
Rb1cc1
Rb1cc1
Rb1cc1
Rb1cc1
Rb1cc1
Retreg1
Retreg1
Retreg1
Retreg1
Retreg1
Retreg3
Ripk2
Rmc1
Rmc1
Rmc1
Rnf5
Rnf5
Rnf41
Rnf41
Rnf152
Rnf152
Rnf152
Rnf166
Rnf185
Rock1
Rptor
Rraga
Rraga
Rragb
Rragc
Rragd
Rubcn
Rubcn
Rubcn
Rubcn
Rubcnl
Rubcnl
Rubcnl
Rubcnl
Rubcnl
Rubcnl
Rubcnl
Rubcnl
Rufy4
Rufy4
Rufy4
Rufy4
Rufy4
S100a8
S100a9
Sbf2
Scfd1
Scoc
Sec16a
Sec16b
Sec22b
Sesn1
Sesn2
Sesn2
Sesn2
Sesn3
Sh3bp4
Sh3glb1
Sh3glb1
Sh3glb1
Sh3glb1
Sirt1
Sirt1
Sirt2
Sirt2
Slc25a4
Slc25a5
Slc25a46
Smcr8
Smcr8
Smcr8
Smcr8
Smcr8
Smcr8
Smg1
Smurf1
Smurf1
Smurf1
Smurf1
Snap29
Snap29
Snap29
Snapin
Snapin
Snca
Snx14
Soga1
Soga3
Spata18
Spata18
Sptlc1
Sptlc2
Sqstm1
Sqstm1
Sqstm1
Sqstm1
Sqstm1
Sqstm1
Sqstm1
Sqstm1
Srebf1
Srpx
Stat3
Stbd1
Stbd1
Sting1
Sting1
Sting1
Sting1
Sting1
Sting1
Sting1
Sting1
Sting1
Stk11
Stk11
Stub1
Stx12
Stx17
Stx17
Stx17
Stx17
Supt5
Svip
Svip
Synpo2
Synpo2
Syt11
Syt11
Taz
Taz
Tbc1d5
Tbc1d5
Tbc1d12
Tbc1d14
Tbc1d14
Tbc1d14
Tbc1d17
Tbc1d25
Tbc1d25
Tbc1d25
Tbk1
Tbk1
Tcirg1
Tcirg1
Tcirg1
Tecpr1
Tecpr1
Tecpr1
Tex264
Tex264
Tfeb
Tfeb
Tgfbrap1
Ticam1
Tigar
Tigar
Tlr2
Tlr9
Tm9sf1
Tmbim6
Tmem39a
Tmem39a
Tmem39a
Tmem39a
Tmem39a
Tmem41b
Tmem41b
Tmem59
Tmem59
Tmem59
Tmem74
Tmem74
Tmem74
Tmem150b
Tmem208
Tnfaip3
Tollip
Tomm7
Tpcn1
Tpcn2
Trappc4
Trappc8
Trappc8
Trem2
Trem2
Trib3
Trim5
Trim6
Trim8
Trim12a
Trim12a
Trim12c
Trim13
Trim13
Trim14
Trim17
Trim21
Trim21
Trim27
Trim30a
Trim30b
Trim30c
Trim30d
Trim34a
Trim34b
Trim38
Trim65
Trim65
Trim68
Triml1
Triml2
Trp53
Trp53
Trp53inp1
Trp53inp1
Trp53inp1
Trp53inp1
Trp53inp2
Trp53inp2
Trp53inp2
Trp53inp2
Trp53inp2
Tsc1
Tsc1
Tsc2
Tsc2
Tsc2
Tsc2
Tsc2
Tspo
Uba5
Ubqln1
Ubqln1
Ubqln1
Ubqln1
Ubqln1
Ubqln1
Ubqln1
Ubqln2
Ubqln2
Ubqln2
Ubqln2
Ubqln2
Ubqln4
Ubqln4
Ubxn2a
Ubxn2b
Ubxn6
Ufc1
Ufl1
Ufl1
Ufm1
Ulk1
Ulk1
Ulk1
Ulk1
Ulk1
Ulk1
Ulk1
Ulk1
Ulk1
Ulk1
Ulk1
Ulk1
Ulk1
Ulk1
Ulk1
Ulk1
Ulk1
Ulk2
Ulk2
Ulk2
Ulk2
Ulk2
Ulk2
Ulk2
Ulk2
Ulk3
Ulk3
Umod
Usp10
Usp10
Usp10
Usp13
Usp13
Usp30
Usp30
Usp33
Usp36
Uvrag
Uvrag
Vamp8
Vamp8
Vamp8
Vcp
Vcp
Vcp
Vcp
Vdac1
Vdac1
Vmp1
Vmp1
Vmp1
Vmp1
Vmp1
Vmp1
Vps4a
Vps4b
Vps11
Vps13a
Vps13a
Vps13c
Vps13d
Vps16
Vps16
Vps18
Vps33a
Vps33a
Vps39
Vps39
Vps39
Vps41
Vps41
Vps51
Vti1a
Wac
Washc1
Wdfy3
Wdfy3
Wdfy4
Wdr6
Wdr24
Wdr24
Wdr41
Wdr41
Wdr45
Wdr45
Wdr45
Wdr45
Wdr45
Wdr45b
Wdr45b
Wdr45b
Wdr45b
Wdr45b
Wdr81
Wipi1
Wipi1
Wipi1
Wipi1
Wipi1
Wipi1
Wipi2
Wipi2
Wipi2
Wipi2
Wipi2
Wipi2
Wipi2
Wipi2
Wipi2
Wipi2
Xbp1
Xbp1
Xbp1
Xpa
Yod1
Zc3h12a
Zc3h12a
Zfyve1
Zkscan3
Zkscan3
Zmpste24

## Sheet: CellCycle
Symbol
1700013H16Rik
1700028K03Rik
1700028K03Rik
1700040F15Rik
2610002M06Rik
3830403N18Rik
4930447C04Rik
4930447C04Rik
4930447C04Rik
4930447C04Rik
4930447C04Rik
Aaas
Aatf
Abcb1a
Abl1
Abl1
Abl1
Abl1
Abraxas1
Abraxas1
Abraxas1
Abraxas2
Abraxas2
Abraxas2
Abraxas2
Abraxas2
Abraxas2
Actb
Actb
Actr2
Actr2
Actr2
Actr2
Actr3
Actr3
Actr3
Actr3
Actr8
Acvr1
Acvr1b
Adam17
Adam17
Adamts1
Adarb1
Adcyap1
Afap1l2
Afap1l2
Ago4
Ago4
Ahctf1
Ahctf1
Ahr
Aicda
Aif1
Ajuba
Ak1
Akap8
Akap8
Akap8
Akap8l
Akap8l
Akt1
Akt1
Alkbh4
Alms1
Alox8
Anapc1
Anapc1
Anapc2
Anapc4
Anapc4
Anapc4
Anapc5
Anapc5
Anapc7
Anapc7
Anapc7
Anapc10
Anapc11
Anapc11
Anapc13
Anapc15
Anapc15
Anapc16
Angel2
Ank3
Ankk1
Ankk1
Ankle2
Ankle2
Ankrd17
Ankrd17
Ankrd31
Ankrd31
Ankrd31
Ankrd53
Ankrd53
Ankrd53
Ankrd53
Ankrd53
Ankrd53
Ankrd53
Anln
Anln
Anln
Anln
Anp32b
Anp32b
Anxa1
Anxa1
Anxa11
Anxa11
Anxa11
Apbb1
Apbb2
Apc
Apc
Apc
Apc
Apc
Apc
Apc
Apc
Apc
Apc
Apc
Apc
Apc
Apex1
Apex2
App
App
Appl1
Appl1
Appl2
Appl2
Arf1
Arf6
Arhgef2
Arhgef2
Arhgef10
Arhgef10
Arhgef10
Arl2
Arl2
Arl3
Arl3
Arl8a
Arl8b
Arntl
Arpp19
Arpp19
Arpp19
Asah2
Ascl1
Ascl1
Asns
Aspm
Aspm
Aspm
Aspm
Aspm
Asz1
Asz1
Atad5
Atad5
Atad5
Atf2
Atf5
Atf5
Atf5
Atm
Atm
Atm
Atm
Atm
Atm
Atm
Atm
Atm
Atm
Atm
Atp2b4
Atr
Atr
Atr
Atrip
Atrx
Atrx
Atrx
Atrx
Aunip
Aunip
Aurka
Aurka
Aurka
Aurka
Aurka
Aurka
Aurka
Aurka
Aurka
Aurka
Aurka
Aurka
Aurka
Aurka
Aurkb
Aurkb
Aurkb
Aurkb
Aurkb
Aurkb
Aurkb
Aurkb
Aurkb
Aurkb
Aurkc
Aurkc
Aurkc
Aurkc
Aurkc
Aurkc
Aven
Avpi1
Axin2
Axin2
AY074887
Azi2
Azin1
Babam1
Babam1
Babam2
Babam2
Bach1
Bach1
Bag6
Bak1
Banp
Bap1
Bax
Bbs4
Bbs4
Bbs4
BC004004
BC034090
Bccip
Bccip
Bccip
Bccip
Bccip
Bccip
Bcl2
Bcl2
Bcl2
Bcl2
Bcl2
Bcl2l1
Bcl2l1
Bcl2l11
Bcl2l11
Bcr
Becn1
Becn1
Becn1
Becn1
Bex2
Bex4
Bid
Bin1
Bin3
Bin3
Birc2
Birc2
Birc3
Birc5
Birc5
Birc5
Birc5
Birc5
Birc5
Birc5
Birc5
Birc5
Birc6
Birc6
Birc7
Blcap
Blm
Blm
Bmp2
Bmp4
Bmp4
Bmp7
Bmp7
Bnip2
Bod1
Bod1
Bod1
Bod1
Boll
Bop1
Bora
Bora
Bora
Bora
Bora
Brca1
Brca1
Brca1
Brca1
Brca1
Brca1
Brca1
Brca2
Brca2
Brca2
Brca2
Brca2
Brca2
Brca2
Brca2
Brcc3
Brcc3
Brd4
Brd4
Brd7
Brd7
Brdt
Brdt
Brdt
Brdt
Brinp1
Brinp1
Brinp1
Brinp1
Brinp1
Brinp2
Brinp2
Brinp2
Brinp2
Brinp2
Brinp3
Brinp3
Brinp3
Brinp3
Brinp3
Brip1
Brip1
Brip1
Brip1
Brip1
Brme1
Brme1
Brme1
Brsk1
Brsk1
Brsk1
Brsk1
Brsk2
Brsk2
Btbd18
Btc
Btc
Btc
Btg1
Btg1b
Btg1c
Btg2
Btg3
Btg3
Btg4
Btg4
Btn2a2
Btrc
Bub1
Bub1
Bub1
Bub1
Bub1
Bub1b
Bub1b
Bub1b
Bub1b
Bub3
Bub3
Bub3
Bub3
Bub3
C2cd3
C2cd3
Cables1
Cables1
Cables1
Cables2
Cables2
Cacnb4
Cacul1
Cacul1
Calm1
Calm2
Calm3
Calr
Calr
Calr
Calr
Camk1
Camk2a
Camk2b
Camk2b
Camk2d
Camk2d
Camk2g
Camk2n1
Camk2n1
Capn3
Casp2
Casp3
Casp3
Casp8ap2
Cast
Ccar1
Ccar2
Ccar2
Ccdc8
Ccdc8
Ccdc57
Ccdc57
Ccdc57
Ccdc61
Ccdc84
Ccdc124
Ccl12
Ccn2
Ccna1
Ccna1
Ccna1
Ccna1
Ccna2
Ccna2
Ccna2
Ccna2
Ccna2
Ccnb1
Ccnb1
Ccnb1
Ccnb1
Ccnb1
Ccnb1
Ccnb1
Ccnb1
Ccnb1
Ccnb1
Ccnb1
Ccnb1ip1
Ccnb1ip1
Ccnb1ip1
Ccnb1ip1
Ccnb1ip1
Ccnb2
Ccnb2
Ccnb2
Ccnb2
Ccnb2
Ccnb2
Ccnb2
Ccnb3
Ccnb3
Ccnb3
Ccnb3
Ccnb3
Ccnd1
Ccnd1
Ccnd1
Ccnd1
Ccnd1
Ccnd1
Ccnd1
Ccnd1
Ccnd1
Ccnd1
Ccnd1
Ccnd1
Ccnd1
Ccnd2
Ccnd2
Ccnd2
Ccnd2
Ccnd2
Ccnd2
Ccnd2
Ccnd2
Ccnd3
Ccnd3
Ccnd3
Ccnd3
Ccnd3
Ccnd3
Ccndbp1
Ccndbp1
Ccne1
Ccne1
Ccne1
Ccne1
Ccne1
Ccne1
Ccne1
Ccne1
Ccne2
Ccne2
Ccne2
Ccne2
Ccne2
Ccne2
Ccne2
Ccnf
Ccnf
Ccnf
Ccnf
Ccnf
Ccnf
Ccng1
Ccng1
Ccng1
Ccng1
Ccng1
Ccng2
Ccng2
Ccng2
Ccng2
Ccnh
Ccnh
Ccni
Ccni
Ccni
Ccnj
Ccnj
Ccnjl
Ccnjl
Ccnk
Ccnl1
Ccnl2
Ccno
Ccno
Ccno
Ccno
Ccnt1
Ccnt2
Ccny
Ccny
Ccny
Ccny
Ccny
Ccnyl1
Ccp110
Ccp110
Ccp110
Ccp110
Ccp110
Ccpg1
Ccpg1
Ccsap
Ccsap
Ccsap
Cd2ap
Cd28
Cdc5l
Cdc5l
Cdc5l
Cdc6
Cdc6
Cdc6
Cdc6
Cdc6
Cdc6
Cdc7
Cdc7
Cdc7
Cdc7
Cdc14a
Cdc14a
Cdc14a
Cdc14a
Cdc14a
Cdc14b
Cdc14b
Cdc14b
Cdc14b
Cdc14b
Cdc14b
Cdc16
Cdc16
Cdc16
Cdc20
Cdc20
Cdc20
Cdc20
Cdc23
Cdc23
Cdc23
Cdc23
Cdc23
Cdc23
Cdc25a
Cdc25a
Cdc25a
Cdc25a
Cdc25a
Cdc25a
Cdc25b
Cdc25b
Cdc25b
Cdc25b
Cdc25b
Cdc25b
Cdc25b
Cdc25b
Cdc25b
Cdc25c
Cdc25c
Cdc25c
Cdc25c
Cdc25c
Cdc25c
Cdc26
Cdc26
Cdc26
Cdc27
Cdc27
Cdc27
Cdc34
Cdc42
Cdc45
Cdc45
Cdc73
Cdc73
Cdc73
Cdc123
Cdca2
Cdca3
Cdca5
Cdca5
Cdca5
Cdca5
Cdca5
Cdca5
Cdca5
Cdca5
Cdca5
Cdca5
Cdca5
Cdca5
Cdca5
Cdca8
Cdca8
Cdca8
Cdk1
Cdk1
Cdk1
Cdk1
Cdk1
Cdk1
Cdk1
Cdk2
Cdk2
Cdk2
Cdk2
Cdk2
Cdk2
Cdk2
Cdk2ap2
Cdk4
Cdk4
Cdk4
Cdk4
Cdk4
Cdk4
Cdk5
Cdk5
Cdk5
Cdk5r1
Cdk5r2
Cdk5rap1
Cdk5rap1
Cdk5rap1
Cdk5rap1
Cdk5rap2
Cdk5rap2
Cdk5rap2
Cdk5rap2
Cdk5rap2
Cdk5rap2
Cdk5rap2
Cdk5rap2
Cdk5rap2
Cdk5rap2
Cdk5rap3
Cdk5rap3
Cdk5rap3
Cdk5rap3
Cdk5rap3
Cdk5rap3
Cdk6
Cdk6
Cdk6
Cdk7
Cdk8
Cdk9
Cdk10
Cdk11b
Cdk11b
Cdk11b
Cdk14
Cdk14
Cdk14
Cdk15
Cdk16
Cdk17
Cdk18
Cdk20
Cdkl2
Cdkl4
Cdkn1a
Cdkn1a
Cdkn1a
Cdkn1a
Cdkn1a
Cdkn1a
Cdkn1a
Cdkn1a
Cdkn1a
Cdkn1a
Cdkn1a
Cdkn1a
Cdkn1a
Cdkn1a
Cdkn1a
Cdkn1a
Cdkn1b
Cdkn1b
Cdkn1b
Cdkn1b
Cdkn1b
Cdkn1b
Cdkn1b
Cdkn1b
Cdkn1b
Cdkn1b
Cdkn1b
Cdkn1b
Cdkn1b
Cdkn1b
Cdkn1b
Cdkn1b
Cdkn1b
Cdkn1b
Cdkn1b
Cdkn1b
Cdkn1c
Cdkn1c
Cdkn1c
Cdkn1c
Cdkn1c
Cdkn1c
Cdkn2a
Cdkn2a
Cdkn2a
Cdkn2a
Cdkn2a
Cdkn2a
Cdkn2a
Cdkn2a
Cdkn2a
Cdkn2a
Cdkn2b
Cdkn2b
Cdkn2b
Cdkn2b
Cdkn2b
Cdkn2b
Cdkn2b
Cdkn2c
Cdkn2c
Cdkn2c
Cdkn2c
Cdkn2c
Cdkn2d
Cdkn2d
Cdkn2d
Cdkn2d
Cdkn2d
Cdkn3
Cdkn3
Cdkn3
Cdt1
Cdt1
Cdt1
Cdt1
Cdt1
Cdt1
Cdt1
Cdt1
Cdt1
Cdt1
Cdt1
Cebpa
Celf1
Cenpa
Cenpa
Cenpc1
Cenpc1
Cenpc1
Cenpc1
Cenpe
Cenpe
Cenpe
Cenpe
Cenpe
Cenpe
Cenpe
Cenpe
Cenpe
Cenpe
Cenpe
Cenpe
Cenpe
Cenpe
Cenpe
Cenpe
Cenpe
Cenpe
Cenpf
Cenpf
Cenpf
Cenpf
Cenpf
Cenpf
Cenph
Cenph
Cenpj
Cenpj
Cenpj
Cenpj
Cenpj
Cenpj
Cenpj
Cenpj
Cenpk
Cenpq
Cenpq
Cenps
Cenps
Cenpt
Cenpt
Cenpt
Cenpv
Cenpv
Cenpv
Cenpv
Cenpw
Cenpw
Cenpw
Cenpx
Cenpx
Cenpx
Cep44
Cep44
Cep44
Cep55
Cep55
Cep55
Cep55
Cep63
Cep63
Cep63
Cep63
Cep63
Cep63
Cep63
Cep63
Cep68
Cep68
Cep72
Cep72
Cep76
Cep85
Cep97
Cep120
Cep120
Cep120
Cep120
Cep120
Cep120
Cep126
Cep131
Cep131
Cep131
Cep135
Cep135
Cep152
Cep152
Cep152
Cep164
Cep192
Cep192
Cep192
Cep192
Cep192
Cep192
Cep250
Cep250
Cep250
Cep250
Cep295
Cep295
Cep295
Cep295
Cep295nl
Cetn1
Cetn1
Cetn1
Cetn2
Cetn2
Cetn2
Cetn2
Cetn2
Cetn3
Cetn4
Cetn4
Cfl1
Cfl1
Cgref1
Cgref1
Cgrrf1
Cgrrf1
Chaf1a
Chaf1b
Champ1
Champ1
Champ1
Champ1
Chd3
Chd3
Chek1
Chek1
Chek1
Chek1
Chek1
Chek1
Chek1
Chek1
Chek1
Chek1
Chek1
Chek1
Chek2
Chek2
Chek2
Chek2
Chek2
Chek2
Chek2
Chek2
Chfr
Chfr
Chfr
Chfr
Chfr
Chmp1a
Chmp1a
Chmp1a
Chmp1a
Chmp1a
Chmp1a
Chmp1a
Chmp1b
Chmp1b
Chmp1b
Chmp1b
Chmp1b
Chmp2a
Chmp2a
Chmp2a
Chmp2a
Chmp2a
Chmp2a
Chmp2b
Chmp2b
Chmp2b
Chmp2b
Chmp3
Chmp3
Chmp3
Chmp3
Chmp4b
Chmp4b
Chmp4b
Chmp4b
Chmp4b
Chmp4b
Chmp4c
Chmp4c
Chmp4c
Chmp4c
Chmp4c
Chmp4c
Chmp5
Chmp5
Chmp5
Chmp5
Chmp6
Chmp6
Chmp7
Chmp7
Chmp7
Chordc1
Chordc1
Chtf18
Chtf18
Chtf18
Cib1
Cib1
Cinp
Cirbp
Cit
Cit
Cit
Cit
Cit
Cit
Cit
Cit
Cit
Cited2
Ckap2
Ckap2
Ckap5
Ckap5
Ckap5
Ckap5
Ckap5
Cks1b
Cks1b
Cks1b
Cks1brt
Cks2
Cks2
Cks2
Cks2
Clasp1
Clasp1
Clasp1
Clasp1
Clasp1
Clasp1
Clasp1
Clasp1
Clasp2
Clasp2
Clasp2
Clasp2
Clasp2
Clasp2
Clgn
Clic1
Clock
Clspn
Clspn
Clspn
Clspn
Clspn
Clspn
Clspn
Clta
Cltc
Cltc
Cltc
Cltc
Cltc
Cltc
Cnppd1
Cntd1
Cntd1
Cntln
Cntln
Cntrl
Cntrob
Cntrob
Cntrob
Cntrob
Cntrob
Cntrob
Cntrob
Cops5
Cpeb1
Cpeb1
Cradd
Cradd
Crebbp
Crlf3
Crlf3
Crnn
Crnn
Crocc
Crocc
Crocc
Cry1
Csnk1a1
Csnk1d
Csnk1d
Csnk2a1
Csnk2a1
Csnk2a1
Csnk2a2
Csnk2a2
Csnk2a2
Csnk2a2
Csnk2a2
Cspp1
Cspp1
Ctbp1
Ctc1
Ctdp1
Ctdp1
Ctdsp1
Ctdsp2
Ctdspl
Ctnnb1
Ctnnb1
Ctnnb1
Ctnnb1
Cts7
Cts7
Cul3
Cul3
Cul3
Cul3
Cul3
Cul3
Cul4a
Cul4a
Cul4b
Cul4b
Cul7
Cul7
Cul7
Cul9
Cul9
Cuzd1
Cxcr5
Cyld
Cyld
Cyp1a1
Cyp26b1
Cyp27b1
D7Ertd443e
D7Ertd443e
Dab2ip
Dab2ip
Dab2ip
Dach1
Dact1
Dapk3
Daxx
Dazl
Dazl
Dbf4
Dbf4
Dbf4
Dbf4
Dclre1a
Dclre1b
Dctn1
Dctn1
Dctn1
Dctn1
Dctn1
Dctn2
Dctn2
Dctn2
Dctn2
Dctn2
Dctn3
Dctn3
Dctn3
Dctn6
Dctn6
Dcun1d3
Dcun1d3
Ddb1
Ddias
Ddias
Ddias
Ddit3
Ddit3
Ddx3x
Ddx4
Ddx4
Ddx4
Ddx4
Ddx11
Ddx11
Ddx11
Ddx39b
Deup1
Dgkz
Dgkz
Dicer1
Dicer1
Dicer1
Dis3l2
Dis3l2
Dis3l2
Dlg1
Dlg1
Dlgap5
Dlgap5
Dlgap5
Dmc1
Dmc1
Dmc1
Dmc1
Dmc1
Dmc1
Dmc1
Dmrt1
Dmrt1
Dmrt1
Dmrtc2
Dmtf1
Dna2
Dna2
Dnmt3c
Dnmt3c
Dnmt3l
Donson
Donson
Donson
Dot1l
Drd2
Drd3
Drd3
Drg1
Dscc1
Dscc1
Dscc1
Dscc1
Dsn1
Dsn1
Dstn
Dtl
Dtl
Dtl
Dusp1
Dusp3
Dusp3
Dync1h1
Dync1h1
Dync1h1
Dync1h1
Dync1h1
Dync1h1
Dync1h1
Dync1li1
Dync1li1
Dync1li1
Dynlt1b
Dynlt3
Dynlt3
Dynlt3
Dyrk3
Dyrk3
Dyrk3
E2f1
E2f1
E2f1
E2f1
E2f1
E2f1
E2f2
E2f2
E2f3
E2f3
E2f4
E2f4
E2f4
E2f4
E2f4
E2f5
E2f5
E2f6
E2f6
E2f7
E2f7
E2f7
E2f7
E2f7
E2f8
E2f8
E2f8
E2f8
E4f1
E4f1
E4f1
E4f1
Ecd
Ecrg4
Ecrg4
Ect2
Ect2
Ect2
Ect2
Ect2
Ect2
Edn1
Edn3
Efhc1
Efhc1
Efhc1
Efhc1
Efhc2
Efhc2
Egf
Egfr
Egfr
Egfr
Ehmt2
Eid1
Eif2ak4
Eif2ak4
Eif2ak4
Eif4e
Eif4e
Eif4ebp1
Eif4ebp1
Eif4g1
Eif4g3
Eme1
Eme1
Eme2
Eme2
Eml1
Eml3
Eml3
Eml3
Eml4
Eml4
Eml4
Ensa
Entr1
Entr1
Entr1
Ep300
Epb41
Epb41l2
Epgn
Epgn
Epgn
Epm2a
Eps8
Ercc1
Ercc2
Ercc3
Ercc4
Ercc6
Ercc6l
Ereg
Ereg
Ereg
Ereg
Ereg
Ern1
Ern2
Esco1
Esco1
Esco2
Esco2
Espl1
Espl1
Espl1
Espl1
Espl1
Espl1
Espl1
Esr1
Esrrb
Esrrb
Etaa1
Etaa1
Ets1
Evi2b
Evi5
Exd1
Exo1
Eya1
Eya1
Ezh2
Ezh2
Ezh2
Ezr
Fam32a
Fam83d
Fam83d
Fam83d
Fam83d
Fam107a
Fam107a
Fam122a
Fanca
Fancd2
Fancd2
Fancd2
Fancd2
Fancd2
Fanci
Fancm
Fap
Fbxl3
Fbxl3
Fbxl6
Fbxl6
Fbxl7
Fbxl7
Fbxl7
Fbxl8
Fbxl8
Fbxl12
Fbxl12
Fbxl15
Fbxl17
Fbxl17
Fbxl21
Fbxl21
Fbxl22
Fbxl22
Fbxo4
Fbxo5
Fbxo5
Fbxo5
Fbxo5
Fbxo5
Fbxo5
Fbxo5
Fbxo5
Fbxo5
Fbxo5
Fbxo5
Fbxo5
Fbxo7
Fbxo7
Fbxo31
Fbxo31
Fbxo43
Fbxo43
Fbxo43
Fbxo43
Fbxo43
Fbxo43
Fbxw5
Fbxw5
Fbxw7
Fbxw11
Fbxw11
Fem1b
Fen1
Fes
Fgf2
Fgf8
Fgf10
Fgf10
Fgf10
Fgf10
Fgfr1
Fgfr1
Fgfr2
Fgfr2
Fgfr3
Fhl1
Fhl1
Fign
Fignl1
Fignl1
Fkbp6
Flcn
Flna
Flt3l
Fmn2
Fmn2
Fmn2
Fmn2
Fnta
Fntb
Fosl1
Foxa1
Foxa1
Foxa1
Foxc1
Foxe3
Foxg1
Foxg1
Foxg1
Foxj2
Foxj3
Foxk1
Foxm1
Foxm1
Foxm1
Foxm1
Foxn3
Foxo4
Foxo4
Foxo4
Foxo4
Fsd1
Fsd1
Fsd1
Fzd3
Fzd9
Fzr1
Fzr1
Fzr1
Gadd45a
Gadd45a
Gadd45a
Gadd45a
Gadd45a
Gadd45b
Gadd45b
Gadd45g
Gadd45g
Gadd45gip1
Gadd45gip1
Gadd45gip1
Gak
Gas1
Gas1
Gas1
Gas1
Gas1
Gas2
Gas2
Gas2l1
Gas2l1
Gas2l1
Gata3
Gata3
Gata4
Gata6
Gbf1
Gdpd5
Gem
Gem
Gen1
Gen1
Gigyf2
Gins1
Gins3
Gipc1
Git1
Gja1
Gjc2
Gli1
Gm773
Gm960
Gm960
Gm960
Gm960
Gm960
Gm1140
Gm1993
Gm2012
Gm2030
Gm4297
Gm5168
Gm5169
Gm5934
Gm5935
Gm6121
Gm10230
Gm10332
Gm10488
Gm14525
Gm16430
Gm20736
Gm20817
Gm20820
Gm20824
Gm20843
Gm20890
Gm20911
Gm21095
Gm21117
Gm21294
Gm21627
Gm21760
Gm21858
Gm21865
Gm21996
Gm28102
Gm28490
Gm28510
Gm28576
Gm28870
Gm28919
Gm28961
Gm29276
Gm29554
Gm29866
Gm49340
Gm49361
Gm49601
Gmnc
Gmnc
Gmnn
Gmnn
Gmnn
Gnai1
Gnai1
Gnai2
Gnai3
Golga2
Golga2
Golga2
Golga2
Golga2
Golga2
Golga2
Gper1
Gper1
Gper1
Gpnmb
Gpr3
Gpr132
Gpr132
Gpr132
Gpr132
Gpsm2
Gpsm2
Gpsm2
Gpsm2
Gpsm2
Gpsm2
Grb14
Grk5
Gsk3b
Gspt2
Gtpbp4
H1f8
H2-M3
H2ax
H2ax
H2ax
Hacd1
Hacd1
Hace1
Haspin
Haspin
Haspin
Haspin
Haus1
Haus1
Haus1
Haus1
Haus1
Haus2
Haus2
Haus2
Haus3
Haus3
Haus3
Haus3
Haus3
Haus4
Haus4
Haus4
Haus4
Haus4
Haus5
Haus5
Haus5
Haus5
Haus5
Haus6
Haus6
Haus7
Haus7
Haus7
Haus7
Haus7
Haus8
Haus8
Haus8
Haus8
Haus8
Hcfc1
Hdac3
Hdac3
Hdac8
Hdac8
Heca
Hecw2
Hells
Hepacam
Hepacam
Hepacam2
Hepacam2
Hepacam2
Hes1
Hexim1
Hexim1
Hexim2
Hexim2
Hfm1
Hfm1
Hfm1
Hhex
Hinfp
Hinfp
Hinfp
Hjurp
Hmcn1
Hmg20b
Hmga2
Hmga2
Hmga2
Hmgb1
Hnf4a
Hnrnpu
Hnrnpu
Hnrnpu
Hnrnpu
Hnrnpu
Hnrnpu
Hormad1
Hormad1
Hormad1
Hormad1
Hormad1
Hormad1
Hormad1
Hormad1
Hormad2
Hormad2
Hoxa13
Hpgd
Hras
Hsf1
Hsf1
Hsf1
Hsf2bp
Hsf2bp
Hsp90ab1
Hsp90ab1
Hsp90ab1
Hspa1a
Hspa1b
Hspa2
Hspa2
Hspa2
Hspa8
Htt
Hus1
Hus1
Hus1
Hus1
Hus1
Hus1b
Hus1b
Hus1b
Hus1b
Hyal1
Id2
Id2
Id2
Id3
Id4
Ier3
Iffo1
Ifng
Ifnz
Igf1
Igf1r
Igf1r
Igf1r
Igf2
Iho1
Iho1
Iho1
Iho1
Iho1
Iho1
Ik
Ik
Ikzf1
Il1a
Il1b
Il10
Il12a
Il12b
Ilk
Ilkap
Inca1
Inca1
Inca1
Inca1
Incenp
Incenp
Incenp
Incenp
Incenp
Incenp
Incenp
Incenp
Ing1
Ing2
Ing4
Ing4
Inha
Inhba
Inhba
Inhba
Ino80
Ino80
Ino80
Ino80
Ino80
Ins2
Insc
Insc
Insm1
Insm1
Insm1
Insm2
Insr
Insr
Insr
Ints3
Ints7
Ints13
Ints13
Ints13
Ints13
Iqgap1
Iqgap3
Irf1
Irf6
Ist1
Ist1
Itgb1
Itgb1
Itgb1
Itgb3bp
Jade1
Jmy
Jmy
Jtb
Jtb
Jtb
Jtb
Jun
Jun
Junb
Junb
Jund
Kank2
Kank2
Kash5
Kash5
Kash5
Kash5
Kash5
Kash5
Kash5
Kash5
Kash5
Kash5
Kash5
Kat2a
Kat2b
Kat2b
Kat2b
Kat14
Katna1
Katnb1
Kcna5
Kcnh5
Kctd11
Kdm8
Kdm8
Khdc3
Khdc3
Khdc3
Khdrbs1
Kif2a
Kif2a
Kif2a
Kif2b
Kif2b
Kif2c
Kif2c
Kif2c
Kif2c
Kif3a
Kif3b
Kif3b
Kif4
Kif4
Kif4
Kif11
Kif11
Kif11
Kif11
Kif11
Kif11
Kif11
Kif13a
Kif13a
Kif14
Kif14
Kif14
Kif14
Kif18a
Kif18a
Kif18a
Kif18a
Kif18b
Kif18b
Kif18b
Kif20a
Kif20a
Kif20a
Kif20b
Kif20b
Kif20b
Kif20b
Kif22
Kif22
Kif22
Kif23
Kif23
Kif23
Kif23
Kif23
Kifc1
Kifc1
Kifc2
Kifc5b
Kiz
Kiz
Klf4
Klf11
Klhdc3
Klhdc8b
Klhdc8b
Klhdc8b
Klhdc8b
Klhl9
Klhl9
Klhl13
Klhl13
Klhl18
Klhl18
Klhl21
Klhl21
Klhl22
Klhl22
Klhl22
Klhl22
Klhl42
Kmt2e
Kmt2e
Kmt2e
Kmt5a
Knl1
Knl1
Knl1
Knstrn
Knstrn
Knstrn
Knstrn
Knstrn
Knstrn
Knstrn
Kntc1
Kntc1
Kpnb1
Kpnb1
Kpnb1
Kpnb1
Kpnb1
Krtap21-1
L3mbtl1
Larp7
Lats1
Lats1
Lats1
Lats1
Lats1
Lats1
[truncated: 2,088 more rows]

## Sheet: ER.Membrane
Symbol
Abcb9
Abcb9
Acer3
Acer3
Amfr
Ankle2
Arl6ip1
Asph
Atf6
Atf6b
Aup1
Aup1
B2m
Bscl2
Bscl2
Calr
Calr
Caml
Ccdc47
Cln3
Cpt1c
Cpt1c
Cpt1c
Creb3
Creb3l1
Cyp2e1
Dcstamp
Derl1
Derl1
Derl2
Derl2
Derl3
Derl3
Dgat2
Dhcr7
Dhrs9
Dnajb2
Dnajb2
Dnajb12
Dolk
Dolk
Dolpp1
Dolpp1
Dpm2
Dpm3
Dpm3
Edem1
Elovl1
Elovl2
Elovl3
Elovl4
Elovl4
Elovl5
Elovl6
Elovl6
Elovl7
Emc1
Emc1
Emc1
Emc2
Emc2
Emc3
Emc3
Emc3
Emc4
Emc4
Emc4
Emc6
Emc6
Emc6
Emc7
Emc7
Emc7
Emc8
Emc8
Emc9
Emc9
Emc10
Emc10
Emc10
Ergic1
Ergic3
Ern1
Ero1a
Esyt1
Esyt1
Esyt2
Esyt2
Esyt3
Esyt3
Ext1
Ficd
Fitm1
Fitm1
Fitm2
Fitm2
Fkbp8
Gpaa1
Gpaa1
Gpat4
Gramd1a
Gramd2
Gramd2
H2-D1
H2-K1
H2-Q1
H2-Q2
H2-Q4
H2-Q6
H2-Q7
H2-Q10
H13
H13
H13
H13
Hacd1
Hacd2
Hacd3
Hacd4
Hsd11b1
Hspa5
Insig1
Insig1
Insig2
Insig2
Itpr1
Itpr3
Ktn1
Lnpk
Lrit1
Lrit1
Lrmp
Lrrc8e
Marchf6
Marchf6
Mboat4
Mboat4
Mmgt1
Mmgt1
Mmgt1
Mmgt2
Nfe2l1
Nfe2l1
Pdia3
Pdia3
Pdia3
Pgap3
Pgap3
Pigg
Pigk
Pigk
Pigs
Pigs
Pigt
Pigt
Pigt
Pigu
Pigu
Pkd2
Pkd2
Porcn
Preb
Preb
Rce1
Retreg1
Retreg1
Rhbdd1
Rnf180
Rnf180
Rnf183
Rrbp1
Rtn4
Rtn4
Rtn4
Sacm1l
Samd8
Samd8
Saraf
Scd1
Scd1
Scd2
Scd3
Scd4
Sec62
Selenos
Selenos
Sgms1
Sgms2
Slc27a2
Slc27a2
Slc27a5
Slc27a5
Slc35b1
Slc35b2
Slc35b3
Slc35b4
Slc37a1
Slc37a1
Slc37a2
Slc37a2
Slc37a3
Slc37a3
Slc37a4
Spcs1
Spcs1
Spcs1
Sppl2a
Sppl2a
Sppl2a
Sppl2a
Sppl2b
Sppl2b
Sppl2b
Sppl2b
Sppl2c
Sppl2c
Sppl2c
Sppl2c
Sppl3
Sppl3
Sppl3
Sppl3
Srebf2
Stim1
Sting1
Tap1
Tap1
Tap1
Tap1
Tap1
Tap1
Tap2
Tap2
Tap2
Tap2
Tap2
Tap2
Tapbp
Tapbp
Tapt1
Tecr
Tex261
Tm7sf2
Tmco1
Tmem33
Tram1
Tram1
Tram1
Tram1l1
Tram2
Ubxn8
Wdr83os
Wfs1
Wfs1
Xbp1
Xxylt1
Zfyve27
Zmpste24

## Sheet: rRNAProcessing
Symbol
Abt1
Abt1
Abt1
Bms1
Bms1
Bmt2
Bop1
Bop1
Bop1
Bop1
Bop1
Bud23
Bud23
Bud23
Bud23
Bysl
Bysl
C1d
C1d
C1d
Cdkn2a
Chd7
Dcaf13
Dcaf13
Ddx10
Ddx17
Ddx18
Ddx21
Ddx27
Ddx47
Ddx47
Ddx49
Ddx51
Ddx52
Ddx54
Ddx56
Dhx37
Dimt1
Dimt1
Dimt1
Dimt1
Dimt1
Dimt1
Dis3
Dkc1
Dkc1
Dkc1
Dkc1
Dkc1
Dkc1
Ebna1bp2
Eif6
Eif6
Emg1
Emg1
Ercc2
Eri1
Eri1
Eri1
Eri2
Eri3
Esf1
Exosc1
Exosc2
Exosc2
Exosc3
Exosc3
Exosc4
Exosc4
Exosc5
Exosc6
Exosc7
Exosc7
Exosc8
Exosc8
Exosc9
Exosc9
Exosc10
Exosc10
Exosc10
Fam207a
Fbl
Fbl
Fbl
Fbl
Fbll1
Fbll1
Fbll1
Fcf1
Fcf1
Fcf1
Fdxacb1
Frg1
Ftsj3
Ftsj3
Ftsj3
Ftsj3
Ftsj3
Gar1
Gar1
Gm14214
Gtf2h5
Gtpbp4
Heatr1
Heatr1
Helb
Helq
Imp3
Imp3
Imp4
Isg20
Kat2b
Kri1
Krr1
Las1l
Las1l
Las1l
Las1l
Lsm6
Lsm6
Lyar
Lyar
Mak16
Mak16
Mdn1
Mettl5
Mettl15
Mettl16
Mphosph6
Mphosph6
Mphosph6
Mphosph10
Mphosph10
Mrm1
Mrm2
Mrm2
Mrm3
Mrm3
Mrpl1
Mrps11
Mrto4
Mterf4
Mtrex
Mtrex
Mtrex
Naf1
Naf1
Nat10
Nat10
Ncl
Ngdn
Nhp2
Nhp2
Nhp2
Nhp2
Nifk
Nob1
Nob1
Nob1
Nol6
Nol8
Nol9
Nol9
Nol9
Nol10
Nol11
Nol11
Nol11
Nop2
Nop2
Nop2
Nop9
Nop9
Nop9
Nop10
Nop10
Nop10
Nop14
Nop14
Nop53
Npm1
Npm3
Nsa2
Nsa2
Nsa2
Nsun3
Nsun4
Nsun4
Nsun4
Nsun5
Nsun5
Nsun5
Nsun5
Nvl
Pa2g4
Pdcd11
Pes1
Pes1
Pes1
Pes1
Pes1
Pes1
Pes1
Pih1d1
Pih1d2
Pin4
Pop4
Pop5
Pop5
Pop7
Prkdc
Pwp2
Rbfa
Rbfa
Rcl1
Rcl1
Rcl1
Rcl1
Rexo4
Riok1
Riok1
Riok1
Riok2
Riok2
Riok2
Riok3
Riok3
Rnasel
Rpf1
Rpf1
Rpf1
Rpf2
Rpf2
Rpl5
Rpl7
Rpl7
Rpl7a
Rpl7l1
Rpl10a
Rpl11
Rpl14
Rpl26
Rpl27
Rpl35
Rpl35a
Rpp25
Rpp30
Rpp38
Rpp40
Rpp40
Rps6
Rps6
Rps7
Rps7
Rps8
Rps14
Rps15
Rps16
Rps16
Rps17
Rps19
Rps19
Rps19
Rps21
Rps21
Rps24
Rps25
Rps28
Rps28
Rpusd1
Rpusd2
Rpusd3
Rpusd4
Rrp1
Rrp1b
Rrp7a
Rrp8
Rrp9
Rrp12
Rrp15
Rrp15
Rrp15
Rrp36
Rrp36
Rrp36
Rrs1
Rsl1d1
Sart1
Sbds
Shq1
Sirt7
Snu13
Snu13
Srfbp1
Suv39h1
Tbl3
Tbl3
Tbl3
Tent4b
Tfb1m
Tfb1m
Tfb1m
Tfb1m
Tfb2m
Tfb2m
Tfb2m
Trmt112
Trmt112
Trmt112
Trmt112
Tsr1
Tsr1
Tsr2
Tsr2
Tsr3
Tsr3
Tsr3
Tsr3
Urb1
Urb1
Usp36
Usp36
Utp3
Utp4
Utp4
Utp4
Utp6
Utp6
Utp11
Utp11
Utp14a
Utp14b
Utp15
Utp15
Utp18
Utp20
Utp23
Utp23
Utp25
Wbp11
Wdr3
Wdr12
Wdr12
Wdr12
Wdr12
Wdr12
Wdr18
Wdr36
Wdr43
Wdr43
Wdr46
Wdr55
Wdr55
Wdr74
Wdr75
Wdr75
Ybey
Ythdf2
Zcchc4
Zcchc4
Znhit3
Znhit6

[truncated: 2 more sheets: Small_Mol_Metabolism, ExtracellMatrixStructural]
