# Supplementary material for: Extensive protein dosage compensation in aneuploid human cancers
Source: HighWire-hosted journal article supplement (doi:10.1101/gr.276378.121), 2022-06-14
Supplement: Supplemental_Table_S7.xlsx [file Supplemental_Table_S7.xlsx]

## Sheet: Legend Table S7
Supplemental Table 7. Terms enriched per protein difference category (Scaling, buffered, or anti-scaling) upon chromosome gain or loss in the merged-control dataset
1) Info- Information about collumn names and meaning for Supplemental Table 7
2) Protein.MergedControl.Gain- Proteins in merged-control dataset found to scale with chromosome gain (difference > -0.1 < 0.25)
3) Protein.MergedControl.Loss- Proteins in merged-control dataset found to scale with chromosome loss (difference > -0.25 < 0.1)

## Sheet: Info
Supplementary Table 7
Terms enriched per protein difference category (Scaling, buffered, or anti-scaling) upon chromosome gain or loss in the merged-control dataset
	dataset contains protein expression differences between aneuploid and euploid chromosomes, with no mutations, no flipped genes, no low RNA expression genes and no low reproducibility genes
Each sheet contains Gene Set Ontology Terms for a specific set of proteins
Sheet name	Protein group
Protein.MergedControl.Gain	Proteins in merged-control dataset found to scale with chromosome gain (difference > -0.1 < 0.25)
Protein.MergedControl.Loss	Proteins in merged-control dataset found to scale with chromosome loss (difference > -0.25 < 0.1)
Where "difference" is the log2 fold change of RNA expression levels (see methods).
Collumn	Definition
significant	Indicator for statistically significant results.
p_value	Hypergeometric p-value after correction for multiple testing.
negative_log2_p_value	Negative log2 of the p-value
term_size	The number of genes that are annotated to the term.
query_size	The number of genes that were included in the query, (in the difference category upon aneuploidy, e.g. all RNA buffered upon loss).
intersection_size	The number of genes in the query that are annotated to the corresponding term.
precision	The proportion of genes in the input list that are annotated to the function.
recall	The proportion of functionally annotated genes that the query recovers.
term_id	Term ID
source	The abbreviation of the datasource for the term (see below).
term_name	Name of term
effective_domain_size	The total number of genes "in the universe " which is used as one of the four parameters for the hypergeometric probability function of statistical significance.
source_order	The numeric order for the term within its datasource. Important for drawing reproducible manhattan plots across different platforms.
source ID	Source name
GO:MF	molecular function
GO:CC	cellular component
GO:BP	biological process
KEGG	Kyoto Encyclopedia of Genes and Genomes
REAC	Reactome
WP	WikiPathways
TF	Transfac
MIRNA	miRTarBase
HPA	Human Protein Atlas
CORUM	CORUM protein complexes
HP	Human Phenotype Ontology

## Sheet: Protein.MergedControl.Gain
significant	p_value	term_size	query_size	intersection_size	precision	recall	term_id	source	term_name	effective_domain_size	source_order
TRUE	3.25726e-12	1331	2243	898	0.400357	0.674681	CORUM:0000000	CORUM	CORUM root	3766	1
TRUE	2.78043e-09	94	2243	84	0.0374498	0.893617	CORUM:351	CORUM	Spliceosome	3766	205
TRUE	1.90806e-06	53	2243	49	0.0218457	0.924528	CORUM:1181	CORUM	C complex spliceosome	3766	659
TRUE	2.9924e-06	52	2243	48	0.0213999	0.923077	CORUM:320	CORUM	55S ribosome, mitochondrial	3766	191
TRUE	0.000173006	23	2243	23	0.0102541	1	CORUM:315	CORUM	28S ribosomal subunit, mitochondrial	3766	190
TRUE	0.00110492	25	2243	24	0.0107	0.96	CORUM:2755	CORUM	17S U2 snRNP	3766	1174
TRUE	0.00655121	38	2243	33	0.0147124	0.868421	CORUM:3055	CORUM	Nop56p-associated pre-rRNA complex	3766	1362
TRUE	0.0313009	18	2243	17	0.00757914	0.944444	CORUM:193	CORUM	PA700-20S-PA28 complex	3766	98
TRUE	4.76504e-15	1623	2243	1101	0.49086	0.678373	GO:0034641	GO:BP	cellular nitrogen compound metabolic process	3766	10027
TRUE	1.73852e-12	1374	2243	939	0.418636	0.683406	GO:0006139	GO:BP	nucleobase-containing compound metabolic process	3766	2173
TRUE	2.41127e-12	1162	2243	807	0.359786	0.694492	GO:0090304	GO:BP	nucleic acid metabolic process	3766	21373
TRUE	7.52685e-12	425	2243	329	0.146679	0.774118	GO:0006396	GO:BP	RNA processing	3766	2400
TRUE	3.57845e-11	1433	2243	970	0.432457	0.676902	GO:0046483	GO:BP	heterocycle metabolic process	3766	14204
TRUE	2.17788e-10	367	2243	286	0.127508	0.779292	GO:0016071	GO:BP	mRNA metabolic process	3766	5688
TRUE	8.09217e-10	1040	2243	721	0.321444	0.693269	GO:0016070	GO:BP	RNA metabolic process	3766	5687
TRUE	1.88692e-09	1440	2243	967	0.431119	0.671528	GO:0006725	GO:BP	cellular aromatic compound metabolic process	3766	2705
TRUE	5.54259e-09	1509	2243	1007	0.448952	0.667329	GO:1901360	GO:BP	organic cyclic compound metabolic process	3766	24636
TRUE	8.53479e-09	252	2243	203	0.0905038	0.805556	GO:0006397	GO:BP	mRNA processing	3766	2401
TRUE	4.3394e-08	227	2243	184	0.082033	0.810573	GO:0008380	GO:BP	RNA splicing	3766	3621
TRUE	7.81002e-08	1114	2243	759	0.338386	0.681329	GO:0044271	GO:BP	cellular nitrogen compound biosynthetic process	3766	12747
TRUE	1.33494e-07	1385	2243	925	0.412394	0.66787	GO:0010467	GO:BP	gene expression	3766	4661
TRUE	2.22212e-07	188	2243	155	0.0691039	0.824468	GO:0000375	GO:BP	RNA splicing, via transesterification reactions	3766	154
TRUE	6.29082e-07	185	2243	152	0.0677664	0.821622	GO:0000398	GO:BP	mRNA splicing, via spliceosome	3766	168
TRUE	6.29082e-07	185	2243	152	0.0677664	0.821622	GO:0000377	GO:BP	RNA splicing, via transesterification reactions with bulged adenosine as nucleophile	3766	156
TRUE	1.29707e-06	210	2243	169	0.0753455	0.804762	GO:0022613	GO:BP	ribonucleoprotein complex biogenesis	3766	7628
TRUE	1.47274e-06	1054	2243	716	0.319215	0.679317	GO:0034645	GO:BP	cellular macromolecule biosynthetic process	3766	10031
TRUE	3.88134e-06	1070	2243	724	0.322782	0.676636	GO:0009059	GO:BP	macromolecule biosynthetic process	3766	3675
TRUE	0.000415629	172	2243	137	0.0610789	0.796512	GO:1903311	GO:BP	regulation of mRNA metabolic process	3766	26352
TRUE	0.00050376	1445	2243	943	0.420419	0.652595	GO:1901576	GO:BP	organic substance biosynthetic process	3766	24835
TRUE	0.000523338	1404	2243	918	0.409273	0.653846	GO:0044249	GO:BP	cellular biosynthetic process	3766	12733
TRUE	0.00111074	266	2243	200	0.0891663	0.75188	GO:0006412	GO:BP	translation	3766	2415
TRUE	0.00214715	361	2243	262	0.116808	0.725762	GO:0051276	GO:BP	chromosome organization	3766	15771
TRUE	0.00261747	821	2243	555	0.247436	0.676005	GO:0019219	GO:BP	regulation of nucleobase-containing compound metabolic process	3766	6493
TRUE	0.00352259	142	2243	114	0.0508248	0.802817	GO:0042254	GO:BP	ribosome biogenesis	3766	11668
TRUE	0.00363406	1465	2243	950	0.42354	0.648464	GO:0009058	GO:BP	biosynthetic process	3766	3674
TRUE	0.00479851	844	2243	568	0.253232	0.672986	GO:0034654	GO:BP	nucleobase-containing compound biosynthetic process	3766	10036
TRUE	0.00492144	242	2243	182	0.0811413	0.752066	GO:0010608	GO:BP	posttranscriptional regulation of gene expression	3766	4767
TRUE	0.00527513	117	2243	96	0.0427998	0.820513	GO:0006403	GO:BP	RNA localization	3766	2407
TRUE	0.00646961	274	2243	203	0.0905038	0.740876	GO:0043043	GO:BP	peptide biosynthetic process	3766	12141
TRUE	0.00671445	56	2243	51	0.0227374	0.910714	GO:0070126	GO:BP	mitochondrial translational termination	3766	18706
TRUE	0.00866848	317	2243	231	0.102987	0.728707	GO:0043604	GO:BP	amide biosynthetic process	3766	12473
TRUE	0.00937743	784	2243	529	0.235845	0.674745	GO:0010556	GO:BP	regulation of macromolecule biosynthetic process	3766	4720
TRUE	0.013882	712	2243	483	0.215337	0.678371	GO:0043933	GO:BP	protein-containing complex subunit organization	3766	12553
TRUE	0.014507	776	2243	523	0.23317	0.673969	GO:2000112	GO:BP	regulation of cellular macromolecule biosynthetic process	3766	29314
TRUE	0.0185075	62	2243	55	0.0245207	0.887097	GO:0006415	GO:BP	translational termination	3766	2418
TRUE	0.0236521	879	2243	586	0.261257	0.666667	GO:0018130	GO:BP	heterocycle biosynthetic process	3766	6036
TRUE	0.0269306	57	2243	51	0.0227374	0.894737	GO:0070125	GO:BP	mitochondrial translational elongation	3766	18705
TRUE	0.0278696	112	2243	91	0.0405707	0.8125	GO:0016072	GO:BP	rRNA metabolic process	3766	5689
TRUE	0.0368413	72	2243	62	0.0276416	0.861111	GO:0006414	GO:BP	translational elongation	3766	2417
TRUE	0.0386395	111	2243	90	0.0401248	0.810811	GO:0006364	GO:BP	rRNA processing	3766	2374
TRUE	2.04161e-14	1548	2243	1053	0.469461	0.680233	GO:0032991	GO:CC	protein-containing complex	3766	1570
TRUE	3.37331e-12	412	2243	321	0.143112	0.779126	GO:0140513	GO:CC	nuclear protein-containing complex	3766	3961
TRUE	6.00522e-12	307	2243	248	0.110566	0.807818	GO:1990904	GO:CC	ribonucleoprotein complex	3766	4442
TRUE	3.12823e-10	1314	2243	893	0.398128	0.679604	GO:0031981	GO:CC	nuclear lumen	3766	1452
TRUE	2.20495e-09	1200	2243	819	0.365136	0.6825	GO:0005654	GO:CC	nucleoplasm	3766	312
TRUE	2.96883e-08	1905	2243	1242	0.553723	0.651969	GO:0005634	GO:CC	nucleus	3766	295
TRUE	2.27738e-05	459	2243	333	0.148462	0.72549	GO:1902494	GO:CC	catalytic complex	3766	4001
TRUE	8.9414e-05	99	2243	86	0.0383415	0.868687	GO:0005681	GO:CC	spliceosomal complex	3766	335
TRUE	0.00111074	266	2243	200	0.0891663	0.75188	GO:0016604	GO:CC	nuclear body	3766	899
TRUE	0.00134764	145	2243	117	0.0521623	0.806897	GO:0016607	GO:CC	nuclear speck	3766	902
TRUE	0.00160046	50	2243	47	0.0209541	0.94	GO:0005761	GO:CC	mitochondrial ribosome	3766	406
TRUE	0.00160046	50	2243	47	0.0209541	0.94	GO:0000313	GO:CC	organellar ribosome	3766	63
TRUE	0.00191048	376	2243	272	0.121266	0.723404	GO:0005694	GO:CC	chromosome	3766	348
TRUE	0.00223506	54	2243	50	0.0222916	0.925926	GO:0071013	GO:CC	catalytic step 2 spliceosome	3766	2934
TRUE	0.0025504	49	2243	46	0.0205082	0.938776	GO:0005684	GO:CC	U2-type spliceosomal complex	3766	338
TRUE	0.017529	1845	2243	1174	0.523406	0.636314	GO:0070013	GO:CC	intracellular organelle lumen	3766	2720
TRUE	0.017529	1845	2243	1174	0.523406	0.636314	GO:0031974	GO:CC	membrane-enclosed lumen	3766	1446
TRUE	0.017529	1845	2243	1174	0.523406	0.636314	GO:0043233	GO:CC	organelle lumen	3766	2134
TRUE	0.0336805	138	2243	109	0.0485956	0.789855	GO:0098798	GO:CC	mitochondrial protein-containing complex	3766	3629
TRUE	0.043692	114	2243	92	0.0410165	0.807018	GO:0098687	GO:CC	chromosomal region	3766	3612
TRUE	6.45577e-13	1025	2243	723	0.322336	0.705366	GO:0003676	GO:MF	nucleic acid binding	3766	399
TRUE	9.56976e-12	768	2243	555	0.247436	0.722656	GO:0003723	GO:MF	RNA binding	3766	438
TRUE	2.40526e-06	1624	2243	1064	0.474365	0.655172	GO:1901363	GO:MF	heterocyclic compound binding	3766	11949
TRUE	4.59688e-06	1643	2243	1074	0.478823	0.653682	GO:0097159	GO:MF	organic cyclic compound binding	3766	10305
TRUE	4.12296e-06	1410	2243	933	0.415961	0.661702	HPA:0090162	HPA	cerebellum; Purkinje cells[‚â•Medium]	3766	96
TRUE	6.49573e-06	1017	2243	690	0.307624	0.678466	HPA:0090192	HPA	cerebellum; cells in molecular layer[‚â•Medium]	3766	114
TRUE	0.000112798	582	2243	410	0.182791	0.704467	HPA:0090163	HPA	cerebellum; Purkinje cells[High]	3766	97
TRUE	0.000146659	1877	2243	1206	0.537673	0.642515	HPA:0090161	HPA	cerebellum; Purkinje cells[‚â•Low]	3766	95
TRUE	0.000151486	680	2243	472	0.210432	0.694118	HPA:0190223	HPA	esophagus; squamous epithelial cells[High]	3766	239
TRUE	0.000259849	1500	2243	978	0.436023	0.652	HPA:0460662	HPA	skin 1; keratinocytes[‚â•Medium]	3766	505
TRUE	0.000266454	1477	2243	964	0.429782	0.652674	HPA:0620222	HPA	vagina; squamous epithelial cells[‚â•Medium]	3766	629
TRUE	0.000311026	1845	2243	1185	0.52831	0.642276	HPA:0190222	HPA	esophagus; squamous epithelial cells[‚â•Medium]	3766	238
TRUE	0.000329482	1587	2243	1030	0.459206	0.649023	HPA:0600432	HPA	tonsil; germinal center cells[‚â•Medium]	3766	615
TRUE	0.000371868	565	2243	397	0.176995	0.702655	HPA:0470683	HPA	skin 2; epidermal cells[High]	3766	513
TRUE	0.000441166	1922	2243	1230	0.548373	0.639958	HPA:0050052	HPA	breast; glandular cells[‚â•Medium]	3766	38
TRUE	0.000515317	1569	2243	1018	0.453856	0.648821	HPA:0090191	HPA	cerebellum; cells in molecular layer[‚â•Low]	3766	113
TRUE	0.000823974	1789	2243	1149	0.51226	0.642258	HPA:0470682	HPA	skin 2; epidermal cells[‚â•Medium]	3766	512
TRUE	0.00105715	1735	2243	1116	0.497548	0.643228	HPA:0100132	HPA	cerebral cortex; neuronal cells[‚â•Medium]	3766	169
TRUE	0.00173156	794	2243	539	0.240303	0.678841	HPA:0060103	HPA	bronchus; respiratory epithelial cells[High]	3766	64
TRUE	0.0022283	682	2243	468	0.208649	0.686217	HPA:0100133	HPA	cerebral cortex; neuronal cells[High]	3766	170
TRUE	0.00306032	2201	2243	1390	0.619706	0.631531	HPA:0600431	HPA	tonsil; germinal center cells[‚â•Low]	3766	614
TRUE	0.00409732	472	2243	333	0.148462	0.705508	HPA:0570782	HPA	testis; preleptotene spermatocytes[‚â•Medium]	3766	591
TRUE	0.00460964	1060	2243	702	0.312974	0.662264	HPA:0050011	HPA	breast; adipocytes[‚â•Low]	3766	34
TRUE	0.00631231	2457	2243	1538	0.685689	0.625967	HPA:0050051	HPA	breast; glandular cells[‚â•Low]	3766	37
TRUE	0.00645455	1615	2243	1039	0.463219	0.643344	HPA:0330222	HPA	oral mucosa; squamous epithelial cells[‚â•Medium]	3766	393
TRUE	0.0123406	1314	2243	855	0.381186	0.650685	HPA:0310432	HPA	lymph node; germinal center cells[‚â•Medium]	3766	364
TRUE	0.0124788	577	2243	398	0.177441	0.689775	HPA:0570781	HPA	testis; preleptotene spermatocytes[‚â•Low]	3766	590
TRUE	0.0136245	1433	2243	927	0.413286	0.646895	HPA:0460672	HPA	skin 1; melanocytes[‚â•Medium]	3766	508
TRUE	0.0139436	341	2243	246	0.109675	0.721408	HPA:0460663	HPA	skin 1; keratinocytes[High]	3766	506
TRUE	0.0177725	337	2243	243	0.108337	0.721068	HPA:0090193	HPA	cerebellum; cells in molecular layer[High]	3766	115
TRUE	0.0192547	2186	2243	1376	0.613464	0.62946	HPA:0600441	HPA	tonsil; non-germinal center cells[‚â•Low]	3766	617
TRUE	0.0229585	1353	2243	877	0.390994	0.648189	HPA:0110222	HPA	cervix, uterine; squamous epithelial cells[‚â•Medium]	3766	185
TRUE	0.0497448	1416	2243	913	0.407044	0.644774	HPA:0080132	HPA	caudate; neuronal cells[‚â•Medium]	3766	74
TRUE	0.0497709	448	2243	313	0.139545	0.698661	HPA:0620223	HPA	vagina; squamous epithelial cells[High]	3766	630
TRUE	2.85197e-07	83	2243	77	0.034329	0.927711	KEGG:03040	KEGG	Spliceosome	3766	213
TRUE	2.21174e-15	295	2243	246	0.109675	0.833898	REAC:R-HSA-8953854	REAC	Metabolism of RNA	3766	1295
TRUE	1.27281e-12	133	2243	122	0.0543914	0.917293	REAC:R-HSA-72203	REAC	Processing of Capped Intron-Containing Pre-mRNA	3766	1647
TRUE	1.73726e-09	108	2243	99	0.0441373	0.916667	REAC:R-HSA-72172	REAC	mRNA Splicing	3766	2471
TRUE	1.73726e-09	108	2243	99	0.0441373	0.916667	REAC:R-HSA-72163	REAC	mRNA Splicing - Major Pathway	3766	2472
TRUE	0.000901689	56	2243	52	0.0231832	0.928571	REAC:R-HSA-5368286	REAC	Mitochondrial translation initiation	3766	1348
TRUE	0.00363335	125	2243	102	0.0454748	0.816	REAC:R-HSA-72766	REAC	Translation	3766	2343
TRUE	0.00671445	56	2243	51	0.0227374	0.910714	REAC:R-HSA-5419276	REAC	Mitochondrial translation termination	3766	1349
TRUE	0.0269306	57	2243	51	0.0227374	0.894737	REAC:R-HSA-5389840	REAC	Mitochondrial translation elongation	3766	1347
TRUE	0.0278938	61	2243	54	0.0240749	0.885246	REAC:R-HSA-5368287	REAC	Mitochondrial translation	3766	1346
TRUE	0.000706401	1374	2243	899	0.400802	0.654294	TF:M12273	TF	Factor: YY1; motif: GGCSGCCATTTTGN	3766	8628
TRUE	0.00121198	2014	2243	1282	0.571556	0.636544	TF:M08913	TF	Factor: FLI-1; motif: NAYTTCCGGT	3766	2342
TRUE	0.0012394	1591	2243	1029	0.458761	0.646763	TF:M08982	TF	Factor: YY1; motif: NAANATGGCGNNN	3766	8622
TRUE	0.00331323	1425	2243	926	0.41284	0.649825	TF:M02044	TF	Factor: YY1; motif: GCCGCCATTTTG	3766	8612
TRUE	0.00472231	1884	2243	1201	0.535444	0.637473	TF:M04714	TF	Factor: Elf-1; motif: ACTTCCGGG	3766	1612
TRUE	0.0114871	1150	2243	755	0.336603	0.656522	TF:M00793	TF	Factor: YY1; motif: GCCATNTTN	3766	8636
TRUE	0.0125302	2084	2243	1317	0.58716	0.631958	TF:M11404	TF	Factor: Fli-1; motif: NACCGGAARTN	3766	2358
TRUE	0.0152257	2009	2243	1272	0.567098	0.633151	TF:M09905	TF	Factor: SAP-1; motif: NNCCGGAAGTGN	3766	1790
TRUE	0.0158249	1873	2243	1191	0.530985	0.635878	TF:M11447	TF	Factor: Elf-1; motif: NAMCCGGAAGTN	3766	1626
TRUE	0.019963	2312	2243	1450	0.646456	0.627163	TF:M03975	TF	Factor: ERG; motif: ACCGGAARTN	3766	1930
TRUE	0.02039	1336	2243	867	0.386536	0.648952	TF:M10104	TF	Factor: YY1; motif: CAARATGGCGGC	3766	8624
TRUE	0.0233621	1671	2243	1069	0.476594	0.639737	TF:M03982	TF	Factor: ETV4; motif: ACCGGAAGTN	3766	2174
TRUE	0.0250466	1698	2243	1085	0.483727	0.638987	TF:M02069	TF	Factor: Erm; motif: ACCGGAAGTN	3766	1958
TRUE	0.0267042	1889	2243	1199	0.534552	0.634727	TF:M10436	TF	Factor: YY1; motif: CAANATGGCGGC	3766	8626
TRUE	0.032575	1543	2243	991	0.441819	0.642255	TF:M12275	TF	Factor: YY1; motif: NGCCGCCATYTTGN	3766	8630
TRUE	0.0341026	1317	2243	854	0.38074	0.648443	TF:M01035	TF	Factor: YY1; motif: NYNKCCATNTT	3766	8638
TRUE	0.0341636	1778	2243	1132	0.504681	0.63667	TF:M11425	TF	Factor: PEA3; motif: NACCGGAAGTN	3766	6222
TRUE	0.0417605	562	2243	386	0.172091	0.686833	TF:M10119	TF	Factor: REX-1; motif: GGCMGCCATTTT	3766	6868
TRUE	0.0433981	2224	2243	1396	0.622381	0.627698	TF:M01752	TF	Factor: ERG; motif: ACCGGAART	3766	1926
TRUE	0.0480376	2008	2243	1268	0.565314	0.631474	TF:M03988	TF	Factor: FLI1; motif: ACCGGAARTN	3766	2336

## Sheet: Protein.MergedControl.Loss
significant	p_value	term_size	query_size	intersection_size	precision	recall	term_id	source	term_name	effective_domain_size	source_order
TRUE	1.58096e-21	1331	2557	1036	0.405162	0.778362	CORUM:0000000	CORUM	CORUM root	3766	1
TRUE	4.26997e-10	94	2557	90	0.0351975	0.957447	CORUM:351	CORUM	Spliceosome	3766	205
TRUE	3.79201e-08	52	2557	52	0.0203363	1	CORUM:320	CORUM	55S ribosome, mitochondrial	3766	191
TRUE	0.000314166	29	2557	29	0.0113414	1	CORUM:324	CORUM	39S ribosomal subunit, mitochondrial	3766	193
TRUE	0.00237797	53	2557	48	0.018772	0.90566	CORUM:1181	CORUM	C complex spliceosome	3766	659
TRUE	0.00326942	23	2557	23	0.00899492	1	CORUM:315	CORUM	28S ribosomal subunit, mitochondrial	3766	190
TRUE	0.0193763	25	2557	24	0.009386	0.96	CORUM:2755	CORUM	17S U2 snRNP	3766	1174
TRUE	0.0463051	38	2557	34	0.0132968	0.894737	CORUM:3055	CORUM	Nop56p-associated pre-rRNA complex	3766	1362
TRUE	6.63173e-11	425	2557	357	0.139617	0.84	GO:0006396	GO:BP	RNA processing	3766	2400
TRUE	1.74526e-09	1162	2557	887	0.346891	0.763339	GO:0090304	GO:BP	nucleic acid metabolic process	3766	21373
TRUE	4.49338e-08	185	2557	166	0.0649198	0.897297	GO:0000377	GO:BP	RNA splicing, via transesterification reactions with bulged adenosine as nucleophile	3766	156
TRUE	4.49338e-08	185	2557	166	0.0649198	0.897297	GO:0000398	GO:BP	mRNA splicing, via spliceosome	3766	168
TRUE	5.45236e-08	227	2557	199	0.0778256	0.876652	GO:0008380	GO:BP	RNA splicing	3766	3621
TRUE	7.85196e-08	188	2557	168	0.065702	0.893617	GO:0000375	GO:BP	RNA splicing, via transesterification reactions	3766	154
TRUE	9.51609e-08	252	2557	218	0.0852562	0.865079	GO:0006397	GO:BP	mRNA processing	3766	2401
TRUE	3.05375e-07	1040	2557	792	0.309738	0.761538	GO:0016070	GO:BP	RNA metabolic process	3766	5687
TRUE	1.17595e-06	367	2557	303	0.118498	0.825613	GO:0016071	GO:BP	mRNA metabolic process	3766	5688
TRUE	7.27511e-06	1054	2557	796	0.311302	0.755218	GO:0034645	GO:BP	cellular macromolecule biosynthetic process	3766	10031
TRUE	8.30917e-06	1070	2557	807	0.315604	0.754206	GO:0009059	GO:BP	macromolecule biosynthetic process	3766	3675
TRUE	1.0625e-05	57	2557	57	0.0222917	1	GO:0070125	GO:BP	mitochondrial translational elongation	3766	18705
TRUE	1.28258e-05	1385	2557	1026	0.401251	0.740794	GO:0010467	GO:BP	gene expression	3766	4661
TRUE	1.57612e-05	56	2557	56	0.0219007	1	GO:0070126	GO:BP	mitochondrial translational termination	3766	18706
TRUE	1.70978e-05	210	2557	181	0.0707861	0.861905	GO:0022613	GO:BP	ribonucleoprotein complex biogenesis	3766	7628
TRUE	0.000362269	94	2557	87	0.0340242	0.925532	GO:0140053	GO:BP	mitochondrial gene expression	3766	23006
TRUE	0.000456838	82	2557	77	0.0301134	0.939024	GO:0032543	GO:BP	mitochondrial translation	3766	8860
TRUE	0.000546622	1374	2557	1010	0.394994	0.73508	GO:0006139	GO:BP	nucleobase-containing compound metabolic process	3766	2173
TRUE	0.00134929	1951	2557	1403	0.54869	0.719118	GO:0071840	GO:BP	cellular component organization or biogenesis	3766	19815
TRUE	0.00225855	1623	2557	1178	0.460696	0.725816	GO:0034641	GO:BP	cellular nitrogen compound metabolic process	3766	10027
TRUE	0.00702186	62	2557	59	0.0230739	0.951613	GO:0006415	GO:BP	translational termination	3766	2418
TRUE	0.0124343	72	2557	67	0.0262026	0.930556	GO:0006414	GO:BP	translational elongation	3766	2417
TRUE	0.0352699	1440	2557	1045	0.408682	0.725694	GO:0006725	GO:BP	cellular aromatic compound metabolic process	3766	2705
TRUE	0.0382181	266	2557	215	0.0840829	0.808271	GO:0006412	GO:BP	translation	3766	2415
TRUE	6.27973e-15	1548	2557	1177	0.460305	0.760336	GO:0032991	GO:CC	protein-containing complex	3766	1570
TRUE	1.33993e-11	307	2557	268	0.10481	0.872964	GO:1990904	GO:CC	ribonucleoprotein complex	3766	4442
TRUE	7.79796e-11	412	2557	347	0.135706	0.842233	GO:0140513	GO:CC	nuclear protein-containing complex	3766	3961
TRUE	8.06521e-10	1314	2557	995	0.389128	0.75723	GO:0031981	GO:CC	nuclear lumen	3766	1452
TRUE	3.74048e-08	3084	2557	2174	0.850215	0.704929	GO:0043231	GO:CC	intracellular membrane-bounded organelle	3766	2132
TRUE	5.97565e-08	1348	2557	1011	0.395385	0.75	GO:0043232	GO:CC	intracellular non-membrane-bounded organelle	3766	2133
TRUE	8.13834e-08	1200	2557	907	0.354713	0.755833	GO:0005654	GO:CC	nucleoplasm	3766	312
TRUE	8.88005e-08	3264	2557	2286	0.894016	0.700368	GO:0043229	GO:CC	intracellular organelle	3766	2130
TRUE	1.24857e-07	1350	2557	1011	0.395385	0.748889	GO:0043228	GO:CC	non-membrane-bounded organelle	3766	2129
TRUE	5.10656e-07	1845	2557	1349	0.527571	0.731165	GO:0043233	GO:CC	organelle lumen	3766	2134
TRUE	5.10656e-07	1845	2557	1349	0.527571	0.731165	GO:0070013	GO:CC	intracellular organelle lumen	3766	2720
TRUE	5.10656e-07	1845	2557	1349	0.527571	0.731165	GO:0031974	GO:CC	membrane-enclosed lumen	3766	1446
TRUE	0.000139295	138	2557	123	0.0481032	0.891304	GO:0098798	GO:CC	mitochondrial protein-containing complex	3766	3629
TRUE	0.00016748	50	2557	50	0.0195542	1	GO:0000313	GO:CC	organellar ribosome	3766	63
TRUE	0.00016748	50	2557	50	0.0195542	1	GO:0005761	GO:CC	mitochondrial ribosome	3766	406
TRUE	0.000269836	266	2557	221	0.0864294	0.830827	GO:0016604	GO:CC	nuclear body	3766	899
TRUE	0.000277255	376	2557	303	0.118498	0.805851	GO:0005694	GO:CC	chromosome	3766	348
TRUE	0.00101682	145	2557	127	0.0496676	0.875862	GO:0016607	GO:CC	nuclear speck	3766	902
TRUE	0.00111268	85	2557	79	0.0308956	0.929412	GO:0005840	GO:CC	ribosome	3766	480
TRUE	0.00117887	3291	2557	2288	0.894799	0.695229	GO:0043227	GO:CC	membrane-bounded organelle	3766	2128
TRUE	0.00174425	66	2557	63	0.0246382	0.954545	GO:0044391	GO:CC	ribosomal subunit	3766	2334
TRUE	0.00209538	99	2557	90	0.0351975	0.909091	GO:0005681	GO:CC	spliceosomal complex	3766	335
TRUE	0.00373345	1037	2557	771	0.301525	0.743491	GO:0031090	GO:CC	organelle membrane	3766	1217
TRUE	0.00542693	3416	2557	2364	0.924521	0.692037	GO:0043226	GO:CC	organelle	3766	2127
TRUE	0.0331197	324	2557	258	0.100899	0.796296	GO:0005730	GO:CC	nucleolus	3766	378
TRUE	3.46166e-14	1025	2557	806	0.315213	0.786341	GO:0003676	GO:MF	nucleic acid binding	3766	399
TRUE	3.49343e-09	768	2557	605	0.236605	0.78776	GO:0003723	GO:MF	RNA binding	3766	438
TRUE	0.000112991	51	2557	51	0.0199452	1	GO:0003735	GO:MF	structural constituent of ribosome	3766	449
TRUE	0.000113367	1643	2557	1199	0.468909	0.729763	GO:0097159	GO:MF	organic cyclic compound binding	3766	10305
TRUE	0.000260998	1624	2557	1184	0.463043	0.729064	GO:1901363	GO:MF	heterocyclic compound binding	3766	11949
TRUE	0.00073065	371	2557	298	0.116543	0.803235	GO:0003677	GO:MF	DNA binding	3766	400
TRUE	0.0250911	110	2557	97	0.0379351	0.881818	GO:0140097	GO:MF	catalytic activity, acting on DNA	3766	11780
TRUE	0.03078	85	2557	77	0.0301134	0.905882	GO:0008094	GO:MF	ATPase, acting on DNA	3766	1961
TRUE	3.08476e-05	1735	2557	1265	0.49472	0.729107	HPA:0100132	HPA	cerebral cortex; neuronal cells[‚â•Medium]	3766	169
TRUE	0.000346217	621	2557	481	0.188111	0.774557	HPA:0570762	HPA	testis; pachytene spermatocytes[‚â•Medium]	3766	585
TRUE	0.000552923	586	2557	455	0.177943	0.776451	HPA:0570792	HPA	testis; round or early spermatids[‚â•Medium]	3766	594
TRUE	0.00106263	667	2557	512	0.200235	0.767616	HPA:0570791	HPA	testis; round or early spermatids[‚â•Low]	3766	593
TRUE	0.00470334	744	2557	564	0.220571	0.758065	HPA:0570761	HPA	testis; pachytene spermatocytes[‚â•Low]	3766	584
TRUE	0.00738932	682	2557	519	0.202972	0.760997	HPA:0100133	HPA	cerebral cortex; neuronal cells[High]	3766	170
TRUE	0.00887914	767	2557	579	0.226437	0.754889	HPA:0320103	HPA	nasopharynx; respiratory epithelial cells[High]	3766	390
TRUE	0.0129304	1500	2557	1089	0.42589	0.726	HPA:0460662	HPA	skin 1; keratinocytes[‚â•Medium]	3766	505
TRUE	0.0141537	674	2557	512	0.200235	0.759644	HPA:0360053	HPA	parathyroid gland; glandular cells[High]	3766	412
TRUE	0.0213275	296	2557	238	0.0930778	0.804054	HPA:0460643	HPA	skin 1; Langerhans[High]	3766	500
TRUE	0.0275215	472	2557	366	0.143136	0.775424	HPA:0570782	HPA	testis; preleptotene spermatocytes[‚â•Medium]	3766	591
TRUE	4.12787e-05	83	2557	79	0.0308956	0.951807	KEGG:03040	KEGG	Spliceosome	3766	213
TRUE	0.0408286	36	2557	36	0.014079	1	KEGG:03010	KEGG	Ribosome	3766	206
TRUE	4.01714e-08	133	2557	124	0.0484943	0.932331	REAC:R-HSA-72203	REAC	Processing of Capped Intron-Containing Pre-mRNA	3766	1647
TRUE	5.861e-08	108	2557	103	0.0402816	0.953704	REAC:R-HSA-72163	REAC	mRNA Splicing - Major Pathway	3766	2472
TRUE	5.861e-08	108	2557	103	0.0402816	0.953704	REAC:R-HSA-72172	REAC	mRNA Splicing	3766	2471
TRUE	2.1914e-06	61	2557	61	0.0238561	1	REAC:R-HSA-5368287	REAC	Mitochondrial translation	3766	1346
TRUE	2.27448e-06	295	2557	248	0.0969887	0.840678	REAC:R-HSA-8953854	REAC	Metabolism of RNA	3766	1295
TRUE	1.0625e-05	57	2557	57	0.0222917	1	REAC:R-HSA-5389840	REAC	Mitochondrial translation elongation	3766	1347
TRUE	1.57612e-05	56	2557	56	0.0219007	1	REAC:R-HSA-5419276	REAC	Mitochondrial translation termination	3766	1349
TRUE	1.57612e-05	56	2557	56	0.0219007	1	REAC:R-HSA-5368286	REAC	Mitochondrial translation initiation	3766	1348
TRUE	0.00035775	125	2557	112	0.0438013	0.896	REAC:R-HSA-72766	REAC	Translation	3766	2343
TRUE	0.0458803	1591	2557	1148	0.448964	0.721559	TF:M08982	TF	Factor: YY1; motif: NAANATGGCGNNN	3766	8622
TRUE	0.0471801	1543	2557	1115	0.436058	0.722618	TF:M12275	TF	Factor: YY1; motif: NGCCGCCATYTTGN	3766	8630
TRUE	1.73906e-05	79	2557	76	0.0297223	0.962025	WP:WP411	WP	mRNA Processing	3766	563
