# Supplementary material for: Extensive protein dosage compensation in aneuploid human cancers
Source: HighWire-hosted journal article supplement (doi:10.1101/gr.276378.121), 2022-06-14
Supplement: Supplemental_Table_S8.xlsx [file Supplemental_Table_S8.xlsx]

## Sheet: Legend Table S8
Supplemental Table 8. Terms enriched in proteins buffered in CCLE aneuploidy and yeast aneuploidy
1) Info- Information about collumn names and meaning for Supplemental Table 8
2) Protein.Gain.Yeast.CCLE- Terms enriched in proteins buffered in both CCLE dataset and the yeast aneuploidy dataset upon chromosome gain

## Sheet: Info
Supplementary File 4
Terms enriched in proteins buffered in both CCLE dataset and the yeast aneuploidy dataset upon chromosome gain
Each sheet contains Gene Set Ontology Terms for a specific set of proteins
Sheet name	Protein group
Protein.Gain.Yeast.CCLE	Proteins buffered upon chromosome gain in both aneuploid yeast and human cancer cell lines (CCLE) (buffering: difference > -0.1 < 0.25)
Where "difference" is the log2 fold change of RNA expression levels (see methods).
Collumn	Definition
significant	Indicator for statistically significant results.
p_value	Hypergeometric p-value after correction for multiple testing.
negative_log2_p_value	Negative log2 of the p-value
term_size	The number of genes that are annotated to the term.
query_size	The number of genes that were included in the query, (in the difference category upon aneuploidy, e.g. all RNA buffered upon loss).
intersection_size	The number of genes in the query that are annotated to the corresponding term.
precision	The proportion of genes in the input list that are annotated to the function.
recall	The proportion of functionally annotated genes that the query recovers.
term_id	Term ID
source	The abbreviation of the datasource for the term (see below).
term_name	Name of term
effective_domain_size	The total number of genes "in the universe " which is used as one of the four parameters for the hypergeometric probability function of statistical significance.
source_order	The numeric order for the term within its datasource. Important for drawing reproducible manhattan plots across different platforms.
source ID	Source name
GO:MF	molecular function
GO:CC	cellular component
GO:BP	biological process
KEGG	Kyoto Encyclopedia of Genes and Genomes
REAC	Reactome
WP	WikiPathways
TF	Transfac
MIRNA	miRTarBase
HPA	Human Protein Atlas
CORUM	CORUM protein complexes
HP	Human Phenotype Ontology

## Sheet: Protein.Gain.Yeast.CCLE
significant	p_value	term_size	query_size	intersection_size	precision	recall	term_id	source	term_name	effective_domain_size	source_order
TRUE	1.51482e-07	15	98	14	0.142857	0.933333	REAC:R-HSA-72689	REAC	Formation of a pool of free 40S subunits	738	875
TRUE	8.15461e-07	12	98	12	0.122449	1	GO:0022626	GO:CC	cytosolic ribosome	738	1015
TRUE	8.15461e-07	12	98	12	0.122449	1	KEGG:05171	KEGG	Coronavirus disease - COVID-19	738	430
TRUE	5.459e-06	17	98	14	0.142857	0.823529	REAC:R-HSA-156827	REAC	L13a-mediated translational silencing of Ceruloplasmin expression	738	1186
TRUE	6.02042e-06	423	98	84	0.857143	0.198582	GO:0032991	GO:CC	protein-containing complex	738	1570
TRUE	6.81426e-06	11	98	11	0.112245	1	CORUM:306	CORUM	Ribosome, cytoplasmic	738	183
TRUE	6.81426e-06	11	98	11	0.112245	1	REAC:R-HSA-192823	REAC	Viral mRNA Translation	738	2422
TRUE	6.81426e-06	11	98	11	0.112245	1	REAC:R-HSA-2408557	REAC	Selenocysteine synthesis	738	1988
TRUE	6.81426e-06	11	98	11	0.112245	1	REAC:R-HSA-156902	REAC	Peptide chain elongation	738	1575
TRUE	6.81426e-06	11	98	11	0.112245	1	REAC:R-HSA-156842	REAC	Eukaryotic Translation Elongation	738	797
TRUE	6.81426e-06	11	98	11	0.112245	1	WP:WP477	WP	Cytoplasmic Ribosomal Proteins	738	631
TRUE	2.58616e-05	118	98	39	0.397959	0.330508	GO:1990904	GO:CC	ribonucleoprotein complex	738	4442
TRUE	7.2801e-05	12	98	11	0.112245	0.916667	REAC:R-HSA-2408522	REAC	Selenoamino acid metabolism	738	1987
TRUE	7.41802e-05	19	98	14	0.142857	0.736842	REAC:R-HSA-72706	REAC	GTP hydrolysis and joining of the 60S ribosomal subunit	738	937
TRUE	0.000106477	28	98	17	0.173469	0.607143	GO:0003735	GO:MF	structural constituent of ribosome	738	449
TRUE	0.000110991	25	98	16	0.163265	0.64	GO:0002181	GO:BP	cytoplasmic translation	738	859
TRUE	0.000110991	25	98	16	0.163265	0.64	KEGG:03010	KEGG	Ribosome	738	206
TRUE	0.00022974	29	98	17	0.173469	0.586207	GO:0044391	GO:CC	ribosomal subunit	738	2334
TRUE	0.000421277	13	98	11	0.112245	0.846154	REAC:R-HSA-9633012	REAC	Response of EIF2AK4 (GCN2) to amino acid deficiency	738	1903
TRUE	0.000421277	13	98	11	0.112245	0.846154	REAC:R-HSA-72764	REAC	Eukaryotic Translation Termination	738	799
TRUE	0.000935499	31	98	17	0.173469	0.548387	GO:0005840	GO:CC	ribosome	738	480
TRUE	0.00144414	22	98	14	0.142857	0.636364	REAC:R-HSA-72737	REAC	Cap-dependent Translation Initiation	738	284
TRUE	0.00144414	22	98	14	0.142857	0.636364	REAC:R-HSA-72613	REAC	Eukaryotic Translation Initiation	738	798
TRUE	0.00584223	15	98	11	0.112245	0.733333	REAC:R-HSA-975956	REAC	Nonsense Mediated Decay (NMD) independent of the Exon Junction Complex (EJC)	738	1468
TRUE	0.0097473	55	98	22	0.22449	0.4	REAC:R-HSA-8868773	REAC	rRNA processing in the nucleus and cytosol	738	2499
TRUE	0.0166413	16	98	11	0.112245	0.6875	GO:0006614	GO:BP	SRP-dependent cotranslational protein targeting to membrane	738	2599
TRUE	0.0166413	16	98	11	0.112245	0.6875	REAC:R-HSA-975957	REAC	Nonsense Mediated Decay (NMD) enhanced by the Exon Junction Complex (EJC)	738	1467
TRUE	0.0166413	16	98	11	0.112245	0.6875	REAC:R-HSA-927802	REAC	Nonsense-Mediated Decay (NMD)	738	1469
TRUE	0.0183991	40	98	18	0.183673	0.45	GO:0005198	GO:MF	structural molecule activity	738	1694
TRUE	0.0300858	7	98	7	0.0714286	1	GO:0022625	GO:CC	cytosolic large ribosomal subunit	738	1014
TRUE	0.0301635	58	98	22	0.22449	0.37931	REAC:R-HSA-72312	REAC	rRNA processing	738	2497
TRUE	0.0347823	23	98	13	0.132653	0.565217	REAC:R-HSA-168273	REAC	Influenza Viral RNA Transcription and Replication	738	1082
TRUE	0.0396776	50	98	20	0.204082	0.4	REAC:R-HSA-6791226	REAC	Major pathway of rRNA processing in the nucleolus and cytosol	738	1271
TRUE	0.0419687	17	98	11	0.112245	0.647059	GO:0006613	GO:BP	cotranslational protein targeting to membrane	738	2598
TRUE	0.0457165	38	98	17	0.173469	0.447368	GO:0019080	GO:BP	viral gene expression	738	6459
