# Supplementary material for: Extensive protein dosage compensation in aneuploid human cancers
Source: HighWire-hosted journal article supplement (doi:10.1101/gr.276378.121), 2022-06-14
Supplement: Supplemental_Table_S9.xlsx [file Supplemental_Table_S9.xlsx]

## Sheet: Legend Table S9
Supplemental Table 9. Gene expression correlated with cellular aneuploidy score
1) Info- Information about collumn names and meaning for Supplemental Table 9
2) Protein_Corr_pvalue_GeneAneuploidy- protein expression and cellular aneuploidy pearson correlation scores and significance
3) RNA_Corr_pvalue_GeneAneuploidy- RNA expression and cellular aneuploidy pearson correlation scores and significance

## Sheet: Info
Supplementary Table 9
Gene expression correlated with cellular aneuploidy score
Collumn	Definition
Gene Symbol	Gene Symbol
RNA_ID	Gene Symbol and Entrez Gene ID (format: GENE_ID..ENTREZ_ID.)
Aneuploidy Score (not corrected for ploidy) correlation coefficient	Pearson's correlation coefficient between Protein or RNA expression and cellular aneuploidy score, not corrected for cellular ploidy
Aneuploidy Score correlation coefficient	Pearson's correlation coefficient between Protein or RNA expression and cellular aneuploidy score, not corrected for cellular ploidy
Pvalue	p-value associated with the spearman correlation between gene expression and cellular aneuploidy score
Pvalue Rank	ranking p-values by significance
B.H. Critical Value	Benjamini-Hochberg corrected p-value, to account for multiple testing
Significant	TRUE/FALSE value for whether gene is significantly correlated with cellular aneuploidy score, after correcting for multiple tests

## Sheet: Protein_Corr_pvalue_GeneAneuplo
Gene Symbol	Aneuploidy Score (not corrected for ploidy) correlation coefficient	Aneuploidy Score correlation coefficient	Pvalue	Pvalue Rank	B.H. Critical Value	Significant
HSPA6	0.185432	0.27373	4.01e-11	1	4.06e-06	TRUE
HSPA1A	0.156977	0.223828	1.34e-09	2	8.12e-06	TRUE
SETD1B	0.0522395	0.0698895	5.27e-09	3	1.22e-05	TRUE
RPL22L1	-0.282181	-0.299074	7.88e-09	4	1.62e-05	TRUE
RNF138	-0.169201	-0.192241	1.27e-08	5	2.03e-05	TRUE
ME2	-0.143414	-0.174456	1.36e-07	6	2.44e-05	TRUE
ZFPL1	0.121504	0.12809	2.16e-07	7	2.84e-05	TRUE
LDHB	-0.166155	-0.168773	2.25e-07	8	3.25e-05	TRUE
RANGRF	-0.0410511	0.0181735	5e-07	9	3.66e-05	TRUE
HERPUD2	0.0251014	0.0779796	5.38e-07	10	4.06e-05	TRUE
ATXN1	0.188441	0.150873	6.88e-07	11	4.47e-05	TRUE
RFK	-0.197523	-0.212679	1e-06	12	4.87e-05	TRUE
NUBPL	0.243496	0.216833	1.47e-06	13	5.28e-05	TRUE
ARPP19	-0.186702	-0.181856	1.49e-06	14	5.69e-05	TRUE
LCLAT1	0.142844	0.127394	1.61e-06	15	6.09e-05	TRUE
DNASE1L1	0.0160757	0.0917699	2e-06	16	6.5e-05	TRUE
TMUB2	0.116952	0.0932642	2.69e-06	17	6.9e-05	TRUE
AGTPBP1	-0.0931686	-0.139578	3.17e-06	18	7.31e-05	TRUE
DERL1	0.197731	0.194182	3.24e-06	19	7.72e-05	TRUE
TMCO1	0.133921	0.123886	3.26e-06	20	8.12e-05	TRUE
RAP1GDS1	-0.187426	-0.233331	3.47e-06	21	8.53e-05	TRUE
RBMS1	0.119902	0.0742812	3.71e-06	22	8.94e-05	TRUE
DCK	-0.208782	-0.191132	4.05e-06	23	9.34e-05	TRUE
CHMP7	-0.212014	-0.16688	4.32e-06	24	9.75e-05	TRUE
ECHDC1	-0.123009	-0.113083	4.39e-06	25	0.000101535	TRUE
RAD50	0.121915	0.12292	4.92e-06	26	0.000105597	TRUE
PLEC	0.118631	0.140151	5.12e-06	27	0.000109658	TRUE
PTPRF	0.185016	0.192568	5.14e-06	28	0.000113719	TRUE
TDRKH	0.115928	0.134238	5.86e-06	29	0.000117781	TRUE
L1RE1	0.115228	0.112803	5.99e-06	30	0.000121842	TRUE
NBN	0.166905	0.146764	6.37e-06	31	0.000125904	TRUE
PPP2R2A	-0.16273	-0.131599	6.61e-06	32	0.000129965	TRUE
PLEC.3	0.145438	0.110326	6.84e-06	33	0.000134026	TRUE
RCHY1	-0.120252	-0.136261	7.79e-06	34	0.000138088	TRUE
NARS	-0.153545	-0.119822	7.92e-06	35	0.000142149	TRUE
MARCKS	0.139314	0.079866	8.01e-06	36	0.000146211	TRUE
RECQL5	0.181256	0.179698	1.01e-05	37	0.000150272	TRUE
PPP2R2B	-0.0921861	-0.122987	1.07e-05	38	0.000154334	TRUE
PCNP	-0.235602	-0.254413	1.13e-05	39	0.000158395	TRUE
PDXP	-0.233096	-0.214751	1.18e-05	40	0.000162456	TRUE
LMNA	0.171983	0.161155	1.24e-05	41	0.000166518	TRUE
ZBED3	-0.090871	-0.106415	1.26e-05	42	0.000170579	TRUE
HM13	0.12248	0.102108	1.31e-05	43	0.000174641	TRUE
CARM1	-0.175847	-0.19568	1.43e-05	44	0.000178702	TRUE
C6orf89	0.0343458	0.0678957	1.53e-05	45	0.000182763	TRUE
PPAT	-0.178523	-0.151502	1.54e-05	46	0.000186825	TRUE
PMS2	-0.00631621	0.0287224	1.56e-05	47	0.000190886	TRUE
PLXNA1	0.147643	0.152057	1.58e-05	48	0.000194948	TRUE
CD59	0.134896	0.135341	1.61e-05	49	0.000199009	TRUE
TSPYL5	0.0664991	0.132003	1.7e-05	50	0.00020307	TRUE
KMT2B	0.0927884	0.0846457	1.7e-05	51	0.000207132	TRUE
ZNF512B	0.102334	0.131345	1.85e-05	52	0.000211193	TRUE
SMAD4	-0.157933	-0.151859	1.87e-05	53	0.000215255	TRUE
SVIL	0.13295	0.126197	1.91e-05	54	0.000219316	TRUE
C16orf13	-0.117091	-0.0937023	1.92e-05	55	0.000223377	TRUE
SHPK	-0.0664733	-0.0791312	1.92e-05	56	0.000227439	TRUE
PTRF	0.21317	0.208143	1.96e-05	57	0.0002315	TRUE
BCAP31	0.110155	0.153073	2e-05	58	0.000235562	TRUE
PASK	-0.0393636	-0.00247473	2.14e-05	59	0.000239623	TRUE
RNF126	-0.188337	-0.198951	2.54e-05	60	0.000243685	TRUE
YIPF4	0.0653975	0.128311	2.62e-05	61	0.000247746	TRUE
MUC1	0.066866	0.0878095	2.65e-05	62	0.000251807	TRUE
KIAA1217	0.0449061	0.0854287	2.67e-05	63	0.000255869	TRUE
SMAP	-0.161472	-0.168987	2.67e-05	64	0.00025993	TRUE
RPL38	-0.119223	-0.109363	2.68e-05	65	0.000263992	TRUE
ORMDL2	0.131269	0.172792	2.76e-05	66	0.000268053	TRUE
S100A10	0.116708	0.12262	2.78e-05	67	0.000272114	TRUE
NR3C1	0.0397473	0.0549962	2.93e-05	68	0.000276176	TRUE
CTSV	0.0508659	0.0948068	2.98e-05	69	0.000280237	TRUE
PCDH7	0.106167	0.128004	3.29e-05	70	0.000284299	TRUE
VPS37A	-0.172173	-0.128695	3.36e-05	71	0.00028836	TRUE
CTH	-0.0292188	-0.0635173	3.64e-05	72	0.000292421	TRUE
PEX13	0.0737538	0.0804484	3.67e-05	73	0.000296483	TRUE
EIF4EBP1	-0.0998978	-0.059351	3.68e-05	74	0.000300544	TRUE
C20orf24	0.0942471	0.113634	3.69e-05	75	0.000304606	TRUE
PURB	0.130839	0.106747	3.84e-05	76	0.000308667	TRUE
FAM63A	0.12468	0.147558	4.1e-05	77	0.000312728	TRUE
FAM213A	0.0604691	0.101966	4.43e-05	78	0.00031679	TRUE
VPS4B	-0.177687	-0.155062	4.44e-05	79	0.000320851	TRUE
ZFC3H1	0.150295	0.170966	4.44e-05	80	0.000324913	TRUE
MLH1	-0.0370601	-0.0524117	4.55e-05	81	0.000328974	TRUE
GIT1	-0.216439	-0.174392	4.62e-05	82	0.000333035	TRUE
HDDC2	-0.137463	-0.133095	4.67e-05	83	0.000337097	TRUE
NSDHL	0.131928	0.154983	4.93e-05	84	0.000341158	TRUE
HSPA2	-0.0024381	0.0807936	5.12e-05	85	0.00034522	TRUE
PAICS	-0.196267	-0.179733	5.46e-05	86	0.000349281	TRUE
FITM2	0.100066	0.0985114	5.55e-05	87	0.000353343	TRUE
C6orf47	0.0525477	0.0630897	5.65e-05	88	0.000357404	TRUE
CTDP1	-0.151754	-0.182088	5.89e-05	89	0.000361465	TRUE
MRE11A	0.137994	0.109602	5.92e-05	90	0.000365527	TRUE
PIGU	0.109454	0.0834315	6.04e-05	91	0.000369588	TRUE
USP47	-0.177719	-0.129722	6.05e-05	92	0.00037365	TRUE
DLG5	0.0873454	0.115743	6.24e-05	93	0.000377711	TRUE
GTF2E2	-0.164904	-0.15749	6.3e-05	94	0.000381772	TRUE
ETNK1	-0.121112	-0.151065	6.33e-05	95	0.000385834	TRUE
FMR1	0.0766209	0.0779195	6.41e-05	96	0.000389895	TRUE
STX5	0.169794	0.209858	6.6e-05	97	0.000393957	TRUE
SEPTIN10	0.0807189	0.107231	6.67e-05	98	0.000398018	TRUE
PALM2	0.188577	0.177115	6.73e-05	99	0.000402079	TRUE
SPAG7	-0.160562	-0.159223	6.84e-05	100	0.000406141	TRUE
NPTN	0.128467	0.161695	7.05e-05	101	0.000410202	TRUE
SLC2A13	-0.073977	-0.0828778	7.3e-05	102	0.000414264	TRUE
PINX1	-0.174312	-0.133004	7.46e-05	103	0.000418325	TRUE
NCOR2	0.115631	0.121411	8e-05	104	0.000422386	TRUE
RPS19	-0.131213	-0.110515	8e-05	105	0.000426448	TRUE
PDE12	-0.154258	-0.193268	8.09e-05	106	0.000430509	TRUE
HM13.1	0.101499	0.0689566	8.71e-05	107	0.000434571	TRUE
DST	0.0502046	0.0183618	8.76e-05	108	0.000438632	TRUE
MTCH1	0.125205	0.125024	8.87e-05	109	0.000442694	TRUE
NIPBL	0.140719	0.16605	8.87e-05	110	0.000446755	TRUE
DCP1A	-0.169219	-0.197599	8.96e-05	111	0.000450816	TRUE
EGFR	0.0739023	0.096171	9.07e-05	112	0.000454878	TRUE
RPRD1B	0.128165	0.126186	9.2e-05	113	0.000458939	TRUE
TFAP2C	0.0175684	0.0272822	9.58e-05	114	0.000463001	TRUE
LMCD1	0.0923288	0.0933077	9.62e-05	115	0.000467062	TRUE
ITGB5	0.116641	0.119905	9.8e-05	116	0.000471123	TRUE
POFUT1	0.143877	0.145901	9.92e-05	117	0.000475185	TRUE
TMX2	0.0887626	0.150084	0.000103737	118	0.000479246	TRUE
VMA21	0.0541827	0.114619	0.000105202	119	0.000483308	TRUE
G6PD	0.139195	0.181408	0.000108109	120	0.000487369	TRUE
HAUS6	-0.172876	-0.144947	0.000108363	121	0.00049143	TRUE
DUS1L	-0.0706065	-0.109702	0.000109246	122	0.000495492	TRUE
UNC119B	-0.137839	-0.153305	0.000112226	123	0.000499553	TRUE
RPL23	-0.139444	-0.136972	0.000117162	124	0.000503615	TRUE
GPR89B	0.111298	0.151446	0.000118733	125	0.000507676	TRUE
RPL12	-0.122555	-0.142805	0.000118961	126	0.000511737	TRUE
NEK9	-0.129505	-0.130474	0.000121084	127	0.000515799	TRUE
UBA1	-0.14295	-0.128568	0.000122223	128	0.00051986	TRUE
SDHAF2	0.254629	0.177949	0.00012341	129	0.000523922	TRUE
TNFAIP2	0.0815211	0.126246	0.000125854	130	0.000527983	TRUE
SGTA	-0.12347	-0.159367	0.000125912	131	0.000532045	TRUE
MAD2L1	-0.113025	-0.129464	0.000127954	132	0.000536106	TRUE
SRR	-0.0505648	-0.0936456	0.00012889	133	0.000540167	TRUE
GPR126	-0.000325809	0.0177484	0.000129839	134	0.000544229	TRUE
TBCA	-0.232345	-0.157837	0.00013004	135	0.00054829	TRUE
IDS	0.147888	0.15204	0.000131062	136	0.000552352	TRUE
TM9SF4	0.112091	0.146103	0.000131246	137	0.000556413	TRUE
LEMD2	0.179352	0.131719	0.00013358	138	0.000560474	TRUE
SLAIN2	-0.163465	-0.157032	0.000134227	139	0.000564536	TRUE
PIK3R3	0.0124937	0.0501613	0.0001376	140	0.000568597	TRUE
YTHDF2	-0.0995104	-0.0687557	0.00013934	141	0.000572659	TRUE
PXMP4	0.0830019	0.061038	0.00014188	142	0.00057672	TRUE
FAM192A	-0.0765674	-0.0866476	0.000145033	143	0.000580781	TRUE
FAM3A	0.134182	0.130091	0.000145243	144	0.000584843	TRUE
TNFRSF10B	-0.201585	-0.227507	0.000147696	145	0.000588904	TRUE
ANXA8	0.100101	0.155269	0.000149355	146	0.000592966	TRUE
RASAL2	0.095601	0.0955333	0.000149787	147	0.000597027	TRUE
DHX35	0.19042	0.143398	0.000151758	148	0.000601088	TRUE
ADAT2	-0.0654174	-0.0804771	0.000154882	149	0.00060515	TRUE
CROT	0.00700052	0.0232218	0.000157862	150	0.000609211	TRUE
CLPTM1L	0.170414	0.158757	0.000158144	151	0.000613273	TRUE
SDC1	0.114603	0.112706	0.000162676	152	0.000617334	TRUE
S100A16	0.0812628	0.111964	0.000163135	153	0.000621395	TRUE
CBWD1	-0.110055	-0.108672	0.000163734	154	0.000625457	TRUE
PARL	0.135672	0.149255	0.000164914	155	0.000629518	TRUE
HDHD2	-0.1872	-0.157773	0.000168096	156	0.00063358	TRUE
DHFRL1	-0.117497	-0.14826	0.000173103	157	0.000637641	TRUE
THSD4	-0.0334551	0.0251912	0.000174514	158	0.000641703	TRUE
YPEL3	0.0879173	0.124968	0.000175105	159	0.000645764	TRUE
BCAM	0.068794	0.102079	0.000181352	160	0.000649825	TRUE
HTATIP2	0.110959	0.0970059	0.000182975	161	0.000653887	TRUE
HLTF	0.0714277	0.0967236	0.000188238	162	0.000657948	TRUE
NARF	-0.0954829	-0.0624099	0.000191633	163	0.00066201	TRUE
EFCAB7	0.134721	0.131596	0.000195806	164	0.000666071	TRUE
THBS1	0.124665	0.0869859	0.000195862	165	0.000670132	TRUE
UBE2R2	-0.135197	-0.163867	0.000196967	166	0.000674194	TRUE
USP28	0.154251	0.197625	0.000204099	167	0.000678255	TRUE
TMEM230	0.0686463	0.0745649	0.000207512	168	0.000682317	TRUE
DPAGT1	0.0600305	0.0452817	0.00020804	169	0.000686378	TRUE
IGF1R	0.116093	0.127626	0.000210466	170	0.000690439	TRUE
HAUS1	-0.102335	-0.118203	0.000214647	171	0.000694501	TRUE
TUFT1	0.16021	0.161561	0.000219836	172	0.000698562	TRUE
EMC4	0.0624802	0.0544979	0.000220359	173	0.000702624	TRUE
MAU2	0.0228382	0.0356157	0.000223281	174	0.000706685	TRUE
HLA.C.5	-0.000254279	0.0165935	0.000224413	175	0.000710746	TRUE
CAV1	0.140377	0.152281	0.000225955	176	0.000714808	TRUE
THOP1	-0.0982477	-0.0902293	0.000235373	177	0.000718869	TRUE
ERGIC2	0.11339	0.117114	0.000247828	178	0.000722931	TRUE
DESI1	-0.109717	-0.103049	0.000253214	179	0.000726992	TRUE
RNF121	0.111487	0.120578	0.000254561	180	0.000731054	TRUE
UBE2F	-0.088801	-0.0611487	0.000257791	181	0.000735115	TRUE
ATP6V1B2	-0.0646178	-0.052857	0.000260088	182	0.000739176	TRUE
JTB	0.123248	0.12435	0.000261751	183	0.000743238	TRUE
DHTKD1	0.0987047	0.0880807	0.000266536	184	0.000747299	TRUE
CD109	0.18528	0.158236	0.000266842	185	0.000751361	TRUE
GOLGB1	0.110925	0.0885057	0.000268036	186	0.000755422	TRUE
C19orf43	-0.150987	-0.139494	0.000270838	187	0.000759483	TRUE
CBFB.1	-0.0959626	-0.126249	0.000273498	188	0.000763545	TRUE
DNTTIP1	0.10271	0.138656	0.000273926	189	0.000767606	TRUE
YBX1	-0.0945807	-0.0911542	0.000274923	190	0.000771668	TRUE
ENOPH1	-0.101147	-0.138616	0.000283238	191	0.000775729	TRUE
ERI1	-0.136296	-0.109893	0.000290641	192	0.00077979	TRUE
EHD3	0.0600465	0.0878476	0.000293391	193	0.000783852	TRUE
ZNF195	0.112543	0.097259	0.000294311	194	0.000787913	TRUE
LRCH3	-0.077352	-0.0902772	0.00029814	195	0.000791975	TRUE
GRAMD3	0.0527613	0.099014	0.000299825	196	0.000796036	TRUE
PTGES	0.0925803	0.112215	0.000307966	197	0.000800097	TRUE
MARCKSL1	-0.153984	-0.201103	0.000310135	198	0.000804159	TRUE
TMEM14C	0.0393005	0.0803413	0.000315286	199	0.00080822	TRUE
DNAJC8	-0.0852385	-0.0847219	0.000319551	200	0.000812282	TRUE
C12orf29	-0.130221	-0.138145	0.000323067	201	0.000816343	TRUE
TRIP11	0.0611197	0.0648096	0.000331516	202	0.000820405	TRUE
EFEMP1	0.107339	0.100935	0.000333601	203	0.000824466	TRUE
HAUS4	-0.0880306	-0.0679956	0.000342445	204	0.000828527	TRUE
SCLY	-0.13855	-0.162617	0.000343844	205	0.000832589	TRUE
EIF4E	-0.103696	-0.112538	0.000345187	206	0.00083665	TRUE
LRIG3	0.0285051	0.038455	0.000345609	207	0.000840712	TRUE
SERBP1	-0.0810475	-0.113597	0.000347273	208	0.000844773	TRUE
TMEM65	0.0631302	0.0419798	0.00034754	209	0.000848834	TRUE
STX16	0.138855	0.192362	0.000351755	210	0.000852896	TRUE
UBE2N	-0.167536	-0.171611	0.000352742	211	0.000856957	TRUE
VPS45	0.0395027	0.0557013	0.000354208	212	0.000861019	TRUE
CCDC25	-0.0923161	-0.114191	0.000356634	213	0.00086508	TRUE
SLC9A8	0.0850754	0.079041	0.000363623	214	0.000869141	TRUE
LAMA5	0.0412961	0.0673833	0.000364007	215	0.000873203	TRUE
PPID	-0.155492	-0.13088	0.00036426	216	0.000877264	TRUE
CTSL	0.0516213	0.0886206	0.00036646	217	0.000881326	TRUE
CACNA2D1	0.111398	0.101273	0.0003695	218	0.000885387	TRUE
VAPB	0.097857	0.117822	0.000369743	219	0.000889448	TRUE
PML	0.199031	0.235692	0.000373562	220	0.00089351	TRUE
ADCK5	0.00123746	-0.000951185	0.00037475	221	0.000897571	TRUE
RPL11	-0.121285	-0.164663	0.000375876	222	0.000901633	TRUE
BTF3	-0.140066	-0.176845	0.000377804	223	0.000905694	TRUE
MTHFD1L	-0.0705458	-0.0894106	0.000378887	224	0.000909756	TRUE
DHFR	-0.140741	-0.154739	0.000381998	225	0.000913817	TRUE
GPR107	0.110109	0.143564	0.000388775	226	0.000917878	TRUE
LTBP1	0.0857723	0.0560683	0.000395573	227	0.00092194	TRUE
FLYWCH2	-0.173105	-0.158589	0.000396178	228	0.000926001	TRUE
QTRT1	-0.121874	-0.0833796	0.000396731	229	0.000930063	TRUE
TEAD3	0.0680438	0.0689381	0.000398879	230	0.000934124	TRUE
TXNL1	-0.176043	-0.141393	0.000399435	231	0.000938185	TRUE
TIGAR	-0.167613	-0.146343	0.000400963	232	0.000942247	TRUE
TGM2	0.0967294	0.0554537	0.000401716	233	0.000946308	TRUE
PARD3	0.0473268	0.0404084	0.000413203	234	0.00095037	TRUE
KIAA1161	0.0779669	0.0942164	0.000420859	235	0.000954431	TRUE
DPYSL2	-0.0999326	-0.109992	0.000427156	236	0.000958492	TRUE
TRPS1	0.0327309	0.0393705	0.000429752	237	0.000962554	TRUE
MSH6	-0.0108964	0.0332379	0.000430419	238	0.000966615	TRUE
TIFA	-0.106893	-0.115541	0.00044454	239	0.000970677	TRUE
EMC3	0.0491596	0.0405912	0.000451042	240	0.000974738	TRUE
PTPN1	0.0623043	0.0488512	0.000459606	241	0.000978799	TRUE
CLPTM1	0.0686015	0.0615337	0.000464682	242	0.000982861	TRUE
NCOR2.1	0.0842996	0.117069	0.000467115	243	0.000986922	TRUE
ABCC3	0.0396392	0.0855094	0.000470765	244	0.000990984	TRUE
PALMD	0.164429	0.143702	0.000473625	245	0.000995045	TRUE
OTUD3	0.0282543	0.0039916	0.000476252	246	0.000999106	TRUE
ANXA2	0.130519	0.1352	0.00047668	247	0.00100317	TRUE
TUBE1	-0.0193542	-0.0372674	0.000479038	248	0.00100723	TRUE
CUEDC2	-0.0997111	-0.0709311	0.000483218	249	0.00101129	TRUE
RABL2B	-0.0618098	-0.0686564	0.000487911	250	0.00101535	TRUE
CBFB	-0.149815	-0.14	0.00048931	251	0.00101941	TRUE
EHBP1L1	0.107111	0.154024	0.000502264	252	0.00102348	TRUE
YRDC	-0.206582	-0.221155	0.000503185	253	0.00102754	TRUE
TGS1	-0.122093	-0.120348	0.000507647	254	0.0010316	TRUE
EIF5A	-0.0498574	-0.12766	0.000514972	255	0.00103566	TRUE
FBXL4	-0.116574	-0.155038	0.000515431	256	0.00103972	TRUE
R3HCC1	-0.0587108	-0.0455981	0.000516002	257	0.00104378	TRUE
ZNF185	0.0846994	0.133283	0.000518713	258	0.00104784	TRUE
EHD1	0.0813413	0.147229	0.000521579	259	0.0010519	TRUE
TCEA1	-0.0810611	-0.0617566	0.000526505	260	0.00105597	TRUE
LTBP3	0.0785807	0.113779	0.000526811	261	0.00106003	TRUE
DIMT1	-0.0419182	-0.0889933	0.000526871	262	0.00106409	TRUE
RUFY2	0.0224546	0.0253644	0.000533773	263	0.00106815	TRUE
EMC7	0.0983495	0.0886645	0.000540366	264	0.00107221	TRUE
EIF4EBP2	-0.0636632	-0.0679401	0.000541075	265	0.00107627	TRUE
SAMD4B	0.0618337	0.0821545	0.000542695	266	0.00108033	TRUE
PLA2G16	0.0914242	0.0945895	0.000544304	267	0.0010844	TRUE
GLOD4	-0.166589	-0.136767	0.000545328	268	0.00108846	TRUE
MFN1	0.0582075	0.0617495	0.000548253	269	0.00109252	TRUE
SDC4	0.126591	0.133453	0.000552205	270	0.00109658	TRUE
ANKRD17	-0.131952	-0.0961899	0.00055718	271	0.00110064	TRUE
CRIM1	0.117036	0.122356	0.000567568	272	0.0011047	TRUE
UBE2K	-0.11191	-0.124898	0.000568502	273	0.00110877	TRUE
VPS4A	-0.147172	-0.136389	0.000571726	274	0.00111283	TRUE
TMC1	-0.0531723	-0.0324675	0.00057458	275	0.00111689	TRUE
RRM2B	-0.0933633	-0.105684	0.000576342	276	0.00112095	TRUE
ARHGAP29	0.0758169	0.0796236	0.00057671	277	0.00112501	TRUE
UBE2V2	-0.144379	-0.0688368	0.000580218	278	0.00112907	TRUE
CIAPIN1	-0.162691	-0.144802	0.000581194	279	0.00113313	TRUE
ITGA3.1	0.0117892	0.0317269	0.000583763	280	0.00113719	TRUE
PCBP2	-0.159689	-0.185722	0.000585727	281	0.00114126	TRUE
EFR3A	0.103195	0.145225	0.00059827	282	0.00114532	TRUE
ERBB4	-0.0105586	0.0497545	0.000607922	283	0.00114938	TRUE
RAB31	0.13209	0.0987496	0.000621131	284	0.00115344	TRUE
PFAS	-0.139872	-0.148147	0.000638808	285	0.0011575	TRUE
UBE2G1	-0.0940925	-0.0765457	0.000640078	286	0.00116156	TRUE
TEX2	0.0864625	0.098063	0.000651104	287	0.00116562	TRUE
MAP2K4	-0.185289	-0.134635	0.000654995	288	0.00116969	TRUE
HAUS8	-0.102317	-0.132428	0.000659052	289	0.00117375	TRUE
SH3BGRL	-0.144947	-0.196699	0.000666304	290	0.00117781	TRUE
RSRC2	-0.0864425	-0.124984	0.000668052	291	0.00118187	TRUE
GTF2B	-0.138127	-0.154183	0.000672655	292	0.00118593	TRUE
EPB41L1	0.0827232	0.110069	0.000675253	293	0.00118999	TRUE
EIF4ENIF1	-0.140993	-0.140771	0.00067866	294	0.00119405	TRUE
TRAM2	-0.0345849	-0.0564526	0.000689449	295	0.00119812	TRUE
PAK2	-0.177379	-0.168277	0.000691934	296	0.00120218	TRUE
MFSD5	0.0458656	0.0451365	0.000704917	297	0.00120624	TRUE
CLU	0.0823628	0.0747946	0.000712094	298	0.0012103	TRUE
MEX3D	-0.104427	-0.103085	0.000713336	299	0.00121436	TRUE
PROSC	-0.173295	-0.182126	0.000715163	300	0.00121842	TRUE
ABCC5	0.0300665	0.0326969	0.000715487	301	0.00122248	TRUE
ZMYND8	0.0637922	0.0393865	0.00071649	302	0.00122654	TRUE
PSMG1	-0.067855	-0.0359252	0.000719303	303	0.00123061	TRUE
TTLL12	-0.0874411	-0.13195	0.000720201	304	0.00123467	TRUE
MPZL1	0.120638	0.149147	0.00072126	305	0.00123873	TRUE
ZNF282	0.0229653	-0.0275971	0.000723013	306	0.00124279	TRUE
TMEM63A	0.185229	0.178754	0.000725762	307	0.00124685	TRUE
PDLIM3	0.0469391	0.0432449	0.000727984	308	0.00125091	TRUE
SNUPN	-0.177884	-0.0765988	0.00073465	309	0.00125497	TRUE
AURKA	0.0994162	0.111218	0.000735247	310	0.00125904	TRUE
PHLDB2	0.15692	0.124674	0.000737579	311	0.0012631	TRUE
MYOF	0.0864298	0.106904	0.000742341	312	0.00126716	TRUE
USP20	0.128912	0.166631	0.000744635	313	0.00127122	TRUE
AHNAK2	0.0614506	0.111496	0.00075448	314	0.00127528	TRUE
HAUS7	-0.049327	-0.0714298	0.000757828	315	0.00127934	TRUE
FAM195A	-0.168297	-0.141548	0.000761631	316	0.00128341	TRUE
CD58	0.168699	0.130464	0.000762014	317	0.00128747	TRUE
RTEL1	0.0749657	0.0997711	0.000768691	318	0.00129153	TRUE
XPNPEP1	-0.104181	-0.114541	0.000776848	319	0.00129559	TRUE
LRRFIP1	-0.0358658	-0.0757447	0.000780666	320	0.00129965	TRUE
MEX3C	-0.118663	-0.143461	0.000781191	321	0.00130371	TRUE
PDCD2	-0.119203	-0.0854667	0.000790104	322	0.00130777	TRUE
CRIP2	0.0645354	0.0845004	0.000796202	323	0.00131183	TRUE
EMD	0.082694	0.120748	0.000799211	324	0.0013159	TRUE
ECE1	0.0958193	0.0740692	0.000799733	325	0.00131996	TRUE
IL13RA1	0.048432	0.0652982	0.000799996	326	0.00132402	TRUE
PCBP3	-0.02865	-0.0855391	0.000800167	327	0.00132808	TRUE
MIER3	-0.130547	-0.110953	0.000800438	328	0.00133214	TRUE
TATDN3	-0.107965	-0.133518	0.000806201	329	0.0013362	TRUE
TGM5	0.0145517	0.0102938	0.000806927	330	0.00134026	TRUE
SLC39A1	0.111782	0.0785037	0.000807161	331	0.00134433	TRUE
PBXIP1	0.166243	0.152951	0.000814522	332	0.00134839	TRUE
CTSA	0.0982304	0.0725453	0.000814524	333	0.00135245	TRUE
RPIA	-0.124549	-0.15666	0.000838982	334	0.00135651	TRUE
ANKRD26	0.0324405	0.066938	0.00084757	335	0.00136057	TRUE
PTER	-0.1663	-0.151515	0.000848805	336	0.00136463	TRUE
GOLGB1.1	-0.000443026	0.00606699	0.000849848	337	0.0013687	TRUE
APEH	-0.0769813	-0.11702	0.000856719	338	0.00137276	TRUE
TTC19	-0.0744709	-0.107805	0.000860923	339	0.00137682	TRUE
SNX14	0.0684655	0.0699236	0.000878663	340	0.00138088	TRUE
RRBP1	0.0798475	0.0310271	0.000884236	341	0.00138494	TRUE
MARCHF6	0.0863098	0.0662115	0.000893237	342	0.001389	TRUE
PSAT1	-0.107625	-0.0964757	0.000893526	343	0.00139306	TRUE
UBE2NL	-0.171781	-0.136594	0.000901034	344	0.00139712	TRUE
PLP2	0.0323624	0.0375933	0.000901074	345	0.00140119	TRUE
DFFA	-0.104966	-0.127228	0.00090822	346	0.00140525	TRUE
TSPAN15	0.0712893	0.107956	0.000911152	347	0.00140931	TRUE
FAM118A	-0.0453738	-0.0458523	0.000912156	348	0.00141337	TRUE
PABPC1L	-0.153507	-0.11455	0.000919248	349	0.00141743	TRUE
PXK	0.0140748	0.0197223	0.000922228	350	0.00142149	TRUE
MSRA	-0.0793419	-0.132469	0.000929026	351	0.00142555	TRUE
MBOAT2	0.105251	0.12215	0.000936228	352	0.00142962	TRUE
KMT2D	0.0431226	0.062827	0.000938082	353	0.00143368	TRUE
PVRL4	0.0220532	0.0386054	0.000941551	354	0.00143774	TRUE
C11orf52	-0.11788	-0.08696	0.00094183	355	0.0014418	TRUE
LYPLA1	-0.0341716	-0.0384698	0.000944022	356	0.00144586	TRUE
AP3S1	-0.0826126	-0.119088	0.000944678	357	0.00144992	TRUE
CIT	0.0862218	0.0923689	0.000954072	358	0.00145398	TRUE
HSPA1L	0.109552	0.153799	0.000981238	359	0.00145805	TRUE
BET1	0.107301	0.118754	0.000992942	360	0.00146211	TRUE
METAP1	-0.103315	-0.146165	0.00100022	361	0.00146617	TRUE
ELP2	-0.223198	-0.17016	0.00100339	362	0.00147023	TRUE
SFMBT2	0.010118	0.0370463	0.00101267	363	0.00147429	TRUE
C1orf52	-0.104	-0.0875552	0.00101496	364	0.00147835	TRUE
SURF4	0.124896	0.144541	0.00101575	365	0.00148241	TRUE
AHNAK	0.120817	0.0734987	0.00102054	366	0.00148648	TRUE
TRMT13	-0.0325497	-0.07463	0.00102335	367	0.00149054	TRUE
FLOT1	0.139087	0.0981684	0.00103605	368	0.0014946	TRUE
PAXIP1	0.101738	0.0997724	0.0010431	369	0.00149866	TRUE
SLC25A35	0.0358427	0.0773315	0.00104832	370	0.00150272	TRUE
SMIM7	0.0932435	0.106322	0.00105051	371	0.00150678	TRUE
C9orf40	0.0523396	0.0405446	0.00105568	372	0.00151084	TRUE
ATP2B1	0.125694	0.125073	0.00105891	373	0.0015149	TRUE
WIBG	-0.153413	-0.130742	0.00106032	374	0.00151897	TRUE
LEPREL1	0.0437273	0.0741675	0.00106301	375	0.00152303	TRUE
RIOK2	-0.0542354	-0.101385	0.00106621	376	0.00152709	TRUE
ENOX1	-0.125681	-0.156506	0.00106651	377	0.00153115	TRUE
HAUS3	-0.114437	-0.138451	0.00107562	378	0.00153521	TRUE
BAIAP2	0.0577118	0.0805945	0.00107946	379	0.00153927	TRUE
ASMTL	-0.0756276	-0.0812436	0.00108025	380	0.00154334	TRUE
UBFD1	-0.182169	-0.146708	0.00109537	381	0.0015474	TRUE
ECE2	-0.133719	-0.0948621	0.00109703	382	0.00155146	TRUE
ADH5	-0.162436	-0.0948775	0.00110469	383	0.00155552	TRUE
NRM	0.0936652	0.0967261	0.00110962	384	0.00155958	TRUE
TBCEL	-0.0547821	-0.0579386	0.00111678	385	0.00156364	TRUE
RPS27A	-0.112968	-0.127968	0.00113324	386	0.0015677	TRUE
CANT1	0.135268	0.088673	0.00114483	387	0.00157176	TRUE
ZMPSTE24	0.0384261	0.0758819	0.00116748	388	0.00157583	TRUE
SETX	0.0319631	0.087177	0.00118026	389	0.00157989	TRUE
CORO7	-0.0847664	-0.0670662	0.0011852	390	0.00158395	TRUE
AKR1A1	-0.145261	-0.121133	0.00119476	391	0.00158801	TRUE
LUC7L	-0.17301	-0.160728	0.00119995	392	0.00159207	TRUE
TRIM29	0.0779282	0.175129	0.00120309	393	0.00159613	TRUE
MBLAC2	-0.121825	-0.181358	0.00120609	394	0.0016002	TRUE
ACSF2	0.0875713	0.0999087	0.00120702	395	0.00160426	TRUE
KIF2A	-0.107689	-0.135684	0.00120712	396	0.00160832	TRUE
BAIAP2L1	0.0419828	0.0527914	0.00120985	397	0.00161238	TRUE
AVEN	-0.076563	-0.162102	0.00122875	398	0.00161644	TRUE
PDCD1LG2	0.0204329	0.0384729	0.00122969	399	0.0016205	TRUE
UBE3A	-0.153232	-0.134822	0.00123368	400	0.00162456	TRUE
ZNF827	0.0947216	0.115271	0.00125963	401	0.00162863	TRUE
NUTF2	-0.228103	-0.180158	0.0012775	402	0.00163269	TRUE
ADO	-0.160563	-0.109613	0.00128108	403	0.00163675	TRUE
RPE	-0.151649	-0.0884579	0.0012828	404	0.00164081	TRUE
TGFB2	0.109683	0.105106	0.00128761	405	0.00164487	TRUE
MORF4L2	0.112918	0.12169	0.00129464	406	0.00164893	TRUE
PKP1	0.0626475	0.110954	0.00129783	407	0.00165299	TRUE
NUDT15	-0.0763665	-0.0872937	0.00131233	408	0.00165705	TRUE
TPCN1	0.0532356	0.0652053	0.00131326	409	0.00166112	TRUE
GOLGA5	0.0948188	0.0903385	0.00131888	410	0.00166518	TRUE
PIGK	0.139878	0.137389	0.0013299	411	0.00166924	TRUE
TMEM41A	0.157469	0.184014	0.00133944	412	0.0016733	TRUE
RPS5	-0.194507	-0.152896	0.00134033	413	0.00167736	TRUE
SPTBN2	0.0383174	0.0892151	0.00134366	414	0.00168142	TRUE
LMAN2L	0.12001	0.133685	0.00136204	415	0.00168549	TRUE
RBM33	-0.175332	-0.198085	0.00136544	416	0.00168955	TRUE
DCTPP1	-0.106975	-0.131186	0.00136637	417	0.00169361	TRUE
SUGT1	-0.115323	-0.108776	0.00136797	418	0.00169767	TRUE
AAED1	0.0936625	0.0949933	0.00137791	419	0.00170173	TRUE
MMGT1	0.129052	0.102847	0.00138272	420	0.00170579	TRUE
KYNU	0.038076	0.0734769	0.0013828	421	0.00170985	TRUE
SUN1	0.071165	0.061319	0.00138489	422	0.00171391	TRUE
DDR1	0.0766479	0.103471	0.00138503	423	0.00171798	TRUE
DTWD1	0.00262054	-0.0238132	0.00138651	424	0.00172204	TRUE
PFKM	-0.102401	-0.0936348	0.00139116	425	0.0017261	TRUE
SPNS1	0.0274299	0.0603293	0.00140389	426	0.00173016	TRUE
PSMA1	-0.0607955	-0.114239	0.00140674	427	0.00173422	TRUE
RPS6KA1	-0.168574	-0.1748	0.00140851	428	0.00173828	TRUE
TMPO.1	-0.225432	-0.161798	0.00141152	429	0.00174234	TRUE
TMEM189	0.118485	0.0600875	0.00142317	430	0.00174641	TRUE
ACYP1	-0.178659	-0.18326	0.00142932	431	0.00175047	TRUE
TMEM101	-0.0192343	-0.0352526	0.00143099	432	0.00175453	TRUE
ERGIC3	0.142461	0.158833	0.00143486	433	0.00175859	TRUE
ITGA3	0.121687	0.104389	0.00143688	434	0.00176265	TRUE
PPIC	0.033051	0.0295349	0.00144137	435	0.00176671	TRUE
CNTN5	-0.152866	-0.131991	0.00145802	436	0.00177077	TRUE
CAAP1	-0.0968712	-0.114752	0.00146035	437	0.00177484	TRUE
ILKAP	-0.113885	-0.176386	0.00146622	438	0.0017789	TRUE
SEMA3C	0.162663	0.144351	0.00146951	439	0.00178296	TRUE
TEAD2	0.0557974	0.0389815	0.00148155	440	0.00178702	TRUE
SMAP2	-0.0954055	-0.0711478	0.00148513	441	0.00179108	TRUE
NOB1	-0.135444	-0.115059	0.00148632	442	0.00179514	TRUE
SESN2	-0.0437559	-0.0788963	0.00148795	443	0.0017992	TRUE
KDM2A	0.120683	0.14831	0.00150348	444	0.00180327	TRUE
TYW3	-0.0482031	-0.0711265	0.00150792	445	0.00180733	TRUE
CCDC127	0.0896043	0.0780814	0.0015103	446	0.00181139	TRUE
FAM20B	0.103503	0.168848	0.00151706	447	0.00181545	TRUE
PLEC.1	0.0555457	0.0792695	0.00152055	448	0.00181951	TRUE
TPM1.1	0.102323	0.0763512	0.00152205	449	0.00182357	TRUE
AKR1B15	7.59e-05	0.0187361	0.00152459	450	0.00182763	TRUE
AGPAT5	-0.0781346	-0.127352	0.00152865	451	0.00183169	TRUE
RAB27B	0.0516	0.0270244	0.00153088	452	0.00183576	TRUE
SNX3	-0.110724	-0.0915621	0.00153338	453	0.00183982	TRUE
FLNA	0.140991	0.167758	0.00153801	454	0.00184388	TRUE
DCP1B	-0.186332	-0.182119	0.00153956	455	0.00184794	TRUE
PPIP5K2	-0.121012	-0.108245	0.00154672	456	0.001852	TRUE
AKR1C1	0.00907789	0.0438687	0.00156064	457	0.00185606	TRUE
AKR7A2	-0.163288	-0.16128	0.0015645	458	0.00186013	TRUE
TNKS1BP1	0.0431956	0.0578385	0.00156504	459	0.00186419	TRUE
ZMYND11	0.0363211	0.00227878	0.00157419	460	0.00186825	TRUE
SAGE1	0.103561	0.152153	0.00157443	461	0.00187231	TRUE
GPAA1	0.00990106	0.0407442	0.00158165	462	0.00187637	TRUE
RNF139	-0.0215471	0.0115746	0.00158267	463	0.00188043	TRUE
SURF1	0.0871687	0.0839653	0.00158705	464	0.00188449	TRUE
PIAS2	-0.0400086	-0.0712957	0.00159338	465	0.00188856	TRUE
TMEM109	0.177749	0.200369	0.00159521	466	0.00189262	TRUE
PLOD2	0.139759	0.0949653	0.00160745	467	0.00189668	TRUE
CPVL	0.0478542	0.0784598	0.00160793	468	0.00190074	TRUE
YIPF3	0.0580679	0.0731801	0.00160795	469	0.0019048	TRUE
ADRBK1	-0.135467	-0.129862	0.0016123	470	0.00190886	TRUE
MANF	-0.0846863	-0.127905	0.0016198	471	0.00191292	TRUE
ATP9A	0.0274782	0.0448619	0.00162305	472	0.00191698	TRUE
PRKCDBP	0.141656	0.115433	0.00163102	473	0.00192105	TRUE
MTMR6	-0.0589551	0.00424107	0.00163342	474	0.00192511	TRUE
KIF14	0.0593851	0.0707165	0.00163444	475	0.00192917	TRUE
TMA7	-0.153945	-0.131332	0.00163921	476	0.00193323	TRUE
STMN1	-0.123788	-0.0861437	0.00164483	477	0.00193729	TRUE
ARHGAP25	-0.0328384	-0.0318173	0.00165729	478	0.00194135	TRUE
AKR1B10	0.0196263	0.013517	0.00165985	479	0.00194542	TRUE
ATP6V1G1	-0.0681005	-0.118919	0.00167037	480	0.00194948	TRUE
PDPK1	-0.0955145	-0.0945198	0.00167954	481	0.00195354	TRUE
SMARCB1	0.130669	0.113763	0.00168996	482	0.0019576	TRUE
ACP2	0.0316071	0.0148426	0.00169353	483	0.00196166	TRUE
ERLEC1	0.0886327	0.0439187	0.00169676	484	0.00196572	TRUE
CAV2	0.108207	0.106014	0.00169687	485	0.00196978	TRUE
RPS21	-0.00454358	-0.0341438	0.00169729	486	0.00197385	TRUE
TOP3B	-0.135173	-0.123241	0.00170144	487	0.00197791	TRUE
GTF3A	0.00675122	0.0019329	0.00170406	488	0.00198197	TRUE
PCBP4	-0.110148	-0.140878	0.00170921	489	0.00198603	TRUE
CCDC124	-0.124288	-0.130616	0.00171138	490	0.00199009	TRUE
FAM107B	-0.125862	-0.113294	0.00171187	491	0.00199415	TRUE
XYLT2	0.0324355	0.0397082	0.00171195	492	0.00199821	TRUE
RAB12	0.0933311	0.059281	0.00171809	493	0.00200227	TRUE
ST13	-0.165703	-0.142332	0.00172531	494	0.00200634	TRUE
SZRD1	-0.0664631	-0.0723358	0.00172651	495	0.0020104	TRUE
PIGT	0.0716538	0.0908302	0.0017266	496	0.00201446	TRUE
ARL6IP5	0.136914	0.120075	0.00172738	497	0.00201852	TRUE
RRBP1.1	0.105909	0.0555377	0.00174072	498	0.00202258	TRUE
HBS1L.1	-0.0686929	-0.0667132	0.00175028	499	0.00202664	TRUE
DDI2	-0.120415	-0.114311	0.00175149	500	0.0020307	TRUE
SQSTM1	0.0850702	0.14894	0.00176182	501	0.00203477	TRUE
NA.9	0.0448929	0.0409487	0.00176206	502	0.00203883	TRUE
S100A11	0.0662408	0.111743	0.00176233	503	0.00204289	TRUE
PGM2	-0.0817123	-0.0941282	0.00178004	504	0.00204695	TRUE
ARHGAP21	0.0895119	0.0530987	0.00178583	505	0.00205101	TRUE
SGTB	-0.151563	-0.17076	0.00179404	506	0.00205507	TRUE
RAPGEF6	-0.0833757	-0.0680992	0.00179516	507	0.00205913	TRUE
DARS2	0.0536717	0.0709584	0.00181496	508	0.0020632	TRUE
SCFD1	0.108793	0.102268	0.00182344	509	0.00206726	TRUE
NO66	0.137047	0.107626	0.0018258	510	0.00207132	TRUE
RWDD4	-0.083998	-0.0897223	0.00182645	511	0.00207538	TRUE
PAPSS1	-0.165284	-0.177251	0.00183343	512	0.00207944	TRUE
TP53	0.188118	0.229964	0.00183946	513	0.0020835	TRUE
PARK7	-0.130136	-0.151592	0.00185008	514	0.00208756	TRUE
CACNA2D1.1	0.0198198	0.0247513	0.00185723	515	0.00209163	TRUE
NT5E	0.106323	0.0421681	0.00186743	516	0.00209569	TRUE
ZMYND19	0.0317125	0.0543834	0.00187149	517	0.00209975	TRUE
EXD2	0.0519014	0.0672896	0.00188652	518	0.00210381	TRUE
NGFR	0.05427	0.115651	0.00189262	519	0.00210787	TRUE
ITGA2	0.0521176	0.00855394	0.00189898	520	0.00211193	TRUE
MBD4	0.083729	0.105542	0.00190984	521	0.00211599	TRUE
ARHGEF17	0.100404	0.116316	0.00191711	522	0.00212006	TRUE
NUDT4.1	-0.0979668	-0.123653	0.00192027	523	0.00212412	TRUE
DOK3	0.0923117	0.126007	0.00192995	524	0.00212818	TRUE
KCNN4	0.111437	0.118993	0.00194085	525	0.00213224	TRUE
IKZF1	-0.0258495	0.0114162	0.0019641	526	0.0021363	TRUE
HCFC2	0.0467895	0.0589918	0.00197287	527	0.00214036	TRUE
PTPRC	-0.123009	-0.0914915	0.0019812	528	0.00214442	TRUE
CLOCK	0.082087	0.0820962	0.00198409	529	0.00214848	TRUE
EPPK1	0.0381189	0.0806014	0.00200585	530	0.00215255	TRUE
ELL2	0.0416209	0.040344	0.00200987	531	0.00215661	TRUE
VWA1	0.00914061	-0.0015599	0.00201178	532	0.00216067	TRUE
BHLHE41	-0.00249769	-0.0029604	0.0020182	533	0.00216473	TRUE
MUL1	0.0471552	0.0225286	0.00201903	534	0.00216879	TRUE
ATP6V1E1	-0.115693	-0.0952335	0.00202398	535	0.00217285	TRUE
ANO6	0.0340461	0.0417954	0.00203684	536	0.00217692	TRUE
BAK1	0.0672682	0.0682205	0.00205148	537	0.00218098	TRUE
YIPF5	0.0324504	0.0421812	0.00205416	538	0.00218504	TRUE
ANKHD1	-0.18829	-0.13888	0.00206235	539	0.0021891	TRUE
HAT1	-0.147302	-0.0850577	0.00207019	540	0.00219316	TRUE
TNFRSF13C	0.143744	0.162506	0.00208132	541	0.00219722	TRUE
NUMA1	0.158399	0.11739	0.00208522	542	0.00220128	TRUE
CORO1A	-0.0883506	-0.0703329	0.00209882	543	0.00220535	TRUE
TMTC3	0.0573113	0.0955303	0.00210392	544	0.00220941	TRUE
DDX27	0.124346	0.0864228	0.00211293	545	0.00221347	TRUE
FAM3C	0.141359	0.0695206	0.00211709	546	0.00221753	TRUE
ZNF687	0.11094	0.0716208	0.00211852	547	0.00222159	TRUE
PRPF6	0.0799711	0.0745125	0.00212233	548	0.00222565	TRUE
NEIL2	-0.00612217	-0.0022656	0.00212372	549	0.00222971	TRUE
KIAA1211L	0.000750044	-0.0129914	0.00212686	550	0.00223377	TRUE
RRM1	-0.207648	-0.15444	0.00213516	551	0.00223784	TRUE
RPL37	-0.158756	-0.1504	0.00216407	552	0.0022419	TRUE
NRAS	0.0800027	0.0593174	0.00217597	553	0.00224596	TRUE
STK39	-0.151135	-0.15168	0.00219276	554	0.00225002	TRUE
NFKB1	-0.0880218	-0.138207	0.00220692	555	0.00225408	TRUE
CPNE8	0.0430135	0.0730775	0.0022253	556	0.00225814	TRUE
MOSPD1	0.126379	0.0943936	0.00223097	557	0.00226221	TRUE
PDK1	-0.0696409	-0.0902487	0.00225665	558	0.00226627	TRUE
ZNF330	-0.146988	-0.136895	0.00225771	559	0.00227033	TRUE
NUDCD2	-0.163214	-0.116555	0.00226418	560	0.00227439	TRUE
ATP2B4	0.115032	0.100684	0.00227566	561	0.00227845	TRUE
ABRACL	-0.133601	-0.145968	0.0023004	562	0.00228251	FALSE
DIS3	-0.0837719	-0.133923	0.00230978	563	0.00228657	FALSE
HSPB8	0.0460546	0.0886287	0.00233069	564	0.00229063	FALSE
KLHL9	-0.0257796	-0.0454664	0.00233186	565	0.0022947	FALSE
KIAA1522	0.0241771	0.0685206	0.00233721	566	0.00229876	FALSE
IRF8	0.022677	-0.0171037	0.0023466	567	0.00230282	FALSE
GABARAPL1	-0.0976402	-0.0800029	0.00234747	568	0.00230688	FALSE
SGPL1	0.0860559	0.101076	0.00235361	569	0.00231094	FALSE
POLR2M	-0.154326	-0.119215	0.00236828	570	0.002315	FALSE
SPECC1L	0.116025	0.0716625	0.00237166	571	0.00231906	FALSE
TMED1	0.0765717	0.0289535	0.00237199	572	0.00232313	FALSE
NUP50	-0.16979	-0.218062	0.00239218	573	0.00232719	FALSE
GRHPR	-0.104316	-0.109932	0.00239271	574	0.00233125	FALSE
DHRS3	0.0549801	0.0481901	0.00239388	575	0.00233531	FALSE
C1orf131	-0.118656	-0.130852	0.00240202	576	0.00233937	FALSE
OSMR	0.10014	0.0808958	0.00240438	577	0.00234343	FALSE
TACO1	0.0286482	0.0639279	0.0024576	578	0.00234749	FALSE
COX20	0.0287067	0.0454062	0.00247504	579	0.00235156	FALSE
C14orf93	0.104662	0.135561	0.00247966	580	0.00235562	FALSE
PIK3AP1	-0.0488655	-0.0153268	0.0024873	581	0.00235968	FALSE
KIAA1211	-0.143208	-0.134425	0.00249174	582	0.00236374	FALSE
TFB2M	0.101043	0.0989203	0.00249578	583	0.0023678	FALSE
RAB22A	0.0482113	-0.00707254	0.00251002	584	0.00237186	FALSE
CTNND1	0.0260405	0.0595061	0.00255191	585	0.00237592	FALSE
NFS1	0.138271	0.0955305	0.00255956	586	0.00237998	FALSE
CTNND1.1	0.0393963	0.098795	0.00256776	587	0.00238405	FALSE
GGCX	0.0507358	0.0902233	0.00257177	588	0.00238811	FALSE
MORF4L1	0.0350912	0.0796842	0.00259533	589	0.00239217	FALSE
KIAA1143	-0.116648	-0.0997293	0.0025958	590	0.00239623	FALSE
RPAIN	-0.0574291	-0.0256463	0.0026116	591	0.00240029	FALSE
RPS6KA3	-0.0745466	-0.119327	0.00261582	592	0.00240435	FALSE
IL6ST	0.138553	0.0879356	0.00261663	593	0.00240842	FALSE
HNRNPUL2	0.171513	0.0934876	0.00262768	594	0.00241248	FALSE
RAB1B	0.11596	0.143649	0.00263622	595	0.00241654	FALSE
GNG12	0.0899594	0.0195807	0.00264146	596	0.0024206	FALSE
SLC2A1	-0.00192724	0.0498026	0.00265469	597	0.00242466	FALSE
LONP1	-0.190811	-0.193951	0.00265728	598	0.00242872	FALSE
PPP1R13L	0.0320474	0.075002	0.00266104	599	0.00243278	FALSE
TRAM1	0.163282	0.171033	0.00267397	600	0.00243684	FALSE
RCSD1	-0.1184	-0.0872045	0.00267454	601	0.00244091	FALSE
TMEM106B	0.0437633	0.0725502	0.00267491	602	0.00244497	FALSE
CASP3	-0.166213	-0.109841	0.00271211	603	0.00244903	FALSE
ACTN1	0.0735987	0.0810407	0.00271873	604	0.00245309	FALSE
PAK4	0.0764132	0.0767018	0.00273149	605	0.00245715	FALSE
SMARCA1	0.0320054	0.0800774	0.00276429	606	0.00246121	FALSE
GCHFR	-0.0285254	-0.0585291	0.00277029	607	0.00246527	FALSE
DNAJC7	-0.0881484	-0.0799381	0.00277281	608	0.00246934	FALSE
ANLN	0.114594	0.0853989	0.00278492	609	0.0024734	FALSE
TRIM11	0.14957	0.130996	0.00280993	610	0.00247746	FALSE
TCF25	-0.0401043	-0.0471644	0.00281158	611	0.00248152	FALSE
UBA6	-0.104109	-0.138388	0.00281477	612	0.00248558	FALSE
NAA10	-0.111507	-0.109694	0.00281586	613	0.00248964	FALSE
SMARCC2	0.102943	0.133825	0.00282034	614	0.00249371	FALSE
CDC37L1	-0.102771	-0.073573	0.00283646	615	0.00249777	FALSE
PTTG1	-0.0213238	-0.0334838	0.00286947	616	0.00250183	FALSE
KCT2	0.0257729	0.0633811	0.00287476	617	0.00250589	FALSE
RPS10	-0.0911994	-0.0823115	0.00290714	618	0.00250995	FALSE
HMGN1	-0.168127	-0.139629	0.00290795	619	0.00251401	FALSE
AKT1	-0.140212	-0.133238	0.0029236	620	0.00251807	FALSE
SMARCAD1	-0.137539	-0.127889	0.00294471	621	0.00252214	FALSE
EEF2	-0.180317	-0.157391	0.002947	622	0.0025262	FALSE
RPLP2	-0.14442	-0.135766	0.00295554	623	0.00253026	FALSE
SOWAHC	0.0282362	0.0206814	0.00297061	624	0.00253432	FALSE
TMEM194A	0.0281786	0.0746466	0.00299006	625	0.00253838	FALSE
PCMT1	-0.0693597	-0.0544529	0.00299444	626	0.00254244	FALSE
FAM120B	-0.10374	-0.122743	0.00299634	627	0.0025465	FALSE
HN1	-0.0946637	-0.130958	0.00300589	628	0.00255056	FALSE
STEAP4	-0.095626	-0.105835	0.00301498	629	0.00255463	FALSE
DHCR24	0.066786	0.127152	0.0030161	630	0.00255869	FALSE
TMBIM1	0.129544	0.103781	0.00305488	631	0.00256275	FALSE
USP25	-0.0865296	-0.106702	0.00309031	632	0.00256681	FALSE
MSH3	0.0468383	-0.0125935	0.00309141	633	0.00257087	FALSE
HMGB2	-0.104043	-0.0583715	0.00309622	634	0.00257493	FALSE
PLAU	0.13015	0.141299	0.00310309	635	0.00257899	FALSE
CD82	0.0529345	0.0786123	0.00310703	636	0.00258306	FALSE
GTPBP1	-0.13409	-0.136279	0.00312046	637	0.00258712	FALSE
TGOLN2	0.137866	0.117651	0.00313464	638	0.00259118	FALSE
KCTD3	0.0916468	0.113254	0.00314846	639	0.00259524	FALSE
MICALL2	0.0956702	0.0680424	0.00315538	640	0.0025993	FALSE
PBK	-0.159809	-0.185619	0.00316516	641	0.00260336	FALSE
CNIH4	0.0977121	0.0612317	0.00317511	642	0.00260742	FALSE
CASP2	-0.206985	-0.198716	0.00318558	643	0.00261149	FALSE
CRTC3	-0.0611711	-0.0497855	0.0032137	644	0.00261555	FALSE
GMFB	-0.184848	-0.167614	0.00326512	645	0.00261961	FALSE
PSEN2	0.0350598	0.0410996	0.00328953	646	0.00262367	FALSE
CLN3	0.160929	0.187375	0.00329641	647	0.00262773	FALSE
PFN1	-0.0457582	-0.0494819	0.00330171	648	0.00263179	FALSE
YIF1A	0.000948709	-0.0188083	0.00330293	649	0.00263585	FALSE
MLLT10	-0.0881492	-0.120028	0.00330737	650	0.00263992	FALSE
USP14	-0.111139	-0.0847324	0.00330869	651	0.00264398	FALSE
POLH	-0.100804	-0.122279	0.00331856	652	0.00264804	FALSE
C4orf32	0.114414	0.0835611	0.00332127	653	0.0026521	FALSE
FRG1	-0.0893565	-0.106166	0.00332276	654	0.00265616	FALSE
PXN.1	0.12548	0.16628	0.00333403	655	0.00266022	FALSE
SEC11A	0.0839104	0.101843	0.00333673	656	0.00266428	FALSE
ZC3H12D	0.124793	0.15998	0.00333734	657	0.00266834	FALSE
ZCCHC9	-0.0781976	-0.154138	0.00335014	658	0.00267241	FALSE
ADAM17	0.0522226	0.0993953	0.00335365	659	0.00267647	FALSE
TDRD3	-0.133916	-0.123936	0.00336419	660	0.00268053	FALSE
LMO7	0.0754661	0.0776894	0.00336448	661	0.00268459	FALSE
FMO3	-0.101756	-0.0860169	0.00336452	662	0.00268865	FALSE
ATP6AP2	-0.0235598	0.0245306	0.00337533	663	0.00269271	FALSE
HELZ	-0.0893391	-0.0493203	0.00337789	664	0.00269678	FALSE
UBE2I	-0.0969918	-0.0937444	0.0033793	665	0.00270084	FALSE
ATG4B	-0.0898822	-0.119373	0.00338327	666	0.0027049	FALSE
EHD2	0.0543647	0.0258714	0.0033874	667	0.00270896	FALSE
TMEM223	0.123198	0.152392	0.00345145	668	0.00271302	FALSE
MYB	0.0394367	0.0553428	0.00347341	669	0.00271708	FALSE
GRB7	-0.0302053	-0.0253534	0.00347404	670	0.00272114	FALSE
RANBP1	-0.0966151	-0.111303	0.00347817	671	0.00272521	FALSE
KIF3B	0.0258462	0.0867072	0.00348354	672	0.00272927	FALSE
C1QBP	-0.114637	-0.140993	0.00348857	673	0.00273333	FALSE
ZMAT3	-0.00891958	-0.00125054	0.00349783	674	0.00273739	FALSE
SORD	-0.141347	-0.10026	0.00350717	675	0.00274145	FALSE
RPL17	-0.074698	-0.0966922	0.00352016	676	0.00274551	FALSE
MICAL1	-0.14592	-0.122775	0.00353226	677	0.00274957	FALSE
APPL1	-0.141818	-0.116131	0.00354139	678	0.00275363	FALSE
LYPD3	0.0220037	0.0657724	0.00355596	679	0.0027577	FALSE
SRM	-0.141868	-0.123075	0.00357862	680	0.00276176	FALSE
NIPAL1	0.0574109	0.035169	0.00360385	681	0.00276582	FALSE
ANKRD46	-0.0766355	-0.0564457	0.00364436	682	0.00276988	FALSE
GNB2	0.172331	0.200478	0.00364876	683	0.00277394	FALSE
GOSR2	0.148025	0.124201	0.00365437	684	0.002778	FALSE
TRIQK	0.0716749	0.0722963	0.00367705	685	0.00278206	FALSE
SSH2	-0.00336146	-0.0230478	0.00368519	686	0.00278613	FALSE
GCC1	0.148949	0.120938	0.00370258	687	0.00279019	FALSE
MAN1B1	0.0723877	0.0694165	0.00370774	688	0.00279425	FALSE
MAGEA4	0.128083	0.162025	0.00371899	689	0.00279831	FALSE
AKNA	0.0415833	0.0194995	0.00373475	690	0.00280237	FALSE
KLF16	-0.0994211	-0.0925512	0.00374673	691	0.00280643	FALSE
DDX19A	-0.0797731	-0.036913	0.00375784	692	0.0028105	FALSE
GGA1	-0.0907429	-0.0964422	0.00376136	693	0.00281456	FALSE
CYP3A7	0.107337	0.115684	0.00379442	694	0.00281862	FALSE
RBMS3	0.0829548	0.0279527	0.0038222	695	0.00282268	FALSE
RPRD1A	-0.160914	-0.149254	0.00382703	696	0.00282674	FALSE
UBE2D2	-0.159358	-0.142594	0.00382855	697	0.0028308	FALSE
RMDN3	0.0139229	-0.00662592	0.0038441	698	0.00283486	FALSE
MGAT4B	0.0317616	0.0350356	0.00384889	699	0.00283892	FALSE
PTP4A3	-0.0117147	-0.0054677	0.0038503	700	0.00284299	FALSE
RABGGTA	-0.137175	-0.126668	0.00386798	701	0.00284705	FALSE
HK2	-0.00617449	-0.0166454	0.00389117	702	0.00285111	FALSE
ATG3	-0.108973	-0.103148	0.00390504	703	0.00285517	FALSE
CHMP5	-0.117273	-0.0817738	0.00391644	704	0.00285923	FALSE
VASN	0.043417	0.0790962	0.00392024	705	0.00286329	FALSE
SCMH1	0.0245583	0.0294655	0.00392775	706	0.00286735	FALSE
FAM122A	-0.0557481	-0.0820059	0.00394967	707	0.00287142	FALSE
APAF1	-0.115024	-0.106664	0.00396895	708	0.00287548	FALSE
ACTN4	0.117202	0.0909244	0.00397747	709	0.00287954	FALSE
ATIC	-0.0315316	-0.0270928	0.00398652	710	0.0028836	FALSE
ELP3	-0.174538	-0.118678	0.00400537	711	0.00288766	FALSE
C5orf28	-0.0639096	-0.0174553	0.00400865	712	0.00289172	FALSE
SEC62	0.0764358	0.0983668	0.00402767	713	0.00289578	FALSE
ATXN2L	-0.14279	-0.160494	0.00404115	714	0.00289985	FALSE
C22orf39	0.0244528	0.0337208	0.00404349	715	0.00290391	FALSE
MED12L	-0.00107445	-0.0329906	0.0040623	716	0.00290797	FALSE
UBAP2	-0.215015	-0.183435	0.00406883	717	0.00291203	FALSE
TRIM8	0.19988	0.196284	0.00407278	718	0.00291609	FALSE
PRR11	0.184277	0.167035	0.00407769	719	0.00292015	FALSE
S100A2	0.0220747	0.00450155	0.00410623	720	0.00292421	FALSE
TMED4	0.0342742	0.0325523	0.00410931	721	0.00292828	FALSE
RAB11A	0.0532282	0.112073	0.00411504	722	0.00293234	FALSE
DUS3L	-0.0251997	-0.0457754	0.00411533	723	0.0029364	FALSE
CCDC86	-0.124897	-0.104113	0.00412511	724	0.00294046	FALSE
ZNF91	-0.0519793	-0.0726279	0.00413388	725	0.00294452	FALSE
SLC52A2	0.144093	0.163696	0.00417322	726	0.00294858	FALSE
DNTT	-0.00255983	0.0287821	0.00417415	727	0.00295264	FALSE
TTC13	0.00641381	0.00152027	0.00417611	728	0.00295671	FALSE
TRAF3	-0.0147443	-0.0178415	0.00421617	729	0.00296077	FALSE
PSMD7	-0.0464932	-0.0477291	0.00421749	730	0.00296483	FALSE
TMEM132A	0.0902387	0.102593	0.00422431	731	0.00296889	FALSE
KIF23	0.0675428	0.0648297	0.00422714	732	0.00297295	FALSE
GPATCH1	0.142243	0.144555	0.00424399	733	0.00297701	FALSE
CDC40	-0.0522821	-0.066716	0.00425494	734	0.00298107	FALSE
HIST1H1A	0.0908772	0.0872999	0.00425532	735	0.00298513	FALSE
LACTB2	0.0920096	0.0427687	0.00428647	736	0.0029892	FALSE
PYGO2	0.0404168	0.0585834	0.00428661	737	0.00299326	FALSE
MSH2	-0.0323243	-0.031989	0.00433556	738	0.00299732	FALSE
SYNCRIP	-0.0867108	-0.0795961	0.00435729	739	0.00300138	FALSE
DROSHA	0.0663709	0.0617072	0.00436673	740	0.00300544	FALSE
PRSS23	-0.0228618	0.02658	0.00440315	741	0.0030095	FALSE
FAM207A	-0.154509	-0.173941	0.00441004	742	0.00301357	FALSE
ELF3	-0.0446944	-0.0489141	0.00443618	743	0.00301763	FALSE
SERGEF	-0.0139067	0.0398836	0.00444852	744	0.00302169	FALSE
RPL36	-0.130356	-0.0946832	0.0044694	745	0.00302575	FALSE
PHF2	0.0540894	0.0642818	0.00447251	746	0.00302981	FALSE
SLC23A2	0.0328141	0.064039	0.00450098	747	0.00303387	FALSE
L1CAM	0.0653317	0.0557236	0.00451382	748	0.00303793	FALSE
NDUFS7	-0.1204	-0.115278	0.00452783	749	0.003042	FALSE
LYN	-0.147356	-0.167222	0.00454618	750	0.00304606	FALSE
CORO6	0.0295361	-0.0166711	0.00454924	751	0.00305012	FALSE
NFATC3	-0.0571553	0.0136688	0.00455809	752	0.00305418	FALSE
C12orf45	-0.0115752	-0.0579405	0.00456869	753	0.00305824	FALSE
CYP1B1	0.0592503	0.0971634	0.00458417	754	0.0030623	FALSE
BLMH	-0.0995625	-0.0838689	0.00460666	755	0.00306636	FALSE
PAOX	0.050756	0.0443654	0.004624	756	0.00307042	FALSE
RPL29	-0.119416	-0.11284	0.00464165	757	0.00307449	FALSE
HIBADH	0.130717	0.0659019	0.00464761	758	0.00307855	FALSE
PPP6R2	-0.152039	-0.148978	0.00467105	759	0.00308261	FALSE
TBRG4	0.0238906	-0.00653976	0.00468044	760	0.00308667	FALSE
NOTCH2	0.0585647	0.0635079	0.00468224	761	0.00309073	FALSE
CPM	0.136359	0.136968	0.00468432	762	0.00309479	FALSE
TSKU	0.0434365	0.0744421	0.00470354	763	0.00309886	FALSE
COPS7B	-0.0991346	-0.10375	0.00473366	764	0.00310292	FALSE
CDYL	0.115713	0.114118	0.00473514	765	0.00310698	FALSE
PGRMC1	0.0389055	0.0693857	0.00475393	766	0.00311104	FALSE
BCAP29	0.118339	0.0909713	0.00475561	767	0.0031151	FALSE
ATP2A2	0.0415463	0.0565581	0.00476912	768	0.00311916	FALSE
EFNA5	0.106386	0.116282	0.00477428	769	0.00312322	FALSE
WBP4	-0.104145	-0.113976	0.00478163	770	0.00312729	FALSE
ABHD14B	-0.110249	-0.0963072	0.00478413	771	0.00313135	FALSE
RNASET2	-0.110739	-0.109694	0.0048034	772	0.00313541	FALSE
RPS15	-0.0548297	-0.0400551	0.00482399	773	0.00313947	FALSE
AKAP2	0.10648	0.0852016	0.00483784	774	0.00314353	FALSE
TM9SF3	0.0166835	0.0236138	0.00485852	775	0.00314759	FALSE
CERS5	0.0547702	0.105961	0.00486586	776	0.00315165	FALSE
ZUFSP	0.0260907	0.0530344	0.00487413	777	0.00315571	FALSE
RGS14.1	0.0467	0.0592507	0.00488375	778	0.00315978	FALSE
CDC42EP3	0.147713	0.175616	0.00488715	779	0.00316384	FALSE
CPOX	-0.0402851	-0.116061	0.00489049	780	0.0031679	FALSE
CLEC11A	-0.0158034	0.0220233	0.00489299	781	0.00317196	FALSE
NNMT	0.0535467	0.0483389	0.00491194	782	0.00317602	FALSE
EGLN1	-0.138857	-0.0983077	0.00493466	783	0.00318008	FALSE
PPP1R8	-0.107822	-0.166296	0.00494384	784	0.00318414	FALSE
EDARADD	0.162491	0.209142	0.00496382	785	0.00318821	FALSE
RPS6KA2	-0.0785379	-0.12098	0.00496404	786	0.00319227	FALSE
PLA2G7	-0.0767517	-0.105806	0.00497538	787	0.00319633	FALSE
RFX2	-0.0613787	-0.132757	0.0049996	788	0.00320039	FALSE
ANTXR1	0.158879	0.0761166	0.00501893	789	0.00320445	FALSE
ZNF462	0.0785183	0.100009	0.00503806	790	0.00320851	FALSE
PITHD1	-0.111799	-0.0631194	0.00503818	791	0.00321257	FALSE
RAB1C	0.10003	0.0694129	0.00504621	792	0.00321664	FALSE
EPHX1	0.0798904	0.135101	0.00505139	793	0.0032207	FALSE
MEGF10	0.149997	0.158917	0.00505236	794	0.00322476	FALSE
MTG2	0.0981578	0.0578686	0.00505986	795	0.00322882	FALSE
GTF2E1	-0.0448854	-0.0490411	0.00506607	796	0.00323288	FALSE
ESD	-0.078132	-0.112154	0.00507571	797	0.00323694	FALSE
FAT3	-0.177121	-0.146314	0.00508406	798	0.003241	FALSE
KIAA1430	-0.0113407	0.0142105	0.00509631	799	0.00324507	FALSE
DENND5A	0.0640408	-0.00178977	0.00509884	800	0.00324913	FALSE
BTBD1	0.0642608	0.138656	0.0051058	801	0.00325319	FALSE
RPS14	-0.148513	-0.136485	0.00510622	802	0.00325725	FALSE
MARCHF3	0.0763574	0.108611	0.00513059	803	0.00326131	FALSE
CHORDC1	-0.1157	-0.0921178	0.00516256	804	0.00326537	FALSE
MYO1C	0.0170102	0.00172617	0.00517048	805	0.00326943	FALSE
NARFL	-0.0567837	-0.0686252	0.00518074	806	0.00327349	FALSE
UBAP2L	-0.0679416	-0.0975051	0.00519099	807	0.00327756	FALSE
IGFBP6	0.0361787	0.0629833	0.00520397	808	0.00328162	FALSE
VTCN1	0.0354618	0.00675058	0.00522112	809	0.00328568	FALSE
CTSB	0.176753	0.116765	0.00525534	810	0.00328974	FALSE
GOLGA1	0.0724607	0.0618003	0.00525999	811	0.0032938	FALSE
BAZ2A	0.111296	0.156461	0.00526403	812	0.00329786	FALSE
USP43	0.127893	0.0618965	0.00528066	813	0.00330192	FALSE
SLC25A13	0.0734208	0.0158057	0.00530965	814	0.00330599	FALSE
ABHD16A	0.0816624	0.092375	0.00531201	815	0.00331005	FALSE
CCDC117	-0.145466	-0.141218	0.00531575	816	0.00331411	FALSE
ARPP21	0.0985521	0.0653003	0.00532639	817	0.00331817	FALSE
EMC1	0.0668329	0.0792471	0.00533036	818	0.00332223	FALSE
GAB2	-0.0874248	-0.0938047	0.00533092	819	0.00332629	FALSE
SEL1L	0.0796549	0.0793064	0.00533623	820	0.00333036	FALSE
SLC1A6	0.0571554	0.105593	0.00535484	821	0.00333442	FALSE
OPA3.1	0.172512	0.140894	0.00537259	822	0.00333848	FALSE
TMPRSS11E	-0.0614136	-0.0717007	0.00539555	823	0.00334254	FALSE
HDAC4	-0.132055	-0.138542	0.00541899	824	0.0033466	FALSE
TBC1D24	-0.0880652	-0.0715221	0.00542904	825	0.00335066	FALSE
FSTL4	-0.102036	-0.0613824	0.00546649	826	0.00335472	FALSE
CUX1.1	0.035172	0.0540165	0.00548706	827	0.00335878	FALSE
BCAR3	0.209518	0.170389	0.00549671	828	0.00336285	FALSE
BCAR1	0.0968233	0.0648859	0.00550742	829	0.00336691	FALSE
STMN4	-0.0727649	-0.0982654	0.00551329	830	0.00337097	FALSE
UBXN2B	0.00253828	-0.00217647	0.00551922	831	0.00337503	FALSE
RPS17L	-0.127634	-0.133055	0.00552376	832	0.00337909	FALSE
GLMN	-0.0995601	-0.100779	0.00552768	833	0.00338315	FALSE
ARHGAP17	-0.0684109	-0.0348024	0.00553947	834	0.00338721	FALSE
B4GALT1	0.0643534	0.0930207	0.00555896	835	0.00339128	FALSE
MAPKAP1	0.0592449	0.0645237	0.0055732	836	0.00339534	FALSE
GABARAPL2	-0.10805	-0.0825853	0.00557837	837	0.0033994	FALSE
PALD1	-0.0376559	-0.0653451	0.00558959	838	0.00340346	FALSE
PRPF40B	0.0273257	0.0792566	0.00559571	839	0.00340752	FALSE
NLE1	-0.171323	-0.188214	0.00560943	840	0.00341158	FALSE
SOX13	0.0642475	0.0453328	0.00563278	841	0.00341565	FALSE
HABP4	-0.0253632	-0.0817937	0.00563302	842	0.00341971	FALSE
TPBG	0.125817	0.0827182	0.00565211	843	0.00342377	FALSE
NECAP1	-0.0786091	-0.11446	0.00566523	844	0.00342783	FALSE
RCC2	-0.15091	-0.130846	0.00566992	845	0.00343189	FALSE
OGDH	0.149509	0.122285	0.00568741	846	0.00343595	FALSE
NR2F6	0.104633	0.118011	0.00571175	847	0.00344001	FALSE
PTPRK	0.0179473	-0.0154427	0.00577934	848	0.00344407	FALSE
LAP3	-0.0855133	-0.0928358	0.00580118	849	0.00344814	FALSE
MND1	0.00279546	-0.0378252	0.00581246	850	0.0034522	FALSE
PALLD	0.108676	0.0797356	0.00582597	851	0.00345626	FALSE
GIGYF2	-0.155603	-0.14567	0.00584091	852	0.00346032	FALSE
RABL6	-0.124312	-0.100939	0.00584498	853	0.00346438	FALSE
TLK2	-0.150447	-0.157911	0.00585873	854	0.00346844	FALSE
CDK5RAP2	0.00734876	0.0514252	0.00587499	855	0.0034725	FALSE
TMEM248	0.12535	0.136839	0.00588207	856	0.00347657	FALSE
SH3KBP1	-0.0475877	-0.107047	0.00588778	857	0.00348063	FALSE
FABP5	-0.181513	-0.144319	0.00589731	858	0.00348469	FALSE
FAM50A	0.113698	0.113661	0.0058985	859	0.00348875	FALSE
FXN	-0.131768	-0.129807	0.00590728	860	0.00349281	FALSE
RCE1	0.0132127	0.0715824	0.00590981	861	0.00349687	FALSE
SH3BGRL3	-0.0895238	-0.159895	0.00594543	862	0.00350093	FALSE
ESYT2.1	0.0638047	0.0770925	0.00596068	863	0.003505	FALSE
PQLC1	-0.120384	-0.127505	0.00596293	864	0.00350906	FALSE
WDR47	-0.0485398	-0.0346588	0.0059705	865	0.00351312	FALSE
ADH7	-0.126099	-0.100425	0.00598334	866	0.00351718	FALSE
ZNF592	0.0265501	0.0813686	0.00598401	867	0.00352124	FALSE
TFPI	0.0900798	0.0782307	0.00602459	868	0.0035253	FALSE
CRTC1	-0.0212653	0.0232084	0.0060587	869	0.00352936	FALSE
SNAPIN	-0.128486	-0.121871	0.00608187	870	0.00353343	FALSE
CNDP2	-0.123057	-0.104118	0.00609531	871	0.00353749	FALSE
COPS8	-0.101071	-0.107205	0.00609782	872	0.00354155	FALSE
TJP1	0.0354949	0.00603616	0.00612025	873	0.00354561	FALSE
PPP6R1	-0.0223385	-0.015962	0.00612201	874	0.00354967	FALSE
ASF1A	-0.111709	-0.101359	0.00614072	875	0.00355373	FALSE
CPNE7	-0.113211	-0.172701	0.00615688	876	0.00355779	FALSE
DKK1	0.123843	0.105089	0.00615724	877	0.00356186	FALSE
FAM177A1	0.0691135	0.0352319	0.00617881	878	0.00356592	FALSE
ECT2	0.0667095	0.070647	0.00617896	879	0.00356998	FALSE
IRF9	0.115629	0.15091	0.00622483	880	0.00357404	FALSE
C9orf41	-0.0421684	-0.056202	0.00624486	881	0.0035781	FALSE
MGAT2	0.0641591	0.0729915	0.0062772	882	0.00358216	FALSE
ALDH3B1	0.00925361	0.0293503	0.00628555	883	0.00358622	FALSE
SMURF1	0.0904001	0.134708	0.00629277	884	0.00359028	FALSE
STARD3	-0.00635584	-0.00955119	0.00630817	885	0.00359435	FALSE
C4orf27	-0.10365	-0.0790736	0.00631699	886	0.00359841	FALSE
SUPT5H	0.193928	0.135774	0.00631847	887	0.00360247	FALSE
LAMP2	0.0711091	0.0846734	0.00638373	888	0.00360653	FALSE
COL12A1	-0.01475	0.0163971	0.00639297	889	0.00361059	FALSE
DIRC2	0.01882	0.0172066	0.00640444	890	0.00361465	FALSE
NDUFA7	-0.0821856	-0.112893	0.00642654	891	0.00361872	FALSE
DIABLO	0.152371	0.134998	0.00650744	892	0.00362278	FALSE
GRAP	-0.0420933	-0.0322418	0.00652814	893	0.00362684	FALSE
EIF4H	-0.121805	-0.110496	0.00653814	894	0.0036309	FALSE
CPEB4	0.0866941	0.0846101	0.00656417	895	0.00363496	FALSE
SQLE	0.0824658	0.0933691	0.00657923	896	0.00363902	FALSE
REPS2	0.146589	0.118728	0.0065902	897	0.00364308	FALSE
LSMD1	-0.0773627	-0.0681676	0.00660293	898	0.00364715	FALSE
CRLF3	-0.0917568	-0.0641585	0.00664455	899	0.00365121	FALSE
FLOT2	0.158755	0.139556	0.00666571	900	0.00365527	FALSE
RRAS	0.0372297	0.0336091	0.00667655	901	0.00365933	FALSE
ASXL1	-0.0329695	-0.0650263	0.00668483	902	0.00366339	FALSE
EPT1	0.0728538	0.12327	0.00668699	903	0.00366745	FALSE
RPS10P5	-0.12879	-0.108718	0.00668976	904	0.00367151	FALSE
RALB	0.104772	0.0732386	0.00669203	905	0.00367557	FALSE
CYR61	0.0613221	0.0107071	0.00671172	906	0.00367964	FALSE
RNMTL1	-0.109029	-0.142909	0.006712	907	0.0036837	FALSE
OPA3	0.112939	0.0805353	0.00672314	908	0.00368776	FALSE
DOK1	-0.00949356	-0.0501196	0.00674403	909	0.00369182	FALSE
TLDC1	0.113892	0.143516	0.00677756	910	0.00369588	FALSE
NRP1	0.100228	0.0919723	0.00682129	911	0.00369994	FALSE
HBP1	0.147865	0.140735	0.00685029	912	0.003704	FALSE
XPC	-0.147387	-0.0888635	0.00686008	913	0.00370807	FALSE
F3	0.149373	0.100782	0.00686779	914	0.00371213	FALSE
SPTBN4	0.161691	0.122729	0.00688955	915	0.00371619	FALSE
MAT2B	-0.165237	-0.113801	0.00693361	916	0.00372025	FALSE
ABCD1	0.060072	0.108603	0.00695115	917	0.00372431	FALSE
MPI	-0.195341	-0.151836	0.0069959	918	0.00372837	FALSE
NDUFAF6	0.026119	0.00497399	0.00700457	919	0.00373243	FALSE
EDIL3	-0.0161268	-0.0275882	0.00700566	920	0.0037365	FALSE
CELF2	-0.128815	-0.133403	0.00701653	921	0.00374056	FALSE
PSEN1	0.0260334	0.0560307	0.00704179	922	0.00374462	FALSE
MTG1	0.0337327	0.0666941	0.00704614	923	0.00374868	FALSE
FOLR1	0.0356519	-0.0229534	0.00704949	924	0.00375274	FALSE
ZNF557	-0.143079	-0.128784	0.00706004	925	0.0037568	FALSE
PRPSAP2	-0.0992082	-0.0962509	0.00706933	926	0.00376086	FALSE
COL4A3BP	-0.0416359	-0.0558935	0.00707012	927	0.00376493	FALSE
ABCE1	-0.141322	-0.125187	0.00709233	928	0.00376899	FALSE
DYSF	0.0586255	0.0632194	0.00711336	929	0.00377305	FALSE
CPNE3	-0.0307372	-0.0515686	0.00712698	930	0.00377711	FALSE
GPD2	0.0935039	0.115228	0.00714552	931	0.00378117	FALSE
EMC6	0.0729348	0.041641	0.00715456	932	0.00378523	FALSE
SLC33A1	0.0859663	0.0815002	0.00716467	933	0.00378929	FALSE
ATXN10	-0.0705669	-0.0944609	0.00717849	934	0.00379336	FALSE
NPC1	0.105734	0.0797775	0.00720812	935	0.00379742	FALSE
GALNT2	0.144939	0.119033	0.00721067	936	0.00380148	FALSE
C15orf52	0.120256	0.0604007	0.00721222	937	0.00380554	FALSE
SEPHS2	-0.138933	-0.0966764	0.00722684	938	0.0038096	FALSE
FLNC	0.0611848	0.0549555	0.00723	939	0.00381366	FALSE
COPS3	-0.0497809	-0.066543	0.00723814	940	0.00381772	FALSE
NUBP2	-0.176209	-0.137379	0.00730826	941	0.00382178	FALSE
STK11	-0.00283234	-0.0256805	0.00731152	942	0.00382585	FALSE
TRAPPC6A	-0.0775531	-0.0213144	0.00734646	943	0.00382991	FALSE
C10orf35	0.00100575	0.0471885	0.00735194	944	0.00383397	FALSE
PSMC1	-0.0333128	-0.0995204	0.00735843	945	0.00383803	FALSE
PSMG2	-0.120508	-0.0710029	0.00737591	946	0.00384209	FALSE
REPS1	-0.122654	-0.150274	0.007383	947	0.00384615	FALSE
REEP3	0.0602577	0.0334901	0.0073946	948	0.00385022	FALSE
RNF220	-0.128835	-0.0960621	0.00739807	949	0.00385428	FALSE
LZTS3	-0.0532984	-0.00741721	0.00745404	950	0.00385834	FALSE
HN1L	-0.12451	-0.140837	0.00748837	951	0.0038624	FALSE
PTGS2	0.0574511	0.0770906	0.00749953	952	0.00386646	FALSE
TPI1	-0.143263	-0.0972069	0.0075057	953	0.00387052	FALSE
RTCA	-0.0109446	-0.0137074	0.00751067	954	0.00387458	FALSE
INPP5D	-0.102522	-0.0962284	0.00754763	955	0.00387865	FALSE
CAMKK2	-0.0709983	-0.0777287	0.00755639	956	0.00388271	FALSE
C5orf24	-0.113563	-0.145921	0.0075689	957	0.00388677	FALSE
IGLL1	-0.0216559	0.0637819	0.00760017	958	0.00389083	FALSE
ATL3	0.0461069	0.0862312	0.0076183	959	0.00389489	FALSE
PVRL1	0.0496519	0.0870218	0.00761994	960	0.00389895	FALSE
PAX2	0.0768408	0.128402	0.00763975	961	0.00390301	FALSE
MAP2K2	-0.0713684	-0.0418923	0.00766305	962	0.00390708	FALSE
SNX33	0.0643683	0.058166	0.00767201	963	0.00391114	FALSE
SLC26A11	0.0932972	0.0858025	0.00769608	964	0.0039152	FALSE
KPNA3	-0.0740924	-0.1228	0.00770045	965	0.00391926	FALSE
IGFBP5	-0.0102878	-0.0236394	0.00771658	966	0.00392332	FALSE
MARS2	-0.00209458	-0.0313481	0.00771958	967	0.00392738	FALSE
UBQLN1.1	0.0128364	0.11395	0.00773365	968	0.00393144	FALSE
NKTR	0.065411	0.0882039	0.00777694	969	0.0039355	FALSE
RALY	0.0894706	0.0639288	0.00778612	970	0.00393957	FALSE
SYNJ2	0.131437	0.103763	0.00782523	971	0.00394363	FALSE
ARL6IP1	-0.00313515	-0.00856247	0.00783188	972	0.00394769	FALSE
WDR83	0.0927793	0.0882884	0.00788637	973	0.00395175	FALSE
PHPT1	-0.152787	-0.168834	0.00788745	974	0.00395581	FALSE
ACOT8	0.193379	0.148403	0.00792315	975	0.00395987	FALSE
TRUB1	-0.202662	-0.180406	0.00795925	976	0.00396394	FALSE
ARHGAP39	0.0560449	0.0548578	0.0079654	977	0.003968	FALSE
STT3A	0.119866	0.0942387	0.00797924	978	0.00397206	FALSE
PSMC3IP	-0.0590335	-0.0492824	0.00799646	979	0.00397612	FALSE
AFAP1L2	0.170568	0.16379	0.00799911	980	0.00398018	FALSE
UBE2D4	-0.100947	-0.108974	0.00800008	981	0.00398424	FALSE
PIN1	-0.0770347	-0.058482	0.0080186	982	0.0039883	FALSE
CDPF1	-0.124055	-0.150671	0.00801961	983	0.00399237	FALSE
RPLP0	-0.145194	-0.17847	0.00803495	984	0.00399643	FALSE
HMGB1	-0.109776	-0.100277	0.0080433	985	0.00400049	FALSE
SLBP	-0.208927	-0.159391	0.00804941	986	0.00400455	FALSE
PML.2	0.106831	0.0864575	0.00805597	987	0.00400861	FALSE
TAB1	-0.0886037	-0.0702954	0.00808364	988	0.00401267	FALSE
C16orf58	0.100582	0.0716389	0.00809107	989	0.00401673	FALSE
R3HDM4	0.00797701	-0.0664659	0.00809142	990	0.00402079	FALSE
HINT1	-0.186472	-0.11946	0.00809631	991	0.00402486	FALSE
TGFBI	0.0892661	0.0995462	0.00809969	992	0.00402892	FALSE
CCT8	-0.196	-0.150793	0.00810136	993	0.00403298	FALSE
NDUFS4	-0.0735205	-0.0946563	0.00811741	994	0.00403704	FALSE
FNDC3B	0.0612116	0.0596074	0.00813704	995	0.0040411	FALSE
IST1	-0.0461595	-0.0646577	0.00814587	996	0.00404516	FALSE
GRIP1	-0.0235511	0.0171679	0.00818174	997	0.00404922	FALSE
IPO11	-0.111623	-0.11856	0.00818625	998	0.00405329	FALSE
MTMR9	-0.104851	-0.0720856	0.00819936	999	0.00405735	FALSE
SNX25	-0.0691338	-0.0526244	0.00820702	1000	0.00406141	FALSE
FBXO30	-0.139076	-0.0638373	0.00821809	1001	0.00406547	FALSE
RPL31	-0.0347124	-0.0319757	0.00823171	1002	0.00406953	FALSE
NMES1	0.118605	0.0615105	0.00823237	1003	0.00407359	FALSE
EVPL	-0.0193216	0.0069694	0.00827996	1004	0.00407765	FALSE
DAAM1	0.104822	0.0811157	0.00828761	1005	0.00408172	FALSE
LTN1	-0.0104902	0.00538468	0.00829202	1006	0.00408578	FALSE
BLOC1S5	-0.15539	-0.120088	0.00832004	1007	0.00408984	FALSE
LGALS1	0.105022	0.10376	0.00835898	1008	0.0040939	FALSE
TUBG2	-0.0329677	-0.0209752	0.00836231	1009	0.00409796	FALSE
SH3RF2	0.0243195	0.0313167	0.00837615	1010	0.00410202	FALSE
TBC1D4	-0.131634	-0.162068	0.00837757	1011	0.00410608	FALSE
GAK	-0.123934	-0.122538	0.00838203	1012	0.00411014	FALSE
CLIP1.1	0.0322886	0.0407323	0.00838471	1013	0.00411421	FALSE
SPATA5	-0.145823	-0.133196	0.00839765	1014	0.00411827	FALSE
DDX46	0.0649128	0.0360934	0.00842658	1015	0.00412233	FALSE
STC2	0.125542	0.0743628	0.00843934	1016	0.00412639	FALSE
HSPA8	-0.0423295	-0.0511775	0.00850075	1017	0.00413045	FALSE
PPOX	0.117106	0.150424	0.00850288	1018	0.00413451	FALSE
DNAJB6	0.0791306	0.0644872	0.00857248	1019	0.00413858	FALSE
CGGBP1	-0.101537	-0.0973467	0.00857441	1020	0.00414264	FALSE
PID1	0.0642766	0.086646	0.00859721	1021	0.0041467	FALSE
ABCC10	0.0693865	-0.0120955	0.0086233	1022	0.00415076	FALSE
UBQLN2	-0.11015	-0.109767	0.00863845	1023	0.00415482	FALSE
TMEM131	0.0846679	0.131324	0.00865024	1024	0.00415888	FALSE
PEAK1	0.124854	0.150563	0.00866544	1025	0.00416294	FALSE
PGAM1	-0.154111	-0.111401	0.00866948	1026	0.004167	FALSE
DFFB	0.024623	0.00331895	0.00867983	1027	0.00417107	FALSE
WWTR1	0.0272278	0.0520875	0.00869274	1028	0.00417513	FALSE
LEPROT	0.000641275	0.00742955	0.00869918	1029	0.00417919	FALSE
E2F4	-0.107662	-0.149379	0.00870577	1030	0.00418325	FALSE
HARS2	0.0224729	0.0100504	0.00872712	1031	0.00418731	FALSE
MZT2A	-0.0813877	-0.0625024	0.00876404	1032	0.00419137	FALSE
CYP4F11	-0.0472954	0.00718057	0.00887774	1033	0.00419543	FALSE
HAUS2	-0.0577368	-0.0543233	0.00888693	1034	0.0041995	FALSE
PDS5B	0.0856834	0.0913098	0.00892316	1035	0.00420356	FALSE
PPM1D	-0.0190088	-0.00673108	0.00892724	1036	0.00420762	FALSE
CTNNBL1	0.108777	0.0535577	0.00892788	1037	0.00421168	FALSE
ENSA	-0.138902	-0.100113	0.00893705	1038	0.00421574	FALSE
TNS3	0.0235142	0.0524965	0.00896219	1039	0.0042198	FALSE
PTPN11	-0.100712	-0.0880065	0.00900384	1040	0.00422387	FALSE
TXNDC17	-0.146361	-0.127265	0.00901382	1041	0.00422793	FALSE
CFL2	0.0540792	0.0602531	0.00904041	1042	0.00423199	FALSE
PSIP1	-0.0845444	-0.120058	0.00904838	1043	0.00423605	FALSE
GDAP1	0.0959217	0.0470209	0.00909628	1044	0.00424011	FALSE
ATP8A1	-0.0933146	-0.10298	0.00911007	1045	0.00424417	FALSE
CSK	-0.0826275	-0.0657006	0.00911988	1046	0.00424823	FALSE
LRRC58	0.0579261	0.14113	0.0091401	1047	0.00425229	FALSE
SEMA3F	-0.0334961	-0.0316035	0.00914032	1048	0.00425636	FALSE
ELMSAN1	0.00985398	0.074005	0.00915543	1049	0.00426042	FALSE
SOGA3	0.119974	0.104024	0.0091729	1050	0.00426448	FALSE
CASP6	-0.176535	-0.161109	0.00918134	1051	0.00426854	FALSE
NSMAF	-0.0446046	-0.0399036	0.00919957	1052	0.0042726	FALSE
CD9	0.0337566	0.0339985	0.00921218	1053	0.00427666	FALSE
HTRA2	0.106967	0.0484434	0.00921338	1054	0.00428072	FALSE
ENY2	-0.116948	-0.120174	0.00923307	1055	0.00428479	FALSE
BNIP1	0.010803	0.0616206	0.00925998	1056	0.00428885	FALSE
PFKFB4	-0.0487012	-0.0999274	0.00926894	1057	0.00429291	FALSE
PUM2	0.0221894	0.0218475	0.00931755	1058	0.00429697	FALSE
RDH10	0.0548784	0.0123413	0.00933048	1059	0.00430103	FALSE
GOLGA4	0.0345763	0.0364007	0.00934312	1060	0.00430509	FALSE
CAMSAP1	-0.183941	-0.12582	0.00935891	1061	0.00430915	FALSE
LSM1	-0.138048	-0.105108	0.00939182	1062	0.00431322	FALSE
LTV1	-0.0973431	-0.0986162	0.00942021	1063	0.00431728	FALSE
RAI14	0.105238	0.0377785	0.00948796	1064	0.00432134	FALSE
DLG1	0.0244879	0.0260372	0.00952623	1065	0.0043254	FALSE
RABGGTB	-0.113828	-0.107515	0.00953174	1066	0.00432946	FALSE
SEC22A	0.124448	0.126144	0.00953459	1067	0.00433352	FALSE
CD79A	0.0597781	0.0432391	0.00957633	1068	0.00433758	FALSE
RABL3	0.125317	0.0614932	0.0095957	1069	0.00434165	FALSE
AAR2	0.0680279	0.0913217	0.0096068	1070	0.00434571	FALSE
ITGA9	0.0246165	0.0101495	0.00962943	1071	0.00434977	FALSE
RACGAP1	0.126418	0.109818	0.00962964	1072	0.00435383	FALSE
CBL	-0.0548172	-0.0576375	0.00963094	1073	0.00435789	FALSE
XPO4	-0.0913626	-0.0971416	0.00969378	1074	0.00436195	FALSE
ZNF397	-0.11664	-0.0302996	0.00971089	1075	0.00436601	FALSE
SMAD2	-0.114476	-0.0952515	0.00971231	1076	0.00437008	FALSE
TXLNG	-0.0487522	-0.0556682	0.0097346	1077	0.00437414	FALSE
GPC1	0.0140291	0.0137035	0.00974283	1078	0.0043782	FALSE
ZNF668	-0.0275733	-0.0590786	0.00976075	1079	0.00438226	FALSE
GULP1	-0.0176779	-0.0139855	0.00979044	1080	0.00438632	FALSE
ACAT2	-0.107423	-0.0573818	0.00982846	1081	0.00439038	FALSE
RDX	0.000204203	0.00445787	0.00985968	1082	0.00439444	FALSE
PRRT3	-0.0702283	-0.0747482	0.00994106	1083	0.0043985	FALSE
ERICH1	-0.0517966	-0.134165	0.00997392	1084	0.00440257	FALSE
FAM133B	-0.170843	-0.187972	0.0100403	1085	0.00440663	FALSE
VCP	0.0379274	0.0121148	0.0100419	1086	0.00441069	FALSE
VGLL4	-0.0444948	-0.00704452	0.010048	1087	0.00441475	FALSE
PSMB7	-0.147363	-0.132015	0.0100521	1088	0.00441881	FALSE
HPCA	0.148452	0.0825553	0.0100555	1089	0.00442287	FALSE
AGRN	0.0835893	0.0769002	0.0100589	1090	0.00442693	FALSE
SLC11A2	0.0362372	-0.007279	0.0100688	1091	0.004431	FALSE
LYPLA2	-0.129863	-0.106997	0.0100974	1092	0.00443506	FALSE
ASNS	-0.144837	-0.121188	0.0101016	1093	0.00443912	FALSE
HMGN5	-0.167483	-0.231749	0.0101412	1094	0.00444318	FALSE
SMAD3	-0.000891104	0.0218908	0.0101564	1095	0.00444724	FALSE
FAM117B	-0.0410649	-0.000846022	0.0101871	1096	0.0044513	FALSE
SLC5A6	-0.0403389	-0.0386314	0.0101872	1097	0.00445537	FALSE
LYRM4	0.0670328	0.0401096	0.0102061	1098	0.00445943	FALSE
NDUFAF2	-0.0170625	-0.0624586	0.0102098	1099	0.00446349	FALSE
PIGS	0.104539	0.100893	0.0102228	1100	0.00446755	FALSE
CYB5R1	0.136505	0.13731	0.0103087	1101	0.00447161	FALSE
CDC37	-0.122833	-0.146939	0.0103258	1102	0.00447567	FALSE
CTNNA1	0.0627105	0.0742702	0.0103279	1103	0.00447973	FALSE
ENPP1	-0.0152113	-0.0473508	0.0103343	1104	0.00448379	FALSE
GBA	0.0630767	0.0657415	0.0103383	1105	0.00448786	FALSE
YARS	-0.132435	-0.0801795	0.0103396	1106	0.00449192	FALSE
AHSA1	-0.104471	-0.128745	0.010398	1107	0.00449598	FALSE
RPS25	-0.0724666	-0.0404835	0.0104434	1108	0.00450004	FALSE
ORC3.1	0.103609	0.143127	0.0104551	1109	0.0045041	FALSE
SEC11C	-0.121659	-0.183565	0.0104616	1110	0.00450816	FALSE
PIP5K1C	-0.125714	-0.150015	0.0104806	1111	0.00451222	FALSE
RPS12	-0.0569171	-0.0873958	0.0105649	1112	0.00451629	FALSE
CERS2	0.0362068	0.0500506	0.0105742	1113	0.00452035	FALSE
ZNF185.1	0.0413839	0.0794063	0.0106013	1114	0.00452441	FALSE
EPB41L1.1	-0.00980054	0.0214772	0.0106529	1115	0.00452847	FALSE
TUBG1	-0.115794	-0.114954	0.0106595	1116	0.00453253	FALSE
SPRYD4	0.0784856	0.0120244	0.0106615	1117	0.00453659	FALSE
CD84	0.121915	0.101578	0.0106779	1118	0.00454066	FALSE
HTATSF1	0.0446312	0.0158444	0.010784	1119	0.00454472	FALSE
ITGAV	0.0304206	0.0198423	0.0107884	1120	0.00454878	FALSE
ELP4	-0.0609194	-0.0437962	0.0107887	1121	0.00455284	FALSE
GSTCD	-0.140557	-0.196338	0.0108149	1122	0.0045569	FALSE
METTL21A	-0.004616	0.000332169	0.0108211	1123	0.00456096	FALSE
TAF13	0.0222026	-0.0307716	0.010826	1124	0.00456502	FALSE
PGP	-0.13737	-0.108922	0.0108272	1125	0.00456908	FALSE
COA1	0.0421627	0.0594112	0.0108359	1126	0.00457315	FALSE
RPLP1	-0.00288192	-0.00290601	0.0108375	1127	0.00457721	FALSE
RPS28	-0.0922055	-0.0914088	0.0108627	1128	0.00458127	FALSE
CLDN4	-0.117002	-0.0783999	0.0108709	1129	0.00458533	FALSE
RICTOR	0.0863153	0.0605469	0.0108737	1130	0.00458939	FALSE
SLC41A3	0.00414666	0.0259013	0.0109066	1131	0.00459345	FALSE
OBSL1	-0.0216764	-0.0164952	0.0109071	1132	0.00459751	FALSE
RNF181	-0.0123087	-0.0639134	0.0109228	1133	0.00460158	FALSE
MOB2	-0.194541	-0.163632	0.0109539	1134	0.00460564	FALSE
CEP164	0.0606812	0.0407552	0.0110395	1135	0.0046097	FALSE
HPCAL1	0.0655116	0.0334477	0.0110522	1136	0.00461376	FALSE
RPS29	-0.12833	-0.0985807	0.0111377	1137	0.00461782	FALSE
PNMA1	0.116374	0.0981536	0.0111582	1138	0.00462188	FALSE
PSPC1	-0.0733431	-0.10717	0.0111792	1139	0.00462594	FALSE
ARFRP1	0.0992712	0.0947732	0.0112512	1140	0.00463001	FALSE
ZNF568	0.0375598	0.0585908	0.0112816	1141	0.00463407	FALSE
GTF2F2	-0.0536524	-0.106395	0.0113119	1142	0.00463813	FALSE
DCUN1D5	-0.17185	-0.167885	0.0113338	1143	0.00464219	FALSE
POLD4	0.113371	0.160846	0.0113476	1144	0.00464625	FALSE
CYHR1	0.0482831	0.0460314	0.0113569	1145	0.00465031	FALSE
DCAF6	0.0811716	0.0584578	0.0113696	1146	0.00465437	FALSE
OPTN	0.0228287	0.0364529	0.0113769	1147	0.00465844	FALSE
KATNB1	-0.146963	-0.126108	0.0114265	1148	0.0046625	FALSE
BMP2K	-0.142267	-0.153267	0.0114278	1149	0.00466656	FALSE
PNPO	-0.074275	-0.105699	0.0114328	1150	0.00467062	FALSE
MET	-0.0195675	-0.020417	0.0114365	1151	0.00467468	FALSE
MEMO1	-0.0861302	-0.0636911	0.0114407	1152	0.00467874	FALSE
ARL1	0.0762938	0.0782468	0.0114474	1153	0.0046828	FALSE
CAMK1	-0.08546	-0.0524679	0.011463	1154	0.00468687	FALSE
PTPN6	-0.0794359	-0.111861	0.0114805	1155	0.00469093	FALSE
RAN	-0.111834	-0.120569	0.0114921	1156	0.00469499	FALSE
GRN	0.157613	0.104619	0.0115315	1157	0.00469905	FALSE
NPC2	0.0801841	0.0754661	0.011538	1158	0.00470311	FALSE
WFS1	0.0726109	0.0333774	0.0115444	1159	0.00470717	FALSE
RAD23B	-0.113752	-0.0490905	0.0115612	1160	0.00471123	FALSE
FAM118B	-0.0525642	-0.0856883	0.0115723	1161	0.0047153	FALSE
ZNF480	0.0789524	0.109034	0.011623	1162	0.00471936	FALSE
TP63	0.0138219	-0.016155	0.0116489	1163	0.00472342	FALSE
NQO2	-0.090631	-0.0639145	0.0116518	1164	0.00472748	FALSE
ZNF8	-0.0792484	-0.0895968	0.0116769	1165	0.00473154	FALSE
MTAP	-0.082576	-0.101929	0.0116776	1166	0.0047356	FALSE
PIKFYVE	-0.0188551	-0.0373402	0.011679	1167	0.00473966	FALSE
PDP1	0.149769	0.119532	0.0117053	1168	0.00474372	FALSE
NDUFAF4	-0.0214036	-0.0740045	0.011709	1169	0.00474779	FALSE
PRDX2	-0.18367	-0.129238	0.0117336	1170	0.00475185	FALSE
DNM2	-0.0754713	-0.0695043	0.0117347	1171	0.00475591	FALSE
CADPS	-0.0752536	-0.0158744	0.0117908	1172	0.00475997	FALSE
MFSD6	0.0456956	0.0346526	0.0118023	1173	0.00476403	FALSE
WNT5A	0.150087	0.148111	0.0118512	1174	0.00476809	FALSE
RMDN2	0.04347	0.0229919	0.0118978	1175	0.00477216	FALSE
ZFP3	-0.00176595	0.0438092	0.0119168	1176	0.00477622	FALSE
IKZF5	-0.0226757	0.0252053	0.011999	1177	0.00478028	FALSE
MOB1B	-0.0836453	-0.0606759	0.0120027	1178	0.00478434	FALSE
PURG	-0.0145123	-0.00544157	0.0120063	1179	0.0047884	FALSE
ODR4	0.0713865	0.0322375	0.0120318	1180	0.00479246	FALSE
MT.ATP6	-0.128392	-0.153114	0.0120606	1181	0.00479652	FALSE
NADK	-0.0292781	-0.0353999	0.0120659	1182	0.00480058	FALSE
PDZD11	-0.00116759	0.0323004	0.0120755	1183	0.00480465	FALSE
GTF2F1	-0.0655921	-0.0660346	0.0120839	1184	0.00480871	FALSE
MASP2	0.0573706	0.0842767	0.0120916	1185	0.00481277	FALSE
ARHGEF6	-0.151085	-0.101084	0.0120995	1186	0.00481683	FALSE
TMEM87A	0.0134121	0.0339317	0.0121007	1187	0.00482089	FALSE
RPS4X	-0.16663	-0.142612	0.0121144	1188	0.00482495	FALSE
KTN1	0.115418	0.081184	0.0121252	1189	0.00482901	FALSE
LSM4	-0.0351416	-0.0300602	0.0121912	1190	0.00483308	FALSE
SENP6	-0.0935512	-0.0747981	0.0122075	1191	0.00483714	FALSE
BTAF1	-0.114554	-0.0688992	0.0122256	1192	0.0048412	FALSE
CLDN6	0.00241721	0.0592862	0.0122303	1193	0.00484526	FALSE
SCAP	0.0602438	0.049	0.012252	1194	0.00484932	FALSE
ALDH3A1	0.050235	0.0914835	0.0122529	1195	0.00485338	FALSE
ST5	0.0656678	0.0825935	0.0122638	1196	0.00485745	FALSE
POLR1D.1	-0.147344	-0.164651	0.0122647	1197	0.00486151	FALSE
FAM184B	-0.0336557	0.021081	0.0122739	1198	0.00486557	FALSE
PRELID1	-0.0176384	-0.019667	0.0123125	1199	0.00486963	FALSE
MPP5	0.029092	0.0367851	0.0123444	1200	0.00487369	FALSE
MAPRE2	-0.111462	-0.0713441	0.0123778	1201	0.00487775	FALSE
BRMS1L	0.0909969	0.138156	0.0123902	1202	0.00488181	FALSE
DNAJB12	0.107578	0.148626	0.0124198	1203	0.00488587	FALSE
HS6ST1	0.1828	0.196213	0.0124292	1204	0.00488994	FALSE
NUDT4	-0.152144	-0.103314	0.0124302	1205	0.004894	FALSE
ALDH1A3	0.0331436	0.0774949	0.0124406	1206	0.00489806	FALSE
C2orf69	-0.0427937	-0.115923	0.0124501	1207	0.00490212	FALSE
GPBP1L1	-0.0929657	-0.0646111	0.0124668	1208	0.00490618	FALSE
ZNF414	0.00230968	0.00225519	0.0124932	1209	0.00491024	FALSE
MSLN	-0.0411788	-0.0429205	0.0124966	1210	0.0049143	FALSE
ASH1L	-0.025425	-0.00277345	0.0124993	1211	0.00491837	FALSE
LSM7	-0.0796971	-0.0903272	0.0124993	1212	0.00492243	FALSE
RXRA	0.0856762	0.0794797	0.0125068	1213	0.00492649	FALSE
DNAJC5	0.229681	0.153802	0.0125265	1214	0.00493055	FALSE
PDCD5	-0.0347678	-0.0618303	0.0125624	1215	0.00493461	FALSE
RIPK2	-0.047526	-0.0548478	0.0125695	1216	0.00493867	FALSE
ING5	-0.168591	-0.13637	0.0125809	1217	0.00494273	FALSE
ANP32A	-0.0735609	-0.0877459	0.0126524	1218	0.0049468	FALSE
CRYL1	-0.10682	-0.117617	0.0126763	1219	0.00495086	FALSE
CARD10	0.0595456	0.0241041	0.012701	1220	0.00495492	FALSE
RABEPK	-0.162352	-0.114031	0.0127123	1221	0.00495898	FALSE
RND3	0.02095	0.00235585	0.0127182	1222	0.00496304	FALSE
ATL2	0.107804	0.113428	0.0127296	1223	0.0049671	FALSE
NUBP1	-0.11901	-0.0941227	0.0128038	1224	0.00497116	FALSE
NFX1	-0.0756863	-0.0710124	0.0128068	1225	0.00497522	FALSE
NMRAL1	-0.158617	-0.151263	0.0128126	1226	0.00497929	FALSE
SOX3	-0.0679677	-0.0305467	0.012814	1227	0.00498335	FALSE
MUC2	-0.0213767	-0.0519333	0.0128159	1228	0.00498741	FALSE
ENO1	-0.101285	-0.0825508	0.0128422	1229	0.00499147	FALSE
COPZ2	0.106018	0.0865387	0.0128432	1230	0.00499553	FALSE
PPP2CA	-0.112678	-0.0550773	0.0128593	1231	0.00499959	FALSE
BOD1	0.0235028	0.0381306	0.0128932	1232	0.00500366	FALSE
CDS1	-0.0120531	-0.022832	0.0129368	1233	0.00500772	FALSE
LAMB3	0.0753206	0.0987855	0.0129883	1234	0.00501178	FALSE
SP100.1	-0.0529917	-0.0377285	0.0130199	1235	0.00501584	FALSE
FBXO7	-0.16232	-0.159061	0.0130329	1236	0.0050199	FALSE
LZIC	-0.140356	-0.130788	0.0130736	1237	0.00502396	FALSE
SOX4	-0.11721	-0.0796418	0.0130758	1238	0.00502802	FALSE
CXorf38	-0.0774924	-0.122674	0.0130853	1239	0.00503209	FALSE
C1orf210	-0.101001	-0.0773312	0.0131003	1240	0.00503615	FALSE
GMPR2	-0.096351	-0.0970497	0.0131175	1241	0.00504021	FALSE
PCDHB2	-0.0169033	0.000245942	0.0131723	1242	0.00504427	FALSE
SPATA5L1	-0.131205	-0.105534	0.0131875	1243	0.00504833	FALSE
NTMT1	-0.0654861	-0.0578502	0.0131891	1244	0.00505239	FALSE
SNX2	-0.090601	-0.0979653	0.0132105	1245	0.00505645	FALSE
DDX3Y	-0.0985039	-0.114882	0.0132361	1246	0.00506051	FALSE
FAM83H	-0.0217426	-0.000973871	0.0132511	1247	0.00506458	FALSE
FAM174A	-0.030731	0.0338713	0.0132531	1248	0.00506864	FALSE
APH1A	0.0546803	0.0575458	0.0132685	1249	0.0050727	FALSE
ACBD3	0.0819722	0.113681	0.0132949	1250	0.00507676	FALSE
NFE2L2	0.106408	0.154844	0.0133317	1251	0.00508082	FALSE
SMNDC1	-0.120953	-0.122658	0.0133399	1252	0.00508488	FALSE
RPS24	-0.100824	-0.0836126	0.0133493	1253	0.00508895	FALSE
MED26	-0.0902193	-0.07708	0.0134148	1254	0.00509301	FALSE
PBX3	0.00528304	0.0416436	0.0134189	1255	0.00509707	FALSE
CD55	0.0749497	0.0649361	0.0134491	1256	0.00510113	FALSE
ARV1	-0.000368501	0.0334136	0.0134743	1257	0.00510519	FALSE
DSG3	0.0372862	0.0729887	0.0135675	1258	0.00510925	FALSE
VMP1	0.0217687	0.0412632	0.0136064	1259	0.00511331	FALSE
CPNE2	-0.115266	-0.0608806	0.0136094	1260	0.00511738	FALSE
COIL	0.145705	0.1478	0.0136155	1261	0.00512144	FALSE
SEC24C	0.0479357	0.100655	0.0136202	1262	0.0051255	FALSE
GAMT	-0.175468	-0.113895	0.0136302	1263	0.00512956	FALSE
PMS1	-0.0419848	-0.0206328	0.0136497	1264	0.00513362	FALSE
TSPAN18	-0.108616	-0.0682585	0.0136596	1265	0.00513768	FALSE
UTP14A	-0.113084	-0.131264	0.0136902	1266	0.00514174	FALSE
ZER1	0.0525045	0.0761114	0.0137053	1267	0.0051458	FALSE
ANGPTL3	-0.0449861	-0.00682431	0.0137334	1268	0.00514987	FALSE
CAPS	0.154999	0.112026	0.013773	1269	0.00515393	FALSE
IKBKAP	-0.0536574	-0.0465631	0.0137746	1270	0.00515799	FALSE
CLDN1	0.0126062	-0.0205606	0.013788	1271	0.00516205	FALSE
FRMD8	0.0408323	0.108477	0.0138243	1272	0.00516611	FALSE
CD81	-0.0395673	-0.0712631	0.0138307	1273	0.00517017	FALSE
RBBP5	0.0887239	0.0640246	0.0138528	1274	0.00517423	FALSE
AFAP1	0.0179597	-0.00664288	0.0138771	1275	0.0051783	FALSE
PBX1	0.0732479	0.027643	0.0138903	1276	0.00518236	FALSE
PRPS2	-0.102554	-0.110015	0.0138956	1277	0.00518642	FALSE
PHLPP1	0.00355486	0.0233139	0.0139316	1278	0.00519048	FALSE
PARD3.1	0.0940711	0.0458108	0.0139731	1279	0.00519454	FALSE
ACVR2A	0.0387995	0.0963689	0.0140244	1280	0.0051986	FALSE
KLHDC7A	-0.0191491	-0.000935816	0.0140951	1281	0.00520266	FALSE
FARP1	0.0323236	0.0474237	0.0140979	1282	0.00520673	FALSE
SWSAP1	0.0299858	0.0705572	0.0141173	1283	0.00521079	FALSE
SHOC2	-0.0778004	-0.0843649	0.0141197	1284	0.00521485	FALSE
ZBTB7B	0.101218	0.110005	0.01412	1285	0.00521891	FALSE
RPS6KA6	-0.0690289	-0.122603	0.0141949	1286	0.00522297	FALSE
POR	-0.0100392	0.00309569	0.0142383	1287	0.00522703	FALSE
CACYBP	-0.143049	-0.126734	0.0142384	1288	0.00523109	FALSE
DOCK11	-0.0649588	-0.0804804	0.0142392	1289	0.00523516	FALSE
SLC10A7	-0.133607	-0.0996767	0.0142505	1290	0.00523922	FALSE
RPS2	-0.200311	-0.216927	0.0143013	1291	0.00524328	FALSE
RNASEH2B	-0.0655108	-0.0972111	0.0143031	1292	0.00524734	FALSE
CT45A5	-0.00225936	0.00537409	0.0143183	1293	0.0052514	FALSE
TMEM120A	0.00654212	0.0473798	0.0143186	1294	0.00525546	FALSE
PDLIM4	0.144196	0.105392	0.01432	1295	0.00525952	FALSE
COLEC10	-0.0308261	-0.0191467	0.0143402	1296	0.00526359	FALSE
ARSK	0.0155059	0.0510639	0.0143849	1297	0.00526765	FALSE
ITGB1	0.129667	0.114664	0.0143933	1298	0.00527171	FALSE
PI16	0.0424045	0.0447793	0.0144169	1299	0.00527577	FALSE
MED13	0.113453	0.0900733	0.014452	1300	0.00527983	FALSE
ENPP5	-0.000591625	0.0258332	0.0144522	1301	0.00528389	FALSE
AP2A1	0.0555464	0.0371584	0.0144802	1302	0.00528795	FALSE
NIPA2	-0.0295541	-0.0752938	0.0145086	1303	0.00529201	FALSE
TNFRSF1A	0.176517	0.195799	0.0145151	1304	0.00529608	FALSE
ZC3H15	-0.147769	-0.120656	0.0145637	1305	0.00530014	FALSE
ATPIF1	-0.0442723	-0.0996698	0.0145707	1306	0.0053042	FALSE
CNOT6	-0.134254	-0.139895	0.0146295	1307	0.00530826	FALSE
CPT1A	0.100689	0.119544	0.0147062	1308	0.00531232	FALSE
PHAX	-0.0818435	-0.0794805	0.0147126	1309	0.00531638	FALSE
LAMB1	0.0432142	0.0206426	0.0147238	1310	0.00532045	FALSE
UBE2O	-0.0375447	-0.0655673	0.0147297	1311	0.00532451	FALSE
GBP2	0.0365631	0.0123545	0.0147364	1312	0.00532857	FALSE
CD276	-0.0205457	0.0114647	0.0148175	1313	0.00533263	FALSE
BAG3	0.00157306	0.0126381	0.0149594	1314	0.00533669	FALSE
TECR	0.0307182	0.0731271	0.0149677	1315	0.00534075	FALSE
SARS2	0.0711191	0.0487831	0.0149732	1316	0.00534481	FALSE
SLC7A6OS	-0.0162944	-0.0125054	0.0149745	1317	0.00534888	FALSE
PSAP	0.0533682	0.0614591	0.0149758	1318	0.00535294	FALSE
PAK3	-0.0969361	-0.0669882	0.0149808	1319	0.005357	FALSE
UBE2E1	-0.17997	-0.167656	0.0149886	1320	0.00536106	FALSE
PCBP1	-0.0556981	-0.0863965	0.0149922	1321	0.00536512	FALSE
ITPKB	-0.155942	-0.106273	0.0150219	1322	0.00536918	FALSE
FAM120C	0.0273077	0.0405937	0.0150234	1323	0.00537324	FALSE
GRHL3	0.0149223	0.0503265	0.0150392	1324	0.0053773	FALSE
HLA.DPB1	-0.0279216	-0.06317	0.0150474	1325	0.00538137	FALSE
DCAF15	-0.0204204	-0.00509568	0.0150604	1326	0.00538543	FALSE
DENND1C	0.114975	0.126653	0.0150783	1327	0.00538949	FALSE
TMEM164	0.0272338	-0.0113735	0.0151151	1328	0.00539355	FALSE
CTNNAL1	-0.0287076	-0.019016	0.0151286	1329	0.00539761	FALSE
RABEP1	-0.0808035	-0.0948222	0.0151445	1330	0.00540167	FALSE
RNASEH2C	-0.010861	-0.00160861	0.0151461	1331	0.00540574	FALSE
ASPH	0.0527164	0.0637451	0.0151594	1332	0.0054098	FALSE
RAB18	0.00602895	0.0377437	0.0151669	1333	0.00541386	FALSE
PIK3R1	-0.0664832	-0.120989	0.0151672	1334	0.00541792	FALSE
FERMT2	-0.0141048	-0.0259492	0.0151744	1335	0.00542198	FALSE
KIAA1468	-0.00458944	-0.0307983	0.0152038	1336	0.00542604	FALSE
PDCD6	0.141416	0.142894	0.0152195	1337	0.0054301	FALSE
MAVS	0.15451	0.107173	0.0152417	1338	0.00543417	FALSE
GLYR1	0.0342809	0.0664588	0.0152479	1339	0.00543823	FALSE
MARCHF2	-0.00727858	0.0410199	0.0152603	1340	0.00544229	FALSE
UNC119	-0.115104	-0.148478	0.0152925	1341	0.00544635	FALSE
PTPRS	0.0513667	0.0405939	0.0153294	1342	0.00545041	FALSE
ELF1	-0.0724132	-0.0726181	0.0153751	1343	0.00545447	FALSE
BCL9L	0.0801787	0.0917367	0.0153827	1344	0.00545853	FALSE
CA2	-0.141096	-0.0887616	0.0153941	1345	0.00546259	FALSE
MAST4	-0.0732222	-0.130413	0.0154114	1346	0.00546666	FALSE
GFM1	0.0505112	0.0621967	0.0154183	1347	0.00547072	FALSE
DCAF16	-0.0208061	-0.0564096	0.0154283	1348	0.00547478	FALSE
EHHADH	0.0641426	0.0293748	0.0154811	1349	0.00547884	FALSE
C17orf59	-0.10679	-0.0845297	0.0155071	1350	0.0054829	FALSE
LRRC8A	0.0776167	0.109255	0.0155124	1351	0.00548696	FALSE
PEBP1	-0.101995	-0.0858769	0.0155305	1352	0.00549102	FALSE
ARHGAP17.1	0.00502246	-0.030306	0.0155362	1353	0.00549509	FALSE
MZT1	-0.0815327	-0.0580567	0.0155386	1354	0.00549915	FALSE
PLEKHG4B	0.0764956	0.0628872	0.015541	1355	0.00550321	FALSE
RNASEH2A	-0.060182	-0.0566081	0.0155417	1356	0.00550727	FALSE
PTPN7	0.0620087	0.0845836	0.0155479	1357	0.00551133	FALSE
DAB2IP	0.0477098	0.00474758	0.0155722	1358	0.00551539	FALSE
CFDP1	-0.0599299	-0.0388753	0.0155888	1359	0.00551945	FALSE
DVL2	-0.114072	-0.104307	0.0156525	1360	0.00552352	FALSE
TNNC2	-0.00813805	-0.0227024	0.0156612	1361	0.00552758	FALSE
LIMCH1.1	0.00765299	0.00864107	0.0156697	1362	0.00553164	FALSE
PIK3CG	0.12828	0.116541	0.0158377	1363	0.0055357	FALSE
RNF6	0.0548128	0.00324593	0.0159521	1364	0.00553976	FALSE
TMEM67	-0.0255841	0.0343768	0.0159602	1365	0.00554382	FALSE
GNG4	0.0300596	0.0414788	0.0159739	1366	0.00554788	FALSE
RPS20	-0.103905	-0.119631	0.0159925	1367	0.00555194	FALSE
TSC22D4	-0.144443	-0.0740076	0.016011	1368	0.00555601	FALSE
FAM127B	0.0302474	0.0338471	0.0160139	1369	0.00556007	FALSE
CD22	0.0687489	0.139604	0.0160268	1370	0.00556413	FALSE
AGPAT2	0.0050794	-0.0333315	0.016032	1371	0.00556819	FALSE
UBXN1	-0.095869	-0.0377996	0.0160486	1372	0.00557225	FALSE
IQGAP1	0.0538602	0.0992972	0.0160871	1373	0.00557631	FALSE
C6orf211	-0.113661	-0.0912564	0.0160877	1374	0.00558038	FALSE
PI4K2A	0.0300602	0.0506606	0.0161277	1375	0.00558444	FALSE
CHAF1A	-0.143124	-0.13379	0.0161376	1376	0.0055885	FALSE
CCDC50	-0.1227	-0.101859	0.0161611	1377	0.00559256	FALSE
CDH2	0.0520689	0.0563595	0.0161615	1378	0.00559662	FALSE
BBC3	-0.100325	-0.0940898	0.01621	1379	0.00560068	FALSE
EIF2B4.1	0.0267936	-0.055025	0.0162228	1380	0.00560474	FALSE
SNAI1	0.132018	0.131712	0.0162319	1381	0.0056088	FALSE
ZCCHC7	-0.0496766	-0.0291319	0.016248	1382	0.00561287	FALSE
TRAF3IP2	-0.0544909	-0.000876514	0.0162759	1383	0.00561693	FALSE
N6AMT2	0.00493661	-0.016082	0.0162961	1384	0.00562099	FALSE
XPA	-0.0844545	-0.12791	0.0163573	1385	0.00562505	FALSE
HMBOX1	0.0217833	-0.0190758	0.016379	1386	0.00562911	FALSE
RAP2B	0.0991375	0.0861034	0.0163816	1387	0.00563317	FALSE
CCNL2	-0.0342137	-0.0201887	0.0163946	1388	0.00563723	FALSE
RPA3	-0.0638602	-0.0698436	0.0164317	1389	0.0056413	FALSE
TLL1	-0.0600298	-0.0897481	0.0164585	1390	0.00564536	FALSE
ZGPAT	0.0475037	0.0441148	0.0164895	1391	0.00564942	FALSE
KLHL11	-0.0224405	-0.0477258	0.0165045	1392	0.00565348	FALSE
BCL10	-0.103647	-0.0964942	0.0165104	1393	0.00565754	FALSE
PLEKHS1	0.0454681	0.0648488	0.0165159	1394	0.0056616	FALSE
TBC1D12	-0.0155055	0.00572494	0.0165318	1395	0.00566567	FALSE
BHLHE40	0.13201	0.200299	0.0165583	1396	0.00566973	FALSE
EIF4A1	-0.0548976	-0.0984229	0.0165954	1397	0.00567379	FALSE
GABPB1	-0.0833099	-0.107497	0.0166548	1398	0.00567785	FALSE
TRIM56	0.0354584	0.0614302	0.0166725	1399	0.00568191	FALSE
P2RX4	0.0769852	0.115126	0.01669	1400	0.00568597	FALSE
PRMT5	-0.0960129	-0.0807798	0.0167357	1401	0.00569003	FALSE
RBBP8NL	-0.075405	-0.0404958	0.0167627	1402	0.00569409	FALSE
POLI	-0.020361	0.0111792	0.0168406	1403	0.00569816	FALSE
INTS3	0.0643263	0.0408973	0.0168475	1404	0.00570222	FALSE
SEMA4B	0.0838492	0.105823	0.0168478	1405	0.00570628	FALSE
GSK3A	-0.153312	-0.101053	0.0168553	1406	0.00571034	FALSE
GPRC5A	0.0920151	0.109328	0.0168615	1407	0.0057144	FALSE
C12orf57	-0.0980119	-0.113491	0.0168693	1408	0.00571846	FALSE
CDK10	0.0351784	0.0403833	0.0169031	1409	0.00572253	FALSE
RAB15	0.0399145	0.119096	0.0169315	1410	0.00572659	FALSE
ASXL3	0.0546883	0.0977971	0.0169491	1411	0.00573065	FALSE
C15orf57	0.0181771	-0.00709913	0.0169632	1412	0.00573471	FALSE
MDM4	0.0946634	0.140001	0.016972	1413	0.00573877	FALSE
MGA	0.0510651	0.0672995	0.0169933	1414	0.00574283	FALSE
CHD6	0.160334	0.148578	0.0169974	1415	0.00574689	FALSE
PIK3R2	-0.0585264	-0.048089	0.0170076	1416	0.00575095	FALSE
ARL2BP	-0.123228	-0.0792412	0.0170812	1417	0.00575502	FALSE
PPP1CB	0.0375669	0.0363049	0.0171042	1418	0.00575908	FALSE
PIK3C3	-0.110426	-0.0923898	0.0171074	1419	0.00576314	FALSE
ACSS3	0.118796	0.132936	0.0171287	1420	0.0057672	FALSE
AASDHPPT	-0.14336	-0.112146	0.0171362	1421	0.00577126	FALSE
SSB	-0.164807	-0.178661	0.0171807	1422	0.00577532	FALSE
CARD17	0.0885682	0.0739694	0.0172332	1423	0.00577938	FALSE
VGLL1	0.0766974	0.0655479	0.017243	1424	0.00578345	FALSE
SYTL3	0.1633	0.205626	0.0172473	1425	0.00578751	FALSE
STMN2	-0.125394	-0.080199	0.0172538	1426	0.00579157	FALSE
PGLS	-0.0801127	-0.0205023	0.0172831	1427	0.00579563	FALSE
LIMD2	-0.105447	-0.0622876	0.0173661	1428	0.00579969	FALSE
DAPK3	0.111905	0.0956916	0.0173675	1429	0.00580375	FALSE
TGFBR1	0.0619578	0.0690456	0.017401	1430	0.00580781	FALSE
LIMCH1	0.0550237	0.051748	0.0174489	1431	0.00581188	FALSE
DOCK9	0.0700142	0.0497461	0.0174756	1432	0.00581594	FALSE
BLOC1S4	-0.0428158	-0.0492389	0.0174854	1433	0.00582	FALSE
KCNAB2	-0.11313	-0.1438	0.0174906	1434	0.00582406	FALSE
MAP9	0.0968493	0.136738	0.0175164	1435	0.00582812	FALSE
PTGES3	-0.0369431	-0.0187618	0.0175171	1436	0.00583218	FALSE
PITPNM1	0.11095	0.127606	0.0175298	1437	0.00583624	FALSE
WLS	0.0543387	0.0149169	0.0175357	1438	0.0058403	FALSE
RAP2C	0.0811596	0.0675107	0.0175505	1439	0.00584437	FALSE
MTFR1L	-0.0147432	-0.0372092	0.0175524	1440	0.00584843	FALSE
UBN1	-0.119851	-0.131674	0.0175531	1441	0.00585249	FALSE
DHCR7	0.0535067	0.0931323	0.0175613	1442	0.00585655	FALSE
LSM14A	-0.0679313	-0.0672296	0.0176263	1443	0.00586061	FALSE
SLC35F6	0.0660169	0.035881	0.0176717	1444	0.00586467	FALSE
C1orf43	0.066153	0.10972	0.0176839	1445	0.00586873	FALSE
CLPP	-0.0842728	-0.141491	0.0177093	1446	0.0058728	FALSE
FCHO2	0.00657679	-0.0524087	0.0177412	1447	0.00587686	FALSE
FAM129B	0.0360624	0.0267106	0.0177472	1448	0.00588092	FALSE
ARMC6	-0.123723	-0.124219	0.0178701	1449	0.00588498	FALSE
SLITRK5	0.00517235	-0.0143789	0.0178759	1450	0.00588904	FALSE
PIP4K2C	0.0892565	0.0838363	0.0179275	1451	0.0058931	FALSE
AKT2	-0.13581	-0.109413	0.0179355	1452	0.00589717	FALSE
SNX5	-0.0518849	-0.0238132	0.0179363	1453	0.00590123	FALSE
KIAA1598	-0.0112403	0.0450873	0.017958	1454	0.00590529	FALSE
BCL2L1	0.15335	0.133445	0.0179977	1455	0.00590935	FALSE
SOD1	-0.154281	-0.143173	0.0180041	1456	0.00591341	FALSE
CES3	-0.0604958	-0.0980519	0.0180079	1457	0.00591747	FALSE
TAPBPL	0.0787137	0.0757867	0.0180184	1458	0.00592153	FALSE
OASL	0.0270042	0.123374	0.0180213	1459	0.00592559	FALSE
KHNYN	-0.0972993	-0.0551376	0.0180451	1460	0.00592966	FALSE
P4HA2	0.0771158	0.0620555	0.0180571	1461	0.00593372	FALSE
GPX4	-0.121657	-0.128683	0.0180813	1462	0.00593778	FALSE
DEK	0.0965861	0.107414	0.018092	1463	0.00594184	FALSE
CTNNA2	0.0643282	0.074754	0.0181199	1464	0.0059459	FALSE
MYO9B	-0.0487358	-0.063572	0.018129	1465	0.00594996	FALSE
RNGTT	0.00636882	-0.01592	0.0181363	1466	0.00595402	FALSE
MPDZ	0.122918	0.0458397	0.0181386	1467	0.00595809	FALSE
TRIM16	0.0257222	0.0749119	0.0182028	1468	0.00596215	FALSE
POU3F3	0.00909358	-0.00807372	0.0182346	1469	0.00596621	FALSE
PLAA	-0.0054058	0.00187027	0.0182417	1470	0.00597027	FALSE
RPL21	-0.0460449	-0.0309333	0.018272	1471	0.00597433	FALSE
BOLA2	-0.157952	-0.147282	0.0183067	1472	0.00597839	FALSE
RPS27L	-0.0598497	-0.0546811	0.0183158	1473	0.00598246	FALSE
POLR3G	-0.130942	-0.150514	0.0183659	1474	0.00598652	FALSE
SAAL1	-0.104016	-0.14366	0.0184485	1475	0.00599058	FALSE
ATP2C1	0.013867	0.014291	0.018466	1476	0.00599464	FALSE
DPEP1	-0.00413549	-0.043194	0.0184888	1477	0.0059987	FALSE
DCLRE1A	-0.00559907	0.0279692	0.0185359	1478	0.00600276	FALSE
METTL5	-0.0988365	-0.0894634	0.0185659	1479	0.00600682	FALSE
QRICH1	-0.0716541	-0.0759855	0.0185759	1480	0.00601088	FALSE
LARP1B	-0.0665217	-0.120253	0.0186116	1481	0.00601495	FALSE
MBOAT1	-0.101692	-0.096231	0.0186132	1482	0.00601901	FALSE
CLYBL	-0.120164	-0.0946634	0.0186346	1483	0.00602307	FALSE
SPATA33	0.0210441	-0.0146646	0.0186369	1484	0.00602713	FALSE
URI1	-0.00957613	-0.0716014	0.0186551	1485	0.00603119	FALSE
METTL2A	0.0334692	-0.0334286	0.0186725	1486	0.00603525	FALSE
PXDN	0.1503	0.130569	0.018681	1487	0.00603931	FALSE
BASP1	0.0978955	0.0430958	0.0187191	1488	0.00604338	FALSE
RPL22	-0.0369909	-0.0630445	0.018734	1489	0.00604744	FALSE
MAP2K7	-0.112551	-0.149779	0.0188148	1490	0.0060515	FALSE
TMEM134	-0.0344297	0.0412962	0.018847	1491	0.00605556	FALSE
PREP	-0.0169541	-0.0198127	0.0188656	1492	0.00605962	FALSE
WASF1	-0.0847424	-0.0384373	0.0188828	1493	0.00606368	FALSE
GBE1	-0.0550443	-0.0540449	0.0188928	1494	0.00606774	FALSE
KLF10	0.0481317	0.0991781	0.0189049	1495	0.00607181	FALSE
SIX2	0.0725622	0.114051	0.0189059	1496	0.00607587	FALSE
SUDS3	0.0520066	0.0532264	0.0189776	1497	0.00607993	FALSE
GPCPD1	-0.036996	-0.0544205	0.019059	1498	0.00608399	FALSE
SLFN5	0.0769581	0.0604373	0.0190704	1499	0.00608805	FALSE
C9orf142	-0.126994	-0.0787512	0.0190902	1500	0.00609211	FALSE
TBX1	-0.0156769	-0.0188188	0.0191453	1501	0.00609617	FALSE
MANBAL	-0.0568358	-0.0351099	0.019148	1502	0.00610024	FALSE
TMEM184B	0.0141588	0.0310128	0.0191533	1503	0.0061043	FALSE
GPR56	0.0918079	0.099975	0.0191753	1504	0.00610836	FALSE
ACOT4	0.0744711	0.0721929	0.0192306	1505	0.00611242	FALSE
HLA.DPA1	-0.0799785	-0.0726782	0.0192523	1506	0.00611648	FALSE
GLTSCR1L	-0.00321432	-0.0129981	0.0192806	1507	0.00612054	FALSE
SIPA1L3	0.0954626	0.0808212	0.0193071	1508	0.0061246	FALSE
EMC2	0.125338	0.102881	0.0193089	1509	0.00612867	FALSE
RAD21	0.0925132	0.0965566	0.0193097	1510	0.00613273	FALSE
UNK	-0.146823	-0.122253	0.0193694	1511	0.00613679	FALSE
LRRC59	0.0513232	-0.00675826	0.0194119	1512	0.00614085	FALSE
ERBB2	-0.0258569	0.00805558	0.0194212	1513	0.00614491	FALSE
TATDN1	0.0652217	0.0493934	0.0194287	1514	0.00614897	FALSE
ZNF707	-0.0534551	-0.0285589	0.0194591	1515	0.00615303	FALSE
CTTN	0.0163048	0.0247656	0.0194683	1516	0.00615709	FALSE
RPL10	-0.162798	-0.166044	0.0194763	1517	0.00616116	FALSE
GNAO1	0.0455634	0.0828959	0.0194821	1518	0.00616522	FALSE
RPL23A	-0.0790916	-0.0795163	0.0194907	1519	0.00616928	FALSE
SAYSD1	0.00401064	-0.0171785	0.0195669	1520	0.00617334	FALSE
CEACAM6	0.0538501	0.1271	0.0196112	1521	0.0061774	FALSE
FN1	0.0486678	0.0400749	0.0196306	1522	0.00618146	FALSE
BRD3	0.0234877	0.0572458	0.0196661	1523	0.00618552	FALSE
ADSL	-0.154093	-0.147447	0.0196743	1524	0.00618959	FALSE
PPM1A	-0.144211	-0.110137	0.0196868	1525	0.00619365	FALSE
CYB561	0.0557209	0.045126	0.0196895	1526	0.00619771	FALSE
ITCH	0.103953	0.113004	0.0197194	1527	0.00620177	FALSE
TRIM27	0.0467433	0.0481407	0.0197245	1528	0.00620583	FALSE
KLRG2	-0.0856559	-0.0592624	0.0198134	1529	0.00620989	FALSE
PRMT6	0.00239738	-0.0183854	0.0198406	1530	0.00621396	FALSE
IMPDH1	-0.160489	-0.199564	0.0198532	1531	0.00621802	FALSE
KMT2C	0.0981301	0.0875745	0.0198633	1532	0.00622208	FALSE
LMAN2	0.140159	0.0820914	0.0199032	1533	0.00622614	FALSE
NA.6	-0.00321871	-0.00161444	0.0199438	1534	0.0062302	FALSE
CHAC2	-0.109785	-0.114513	0.0199958	1535	0.00623426	FALSE
SERPINB5	0.128038	0.130217	0.0199964	1536	0.00623832	FALSE
EPB41	-0.186425	-0.188022	0.0200232	1537	0.00624238	FALSE
VAMP8	0.0250865	0.04355	0.0200722	1538	0.00624645	FALSE
EXPH5	0.163834	0.126077	0.0200742	1539	0.00625051	FALSE
COA4	-0.0316955	-0.0515379	0.0200765	1540	0.00625457	FALSE
PITPNB	-0.141391	-0.0979915	0.0200773	1541	0.00625863	FALSE
TNC	0.0511289	0.0489424	0.0200881	1542	0.00626269	FALSE
TXNL4B	-0.0177102	-0.057225	0.0201516	1543	0.00626675	FALSE
MALT1	-0.0752424	-0.0543996	0.0202082	1544	0.00627081	FALSE
YPEL5	0.120323	0.12861	0.0202137	1545	0.00627488	FALSE
SDF2	0.0480707	0.0295783	0.0202608	1546	0.00627894	FALSE
DOCK2	-0.0660532	-0.0267616	0.020284	1547	0.006283	FALSE
SAT2	0.00713473	-0.0260894	0.0202899	1548	0.00628706	FALSE
UBE2M	-0.0859067	-0.112122	0.0203633	1549	0.00629112	FALSE
FRY	-0.0247018	0.00736123	0.0203716	1550	0.00629518	FALSE
SLC25A5	0.10838	0.0911617	0.0203745	1551	0.00629925	FALSE
LPHN2	0.0776864	0.0573301	0.0203893	1552	0.00630331	FALSE
DTNBP1	-0.0467002	-0.055339	0.0204028	1553	0.00630737	FALSE
CHUK	-0.0590649	-0.0703486	0.0204796	1554	0.00631143	FALSE
DKK4	0.0326434	0.00791929	0.0205196	1555	0.00631549	FALSE
CALML3	-0.0471695	-0.0856884	0.0206297	1556	0.00631955	FALSE
DNM1L	-0.0848128	-0.0559164	0.0206476	1557	0.00632361	FALSE
RAB3D	0.0349123	0.0406922	0.0206814	1558	0.00632767	FALSE
TACSTD2	0.100855	0.127776	0.0206953	1559	0.00633174	FALSE
KIFC3	0.100924	0.119346	0.020743	1560	0.0063358	FALSE
SCD	0.013133	0.0190882	0.0207803	1561	0.00633986	FALSE
ESRP1	0.0915309	0.147718	0.0208546	1562	0.00634392	FALSE
PPL	0.0444587	0.0700082	0.0208964	1563	0.00634798	FALSE
PITPNM3	0.00953743	-0.00540661	0.0209089	1564	0.00635204	FALSE
PPP2R2D	-0.0823088	-0.052075	0.0209223	1565	0.0063561	FALSE
TEAD1	0.0482829	-0.0586448	0.020924	1566	0.00636017	FALSE
TYMS	-0.074761	-0.0349494	0.0209925	1567	0.00636423	FALSE
ZZEF1	-0.0586646	-0.0604846	0.0210008	1568	0.00636829	FALSE
MLPH	0.0457165	-0.0143206	0.0210115	1569	0.00637235	FALSE
MTPN	-0.130499	-0.0707822	0.021019	1570	0.00637641	FALSE
PMM2	-0.128342	-0.0918501	0.0210348	1571	0.00638047	FALSE
SYCE1	-0.00942287	-0.0249454	0.0210557	1572	0.00638453	FALSE
RAD54L2	0.012763	0.0151305	0.0210679	1573	0.0063886	FALSE
TUBGCP2	-0.101594	-0.0360827	0.0210704	1574	0.00639266	FALSE
RBFA	-0.050106	-0.0314314	0.0211025	1575	0.00639672	FALSE
NUDC	-0.092426	-0.0873329	0.0211607	1576	0.00640078	FALSE
IPO8	-0.059331	-0.0611967	0.0211788	1577	0.00640484	FALSE
BCR	-0.2329	-0.173458	0.0211983	1578	0.0064089	FALSE
RASSF8	0.113921	0.113424	0.0212235	1579	0.00641296	FALSE
RANBP3	-0.0395092	-0.117563	0.0212295	1580	0.00641702	FALSE
NDN	0.0202988	-0.00452141	0.021255	1581	0.00642109	FALSE
MBP	-0.0554884	-0.104319	0.0212576	1582	0.00642515	FALSE
SERBP1.1	-0.0681535	-0.0634096	0.0213089	1583	0.00642921	FALSE
KDELR3	0.0318341	0.0447516	0.0213541	1584	0.00643327	FALSE
LAMC2	0.093159	0.0903175	0.0213645	1585	0.00643733	FALSE
SLC39A11	-0.0260747	-0.00478523	0.0214191	1586	0.00644139	FALSE
APMAP	-0.000670078	-0.0230899	0.0214277	1587	0.00644546	FALSE
TTC38	-0.0398785	-0.0797944	0.0214428	1588	0.00644952	FALSE
MFN2	0.0208226	0.0653697	0.0214461	1589	0.00645358	FALSE
PEG10	0.026233	0.00354254	0.0214465	1590	0.00645764	FALSE
TTF2	-0.0870486	-0.0572274	0.0214687	1591	0.0064617	FALSE
SKI	-0.0440406	-0.0698536	0.0214834	1592	0.00646576	FALSE
PVRL2	0.0620674	0.0515795	0.0214989	1593	0.00646982	FALSE
SCAMP3	0.109494	0.145805	0.0215473	1594	0.00647389	FALSE
FXR1	0.104903	0.130656	0.0215523	1595	0.00647795	FALSE
RABAC1	0.0375566	0.061616	0.0215987	1596	0.00648201	FALSE
C1orf131.1	0.0392309	-0.00356565	0.0216454	1597	0.00648607	FALSE
KIAA0100	0.0956075	0.0709599	0.0216997	1598	0.00649013	FALSE
TLCD1	0.0943849	0.124902	0.021724	1599	0.00649419	FALSE
LRRC47	-0.172567	-0.11036	0.0217429	1600	0.00649825	FALSE
KCTD16	-0.0884494	-0.0992661	0.0217511	1601	0.00650231	FALSE
NEK6	-0.120704	-0.133777	0.0217897	1602	0.00650638	FALSE
GOLIM4	0.0462851	0.0417515	0.0217953	1603	0.00651044	FALSE
ATRIP	0.0895527	0.0867048	0.0218197	1604	0.0065145	FALSE
CEP78	-0.0604796	-0.0457607	0.021828	1605	0.00651856	FALSE
IGFBP4	0.110704	0.069261	0.0218346	1606	0.00652262	FALSE
HID1	-0.0219352	-0.0100854	0.0218512	1607	0.00652668	FALSE
ITGB6	-0.0257954	-0.0198876	0.0218717	1608	0.00653075	FALSE
RPL8	-0.0436854	-0.0482091	0.0219016	1609	0.00653481	FALSE
TRIM36	-0.00185015	0.0159804	0.021944	1610	0.00653887	FALSE
MKL1	-0.0999902	-0.0484984	0.0220109	1611	0.00654293	FALSE
SRA1	-0.0879169	-0.0793843	0.0220267	1612	0.00654699	FALSE
R3HCC1L	0.0965285	0.0577667	0.0220659	1613	0.00655105	FALSE
SMAD5	-0.0804266	-0.122514	0.0220675	1614	0.00655511	FALSE
GGT7	0.0696488	0.0573948	0.0220828	1615	0.00655918	FALSE
PHLDA1	0.0351817	-0.00429026	0.0221319	1616	0.00656324	FALSE
FER1L4	0.0299843	0.000694668	0.0221437	1617	0.0065673	FALSE
ATP6V1F	-0.153254	-0.163452	0.022172	1618	0.00657136	FALSE
PPP1R37	0.00304461	-0.0163147	0.022179	1619	0.00657542	FALSE
PCDHA13	0.139934	0.125971	0.022182	1620	0.00657948	FALSE
DEPDC5	0.0711787	0.0689483	0.022186	1621	0.00658354	FALSE
TMED9	0.0654956	0.0699815	0.0222934	1622	0.0065876	FALSE
ZNF24	-0.101379	-0.0787931	0.0223019	1623	0.00659167	FALSE
TBC1D23	0.0865132	0.0357733	0.0223227	1624	0.00659573	FALSE
PLD3	0.0135936	0.027316	0.0223288	1625	0.00659979	FALSE
MTHFD1	-0.119191	-0.108079	0.0223436	1626	0.00660385	FALSE
ELOVL1	-0.0377966	-0.0356703	0.0223729	1627	0.00660791	FALSE
ZBTB38	-0.0134648	-0.0116236	0.0223973	1628	0.00661197	FALSE
TYRO3	0.0574102	0.0923161	0.0224413	1629	0.00661603	FALSE
RPL36A	-0.140893	-0.114348	0.0224617	1630	0.0066201	FALSE
PNP	-0.0452072	-0.0391666	0.0224794	1631	0.00662416	FALSE
VAPA	0.138308	0.124178	0.022567	1632	0.00662822	FALSE
C5orf45	-0.00313985	0.0178718	0.0225858	1633	0.00663228	FALSE
GINS4	-0.00551588	-0.0362081	0.0225913	1634	0.00663634	FALSE
MBOAT7	0.0656234	0.0364624	0.0226137	1635	0.0066404	FALSE
LSM6	-0.0810218	-0.0838283	0.0226492	1636	0.00664446	FALSE
C14orf142	-0.0535704	-0.00817425	0.0226569	1637	0.00664853	FALSE
SLC16A6	-0.00984996	-0.000773704	0.0227764	1638	0.00665259	FALSE
SIN3A	0.11001	0.10989	0.0228049	1639	0.00665665	FALSE
DUT	-0.153226	-0.0786219	0.0228053	1640	0.00666071	FALSE
FOXO1	0.0779472	0.0517806	0.0228834	1641	0.00666477	FALSE
SRGAP1	0.0895506	0.0207207	0.0230097	1642	0.00666883	FALSE
CCT6A	-0.150492	-0.106567	0.0230219	1643	0.00667289	FALSE
GLUD2	-0.0514238	-0.0169591	0.0230538	1644	0.00667696	FALSE
IMPDH2	-0.0704234	-0.0908143	0.0230704	1645	0.00668102	FALSE
REEP5	0.0776787	0.103476	0.0230802	1646	0.00668508	FALSE
CRADD	-0.0274849	0.0102194	0.023097	1647	0.00668914	FALSE
CPNE1	0.0477501	0.0920313	0.0231037	1648	0.0066932	FALSE
PACS1	0.0935181	0.105693	0.0231071	1649	0.00669726	FALSE
FIS1	0.108911	0.0620158	0.0231497	1650	0.00670132	FALSE
DPEP3	-0.104977	-0.0911921	0.02315	1651	0.00670539	FALSE
PLAT	0.0314706	0.0390767	0.0232216	1652	0.00670945	FALSE
GEMIN5	-0.0523311	-0.0572815	0.0232286	1653	0.00671351	FALSE
SERINC3	0.0461934	0.0466418	0.0232576	1654	0.00671757	FALSE
OLA1	-0.101648	-0.0626999	0.0232646	1655	0.00672163	FALSE
ZFX	-0.150869	-0.149657	0.0232809	1656	0.00672569	FALSE
ATRN	0.105427	0.0426296	0.0233131	1657	0.00672975	FALSE
USP48	-0.0803663	-0.0776981	0.023335	1658	0.00673381	FALSE
SLC46A1	-0.145213	-0.126494	0.0233708	1659	0.00673788	FALSE
TRIO	0.103957	0.0450845	0.0233768	1660	0.00674194	FALSE
CLUH	-0.139448	-0.105189	0.0234039	1661	0.006746	FALSE
IL16	0.0613406	0.0415229	0.0234196	1662	0.00675006	FALSE
C9orf85	0.0114789	-0.0141596	0.0234363	1663	0.00675412	FALSE
NAAA	-0.0560966	-0.019331	0.023476	1664	0.00675818	FALSE
AMPD2	-0.0320187	-0.0470426	0.0234832	1665	0.00676225	FALSE
GTF3C4	0.0517484	0.064026	0.0234847	1666	0.00676631	FALSE
PM20D2	-0.114647	-0.112788	0.0235359	1667	0.00677037	FALSE
TSR2	0.0179017	-0.0181305	0.0236049	1668	0.00677443	FALSE
SYNRG	0.0158383	0.0120412	0.0236145	1669	0.00677849	FALSE
CCDC90B	0.0565449	0.0778355	0.0236377	1670	0.00678255	FALSE
FIP1L1	-0.0869379	-0.114495	0.023643	1671	0.00678661	FALSE
HCLS1	-0.119447	-0.112392	0.0236465	1672	0.00679068	FALSE
PCYOX1	0.0319669	0.022955	0.0236566	1673	0.00679474	FALSE
TXNDC15	0.124673	0.0979524	0.0236901	1674	0.0067988	FALSE
PIGH	0.000165201	-0.0199065	0.0237413	1675	0.00680286	FALSE
SAP30L	0.129193	0.0924602	0.0237664	1676	0.00680692	FALSE
MATK	0.0377506	0.0387427	0.0238378	1677	0.00681098	FALSE
RIOK3	-0.0598747	-0.0958881	0.023843	1678	0.00681504	FALSE
IMMP2L	0.018942	0.00962958	0.02387	1679	0.0068191	FALSE
MAP2K3	-0.0855553	-0.125313	0.0238803	1680	0.00682317	FALSE
CCAR2	-0.107385	-0.162241	0.0238941	1681	0.00682723	FALSE
FLYWCH1	0.00425621	-0.000316088	0.0239997	1682	0.00683129	FALSE
MFSD1	0.0740319	0.0924955	0.024019	1683	0.00683535	FALSE
AP1AR	-0.0610252	-0.0943445	0.0240728	1684	0.00683941	FALSE
HPX	-0.0493827	-0.0601176	0.0240865	1685	0.00684347	FALSE
KLHL12	-0.0408515	-0.0428103	0.0241091	1686	0.00684754	FALSE
VDAC2	0.0547054	0.074715	0.024163	1687	0.0068516	FALSE
DMBT1	0.000435281	0.0267122	0.0241649	1688	0.00685566	FALSE
CYB5R4	-0.0542793	-0.112632	0.0242668	1689	0.00685972	FALSE
FZD6	0.0271595	0.0784481	0.0242909	1690	0.00686378	FALSE
ELAC2	-0.0431561	-0.0644351	0.0243216	1691	0.00686784	FALSE
LANCL2	-0.0566791	0.00955819	0.0243293	1692	0.0068719	FALSE
CREB1	-0.121293	-0.0958003	0.0243397	1693	0.00687597	FALSE
SSBP2	-0.055285	-0.0211959	0.0243874	1694	0.00688003	FALSE
ERGIC1	0.0551388	0.0423613	0.0243909	1695	0.00688409	FALSE
SRP19	-0.00524237	-0.0163097	0.0244712	1696	0.00688815	FALSE
CCT3	-0.144279	-0.0971111	0.0245347	1697	0.00689221	FALSE
LIMA1	0.0725975	0.0378321	0.0245852	1698	0.00689627	FALSE
LRRC8E	-0.0123915	-0.0119264	0.0245866	1699	0.00690033	FALSE
PITX3	0.178474	0.17995	0.0246005	1700	0.00690439	FALSE
GPAM	-0.0323891	-0.0205942	0.0246458	1701	0.00690846	FALSE
LMTK2	0.0898736	0.126402	0.0247088	1702	0.00691252	FALSE
SHC1	0.0202084	0.0249641	0.0247642	1703	0.00691658	FALSE
IP6K2	0.124478	0.145854	0.0247777	1704	0.00692064	FALSE
KLC3	0.00471589	0.0440828	0.0247783	1705	0.0069247	FALSE
HNRNPD.1	-0.0252678	-0.0490403	0.0248469	1706	0.00692876	FALSE
CDS2	0.0232069	0.0225544	0.0248593	1707	0.00693282	FALSE
THSD1	0.0057945	-0.00736677	0.0248893	1708	0.00693689	FALSE
KMT2A	0.127887	0.113396	0.0248942	1709	0.00694095	FALSE
MTCH2	0.0118344	0.0231905	0.0249015	1710	0.00694501	FALSE
DIS3L2	-0.0580521	-0.028295	0.0249181	1711	0.00694907	FALSE
GLRX	-0.0505596	-0.100163	0.0249294	1712	0.00695313	FALSE
NOL3	-0.06721	0.00568552	0.0250944	1713	0.00695719	FALSE
WDSUB1	-0.13306	-0.129513	0.0251054	1714	0.00696125	FALSE
TSTD1	0.01279	0.0213008	0.0251522	1715	0.00696532	FALSE
SMURF2	0.0628679	0.0524706	0.0251609	1716	0.00696938	FALSE
GXYLT2	0.0500133	0.0574175	0.0251949	1717	0.00697344	FALSE
PROM2	-0.0545795	-0.0765106	0.0252068	1718	0.0069775	FALSE
ACTN1.1	-0.0343657	-0.0424771	0.0252086	1719	0.00698156	FALSE
PGPEP1	-0.0494629	-0.0514247	0.0252654	1720	0.00698562	FALSE
MPHOSPH6	-0.0340149	-0.0960613	0.0252671	1721	0.00698968	FALSE
ADAT3	0.0365077	0.0388432	0.0252838	1722	0.00699374	FALSE
BMP5	-0.0668367	-0.0281675	0.0253402	1723	0.00699781	FALSE
LARS2	-0.157982	-0.177922	0.0253859	1724	0.00700187	FALSE
PTPRA	0.0361833	0.0712377	0.0254022	1725	0.00700593	FALSE
PPA1	-0.0839853	-0.0982996	0.0254904	1726	0.00700999	FALSE
PPAP2B	0.0409496	0.0242263	0.0255329	1727	0.00701405	FALSE
CMPK2	-0.0769926	-0.0325099	0.0255598	1728	0.00701811	FALSE
FAM169A	-0.0950925	-0.0892999	0.025589	1729	0.00702218	FALSE
LMBRD2	0.0286358	0.0554922	0.025609	1730	0.00702624	FALSE
ZBED1	-0.0332854	-0.0543513	0.0256868	1731	0.0070303	FALSE
BRPF3	0.0224928	0.0512216	0.0256894	1732	0.00703436	FALSE
ATP5H	-0.0771279	-0.102932	0.0257143	1733	0.00703842	FALSE
DBI	-0.116446	-0.0942681	0.0257655	1734	0.00704248	FALSE
PROSER1	0.00587339	0.00690559	0.0257855	1735	0.00704654	FALSE
CD99L2	0.123729	0.122359	0.0258278	1736	0.0070506	FALSE
ZNF433	0.0839714	0.101858	0.0258311	1737	0.00705467	FALSE
LRRC20	-0.0780074	-0.078616	0.025838	1738	0.00705873	FALSE
HNRNPD	-0.0952975	-0.110277	0.0258524	1739	0.00706279	FALSE
RGL2	0.0766019	0.0935406	0.0258565	1740	0.00706685	FALSE
MB21D1	-0.012953	-7.64e-05	0.0258702	1741	0.00707091	FALSE
RIOK1	-0.12072	-0.105216	0.0258763	1742	0.00707497	FALSE
C1orf85	0.0926163	0.0956928	0.0258872	1743	0.00707904	FALSE
SYT7	-0.0979277	-0.100767	0.0259078	1744	0.0070831	FALSE
TJP2	0.0523903	0.019244	0.0259223	1745	0.00708716	FALSE
ESRP1.1	0.0621291	0.0926027	0.025924	1746	0.00709122	FALSE
NPEPL1	-0.0820772	-0.0462216	0.0259296	1747	0.00709528	FALSE
BMP10	-0.00539216	-0.0583878	0.0259848	1748	0.00709934	FALSE
MTMR14	-0.0900034	-0.0623045	0.0260081	1749	0.0071034	FALSE
ALPP	0.0313124	0.0180659	0.0261161	1750	0.00710747	FALSE
B3GNT6	-0.0576934	-0.0497819	0.026142	1751	0.00711153	FALSE
ATP6V1H	-0.0866969	-0.0600916	0.0261825	1752	0.00711559	FALSE
COL7A1	0.0166191	0.00244875	0.0261928	1753	0.00711965	FALSE
DNAJB1	-0.0969476	-0.0902393	0.0262255	1754	0.00712371	FALSE
R3HDM1	-0.10195	-0.0632127	0.0262431	1755	0.00712777	FALSE
SLCO4C1	-0.0287544	-0.0153422	0.0262594	1756	0.00713183	FALSE
MECP2	0.0585288	0.0680703	0.0263324	1757	0.00713589	FALSE
FLT3	-0.0550202	-0.103252	0.0263425	1758	0.00713996	FALSE
NARG2	-0.00509069	0.00346179	0.0263921	1759	0.00714402	FALSE
SRP14	-0.158979	-0.122822	0.0265102	1760	0.00714808	FALSE
ENO2	-0.14703	-0.144506	0.0265459	1761	0.00715214	FALSE
DNAJC17	-0.112001	-0.117175	0.0265504	1762	0.0071562	FALSE
CHST14	0.0655578	0.0839218	0.0266655	1763	0.00716026	FALSE
DDHD2	0.00280224	0.0573284	0.0267233	1764	0.00716433	FALSE
CSGALNACT2	0.0802059	0.114347	0.0267449	1765	0.00716839	FALSE
CSPP1	-0.000905435	0.0111596	0.0267661	1766	0.00717245	FALSE
THEM6	0.0254268	0.00810399	0.0267945	1767	0.00717651	FALSE
GAPDH	-0.0786009	-0.0375659	0.0267987	1768	0.00718057	FALSE
TNRC6B	-0.168684	-0.141439	0.0268069	1769	0.00718463	FALSE
QTRTD1	-0.0373281	-0.0234566	0.0268964	1770	0.00718869	FALSE
BGN	0.0321032	0.0677493	0.0269206	1771	0.00719275	FALSE
BCL3	0.12362	0.12824	0.0269414	1772	0.00719682	FALSE
CCBL2	-0.0685875	-0.0873347	0.0269605	1773	0.00720088	FALSE
TRMT10A	-0.131696	-0.153624	0.0269615	1774	0.00720494	FALSE
UFM1	0.00335123	-0.0318073	0.0269883	1775	0.007209	FALSE
GOLT1B	0.0491727	0.0138054	0.0271462	1776	0.00721306	FALSE
ELP5	0.00930052	-0.0192983	0.027186	1777	0.00721712	FALSE
RPL4	-0.132668	-0.184763	0.0272753	1778	0.00722118	FALSE
DLGAP2	0.00648969	-0.0107601	0.0272891	1779	0.00722525	FALSE
CCDC174	-0.029397	-0.0183193	0.0272926	1780	0.00722931	FALSE
TMOD1	-0.000107514	0.0352181	0.0272945	1781	0.00723337	FALSE
AK6	-0.0649163	-0.0722485	0.0272964	1782	0.00723743	FALSE
CCT2	-0.0949947	-0.118517	0.0273085	1783	0.00724149	FALSE
MAGEA2	-0.00915177	0.0390441	0.0273164	1784	0.00724555	FALSE
MBTPS2	-0.0284227	0.0381413	0.0274036	1785	0.00724961	FALSE
HOXB6	-0.0818048	-0.0518255	0.0274289	1786	0.00725368	FALSE
DPH7	-0.0737359	-0.0324902	0.0274916	1787	0.00725774	FALSE
JAG2	0.0204243	0.0707863	0.0275797	1788	0.0072618	FALSE
GNAS	0.120813	0.0371171	0.0275944	1789	0.00726586	FALSE
GOT1	-0.0953921	-0.105123	0.0276084	1790	0.00726992	FALSE
NCF1B	0.10466	0.131635	0.0276307	1791	0.00727398	FALSE
PC	0.0596349	0.0675458	0.0276537	1792	0.00727804	FALSE
ITFG1	0.0992848	0.05955	0.0276639	1793	0.0072821	FALSE
SUSD2	0.00725325	0.0247822	0.0277464	1794	0.00728617	FALSE
NCF4	0.0644795	0.0908744	0.0277493	1795	0.00729023	FALSE
PRKACB.1	0.0195585	-0.000744314	0.0277978	1796	0.00729429	FALSE
BLZF1	0.0447796	0.0487646	0.0278175	1797	0.00729835	FALSE
ploidy	0.644868	0.113747	0.0278394	1798	0.00730241	FALSE
SLC16A2	0.129422	0.0921274	0.0279329	1799	0.00730647	FALSE
C10orf32	-0.193632	-0.175315	0.0279407	1800	0.00731053	FALSE
QDPR	-0.0758185	-0.0846904	0.0279512	1801	0.0073146	FALSE
PUM1	-0.118882	-0.0925002	0.0279841	1802	0.00731866	FALSE
ZNF131	0.0436024	0.0945576	0.0280009	1803	0.00732272	FALSE
CCT4	-0.120464	-0.0935549	0.0280582	1804	0.00732678	FALSE
HRAS	0.136949	0.103197	0.0280907	1805	0.00733084	FALSE
PPIP5K1	-0.127396	-0.120127	0.028134	1806	0.0073349	FALSE
HSD17B1	0.0151668	0.00204521	0.0281713	1807	0.00733897	FALSE
IGHM	-0.13551	-0.120928	0.0281983	1808	0.00734303	FALSE
SRRM2	-0.0578493	-0.0964714	0.0282166	1809	0.00734709	FALSE
CMC4	0.0663393	0.0587891	0.0282188	1810	0.00735115	FALSE
ZNF207	-0.0645988	-0.112212	0.0282266	1811	0.00735521	FALSE
SLC25A12	0.0652082	0.0603507	0.0283699	1812	0.00735927	FALSE
WWP1	0.0290135	0.0656534	0.0283877	1813	0.00736333	FALSE
MDH1	-0.0736407	-0.0481367	0.0284269	1814	0.00736739	FALSE
F11R	0.0014771	0.0413922	0.0284702	1815	0.00737146	FALSE
CS	-0.0148108	0.0166088	0.0284935	1816	0.00737552	FALSE
DOT1L	-0.0742819	-0.0735276	0.0285302	1817	0.00737958	FALSE
MOB3A	-0.000921184	-0.0582361	0.028548	1818	0.00738364	FALSE
TOPBP1	0.0459459	0.0822391	0.0285888	1819	0.0073877	FALSE
SEC22B	0.116779	0.0849213	0.0286015	1820	0.00739176	FALSE
POMT2	-0.0998766	-0.0487979	0.0286612	1821	0.00739582	FALSE
NFATC1	-0.0151458	0.0177034	0.0286637	1822	0.00739989	FALSE
ISYNA1	-0.203718	-0.146226	0.0286763	1823	0.00740395	FALSE
OGFOD1	0.00166678	-0.0536704	0.0286835	1824	0.00740801	FALSE
PVRL2.1	0.0684338	0.0639148	0.0288139	1825	0.00741207	FALSE
NCEH1	0.0612412	-0.0138999	0.0288653	1826	0.00741613	FALSE
MAML1	-0.120192	-0.0928411	0.0289278	1827	0.00742019	FALSE
XRCC6BP1	-0.0494259	-0.0198811	0.0289454	1828	0.00742426	FALSE
CERS4	-0.0358007	-0.0326357	0.0289661	1829	0.00742832	FALSE
ZC3H7B	-0.113464	-0.155362	0.0289904	1830	0.00743238	FALSE
SPECC1	0.156374	0.0998401	0.029072	1831	0.00743644	FALSE
SLC9A3R2.1	0.0334701	0.0135077	0.02908	1832	0.0074405	FALSE
MYO15A	0.00244336	-0.0314735	0.0291129	1833	0.00744456	FALSE
WARS	-0.080634	-0.029199	0.0291566	1834	0.00744862	FALSE
PFDN1	-0.0988662	-0.046615	0.0291589	1835	0.00745268	FALSE
NDUFA6	-0.0958985	-0.138201	0.0291606	1836	0.00745675	FALSE
ACVR1	0.0583322	0.0531908	0.0292363	1837	0.00746081	FALSE
NRF1	-0.0865041	-0.122141	0.0292829	1838	0.00746487	FALSE
PLSCR1	0.0302493	0.0449571	0.0293608	1839	0.00746893	FALSE
HSP90AB3P	0.0245549	-0.0167582	0.0293885	1840	0.00747299	FALSE
LAPTM4B	0.00829391	0.0315361	0.0293957	1841	0.00747705	FALSE
GPT	-0.0808985	-0.154963	0.0294421	1842	0.00748111	FALSE
HSPD1	-0.0647748	-0.0448781	0.0294816	1843	0.00748518	FALSE
GPX8	0.0343372	-0.0119089	0.02949	1844	0.00748924	FALSE
HLA.DRB1.2	0.0142169	0.0225023	0.0294975	1845	0.0074933	FALSE
PANK4	-0.184469	-0.139613	0.0295413	1846	0.00749736	FALSE
ECHDC3	0.0456565	0.0308868	0.029559	1847	0.00750142	FALSE
NA.5	0.156448	0.114034	0.0295658	1848	0.00750548	FALSE
EDF1	-0.086652	-0.0499568	0.0295676	1849	0.00750954	FALSE
DOHH	-0.157848	-0.12806	0.029575	1850	0.00751361	FALSE
RPS3A	-0.109704	-0.12246	0.0295771	1851	0.00751767	FALSE
CLMN	0.062821	0.0588827	0.0295962	1852	0.00752173	FALSE
CCDC144A	0.0292687	0.0429756	0.0296358	1853	0.00752579	FALSE
WDR41	-0.125418	-0.115918	0.0296961	1854	0.00752985	FALSE
GNAT3	-0.000493224	-0.0201594	0.0298367	1855	0.00753391	FALSE
MGST1	0.103234	0.0811566	0.0299255	1856	0.00753797	FALSE
ECD	-0.0582422	-0.0359094	0.0299308	1857	0.00754204	FALSE
RPAP2	-0.0473766	-0.0308719	0.0300453	1858	0.0075461	FALSE
SULT1B1	0.0967752	0.0700146	0.0300482	1859	0.00755016	FALSE
RCOR3	0.07674	0.046692	0.0300734	1860	0.00755422	FALSE
TLR2	-0.106499	-0.0597078	0.0301012	1861	0.00755828	FALSE
PPP2R3B	0.00815742	-0.00750963	0.0301387	1862	0.00756234	FALSE
ATP6V1G2	0.0442879	0.0677567	0.0301397	1863	0.0075664	FALSE
SLC25A44	-0.104791	-0.107098	0.0301652	1864	0.00757047	FALSE
RNF219	-0.0645144	-0.0927838	0.0301969	1865	0.00757453	FALSE
POLR2F	-0.0949757	-0.120242	0.0302651	1866	0.00757859	FALSE
BAX	-0.0427104	-0.0586655	0.0302748	1867	0.00758265	FALSE
NFYA	0.00572349	0.0394668	0.0302781	1868	0.00758671	FALSE
CAPN5	0.0608713	0.0398083	0.0302838	1869	0.00759077	FALSE
PAN3	-0.131028	-0.108132	0.0304169	1870	0.00759483	FALSE
HMBS	-0.0790051	-0.0766999	0.030505	1871	0.00759889	FALSE
EHD4	0.0574533	0.0517635	0.0305731	1872	0.00760296	FALSE
GSKIP	-0.0325248	-0.077101	0.0305745	1873	0.00760702	FALSE
TAB2	-0.0576385	-0.0142053	0.0306113	1874	0.00761108	FALSE
RIC8B	-0.0444154	-0.0698721	0.0306474	1875	0.00761514	FALSE
HPS4	0.02267	0.0283317	0.030649	1876	0.0076192	FALSE
PAX5	0.0834542	0.136977	0.0306745	1877	0.00762326	FALSE
HDGFRP3	-0.0234833	-0.00592276	0.0307308	1878	0.00762732	FALSE
KIDINS220	0.0414086	0.0613855	0.0307648	1879	0.00763139	FALSE
CD46.1	0.00197786	-0.00338012	0.0308179	1880	0.00763545	FALSE
SCRN1	0.0700614	0.0243139	0.0309005	1881	0.00763951	FALSE
MTA3	0.0671074	0.0771746	0.030902	1882	0.00764357	FALSE
SMARCD2	0.0620335	0.0835143	0.0309144	1883	0.00764763	FALSE
ATRX	0.0794572	0.111971	0.0309371	1884	0.00765169	FALSE
GNAS.1	0.0798344	0.0823344	0.0309522	1885	0.00765576	FALSE
TEP1	0.0521876	0.0425325	0.0309546	1886	0.00765982	FALSE
CDC34	-0.0435662	-0.0551516	0.0309739	1887	0.00766388	FALSE
AFF4	0.0520876	0.0549019	0.0309873	1888	0.00766794	FALSE
RBMS2	0.100658	0.0815505	0.0310549	1889	0.007672	FALSE
NUFIP2	-0.0248821	-0.101531	0.0310841	1890	0.00767606	FALSE
POT1	-0.0561333	-0.0169319	0.0311294	1891	0.00768012	FALSE
GTF2A1	-0.0350577	-0.00653118	0.0311789	1892	0.00768418	FALSE
SAMD12	0.015074	-0.0208259	0.0313	1893	0.00768825	FALSE
LRCH1	-0.0126311	-0.0218236	0.0313067	1894	0.00769231	FALSE
SNRNP35	0.135913	0.133451	0.0313143	1895	0.00769637	FALSE
DNAJC9	-0.0961576	-0.0563327	0.0313254	1896	0.00770043	FALSE
AP4E1	-0.117758	-0.106939	0.0313868	1897	0.00770449	FALSE
GOLPH3	0.127732	0.103733	0.0314347	1898	0.00770855	FALSE
DGKQ	-0.0680276	-0.0815536	0.0314388	1899	0.00771261	FALSE
CLEC2D	-0.000864414	0.0209293	0.0315087	1900	0.00771668	FALSE
KMO	0.0371496	0.0909892	0.0315214	1901	0.00772074	FALSE
CD44	0.102524	0.0517849	0.0315543	1902	0.0077248	FALSE
CD79B	0.0393752	0.0350894	0.0315966	1903	0.00772886	FALSE
MTIF2	0.0799797	0.0399224	0.0316093	1904	0.00773292	FALSE
PHYKPL	-0.0337422	0.0335791	0.0316594	1905	0.00773698	FALSE
TPM1	0.00613943	0.0162534	0.0316602	1906	0.00774105	FALSE
CMAS	0.116337	0.0860456	0.0316614	1907	0.00774511	FALSE
SLITRK6	0.0602582	0.0643048	0.0316874	1908	0.00774917	FALSE
TMBIM6	-0.0347066	-0.0201088	0.0316878	1909	0.00775323	FALSE
RFX7	-0.0410678	-0.0349867	0.0317	1910	0.00775729	FALSE
ARID1A	0.0145406	0.0725569	0.0317127	1911	0.00776135	FALSE
EAF2	0.109946	0.119997	0.0317197	1912	0.00776541	FALSE
EIF1AX	-0.052694	-0.103427	0.0317418	1913	0.00776947	FALSE
NRGN	0.072051	0.110041	0.0317833	1914	0.00777354	FALSE
MID1	-0.0152449	-0.0689947	0.0318857	1915	0.0077776	FALSE
SPATS2	0.100691	0.12292	0.031917	1916	0.00778166	FALSE
ATHL1	-0.127874	-0.111474	0.0319182	1917	0.00778572	FALSE
UCHL3	7.36e-05	-0.0584936	0.031923	1918	0.00778978	FALSE
MB	-0.0211715	0.03136	0.0319244	1919	0.00779384	FALSE
AP3M2	-0.0976441	-0.152679	0.0319314	1920	0.0077979	FALSE
WNK4	0.109198	0.0944269	0.0320444	1921	0.00780197	FALSE
INPP5A	0.0524704	0.0447567	0.0320522	1922	0.00780603	FALSE
KIAA0232	-0.04846	-0.0633154	0.0321022	1923	0.00781009	FALSE
GPX1	-0.102605	-0.102957	0.0321117	1924	0.00781415	FALSE
EIF1	-0.0849299	-0.0819218	0.0322926	1925	0.00781821	FALSE
MYO1G	-0.0879225	-0.105712	0.0323151	1926	0.00782227	FALSE
E2F5	-0.012333	-0.0160319	0.0323529	1927	0.00782633	FALSE
ABTB1	0.136616	0.186835	0.0323529	1928	0.0078304	FALSE
LCA5	-0.00884091	0.0112826	0.0324182	1929	0.00783446	FALSE
CHST5	-0.0621612	-0.08208	0.0324288	1930	0.00783852	FALSE
ILVBL	0.0469728	0.0492809	0.0324525	1931	0.00784258	FALSE
ACLY	-0.063986	-0.0881087	0.0324538	1932	0.00784664	FALSE
TUBB4B	-0.0756042	-0.0965025	0.0324735	1933	0.0078507	FALSE
STAP1	0.0447875	0.0509745	0.0325017	1934	0.00785476	FALSE
POLR2M.1	-0.0143439	-0.0521797	0.0325233	1935	0.00785882	FALSE
MT.ATP8	-0.160444	-0.158556	0.0325314	1936	0.00786289	FALSE
RAPGEFL1	0.0426533	0.0541314	0.0325322	1937	0.00786695	FALSE
AARSD1	-0.0561312	-0.0575248	0.0325324	1938	0.00787101	FALSE
ARHGEF7	-0.106974	-0.0537001	0.0325421	1939	0.00787507	FALSE
INF2	0.0866502	0.0859594	0.0325923	1940	0.00787913	FALSE
STK32C	0.051511	-0.0112948	0.0326207	1941	0.00788319	FALSE
UTY	0.0316318	-0.0124234	0.0326395	1942	0.00788725	FALSE
ZNF354A	-0.0600671	-0.0303609	0.0326437	1943	0.00789132	FALSE
PAPOLA	-0.103428	-0.0855853	0.0326617	1944	0.00789538	FALSE
MEF2A	0.0132347	-0.0363792	0.0326929	1945	0.00789944	FALSE
MBTPS1	-0.0430803	-0.0442309	0.0326966	1946	0.0079035	FALSE
MPP7	0.0581089	0.0515735	0.0326977	1947	0.00790756	FALSE
EIF4B	-0.0275849	-0.00621327	0.0326989	1948	0.00791162	FALSE
HNRNPA0	-0.098472	-0.0853185	0.0327311	1949	0.00791569	FALSE
PLXNB2	0.0842037	0.108674	0.0327392	1950	0.00791975	FALSE
SNRNP27	-0.0804454	-0.069701	0.0327446	1951	0.00792381	FALSE
SPTAN1.1	0.0429987	0.0499513	0.0327636	1952	0.00792787	FALSE
SYVN1	0.0476168	0.0786358	0.0327937	1953	0.00793193	FALSE
OLFML2B	0.141391	0.127226	0.0327943	1954	0.00793599	FALSE
TNFSF9	-0.00611425	0.000692791	0.032865	1955	0.00794005	FALSE
IRAK4	-0.0894845	-0.123493	0.0329609	1956	0.00794411	FALSE
METTL6	0.0697878	0.0666561	0.0329654	1957	0.00794818	FALSE
HDHD1	-0.143953	-0.14082	0.0330396	1958	0.00795224	FALSE
CMC2	-0.0679113	-0.0400465	0.0330444	1959	0.0079563	FALSE
PPP2R3A	0.028826	0.0265586	0.0330812	1960	0.00796036	FALSE
RAB28	-0.0157169	0.018024	0.0331038	1961	0.00796442	FALSE
PAPD5	-0.0320391	-0.0822639	0.0331097	1962	0.00796848	FALSE
PHF23	-0.101359	-0.170686	0.0331212	1963	0.00797254	FALSE
TRAPPC12	-0.110358	-0.0915584	0.0331544	1964	0.00797661	FALSE
PGS1	-0.0247906	0.0424555	0.0331689	1965	0.00798067	FALSE
UBQLN1	-0.117543	-0.0621451	0.0331745	1966	0.00798473	FALSE
SPANXA1	0.045273	0.0969236	0.0331961	1967	0.00798879	FALSE
NAGLT1	-0.0912059	-0.118955	0.0332359	1968	0.00799285	FALSE
EXOSC6	-0.0450023	-0.0600287	0.0332843	1969	0.00799691	FALSE
ZNF627	-0.00238852	-0.00892677	0.0332905	1970	0.00800098	FALSE
GMDS	-0.136716	-0.128736	0.0332957	1971	0.00800504	FALSE
TMEM237	0.0990928	0.0892962	0.0332961	1972	0.0080091	FALSE
ANK3	0.0604894	0.0928217	0.0332964	1973	0.00801316	FALSE
VHL	0.0479233	0.0337616	0.0333302	1974	0.00801722	FALSE
GRB2	-0.0996054	-0.0769065	0.0333379	1975	0.00802128	FALSE
PXDC1	0.0609595	0.0719485	0.0334017	1976	0.00802534	FALSE
COL4A6	-0.0167883	0.000130758	0.0334391	1977	0.0080294	FALSE
ALS2	-0.137305	-0.113777	0.0334456	1978	0.00803347	FALSE
ATG12	-0.120083	-0.116368	0.0335026	1979	0.00803753	FALSE
ANP32B	-0.145488	-0.15047	0.0335358	1980	0.00804159	FALSE
TOP2A	0.0228918	0.0463159	0.0335554	1981	0.00804565	FALSE
DHX15	-0.055647	-0.0207358	0.0336371	1982	0.00804971	FALSE
NRBF2	-0.0569303	-0.020012	0.033673	1983	0.00805377	FALSE
SYNPO2L	0.136938	0.123519	0.0337981	1984	0.00805783	FALSE
SKA3	-0.10393	-0.121775	0.0338007	1985	0.0080619	FALSE
ERMP1	0.0107447	0.0248587	0.0338308	1986	0.00806596	FALSE
PRPS1	-0.088101	-0.0860327	0.033841	1987	0.00807002	FALSE
CHFR	0.0136992	0.0651078	0.0338459	1988	0.00807408	FALSE
ZCCHC2	0.0388186	0.056586	0.0339022	1989	0.00807814	FALSE
RFXAP	-0.102402	-0.052001	0.0339125	1990	0.0080822	FALSE
SKIV2L	0.0165352	0.00223083	0.0339604	1991	0.00808626	FALSE
PRMT10	-0.092065	-0.0805053	0.0339723	1992	0.00809033	FALSE
BLOC1S2	-0.127526	-0.0702368	0.033976	1993	0.00809439	FALSE
STAT5A	-0.0985638	-0.138263	0.0340204	1994	0.00809845	FALSE
ZKSCAN4	0.000633985	0.0129063	0.0340207	1995	0.00810251	FALSE
DNAJB4	0.0615515	0.0958598	0.0340449	1996	0.00810657	FALSE
C12orf23	-0.140921	-0.147167	0.0340634	1997	0.00811063	FALSE
CCNYL1	0.0461907	0.0122931	0.0340743	1998	0.00811469	FALSE
ELAC1	-0.0455095	-0.037251	0.0342033	1999	0.00811876	FALSE
[truncated: 10,312 more rows]

## Sheet: RNA_Corr_pvalue_GeneAneuploidy
RNA_ID	Aneuploidy Score (not corrected for ploidy) correlation coefficient	Aneuploidy Score correlation coefficient	Pvalue	Pvalue Rank	B.H. Critical Value	Significant	RNA_Name
TSPAN15..23555.	0.348943	0.390593	7.71e-36	1	2.61e-06	TRUE	TSPAN15
KIAA1522..57648.	0.362806	0.3879	2.49e-35	2	5.22e-06	TRUE	KIAA1522
CTSV..1515.	0.365297	0.383113	1.95e-34	3	7.84e-06	TRUE	CTSV
LAMA5..3911.	0.355274	0.383014	2.04e-34	4	1.04e-05	TRUE	LAMA5
RPL3..6122.	-0.372508	-0.376871	2.72e-33	5	1.31e-05	TRUE	RPL3
KRT8..3856.	0.359416	0.373967	9.07e-33	6	1.57e-05	TRUE	KRT8
CELSR1..9620.	0.356825	0.372329	1.78e-32	7	1.83e-05	TRUE	CELSR1
PPP3CC..5533.	-0.362408	-0.370099	4.43e-32	8	2.09e-05	TRUE	PPP3CC
RPL34..6164.	-0.361786	-0.369698	5.22e-32	9	2.35e-05	TRUE	RPL34
TUFT1..7286.	0.356081	0.369629	5.37e-32	10	2.61e-05	TRUE	TUFT1
SHTN1..57698.	0.359447	0.367684	1.18e-31	11	2.87e-05	TRUE	SHTN1
RIPK4..54101.	0.360178	0.367065	1.52e-31	12	3.13e-05	TRUE	RIPK4
TMEM184A..202915.	0.322067	0.365437	2.92e-31	13	3.4e-05	TRUE	TMEM184A
KRT80..144501.	0.338863	0.365063	3.39e-31	14	3.66e-05	TRUE	KRT80
KRT18..3875.	0.357596	0.364011	5.16e-31	15	3.92e-05	TRUE	KRT18
BAIAP2L1..55971.	0.357433	0.358315	4.89e-30	16	4.18e-05	TRUE	BAIAP2L1
EFNA1..1942.	0.333764	0.356973	8.25e-30	17	4.44e-05	TRUE	EFNA1
TTLL3..26140.	-0.356053	-0.35688	8.55e-30	18	4.7e-05	TRUE	TTLL3
MOB3A..126308.	-0.361161	-0.355741	1.33e-29	19	4.96e-05	TRUE	MOB3A
RHPN2..85415.	0.342365	0.354658	2.02e-29	20	5.22e-05	TRUE	RHPN2
SOX13..9580.	0.364771	0.354303	2.32e-29	21	5.48e-05	TRUE	SOX13
HSPA1A..3303.	0.337424	0.353969	2.64e-29	22	5.75e-05	TRUE	HSPA1A
SEPT1..1731.	-0.358905	-0.352904	3.97e-29	23	6.01e-05	TRUE	SEPTIN1
MLF1..4291.	0.345859	0.352847	4.06e-29	24	6.27e-05	TRUE	MLF1
HSPA1B..3304.	0.338152	0.352219	5.16e-29	25	6.53e-05	TRUE	HSPA1B
DDX27..55661.	0.344784	0.34901	1.75e-28	26	6.79e-05	TRUE	DDX27
WWC1..23286.	0.323288	0.347896	2.66e-28	27	7.05e-05	TRUE	WWC1
PPL..5493.	0.318779	0.347895	2.66e-28	28	7.31e-05	TRUE	PPL
PXK..54899.	-0.333762	-0.347197	3.46e-28	29	7.57e-05	TRUE	PXK
RPL17..6139.	-0.340103	-0.347171	3.49e-28	30	7.84e-05	TRUE	RPL17
MAP3K13..9175.	0.336152	0.345921	5.58e-28	31	8.1e-05	TRUE	MAP3K13
DDR1..780.	0.336439	0.344314	1.02e-27	32	8.36e-05	TRUE	DDR1
RPL22L1..200916.	-0.316469	-0.344045	1.12e-27	33	8.62e-05	TRUE	RPL22L1
CLDN4..1364.	0.324815	0.343779	1.24e-27	34	8.88e-05	TRUE	CLDN4
FAM241B..219738.	0.294292	0.34267	1.87e-27	35	9.14e-05	TRUE	FAM241B
C1orf54..79630.	-0.342927	-0.34158	2.79e-27	36	9.4e-05	TRUE	C1orf54
SASH3..54440.	-0.348172	-0.341574	2.8e-27	37	9.66e-05	TRUE	SASH3
BAIAP2..10458.	0.327152	0.341185	3.23e-27	38	9.92e-05	TRUE	BAIAP2
EEF2..1938.	-0.339518	-0.340047	4.9e-27	39	0.00010186	TRUE	EEF2
POLH..5429.	-0.344435	-0.339893	5.18e-27	40	0.000104471	TRUE	POLH
SETDB2..83852.	-0.339518	-0.339094	6.94e-27	41	0.000107083	TRUE	SETDB2
DCK..1633.	-0.327712	-0.338594	8.33e-27	42	0.000109695	TRUE	DCK
ADGRG1..9289.	0.321802	0.338533	8.51e-27	43	0.000112307	TRUE	ADGRG1
RASSF1..11186.	-0.312727	-0.337246	1.36e-26	44	0.000114919	TRUE	RASSF1
MAL2..114569.	0.296836	0.337238	1.36e-26	45	0.00011753	TRUE	MAL2
HVCN1..84329.	-0.346553	-0.337021	1.47e-26	46	0.000120142	TRUE	HVCN1
TOM1L1..10040.	0.326611	0.336777	1.61e-26	47	0.000122754	TRUE	TOM1L1
TLCD1..116238.	0.334243	0.336673	1.67e-26	48	0.000125366	TRUE	TLCD1
PLPP2..8612.	0.331784	0.336203	1.98e-26	49	0.000127977	TRUE	PLPP2
ZCCHC7..84186.	-0.313223	-0.334657	3.45e-26	50	0.000130589	TRUE	ZCCHC7
RPL10A..4736.	-0.328151	-0.333651	4.95e-26	51	0.000133201	TRUE	RPL10A
PIP4K2C..79837.	0.331181	0.333222	5.77e-26	52	0.000135813	TRUE	PIP4K2C
FAM83H..286077.	0.278284	0.332557	7.31e-26	53	0.000138425	TRUE	FAM83H
IGSF3..3321.	0.315177	0.332093	8.62e-26	54	0.000141036	TRUE	IGSF3
P2RY2..5029.	0.287904	0.331658	1.01e-25	55	0.000143648	TRUE	P2RY2
BCAM..4059.	0.310273	0.331515	1.06e-25	56	0.00014626	TRUE	BCAM
PKP3..11187.	0.313295	0.32995	1.84e-25	57	0.000148872	TRUE	PKP3
CD248..57124.	-0.308072	-0.329335	2.29e-25	58	0.000151483	TRUE	CD248
CHMP4C..92421.	0.29987	0.328911	2.65e-25	59	0.000154095	TRUE	CHMP4C
PLEKHG3..26030.	0.304782	0.328232	3.37e-25	60	0.000156707	TRUE	PLEKHG3
RAB5IF..55969.	0.323544	0.327433	4.45e-25	61	0.000159319	TRUE	RAB5IF
PDGFB..5155.	0.281999	0.327395	4.51e-25	62	0.000161931	TRUE	PDGFB
KBTBD8..84541.	-0.318407	-0.327168	4.88e-25	63	0.000164542	TRUE	KBTBD8
RASEF..158158.	0.305604	0.326906	5.35e-25	64	0.000167154	TRUE	RASEF
IFFO1..25900.	-0.306686	-0.32671	5.73e-25	65	0.000169766	TRUE	IFFO1
PRXL2A..84293.	0.271081	0.326568	6.02e-25	66	0.000172378	TRUE	PRXL2A
CCNJL..79616.	0.310218	0.326224	6.79e-25	67	0.00017499	TRUE	CCNJL
SPR..6697.	0.310692	0.32573	8.05e-25	68	0.000177601	TRUE	SPR
ELF3..1999.	0.297654	0.325496	8.74e-25	69	0.000180213	TRUE	ELF3
FAM84B..157638.	0.296323	0.324926	1.06e-24	70	0.000182825	TRUE	FAM84B
RHOA..387.	-0.293393	-0.324831	1.1e-24	71	0.000185437	TRUE	RHOA
INPP5B..3633.	-0.35051	-0.324805	1.11e-24	72	0.000188048	TRUE	INPP5B
MYO5B..4645.	0.297955	0.32469	1.15e-24	73	0.00019066	TRUE	MYO5B
XPC..7508.	-0.313743	-0.324494	1.24e-24	74	0.000193272	TRUE	XPC
EEF1A2..1917.	0.27195	0.324452	1.25e-24	75	0.000195884	TRUE	EEF1A2
RPL29..6159.	-0.305822	-0.323782	1.58e-24	76	0.000198496	TRUE	RPL29
EPCAM..4072.	0.287686	0.323764	1.59e-24	77	0.000201107	TRUE	EPCAM
ADPRM..56985.	-0.281325	-0.323433	1.78e-24	78	0.000203719	TRUE	ADPRM
MMAA..166785.	-0.315697	-0.322813	2.2e-24	79	0.000206331	TRUE	MMAA
SDC4..6385.	0.335335	0.322288	2.64e-24	80	0.000208943	TRUE	SDC4
ARHGEF16..27237.	0.282908	0.322085	2.83e-24	81	0.000211555	TRUE	ARHGEF16
CD52..1043.	-0.333213	-0.322029	2.88e-24	82	0.000214166	TRUE	CD52
DDHD1..80821.	-0.330987	-0.321721	3.2e-24	83	0.000216778	TRUE	DDHD1
SLC9B2..133308.	-0.331819	-0.321511	3.44e-24	84	0.00021939	TRUE	SLC9B2
C10orf143..387723.	-0.322845	-0.321291	3.71e-24	85	0.000222002	TRUE	C10orf143
GRAP..10750.	-0.309754	-0.320867	4.29e-24	86	0.000224613	TRUE	GRAP
MYO9B..4650.	-0.293744	-0.319775	6.22e-24	87	0.000227225	TRUE	MYO9B
NHLRC1..378884.	0.28072	0.319512	6.8e-24	88	0.000229837	TRUE	NHLRC1
RPS6..6194.	-0.291377	-0.319405	7.05e-24	89	0.000232449	TRUE	RPS6
AKNA..80709.	-0.324837	-0.319289	7.33e-24	90	0.000235061	TRUE	AKNA
EPB41L1..2036.	0.311062	0.319218	7.51e-24	91	0.000237672	TRUE	EPB41L1
EEF1B2..1933.	-0.326925	-0.318626	9.17e-24	92	0.000240284	TRUE	EEF1B2
TRIM35..23087.	-0.315865	-0.318289	1.03e-23	93	0.000242896	TRUE	TRIM35
BLOC1S6..26258.	-0.321099	-0.317767	1.23e-23	94	0.000245508	TRUE	BLOC1S6
ME2..4200.	-0.309171	-0.317749	1.23e-23	95	0.00024812	TRUE	ME2
PAK4..10298.	0.286617	0.317659	1.27e-23	96	0.000250731	TRUE	PAK4
GRB7..2886.	0.289458	0.31713	1.52e-23	97	0.000253343	TRUE	GRB7
WAS..7454.	-0.337329	-0.31671	1.75e-23	98	0.000255955	TRUE	WAS
F11R..50848.	0.279794	0.31643	1.92e-23	99	0.000258567	TRUE	F11R
NLRC3..197358.	-0.334391	-0.316401	1.94e-23	100	0.000261178	TRUE	NLRC3
WFDC2..10406.	0.286004	0.316251	2.04e-23	101	0.00026379	TRUE	WFDC2
SEC31B..25956.	-0.343501	-0.316239	2.05e-23	102	0.000266402	TRUE	SEC31B
RPS3A..6189.	-0.335859	-0.315958	2.25e-23	103	0.000269014	TRUE	RPS3A
UBE2D3..7323.	-0.321906	-0.315563	2.57e-23	104	0.000271626	TRUE	UBE2D3
GRAPL..400581.	-0.304203	-0.315488	2.63e-23	105	0.000274237	TRUE	GRAPL
CARM1..10498.	-0.304211	-0.315404	2.71e-23	106	0.000276849	TRUE	CARM1
PTPRF..5792.	0.313241	0.315249	2.85e-23	107	0.000279461	TRUE	PTPRF
RAP1GDS1..5910.	-0.308624	-0.315222	2.88e-23	108	0.000282073	TRUE	RAP1GDS1
PATJ..10207.	0.292431	0.31422	4.01e-23	109	0.000284684	TRUE	PATJ
TNFRSF21..27242.	0.320389	0.314194	4.05e-23	110	0.000287296	TRUE	TNFRSF21
WNT7B..7477.	0.305363	0.314153	4.1e-23	111	0.000289908	TRUE	WNT7B
KRT15..3866.	0.318834	0.313952	4.39e-23	112	0.00029252	TRUE	KRT15
CFAP97..57587.	-0.314623	-0.31353	5.05e-23	113	0.000295132	TRUE	CFAP97
TRIM22..10346.	-0.281162	-0.313498	5.1e-23	114	0.000297743	TRUE	TRIM22
CASP3..836.	-0.300897	-0.313302	5.44e-23	115	0.000300355	TRUE	CASP3
CD79A..973.	-0.309465	-0.313269	5.5e-23	116	0.000302967	TRUE	CD79A
TSKU..25987.	0.303028	0.313225	5.58e-23	117	0.000305579	TRUE	TSKU
AIF1L..83543.	0.260328	0.312695	6.65e-23	118	0.000308191	TRUE	AIF1L
CD72..971.	-0.311585	-0.312534	7.02e-23	119	0.000310802	TRUE	CD72
NDST2..8509.	-0.340339	-0.312477	7.15e-23	120	0.000313414	TRUE	NDST2
MYH14..79784.	0.29814	0.312284	7.62e-23	121	0.000316026	TRUE	MYH14
ARHGAP39..80728.	0.2637	0.311825	8.86e-23	122	0.000318638	TRUE	ARHGAP39
DIRC2..84925.	0.325542	0.311775	9.01e-23	123	0.000321249	TRUE	DIRC2
CYB561..1534.	0.267576	0.311654	9.38e-23	124	0.000323861	TRUE	CYB561
CD53..963.	-0.331146	-0.310846	1.22e-22	125	0.000326473	TRUE	CD53
EDEM1..9695.	-0.287213	-0.310733	1.27e-22	126	0.000329085	TRUE	EDEM1
BMP2K..55589.	-0.320604	-0.310644	1.31e-22	127	0.000331697	TRUE	BMP2K
TSPAN6..7105.	0.332863	0.31063	1.31e-22	128	0.000334308	TRUE	TSPAN6
PIGT..51604.	0.30245	0.310504	1.37e-22	129	0.00033692	TRUE	PIGT
NCKAP1L..3071.	-0.324741	-0.310196	1.51e-22	130	0.000339532	TRUE	NCKAP1L
RCBTB1..55213.	-0.324398	-0.310044	1.59e-22	131	0.000342144	TRUE	RCBTB1
RPS9..6203.	-0.296551	-0.309995	1.62e-22	132	0.000344756	TRUE	RPS9
LAPTM4B..55353.	0.295156	0.309796	1.72e-22	133	0.000347367	TRUE	LAPTM4B
RBM5..10181.	-0.308001	-0.309581	1.85e-22	134	0.000349979	TRUE	RBM5
ANKEF1..63926.	0.292003	0.309336	2e-22	135	0.000352591	TRUE	ANKEF1
TFAP2C..7022.	0.297965	0.309262	2.05e-22	136	0.000355203	TRUE	TFAP2C
CLPP..8192.	-0.318417	-0.309248	2.06e-22	137	0.000357814	TRUE	CLPP
SIT1..27240.	-0.308069	-0.3086	2.55e-22	138	0.000360426	TRUE	SIT1
TESPA1..9840.	-0.313804	-0.308307	2.8e-22	139	0.000363038	TRUE	TESPA1
EEF1A1..1915.	-0.28867	-0.308247	2.86e-22	140	0.00036565	TRUE	EEF1A1
ACAP1..9744.	-0.327936	-0.308187	2.91e-22	141	0.000368262	TRUE	ACAP1
DOK1..1796.	-0.29064	-0.30793	3.16e-22	142	0.000370873	TRUE	DOK1
SLC39A1..27173.	0.296513	0.307824	3.28e-22	143	0.000373485	TRUE	SLC39A1
USP4..7375.	-0.30051	-0.307503	3.63e-22	144	0.000376097	TRUE	USP4
ITGB4..3691.	0.288172	0.307408	3.75e-22	145	0.000378709	TRUE	ITGB4
ACTR8..93973.	-0.285435	-0.306984	4.3e-22	146	0.000381321	TRUE	ACTR8
CDS1..1040.	0.27364	0.306663	4.77e-22	147	0.000383932	TRUE	CDS1
APBB1IP..54518.	-0.300089	-0.30647	5.07e-22	148	0.000386544	TRUE	APBB1IP
ZMAT3..64393.	-0.262761	-0.306429	5.14e-22	149	0.000389156	TRUE	ZMAT3
ABI3..51225.	-0.298224	-0.306144	5.64e-22	150	0.000391768	TRUE	ABI3
LLGL2..3993.	0.251579	0.306096	5.73e-22	151	0.000394379	TRUE	LLGL2
FOXA1..3169.	0.270373	0.305235	7.55e-22	152	0.000396991	TRUE	FOXA1
KIAA1671..85379.	0.2903	0.305099	7.89e-22	153	0.000399603	TRUE	KIAA1671
B3GNT5..84002.	0.305705	0.304863	8.51e-22	154	0.000402215	TRUE	B3GNT5
PPM1M..132160.	-0.299341	-0.304806	8.66e-22	155	0.000404827	TRUE	PPM1M
SCNN1A..6337.	0.292827	0.304137	1.07e-21	156	0.000407438	TRUE	SCNN1A
XYLT1..64131.	-0.295399	-0.304116	1.08e-21	157	0.00041005	TRUE	XYLT1
MAP7..9053.	0.25104	0.304028	1.11e-21	158	0.000412662	TRUE	MAP7
INPP5D..3635.	-0.314944	-0.303387	1.36e-21	159	0.000415274	TRUE	INPP5D
VWA1..64856.	0.276681	0.303209	1.44e-21	160	0.000417885	TRUE	VWA1
BLK..640.	-0.28778	-0.303079	1.5e-21	161	0.000420497	TRUE	BLK
PON3..5446.	0.259471	0.303044	1.52e-21	162	0.000423109	TRUE	PON3
ABRAXAS1..84142.	-0.29524	-0.303016	1.53e-21	163	0.000425721	TRUE	ABRAXAS1
ETNK2..55224.	0.293165	0.302714	1.69e-21	164	0.000428333	TRUE	ETNK2
IQANK1..642574.	0.257566	0.302678	1.71e-21	165	0.000430944	TRUE	IQANK1
KLC3..147700.	0.261804	0.30264	1.73e-21	166	0.000433556	TRUE	KLC3
TBC1D10C..374403.	-0.328817	-0.302575	1.77e-21	167	0.000436168	TRUE	TBC1D10C
P2RY8..286530.	-0.307342	-0.301859	2.21e-21	168	0.00043878	TRUE	P2RY8
VAPB..9217.	0.307996	0.301785	2.27e-21	169	0.000441392	TRUE	VAPB
TSPAN13..27075.	0.267665	0.301772	2.28e-21	170	0.000444003	TRUE	TSPAN13
MET..4233.	0.323697	0.301273	2.67e-21	171	0.000446615	TRUE	MET
SOWAHC..65124.	0.319574	0.300731	3.16e-21	172	0.000449227	TRUE	SOWAHC
PCDH1..5097.	0.274425	0.300415	3.5e-21	173	0.000451839	TRUE	PCDH1
C19orf33..64073.	0.301311	0.300347	3.57e-21	174	0.00045445	TRUE	C19orf33
LYPD3..27076.	0.287709	0.300322	3.6e-21	175	0.000457062	TRUE	LYPD3
CGN..57530.	0.273996	0.300291	3.63e-21	176	0.000459674	TRUE	CGN
CYFIP2..26999.	-0.328077	-0.300053	3.92e-21	177	0.000462286	TRUE	CYFIP2
MAP3K9..4293.	0.272409	0.300014	3.97e-21	178	0.000464898	TRUE	MAP3K9
IKZF1..10320.	-0.323571	-0.299795	4.25e-21	179	0.000467509	TRUE	IKZF1
DOCK11..139818.	-0.305108	-0.299595	4.52e-21	180	0.000470121	TRUE	DOCK11
GIT2..9815.	-0.313341	-0.299544	4.6e-21	181	0.000472733	TRUE	GIT2
EIF3L..51386.	-0.27645	-0.299513	4.64e-21	182	0.000475345	TRUE	EIF3L
ITGB6..3694.	0.270388	0.299464	4.71e-21	183	0.000477957	TRUE	ITGB6
PMEPA1..56937.	0.297254	0.298905	5.62e-21	184	0.000480568	TRUE	PMEPA1
ESRP2..80004.	0.271381	0.298344	6.69e-21	185	0.00048318	TRUE	ESRP2
ARHGAP9..64333.	-0.31438	-0.298259	6.87e-21	186	0.000485792	TRUE	ARHGAP9
ESRP1..54845.	0.26693	0.298026	7.39e-21	187	0.000488404	TRUE	ESRP1
THRB..7068.	0.270863	0.29781	7.91e-21	188	0.000491015	TRUE	THRB
STARD10..10809.	0.268816	0.297769	8.01e-21	189	0.000493627	TRUE	STARD10
RCSD1..92241.	-0.305544	-0.297549	8.58e-21	190	0.000496239	TRUE	RCSD1
RPL14..9045.	-0.267492	-0.29724	9.44e-21	191	0.000498851	TRUE	RPL14
ACOT4..122970.	0.239839	0.297068	9.96e-21	192	0.000501463	TRUE	ACOT4
KRT7..3855.	0.284371	0.297037	1.01e-20	193	0.000504074	TRUE	KRT7
AGRN..375790.	0.306663	0.296739	1.1e-20	194	0.000506686	TRUE	AGRN
WDR82..80335.	-0.28524	-0.296672	1.13e-20	195	0.000509298	TRUE	WDR82
TRIM16L..147166.	0.29233	0.296481	1.2e-20	196	0.00051191	TRUE	TRIM16L
KLHL6..89857.	-0.309682	-0.296159	1.32e-20	197	0.000514522	TRUE	KLHL6
EFNA5..1946.	0.281345	0.296026	1.38e-20	198	0.000517133	TRUE	EFNA5
TMEM204..79652.	-0.261942	-0.295886	1.44e-20	199	0.000519745	TRUE	TMEM204
SFN..2810.	0.285402	0.295713	1.52e-20	200	0.000522357	TRUE	SFN
KIAA0895..23366.	0.261643	0.295325	1.71e-20	201	0.000524969	TRUE	KIAA0895
YIPF6..286451.	0.286505	0.295313	1.72e-20	202	0.00052758	TRUE	YIPF6
CLEC11A..6320.	-0.279598	-0.295151	1.8e-20	203	0.000530192	TRUE	CLEC11A
CD79B..974.	-0.296317	-0.294804	2.01e-20	204	0.000532804	TRUE	CD79B
TOP2B..7155.	-0.292028	-0.294572	2.16e-20	205	0.000535416	TRUE	TOP2B
ST6GALNAC2..10610.	0.280946	0.294507	2.2e-20	206	0.000538028	TRUE	ST6GALNAC2
PTGIR..5739.	-0.284139	-0.294507	2.2e-20	207	0.000540639	TRUE	PTGIR
CPVL..54504.	0.273901	0.294028	2.55e-20	208	0.000543251	TRUE	CPVL
PERP..64065.	0.311704	0.293937	2.62e-20	209	0.000545863	TRUE	PERP
TMEM132A..54972.	0.271404	0.29376	2.77e-20	210	0.000548475	TRUE	TMEM132A
CEP170B..283638.	0.296832	0.293458	3.04e-20	211	0.000551087	TRUE	CEP170B
HES1..3280.	0.282371	0.293455	3.04e-20	212	0.000553698	TRUE	HES1
SHOC2..8036.	-0.306373	-0.293393	3.1e-20	213	0.00055631	TRUE	SHOC2
NUDT18..79873.	-0.274642	-0.293092	3.4e-20	214	0.000558922	TRUE	NUDT18
TACSTD2..4070.	0.277834	0.293043	3.45e-20	215	0.000561534	TRUE	TACSTD2
CDH1..999.	0.273668	0.293042	3.45e-20	216	0.000564145	TRUE	CDH1
TMEM30B..161291.	0.243957	0.292839	3.67e-20	217	0.000566757	TRUE	TMEM30B
RPS28..6234.	-0.295158	-0.292596	3.95e-20	218	0.000569369	TRUE	RPS28
TMEM54..113452.	0.280229	0.292491	4.08e-20	219	0.000571981	TRUE	TMEM54
COX18..285521.	-0.32126	-0.29215	4.53e-20	220	0.000574593	TRUE	COX18
RCBTB2..1102.	-0.297532	-0.29192	4.86e-20	221	0.000577204	TRUE	RCBTB2
AP1M2..10053.	0.269413	0.291859	4.95e-20	222	0.000579816	TRUE	AP1M2
LAMB3..3914.	0.303307	0.291681	5.22e-20	223	0.000582428	TRUE	LAMB3
S100A2..6273.	0.303603	0.2916	5.35e-20	224	0.00058504	TRUE	S100A2
DSG2..1829.	0.281213	0.291556	5.43e-20	225	0.000587651	TRUE	DSG2
ZEB1..6935.	-0.2564	-0.291548	5.44e-20	226	0.000590263	TRUE	ZEB1
MT.ND2..4536.	0.267376	0.291547	5.44e-20	227	0.000592875	TRUE	MT
AGAP2..116986.	-0.314417	-0.291535	5.46e-20	228	0.000595487	TRUE	AGAP2
FAM129C..199786.	-0.284468	-0.291425	5.65e-20	229	0.000598099	TRUE	FAM129C
GMFG..9535.	-0.307587	-0.29118	6.08e-20	230	0.00060071	TRUE	GMFG
TRIM47..91107.	0.273066	0.290726	6.98e-20	231	0.000603322	TRUE	TRIM47
EPN3..55040.	0.263126	0.290713	7.01e-20	232	0.000605934	TRUE	EPN3
CLDN9..9080.	0.235891	0.290705	7.02e-20	233	0.000608546	TRUE	CLDN9
CLDN1..9076.	0.306415	0.29066	7.12e-20	234	0.000611158	TRUE	CLDN1
CTTN..2017.	0.298847	0.290513	7.45e-20	235	0.000613769	TRUE	CTTN
BCAP31..10134.	0.281368	0.290423	7.65e-20	236	0.000616381	TRUE	BCAP31
EBF1..1879.	-0.269989	-0.290411	7.68e-20	237	0.000618993	TRUE	EBF1
RTL8A..26071.	0.280683	0.290365	7.79e-20	238	0.000621605	TRUE	RTL8A
PRSS22..64063.	0.274369	0.290272	8.01e-20	239	0.000624216	TRUE	PRSS22
PTPRC..5788.	-0.307075	-0.290264	8.03e-20	240	0.000626828	TRUE	PTPRC
RCE1..9986.	0.258784	0.290251	8.06e-20	241	0.00062944	TRUE	RCE1
MICAL1..64780.	-0.272629	-0.290133	8.36e-20	242	0.000632052	TRUE	MICAL1
CD84..8832.	-0.297054	-0.290093	8.45e-20	243	0.000634664	TRUE	CD84
HMBOX1..79618.	-0.316673	-0.289902	8.96e-20	244	0.000637275	TRUE	HMBOX1
RPL9..6133.	-0.275714	-0.289791	9.26e-20	245	0.000639887	TRUE	RPL9
SDC1..6382.	0.295091	0.289506	1.01e-19	246	0.000642499	TRUE	SDC1
IL21R..50615.	-0.283506	-0.289463	1.02e-19	247	0.000645111	TRUE	IL21R
MTHFD1L..25902.	-0.244917	-0.289163	1.12e-19	248	0.000647723	TRUE	MTHFD1L
SYT12..91683.	0.266365	0.28916	1.12e-19	249	0.000650334	TRUE	SYT12
FNBP1L..54874.	0.280045	0.288777	1.26e-19	250	0.000652946	TRUE	FNBP1L
SLC25A13..10165.	0.290975	0.288763	1.26e-19	251	0.000655558	TRUE	SLC25A13
ARHGAP15..55843.	-0.30377	-0.288706	1.28e-19	252	0.00065817	TRUE	ARHGAP15
CARD10..29775.	0.300292	0.288663	1.3e-19	253	0.000660781	TRUE	CARD10
CD48..962.	-0.291515	-0.288579	1.33e-19	254	0.000663393	TRUE	CD48
PTPRCAP..5790.	-0.31519	-0.288558	1.34e-19	255	0.000666005	TRUE	PTPRCAP
C1orf56..54964.	0.2434	0.288415	1.4e-19	256	0.000668617	TRUE	C1orf56
WNT9A..7483.	0.269361	0.288415	1.4e-19	257	0.000671229	TRUE	WNT9A
PARP15..165631.	-0.28471	-0.288255	1.47e-19	258	0.00067384	TRUE	PARP15
PLA2G16..11145.	0.294206	0.288191	1.5e-19	259	0.000676452	TRUE	PLA2G16
C6orf141..135398.	0.293385	0.288062	1.56e-19	260	0.000679064	TRUE	C6orf141
JAG2..3714.	0.251481	0.288032	1.57e-19	261	0.000681676	TRUE	JAG2
SLPI..6590.	0.271083	0.287877	1.65e-19	262	0.000684288	TRUE	SLPI
EIF3F..8665.	-0.264042	-0.287857	1.66e-19	263	0.000686899	TRUE	EIF3F
TACC2..10579.	0.271183	0.287826	1.67e-19	264	0.000689511	TRUE	TACC2
DOCK2..1794.	-0.301957	-0.287743	1.72e-19	265	0.000692123	TRUE	DOCK2
ZNF671..79891.	-0.266502	-0.28754	1.82e-19	266	0.000694735	TRUE	ZNF671
GET4..51608.	0.243231	0.2875	1.84e-19	267	0.000697346	TRUE	GET4
OVOL2..58495.	0.246843	0.287262	1.98e-19	268	0.000699958	TRUE	OVOL2
MAST3..23031.	-0.314233	-0.287212	2.01e-19	269	0.00070257	TRUE	MAST3
ZNF185..7739.	0.262665	0.2872	2.02e-19	270	0.000705182	TRUE	ZNF185
STYK1..55359.	0.265388	0.287048	2.11e-19	271	0.000707794	TRUE	STYK1
ATP1B1..481.	0.267261	0.287042	2.11e-19	272	0.000710405	TRUE	ATP1B1
ABCC3..8714.	0.27478	0.287011	2.13e-19	273	0.000713017	TRUE	ABCC3
DYM..54808.	-0.288483	-0.28697	2.16e-19	274	0.000715629	TRUE	DYM
CLMN..79789.	0.275986	0.286808	2.27e-19	275	0.000718241	TRUE	CLMN
PTPN3..5774.	0.261733	0.286788	2.28e-19	276	0.000720852	TRUE	PTPN3
SSH3..54961.	0.266563	0.286695	2.35e-19	277	0.000723464	TRUE	SSH3
LSR..51599.	0.244107	0.286394	2.57e-19	278	0.000726076	TRUE	LSR
SH2D3C..10044.	-0.310452	-0.28615	2.76e-19	279	0.000728688	TRUE	SH2D3C
TMPRSS13..84000.	0.251227	0.286142	2.77e-19	280	0.0007313	TRUE	TMPRSS13
MYCBP2..23077.	-0.289709	-0.286122	2.78e-19	281	0.000733911	TRUE	MYCBP2
MYO1G..64005.	-0.303839	-0.285851	3.02e-19	282	0.000736523	TRUE	MYO1G
GPRC5C..55890.	0.25229	0.285758	3.1e-19	283	0.000739135	TRUE	GPRC5C
TPT1..7178.	-0.265106	-0.28572	3.14e-19	284	0.000741747	TRUE	TPT1
RIC1..57589.	-0.288342	-0.285354	3.5e-19	285	0.000744359	TRUE	RIC1
ANGPTL6..83854.	-0.286983	-0.28535	3.5e-19	286	0.00074697	TRUE	ANGPTL6
STAP1..26228.	-0.298927	-0.28521	3.65e-19	287	0.000749582	TRUE	STAP1
TSPAN1..10103.	0.264816	0.284257	4.84e-19	288	0.000752194	TRUE	TSPAN1
CDC42BPG..55561.	0.242974	0.284014	5.2e-19	289	0.000754806	TRUE	CDC42BPG
SACM1L..22908.	-0.271421	-0.283784	5.56e-19	290	0.000757417	TRUE	SACM1L
PRPF6..24148.	0.260045	0.283247	6.51e-19	291	0.000760029	TRUE	PRPF6
TGFA..7039.	0.26885	0.283179	6.65e-19	292	0.000762641	TRUE	TGFA
SPN..6693.	-0.305698	-0.283062	6.88e-19	293	0.000765253	TRUE	SPN
TJP1..7082.	0.295819	0.282943	7.12e-19	294	0.000767865	TRUE	TJP1
MPZL2..10205.	0.269501	0.282606	7.87e-19	295	0.000770476	TRUE	MPZL2
MT.ND4L..4539.	0.270698	0.282489	8.14e-19	296	0.000773088	TRUE	MT
CMTM4..146223.	0.259818	0.282454	8.22e-19	297	0.0007757	TRUE	CMTM4
MIPOL1..145282.	0.269212	0.282342	8.5e-19	298	0.000778312	TRUE	MIPOL1
EMILIN1..11117.	-0.26664	-0.281982	9.44e-19	299	0.000780924	TRUE	EMILIN1
NGLY1..55768.	-0.274625	-0.281932	9.58e-19	300	0.000783535	TRUE	NGLY1
WDFY4..57705.	-0.288691	-0.28176	1.01e-18	301	0.000786147	TRUE	WDFY4
GRAMD2A..196996.	0.270709	0.281597	1.06e-18	302	0.000788759	TRUE	GRAMD2A
CD19..930.	-0.270631	-0.281541	1.07e-18	303	0.000791371	TRUE	CD19
RPL15..6138.	-0.254716	-0.281511	1.08e-18	304	0.000793982	TRUE	RPL15
MARVELD3..91862.	0.249773	0.281391	1.12e-18	305	0.000796594	TRUE	MARVELD3
ARHGEF6..9459.	-0.28786	-0.281261	1.17e-18	306	0.000799206	TRUE	ARHGEF6
STON2..85439.	0.24529	0.281236	1.17e-18	307	0.000801818	TRUE	STON2
TNFRSF13C..115650.	-0.286559	-0.28122	1.18e-18	308	0.00080443	TRUE	TNFRSF13C
SLAMF6..114836.	-0.280587	-0.281149	1.2e-18	309	0.000807041	TRUE	SLAMF6
SHB..6461.	0.284563	0.28089	1.3e-18	310	0.000809653	TRUE	SHB
MOCS3..27304.	0.259233	0.28082	1.33e-18	311	0.000812265	TRUE	MOCS3
ZNF205..7755.	0.266881	0.280745	1.36e-18	312	0.000814877	TRUE	ZNF205
ASMTL..8623.	-0.276882	-0.280611	1.41e-18	313	0.000817489	TRUE	ASMTL
RGL3..57139.	0.243626	0.280523	1.45e-18	314	0.0008201	TRUE	RGL3
PIKFYVE..200576.	-0.280782	-0.280517	1.45e-18	315	0.000822712	TRUE	PIKFYVE
DSC2..1824.	0.25312	0.28025	1.56e-18	316	0.000825324	TRUE	DSC2
RPL13A..23521.	-0.272178	-0.280241	1.57e-18	317	0.000827936	TRUE	RPL13A
SIX4..51804.	0.276978	0.280158	1.61e-18	318	0.000830547	TRUE	SIX4
HM13..81502.	0.290564	0.28012	1.62e-18	319	0.000833159	TRUE	HM13
STAU1..6780.	0.297248	0.280086	1.64e-18	320	0.000835771	TRUE	STAU1
GMEB1..10691.	-0.271762	-0.280047	1.66e-18	321	0.000838383	TRUE	GMEB1
SLC2A4RG..56731.	0.259036	0.280045	1.66e-18	322	0.000840995	TRUE	SLC2A4RG
PTPN7..5778.	-0.303472	-0.280006	1.68e-18	323	0.000843606	TRUE	PTPN7
GRHL1..29841.	0.255187	0.279985	1.69e-18	324	0.000846218	TRUE	GRHL1
PPP1R26..9858.	0.247029	0.279908	1.73e-18	325	0.00084883	TRUE	PPP1R26
RASGRP2..10235.	-0.309007	-0.279798	1.78e-18	326	0.000851442	TRUE	RASGRP2
RAP1GAP..5909.	0.241825	0.279784	1.79e-18	327	0.000854053	TRUE	RAP1GAP
KRT4..3851.	0.25943	0.279736	1.82e-18	328	0.000856665	TRUE	KRT4
MRVI1..10335.	-0.252983	-0.279678	1.85e-18	329	0.000859277	TRUE	MRVI1
EPHX1..2052.	0.269333	0.279665	1.85e-18	330	0.000861889	TRUE	EPHX1
CAPN2..824.	0.281346	0.279536	1.92e-18	331	0.000864501	TRUE	CAPN2
PLS1..5357.	0.256152	0.279226	2.11e-18	332	0.000867112	TRUE	PLS1
PDE1B..5153.	-0.300293	-0.279173	2.14e-18	333	0.000869724	TRUE	PDE1B
REPS2..9185.	0.264643	0.279113	2.18e-18	334	0.000872336	TRUE	REPS2
CXXC1..30827.	-0.307209	-0.279016	2.24e-18	335	0.000874948	TRUE	CXXC1
OAZ1..4946.	-0.254452	-0.278934	2.29e-18	336	0.00087756	TRUE	OAZ1
PLEKHG6..55200.	0.263347	0.278591	2.53e-18	337	0.000880171	TRUE	PLEKHG6
MAB21L4..79919.	0.242263	0.278567	2.55e-18	338	0.000882783	TRUE	MAB21L4
GPR174..84636.	-0.278636	-0.278426	2.65e-18	339	0.000885395	TRUE	GPR174
SLC38A5..92745.	-0.280864	-0.278354	2.71e-18	340	0.000888007	TRUE	SLC38A5
TFAP2A..7020.	0.290815	0.278315	2.74e-18	341	0.000890618	TRUE	TFAP2A
INHBB..3625.	0.267532	0.278314	2.74e-18	342	0.00089323	TRUE	INHBB
GRSF1..2926.	-0.2412	-0.277933	3.06e-18	343	0.000895842	TRUE	GRSF1
DOK3..79930.	-0.298986	-0.277928	3.06e-18	344	0.000898454	TRUE	DOK3
RASAL3..64926.	-0.301067	-0.277923	3.07e-18	345	0.000901066	TRUE	RASAL3
EGLN3..112399.	0.247772	0.277637	3.33e-18	346	0.000903677	TRUE	EGLN3
PIK3CG..5294.	-0.294634	-0.27762	3.35e-18	347	0.000906289	TRUE	PIK3CG
RILPL2..196383.	-0.292813	-0.277549	3.42e-18	348	0.000908901	TRUE	RILPL2
WASL..8976.	0.273227	0.277501	3.46e-18	349	0.000911513	TRUE	WASL
TMEM265..100862671.	0.23489	0.277473	3.49e-18	350	0.000914125	TRUE	TMEM265
MUC1..4582.	0.229984	0.277437	3.53e-18	351	0.000916736	TRUE	MUC1
PPIP5K2..23262.	-0.298811	-0.277418	3.55e-18	352	0.000919348	TRUE	PPIP5K2
HIST2H4A..8370.	0.245051	0.27729	3.68e-18	353	0.00092196	TRUE	HIST2H4A
RHOH..399.	-0.300456	-0.277161	3.82e-18	354	0.000924572	TRUE	RHOH
CLDN7..1366.	0.251413	0.277076	3.91e-18	355	0.000927183	TRUE	CLDN7
MTMR9..66036.	-0.271113	-0.276936	4.07e-18	356	0.000929795	TRUE	MTMR9
LAMC2..3918.	0.266435	0.276871	4.15e-18	357	0.000932407	TRUE	LAMC2
MT.ND4..4538.	0.265784	0.276816	4.21e-18	358	0.000935019	TRUE	MT
TMC7..79905.	0.28376	0.276789	4.25e-18	359	0.000937631	TRUE	TMC7
LRMP..4033.	-0.286829	-0.276648	4.42e-18	360	0.000940242	TRUE	LRMP
MPP3..4356.	0.269156	0.27661	4.47e-18	361	0.000942854	TRUE	MPP3
KCNA6..3742.	-0.264982	-0.276338	4.83e-18	362	0.000945466	TRUE	KCNA6
C4orf19..55286.	0.271414	0.276234	4.98e-18	363	0.000948078	TRUE	C4orf19
GANC..2595.	-0.262436	-0.275982	5.35e-18	364	0.00095069	TRUE	GANC
RFTN1..23180.	-0.264127	-0.275699	5.8e-18	365	0.000953301	TRUE	RFTN1
PKP2..5318.	0.257102	0.275609	5.95e-18	366	0.000955913	TRUE	PKP2
UTP3..57050.	-0.27023	-0.275609	5.95e-18	367	0.000958525	TRUE	UTP3
VMP1..81671.	0.296517	0.275549	6.05e-18	368	0.000961137	TRUE	VMP1
TMX3..54495.	-0.262557	-0.27545	6.23e-18	369	0.000963748	TRUE	TMX3
KLLN..100144748.	-0.312293	-0.275377	6.36e-18	370	0.00096636	TRUE	KLLN
IL12RB1..3594.	-0.280706	-0.275148	6.79e-18	371	0.000968972	TRUE	IL12RB1
AEBP1..165.	-0.266985	-0.275143	6.8e-18	372	0.000971584	TRUE	AEBP1
KLF5..688.	0.284698	0.275127	6.83e-18	373	0.000974196	TRUE	KLF5
KIFC3..3801.	0.279788	0.275113	6.85e-18	374	0.000976807	TRUE	KIFC3
CXCL16..58191.	0.264288	0.27504	7e-18	375	0.000979419	TRUE	CXCL16
DPM1..8813.	0.294939	0.275019	7.04e-18	376	0.000982031	TRUE	DPM1
TMEM131L..23240.	-0.272285	-0.274959	7.16e-18	377	0.000984643	TRUE	TMEM131L
MED28..80306.	-0.286398	-0.274911	7.26e-18	378	0.000987254	TRUE	MED28
ZC3H12D..340152.	-0.279602	-0.274669	7.78e-18	379	0.000989866	TRUE	ZC3H12D
MARVELD2..153562.	0.25202	0.274594	7.94e-18	380	0.000992478	TRUE	MARVELD2
CITED4..163732.	0.2321	0.27454	8.07e-18	381	0.00099509	TRUE	CITED4
DNAH14..127602.	0.240687	0.274273	8.7e-18	382	0.000997702	TRUE	DNAH14
ABHD17A..81926.	-0.29386	-0.27427	8.71e-18	383	0.00100031	TRUE	ABHD17A
CUEDC2..79004.	-0.302819	-0.274223	8.83e-18	384	0.00100292	TRUE	CUEDC2
CSNK1G2..1455.	-0.299578	-0.274178	8.94e-18	385	0.00100554	TRUE	CSNK1G2
G6PD..2539.	0.280912	0.274169	8.96e-18	386	0.00100815	TRUE	G6PD
EXOG..9941.	-0.256713	-0.274167	8.97e-18	387	0.00101076	TRUE	EXOG
TBC1D8..11138.	0.259455	0.274154	9e-18	388	0.00101337	TRUE	TBC1D8
MB..4151.	0.240398	0.274009	9.38e-18	389	0.00101598	TRUE	MB
CTNND1..1500.	0.273253	0.274009	9.38e-18	390	0.0010186	TRUE	CTNND1
ADRM1..11047.	0.303344	0.273985	9.44e-18	391	0.00102121	TRUE	ADRM1
AURKA..6790.	0.301528	0.273742	1.01e-17	392	0.00102382	TRUE	AURKA
B3GNT3..10331.	0.261309	0.273725	1.02e-17	393	0.00102643	TRUE	B3GNT3
C11orf52..91894.	0.253779	0.273665	1.03e-17	394	0.00102904	TRUE	C11orf52
CXorf21..80231.	-0.281461	-0.273597	1.05e-17	395	0.00103166	TRUE	CXorf21
MDM2..4193.	-0.269795	-0.273455	1.1e-17	396	0.00103427	TRUE	MDM2
ZNF330..27309.	-0.286255	-0.27327	1.16e-17	397	0.00103688	TRUE	ZNF330
CDH3..1001.	0.261589	0.273196	1.18e-17	398	0.00103949	TRUE	CDH3
SPIRE2..84501.	0.244802	0.273181	1.18e-17	399	0.0010421	TRUE	SPIRE2
NISCH..11188.	-0.281001	-0.27315	1.2e-17	400	0.00104471	TRUE	NISCH
IGLL1..3543.	-0.274001	-0.273037	1.23e-17	401	0.00104733	TRUE	IGLL1
DCN..1634.	-0.23772	-0.272983	1.25e-17	402	0.00104994	TRUE	DCN
HLA.DOA..3111.	-0.264371	-0.272973	1.26e-17	403	0.00105255	TRUE	HLA
KRT19..3880.	0.256611	0.272934	1.27e-17	404	0.00105516	TRUE	KRT19
GPR18..2841.	-0.264673	-0.272915	1.28e-17	405	0.00105777	TRUE	GPR18
SHQ1..55164.	-0.246375	-0.272844	1.3e-17	406	0.00106038	TRUE	SHQ1
PIR..8544.	0.273548	0.272816	1.31e-17	407	0.001063	TRUE	PIR
RPL36..25873.	-0.275094	-0.272784	1.33e-17	408	0.00106561	TRUE	RPL36
ZNF101..94039.	-0.277881	-0.272598	1.4e-17	409	0.00106822	TRUE	ZNF101
TAGAP..117289.	-0.281489	-0.272541	1.42e-17	410	0.00107083	TRUE	TAGAP
GRHL2..79977.	0.254246	0.27232	1.51e-17	411	0.00107344	TRUE	GRHL2
CCNG1..900.	-0.2484	-0.272314	1.51e-17	412	0.00107606	TRUE	CCNG1
SLC22A5..6584.	0.21767	0.271972	1.67e-17	413	0.00107867	TRUE	SLC22A5
ID1..3397.	0.269528	0.27186	1.72e-17	414	0.00108128	TRUE	ID1
SUGP2..10147.	-0.285841	-0.271738	1.78e-17	415	0.00108389	TRUE	SUGP2
GPAT3..84803.	0.301356	0.271706	1.79e-17	416	0.0010865	TRUE	GPAT3
C22orf15..150248.	-0.272337	-0.271661	1.82e-17	417	0.00108911	TRUE	C22orf15
HIC1..3090.	-0.246217	-0.271571	1.86e-17	418	0.00109173	TRUE	HIC1
YTHDF1..54915.	0.264055	0.271217	2.06e-17	419	0.00109434	TRUE	YTHDF1
CLEC3B..7123.	-0.25534	-0.271082	2.14e-17	420	0.00109695	TRUE	CLEC3B
MT.CO2..4513.	0.256805	0.271018	2.18e-17	421	0.00109956	TRUE	MT
BAX..581.	-0.252431	-0.270918	2.24e-17	422	0.00110217	TRUE	BAX
PRRG4..79056.	0.227349	0.270825	2.3e-17	423	0.00110479	TRUE	PRRG4
RPS27L..51065.	-0.241877	-0.270802	2.31e-17	424	0.0011074	TRUE	RPS27L
UPP1..7378.	0.284957	0.270736	2.35e-17	425	0.00111001	TRUE	UPP1
LIPH..200879.	0.250264	0.270558	2.47e-17	426	0.00111262	TRUE	LIPH
PRR33..102724536.	-0.273723	-0.270547	2.48e-17	427	0.00111523	TRUE	PRR33
RBM6..10180.	-0.262662	-0.270526	2.5e-17	428	0.00111784	TRUE	RBM6
DLG5..9231.	0.245574	0.270456	2.55e-17	429	0.00112046	TRUE	DLG5
NANOS1..340719.	0.229458	0.270286	2.67e-17	430	0.00112307	TRUE	NANOS1
LMNA..4000.	0.286974	0.270098	2.81e-17	431	0.00112568	TRUE	LMNA
WIPF1..7456.	-0.270249	-0.27	2.89e-17	432	0.00112829	TRUE	WIPF1
ALG1L..200810.	0.241639	0.269875	2.99e-17	433	0.0011309	TRUE	ALG1L
NSUN7..79730.	0.236769	0.269672	3.17e-17	434	0.00113351	TRUE	NSUN7
STIMATE..375346.	-0.2399	-0.269512	3.31e-17	435	0.00113613	TRUE	STIMATE
MT.ATP6..4508.	0.25031	0.26948	3.34e-17	436	0.00113874	TRUE	MT
GPRC5A..9052.	0.270768	0.269277	3.54e-17	437	0.00114135	TRUE	GPRC5A
TXN2..25828.	-0.277695	-0.269267	3.55e-17	438	0.00114396	TRUE	TXN2
GPR87..53836.	0.259148	0.26923	3.58e-17	439	0.00114657	TRUE	GPR87
DSP..1832.	0.260809	0.268969	3.85e-17	440	0.00114919	TRUE	DSP
PLK2..10769.	0.257076	0.268961	3.86e-17	441	0.0011518	TRUE	PLK2
GCNT2..2651.	0.271537	0.268951	3.87e-17	442	0.00115441	TRUE	GCNT2
MT.ND3..4537.	0.253813	0.268787	4.05e-17	443	0.00115702	TRUE	MT
LAD1..3898.	0.258843	0.268659	4.2e-17	444	0.00115963	TRUE	LAD1
NCKAP1..10787.	0.285718	0.268535	4.34e-17	445	0.00116224	TRUE	NCKAP1
SYT7..9066.	0.221091	0.268459	4.44e-17	446	0.00116486	TRUE	SYT7
SYS1..90196.	0.263831	0.268449	4.45e-17	447	0.00116747	TRUE	SYS1
SPINT1..6692.	0.23143	0.26838	4.53e-17	448	0.00117008	TRUE	SPINT1
CUEDC1..404093.	0.278604	0.268344	4.58e-17	449	0.00117269	TRUE	CUEDC1
SEMA4B..10509.	0.249494	0.26831	4.62e-17	450	0.0011753	TRUE	SEMA4B
JUP..3728.	0.221391	0.26817	4.8e-17	451	0.00117792	TRUE	JUP
EXOSC9..5393.	-0.286387	-0.267851	5.25e-17	452	0.00118053	TRUE	EXOSC9
ITGAL..3683.	-0.281263	-0.267849	5.25e-17	453	0.00118314	TRUE	ITGAL
KDF1..126695.	0.232492	0.267829	5.28e-17	454	0.00118575	TRUE	KDF1
RPL37A..6168.	-0.281751	-0.267798	5.32e-17	455	0.00118836	TRUE	RPL37A
BFSP1..631.	0.23129	0.26777	5.36e-17	456	0.00119097	TRUE	BFSP1
RPSA..3921.	-0.239992	-0.267746	5.4e-17	457	0.00119359	TRUE	RPSA
LY86..9450.	-0.26726	-0.267553	5.7e-17	458	0.0011962	TRUE	LY86
SNX20..124460.	-0.288393	-0.267488	5.8e-17	459	0.00119881	TRUE	SNX20
ENTPD4..9583.	-0.235737	-0.267422	5.91e-17	460	0.00120142	TRUE	ENTPD4
PARD6B..84612.	0.228451	0.267312	6.09e-17	461	0.00120403	TRUE	PARD6B
KRTAP1.5..83895.	-0.21391	-0.267287	6.13e-17	462	0.00120664	TRUE	KRTAP1
IL16..3603.	-0.269848	-0.267179	6.31e-17	463	0.00120926	TRUE	IL16
SESN1..27244.	-0.271434	-0.267078	6.49e-17	464	0.00121187	TRUE	SESN1
ACP6..51205.	0.253213	0.267053	6.54e-17	465	0.00121448	TRUE	ACP6
CACNG4..27092.	0.236459	0.26705	6.54e-17	466	0.00121709	TRUE	CACNG4
PPP3CB..5532.	-0.25336	-0.266953	6.72e-17	467	0.0012197	TRUE	PPP3CB
TENT2..167153.	-0.268042	-0.26691	6.8e-17	468	0.00122232	TRUE	TENT2
RPS8..6202.	-0.264953	-0.266881	6.85e-17	469	0.00122493	TRUE	RPS8
PLEKHO2..80301.	-0.252968	-0.266853	6.91e-17	470	0.00122754	TRUE	PLEKHO2
ITGA3..3675.	0.28212	0.266829	6.95e-17	471	0.00123015	TRUE	ITGA3
PANX2..56666.	0.234564	0.266776	7.05e-17	472	0.00123276	TRUE	PANX2
LARP7..51574.	-0.279697	-0.266752	7.1e-17	473	0.00123537	TRUE	LARP7
PLEK2..26499.	0.263749	0.266739	7.13e-17	474	0.00123799	TRUE	PLEK2
ABHD11..83451.	0.244248	0.266671	7.26e-17	475	0.0012406	TRUE	ABHD11
WFDC3..140686.	0.287253	0.26667	7.26e-17	476	0.00124321	TRUE	WFDC3
MANBAL..63905.	0.284091	0.266653	7.3e-17	477	0.00124582	TRUE	MANBAL
PDGFRB..5159.	-0.225693	-0.26658	7.44e-17	478	0.00124843	TRUE	PDGFRB
RASSF10..644943.	0.237558	0.266519	7.57e-17	479	0.00125105	TRUE	RASSF10
TCL1A..8115.	-0.257289	-0.266493	7.62e-17	480	0.00125366	TRUE	TCL1A
IRF6..3664.	0.233387	0.266477	7.66e-17	481	0.00125627	TRUE	IRF6
GIPC1..10755.	0.270707	0.266373	7.88e-17	482	0.00125888	TRUE	GIPC1
MISP..126353.	0.244669	0.266361	7.9e-17	483	0.00126149	TRUE	MISP
TMEM51..55092.	0.271174	0.266281	8.08e-17	484	0.0012641	TRUE	TMEM51
CD38..952.	-0.273815	-0.26627	8.1e-17	485	0.00126672	TRUE	CD38
ERICH1..157697.	-0.266861	-0.266175	8.32e-17	486	0.00126933	TRUE	ERICH1
HRASLS..57110.	0.248952	0.266129	8.42e-17	487	0.00127194	TRUE	HRASLS
TRIM16..10626.	0.266824	0.26612	8.45e-17	488	0.00127455	TRUE	TRIM16
GOLM1..51280.	0.260496	0.266112	8.46e-17	489	0.00127716	TRUE	GOLM1
LACTB2..51110.	0.242609	0.265887	9e-17	490	0.00127977	TRUE	LACTB2
TPD52L1..7164.	0.244237	0.265811	9.19e-17	491	0.00128239	TRUE	TPD52L1
INKA1..389119.	-0.257204	-0.2658	9.22e-17	492	0.001285	TRUE	INKA1
UBP1..7342.	-0.229704	-0.265694	9.49e-17	493	0.00128761	TRUE	UBP1
SETD2..29072.	-0.253997	-0.265631	9.66e-17	494	0.00129022	TRUE	SETD2
SPTBN2..6712.	0.197451	0.265582	9.79e-17	495	0.00129283	TRUE	SPTBN2
RASSF2..9770.	-0.278413	-0.265499	1e-16	496	0.00129545	TRUE	RASSF2
SPTSSB..165679.	0.238479	0.265424	1.02e-16	497	0.00129806	TRUE	SPTSSB
TMEM40..55287.	0.254421	0.26542	1.02e-16	498	0.00130067	TRUE	TMEM40
FLI1..2313.	-0.267065	-0.265328	1.05e-16	499	0.00130328	TRUE	FLI1
DGLUCY..80017.	-0.253267	-0.265273	1.06e-16	500	0.00130589	TRUE	DGLUCY
ERBB3..2065.	0.26296	0.265205	1.08e-16	501	0.0013085	TRUE	ERBB3
LAMA3..3909.	0.26091	0.264997	1.15e-16	502	0.00131112	TRUE	LAMA3
JADE1..79960.	-0.284363	-0.264988	1.15e-16	503	0.00131373	TRUE	JADE1
FRK..2444.	0.251584	0.264836	1.2e-16	504	0.00131634	TRUE	FRK
WDR41..55255.	-0.268431	-0.264657	1.26e-16	505	0.00131895	TRUE	WDR41
NUDT14..256281.	0.238404	0.264626	1.27e-16	506	0.00132156	TRUE	NUDT14
CRLF3..51379.	-0.231481	-0.264575	1.29e-16	507	0.00132417	TRUE	CRLF3
GPR39..2863.	0.282689	0.264467	1.33e-16	508	0.00132679	TRUE	GPR39
KIF21A..55605.	0.24409	0.264295	1.39e-16	509	0.0013294	TRUE	KIF21A
RBM47..54502.	0.238217	0.264199	1.43e-16	510	0.00133201	TRUE	RBM47
PLEKHA7..144100.	0.233217	0.264173	1.44e-16	511	0.00133462	TRUE	PLEKHA7
SEZ6L2..26470.	0.237603	0.264124	1.46e-16	512	0.00133723	TRUE	SEZ6L2
TNFAIP8L2..79626.	-0.288466	-0.264111	1.46e-16	513	0.00133985	TRUE	TNFAIP8L2
ERRFI1..54206.	0.298526	0.264105	1.46e-16	514	0.00134246	TRUE	ERRFI1
PROM2..150696.	0.254581	0.26406	1.48e-16	515	0.00134507	TRUE	PROM2
OSTC..58505.	-0.241197	-0.264046	1.49e-16	516	0.00134768	TRUE	OSTC
DUSP23..54935.	0.238252	0.264013	1.5e-16	517	0.00135029	TRUE	DUSP23
STX1A..6804.	0.256128	0.263978	1.51e-16	518	0.0013529	TRUE	STX1A
EVPL..2125.	0.23267	0.263955	1.52e-16	519	0.00135552	TRUE	EVPL
CIRBP..1153.	-0.280448	-0.263952	1.53e-16	520	0.00135813	TRUE	CIRBP
MCOLN3..55283.	0.264186	0.263935	1.53e-16	521	0.00136074	TRUE	MCOLN3
RASAL2..9462.	0.272066	0.263905	1.55e-16	522	0.00136335	TRUE	RASAL2
POR..5447.	0.260407	0.263869	1.56e-16	523	0.00136596	TRUE	POR
TRAF3IP3..80342.	-0.275099	-0.26385	1.57e-16	524	0.00136857	TRUE	TRAF3IP3
SLC6A11..6538.	0.220742	0.263835	1.57e-16	525	0.00137119	TRUE	SLC6A11
ELP6..54859.	-0.253743	-0.263815	1.58e-16	526	0.0013738	TRUE	ELP6
GNGT2..2793.	-0.245908	-0.263797	1.59e-16	527	0.00137641	TRUE	GNGT2
S1PR4..8698.	-0.273926	-0.263655	1.65e-16	528	0.00137902	TRUE	S1PR4
SLC35D1..23169.	-0.226898	-0.263588	1.68e-16	529	0.00138163	TRUE	SLC35D1
CD27..939.	-0.258666	-0.26346	1.74e-16	530	0.00138425	TRUE	CD27
MAP4K1..11184.	-0.279583	-0.263445	1.75e-16	531	0.00138686	TRUE	MAP4K1
ITGA4..3676.	-0.260087	-0.263427	1.76e-16	532	0.00138947	TRUE	ITGA4
COPS4..51138.	-0.245644	-0.263364	1.79e-16	533	0.00139208	TRUE	COPS4
TMEM270..135886.	0.21526	0.263342	1.8e-16	534	0.00139469	TRUE	TMEM270
PCSK1N..27344.	0.210532	0.263325	1.81e-16	535	0.0013973	TRUE	PCSK1N
SYCP2..10388.	0.227489	0.263291	1.82e-16	536	0.00139992	TRUE	SYCP2
TC2N..123036.	0.216181	0.263224	1.86e-16	537	0.00140253	TRUE	TC2N
PIK3C3..5289.	-0.25342	-0.263094	1.92e-16	538	0.00140514	TRUE	PIK3C3
PPP1R16B..26051.	-0.276193	-0.263061	1.94e-16	539	0.00140775	TRUE	PPP1R16B
ETFDH..2110.	-0.258029	-0.263005	1.97e-16	540	0.00141036	TRUE	ETFDH
SARNP..84324.	-0.281706	-0.262776	2.1e-16	541	0.00141297	TRUE	SARNP
LYL1..4066.	-0.274291	-0.262747	2.11e-16	542	0.00141559	TRUE	LYL1
TTC23L..153657.	0.230438	0.262662	2.16e-16	543	0.0014182	TRUE	TTC23L
EHHADH..1962.	0.259897	0.262608	2.19e-16	544	0.00142081	TRUE	EHHADH
RPL27A..6157.	-0.229712	-0.262605	2.2e-16	545	0.00142342	TRUE	RPL27A
CLDN3..1365.	0.224241	0.262518	2.25e-16	546	0.00142603	TRUE	CLDN3
C1orf115..79762.	0.215588	0.262434	2.3e-16	547	0.00142865	TRUE	C1orf115
LTA..4049.	-0.256806	-0.262345	2.36e-16	548	0.00143126	TRUE	LTA
MARC1..64757.	0.231285	0.262235	2.43e-16	549	0.00143387	TRUE	MTARC1
OCLN..100506658.	0.254843	0.261863	2.68e-16	550	0.00143648	TRUE	OCLN
CENPT..80152.	-0.268164	-0.261836	2.7e-16	551	0.00143909	TRUE	CENPT
UBE2J1..51465.	-0.261886	-0.261791	2.74e-16	552	0.0014417	TRUE	UBE2J1
BCAR1..9564.	0.271046	0.261791	2.74e-16	553	0.00144432	TRUE	BCAR1
BTK..695.	-0.28045	-0.261776	2.75e-16	554	0.00144693	TRUE	BTK
CENPC..1060.	-0.295147	-0.261739	2.77e-16	555	0.00144954	TRUE	CENPC
EGFR..1956.	0.273336	0.261661	2.83e-16	556	0.00145215	TRUE	EGFR
LRP5..4041.	0.227612	0.26159	2.89e-16	557	0.00145476	TRUE	LRP5
PPFIA1..8500.	0.239556	0.261509	2.95e-16	558	0.00145738	TRUE	PPFIA1
RPS15..6209.	-0.263077	-0.261481	2.97e-16	559	0.00145999	TRUE	RPS15
RYK..6259.	0.262174	0.261404	3.04e-16	560	0.0014626	TRUE	RYK
CEACAM21..90273.	-0.270801	-0.261343	3.09e-16	561	0.00146521	TRUE	CEACAM21
PIAS2..9063.	-0.268371	-0.261308	3.12e-16	562	0.00146782	TRUE	PIAS2
SNX25..83891.	-0.240789	-0.261239	3.17e-16	563	0.00147043	TRUE	SNX25
ACTA2..59.	-0.229228	-0.261235	3.18e-16	564	0.00147305	TRUE	ACTA2
DNTTIP1..116092.	0.264788	0.261023	3.36e-16	565	0.00147566	TRUE	DNTTIP1
HID1..283987.	0.219237	0.260824	3.55e-16	566	0.00147827	TRUE	HID1
IL13RA1..3597.	0.279375	0.260822	3.55e-16	567	0.00148088	TRUE	IL13RA1
SCEL..8796.	0.236278	0.260638	3.73e-16	568	0.00148349	TRUE	SCEL
KDM8..79831.	-0.26375	-0.260549	3.82e-16	569	0.0014861	TRUE	KDM8
HELQ..113510.	-0.256785	-0.260378	4e-16	570	0.00148872	TRUE	HELQ
EPS8L1..54869.	0.21007	0.26022	4.17e-16	571	0.00149133	TRUE	EPS8L1
DIMT1..27292.	-0.239218	-0.260117	4.29e-16	572	0.00149394	TRUE	DIMT1
UHRF2..115426.	-0.25001	-0.260055	4.36e-16	573	0.00149655	TRUE	UHRF2
FXYD3..5349.	0.24972	0.260025	4.39e-16	574	0.00149916	TRUE	FXYD3
PDHB..5162.	-0.243934	-0.25998	4.45e-16	575	0.00150178	TRUE	PDHB
RIPOR2..9750.	-0.247296	-0.259954	4.48e-16	576	0.00150439	TRUE	RIPOR2
EIF4E..1977.	-0.277571	-0.259839	4.62e-16	577	0.001507	TRUE	EIF4E
MED18..54797.	-0.244434	-0.259811	4.65e-16	578	0.00150961	TRUE	MED18
HSPB7..27129.	-0.223106	-0.259762	4.71e-16	579	0.00151222	TRUE	HSPB7
CTSD..1509.	0.265051	0.259737	4.74e-16	580	0.00151483	TRUE	CTSD
MON1A..84315.	-0.242689	-0.259702	4.79e-16	581	0.00151745	TRUE	MON1A
HCLS1..3059.	-0.271483	-0.259625	4.89e-16	582	0.00152006	TRUE	HCLS1
NECTIN4..81607.	0.233755	0.259617	4.9e-16	583	0.00152267	TRUE	NECTIN4
STAP2..55620.	0.241808	0.2596	4.92e-16	584	0.00152528	TRUE	STAP2
OSGIN1..29948.	0.27642	0.259549	4.99e-16	585	0.00152789	TRUE	OSGIN1
SYT17..51760.	0.223317	0.259544	4.99e-16	586	0.00153051	TRUE	SYT17
CELF2..10659.	-0.274063	-0.259514	5.03e-16	587	0.00153312	TRUE	CELF2
RHOG..391.	-0.252169	-0.259427	5.15e-16	588	0.00153573	TRUE	RHOG
COBL..23242.	0.22298	0.259196	5.48e-16	589	0.00153834	TRUE	COBL
C1orf116..79098.	0.232023	0.259155	5.54e-16	590	0.00154095	TRUE	C1orf116
KIAA1217..56243.	0.263693	0.25913	5.57e-16	591	0.00154356	TRUE	KIAA1217
PFKFB2..5208.	0.224227	0.25911	5.6e-16	592	0.00154618	TRUE	PFKFB2
FGF7..2252.	-0.204557	-0.259069	5.67e-16	593	0.00154879	TRUE	FGF7
IGSF9..57549.	0.220311	0.25848	6.62e-16	594	0.0015514	TRUE	IGSF9
EPPK1..83481.	0.223739	0.258382	6.8e-16	595	0.00155401	TRUE	EPPK1
GNAI2..2771.	-0.227595	-0.258353	6.85e-16	596	0.00155662	TRUE	GNAI2
FAM83D..81610.	0.269169	0.258182	7.17e-16	597	0.00155923	TRUE	FAM83D
CSF2RB..1439.	-0.265295	-0.258159	7.21e-16	598	0.00156185	TRUE	CSF2RB
SEMA3E..9723.	0.25513	0.258153	7.22e-16	599	0.00156446	TRUE	SEMA3E
KCTD20..222658.	-0.25603	-0.257861	7.81e-16	600	0.00156707	TRUE	KCTD20
BARX2..8538.	0.212429	0.257777	7.98e-16	601	0.00156968	TRUE	BARX2
CHMP7..91782.	-0.258669	-0.257775	7.98e-16	602	0.00157229	TRUE	CHMP7
NCF4..4689.	-0.272441	-0.257772	7.99e-16	603	0.00157491	TRUE	NCF4
SLAMF1..6504.	-0.251956	-0.257689	8.17e-16	604	0.00157752	TRUE	SLAMF1
MRGBP..55257.	0.259382	0.257673	8.2e-16	605	0.00158013	TRUE	MRGBP
MZB1..51237.	-0.27256	-0.257625	8.31e-16	606	0.00158274	TRUE	MZB1
NICN1..84276.	-0.259221	-0.257347	8.94e-16	607	0.00158535	TRUE	NICN1
LPXN..9404.	-0.235435	-0.257325	8.99e-16	608	0.00158796	TRUE	LPXN
FAS..355.	-0.21696	-0.257103	9.53e-16	609	0.00159058	TRUE	FAS
HCST..10870.	-0.284975	-0.257076	9.6e-16	610	0.00159319	TRUE	HCST
PLEKHA6..22874.	0.229022	0.256958	9.91e-16	611	0.0015958	TRUE	PLEKHA6
HMGB3..3149.	0.230412	0.256924	1e-15	612	0.00159841	TRUE	HMGB3
LSP1..4046.	-0.256643	-0.256857	1.02e-15	613	0.00160102	TRUE	LSP1
TSEN34..79042.	0.260845	0.256836	1.02e-15	614	0.00160364	TRUE	TSEN34
PON2..5445.	0.254889	0.256792	1.03e-15	615	0.00160625	TRUE	PON2
LTBP3..4054.	0.197708	0.256774	1.04e-15	616	0.00160886	TRUE	LTBP3
SLC25A6..293.	-0.27161	-0.256763	1.04e-15	617	0.00161147	TRUE	SLC25A6
CXorf65..158830.	-0.252096	-0.25667	1.07e-15	618	0.00161408	TRUE	CXorf65
ATF5..22809.	-0.262	-0.256601	1.09e-15	619	0.0016167	TRUE	ATF5
PLEC..5339.	0.260146	0.256534	1.11e-15	620	0.00161931	TRUE	PLEC
PARD3..56288.	0.26113	0.256485	1.12e-15	621	0.00162192	TRUE	PARD3
SERTAD4..56256.	0.245146	0.256385	1.15e-15	622	0.00162453	TRUE	SERTAD4
FAXC..84553.	0.230379	0.256385	1.15e-15	623	0.00162714	TRUE	FAXC
C4orf46..201725.	-0.262299	-0.256272	1.19e-15	624	0.00162975	TRUE	C4orf46
SLC25A38..54977.	-0.228004	-0.256235	1.2e-15	625	0.00163236	TRUE	SLC25A38
FGF12..2257.	0.228366	0.256232	1.2e-15	626	0.00163498	TRUE	FGF12
LIMCH1..22998.	0.255448	0.256201	1.21e-15	627	0.00163759	TRUE	LIMCH1
DMKN..93099.	0.235344	0.256162	1.22e-15	628	0.0016402	TRUE	DMKN
NDUFS6..4726.	0.23315	0.256054	1.26e-15	629	0.00164281	TRUE	NDUFS6
GPR65..8477.	-0.24278	-0.255995	1.28e-15	630	0.00164542	TRUE	GPR65
WDR7..23335.	-0.261996	-0.255626	1.41e-15	631	0.00164804	TRUE	WDR7
DMRTA1..63951.	0.243183	0.255612	1.41e-15	632	0.00165065	TRUE	DMRTA1
PTK6..5753.	0.228332	0.255599	1.42e-15	633	0.00165326	TRUE	PTK6
PC..5091.	0.256646	0.255562	1.43e-15	634	0.00165587	TRUE	PC
ANXA8L1..728113.	0.251489	0.255562	1.43e-15	635	0.00165848	TRUE	ANXA8L1
SESN2..83667.	-0.229827	-0.255539	1.44e-15	636	0.0016611	TRUE	SESN2
PRSS8..5652.	0.223403	0.255532	1.44e-15	637	0.00166371	TRUE	PRSS8
ALDH3A2..224.	0.246819	0.255403	1.49e-15	638	0.00166632	TRUE	ALDH3A2
CARD14..79092.	0.235748	0.25531	1.53e-15	639	0.00166893	TRUE	CARD14
CYTIP..9595.	-0.251954	-0.255282	1.54e-15	640	0.00167154	TRUE	CYTIP
CNOT6L..246175.	-0.26696	-0.255276	1.54e-15	641	0.00167415	TRUE	CNOT6L
INTS10..55174.	-0.273092	-0.255158	1.59e-15	642	0.00167677	TRUE	INTS10
LRRC2..79442.	-0.222606	-0.255146	1.59e-15	643	0.00167938	TRUE	LRRC2
LRRC1..55227.	0.249223	0.255051	1.63e-15	644	0.00168199	TRUE	LRRC1
EDA2R..60401.	-0.230909	-0.255035	1.64e-15	645	0.0016846	TRUE	EDA2R
ANKRD18A..253650.	0.222131	0.254828	1.73e-15	646	0.00168721	TRUE	ANKRD18A
MICALL2..79778.	0.251581	0.254809	1.74e-15	647	0.00168982	TRUE	MICALL2
ADGRF1..266977.	0.237206	0.254804	1.74e-15	648	0.00169244	TRUE	ADGRF1
NSDHL..50814.	0.253144	0.254794	1.75e-15	649	0.00169505	TRUE	NSDHL
VGLL1..51442.	0.241144	0.254763	1.76e-15	650	0.00169766	TRUE	VGLL1
HES4..57801.	0.228976	0.254739	1.77e-15	651	0.00170027	TRUE	HES4
QRICH1..54870.	-0.242447	-0.254682	1.8e-15	652	0.00170288	TRUE	QRICH1
METTL14..57721.	-0.274911	-0.254412	1.93e-15	653	0.0017055	TRUE	METTL14
DCP1B..196513.	-0.250094	-0.254299	1.99e-15	654	0.00170811	TRUE	DCP1B
TCF3..6929.	-0.28152	-0.254288	1.99e-15	655	0.00171072	TRUE	TCF3
ASPN..54829.	-0.224683	-0.25427	2e-15	656	0.00171333	TRUE	ASPN
PXN..5829.	0.269789	0.254171	2.06e-15	657	0.00171594	TRUE	PXN
ADA2..51816.	-0.268778	-0.25413	2.08e-15	658	0.00171855	TRUE	ADA2
GALE..2582.	0.259828	0.254128	2.08e-15	659	0.00172117	TRUE	GALE
SYNE3..161176.	-0.241969	-0.254051	2.12e-15	660	0.00172378	TRUE	SYNE3
VWDE..221806.	0.213485	0.254023	2.14e-15	661	0.00172639	TRUE	VWDE
EPHA2..1969.	0.278658	0.25402	2.14e-15	662	0.001729	TRUE	EPHA2
C6orf132..647024.	0.217195	0.254017	2.14e-15	663	0.00173161	TRUE	C6orf132
CLASP2..23122.	-0.256165	-0.253981	2.16e-15	664	0.00173423	TRUE	CLASP2
ELAC1..55520.	-0.256394	-0.253856	2.23e-15	665	0.00173684	TRUE	ELAC1
TLR10..81793.	-0.248276	-0.253828	2.25e-15	666	0.00173945	TRUE	TLR10
ATP5F1A..498.	-0.270801	-0.253741	2.3e-15	667	0.00174206	TRUE	ATP5F1A
C1GALT1C1L..728819.	0.238721	0.253676	2.34e-15	668	0.00174467	TRUE	C1GALT1C1L
TTC24..164118.	-0.259229	-0.253675	2.34e-15	669	0.00174728	TRUE	TTC24
FAM78A..286336.	-0.274763	-0.253586	2.39e-15	670	0.0017499	TRUE	FAM78A
TNKS1BP1..85456.	0.235596	0.253579	2.4e-15	671	0.00175251	TRUE	TNKS1BP1
PTPN22..26191.	-0.237181	-0.253475	2.46e-15	672	0.00175512	TRUE	PTPN22
ZNF488..118738.	0.243712	0.253424	2.5e-15	673	0.00175773	TRUE	ZNF488
CD37..951.	-0.268285	-0.253415	2.5e-15	674	0.00176034	TRUE	CD37
PTPRK..5796.	0.275684	0.253409	2.51e-15	675	0.00176295	TRUE	PTPRK
GRTP1..79774.	0.210797	0.253391	2.52e-15	676	0.00176557	TRUE	GRTP1
LTBR..4055.	0.268095	0.253355	2.54e-15	677	0.00176818	TRUE	LTBR
ROMO1..140823.	0.234157	0.25324	2.62e-15	678	0.00177079	TRUE	ROMO1
IQCE..23288.	0.20863	0.253203	2.64e-15	679	0.0017734	TRUE	IQCE
PYHIN1..149628.	-0.244502	-0.253201	2.64e-15	680	0.00177601	TRUE	PYHIN1
HOOK1..51361.	0.205009	0.253111	2.71e-15	681	0.00177863	TRUE	HOOK1
OBSL1..23363.	0.235319	0.253082	2.73e-15	682	0.00178124	TRUE	OBSL1
RPL11..6135.	-0.248946	-0.253039	2.76e-15	683	0.00178385	TRUE	RPL11
ARHGAP8..23779.	0.215602	0.252862	2.89e-15	684	0.00178646	TRUE	ARHGAP8
BLCAP..10904.	0.245935	0.252455	3.21e-15	685	0.00178907	TRUE	BLCAP
FRG1..2483.	-0.250032	-0.252393	3.26e-15	686	0.00179168	TRUE	FRG1
NAXE..128240.	0.21317	0.25234	3.3e-15	687	0.0017943	TRUE	NAXE
INHA..3623.	0.21782	0.252269	3.37e-15	688	0.00179691	TRUE	INHA
FHDC1..85462.	0.215093	0.252153	3.47e-15	689	0.00179952	TRUE	FHDC1
ARPC1A..10552.	0.270405	0.252145	3.48e-15	690	0.00180213	TRUE	ARPC1A
SCIMP..388325.	-0.242502	-0.251997	3.61e-15	691	0.00180474	TRUE	SCIMP
STAC3..246329.	-0.262846	-0.251988	3.62e-15	692	0.00180736	TRUE	STAC3
SPI1..6688.	-0.268973	-0.251931	3.67e-15	693	0.00180997	TRUE	SPI1
LONP1..9361.	-0.266306	-0.251924	3.68e-15	694	0.00181258	TRUE	LONP1
PVR..5817.	0.261654	0.251704	3.89e-15	695	0.00181519	TRUE	PVR
GNG4..2786.	0.221166	0.251672	3.93e-15	696	0.0018178	TRUE	GNG4
IRAK4..51135.	-0.235208	-0.251627	3.97e-15	697	0.00182041	TRUE	IRAK4
OSBPL2..9885.	0.258732	0.251594	4.01e-15	698	0.00182303	TRUE	OSBPL2
PSMA7..5688.	0.283474	0.251541	4.06e-15	699	0.00182564	TRUE	PSMA7
NAA80..24142.	-0.241677	-0.251491	4.11e-15	700	0.00182825	TRUE	NAA80
VPREB3..29802.	-0.239082	-0.251482	4.12e-15	701	0.00183086	TRUE	VPREB3
EVI2B..2124.	-0.251013	-0.251321	4.3e-15	702	0.00183347	TRUE	EVI2B
STX3..6809.	0.246127	0.251256	4.37e-15	703	0.00183608	TRUE	STX3
L1CAM..3897.	0.236463	0.25123	4.4e-15	704	0.0018387	TRUE	L1CAM
INAVA..55765.	0.227154	0.251224	4.41e-15	705	0.00184131	TRUE	INAVA
C3orf14..57415.	0.242591	0.25122	4.41e-15	706	0.00184392	TRUE	C3orf14
SPINT2..10653.	0.199052	0.251197	4.44e-15	707	0.00184653	TRUE	SPINT2
PACSIN3..29763.	0.252506	0.251181	4.45e-15	708	0.00184914	TRUE	PACSIN3
SEPT6..23157.	-0.268715	-0.251037	4.62e-15	709	0.00185176	TRUE	SEPTIN6
RAB25..57111.	0.222684	0.251029	4.63e-15	710	0.00185437	TRUE	RAB25
SLC44A3..126969.	0.244503	0.250945	4.73e-15	711	0.00185698	TRUE	SLC44A3
ARHGAP29..9411.	0.271706	0.250749	4.98e-15	712	0.00185959	TRUE	ARHGAP29
CNTNAP3..79937.	0.257465	0.250737	4.99e-15	713	0.0018622	TRUE	CNTNAP3
SNCG..6623.	0.249101	0.250669	5.08e-15	714	0.00186481	TRUE	SNCG
SH3BGRL..6451.	-0.23486	-0.250637	5.12e-15	715	0.00186743	TRUE	SH3BGRL
CXADR..1525.	0.231683	0.250578	5.2e-15	716	0.00187004	TRUE	CXADR
LAPTM5..7805.	-0.249236	-0.250412	5.42e-15	717	0.00187265	TRUE	LAPTM5
DUSP3..1845.	0.259455	0.250408	5.43e-15	718	0.00187526	TRUE	DUSP3
ANKRD44..91526.	-0.252133	-0.250364	5.49e-15	719	0.00187787	TRUE	ANKRD44
GOLT1A..127845.	0.217358	0.250295	5.59e-15	720	0.00188049	TRUE	GOLT1A
CSK..1445.	-0.276979	-0.250288	5.6e-15	721	0.0018831	TRUE	CSK
MAP3K21..84451.	0.210712	0.250254	5.65e-15	722	0.00188571	TRUE	MAP3K21
TMC4..147798.	0.21841	0.25025	5.65e-15	723	0.00188832	TRUE	TMC4
AGAP1..116987.	0.235758	0.250245	5.66e-15	724	0.00189093	TRUE	AGAP1
RPL26..6154.	-0.226554	-0.25021	5.71e-15	725	0.00189354	TRUE	RPL26
C11orf80..79703.	0.223663	0.25019	5.74e-15	726	0.00189616	TRUE	C11orf80
MORN2..729967.	0.24635	0.250156	5.79e-15	727	0.00189877	TRUE	MORN2
FGR..2268.	-0.24833	-0.249999	6.03e-15	728	0.00190138	TRUE	FGR
PIK3CD..5293.	-0.215107	-0.249953	6.1e-15	729	0.00190399	TRUE	PIK3CD
MS4A1..931.	-0.237821	-0.249886	6.21e-15	730	0.0019066	TRUE	MS4A1
RAB33A..9363.	-0.273601	-0.249794	6.35e-15	731	0.00190921	TRUE	RAB33A
NFATC3..4775.	-0.269838	-0.24977	6.39e-15	732	0.00191183	TRUE	NFATC3
FCHSD2..9873.	-0.262254	-0.249565	6.74e-15	733	0.00191444	TRUE	FCHSD2
TANGO6..79613.	-0.214784	-0.24952	6.81e-15	734	0.00191705	TRUE	TANGO6
FAM129B..64855.	0.26765	0.249512	6.83e-15	735	0.00191966	TRUE	FAM129B
PPIL3..53938.	-0.251312	-0.249472	6.9e-15	736	0.00192227	TRUE	PPIL3
OSBPL8..114882.	-0.246174	-0.249451	6.94e-15	737	0.00192489	TRUE	OSBPL8
PIK3R5..23533.	-0.248308	-0.249441	6.95e-15	738	0.0019275	TRUE	PIK3R5
NCF1..653361.	-0.258235	-0.249389	7.05e-15	739	0.00193011	TRUE	NCF1
ARHGEF5..7984.	0.253158	0.249378	7.07e-15	740	0.00193272	TRUE	ARHGEF5
THAP10..56906.	0.239671	0.249276	7.25e-15	741	0.00193533	TRUE	THAP10
JAK3..3718.	-0.265395	-0.249165	7.46e-15	742	0.00193794	TRUE	JAK3
RPL21..6144.	-0.242617	-0.249115	7.55e-15	743	0.00194056	TRUE	RPL21
MTUS1..57509.	0.226007	0.248912	7.96e-15	744	0.00194317	TRUE	MTUS1
NPIPA1..9284.	-0.252947	-0.248806	8.17e-15	745	0.00194578	TRUE	NPIPA1
ANKRD18B..441459.	0.236469	0.248753	8.28e-15	746	0.00194839	TRUE	ANKRD18B
TMEM189..387521.	0.277616	0.248748	8.3e-15	747	0.001951	TRUE	TMEM189
FCRLA..84824.	-0.226604	-0.248683	8.43e-15	748	0.00195362	TRUE	FCRLA
ATP9A..10079.	0.239096	0.248661	8.48e-15	749	0.00195623	TRUE	ATP9A
PI16..221476.	-0.226503	-0.248453	8.94e-15	750	0.00195884	TRUE	PI16
RNF223..401934.	0.215344	0.248428	9e-15	751	0.00196145	TRUE	RNF223
PARVG..64098.	-0.272986	-0.248371	9.13e-15	752	0.00196406	TRUE	PARVG
FAM174B..400451.	0.220857	0.248336	9.21e-15	753	0.00196667	TRUE	FAM174B
GNGT1..2792.	0.223113	0.248313	9.26e-15	754	0.00196928	TRUE	GNGT1
FAM131C..348487.	0.221316	0.24824	9.44e-15	755	0.0019719	TRUE	FAM131C
ASPHD2..57168.	-0.235914	-0.248232	9.45e-15	756	0.00197451	TRUE	ASPHD2
GCSAM..257144.	-0.241326	-0.248205	9.52e-15	757	0.00197712	TRUE	GCSAM
PPP1R16A..84988.	0.181841	0.247879	1.03e-14	758	0.00197973	TRUE	PPP1R16A
PQLC1..80148.	-0.253301	-0.247875	1.04e-14	759	0.00198234	TRUE	PQLC1
ZAP70..7535.	-0.247617	-0.247793	1.06e-14	760	0.00198496	TRUE	ZAP70
PTGES..9536.	0.242432	0.247789	1.06e-14	761	0.00198757	TRUE	PTGES
F2RL1..2150.	0.266591	0.24774	1.07e-14	762	0.00199018	TRUE	F2RL1
MTG2..26164.	0.266896	0.247731	1.07e-14	763	0.00199279	TRUE	MTG2
RFXAP..5994.	-0.256726	-0.247595	1.11e-14	764	0.0019954	TRUE	RFXAP
ALDH1A3..220.	0.241496	0.247579	1.12e-14	765	0.00199802	TRUE	ALDH1A3
ANXA3..306.	0.235212	0.247551	1.12e-14	766	0.00200063	TRUE	ANXA3
LFNG..3955.	0.229959	0.247527	1.13e-14	767	0.00200324	TRUE	LFNG
SNAPC3..6619.	-0.23644	-0.247435	1.16e-14	768	0.00200585	TRUE	SNAPC3
NEK1..4750.	-0.248315	-0.247364	1.18e-14	769	0.00200846	TRUE	NEK1
TRAPPC11..60684.	-0.264512	-0.24732	1.19e-14	770	0.00201107	TRUE	TRAPPC11
EPS15..2060.	-0.239766	-0.247279	1.2e-14	771	0.00201369	TRUE	EPS15
RBFA..79863.	-0.280387	-0.247259	1.21e-14	772	0.0020163	TRUE	RBFA
ADGRG6..57211.	0.229287	0.247253	1.21e-14	773	0.00201891	TRUE	ADGRG6
ANXA9..8416.	0.210324	0.247161	1.24e-14	774	0.00202152	TRUE	ANXA9
EPG5..57724.	-0.233564	-0.247138	1.25e-14	775	0.00202413	TRUE	EPG5
VWCE..220001.	-0.255582	-0.24705	1.28e-14	776	0.00202674	TRUE	VWCE
FNDC9..408263.	-0.245033	-0.247047	1.28e-14	777	0.00202936	TRUE	FNDC9
PLEKHA5..54477.	0.270806	0.246993	1.29e-14	778	0.00203197	TRUE	PLEKHA5
INTS12..57117.	-0.267113	-0.246862	1.34e-14	779	0.00203458	TRUE	INTS12
CCNDBP1..23582.	-0.24011	-0.24685	1.34e-14	780	0.00203719	TRUE	CCNDBP1
ENPP5..59084.	0.192546	0.246844	1.34e-14	781	0.0020398	TRUE	ENPP5
MLPH..79083.	0.241502	0.246824	1.35e-14	782	0.00204242	TRUE	MLPH
TDRKH..11022.	0.203404	0.246808	1.36e-14	783	0.00204503	TRUE	TDRKH
GSDMC..56169.	0.24348	0.246675	1.4e-14	784	0.00204764	TRUE	GSDMC
CHMP4B..128866.	0.245157	0.246359	1.52e-14	785	0.00205025	TRUE	CHMP4B
HEMK1..51409.	-0.214528	-0.246342	1.52e-14	786	0.00205286	TRUE	HEMK1
EIF6..3692.	0.265173	0.24633	1.53e-14	787	0.00205547	TRUE	EIF6
RNF123..63891.	-0.231473	-0.24632	1.53e-14	788	0.00205809	TRUE	RNF123
TRIM29..23650.	0.23395	0.24622	1.57e-14	789	0.0020607	TRUE	TRIM29
PHKA1..5255.	0.226428	0.246181	1.59e-14	790	0.00206331	TRUE	PHKA1
ATF4..468.	-0.231222	-0.246052	1.64e-14	791	0.00206592	TRUE	ATF4
ZNF223..7766.	0.216601	0.245994	1.66e-14	792	0.00206853	TRUE	ZNF223
TTC39A..22996.	0.208489	0.245958	1.68e-14	793	0.00207114	TRUE	TTC39A
RBBP8NL..140893.	0.233175	0.24595	1.68e-14	794	0.00207376	TRUE	RBBP8NL
PODN..127435.	-0.227831	-0.245945	1.68e-14	795	0.00207637	TRUE	PODN
PIGU..128869.	0.24786	0.24593	1.69e-14	796	0.00207898	TRUE	PIGU
QARS..5859.	-0.225897	-0.245928	1.69e-14	797	0.00208159	TRUE	QARS
ARFGEF3..57221.	0.218478	0.245805	1.74e-14	798	0.0020842	TRUE	ARFGEF3
FOXN3..1112.	-0.220574	-0.245769	1.76e-14	799	0.00208682	TRUE	FOXN3
LAMB1..3912.	0.272804	0.245682	1.8e-14	800	0.00208943	TRUE	LAMB1
PPM1K..152926.	-0.249247	-0.245586	1.84e-14	801	0.00209204	TRUE	PPM1K
EMP2..2013.	0.238683	0.245539	1.86e-14	802	0.00209465	TRUE	EMP2
RFX7..64864.	-0.269742	-0.245515	1.88e-14	803	0.00209726	TRUE	RFX7
SEC24B..10427.	-0.237385	-0.245341	1.96e-14	804	0.00209988	TRUE	SEC24B
PERM1..84808.	0.238865	0.245256	2e-14	805	0.00210249	TRUE	PERM1
ARHGAP30..257106.	-0.273949	-0.245224	2.02e-14	806	0.0021051	TRUE	ARHGAP30
TMA7..51372.	-0.239424	-0.245223	2.02e-14	807	0.00210771	TRUE	TMA7
TSPOAP1..9256.	-0.272458	-0.24522	2.02e-14	808	0.00211032	TRUE	TSPOAP1
ADAM15..8751.	0.222809	0.245191	2.03e-14	809	0.00211293	TRUE	ADAM15
CDC42EP4..23580.	0.244546	0.245112	2.07e-14	810	0.00211554	TRUE	CDC42EP4
RRM2B..50484.	-0.234089	-0.245109	2.08e-14	811	0.00211816	TRUE	RRM2B
OSER1..51526.	0.261393	0.245087	2.09e-14	812	0.00212077	TRUE	OSER1
ARL4A..10124.	0.222577	0.245057	2.1e-14	813	0.00212338	TRUE	ARL4A
COX7A1..1346.	-0.215998	-0.245022	2.12e-14	814	0.00212599	TRUE	COX7A1
ARHGAP17..55114.	-0.232165	-0.244987	2.14e-14	815	0.0021286	TRUE	ARHGAP17
ANXA8..653145.	0.244923	0.244982	2.14e-14	816	0.00213122	TRUE	ANXA8
RHOV..171177.	0.207628	0.244951	2.16e-14	817	0.00213383	TRUE	RHOV
AGR2..10551.	0.230493	0.244869	2.2e-14	818	0.00213644	TRUE	AGR2
GALNT3..2591.	0.23844	0.244772	2.26e-14	819	0.00213905	TRUE	GALNT3
ACKR4..51554.	-0.215287	-0.24469	2.31e-14	820	0.00214166	TRUE	ACKR4
FBXW7..55294.	-0.263302	-0.244674	2.31e-14	821	0.00214428	TRUE	FBXW7
ASPH..444.	0.264252	0.244664	2.32e-14	822	0.00214689	TRUE	ASPH
MYO6..4646.	0.238979	0.244661	2.32e-14	823	0.0021495	TRUE	MYO6
CCDC85C..317762.	0.231222	0.244619	2.35e-14	824	0.00215211	TRUE	CCDC85C
CCDC69..26112.	-0.260399	-0.244521	2.4e-14	825	0.00215472	TRUE	CCDC69
RHOD..29984.	0.219109	0.244473	2.43e-14	826	0.00215733	TRUE	RHOD
PAIP1..10605.	0.232586	0.244464	2.44e-14	827	0.00215995	TRUE	PAIP1
VTCN1..79679.	0.233371	0.24446	2.44e-14	828	0.00216256	TRUE	VTCN1
TMEM125..128218.	0.209612	0.244325	2.53e-14	829	0.00216517	TRUE	TMEM125
DOT1L..84444.	-0.266103	-0.244244	2.58e-14	830	0.00216778	TRUE	DOT1L
DAGLA..747.	0.209897	0.244238	2.58e-14	831	0.00217039	TRUE	DAGLA
RBPJ..3516.	-0.222667	-0.244174	2.62e-14	832	0.002173	TRUE	RBPJ
MAGIX..79917.	0.227256	0.244023	2.72e-14	833	0.00217562	TRUE	MAGIX
SMIM22..440335.	0.218919	0.244021	2.72e-14	834	0.00217823	TRUE	SMIM22
C1orf210..149466.	0.205613	0.244011	2.73e-14	835	0.00218084	TRUE	C1orf210
CLU..1191.	0.240818	0.243954	2.77e-14	836	0.00218345	TRUE	CLU
SVIL..6840.	0.245853	0.243935	2.78e-14	837	0.00218606	TRUE	SVIL
NHLRC4..283948.	-0.271226	-0.243828	2.86e-14	838	0.00218868	TRUE	NHLRC4
RPS23..6228.	-0.253353	-0.243666	2.98e-14	839	0.00219129	TRUE	RPS23
DCP1A..55802.	-0.232382	-0.243661	2.98e-14	840	0.0021939	TRUE	DCP1A
FAM189A2..9413.	0.230577	0.243622	3.01e-14	841	0.00219651	TRUE	FAM189A2
SPIB..6689.	-0.243364	-0.243586	3.04e-14	842	0.00219912	TRUE	SPIB
CAMTA2..23125.	-0.215047	-0.243485	3.11e-14	843	0.00220173	TRUE	CAMTA2
RPS13..6207.	-0.235731	-0.243349	3.22e-14	844	0.00220435	TRUE	RPS13
ARL14..80117.	0.254598	0.243333	3.23e-14	845	0.00220696	TRUE	ARL14
STK17B..9262.	-0.22096	-0.243333	3.23e-14	846	0.00220957	TRUE	STK17B
PBRM1..55193.	-0.222621	-0.243179	3.36e-14	847	0.00221218	TRUE	PBRM1
ADGRV1..84059.	0.216219	0.243158	3.38e-14	848	0.00221479	TRUE	ADGRV1
CCNI..10983.	-0.247844	-0.243056	3.46e-14	849	0.0022174	TRUE	CCNI
RAC1..5879.	0.261056	0.243037	3.48e-14	850	0.00222002	TRUE	RAC1
TTC22..55001.	0.225214	0.242954	3.55e-14	851	0.00222263	TRUE	TTC22
HTATIP2..10553.	0.234484	0.242933	3.57e-14	852	0.00222524	TRUE	HTATIP2
ZNF333..84449.	-0.243344	-0.242869	3.63e-14	853	0.00222785	TRUE	ZNF333
GMIP..51291.	-0.256579	-0.242867	3.63e-14	854	0.00223046	TRUE	GMIP
MT.CYB..4519.	0.230197	0.242848	3.65e-14	855	0.00223308	TRUE	MT
CDC42BPB..9578.	0.241934	0.242672	3.81e-14	856	0.00223569	TRUE	CDC42BPB
BTC..685.	0.222772	0.242517	3.96e-14	857	0.0022383	TRUE	BTC
HSPB6..126393.	-0.205733	-0.242491	3.98e-14	858	0.00224091	TRUE	HSPB6
SLC25A42..284439.	-0.253884	-0.242444	4.03e-14	859	0.00224352	TRUE	SLC25A42
NKX2.8..26257.	0.23332	0.242443	4.03e-14	860	0.00224613	TRUE	NKX2
PRRG2..5639.	0.204594	0.242413	4.06e-14	861	0.00224875	TRUE	PRRG2
DST..667.	0.252413	0.242369	4.1e-14	862	0.00225136	TRUE	DST
ARHGEF35..445328.	0.241522	0.242329	4.14e-14	863	0.00225397	TRUE	ARHGEF35
TNNT1..7138.	0.219167	0.242297	4.18e-14	864	0.00225658	TRUE	TNNT1
TNS3..64759.	0.255958	0.242293	4.18e-14	865	0.00225919	TRUE	TNS3
ALKBH7..84266.	-0.246083	-0.24219	4.29e-14	866	0.0022618	TRUE	ALKBH7
PHF7..51533.	-0.245234	-0.242167	4.31e-14	867	0.00226442	TRUE	PHF7
VPREB1..7441.	-0.232077	-0.242148	4.33e-14	868	0.00226703	TRUE	VPREB1
ESPN..83715.	0.2056	0.242132	4.35e-14	869	0.00226964	TRUE	ESPN
TRPV2..51393.	-0.203902	-0.242108	4.38e-14	870	0.00227225	TRUE	TRPV2
CTNNA1..1495.	0.259073	0.242096	4.39e-14	871	0.00227486	TRUE	CTNNA1
CD24..100133941.	0.228358	0.242079	4.41e-14	872	0.00227748	TRUE	CD24
SPIN3..169981.	0.2091	0.24206	4.43e-14	873	0.00228009	TRUE	SPIN3
SLC2A1..6513.	0.22264	0.241803	4.72e-14	874	0.0022827	TRUE	SLC2A1
SLC4A11..83959.	0.211538	0.241784	4.74e-14	875	0.00228531	TRUE	SLC4A11
PLEKHO1..51177.	-0.223003	-0.241733	4.8e-14	876	0.00228792	TRUE	PLEKHO1
RPL18A..6142.	-0.242913	-0.241631	4.92e-14	877	0.00229053	TRUE	RPL18A
PBX1..5087.	0.207378	0.241515	5.06e-14	878	0.00229315	TRUE	PBX1
TMEM220..388335.	-0.217317	-0.241407	5.2e-14	879	0.00229576	TRUE	TMEM220
CNIH4..29097.	0.246552	0.241328	5.3e-14	880	0.00229837	TRUE	CNIH4
CARMIL1..55604.	0.232411	0.241321	5.31e-14	881	0.00230098	TRUE	CARMIL1
DHX32..55760.	0.230261	0.241242	5.42e-14	882	0.00230359	TRUE	DHX32
SACS..26278.	-0.209932	-0.241209	5.46e-14	883	0.00230621	TRUE	SACS
MAMDC4..158056.	-0.276902	-0.241171	5.51e-14	884	0.00230882	TRUE	MAMDC4
TNK1..8711.	0.208135	0.24117	5.51e-14	885	0.00231143	TRUE	TNK1
NR2F6..2063.	0.21726	0.241157	5.53e-14	886	0.00231404	TRUE	NR2F6
CHRM2..1129.	-0.218404	-0.241106	5.6e-14	887	0.00231665	TRUE	CHRM2
PNRC2..55629.	-0.244206	-0.241092	5.62e-14	888	0.00231927	TRUE	PNRC2
KLK6..5653.	0.228637	0.240993	5.76e-14	889	0.00232188	TRUE	KLK6
CAMSAP3..57662.	0.196347	0.240926	5.85e-14	890	0.00232449	TRUE	CAMSAP3
POFUT1..23509.	0.252902	0.240867	5.94e-14	891	0.0023271	TRUE	POFUT1
LILRB1..10859.	-0.240114	-0.240828	6e-14	892	0.00232971	TRUE	LILRB1
SRXN1..140809.	0.249348	0.240783	6.06e-14	893	0.00233232	TRUE	SRXN1
FAM110C..642273.	0.198644	0.240779	6.07e-14	894	0.00233493	TRUE	FAM110C
CYP1A1..1543.	0.226083	0.240683	6.21e-14	895	0.00233755	TRUE	CYP1A1
RHOBTB3..22836.	0.238667	0.240676	6.22e-14	896	0.00234016	TRUE	RHOBTB3
RNF114..55905.	0.234389	0.240642	6.28e-14	897	0.00234277	TRUE	RNF114
MRPL54..116541.	-0.243715	-0.24064	6.28e-14	898	0.00234538	TRUE	MRPL54
NKX1.2..390010.	0.219655	0.240557	6.41e-14	899	0.00234799	TRUE	NKX1
MOB1B..92597.	-0.229836	-0.240375	6.7e-14	900	0.00235061	TRUE	MOB1B
SGSM3..27352.	-0.241119	-0.24032	6.79e-14	901	0.00235322	TRUE	SGSM3
NKTR..4820.	-0.248823	-0.240205	6.99e-14	902	0.00235583	TRUE	NKTR
RASSF7..8045.	0.215157	0.240079	7.2e-14	903	0.00235844	TRUE	RASSF7
NARS..4677.	-0.239966	-0.240064	7.23e-14	904	0.00236105	TRUE	NARS
ELP3..55140.	-0.243197	-0.239901	7.52e-14	905	0.00236367	TRUE	ELP3
LSM7..51690.	-0.250952	-0.239896	7.53e-14	906	0.00236628	TRUE	LSM7
SCRIB..23513.	0.182558	0.239895	7.54e-14	907	0.00236889	TRUE	SCRIB
MBD1..4152.	-0.270175	-0.239858	7.6e-14	908	0.0023715	TRUE	MBD1
TMEM119..338773.	-0.229707	-0.239786	7.74e-14	909	0.00237411	TRUE	TMEM119
ABTB2..25841.	0.241965	0.239655	7.99e-14	910	0.00237672	TRUE	ABTB2
C16orf86..388284.	-0.239634	-0.239586	8.13e-14	911	0.00237934	TRUE	C16orf86
S100A14..57402.	0.210516	0.239545	8.21e-14	912	0.00238195	TRUE	S100A14
PCLO..27445.	0.21377	0.239541	8.21e-14	913	0.00238456	TRUE	PCLO
ACSL3..2181.	0.244623	0.2393	8.71e-14	914	0.00238717	TRUE	ACSL3
FEM1A..55527.	-0.27991	-0.239243	8.84e-14	915	0.00238978	TRUE	FEM1A
CKMT1B..1159.	0.204912	0.239218	8.89e-14	916	0.00239239	TRUE	CKMT1B
TPST2..8459.	-0.197838	-0.239133	9.07e-14	917	0.00239501	TRUE	TPST2
TNFSF4..7292.	-0.209964	-0.239007	9.36e-14	918	0.00239762	TRUE	TNFSF4
CCDC25..55246.	-0.241681	-0.238852	9.72e-14	919	0.00240023	TRUE	CCDC25
CLCN2..1181.	0.222115	0.238705	1.01e-13	920	0.00240284	TRUE	CLCN2
MID2..11043.	0.253123	0.238655	1.02e-13	921	0.00240545	TRUE	MID2
GABPA..2551.	-0.242833	-0.238637	1.02e-13	922	0.00240807	TRUE	GABPA
PLEK..5341.	-0.258719	-0.238605	1.03e-13	923	0.00241068	TRUE	PLEK
HNRNPDL..9987.	-0.241134	-0.238582	1.04e-13	924	0.00241329	TRUE	HNRNPDL
NECTIN2..5819.	0.242629	0.238506	1.06e-13	925	0.0024159	TRUE	NECTIN2
RAG2..5897.	-0.228374	-0.238469	1.07e-13	926	0.00241851	TRUE	RAG2
SIK1B..102724428.	0.221547	0.238453	1.07e-13	927	0.00242112	TRUE	SIK1B
LRP2BP..55805.	-0.228335	-0.238439	1.07e-13	928	0.00242374	TRUE	LRP2BP
DEPDC5..9681.	-0.236202	-0.238436	1.08e-13	929	0.00242635	TRUE	DEPDC5
TMEM17..200728.	0.256312	0.238353	1.1e-13	930	0.00242896	TRUE	TMEM17
DPY30..84661.	0.208074	0.238345	1.1e-13	931	0.00243157	TRUE	DPY30
ZDHHC9..51114.	0.249279	0.238322	1.11e-13	932	0.00243418	TRUE	ZDHHC9
SLC48A1..55652.	0.1982	0.238239	1.13e-13	933	0.00243679	TRUE	SLC48A1
ITGB5..3693.	0.260897	0.238213	1.13e-13	934	0.00243941	TRUE	ITGB5
STK11..6794.	-0.226951	-0.23821	1.14e-13	935	0.00244202	TRUE	STK11
EIF2D..1939.	-0.229515	-0.23821	1.14e-13	936	0.00244463	TRUE	EIF2D
ZNF37A..7587.	-0.24219	-0.238177	1.14e-13	937	0.00244724	TRUE	ZNF37A
MCPH1..79648.	-0.269265	-0.238158	1.15e-13	938	0.00244985	TRUE	MCPH1
APOBEC3D..140564.	-0.260139	-0.23813	1.16e-13	939	0.00245247	TRUE	APOBEC3D
PRMT9..90826.	-0.250656	-0.238127	1.16e-13	940	0.00245508	TRUE	PRMT9
SUSD4..55061.	0.200054	0.238021	1.19e-13	941	0.00245769	TRUE	SUSD4
CDC40..51362.	-0.229298	-0.238018	1.19e-13	942	0.0024603	TRUE	CDC40
PPIC..5480.	0.259197	0.237943	1.21e-13	943	0.00246291	TRUE	PPIC
CNTNAP3C..100289279.	0.244632	0.237913	1.22e-13	944	0.00246552	TRUE	CNTNAP3C
ELOVL7..79993.	0.195932	0.237871	1.23e-13	945	0.00246814	TRUE	ELOVL7
ZNF445..353274.	-0.247176	-0.237846	1.24e-13	946	0.00247075	TRUE	ZNF445
GYPC..2995.	-0.237587	-0.237757	1.27e-13	947	0.00247336	TRUE	GYPC
SLC2A5..6518.	-0.235829	-0.237601	1.32e-13	948	0.00247597	TRUE	SLC2A5
NQO1..1728.	0.245493	0.23757	1.33e-13	949	0.00247858	TRUE	NQO1
DNAH1..25981.	-0.249016	-0.237554	1.33e-13	950	0.00248119	TRUE	DNAH1
PHLDB2..90102.	0.262908	0.237415	1.38e-13	951	0.00248381	TRUE	PHLDB2
GGCT..79017.	0.205941	0.237303	1.41e-13	952	0.00248642	TRUE	GGCT
TEAD3..7005.	0.233197	0.237208	1.45e-13	953	0.00248903	TRUE	TEAD3
HNRNPA1..3178.	-0.231272	-0.237119	1.48e-13	954	0.00249164	TRUE	HNRNPA1
PRKCZ..5590.	0.218014	0.237117	1.48e-13	955	0.00249425	TRUE	PRKCZ
SRR..63826.	-0.20866	-0.237103	1.48e-13	956	0.00249687	TRUE	SRR
ALDH3B2..222.	0.19691	0.23708	1.49e-13	957	0.00249948	TRUE	ALDH3B2
NDUFB9..4715.	0.209811	0.237063	1.5e-13	958	0.00250209	TRUE	NDUFB9
PRKAA2..5563.	0.215021	0.23704	1.51e-13	959	0.0025047	TRUE	PRKAA2
S1PR2..9294.	-0.231699	-0.237033	1.51e-13	960	0.00250731	TRUE	S1PR2
B3GALNT1..8706.	0.242508	0.237027	1.51e-13	961	0.00250993	TRUE	B3GALNT1
CKMT1A..548596.	0.204649	0.236869	1.57e-13	962	0.00251254	TRUE	CKMT1A
ME1..4199.	0.256349	0.236831	1.58e-13	963	0.00251515	TRUE	ME1
RPP25..54913.	0.206198	0.236825	1.59e-13	964	0.00251776	TRUE	RPP25
KIF3B..9371.	0.24568	0.2368	1.6e-13	965	0.00252037	TRUE	KIF3B
APP..351.	0.240608	0.236783	1.6e-13	966	0.00252298	TRUE	APP
GPSM3..63940.	-0.240816	-0.236682	1.64e-13	967	0.00252559	TRUE	GPSM3
SMAD4..4089.	-0.213918	-0.236564	1.69e-13	968	0.00252821	TRUE	SMAD4
LONRF3..79836.	0.212364	0.236401	1.76e-13	969	0.00253082	TRUE	LONRF3
PCSK7..9159.	-0.232378	-0.236382	1.77e-13	970	0.00253343	TRUE	PCSK7
IMPDH2..3615.	-0.207165	-0.236153	1.87e-13	971	0.00253604	TRUE	IMPDH2
SRCIN1..80725.	0.175867	0.236113	1.88e-13	972	0.00253865	TRUE	SRCIN1
MT.CO3..4514.	0.227852	0.236106	1.89e-13	973	0.00254127	TRUE	MT
FIP1L1..81608.	-0.237213	-0.236079	1.9e-13	974	0.00254388	TRUE	FIP1L1
PTHLH..5744.	0.25374	0.235915	1.98e-13	975	0.00254649	TRUE	PTHLH
TLN1..7094.	-0.200619	-0.235886	1.99e-13	976	0.0025491	TRUE	TLN1
GAS8..2622.	0.216886	0.235882	1.99e-13	977	0.00255171	TRUE	GAS8
GNG7..2788.	-0.248364	-0.235728	2.07e-13	978	0.00255433	TRUE	GNG7
MT.ATP8..4509.	0.217378	0.235672	2.09e-13	979	0.00255694	TRUE	MT
S100A9..6280.	0.224232	0.235602	2.13e-13	980	0.00255955	TRUE	S100A9
RPS15A..6210.	-0.246342	-0.235591	2.13e-13	981	0.00256216	TRUE	RPS15A
DHCR24..1718.	0.228041	0.235582	2.14e-13	982	0.00256477	TRUE	DHCR24
RNF41..10193.	-0.249508	-0.235535	2.16e-13	983	0.00256738	TRUE	RNF41
CDCP1..64866.	0.239076	0.235481	2.19e-13	984	0.00257	TRUE	CDCP1
YES1..7525.	0.259438	0.23543	2.22e-13	985	0.00257261	TRUE	YES1
ATXN7..6314.	-0.235144	-0.235344	2.26e-13	986	0.00257522	TRUE	ATXN7
PWWP2B..170394.	0.17478	0.235341	2.27e-13	987	0.00257783	TRUE	PWWP2B
TPD52..7163.	0.20819	0.235295	2.29e-13	988	0.00258044	TRUE	TPD52
TFB1M..51106.	-0.217902	-0.235274	2.3e-13	989	0.00258305	TRUE	TFB1M
CRB3..92359.	0.200762	0.235221	2.33e-13	990	0.00258567	TRUE	CRB3
TBCK..93627.	-0.274206	-0.235015	2.45e-13	991	0.00258828	TRUE	TBCK
KYAT3..56267.	-0.187238	-0.235003	2.46e-13	992	0.00259089	TRUE	KYAT3
MBNL1..4154.	-0.218386	-0.234951	2.49e-13	993	0.0025935	TRUE	MBNL1
CD69..969.	-0.240823	-0.234933	2.5e-13	994	0.00259611	TRUE	CD69
TRMT12..55039.	0.207728	0.234867	2.54e-13	995	0.00259873	TRUE	TRMT12
ECT2..1894.	0.234472	0.234865	2.54e-13	996	0.00260134	TRUE	ECT2
PRSS16..10279.	0.209859	0.234863	2.54e-13	997	0.00260395	TRUE	PRSS16
MBD3..53615.	-0.245015	-0.234836	2.56e-13	998	0.00260656	TRUE	MBD3
CADM4..199731.	0.192688	0.234805	2.58e-13	999	0.00260917	TRUE	CADM4
IL2RG..3561.	-0.247371	-0.234777	2.59e-13	1000	0.00261178	TRUE	IL2RG
RAD54L2..23132.	-0.240238	-0.234647	2.67e-13	1001	0.0026144	TRUE	RAD54L2
HLA.DPA1..3113.	-0.215638	-0.234597	2.71e-13	1002	0.00261701	TRUE	HLA
MT.ND1..4535.	0.202238	0.234596	2.71e-13	1003	0.00261962	TRUE	MT
ZNF852..285346.	-0.258879	-0.234516	2.76e-13	1004	0.00262223	TRUE	ZNF852
ZNF18..7566.	-0.222637	-0.234463	2.79e-13	1005	0.00262484	TRUE	ZNF18
CREG2..200407.	0.220637	0.23445	2.8e-13	1006	0.00262745	TRUE	CREG2
FOLR1..2348.	0.222551	0.234403	2.84e-13	1007	0.00263007	TRUE	FOLR1
HDHD2..84064.	-0.26583	-0.234334	2.88e-13	1008	0.00263268	TRUE	HDHD2
TMEM41A..90407.	0.218237	0.234307	2.9e-13	1009	0.00263529	TRUE	TMEM41A
UBA7..7318.	-0.21094	-0.234214	2.97e-13	1010	0.0026379	TRUE	UBA7
TIFA..92610.	-0.244148	-0.234189	2.98e-13	1011	0.00264051	TRUE	TIFA
S100A10..6281.	0.25059	0.234125	3.03e-13	1012	0.00264313	TRUE	S100A10
PPP1R13B..23368.	0.19921	0.234075	3.07e-13	1013	0.00264574	TRUE	PPP1R13B
HOXC13..3229.	0.226727	0.234059	3.08e-13	1014	0.00264835	TRUE	HOXC13
TRANK1..9881.	-0.224438	-0.233999	3.12e-13	1015	0.00265096	TRUE	TRANK1
SQSTM1..8878.	0.244282	0.233996	3.12e-13	1016	0.00265357	TRUE	SQSTM1
HLA.DPB1..3115.	-0.213132	-0.233923	3.18e-13	1017	0.00265619	TRUE	HLA
TPD52L2..7165.	0.231926	0.233919	3.18e-13	1018	0.0026588	TRUE	TPD52L2
CCR7..1236.	-0.228427	-0.233906	3.19e-13	1019	0.00266141	TRUE	CCR7
PKD1L2..114780.	0.238931	0.233902	3.19e-13	1020	0.00266402	TRUE	PKD1L2
GPRIN2..9721.	0.214661	0.233882	3.21e-13	1021	0.00266663	TRUE	GPRIN2
MANSC1..54682.	0.22457	0.233799	3.27e-13	1022	0.00266924	TRUE	MANSC1
RPL32..6161.	-0.231718	-0.233795	3.28e-13	1023	0.00267185	TRUE	RPL32
AFAP1L2..84632.	0.223974	0.233756	3.31e-13	1024	0.00267447	TRUE	AFAP1L2
HERC3..8916.	-0.215922	-0.233672	3.37e-13	1025	0.00267708	TRUE	HERC3
DGCR6..8214.	0.187964	0.233598	3.43e-13	1026	0.00267969	TRUE	DGCR6
NFE2L3..9603.	0.233951	0.233532	3.49e-13	1027	0.0026823	TRUE	NFE2L3
ZNF596..169270.	-0.242612	-0.233493	3.52e-13	1028	0.00268491	TRUE	ZNF596
KIAA1211L..343990.	0.210007	0.233387	3.61e-13	1029	0.00268753	TRUE	KIAA1211L
HIST1H2BD..3017.	0.213059	0.233386	3.61e-13	1030	0.00269014	TRUE	HIST1H2BD
NIPAL1..152519.	0.233815	0.233371	3.62e-13	1031	0.00269275	TRUE	NIPAL1
PLSCR1..5359.	0.228273	0.23332	3.67e-13	1032	0.00269536	TRUE	PLSCR1
SHANK1..50944.	-0.236433	-0.233256	3.72e-13	1033	0.00269797	TRUE	SHANK1
FAM160A1..729830.	0.206957	0.233245	3.73e-13	1034	0.00270059	TRUE	FAM160A1
AIF1..199.	-0.247572	-0.233217	3.76e-13	1035	0.0027032	TRUE	AIF1
CCDC185..164127.	0.173498	0.233208	3.77e-13	1036	0.00270581	TRUE	CCDC185
CD4..920.	-0.248476	-0.233195	3.78e-13	1037	0.00270842	TRUE	CD4
ROCK1..6093.	-0.236215	-0.233189	3.78e-13	1038	0.00271103	TRUE	ROCK1
PPP1R12A..4659.	-0.220363	-0.23317	3.8e-13	1039	0.00271364	TRUE	PPP1R12A
DNAJC8..22826.	-0.212371	-0.233077	3.88e-13	1040	0.00271626	TRUE	DNAJC8
CD276..80381.	0.236157	0.233038	3.92e-13	1041	0.00271887	TRUE	CD276
TLE1..7088.	0.26835	0.233	3.96e-13	1042	0.00272148	TRUE	TLE1
PDCD6..10016.	0.222051	0.232935	4.02e-13	1043	0.00272409	TRUE	PDCD6
RAE1..8480.	0.245924	0.232933	4.02e-13	1044	0.0027267	TRUE	RAE1
ARHGEF28..64283.	0.247879	0.232893	4.06e-13	1045	0.00272931	TRUE	ARHGEF28
SIGLEC10..89790.	-0.24966	-0.232858	4.09e-13	1046	0.00273193	TRUE	SIGLEC10
SHANK2..22941.	0.193314	0.232772	4.18e-13	1047	0.00273454	TRUE	SHANK2
SPATS2L..26010.	0.270484	0.232766	4.18e-13	1048	0.00273715	TRUE	SPATS2L
RTKN..6242.	0.201375	0.232741	4.21e-13	1049	0.00273976	TRUE	RTKN
RAD17..5884.	-0.256341	-0.232621	4.33e-13	1050	0.00274237	TRUE	RAD17
NDUFS8..4728.	0.204418	0.232604	4.34e-13	1051	0.00274499	TRUE	NDUFS8
DSTN..11034.	0.241003	0.232561	4.39e-13	1052	0.0027476	TRUE	DSTN
LIX1L..128077.	-0.213007	-0.232521	4.43e-13	1053	0.00275021	TRUE	LIX1L
SPATA2..9825.	0.218821	0.232511	4.44e-13	1054	0.00275282	TRUE	SPATA2
PSMC4..5704.	0.225511	0.232493	4.46e-13	1055	0.00275543	TRUE	PSMC4
MYO5C..55930.	0.189564	0.232488	4.47e-13	1056	0.00275804	TRUE	MYO5C
PPP1R13L..10848.	0.21861	0.232474	4.48e-13	1057	0.00276066	TRUE	PPP1R13L
PRKCB..5579.	-0.252443	-0.232464	4.49e-13	1058	0.00276327	TRUE	PRKCB
GPRC5B..51704.	0.238084	0.232375	4.59e-13	1059	0.00276588	TRUE	GPRC5B
RPLP2..6181.	-0.229839	-0.232372	4.59e-13	1060	0.00276849	TRUE	RPLP2
KRT78..196374.	0.202565	0.232318	4.65e-13	1061	0.0027711	TRUE	KRT78
TNFRSF12A..51330.	0.256946	0.232258	4.71e-13	1062	0.00277371	TRUE	TNFRSF12A
FAM83A..84985.	0.22193	0.232181	4.8e-13	1063	0.00277633	TRUE	FAM83A
IER3..8870.	0.251038	0.232081	4.92e-13	1064	0.00277894	TRUE	IER3
RSU1..6251.	-0.214972	-0.23199	5.02e-13	1065	0.00278155	TRUE	RSU1
POU2AF1..5450.	-0.232312	-0.231986	5.03e-13	1066	0.00278416	TRUE	POU2AF1
KDM4B..23030.	-0.256693	-0.231969	5.05e-13	1067	0.00278677	TRUE	KDM4B
VPS37C..55048.	0.214773	0.231915	5.11e-13	1068	0.00278939	TRUE	VPS37C
ERMN..57471.	-0.22666	-0.231886	5.15e-13	1069	0.002792	TRUE	ERMN
SLC35A2..7355.	0.218092	0.231862	5.18e-13	1070	0.00279461	TRUE	SLC35A2
ARHGAP32..9743.	0.211269	0.231691	5.39e-13	1071	0.00279722	TRUE	ARHGAP32
ANLN..54443.	0.258605	0.231664	5.42e-13	1072	0.00279983	TRUE	ANLN
SULT2B1..6820.	0.193229	0.231639	5.45e-13	1073	0.00280245	TRUE	SULT2B1
GJB3..2707.	0.22032	0.231572	5.54e-13	1074	0.00280506	TRUE	GJB3
GTPBP6..8225.	-0.250597	-0.231541	5.58e-13	1075	0.00280767	TRUE	GTPBP6
TM4SF1..4071.	0.27006	0.231463	5.69e-13	1076	0.00281028	TRUE	TM4SF1
TEAD4..7004.	0.248952	0.231452	5.7e-13	1077	0.00281289	TRUE	TEAD4
DAG1..1605.	0.259712	0.231423	5.74e-13	1078	0.0028155	TRUE	DAG1
PPP1R8..5511.	-0.226674	-0.2314	5.77e-13	1079	0.00281811	TRUE	PPP1R8
TTC30A..92104.	0.205483	0.231379	5.8e-13	1080	0.00282073	TRUE	TTC30A
CABYR..26256.	0.228127	0.231373	5.81e-13	1081	0.00282334	TRUE	CABYR
SOWAHB..345079.	0.205936	0.231312	5.89e-13	1082	0.00282595	TRUE	SOWAHB
PFDN4..5203.	0.2599	0.23117	6.09e-13	1083	0.00282856	TRUE	PFDN4
ITGA2..3673.	0.255634	0.231155	6.11e-13	1084	0.00283117	TRUE	ITGA2
ALOX5AP..241.	-0.227052	-0.231137	6.14e-13	1085	0.00283379	TRUE	ALOX5AP
NFATC1..4772.	-0.24574	-0.231095	6.2e-13	1086	0.0028364	TRUE	NFATC1
MAP1A..4130.	-0.218742	-0.231062	6.25e-13	1087	0.00283901	TRUE	MAP1A
LRIG3..121227.	0.257293	0.231038	6.28e-13	1088	0.00284162	TRUE	LRIG3
GTF2E2..2961.	-0.211357	-0.231012	6.32e-13	1089	0.00284423	TRUE	GTF2E2
PCM1..5108.	-0.266185	-0.230901	6.49e-13	1090	0.00284685	TRUE	PCM1
MYZAP..100820829.	0.208002	0.230815	6.62e-13	1091	0.00284946	TRUE	MYZAP
IL18..3606.	0.232255	0.23078	6.67e-13	1092	0.00285207	TRUE	IL18
ITCH..83737.	0.236285	0.230681	6.83e-13	1093	0.00285468	TRUE	ITCH
TINCR..257000.	0.207021	0.230583	6.99e-13	1094	0.00285729	TRUE	TINCR
LRP11..84918.	0.22664	0.230524	7.09e-13	1095	0.0028599	TRUE	LRP11
NOP14..8602.	-0.222904	-0.230485	7.15e-13	1096	0.00286252	TRUE	NOP14
AMOTL2..51421.	0.247751	0.23042	7.26e-13	1097	0.00286513	TRUE	AMOTL2
RPS12..6206.	-0.225749	-0.230387	7.32e-13	1098	0.00286774	TRUE	RPS12
GPR37..2861.	0.216004	0.230378	7.33e-13	1099	0.00287035	TRUE	GPR37
PPP1R1C..151242.	0.218	0.230355	7.37e-13	1100	0.00287296	TRUE	PPP1R1C
MALL..7851.	0.241011	0.230283	7.5e-13	1101	0.00287558	TRUE	MALL
ARHGAP19..84986.	-0.263268	-0.230272	7.52e-13	1102	0.00287819	TRUE	ARHGAP19
PLS3..5358.	0.263612	0.230122	7.78e-13	1103	0.0028808	TRUE	PLS3
SPAG7..9552.	-0.224915	-0.230032	7.95e-13	1104	0.00288341	TRUE	SPAG7
ENTPD1..953.	-0.23193	-0.229951	8.1e-13	1105	0.00288602	TRUE	ENTPD1
EPS8L2..64787.	0.217129	0.229937	8.13e-13	1106	0.00288863	TRUE	EPS8L2
PKD1..5310.	-0.235607	-0.229906	8.19e-13	1107	0.00289125	TRUE	PKD1
GEMIN8..54960.	-0.237264	-0.22986	8.28e-13	1108	0.00289386	TRUE	GEMIN8
UBA52..7311.	-0.216205	-0.229817	8.36e-13	1109	0.00289647	TRUE	UBA52
TCF4..6925.	-0.230159	-0.229767	8.46e-13	1110	0.00289908	TRUE	TCF4
ZNF25..219749.	-0.227083	-0.22962	8.75e-13	1111	0.00290169	TRUE	ZNF25
SCFD2..152579.	-0.218393	-0.229612	8.77e-13	1112	0.0029043	TRUE	SCFD2
KLRG2..346689.	0.202075	0.229591	8.81e-13	1113	0.00290692	TRUE	KLRG2
EVI2A..2123.	-0.220184	-0.22957	8.85e-13	1114	0.00290953	TRUE	EVI2A
TNKS..8658.	-0.244844	-0.229527	8.94e-13	1115	0.00291214	TRUE	TNKS
PAX9..5083.	0.210843	0.229527	8.94e-13	1116	0.00291475	TRUE	PAX9
SLC43A1..8501.	-0.225757	-0.229417	9.18e-13	1117	0.00291736	TRUE	SLC43A1
OTUD7B..56957.	0.223168	0.229386	9.24e-13	1118	0.00291998	TRUE	OTUD7B
ZC2HC1C..79696.	0.175582	0.229328	9.37e-13	1119	0.00292259	TRUE	ZC2HC1C
RPN2..6185.	0.251082	0.229307	9.41e-13	1120	0.0029252	TRUE	RPN2
ALDH18A1..5832.	-0.234957	-0.22921	9.63e-13	1121	0.00292781	TRUE	ALDH18A1
DBNDD1..79007.	0.206075	0.229184	9.69e-13	1122	0.00293042	TRUE	DBNDD1
CLECL1..160365.	-0.247419	-0.229005	1.01e-12	1123	0.00293303	TRUE	CLECL1
SLC9A3R2..9351.	0.222774	0.228973	1.02e-12	1124	0.00293565	TRUE	SLC9A3R2
SYNGR2..9144.	0.165893	0.228942	1.02e-12	1125	0.00293826	TRUE	SYNGR2
PTPN12..5782.	0.242052	0.228939	1.03e-12	1126	0.00294087	TRUE	PTPN12
MARCKS..4082.	0.244564	0.228871	1.04e-12	1127	0.00294348	TRUE	MARCKS
PLEKHN1..84069.	0.219394	0.228841	1.05e-12	1128	0.00294609	TRUE	PLEKHN1
RPS4X..6191.	-0.229706	-0.228788	1.06e-12	1129	0.0029487	TRUE	RPS4X
C3orf62..375341.	-0.208255	-0.228786	1.06e-12	1130	0.00295132	TRUE	C3orf62
UPK2..7379.	0.221931	0.228711	1.08e-12	1131	0.00295393	TRUE	UPK2
C2orf15..150590.	0.176268	0.228704	1.08e-12	1132	0.00295654	TRUE	C2orf15
SERPINA9..327657.	-0.206536	-0.228655	1.1e-12	1133	0.00295915	TRUE	SERPINA9
LMTK2..22853.	0.210634	0.228598	1.11e-12	1134	0.00296176	TRUE	LMTK2
MAPRE3..22924.	0.203841	0.228474	1.14e-12	1135	0.00296437	TRUE	MAPRE3
USP43..124739.	0.193751	0.228372	1.17e-12	1136	0.00296699	TRUE	USP43
PPP1R3D..5509.	0.219039	0.228367	1.17e-12	1137	0.0029696	TRUE	PPP1R3D
PTGFRN..5738.	0.24013	0.228361	1.17e-12	1138	0.00297221	TRUE	PTGFRN
CTDP1..9150.	-0.245425	-0.228344	1.18e-12	1139	0.00297482	TRUE	CTDP1
PEX11A..8800.	0.210519	0.228251	1.2e-12	1140	0.00297743	TRUE	PEX11A
CHKA..1119.	0.207255	0.228235	1.21e-12	1141	0.00298005	TRUE	CHKA
HCAR1..27198.	0.196675	0.228154	1.23e-12	1142	0.00298266	TRUE	HCAR1
RPL5..6125.	-0.20761	-0.228143	1.23e-12	1143	0.00298527	TRUE	RPL5
C1orf226..400793.	0.214608	0.22808	1.25e-12	1144	0.00298788	TRUE	C1orf226
PXDC1..221749.	0.256809	0.228011	1.27e-12	1145	0.00299049	TRUE	PXDC1
ST6GALNAC6..30815.	-0.225789	-0.227954	1.29e-12	1146	0.0029931	TRUE	ST6GALNAC6
CLDN12..9069.	0.246263	0.227942	1.29e-12	1147	0.00299572	TRUE	CLDN12
ERGIC3..51614.	0.216798	0.22789	1.31e-12	1148	0.00299833	TRUE	ERGIC3
S100A16..140576.	0.248056	0.227861	1.32e-12	1149	0.00300094	TRUE	S100A16
NAP1L1..4673.	-0.22892	-0.227751	1.35e-12	1150	0.00300355	TRUE	NAP1L1
P2RX1..5023.	-0.251171	-0.227679	1.37e-12	1151	0.00300616	TRUE	P2RX1
TWF2..11344.	-0.199553	-0.227649	1.38e-12	1152	0.00300878	TRUE	TWF2
SLC35D2..11046.	0.250051	0.227538	1.42e-12	1153	0.00301139	TRUE	SLC35D2
ARPP21..10777.	-0.225868	-0.227499	1.43e-12	1154	0.003014	TRUE	ARPP21
GPX7..2882.	-0.243454	-0.227284	1.5e-12	1155	0.00301661	TRUE	GPX7
FA2H..79152.	0.19346	0.227278	1.51e-12	1156	0.00301922	TRUE	FA2H
CETN2..1069.	0.227518	0.227254	1.51e-12	1157	0.00302184	TRUE	CETN2
ERBB2..2064.	0.218789	0.227246	1.52e-12	1158	0.00302445	TRUE	ERBB2
MBLAC2..153364.	-0.240297	-0.227237	1.52e-12	1159	0.00302706	TRUE	MBLAC2
NTF4..4909.	0.216807	0.227223	1.52e-12	1160	0.00302967	TRUE	NTF4
CDPF1..150383.	-0.206724	-0.227211	1.53e-12	1161	0.00303228	TRUE	CDPF1
TLR9..54106.	-0.226337	-0.227188	1.54e-12	1162	0.00303489	TRUE	TLR9
XPNPEP1..7511.	-0.223402	-0.227183	1.54e-12	1163	0.0030375	TRUE	XPNPEP1
PI4K2B..55300.	-0.208539	-0.227162	1.55e-12	1164	0.00304012	TRUE	PI4K2B
EHF..26298.	0.219697	0.227118	1.56e-12	1165	0.00304273	TRUE	EHF
BDH2..56898.	-0.211298	-0.227107	1.57e-12	1166	0.00304534	TRUE	BDH2
MID1..4281.	0.254813	0.227046	1.59e-12	1167	0.00304795	TRUE	MID1
DCAF17..80067.	-0.246015	-0.226998	1.61e-12	1168	0.00305056	TRUE	DCAF17
TMEM105..284186.	0.20781	0.226962	1.62e-12	1169	0.00305318	TRUE	TMEM105
SYNE1..23345.	-0.201392	-0.226954	1.62e-12	1170	0.00305579	TRUE	SYNE1
HLA.DQA1..3117.	-0.228375	-0.226874	1.65e-12	1171	0.0030584	TRUE	HLA
OPHN1..4983.	0.254053	0.226863	1.66e-12	1172	0.00306101	TRUE	OPHN1
KPNA7..402569.	0.236478	0.226782	1.69e-12	1173	0.00306362	TRUE	KPNA7
SMAP2..64744.	-0.231144	-0.226779	1.69e-12	1174	0.00306624	TRUE	SMAP2
CNNM1..26507.	0.164151	0.226772	1.69e-12	1175	0.00306885	TRUE	CNNM1
CSGALNACT2..55454.	-0.229754	-0.226756	1.7e-12	1176	0.00307146	TRUE	CSGALNACT2
SNX22..79856.	-0.2484	-0.226753	1.7e-12	1177	0.00307407	TRUE	SNX22
MYB..4602.	-0.252719	-0.226659	1.74e-12	1178	0.00307668	TRUE	MYB
CAV2..858.	0.24951	0.226625	1.75e-12	1179	0.00307929	TRUE	CAV2
LSM6..11157.	-0.245725	-0.226616	1.75e-12	1180	0.00308191	TRUE	LSM6
LY9..4063.	-0.223364	-0.226572	1.77e-12	1181	0.00308452	TRUE	LY9
TRAK1..22906.	-0.203564	-0.226535	1.79e-12	1182	0.00308713	TRUE	TRAK1
CARMIL2..146206.	-0.27307	-0.226507	1.8e-12	1183	0.00308974	TRUE	CARMIL2
THRAP3..9967.	-0.230148	-0.226425	1.83e-12	1184	0.00309235	TRUE	THRAP3
WDR48..57599.	-0.215998	-0.226424	1.83e-12	1185	0.00309496	TRUE	WDR48
ZNF589..51385.	-0.220916	-0.226394	1.85e-12	1186	0.00309758	TRUE	ZNF589
KDM2B..84678.	-0.252939	-0.226334	1.87e-12	1187	0.00310019	TRUE	KDM2B
CNKSR1..10256.	0.204998	0.226269	1.9e-12	1188	0.0031028	TRUE	CNKSR1
KDM4C..23081.	-0.229088	-0.226253	1.91e-12	1189	0.00310541	TRUE	KDM4C
PTPRU..10076.	0.185731	0.226211	1.92e-12	1190	0.00310802	TRUE	PTPRU
SMARCAD1..56916.	-0.23896	-0.226192	1.93e-12	1191	0.00311064	TRUE	SMARCAD1
RPS11..6205.	-0.241518	-0.226162	1.95e-12	1192	0.00311325	TRUE	RPS11
RDX..5962.	0.217947	0.226074	1.99e-12	1193	0.00311586	TRUE	RDX
CORO7..79585.	-0.265823	-0.226017	2.01e-12	1194	0.00311847	TRUE	CORO7
HMGB2..3148.	-0.254493	-0.226017	2.01e-12	1195	0.00312108	TRUE	HMGB2
DUSP4..1846.	0.210832	0.225982	2.03e-12	1196	0.00312369	TRUE	DUSP4
TTC6..319089.	0.188528	0.225975	2.03e-12	1197	0.00312631	TRUE	TTC6
LAX1..54900.	-0.246536	-0.225936	2.05e-12	1198	0.00312892	TRUE	LAX1
ZRSR2..8233.	-0.219749	-0.225923	2.06e-12	1199	0.00313153	TRUE	ZRSR2
GABRE..2564.	0.25207	0.225901	2.07e-12	1200	0.00313414	TRUE	GABRE
DOCK8..81704.	-0.259734	-0.225895	2.07e-12	1201	0.00313675	TRUE	DOCK8
KLHL8..57563.	-0.256792	-0.225839	2.1e-12	1202	0.00313936	TRUE	KLHL8
ANKRD13A..88455.	-0.208246	-0.225762	2.13e-12	1203	0.00314198	TRUE	ANKRD13A
PLBD1..79887.	0.211274	0.225756	2.14e-12	1204	0.00314459	TRUE	PLBD1
TNFAIP2..7127.	0.222244	0.225748	2.14e-12	1205	0.0031472	TRUE	TNFAIP2
CD1C..911.	-0.219334	-0.225734	2.15e-12	1206	0.00314981	TRUE	CD1C
CIITA..4261.	-0.22116	-0.225643	2.19e-12	1207	0.00315242	TRUE	CIITA
BORCS6..54785.	-0.223706	-0.225607	2.21e-12	1208	0.00315504	TRUE	BORCS6
HAUS1..115106.	-0.244411	-0.225606	2.21e-12	1209	0.00315765	TRUE	HAUS1
NLRC5..84166.	-0.202766	-0.225598	2.21e-12	1210	0.00316026	TRUE	NLRC5
PAX5..5079.	-0.230567	-0.225553	2.24e-12	1211	0.00316287	TRUE	PAX5
LRRC8E..80131.	0.23459	0.225503	2.26e-12	1212	0.00316548	TRUE	LRRC8E
ADGRF4..221393.	0.227391	0.22548	2.27e-12	1213	0.00316809	TRUE	ADGRF4
SYNM..23336.	0.211812	0.225471	2.28e-12	1214	0.00317071	TRUE	SYNM
CTAGE4..100128553.	0.213489	0.225417	2.31e-12	1215	0.00317332	TRUE	CTAGE4
F12..2161.	0.170239	0.225406	2.31e-12	1216	0.00317593	TRUE	F12
KCNK1..3775.	0.210458	0.225396	2.32e-12	1217	0.00317854	TRUE	KCNK1
MRGPRF..116535.	-0.202501	-0.225389	2.32e-12	1218	0.00318115	TRUE	MRGPRF
BICDL2..146439.	0.199096	0.225364	2.34e-12	1219	0.00318376	TRUE	BICDL2
PSEN2..5664.	0.213606	0.225354	2.34e-12	1220	0.00318638	TRUE	PSEN2
POLR3D..661.	-0.230039	-0.225205	2.42e-12	1221	0.00318899	TRUE	POLR3D
IZUMO4..113177.	-0.243784	-0.225089	2.49e-12	1222	0.0031916	TRUE	IZUMO4
H1F0..3005.	0.213686	0.225072	2.5e-12	1223	0.00319421	TRUE	H1F0
NOL3..8996.	0.205682	0.225054	2.51e-12	1224	0.00319682	TRUE	NOL3
NUBPL..80224.	0.221802	0.224976	2.55e-12	1225	0.00319944	TRUE	NUBPL
NCR3..259197.	-0.232318	-0.224955	2.56e-12	1226	0.00320205	TRUE	NCR3
RPL41..6171.	-0.245714	-0.224944	2.57e-12	1227	0.00320466	TRUE	RPL41
RYR1..6261.	0.183958	0.224863	2.62e-12	1228	0.00320727	TRUE	RYR1
TERF2IP..54386.	-0.238541	-0.224855	2.62e-12	1229	0.00320988	TRUE	TERF2IP
ABHD17B..51104.	-0.22018	-0.224677	2.73e-12	1230	0.0032125	TRUE	ABHD17B
CASKIN2..57513.	0.207094	0.22465	2.75e-12	1231	0.00321511	TRUE	CASKIN2
INTS9..55756.	-0.236541	-0.224628	2.76e-12	1232	0.00321772	TRUE	INTS9
ELF1..1997.	-0.219722	-0.224605	2.78e-12	1233	0.00322033	TRUE	ELF1
SLC52A3..113278.	0.182097	0.224602	2.78e-12	1234	0.00322294	TRUE	SLC52A3
MEF2C..4208.	-0.206546	-0.224551	2.81e-12	1235	0.00322555	TRUE	MEF2C
ZNF575..284346.	-0.226465	-0.224512	2.84e-12	1236	0.00322816	TRUE	ZNF575
FMNL3..91010.	-0.202383	-0.224488	2.85e-12	1237	0.00323078	TRUE	FMNL3
KLK5..25818.	0.200084	0.224293	2.98e-12	1238	0.00323339	TRUE	KLK5
RBP7..116362.	0.206286	0.22422	3.03e-12	1239	0.003236	TRUE	RBP7
ZNF512B..57473.	0.197246	0.224131	3.09e-12	1240	0.00323861	TRUE	ZNF512B
LCP2..3937.	-0.245465	-0.224045	3.15e-12	1241	0.00324122	TRUE	LCP2
WWTR1..25937.	0.248141	0.22403	3.17e-12	1242	0.00324384	TRUE	WWTR1
CRABP2..1382.	0.188328	0.223906	3.26e-12	1243	0.00324645	TRUE	CRABP2
PLCL2..23228.	-0.232097	-0.223867	3.28e-12	1244	0.00324906	TRUE	PLCL2
DAZAP1..26528.	-0.245152	-0.223858	3.29e-12	1245	0.00325167	TRUE	DAZAP1
ELMO3..79767.	0.195211	0.223803	3.33e-12	1246	0.00325428	TRUE	ELMO3
CARF..79800.	-0.238624	-0.223703	3.41e-12	1247	0.0032569	TRUE	CARF
TMC8..147138.	-0.243766	-0.223658	3.44e-12	1248	0.00325951	TRUE	TMC8
HTR1D..3352.	0.205074	0.223616	3.48e-12	1249	0.00326212	TRUE	HTR1D
PPP6R2..9701.	-0.237761	-0.223538	3.54e-12	1250	0.00326473	TRUE	PPP6R2
AGAP3..116988.	0.202602	0.223537	3.54e-12	1251	0.00326734	TRUE	AGAP3
RWDD4..201965.	-0.228509	-0.223378	3.67e-12	1252	0.00326995	TRUE	RWDD4
RGL4..266747.	-0.229592	-0.223307	3.73e-12	1253	0.00327257	TRUE	RGL4
CLBA1..122616.	0.195273	0.223305	3.73e-12	1254	0.00327518	TRUE	CLBA1
TINAGL1..64129.	0.22542	0.223157	3.86e-12	1255	0.00327779	TRUE	TINAGL1
ARL11..115761.	-0.221595	-0.223111	3.9e-12	1256	0.0032804	TRUE	ARL11
DHCR7..1717.	0.204241	0.223104	3.9e-12	1257	0.00328301	TRUE	DHCR7
SUN1..23353.	0.215579	0.223094	3.91e-12	1258	0.00328562	TRUE	SUN1
HSPA2..3306.	0.180609	0.223031	3.97e-12	1259	0.00328824	TRUE	HSPA2
ATG16L2..89849.	-0.250604	-0.223023	3.98e-12	1260	0.00329085	TRUE	ATG16L2
SLC25A20..788.	-0.223482	-0.222932	4.06e-12	1261	0.00329346	TRUE	SLC25A20
FGL2..10875.	-0.207647	-0.222772	4.21e-12	1262	0.00329607	TRUE	FGL2
ADGRA2..25960.	-0.203433	-0.222768	4.21e-12	1263	0.00329868	TRUE	ADGRA2
PLCXD1..55344.	-0.240564	-0.222671	4.3e-12	1264	0.0033013	TRUE	PLCXD1
TMEM106B..54664.	0.229919	0.222655	4.32e-12	1265	0.00330391	TRUE	TMEM106B
PAN3..255967.	-0.23914	-0.222611	4.36e-12	1266	0.00330652	TRUE	PAN3
ZNF462..58499.	0.221166	0.222485	4.49e-12	1267	0.00330913	TRUE	ZNF462
DYRK3..8444.	-0.218238	-0.222451	4.52e-12	1268	0.00331174	TRUE	DYRK3
TBC1D30..23329.	0.180166	0.222373	4.6e-12	1269	0.00331435	TRUE	TBC1D30
CBFB..865.	-0.212226	-0.222337	4.64e-12	1270	0.00331697	TRUE	CBFB
B4GALT5..9334.	0.226667	0.222299	4.68e-12	1271	0.00331958	TRUE	B4GALT5
SDR16C5..195814.	0.19188	0.222262	4.72e-12	1272	0.00332219	TRUE	SDR16C5
FERMT3..83706.	-0.246992	-0.222248	4.73e-12	1273	0.0033248	TRUE	FERMT3
KLK8..11202.	0.214682	0.22218	4.81e-12	1274	0.00332741	TRUE	KLK8
CD247..919.	-0.230448	-0.222089	4.91e-12	1275	0.00333002	TRUE	CD247
MTHFS..10588.	0.188106	0.222056	4.94e-12	1276	0.00333264	TRUE	MTHFS
TEAD1..7003.	0.238486	0.222013	4.99e-12	1277	0.00333525	TRUE	TEAD1
MAP2K2..5605.	-0.208086	-0.221985	5.02e-12	1278	0.00333786	TRUE	MAP2K2
ST14..6768.	0.183916	0.221765	5.28e-12	1279	0.00334047	TRUE	ST14
DLK2..65989.	0.210949	0.221729	5.32e-12	1280	0.00334308	TRUE	DLK2
CNR2..1269.	-0.226696	-0.221653	5.41e-12	1281	0.0033457	TRUE	CNR2
STK31..56164.	0.235112	0.221631	5.44e-12	1282	0.00334831	TRUE	STK31
LUC7L..55692.	-0.248556	-0.221594	5.48e-12	1283	0.00335092	TRUE	LUC7L
AMIGO2..347902.	0.240599	0.221316	5.84e-12	1284	0.00335353	TRUE	AMIGO2
ANKRD37..353322.	-0.227194	-0.221183	6.01e-12	1285	0.00335614	TRUE	ANKRD37
CAMK2N1..55450.	0.220819	0.220985	6.29e-12	1286	0.00335876	TRUE	CAMK2N1
TCHH..7062.	0.172615	0.220917	6.38e-12	1287	0.00336137	TRUE	TCHH
ADH5..128.	-0.202872	-0.220917	6.38e-12	1288	0.00336398	TRUE	ADH5
NREP..9315.	-0.233491	-0.220855	6.47e-12	1289	0.00336659	TRUE	NREP
GREM2..64388.	-0.209499	-0.220781	6.58e-12	1290	0.0033692	TRUE	GREM2
TJP3..27134.	0.18771	0.220759	6.61e-12	1291	0.00337181	TRUE	TJP3
TERF2..7014.	-0.226041	-0.220757	6.61e-12	1292	0.00337442	TRUE	TERF2
CCDC12..151903.	-0.239965	-0.220719	6.67e-12	1293	0.00337704	TRUE	CCDC12
DNAJB14..79982.	-0.212859	-0.220718	6.67e-12	1294	0.00337965	TRUE	DNAJB14
FKBP9..11328.	0.237113	0.220716	6.68e-12	1295	0.00338226	TRUE	FKBP9
SLC46A1..113235.	0.195383	0.220685	6.72e-12	1296	0.00338487	TRUE	SLC46A1
TMEM205..374882.	0.196903	0.220639	6.79e-12	1297	0.00338748	TRUE	TMEM205
SPAG1..6674.	0.194823	0.22059	6.87e-12	1298	0.0033901	TRUE	SPAG1
HS6ST2..90161.	0.230689	0.220476	7.04e-12	1299	0.00339271	TRUE	HS6ST2
GLT8D1..55830.	-0.193714	-0.220467	7.06e-12	1300	0.00339532	TRUE	GLT8D1
ATP6V1B1..525.	0.19805	0.220461	7.07e-12	1301	0.00339793	TRUE	ATP6V1B1
ARL14EP..120534.	-0.220565	-0.220383	7.19e-12	1302	0.00340054	TRUE	ARL14EP
TFG..10342.	0.232874	0.220369	7.21e-12	1303	0.00340316	TRUE	TFG
ALS2CL..259173.	0.21273	0.220321	7.29e-12	1304	0.00340577	TRUE	ALS2CL
GTF2H2C..728340.	-0.204572	-0.2203	7.33e-12	1305	0.00340838	TRUE	GTF2H2C
MEDAG..84935.	-0.181476	-0.22026	7.39e-12	1306	0.00341099	TRUE	MEDAG
ICAM2..3384.	-0.230288	-0.220248	7.41e-12	1307	0.0034136	TRUE	ICAM2
MST1R..4486.	0.204682	0.22021	7.47e-12	1308	0.00341621	TRUE	MST1R
ZEB2..9839.	-0.202742	-0.220201	7.49e-12	1309	0.00341883	TRUE	ZEB2
RAB22A..57403.	0.249414	0.220187	7.51e-12	1310	0.00342144	TRUE	RAB22A
HPS4..89781.	-0.203096	-0.220187	7.51e-12	1311	0.00342405	TRUE	HPS4
RB1..5925.	-0.191951	-0.220184	7.52e-12	1312	0.00342666	TRUE	RB1
MPZL3..196264.	0.195191	0.22017	7.54e-12	1313	0.00342927	TRUE	MPZL3
STARD9..57519.	-0.217531	-0.220149	7.58e-12	1314	0.00343188	TRUE	STARD9
GPD2..2820.	0.23914	0.220074	7.7e-12	1315	0.0034345	TRUE	GPD2
TUBGCP6..85378.	-0.243085	-0.220064	7.72e-12	1316	0.00343711	TRUE	TUBGCP6
SYDE2..84144.	0.215581	0.220036	7.77e-12	1317	0.00343972	TRUE	SYDE2
PGRMC1..10857.	0.229098	0.220027	7.78e-12	1318	0.00344233	TRUE	PGRMC1
GOLGA7B..401647.	0.208065	0.219969	7.88e-12	1319	0.00344494	TRUE	GOLGA7B
AJUBA..84962.	0.243515	0.219894	8.02e-12	1320	0.00344756	TRUE	AJUBA
MYORG..57462.	0.203529	0.219858	8.08e-12	1321	0.00345017	TRUE	MYORG
CORIN..10699.	-0.202327	-0.219814	8.16e-12	1322	0.00345278	TRUE	CORIN
EPB41L4B..54566.	0.209182	0.219814	8.16e-12	1323	0.00345539	TRUE	EPB41L4B
GTF2IRD1..9569.	0.20961	0.219781	8.22e-12	1324	0.003458	TRUE	GTF2IRD1
PFN2..5217.	0.224836	0.219677	8.41e-12	1325	0.00346061	TRUE	PFN2
LARS2..23395.	-0.203635	-0.219621	8.52e-12	1326	0.00346323	TRUE	LARS2
HIST2H4B..554313.	0.175274	0.219592	8.57e-12	1327	0.00346584	TRUE	HIST2H4B
KCTD3..51133.	0.190901	0.219534	8.69e-12	1328	0.00346845	TRUE	KCTD3
LGALSL..29094.	0.202452	0.219507	8.74e-12	1329	0.00347106	TRUE	LGALSL
METAP1..23173.	-0.208955	-0.219475	8.8e-12	1330	0.00347367	TRUE	METAP1
TIMM23B..100652748.	-0.256065	-0.219408	8.93e-12	1331	0.00347628	TRUE	TIMM23B
ANK3..288.	0.205277	0.219385	8.98e-12	1332	0.0034789	TRUE	ANK3
SLC35B1..10237.	0.188541	0.219334	9.08e-12	1333	0.00348151	TRUE	SLC35B1
MMP15..4324.	0.220743	0.219304	9.14e-12	1334	0.00348412	TRUE	MMP15
TAX1BP1..8887.	0.250942	0.219295	9.16e-12	1335	0.00348673	TRUE	TAX1BP1
LHX1..3975.	0.205342	0.21928	9.19e-12	1336	0.00348934	TRUE	LHX1
RSRP1..57035.	-0.215837	-0.219263	9.22e-12	1337	0.00349196	TRUE	RSRP1
KRT86..3892.	0.198522	0.219218	9.32e-12	1338	0.00349457	TRUE	KRT86
CORO1A..11151.	-0.248033	-0.219209	9.33e-12	1339	0.00349718	TRUE	CORO1A
TMPRSS11E..28983.	0.194012	0.219133	9.49e-12	1340	0.00349979	TRUE	TMPRSS11E
SKIL..6498.	0.211072	0.219054	9.66e-12	1341	0.0035024	TRUE	SKIL
CCDC24..149473.	0.188236	0.218973	9.84e-12	1342	0.00350502	TRUE	CCDC24
JAML..120425.	-0.217204	-0.218953	9.88e-12	1343	0.00350763	TRUE	JAML
CAMKK2..10645.	-0.273079	-0.21893	9.93e-12	1344	0.00351024	TRUE	CAMKK2
ATP6AP1..537.	0.2019	0.21891	9.97e-12	1345	0.00351285	TRUE	ATP6AP1
TTLL1..25809.	-0.218503	-0.218874	1.01e-11	1346	0.00351546	TRUE	TTLL1
NPBWR1..2831.	0.202721	0.218868	1.01e-11	1347	0.00351807	TRUE	NPBWR1
KCNRG..283518.	-0.24107	-0.218811	1.02e-11	1348	0.00352068	TRUE	KCNRG
CYP24A1..1591.	0.197179	0.218742	1.04e-11	1349	0.0035233	TRUE	CYP24A1
MT.CO1..4512.	0.217145	0.218664	1.05e-11	1350	0.00352591	TRUE	MT
FAM3A..60343.	0.214725	0.218621	1.06e-11	1351	0.00352852	TRUE	FAM3A
TESMIN..9633.	0.157112	0.218608	1.07e-11	1352	0.00353113	TRUE	TESMIN
ADAM33..80332.	-0.17711	-0.218604	1.07e-11	1353	0.00353374	TRUE	ADAM33
KIF2A..3796.	-0.222956	-0.218562	1.08e-11	1354	0.00353636	TRUE	KIF2A
SNUPN..10073.	-0.219538	-0.218534	1.08e-11	1355	0.00353897	TRUE	SNUPN
ESD..2098.	-0.196798	-0.218456	1.1e-11	1356	0.00354158	TRUE	ESD
GPR156..165829.	0.197259	0.218444	1.11e-11	1357	0.00354419	TRUE	GPR156
LAIR1..3903.	-0.23639	-0.21839	1.12e-11	1358	0.0035468	TRUE	LAIR1
PLCXD2..257068.	0.226087	0.218373	1.12e-11	1359	0.00354942	TRUE	PLCXD2
KYNU..8942.	0.211921	0.218358	1.13e-11	1360	0.00355203	TRUE	KYNU
ANKLE1..126549.	-0.260055	-0.218331	1.13e-11	1361	0.00355464	TRUE	ANKLE1
SELPLG..6404.	-0.233246	-0.218317	1.14e-11	1362	0.00355725	TRUE	SELPLG
KRT17..3872.	0.225413	0.218313	1.14e-11	1363	0.00355986	TRUE	KRT17
BCL2..596.	-0.250185	-0.218292	1.14e-11	1364	0.00356247	TRUE	BCL2
ACTR2..10097.	-0.189003	-0.218242	1.16e-11	1365	0.00356509	TRUE	ACTR2
RANGRF..29098.	-0.211256	-0.218222	1.16e-11	1366	0.0035677	TRUE	RANGRF
ZNF112..7771.	0.210447	0.218167	1.18e-11	1367	0.00357031	TRUE	ZNF112
MIER1..57708.	-0.210661	-0.217978	1.23e-11	1368	0.00357292	TRUE	MIER1
PLA2G10..8399.	0.197454	0.217915	1.24e-11	1369	0.00357553	TRUE	PLA2G10
NUP155..9631.	0.200962	0.217872	1.25e-11	1370	0.00357815	TRUE	NUP155
MGAT5B..146664.	0.219337	0.217798	1.28e-11	1371	0.00358076	TRUE	MGAT5B
EZH1..2145.	-0.223487	-0.217792	1.28e-11	1372	0.00358337	TRUE	EZH1
DDB2..1643.	-0.218265	-0.217777	1.28e-11	1373	0.00358598	TRUE	DDB2
ELP2..55250.	-0.241622	-0.217741	1.29e-11	1374	0.00358859	TRUE	ELP2
CDRT1..374286.	0.203084	0.217696	1.3e-11	1375	0.0035912	TRUE	CDRT1
LCN2..3934.	0.209351	0.217647	1.32e-11	1376	0.00359382	TRUE	LCN2
MEF2B..100271849.	-0.219983	-0.217628	1.32e-11	1377	0.00359643	TRUE	MEF2B
ARAP3..64411.	0.244121	0.217606	1.33e-11	1378	0.00359904	TRUE	ARAP3
CNNM4..26504.	0.188553	0.217574	1.34e-11	1379	0.00360165	TRUE	CNNM4
PTGR1..22949.	0.238835	0.217537	1.35e-11	1380	0.00360426	TRUE	PTGR1
LSM11..134353.	-0.228578	-0.217468	1.37e-11	1381	0.00360687	TRUE	LSM11
TMEM182..130827.	0.204855	0.217462	1.37e-11	1382	0.00360949	TRUE	TMEM182
STRIP1..85369.	-0.224121	-0.217459	1.37e-11	1383	0.0036121	TRUE	STRIP1
EXOSC7..23016.	-0.200681	-0.217456	1.37e-11	1384	0.00361471	TRUE	EXOSC7
VPS39..23339.	-0.222488	-0.217429	1.38e-11	1385	0.00361732	TRUE	VPS39
SNRK..54861.	-0.235	-0.217419	1.39e-11	1386	0.00361993	TRUE	SNRK
LEMD1..93273.	0.180921	0.217417	1.39e-11	1387	0.00362255	TRUE	LEMD1
BBC3..27113.	-0.231571	-0.217399	1.39e-11	1388	0.00362516	TRUE	BBC3
MDK..4192.	0.205576	0.217292	1.43e-11	1389	0.00362777	TRUE	MDK
RIN2..54453.	0.242598	0.217246	1.44e-11	1390	0.00363038	TRUE	RIN2
CCDC81..60494.	-0.199296	-0.217206	1.45e-11	1391	0.00363299	TRUE	CCDC81
AREG..374.	0.205606	0.217161	1.47e-11	1392	0.0036356	TRUE	AREG
CCDC66..285331.	-0.222278	-0.217157	1.47e-11	1393	0.00363822	TRUE	CCDC66
CTAGE8..100142659.	0.209893	0.217076	1.49e-11	1394	0.00364083	TRUE	CTAGE8
ACP7..390928.	0.200199	0.217056	1.5e-11	1395	0.00364344	TRUE	ACP7
CCDC71..64925.	-0.205588	-0.217043	1.51e-11	1396	0.00364605	TRUE	CCDC71
LPIN3..64900.	0.210717	0.217037	1.51e-11	1397	0.00364866	TRUE	LPIN3
GCA..25801.	0.17581	0.217036	1.51e-11	1398	0.00365127	TRUE	GCA
ALDH3B1..221.	0.217066	0.216941	1.54e-11	1399	0.00365389	TRUE	ALDH3B1
ZBTB42..100128927.	0.165638	0.21694	1.54e-11	1400	0.0036565	TRUE	ZBTB42
SYNGAP1..8831.	-0.253548	-0.21688	1.56e-11	1401	0.00365911	TRUE	SYNGAP1
SH2B3..10019.	-0.185768	-0.216866	1.56e-11	1402	0.00366172	TRUE	SH2B3
SMIM27..100129250.	-0.231001	-0.21681	1.58e-11	1403	0.00366433	TRUE	SMIM27
RHBDL2..54933.	0.193232	0.21666	1.64e-11	1404	0.00366695	TRUE	RHBDL2
ATP2C2..9914.	0.200843	0.216586	1.66e-11	1405	0.00366956	TRUE	ATP2C2
NPRL2..10641.	-0.215376	-0.216489	1.7e-11	1406	0.00367217	TRUE	NPRL2
ADGRF3..165082.	-0.216338	-0.216472	1.71e-11	1407	0.00367478	TRUE	ADGRF3
DBNDD2..55861.	0.189734	0.216455	1.71e-11	1408	0.00367739	TRUE	DBNDD2
HACD2..201562.	0.228469	0.21617	1.82e-11	1409	0.00368	TRUE	HACD2
COMMD8..54951.	-0.172325	-0.216086	1.86e-11	1410	0.00368262	TRUE	COMMD8
CHI3L2..1117.	-0.203086	-0.216007	1.89e-11	1411	0.00368523	TRUE	CHI3L2
EXOC6B..23233.	0.231648	0.215998	1.89e-11	1412	0.00368784	TRUE	EXOC6B
ADORA2B..136.	0.240189	0.215935	1.92e-11	1413	0.00369045	TRUE	ADORA2B
MUC16..94025.	0.223477	0.21591	1.93e-11	1414	0.00369306	TRUE	MUC16
ERVMER34.1..100288413.	0.189949	0.21587	1.95e-11	1415	0.00369567	TRUE	ERVMER34
PODXL2..50512.	0.185883	0.215867	1.95e-11	1416	0.00369829	TRUE	PODXL2
CD9..928.	0.241224	0.215833	1.96e-11	1417	0.0037009	TRUE	CD9
SCRN1..9805.	0.216088	0.215815	1.97e-11	1418	0.00370351	TRUE	SCRN1
TMX2..51075.	0.180062	0.215801	1.98e-11	1419	0.00370612	TRUE	TMX2
SPATA17..128153.	0.18544	0.215778	1.99e-11	1420	0.00370873	TRUE	SPATA17
PDE4A..5141.	-0.230932	-0.21574	2e-11	1421	0.00371135	TRUE	PDE4A
SLC5A10..125206.	-0.191046	-0.215696	2.02e-11	1422	0.00371396	TRUE	SLC5A10
RBM42..79171.	0.182687	0.215569	2.08e-11	1423	0.00371657	TRUE	RBM42
PLLP..51090.	0.200758	0.215552	2.09e-11	1424	0.00371918	TRUE	PLLP
MCUB..55013.	-0.209141	-0.215515	2.1e-11	1425	0.00372179	TRUE	MCUB
SERPINB5..5268.	0.225545	0.215482	2.12e-11	1426	0.00372441	TRUE	SERPINB5
RPL4..6124.	-0.228205	-0.21537	2.17e-11	1427	0.00372702	TRUE	RPL4
CDK5RAP1..51654.	0.198259	0.215289	2.21e-11	1428	0.00372963	TRUE	CDK5RAP1
UPK3B..105375355.	0.195792	0.215288	2.21e-11	1429	0.00373224	TRUE	UPK3B
CBLC..23624.	0.196994	0.215284	2.21e-11	1430	0.00373485	TRUE	CBLC
MYOF..26509.	0.235013	0.215198	2.25e-11	1431	0.00373746	TRUE	MYOF
KLRG1..10219.	-0.232493	-0.215141	2.28e-11	1432	0.00374007	TRUE	KLRG1
NFS1..9054.	0.223831	0.215138	2.28e-11	1433	0.00374269	TRUE	NFS1
CHRNA5..1138.	0.187625	0.215105	2.3e-11	1434	0.0037453	TRUE	CHRNA5
PPP2R3B..28227.	-0.227895	-0.215103	2.3e-11	1435	0.00374791	TRUE	PPP2R3B
LIG4..3981.	-0.215139	-0.215048	2.33e-11	1436	0.00375052	TRUE	LIG4
DFFB..1677.	-0.215136	-0.215033	2.33e-11	1437	0.00375313	TRUE	DFFB
ALPP..250.	0.222633	0.214965	2.37e-11	1438	0.00375575	TRUE	ALPP
PSTPIP1..9051.	-0.238674	-0.214959	2.37e-11	1439	0.00375836	TRUE	PSTPIP1
ITPRIPL1..150771.	-0.233563	-0.214947	2.38e-11	1440	0.00376097	TRUE	ITPRIPL1
PAK6..56924.	0.174111	0.214913	2.4e-11	1441	0.00376358	TRUE	PAK6
ZNF423..23090.	-0.210815	-0.214886	2.41e-11	1442	0.00376619	TRUE	ZNF423
MARK1..4139.	0.189705	0.21488	2.41e-11	1443	0.00376881	TRUE	MARK1
SLC17A9..63910.	-0.197668	-0.214864	2.42e-11	1444	0.00377142	TRUE	SLC17A9
MND1..84057.	-0.225741	-0.214814	2.45e-11	1445	0.00377403	TRUE	MND1
BTG2..7832.	-0.235528	-0.214802	2.46e-11	1446	0.00377664	TRUE	BTG2
DDX17..10521.	-0.225687	-0.21478	2.47e-11	1447	0.00377925	TRUE	DDX17
PAPSS1..9061.	-0.2091	-0.214772	2.47e-11	1448	0.00378186	TRUE	PAPSS1
NAALADL1..10004.	-0.202628	-0.214759	2.48e-11	1449	0.00378448	TRUE	NAALADL1
GRB14..2888.	0.201433	0.214746	2.49e-11	1450	0.00378709	TRUE	GRB14
SLC35G5..83650.	-0.220773	-0.214739	2.49e-11	1451	0.0037897	TRUE	SLC35G5
PTK2..5747.	0.219884	0.214706	2.51e-11	1452	0.00379231	TRUE	PTK2
AFF2..2334.	-0.235048	-0.214659	2.53e-11	1453	0.00379492	TRUE	AFF2
LMX1B..4010.	0.172124	0.214607	2.56e-11	1454	0.00379753	TRUE	LMX1B
ACAN..176.	-0.190349	-0.214568	2.58e-11	1455	0.00380015	TRUE	ACAN
TRAPPC8..22878.	-0.236348	-0.21453	2.6e-11	1456	0.00380276	TRUE	TRAPPC8
FBXO10..26267.	-0.195726	-0.21451	2.62e-11	1457	0.00380537	TRUE	FBXO10
RSL24D1..51187.	-0.227962	-0.214485	2.63e-11	1458	0.00380798	TRUE	RSL24D1
PLEKHA1..59338.	0.216585	0.214448	2.65e-11	1459	0.00381059	TRUE	PLEKHA1
CRIP2..1397.	0.190962	0.214355	2.7e-11	1460	0.00381321	TRUE	CRIP2
ATP5F1D..513.	-0.228049	-0.214313	2.73e-11	1461	0.00381582	TRUE	ATP5F1D
GUF1..60558.	-0.197209	-0.214206	2.79e-11	1462	0.00381843	TRUE	GUF1
ANAPC4..29945.	-0.197865	-0.21417	2.82e-11	1463	0.00382104	TRUE	ANAPC4
KCNIP3..30818.	0.194719	0.214074	2.87e-11	1464	0.00382365	TRUE	KCNIP3
CERKL..375298.	-0.226559	-0.214065	2.88e-11	1465	0.00382626	TRUE	CERKL
EPHX4..253152.	0.208079	0.214061	2.88e-11	1466	0.00382888	TRUE	EPHX4
RHBDD1..84236.	-0.222537	-0.21403	2.9e-11	1467	0.00383149	TRUE	RHBDD1
DHRS3..9249.	0.223736	0.214023	2.91e-11	1468	0.0038341	TRUE	DHRS3
WDR6..11180.	-0.224779	-0.213959	2.95e-11	1469	0.00383671	TRUE	WDR6
SPTSSA..171546.	0.210179	0.213916	2.97e-11	1470	0.00383932	TRUE	SPTSSA
C15orf48..84419.	0.22096	0.213902	2.98e-11	1471	0.00384193	TRUE	C15orf48
TCIM..56892.	0.233932	0.213864	3.01e-11	1472	0.00384455	TRUE	TCIM
DNTT..1791.	-0.205651	-0.21374	3.09e-11	1473	0.00384716	TRUE	DNTT
DNAJC5..80331.	0.216617	0.213688	3.12e-11	1474	0.00384977	TRUE	DNAJC5
NKG7..4818.	-0.226606	-0.21343	3.3e-11	1475	0.00385238	TRUE	NKG7
PHLDA2..7262.	0.219004	0.213426	3.31e-11	1476	0.00385499	TRUE	PHLDA2
CCT5..22948.	0.219506	0.213397	3.33e-11	1477	0.00385761	TRUE	CCT5
SLC35C2..51006.	0.208148	0.213389	3.33e-11	1478	0.00386022	TRUE	SLC35C2
NRROS..375387.	-0.233201	-0.213362	3.35e-11	1479	0.00386283	TRUE	NRROS
BAG3..9531.	0.230682	0.213312	3.39e-11	1480	0.00386544	TRUE	BAG3
FAM216A..29902.	-0.218815	-0.213293	3.4e-11	1481	0.00386805	TRUE	FAM216A
ELN..2006.	-0.19565	-0.213282	3.41e-11	1482	0.00387066	TRUE	ELN
SYT8..90019.	0.200172	0.213273	3.42e-11	1483	0.00387328	TRUE	SYT8
HMHB1..57824.	-0.208211	-0.21327	3.42e-11	1484	0.00387589	TRUE	HMHB1
MTO1..25821.	-0.222601	-0.213269	3.42e-11	1485	0.0038785	TRUE	MTO1
MANBA..4126.	-0.211642	-0.213267	3.42e-11	1486	0.00388111	TRUE	MANBA
ANO1..55107.	0.190001	0.213107	3.54e-11	1487	0.00388372	TRUE	ANO1
C16orf54..283897.	-0.232256	-0.213054	3.58e-11	1488	0.00388633	TRUE	C16orf54
PSMD4..5710.	0.171682	0.213016	3.61e-11	1489	0.00388895	TRUE	PSMD4
ZFAND2A..90637.	0.185239	0.212924	3.68e-11	1490	0.00389156	TRUE	ZFAND2A
ACSF3..197322.	-0.215938	-0.212922	3.69e-11	1491	0.00389417	TRUE	ACSF3
YIF1A..10897.	0.203864	0.21289	3.71e-11	1492	0.00389678	TRUE	YIF1A
SEC22C..9117.	-0.200624	-0.212862	3.73e-11	1493	0.00389939	TRUE	SEC22C
KRT6A..3853.	0.21872	0.212735	3.84e-11	1494	0.00390201	TRUE	KRT6A
TBC1D5..9779.	-0.193129	-0.212728	3.84e-11	1495	0.00390462	TRUE	TBC1D5
SSBP2..23635.	-0.227951	-0.212726	3.84e-11	1496	0.00390723	TRUE	SSBP2
ACSS2..55902.	0.208639	0.21272	3.85e-11	1497	0.00390984	TRUE	ACSS2
ITGB8..3696.	0.217428	0.212674	3.89e-11	1498	0.00391245	TRUE	ITGB8
ZNF154..7710.	-0.211103	-0.212626	3.93e-11	1499	0.00391506	TRUE	ZNF154
ZNF407..55628.	-0.205339	-0.212597	3.95e-11	1500	0.00391768	TRUE	ZNF407
BEX2..84707.	0.179909	0.212548	3.99e-11	1501	0.00392029	TRUE	BEX2
TRPM7..54822.	-0.228327	-0.212512	4.02e-11	1502	0.0039229	TRUE	TRPM7
TM9SF4..9777.	0.22341	0.212511	4.03e-11	1503	0.00392551	TRUE	TM9SF4
MAPK15..225689.	0.144295	0.212413	4.11e-11	1504	0.00392812	TRUE	MAPK15
FCRLB..127943.	-0.191057	-0.21236	4.16e-11	1505	0.00393074	TRUE	FCRLB
PDZD2..23037.	0.182011	0.21231	4.2e-11	1506	0.00393335	TRUE	PDZD2
SLC52A2..79581.	0.16998	0.212288	4.22e-11	1507	0.00393596	TRUE	SLC52A2
PLEKHJ1..55111.	-0.244149	-0.212195	4.31e-11	1508	0.00393857	TRUE	PLEKHJ1
PHYKPL..85007.	-0.237073	-0.21192	4.57e-11	1509	0.00394118	TRUE	PHYKPL
ATP8A1..10396.	-0.229654	-0.21183	4.66e-11	1510	0.00394379	TRUE	ATP8A1
DNAH5..1767.	0.219835	0.211803	4.68e-11	1511	0.00394641	TRUE	DNAH5
CMTM8..152189.	0.199544	0.211749	4.74e-11	1512	0.00394902	TRUE	CMTM8
FGFR2..2263.	0.201556	0.211711	4.78e-11	1513	0.00395163	TRUE	FGFR2
ERMP1..79956.	0.190732	0.211641	4.85e-11	1514	0.00395424	TRUE	ERMP1
APOBEC3H..164668.	-0.212215	-0.211503	4.99e-11	1515	0.00395685	TRUE	APOBEC3H
CEP85L..387119.	-0.196985	-0.211429	5.07e-11	1516	0.00395946	TRUE	CEP85L
SYF2..25949.	-0.206293	-0.211416	5.09e-11	1517	0.00396208	TRUE	SYF2
ATG4C..84938.	-0.186087	-0.211401	5.1e-11	1518	0.00396469	TRUE	ATG4C
ATRN..8455.	0.226712	0.211373	5.14e-11	1519	0.0039673	TRUE	ATRN
OLFML2A..169611.	0.218081	0.211344	5.17e-11	1520	0.00396991	TRUE	OLFML2A
POU2F2..5452.	-0.217412	-0.211337	5.18e-11	1521	0.00397252	TRUE	POU2F2
PAG1..55824.	-0.19793	-0.211301	5.21e-11	1522	0.00397514	TRUE	PAG1
DPEP2..64174.	-0.225946	-0.2113	5.22e-11	1523	0.00397775	TRUE	DPEP2
NAMPT..10135.	0.213322	0.211246	5.28e-11	1524	0.00398036	TRUE	NAMPT
PLEKHH1..57475.	0.200266	0.211245	5.28e-11	1525	0.00398297	TRUE	PLEKHH1
PSMG3..84262.	0.179567	0.211204	5.32e-11	1526	0.00398558	TRUE	PSMG3
STEAP4..79689.	0.185783	0.211183	5.35e-11	1527	0.00398819	TRUE	STEAP4
IRF8..3394.	-0.209812	-0.211158	5.38e-11	1528	0.00399081	TRUE	IRF8
TCF12..6938.	-0.2212	-0.211123	5.42e-11	1529	0.00399342	TRUE	TCF12
TXNL4A..10907.	-0.228968	-0.211114	5.43e-11	1530	0.00399603	TRUE	TXNL4A
DOCK9..23348.	0.20349	0.211101	5.44e-11	1531	0.00399864	TRUE	DOCK9
GNPDA1..10007.	0.216172	0.211098	5.45e-11	1532	0.00400125	TRUE	GNPDA1
RBP1..5947.	0.168327	0.211082	5.46e-11	1533	0.00400386	TRUE	RBP1
MAP4K3..8491.	0.243129	0.211067	5.48e-11	1534	0.00400648	TRUE	MAP4K3
EIF4ENIF1..56478.	-0.226393	-0.211017	5.54e-11	1535	0.00400909	TRUE	EIF4ENIF1
PPP4R2..151987.	-0.182782	-0.210981	5.58e-11	1536	0.0040117	TRUE	PPP4R2
DHX30..22907.	-0.218118	-0.210936	5.64e-11	1537	0.00401431	TRUE	DHX30
STK10..6793.	-0.202984	-0.210908	5.67e-11	1538	0.00401692	TRUE	STK10
SS18L2..51188.	-0.194802	-0.210722	5.9e-11	1539	0.00401954	TRUE	SS18L2
VAMP1..6843.	-0.201666	-0.210715	5.91e-11	1540	0.00402215	TRUE	VAMP1
TRIR..79002.	-0.219605	-0.210685	5.95e-11	1541	0.00402476	TRUE	TRIR
SAP30..8819.	-0.244808	-0.210682	5.95e-11	1542	0.00402737	TRUE	SAP30
CORO2A..7464.	0.193543	0.210667	5.97e-11	1543	0.00402998	TRUE	CORO2A
HSD11B2..3291.	0.180833	0.21064	6e-11	1544	0.00403259	TRUE	HSD11B2
PLCD3..113026.	0.217218	0.210629	6.02e-11	1545	0.00403521	TRUE	PLCD3
PRIMPOL..201973.	-0.20644	-0.21059	6.07e-11	1546	0.00403782	TRUE	PRIMPOL
RPN1..6184.	0.201099	0.210583	6.08e-11	1547	0.00404043	TRUE	RPN1
ERG..2078.	-0.20105	-0.210449	6.25e-11	1548	0.00404304	TRUE	ERG
PKD2..5311.	-0.181479	-0.210433	6.27e-11	1549	0.00404565	TRUE	PKD2
MAPRE2..10982.	-0.212539	-0.210432	6.27e-11	1550	0.00404827	TRUE	MAPRE2
PDXP..57026.	-0.214514	-0.210431	6.28e-11	1551	0.00405088	TRUE	PDXP
IGLL5..100423062.	-0.215617	-0.21041	6.3e-11	1552	0.00405349	TRUE	IGLL5
PPP2R2C..5522.	0.183012	0.210405	6.31e-11	1553	0.0040561	TRUE	PPP2R2C
ARTN..9048.	0.201861	0.210385	6.34e-11	1554	0.00405871	TRUE	ARTN
CNOT9..9125.	-0.220126	-0.210344	6.39e-11	1555	0.00406133	TRUE	CNOT9
NSMAF..8439.	-0.210773	-0.210297	6.46e-11	1556	0.00406394	TRUE	NSMAF
CHKB..1120.	-0.217898	-0.210274	6.49e-11	1557	0.00406655	TRUE	CHKB
ZNF69..7620.	-0.201534	-0.210259	6.51e-11	1558	0.00406916	TRUE	ZNF69
C11orf87..399947.	-0.182639	-0.21024	6.54e-11	1559	0.00407177	TRUE	C11orf87
ELFN2..114794.	0.217064	0.210135	6.68e-11	1560	0.00407438	TRUE	ELFN2
SPCS3..60559.	-0.192809	-0.210118	6.71e-11	1561	0.00407699	TRUE	SPCS3
PINLYP..390940.	-0.192596	-0.2101	6.73e-11	1562	0.00407961	TRUE	PINLYP
RBM15B..29890.	-0.21718	-0.210081	6.76e-11	1563	0.00408222	TRUE	RBM15B
FAM180A..389558.	-0.18216	-0.210029	6.83e-11	1564	0.00408483	TRUE	FAM180A
PLXNA1..5361.	0.222636	0.209999	6.88e-11	1565	0.00408744	TRUE	PLXNA1
GNRH1..2796.	-0.215308	-0.209966	6.93e-11	1566	0.00409005	TRUE	GNRH1
P2RY11..5032.	-0.25114	-0.209944	6.96e-11	1567	0.00409267	TRUE	P2RY11
RAB20..55647.	0.222672	0.209913	7e-11	1568	0.00409528	TRUE	RAB20
WDR72..256764.	0.203836	0.209859	7.08e-11	1569	0.00409789	TRUE	WDR72
STX12..23673.	-0.172313	-0.209834	7.12e-11	1570	0.0041005	TRUE	STX12
CCDC120..90060.	0.151812	0.209822	7.14e-11	1571	0.00410311	TRUE	CCDC120
SMUG1..23583.	0.199853	0.20982	7.14e-11	1572	0.00410573	TRUE	SMUG1
ALG3..10195.	0.205748	0.209714	7.31e-11	1573	0.00410834	TRUE	ALG3
STT3B..201595.	-0.181058	-0.20967	7.37e-11	1574	0.00411095	TRUE	STT3B
ARHGEF7..8874.	-0.21614	-0.209551	7.56e-11	1575	0.00411356	TRUE	ARHGEF7
FGD2..221472.	-0.209857	-0.209544	7.57e-11	1576	0.00411617	TRUE	FGD2
ARPC2..10109.	-0.19001	-0.209488	7.66e-11	1577	0.00411878	TRUE	ARPC2
SH2D3A..10045.	0.17453	0.209476	7.68e-11	1578	0.0041214	TRUE	SH2D3A
FITM2..128486.	0.214611	0.209411	7.79e-11	1579	0.00412401	TRUE	FITM2
FFAR1..2864.	-0.214846	-0.209402	7.8e-11	1580	0.00412662	TRUE	FFAR1
IARS..3376.	-0.196685	-0.209386	7.83e-11	1581	0.00412923	TRUE	IARS
RPL6..6128.	-0.210761	-0.209349	7.89e-11	1582	0.00413184	TRUE	RPL6
NAA38..84316.	-0.214542	-0.209348	7.89e-11	1583	0.00413446	TRUE	NAA38
SRGN..5552.	-0.191579	-0.209319	7.94e-11	1584	0.00413707	TRUE	SRGN
NDUFC2..4718.	0.171264	0.209303	7.97e-11	1585	0.00413968	TRUE	NDUFC2
SERPINA1..5265.	0.196691	0.20928	8.01e-11	1586	0.00414229	TRUE	SERPINA1
MTMR6..9107.	-0.199025	-0.209217	8.12e-11	1587	0.0041449	TRUE	MTMR6
LHX6..26468.	0.172351	0.209215	8.12e-11	1588	0.00414751	TRUE	LHX6
ZGRF1..55345.	-0.231666	-0.20921	8.13e-11	1589	0.00415013	TRUE	ZGRF1
CBLN3..643866.	-0.216214	-0.209178	8.18e-11	1590	0.00415274	TRUE	CBLN3
CCNO..10309.	0.220549	0.209177	8.18e-11	1591	0.00415535	TRUE	CCNO
ZGPAT..84619.	0.201733	0.20905	8.41e-11	1592	0.00415796	TRUE	ZGPAT
IL17RC..84818.	0.208736	0.20891	8.66e-11	1593	0.00416057	TRUE	IL17RC
ORMDL2..29095.	0.207211	0.20891	8.66e-11	1594	0.00416318	TRUE	ORMDL2
RAB8B..51762.	-0.183432	-0.20887	8.73e-11	1595	0.0041658	TRUE	RAB8B
KLK10..5655.	0.188695	0.208845	8.78e-11	1596	0.00416841	TRUE	KLK10
LMOD1..25802.	-0.182069	-0.208842	8.78e-11	1597	0.00417102	TRUE	LMOD1
TMEM79..84283.	0.163461	0.208834	8.8e-11	1598	0.00417363	TRUE	TMEM79
NEDD4L..23327.	0.229414	0.208815	8.83e-11	1599	0.00417624	TRUE	NEDD4L
FBXO31..79791.	-0.201037	-0.208777	8.9e-11	1600	0.00417886	TRUE	FBXO31
CELSR2..1952.	0.170558	0.208742	8.97e-11	1601	0.00418147	TRUE	CELSR2
NCOA6..23054.	0.187216	0.208689	9.07e-11	1602	0.00418408	TRUE	NCOA6
TXNL1..9352.	-0.218684	-0.208688	9.07e-11	1603	0.00418669	TRUE	TXNL1
SH3BP4..23677.	0.239853	0.208585	9.27e-11	1604	0.0041893	TRUE	SH3BP4
PIK3CB..5291.	0.217924	0.20858	9.28e-11	1605	0.00419191	TRUE	PIK3CB
OCRL..4952.	0.213909	0.208526	9.39e-11	1606	0.00419453	TRUE	OCRL
CSE1L..1434.	0.228661	0.208523	9.39e-11	1607	0.00419714	TRUE	CSE1L
WIPF3..644150.	0.162407	0.20851	9.42e-11	1608	0.00419975	TRUE	WIPF3
FBXO2..26232.	0.184395	0.208446	9.55e-11	1609	0.00420236	TRUE	FBXO2
ZNF763..284390.	-0.209348	-0.20844	9.56e-11	1610	0.00420497	TRUE	ZNF763
RTL8C..8933.	0.210652	0.208437	9.57e-11	1611	0.00420758	TRUE	RTL8C
SPDEF..25803.	0.170536	0.208405	9.63e-11	1612	0.0042102	TRUE	SPDEF
HIST1H2BK..85236.	0.174449	0.208377	9.69e-11	1613	0.00421281	TRUE	HIST1H2BK
SYNPO2..171024.	-0.200418	-0.208342	9.76e-11	1614	0.00421542	TRUE	SYNPO2
AP4B1..10717.	-0.221901	-0.208336	9.77e-11	1615	0.00421803	TRUE	AP4B1
SYTL5..94122.	0.231482	0.208322	9.8e-11	1616	0.00422064	TRUE	SYTL5
CALM3..808.	-0.23571	-0.208322	9.8e-11	1617	0.00422326	TRUE	CALM3
ZSCAN31..64288.	0.221661	0.208284	9.88e-11	1618	0.00422587	TRUE	ZSCAN31
AHR..196.	0.21795	0.208246	9.96e-11	1619	0.00422848	TRUE	AHR
CGGBP1..8545.	-0.203737	-0.208244	9.96e-11	1620	0.00423109	TRUE	CGGBP1
TTC30B..150737.	0.177335	0.208236	9.98e-11	1621	0.0042337	TRUE	TTC30B
EIF3A..8661.	-0.216381	-0.208231	9.99e-11	1622	0.00423631	TRUE	EIF3A
PDGFRA..5156.	-0.162767	-0.208219	1e-10	1623	0.00423893	TRUE	PDGFRA
NKAPL..222698.	-0.192303	-0.208188	1.01e-10	1624	0.00424154	TRUE	NKAPL
FOXC1..2296.	0.181347	0.20818	1.01e-10	1625	0.00424415	TRUE	FOXC1
EIF1B..10289.	-0.177372	-0.208157	1.01e-10	1626	0.00424676	TRUE	EIF1B
KIAA0319..9856.	0.159237	0.208152	1.02e-10	1627	0.00424937	TRUE	KIAA0319
PROSER2..254427.	0.21413	0.208127	1.02e-10	1628	0.00425198	TRUE	PROSER2
CCDC28B..79140.	-0.218457	-0.208074	1.03e-10	1629	0.0042546	TRUE	CCDC28B
WDR93..56964.	0.175539	0.208067	1.03e-10	1630	0.00425721	TRUE	WDR93
KDELR2..11014.	0.2397	0.208045	1.04e-10	1631	0.00425982	TRUE	KDELR2
PLAC9..219348.	-0.199817	-0.207991	1.05e-10	1632	0.00426243	TRUE	PLAC9
C3orf38..285237.	-0.200003	-0.207991	1.05e-10	1633	0.00426504	TRUE	C3orf38
SPATA18..132671.	-0.201442	-0.207989	1.05e-10	1634	0.00426766	TRUE	SPATA18
RPL13..6137.	-0.212358	-0.207969	1.06e-10	1635	0.00427027	TRUE	RPL13
S100A11..6282.	0.228425	0.207895	1.07e-10	1636	0.00427288	TRUE	S100A11
IL9R..3581.	-0.225525	-0.207892	1.07e-10	1637	0.00427549	TRUE	IL9R
FAM114A2..10827.	-0.192564	-0.207889	1.07e-10	1638	0.0042781	TRUE	FAM114A2
RECK..8434.	-0.176597	-0.207808	1.09e-10	1639	0.00428072	TRUE	RECK
WNT4..54361.	0.184255	0.207805	1.09e-10	1640	0.00428333	TRUE	WNT4
DOK7..285489.	0.168751	0.20778	1.1e-10	1641	0.00428594	TRUE	DOK7
ATRIP..84126.	-0.221752	-0.207603	1.14e-10	1642	0.00428855	TRUE	ATRIP
SOX2..6657.	0.210123	0.207603	1.14e-10	1643	0.00429116	TRUE	SOX2
ANKRD9..122416.	0.189937	0.20755	1.15e-10	1644	0.00429377	TRUE	ANKRD9
CYP4B1..1580.	0.186623	0.207524	1.16e-10	1645	0.00429638	TRUE	CYP4B1
SPIRE1..56907.	0.220612	0.207521	1.16e-10	1646	0.004299	TRUE	SPIRE1
SLA..6503.	-0.230709	-0.207498	1.16e-10	1647	0.00430161	TRUE	SLA
ANXA2..302.	0.235229	0.20742	1.18e-10	1648	0.00430422	TRUE	ANXA2
APAF1..317.	-0.212672	-0.207409	1.19e-10	1649	0.00430683	TRUE	APAF1
WBP4..11193.	-0.174061	-0.207354	1.2e-10	1650	0.00430944	TRUE	WBP4
MRPS25..64432.	-0.184358	-0.207315	1.21e-10	1651	0.00431206	TRUE	MRPS25
KLHL31..401265.	0.195955	0.207312	1.21e-10	1652	0.00431467	TRUE	KLHL31
LY6E..4061.	0.173342	0.2073	1.21e-10	1653	0.00431728	TRUE	LY6E
TMEM92..162461.	0.194649	0.207271	1.22e-10	1654	0.00431989	TRUE	TMEM92
NRCAM..4897.	0.184063	0.207214	1.24e-10	1655	0.0043225	TRUE	NRCAM
ZFPL1..7542.	0.211416	0.207205	1.24e-10	1656	0.00432512	TRUE	ZFPL1
TRIM61..391712.	-0.197198	-0.207106	1.26e-10	1657	0.00432773	TRUE	TRIM61
CEP120..153241.	-0.209018	-0.207098	1.27e-10	1658	0.00433034	TRUE	CEP120
YBEY..54059.	-0.219127	-0.207078	1.27e-10	1659	0.00433295	TRUE	YBEY
MRPS24..64951.	0.199416	0.207067	1.27e-10	1660	0.00433556	TRUE	MRPS24
CCT6A..908.	0.205706	0.207053	1.28e-10	1661	0.00433817	TRUE	CCT6A
TRIM13..10206.	-0.225494	-0.207047	1.28e-10	1662	0.00434079	TRUE	TRIM13
LIMS2..55679.	-0.181218	-0.206922	1.31e-10	1663	0.0043434	TRUE	LIMS2
TRMT10A..93587.	-0.215689	-0.206917	1.32e-10	1664	0.00434601	TRUE	TRMT10A
MYL5..4636.	-0.226448	-0.206896	1.32e-10	1665	0.00434862	TRUE	MYL5
LST1..7940.	-0.224714	-0.206806	1.35e-10	1666	0.00435123	TRUE	LST1
RTF2..51507.	0.245016	0.206804	1.35e-10	1667	0.00435385	TRUE	RTF2
SLC2A8..29988.	0.196867	0.206799	1.35e-10	1668	0.00435646	TRUE	SLC2A8
PITPNM3..83394.	0.215331	0.206753	1.36e-10	1669	0.00435907	TRUE	PITPNM3
SNX24..28966.	0.211263	0.20674	1.36e-10	1670	0.00436168	TRUE	SNX24
S100A13..6284.	0.218348	0.206738	1.37e-10	1671	0.00436429	TRUE	S100A13
MKRN2..23609.	-0.200116	-0.206738	1.37e-10	1672	0.0043669	TRUE	MKRN2
MGAT4B..11282.	0.211171	0.206711	1.37e-10	1673	0.00436952	TRUE	MGAT4B
KCNS3..3790.	0.189721	0.206708	1.37e-10	1674	0.00437213	TRUE	KCNS3
RAB17..64284.	0.190316	0.206658	1.39e-10	1675	0.00437474	TRUE	RAB17
PROC..5624.	0.193856	0.206654	1.39e-10	1676	0.00437735	TRUE	PROC
CACNB4..785.	-0.200852	-0.206642	1.39e-10	1677	0.00437996	TRUE	CACNB4
NLRP1..22861.	-0.173832	-0.206599	1.41e-10	1678	0.00438257	TRUE	NLRP1
LMBR1L..55716.	-0.205891	-0.206498	1.44e-10	1679	0.00438519	TRUE	LMBR1L
MYO10..4651.	0.260979	0.206492	1.44e-10	1680	0.0043878	TRUE	MYO10
BRMS1..25855.	0.19442	0.206431	1.46e-10	1681	0.00439041	TRUE	BRMS1
MARCH6..10299.	0.178455	0.206347	1.48e-10	1682	0.00439302	TRUE	MARCHF6
GRHPR..9380.	-0.161932	-0.206343	1.48e-10	1683	0.00439563	TRUE	GRHPR
PHF11..51131.	-0.210555	-0.206309	1.49e-10	1684	0.00439825	TRUE	PHF11
GIMAP1..170575.	-0.210753	-0.206236	1.52e-10	1685	0.00440086	TRUE	GIMAP1
CDR2L..30850.	0.205313	0.206214	1.52e-10	1686	0.00440347	TRUE	CDR2L
ACER3..55331.	0.194696	0.206086	1.56e-10	1687	0.00440608	TRUE	ACER3
CLEC14A..161198.	-0.202352	-0.206056	1.57e-10	1688	0.00440869	TRUE	CLEC14A
GAL3ST4..79690.	-0.193628	-0.206038	1.58e-10	1689	0.0044113	TRUE	GAL3ST4
CLDN8..9073.	0.171478	0.206031	1.58e-10	1690	0.00441392	TRUE	CLDN8
ZNF831..128611.	-0.200664	-0.205957	1.61e-10	1691	0.00441653	TRUE	ZNF831
CKS1B..1163.	0.174632	0.205864	1.64e-10	1692	0.00441914	TRUE	CKS1B
GPR143..4935.	0.220848	0.205844	1.64e-10	1693	0.00442175	TRUE	GPR143
KRTCAP3..200634.	0.187583	0.205794	1.66e-10	1694	0.00442436	TRUE	KRTCAP3
GDI2..2665.	-0.209722	-0.205767	1.67e-10	1695	0.00442697	TRUE	GDI2
ERP27..121506.	0.200401	0.20571	1.69e-10	1696	0.00442959	TRUE	ERP27
RNLS..55328.	0.167185	0.205688	1.7e-10	1697	0.0044322	TRUE	RNLS
AFDN..4301.	0.211246	0.205682	1.7e-10	1698	0.00443481	TRUE	AFDN
HDAC11..79885.	0.201508	0.205677	1.7e-10	1699	0.00443742	TRUE	HDAC11
ABHD18..80167.	-0.26113	-0.205664	1.71e-10	1700	0.00444003	TRUE	ABHD18
COL4A6..1288.	0.220271	0.20565	1.71e-10	1701	0.00444265	TRUE	COL4A6
BCL9L..283149.	0.205651	0.205606	1.73e-10	1702	0.00444526	TRUE	BCL9L
EPHA1..2041.	0.187096	0.205604	1.73e-10	1703	0.00444787	TRUE	EPHA1
LRRN4CL..221091.	-0.159426	-0.205463	1.78e-10	1704	0.00445048	TRUE	LRRN4CL
YTHDC2..64848.	-0.216065	-0.205443	1.79e-10	1705	0.00445309	TRUE	YTHDC2
NR2F2..7026.	0.219274	0.205399	1.8e-10	1706	0.0044557	TRUE	NR2F2
PCBD1..5092.	0.177446	0.205382	1.81e-10	1707	0.00445832	TRUE	PCBD1
CLEC2D..29121.	-0.196201	-0.205343	1.82e-10	1708	0.00446093	TRUE	CLEC2D
IL36RN..26525.	0.19406	0.205291	1.84e-10	1709	0.00446354	TRUE	IL36RN
TBC1D1..23216.	-0.184201	-0.205275	1.85e-10	1710	0.00446615	TRUE	TBC1D1
MEX3C..51320.	-0.199308	-0.205251	1.86e-10	1711	0.00446876	TRUE	MEX3C
L3MBTL2..83746.	-0.211082	-0.205235	1.87e-10	1712	0.00447137	TRUE	L3MBTL2
DACT3..147906.	-0.201327	-0.20521	1.87e-10	1713	0.00447399	TRUE	DACT3
PCGF2..7703.	0.188601	0.205205	1.88e-10	1714	0.0044766	TRUE	PCGF2
PRELID3B..51012.	0.227726	0.205179	1.89e-10	1715	0.00447921	TRUE	PRELID3B
ARSK..153642.	-0.160159	-0.205157	1.9e-10	1716	0.00448182	TRUE	ARSK
C16orf87..388272.	-0.220849	-0.205135	1.9e-10	1717	0.00448443	TRUE	C16orf87
BOD1..91272.	0.191499	0.205127	1.91e-10	1718	0.00448705	TRUE	BOD1
RNASEH2B..79621.	-0.219283	-0.205114	1.91e-10	1719	0.00448966	TRUE	RNASEH2B
SRD5A1..6715.	0.209778	0.205095	1.92e-10	1720	0.00449227	TRUE	SRD5A1
SMG6..23293.	-0.162417	-0.205039	1.94e-10	1721	0.00449488	TRUE	SMG6
MRPS27..23107.	-0.205803	-0.205032	1.95e-10	1722	0.00449749	TRUE	MRPS27
DUSP2..1844.	-0.216536	-0.205025	1.95e-10	1723	0.0045001	TRUE	DUSP2
ARID5A..10865.	-0.213995	-0.205016	1.95e-10	1724	0.00450272	TRUE	ARID5A
RND3..390.	0.21635	0.204937	1.98e-10	1725	0.00450533	TRUE	RND3
PPARG..5468.	0.21994	0.204901	2e-10	1726	0.00450794	TRUE	PPARG
PIK3R1..5295.	-0.219609	-0.204838	2.02e-10	1727	0.00451055	TRUE	PIK3R1
TGFB2..7042.	0.200264	0.204826	2.03e-10	1728	0.00451316	TRUE	TGFB2
STIM2..57620.	-0.198068	-0.204814	2.03e-10	1729	0.00451577	TRUE	STIM2
IKZF5..64376.	-0.233105	-0.204811	2.04e-10	1730	0.00451839	TRUE	IKZF5
NIPSNAP3A..25934.	-0.207054	-0.204807	2.04e-10	1731	0.004521	TRUE	NIPSNAP3A
GULP1..51454.	0.214176	0.204794	2.04e-10	1732	0.00452361	TRUE	GULP1
STK3..6788.	0.201416	0.204779	2.05e-10	1733	0.00452622	TRUE	STK3
NMU..10874.	0.181808	0.204769	2.05e-10	1734	0.00452883	TRUE	NMU
H2AFJ..55766.	0.181507	0.204768	2.05e-10	1735	0.00453145	TRUE	H2AFJ
FGD6..55785.	0.189203	0.204757	2.06e-10	1736	0.00453406	TRUE	FGD6
ZNF557..79230.	-0.231214	-0.204677	2.09e-10	1737	0.00453667	TRUE	ZNF557
FLVCR2..55640.	0.197011	0.204643	2.11e-10	1738	0.00453928	TRUE	FLVCR2
LYPD5..284348.	0.168878	0.204573	2.14e-10	1739	0.00454189	TRUE	LYPD5
CD81..975.	-0.168907	-0.204558	2.15e-10	1740	0.0045445	TRUE	CD81
MGST1..4257.	0.210863	0.204529	2.16e-10	1741	0.00454712	TRUE	MGST1
RPL7A..6130.	-0.214269	-0.204518	2.16e-10	1742	0.00454973	TRUE	RPL7A
RANBP3..8498.	-0.201788	-0.204489	2.18e-10	1743	0.00455234	TRUE	RANBP3
CLDN23..137075.	0.191098	0.204458	2.19e-10	1744	0.00455495	TRUE	CLDN23
CBR4..84869.	-0.240185	-0.204413	2.21e-10	1745	0.00455756	TRUE	CBR4
FERMT1..55612.	0.203435	0.204381	2.23e-10	1746	0.00456018	TRUE	FERMT1
FBXO27..126433.	0.191666	0.204351	2.24e-10	1747	0.00456279	TRUE	FBXO27
ACAD11..84129.	-0.173286	-0.204326	2.25e-10	1748	0.0045654	TRUE	ACAD11
NUCB2..4925.	-0.198099	-0.204272	2.28e-10	1749	0.00456801	TRUE	NUCB2
SULT1A4..445329.	0.177888	0.204213	2.3e-10	1750	0.00457062	TRUE	SULT1A4
FAM131A..131408.	0.196012	0.204156	2.33e-10	1751	0.00457323	TRUE	FAM131A
CTBP2..1488.	0.184098	0.204134	2.34e-10	1752	0.00457585	TRUE	CTBP2
KLF4..9314.	0.210828	0.204114	2.35e-10	1753	0.00457846	TRUE	KLF4
CLEC17A..388512.	-0.196522	-0.203978	2.42e-10	1754	0.00458107	TRUE	CLEC17A
APBA3..9546.	-0.236225	-0.203933	2.44e-10	1755	0.00458368	TRUE	APBA3
MROH8..140699.	-0.211746	-0.20384	2.49e-10	1756	0.00458629	TRUE	MROH8
C2orf70..339778.	0.172277	0.20384	2.49e-10	1757	0.0045889	TRUE	C2orf70
EPB41L4A..64097.	0.1529	0.203811	2.5e-10	1758	0.00459152	TRUE	EPB41L4A
FJX1..24147.	0.193857	0.203796	2.51e-10	1759	0.00459413	TRUE	FJX1
FUCA2..2519.	0.218117	0.203691	2.56e-10	1760	0.00459674	TRUE	FUCA2
HHIP..64399.	-0.17933	-0.203641	2.59e-10	1761	0.00459935	TRUE	HHIP
IPO5..3843.	-0.192619	-0.203607	2.61e-10	1762	0.00460196	TRUE	IPO5
DMTN..2039.	0.150285	0.203597	2.61e-10	1763	0.00460458	TRUE	DMTN
TRIM45..80263.	0.191295	0.20357	2.63e-10	1764	0.00460719	TRUE	TRIM45
MBOAT1..154141.	0.198123	0.203544	2.64e-10	1765	0.0046098	TRUE	MBOAT1
VWA7..80737.	0.183644	0.203535	2.65e-10	1766	0.00461241	TRUE	VWA7
MRPS17..51373.	0.187643	0.203524	2.65e-10	1767	0.00461502	TRUE	MRPS17
CENPBD1..92806.	0.164085	0.203483	2.68e-10	1768	0.00461764	TRUE	CENPBD1
IMPACT..55364.	0.199565	0.203473	2.68e-10	1769	0.00462025	TRUE	IMPACT
TEX10..54881.	-0.176067	-0.20343	2.71e-10	1770	0.00462286	TRUE	TEX10
CST6..1474.	0.184301	0.203424	2.71e-10	1771	0.00462547	TRUE	CST6
ARMC3..219681.	0.175303	0.203401	2.72e-10	1772	0.00462808	TRUE	ARMC3
ZNF430..80264.	-0.203185	-0.203351	2.75e-10	1773	0.00463069	TRUE	ZNF430
PVRIG..79037.	-0.204694	-0.203302	2.78e-10	1774	0.0046333	TRUE	PVRIG
PDZD11..51248.	0.212037	0.203296	2.78e-10	1775	0.00463592	TRUE	PDZD11
TMEM45B..120224.	0.18803	0.203291	2.78e-10	1776	0.00463853	TRUE	TMEM45B
LIMD2..80774.	-0.208121	-0.203281	2.79e-10	1777	0.00464114	TRUE	LIMD2
VIPR1..7433.	0.166696	0.203259	2.8e-10	1778	0.00464375	TRUE	VIPR1
MEI1..150365.	-0.227062	-0.203186	2.84e-10	1779	0.00464636	TRUE	MEI1
HELZ2..85441.	0.204655	0.203181	2.85e-10	1780	0.00464898	TRUE	HELZ2
PLOD2..5352.	0.215327	0.203138	2.87e-10	1781	0.00465159	TRUE	PLOD2
ZC3H7B..23264.	-0.201211	-0.203132	2.88e-10	1782	0.0046542	TRUE	ZC3H7B
OVOL1..5017.	0.190506	0.203117	2.88e-10	1783	0.00465681	TRUE	OVOL1
FZD6..8323.	0.204093	0.203025	2.94e-10	1784	0.00465942	TRUE	FZD6
KCNJ14..3770.	0.175692	0.202927	3e-10	1785	0.00466204	TRUE	KCNJ14
AFF3..3899.	-0.206662	-0.202918	3e-10	1786	0.00466465	TRUE	AFF3
NR2C2..7182.	-0.196661	-0.202902	3.01e-10	1787	0.00466726	TRUE	NR2C2
B4GALNT3..283358.	0.203356	0.202899	3.02e-10	1788	0.00466987	TRUE	B4GALNT3
NECAB3..63941.	0.192862	0.20286	3.04e-10	1789	0.00467248	TRUE	NECAB3
RNF126..55658.	-0.19885	-0.202852	3.05e-10	1790	0.00467509	TRUE	RNF126
PTPRH..5794.	0.216599	0.202848	3.05e-10	1791	0.00467771	TRUE	PTPRH
P2RY6..5031.	0.196557	0.202831	3.06e-10	1792	0.00468032	TRUE	P2RY6
EBF2..64641.	-0.184126	-0.202798	3.08e-10	1793	0.00468293	TRUE	EBF2
PRR15..222171.	0.189732	0.202793	3.08e-10	1794	0.00468554	TRUE	PRR15
PIK3AP1..118788.	-0.217941	-0.202766	3.1e-10	1795	0.00468815	TRUE	PIK3AP1
SLCO2A1..6578.	0.181796	0.202738	3.12e-10	1796	0.00469077	TRUE	SLCO2A1
SSC4D..136853.	0.171148	0.202735	3.12e-10	1797	0.00469338	TRUE	SSC4D
BHLHE41..79365.	0.233305	0.202724	3.13e-10	1798	0.00469599	TRUE	BHLHE41
WRN..7486.	-0.212962	-0.202684	3.15e-10	1799	0.0046986	TRUE	WRN
ITPKC..80271.	0.178543	0.202644	3.18e-10	1800	0.00470121	TRUE	ITPKC
ADAT2..134637.	-0.205881	-0.202609	3.2e-10	1801	0.00470382	TRUE	ADAT2
ASB9..140462.	0.219138	0.202604	3.2e-10	1802	0.00470644	TRUE	ASB9
CCDC9B..388115.	0.23188	0.202601	3.21e-10	1803	0.00470905	TRUE	CCDC9B
ATM..472.	-0.187109	-0.202588	3.21e-10	1804	0.00471166	TRUE	ATM
P2RY10..27334.	-0.209748	-0.202446	3.31e-10	1805	0.00471427	TRUE	P2RY10
RUBCNL..80183.	-0.199831	-0.202441	3.31e-10	1806	0.00471688	TRUE	RUBCNL
CYSRT1..375791.	0.152634	0.202404	3.34e-10	1807	0.00471949	TRUE	CYSRT1
CYP26B1..56603.	0.18445	0.202354	3.37e-10	1808	0.00472211	TRUE	CYP26B1
DPH5..51611.	-0.173818	-0.202347	3.38e-10	1809	0.00472472	TRUE	DPH5
AKAP11..11215.	-0.189825	-0.202318	3.4e-10	1810	0.00472733	TRUE	AKAP11
MPG..4350.	-0.183242	-0.202155	3.51e-10	1811	0.00472994	TRUE	MPG
APOBEC3G..60489.	-0.213186	-0.202145	3.52e-10	1812	0.00473255	TRUE	APOBEC3G
TYK2..7297.	-0.21862	-0.202098	3.55e-10	1813	0.00473517	TRUE	TYK2
OR11H7..390441.	0.213569	0.202098	3.55e-10	1814	0.00473778	TRUE	OR11H7
CD80..941.	-0.197849	-0.202057	3.58e-10	1815	0.00474039	TRUE	CD80
CDKN2AIP..55602.	-0.211609	-0.20204	3.59e-10	1816	0.004743	TRUE	CDKN2AIP
PI3..5266.	0.204976	0.202025	3.6e-10	1817	0.00474561	TRUE	PI3
DNAJC22..79962.	0.194718	0.202013	3.61e-10	1818	0.00474822	TRUE	DNAJC22
NLRP6..171389.	-0.203881	-0.202004	3.62e-10	1819	0.00475084	TRUE	NLRP6
FADD..8772.	0.187594	0.202003	3.62e-10	1820	0.00475345	TRUE	FADD
ELF5..2001.	0.167353	0.201988	3.63e-10	1821	0.00475606	TRUE	ELF5
LGR4..55366.	0.20451	0.20193	3.67e-10	1822	0.00475867	TRUE	LGR4
KAT6B..23522.	-0.230095	-0.201913	3.69e-10	1823	0.00476128	TRUE	KAT6B
FAM160B1..57700.	-0.18474	-0.201837	3.75e-10	1824	0.00476389	TRUE	FAM160B1
CYLD..1540.	-0.184661	-0.201607	3.92e-10	1825	0.00476651	TRUE	CYLD
SURF2..6835.	0.148745	0.201587	3.94e-10	1826	0.00476912	TRUE	SURF2
C7orf50..84310.	0.167313	0.201541	3.98e-10	1827	0.00477173	TRUE	C7orf50
BCL7A..605.	-0.22302	-0.201528	3.99e-10	1828	0.00477434	TRUE	BCL7A
CLIP4..79745.	0.231142	0.201454	4.05e-10	1829	0.00477695	TRUE	CLIP4
HDDC2..51020.	-0.229945	-0.201452	4.05e-10	1830	0.00477957	TRUE	HDDC2
TRABD..80305.	-0.233383	-0.201427	4.07e-10	1831	0.00478218	TRUE	TRABD
TMEM56..148534.	0.171484	0.201373	4.12e-10	1832	0.00478479	TRUE	TMEM56
BAIAP3..8938.	0.167071	0.201353	4.13e-10	1833	0.0047874	TRUE	BAIAP3
C3orf67..200844.	0.181288	0.201347	4.14e-10	1834	0.00479001	TRUE	C3orf67
TM4SF19..116211.	0.22453	0.201287	4.19e-10	1835	0.00479262	TRUE	TM4SF19
TRIP13..9319.	0.211447	0.201238	4.23e-10	1836	0.00479524	TRUE	TRIP13
PTEN..5728.	-0.220134	-0.201208	4.26e-10	1837	0.00479785	TRUE	PTEN
SPNS3..201305.	-0.222158	-0.201168	4.29e-10	1838	0.00480046	TRUE	SPNS3
TNFAIP8..25816.	-0.216782	-0.201144	4.31e-10	1839	0.00480307	TRUE	TNFAIP8
RAPGEF6..51735.	-0.209595	-0.201129	4.32e-10	1840	0.00480568	TRUE	RAPGEF6
PPP1R9A..55607.	0.143061	0.201129	4.32e-10	1841	0.00480829	TRUE	PPP1R9A
COL6A3..1293.	-0.146553	-0.201113	4.34e-10	1842	0.00481091	TRUE	COL6A3
DIS3..22894.	-0.188147	-0.201095	4.35e-10	1843	0.00481352	TRUE	DIS3
CD86..942.	-0.201125	-0.20108	4.37e-10	1844	0.00481613	TRUE	CD86
BTN3A3..10384.	-0.177911	-0.200954	4.48e-10	1845	0.00481874	TRUE	BTN3A3
PLCB2..5330.	-0.216327	-0.200916	4.51e-10	1846	0.00482135	TRUE	PLCB2
PSENEN..55851.	0.164589	0.200903	4.53e-10	1847	0.00482397	TRUE	PSENEN
THOP1..7064.	-0.212267	-0.200868	4.56e-10	1848	0.00482658	TRUE	THOP1
FUT11..170384.	-0.185689	-0.200809	4.61e-10	1849	0.00482919	TRUE	FUT11
FBXO32..114907.	0.223396	0.200691	4.72e-10	1850	0.0048318	TRUE	FBXO32
SPAG16..79582.	0.182779	0.200677	4.74e-10	1851	0.00483441	TRUE	SPAG16
KCTD1..284252.	0.196911	0.200655	4.76e-10	1852	0.00483703	TRUE	KCTD1
CCDC174..51244.	-0.203604	-0.200655	4.76e-10	1853	0.00483964	TRUE	CCDC174
PARP11..57097.	-0.201811	-0.200642	4.77e-10	1854	0.00484225	TRUE	PARP11
RHBDD2..57414.	0.186944	0.20055	4.86e-10	1855	0.00484486	TRUE	RHBDD2
RXRA..6256.	0.187882	0.20052	4.89e-10	1856	0.00484747	TRUE	RXRA
NDUFAF1..51103.	-0.224567	-0.20051	4.9e-10	1857	0.00485008	TRUE	NDUFAF1
GTPBP1..9567.	-0.216203	-0.200491	4.92e-10	1858	0.00485269	TRUE	GTPBP1
UPK1B..7348.	0.186685	0.200466	4.94e-10	1859	0.00485531	TRUE	UPK1B
ZNF800..168850.	-0.196583	-0.200465	4.95e-10	1860	0.00485792	TRUE	ZNF800
RPS18..6222.	-0.190606	-0.200354	5.06e-10	1861	0.00486053	TRUE	RPS18
ABCB9..23457.	0.182377	0.200348	5.06e-10	1862	0.00486314	TRUE	ABCB9
CRYBG2..55057.	0.182622	0.200303	5.11e-10	1863	0.00486575	TRUE	CRYBG2
C17orf113..110806298.	0.123886	0.200291	5.12e-10	1864	0.00486837	TRUE	C17orf113
AKR1B10..57016.	0.222652	0.200275	5.14e-10	1865	0.00487098	TRUE	AKR1B10
TMEM238..388564.	0.141289	0.20019	5.23e-10	1866	0.00487359	TRUE	TMEM238
DDR2..4921.	-0.17751	-0.200178	5.24e-10	1867	0.0048762	TRUE	DDR2
PIK3R6..146850.	-0.211513	-0.200132	5.29e-10	1868	0.00487881	TRUE	PIK3R6
MARCH8..220972.	-0.218493	-0.200111	5.31e-10	1869	0.00488143	TRUE	MARCHF8
XPO6..23214.	-0.183221	-0.200095	5.33e-10	1870	0.00488404	TRUE	XPO6
BUB3..9184.	-0.215865	-0.200052	5.37e-10	1871	0.00488665	TRUE	BUB3
FAM199X..139231.	0.211095	0.200049	5.38e-10	1872	0.00488926	TRUE	FAM199X
GNG2..54331.	-0.199855	-0.199945	5.49e-10	1873	0.00489187	TRUE	GNG2
C5orf38..153571.	0.206733	0.199929	5.51e-10	1874	0.00489448	TRUE	C5orf38
VNN2..8875.	-0.199463	-0.199865	5.58e-10	1875	0.0048971	TRUE	VNN2
JPH1..56704.	0.183423	0.199819	5.63e-10	1876	0.00489971	TRUE	JPH1
RAB27B..5874.	0.191864	0.199717	5.75e-10	1877	0.00490232	TRUE	RAB27B
KRT83..3889.	0.167229	0.199712	5.76e-10	1878	0.00490493	TRUE	KRT83
CYP4F3..4051.	0.183141	0.199682	5.79e-10	1879	0.00490754	TRUE	CYP4F3
RAB38..23682.	0.197694	0.199506	6e-10	1880	0.00491016	TRUE	RAB38
ARHGAP25..9938.	-0.22223	-0.199417	6.11e-10	1881	0.00491277	TRUE	ARHGAP25
PHEX..5251.	0.180829	0.199414	6.11e-10	1882	0.00491538	TRUE	PHEX
FAM193A..8603.	-0.217127	-0.199373	6.16e-10	1883	0.00491799	TRUE	FAM193A
GREB1L..80000.	0.180671	0.199338	6.21e-10	1884	0.0049206	TRUE	GREB1L
NTN4..59277.	0.216477	0.199317	6.23e-10	1885	0.00492321	TRUE	NTN4
C3..718.	0.212118	0.199274	6.29e-10	1886	0.00492582	TRUE	C3
MAP4..4134.	-0.142182	-0.199264	6.3e-10	1887	0.00492844	TRUE	MAP4
NEXN..91624.	-0.150332	-0.199249	6.32e-10	1888	0.00493105	TRUE	NEXN
UPF2..26019.	-0.206416	-0.19922	6.35e-10	1889	0.00493366	TRUE	UPF2
PSMB10..5699.	-0.202991	-0.199216	6.36e-10	1890	0.00493627	TRUE	PSMB10
CCDC62..84660.	-0.200024	-0.199192	6.39e-10	1891	0.00493888	TRUE	CCDC62
KCNMB3..27094.	0.136873	0.199189	6.39e-10	1892	0.0049415	TRUE	KCNMB3
NAV2..89797.	0.219473	0.199156	6.44e-10	1893	0.00494411	TRUE	NAV2
LCK..3932.	-0.197377	-0.199127	6.47e-10	1894	0.00494672	TRUE	LCK
JCHAIN..3512.	-0.208016	-0.199077	6.54e-10	1895	0.00494933	TRUE	JCHAIN
FSTL4..23105.	0.165834	0.19907	6.55e-10	1896	0.00495194	TRUE	FSTL4
SDR42E1..93517.	0.185038	0.199049	6.58e-10	1897	0.00495456	TRUE	SDR42E1
YAP1..10413.	0.238659	0.199026	6.61e-10	1898	0.00495717	TRUE	YAP1
LDB2..9079.	-0.150216	-0.198962	6.69e-10	1899	0.00495978	TRUE	LDB2
GIMAP6..474344.	-0.212983	-0.198959	6.7e-10	1900	0.00496239	TRUE	GIMAP6
RERG..85004.	0.140759	0.198949	6.71e-10	1901	0.004965	TRUE	RERG
SEC14L2..23541.	0.222399	0.198943	6.72e-10	1902	0.00496761	TRUE	SEC14L2
SYTL4..94121.	0.170869	0.198913	6.76e-10	1903	0.00497023	TRUE	SYTL4
PEX13..5194.	0.192176	0.198872	6.81e-10	1904	0.00497284	TRUE	PEX13
CD180..4064.	-0.1899	-0.198859	6.83e-10	1905	0.00497545	TRUE	CD180
EXOSC6..118460.	-0.212257	-0.198851	6.84e-10	1906	0.00497806	TRUE	EXOSC6
AGER..177.	-0.235384	-0.198842	6.85e-10	1907	0.00498067	TRUE	AGER
DPYSL2..1808.	-0.171005	-0.198826	6.88e-10	1908	0.00498328	TRUE	DPYSL2
SIX1..6495.	0.182384	0.198777	6.94e-10	1909	0.0049859	TRUE	SIX1
ARHGEF37..389337.	0.161766	0.198755	6.97e-10	1910	0.00498851	TRUE	ARHGEF37
POLR3GL..84265.	-0.211747	-0.19867	7.09e-10	1911	0.00499112	TRUE	POLR3GL
TAF5..6877.	-0.228209	-0.198648	7.13e-10	1912	0.00499373	TRUE	TAF5
AKR1A1..10327.	-0.209172	-0.198609	7.18e-10	1913	0.00499634	TRUE	AKR1A1
CALB2..794.	0.194829	0.19852	7.31e-10	1914	0.00499896	TRUE	CALB2
RAB33B..83452.	-0.233646	-0.198469	7.38e-10	1915	0.00500157	TRUE	RAB33B
KRT81..3887.	0.206696	0.198414	7.47e-10	1916	0.00500418	TRUE	KRT81
MRPL21..219927.	0.17493	0.198414	7.47e-10	1917	0.00500679	TRUE	MRPL21
GCLC..2729.	0.167476	0.198405	7.48e-10	1918	0.0050094	TRUE	GCLC
AAR2..25980.	0.193907	0.198392	7.5e-10	1919	0.00501201	TRUE	AAR2
WDR19..57728.	-0.191152	-0.19831	7.62e-10	1920	0.00501463	TRUE	WDR19
MDM4..4194.	-0.226931	-0.198286	7.66e-10	1921	0.00501724	TRUE	MDM4
GGA1..26088.	-0.209847	-0.198283	7.66e-10	1922	0.00501985	TRUE	GGA1
TLR5..7100.	0.166287	0.198262	7.7e-10	1923	0.00502246	TRUE	TLR5
TTC12..54970.	0.184011	0.198259	7.7e-10	1924	0.00502507	TRUE	TTC12
FOLR2..2350.	-0.203582	-0.198219	7.76e-10	1925	0.00502768	TRUE	FOLR2
KRT16..3868.	0.204318	0.198213	7.77e-10	1926	0.0050303	TRUE	KRT16
HIBADH..11112.	0.22939	0.198206	7.78e-10	1927	0.00503291	TRUE	HIBADH
TRAPPC2..6399.	-0.2183	-0.198183	7.82e-10	1928	0.00503552	TRUE	TRAPPC2
LYPD6..130574.	0.19567	0.198145	7.88e-10	1929	0.00503813	TRUE	LYPD6
SMPDL3B..27293.	0.1591	0.198124	7.91e-10	1930	0.00504074	TRUE	SMPDL3B
RIBC2..26150.	0.150802	0.198107	7.94e-10	1931	0.00504336	TRUE	RIBC2
STRADA..92335.	-0.206563	-0.198105	7.94e-10	1932	0.00504597	TRUE	STRADA
EFNB2..1948.	0.217938	0.198089	7.97e-10	1933	0.00504858	TRUE	EFNB2
EPHB4..2050.	0.214438	0.198075	7.99e-10	1934	0.00505119	TRUE	EPHB4
PLD1..5337.	0.23043	0.198052	8.03e-10	1935	0.0050538	TRUE	PLD1
RDH13..112724.	0.146951	0.198046	8.04e-10	1936	0.00505641	TRUE	RDH13
GRIP1..23426.	0.165242	0.198044	8.04e-10	1937	0.00505903	TRUE	GRIP1
SEPT11..55752.	-0.163423	-0.198018	8.08e-10	1938	0.00506164	TRUE	SEPTIN11
TTI2..80185.	-0.20912	-0.198014	8.09e-10	1939	0.00506425	TRUE	TTI2
ZBED8..63920.	0.187307	0.198014	8.09e-10	1940	0.00506686	TRUE	ZBED8
TMEM61..199964.	0.194449	0.198006	8.1e-10	1941	0.00506947	TRUE	TMEM61
SOX15..6665.	0.183739	0.198005	8.1e-10	1942	0.00507208	TRUE	SOX15
CTSL..1514.	0.211903	0.197988	8.13e-10	1943	0.0050747	TRUE	CTSL
BLVRA..644.	0.200877	0.19796	8.17e-10	1944	0.00507731	TRUE	BLVRA
ICAM3..3385.	-0.225107	-0.197959	8.18e-10	1945	0.00507992	TRUE	ICAM3
PTPN20..26095.	0.169444	0.197949	8.19e-10	1946	0.00508253	TRUE	PTPN20
CARD8..22900.	-0.233969	-0.197899	8.27e-10	1947	0.00508514	TRUE	CARD8
EPS8..2059.	0.22211	0.197869	8.32e-10	1948	0.00508776	TRUE	EPS8
NOS1AP..9722.	0.178956	0.197845	8.36e-10	1949	0.00509037	TRUE	NOS1AP
BCL2L1..598.	0.182576	0.197764	8.5e-10	1950	0.00509298	TRUE	BCL2L1
CXCR4..7852.	-0.225901	-0.197644	8.71e-10	1951	0.00509559	TRUE	CXCR4
MAX..4149.	-0.214634	-0.197634	8.72e-10	1952	0.0050982	TRUE	MAX
CAMSAP2..23271.	0.195253	0.19763	8.73e-10	1953	0.00510081	TRUE	CAMSAP2
LYPD1..116372.	0.192421	0.197624	8.74e-10	1954	0.00510343	TRUE	LYPD1
RNF39..80352.	0.141616	0.197611	8.76e-10	1955	0.00510604	TRUE	RNF39
EPHB2..2048.	0.205573	0.197607	8.77e-10	1956	0.00510865	TRUE	EPHB2
ZNF490..57474.	-0.209104	-0.197591	8.8e-10	1957	0.00511126	TRUE	ZNF490
PXMP4..11264.	0.181826	0.197567	8.84e-10	1958	0.00511387	TRUE	PXMP4
WDR36..134430.	-0.208979	-0.19754	8.89e-10	1959	0.00511649	TRUE	WDR36
GID4..79018.	-0.168517	-0.197524	8.92e-10	1960	0.0051191	TRUE	GID4
RAB13..5872.	0.21611	0.197518	8.93e-10	1961	0.00512171	TRUE	RAB13
BTAF1..9044.	-0.205778	-0.197516	8.93e-10	1962	0.00512432	TRUE	BTAF1
ZNF397..84307.	-0.23185	-0.197496	8.97e-10	1963	0.00512693	TRUE	ZNF397
YAE1..57002.	0.19218	0.197484	8.99e-10	1964	0.00512955	TRUE	YAE1
SPON2..10417.	-0.171004	-0.19748	8.99e-10	1965	0.00513216	TRUE	SPON2
NDRG2..57447.	0.164052	0.197446	9.06e-10	1966	0.00513477	TRUE	NDRG2
TM9SF1..10548.	0.208736	0.19743	9.08e-10	1967	0.00513738	TRUE	TM9SF1
SLC6A8..6535.	0.18994	0.197397	9.14e-10	1968	0.00513999	TRUE	SLC6A8
CRYBB3..1417.	0.21597	0.197367	9.2e-10	1969	0.0051426	TRUE	CRYBB3
C4orf3..401152.	-0.202508	-0.197331	9.26e-10	1970	0.00514521	TRUE	C4orf3
GAS2L3..283431.	0.189462	0.197234	9.44e-10	1971	0.00514783	TRUE	GAS2L3
SMOX..54498.	0.212013	0.197228	9.46e-10	1972	0.00515044	TRUE	SMOX
CRADD..8738.	-0.198592	-0.197157	9.59e-10	1973	0.00515305	TRUE	CRADD
CCIN..881.	-0.137421	-0.197137	9.63e-10	1974	0.00515566	TRUE	CCIN
BCAR3..8412.	0.225432	0.197132	9.64e-10	1975	0.00515827	TRUE	BCAR3
FTH1..2495.	0.222173	0.197111	9.68e-10	1976	0.00516089	TRUE	FTH1
FAM122A..116224.	-0.200235	-0.197106	9.69e-10	1977	0.0051635	TRUE	FAM122A
OGN..4969.	-0.17286	-0.197089	9.72e-10	1978	0.00516611	TRUE	OGN
CAMLG..819.	-0.201013	-0.197073	9.75e-10	1979	0.00516872	TRUE	CAMLG
NIN..51199.	-0.197899	-0.197069	9.76e-10	1980	0.00517133	TRUE	NIN
SGTB..54557.	-0.150601	-0.197059	9.78e-10	1981	0.00517395	TRUE	SGTB
RSBN1..54665.	-0.202447	-0.197039	9.82e-10	1982	0.00517656	TRUE	RSBN1
NSFL1C..55968.	0.18463	0.197017	9.86e-10	1983	0.00517917	TRUE	NSFL1C
RPRD1B..58490.	0.183561	0.197008	9.88e-10	1984	0.00518178	TRUE	RPRD1B
PDE9A..5152.	0.133114	0.196977	9.94e-10	1985	0.00518439	TRUE	PDE9A
S100P..6286.	0.208158	0.196902	1.01e-09	1986	0.005187	TRUE	S100P
PCSK6..5046.	0.173579	0.196834	1.02e-09	1987	0.00518962	TRUE	PCSK6
SLC9A3R1..9368.	0.160057	0.19675	1.04e-09	1988	0.00519223	TRUE	SLC9A3R1
RPLP0..6175.	-0.217373	-0.196733	1.04e-09	1989	0.00519484	TRUE	RPLP0
KCNA3..3738.	-0.211041	-0.196731	1.04e-09	1990	0.00519745	TRUE	KCNA3
PPT1..5538.	0.170177	0.196725	1.04e-09	1991	0.00520006	TRUE	PPT1
BIN2..51411.	-0.222638	-0.196596	1.07e-09	1992	0.00520267	TRUE	BIN2
ZNF668..79759.	-0.207039	-0.196467	1.1e-09	1993	0.00520529	TRUE	ZNF668
CDC14B..8555.	0.208786	0.196426	1.11e-09	1994	0.0052079	TRUE	CDC14B
KLF3..51274.	0.199035	0.196419	1.11e-09	1995	0.00521051	TRUE	KLF3
BTBD1..53339.	-0.199864	-0.196301	1.14e-09	1996	0.00521312	TRUE	BTBD1
UBA3..9039.	-0.179407	-0.196298	1.14e-09	1997	0.00521573	TRUE	UBA3
KRT23..25984.	0.154846	0.196275	1.14e-09	1998	0.00521835	TRUE	KRT23
JAK2..3717.	-0.194461	-0.196242	1.15e-09	1999	0.00522096	TRUE	JAK2
[truncated: 17,145 more rows]
