# Supplementary material for: Extensive protein dosage compensation in aneuploid human cancers
Source: HighWire-hosted journal article supplement (doi:10.1101/gr.276378.121), 2022-06-14
Supplement: Supplemental_Table_S10.xlsx [file Supplemental_Table_S10.xlsx]

## Sheet: Legend Table S10
Supplemental Table 10. Terms enriched in RNA or proteins that positively or negatively scale with Aneuploidy Score.
1) Info- Information about collumn names and meaning for Supplemental Table 10
2) Protein.Positive.Corr.Aneuploid- Terms enriched in proteins with high positive correlation with cellular aneuploidy score
3) Protein.Negetive.Corr.Aneuploid- Terms enriched in proteins with high negative correlation with cellular aneuploidy score
4) RNA.Positive.Corr.Aneuploid- Terms enriched in RNA with high positive correlation with cellular aneuploidy score
5) RNA.Negetive.Corr.Aneuploid- Terms enriched in RNA with high negative correlation with cellular aneuploidy score

## Sheet: Info
Supplementary Table 10
Terms enriched in RNA or proteins that positively or negatively scale with Aneuploidy Score.
	Genes were entered as an ordered list: highest to lowest correlation score, or lowest to highest correlation score.
	g:profiler performs an incremental enrichment analysis, starting at the top of the list.
Each sheet contains Gene Set Ontology Terms for a specific set of genes.
Sheet name	Protein group
Protein.Positive.Corr.Aneuploid	Ordered list of terms enriched in proteins with high correlation to cellular aneuploidy score
Protein.Negetive.Corr.Aneuploid	Ordered list of terms enriched in proteins with high negative correlation to cellular aneuploidy score
RNA.Positive.Corr.Aneuploid	Ordered list of terms enriched in RNA with high correlation to cellular aneuploidy score
RNA.Negetive.Corr.Aneuploid	Ordered list of terms enriched in RNA with high negative correlation to cellular aneuploidy score
Collumn	Definition
source	The abbreviation of the datasource for the term (see below).
term_name	Name of term
term_id	Term ID
adjusted_p_value	Hypergeometric p-value after correction for multiple testing.
negative_log2_adjusted_p_value	Negative log2 of the adjusted p-value
negative_log10_of_adjusted_p_value	Negative log2 of the adjusted p-value
term_size	The number of genes that are annotated to the term.
query_size	The number of genes in the query at the optimal cutoff point for the term.
intersection_size	The number of genes in the query that are annotated to the corresponding term.
effective_domain_size	The total number of genes "in the universe " which is used as one of the four parameters for the hypergeometric probability function of statistical significance.
intersections	List of genes intersecting
source ID	Source name
GO:MF	molecular function
GO:CC	cellular component
GO:BP	biological process
KEGG	Kyoto Encyclopedia of Genes and Genomes
REAC	Reactome
WP	WikiPathways
TF	Transfac
MIRNA	miRTarBase
HPA	Human Protein Atlas
CORUM	CORUM protein complexes
HP	Human Phenotype Ontology

## Sheet: Protein.Positive.Corr.Aneuploid
source	term_name	term_id	adjusted_p_value	negative_log2_adjusted_p_value	negative_log10_of_adjusted_p_value	term_size	query_size	intersection_size	effective_domain_size	intersections
CORUM	MRN complex (MRE11-RAD50-NBN complex)	CORUM:173	1.42621e-05	16.0975	4.84582	3	48	3	11553	RAD50,NBN,MRE11A
CORUM	MRN complex (MRE11-RAD50-NBN complex)	CORUM:972	1.42621e-05	16.0975	4.84582	3	48	3	11553	RAD50,NBN,MRE11A
CORUM	MRN complex (MRE11-RAD50-NBN complex)	CORUM:618	1.42621e-05	16.0975	4.84582	3	48	3	11553	RAD50,NBN,MRE11A
CORUM	MRN complex (MRE11-RAD50-NBN complex)	CORUM:73	1.42621e-05	16.0975	4.84582	3	48	3	11553	RAD50,NBN,MRE11A
CORUM	MRN complex (MRE11-RAD50-NBN complex)	CORUM:331	1.42621e-05	16.0975	4.84582	3	48	3	11553	RAD50,NBN,MRE11A
CORUM	RAD50-MRE11-NBN-p200-p350 complex	CORUM:2767	1.42621e-05	16.0975	4.84582	3	48	3	11553	RAD50,NBN,MRE11A
CORUM	MRN complex (MRE11-RAD50-NBN complex)	CORUM:1081	1.42621e-05	16.0975	4.84582	3	48	3	11553	RAD50,NBN,MRE11A
CORUM	MRN complex (MRE11-RAD50-NBN complex)	CORUM:71	1.42621e-05	16.0975	4.84582	3	48	3	11553	RAD50,NBN,MRE11A
CORUM	BRCA1-RAD50-MRE11-NBS1 complex	CORUM:964	5.68817e-05	14.1017	4.24503	4	48	3	11553	RAD50,NBN,MRE11A
CORUM	MRN-TRRAP complex (MRE11A-RAD50-NBN-TRRAP complex)	CORUM:627	5.68817e-05	14.1017	4.24503	4	48	3	11553	RAD50,NBN,MRE11A
CORUM	BRCA1-RAD50-MRE11-NBS1 complex	CORUM:202	5.68817e-05	14.1017	4.24503	4	48	3	11553	RAD50,NBN,MRE11A
CORUM	MRE11A-RAD50-NBN-TRF2 complex	CORUM:619	5.68817e-05	14.1017	4.24503	4	48	3	11553	RAD50,NBN,MRE11A
CORUM	MDC1-MRE11-RAD50-NBS1 complex	CORUM:2218	5.68817e-05	14.1017	4.24503	4	48	3	11553	RAD50,NBN,MRE11A
CORUM	PTIP-DNA damage response complex	CORUM:5197	0.000228962	12.0926	3.64024	6	192	4	11553	RAD50,NBN,MRE11A,PAXIP1
CORUM	GAA1-GPI8-PIGT-PIG-PIGS complex	CORUM:994	0.000241408	12.0162	3.61725	5	255	4	11553	PIGU,PIGK,GPAA1,PIGT
CORUM	MDC1-MRN-ATM-FANCD2 complex	CORUM:2217	0.000282749	11.7882	3.5486	6	48	3	11553	RAD50,NBN,MRE11A
WP	DDX1 as a regulatory component of the Drosha microprocessor	WP:WP2942	0.000342454	11.5118	3.4654	7	48	3	11553	RAD50,NBN,MRE11A
CORUM	DNA double-strand break end-joining complex	CORUM:1189	0.000493366	10.9851	3.30683	7	48	3	11553	RAD50,NBN,MRE11A
GO:CC	integral component of endoplasmic reticulum membrane	GO:0030176	0.000579065	10.754	3.23727	115	255	18	11553	DERL1,TMCO1,HM13,BCAP31,FITM2,PIGU,DPAGT1,EMC4,EMC3,EMC7,RRBP1,MARCHF6,ZMPSTE24,PIGK,MMGT1,ERGIC3,GPAA1,PIGT
REAC	Sensing of DNA Double Strand Breaks	REAC:R-HSA-5693548	0.00058534	10.7384	3.23259	6	48	3	11553	RAD50,NBN,MRE11A
CORUM	BRCA1-BARD1-BACH1-DNA damage complex II	CORUM:2815	0.000787079	10.3112	3.10398	8	48	3	11553	RAD50,NBN,MRE11A
GO:CC	intrinsic component of endoplasmic reticulum membrane	GO:0031227	0.00126541	9.62618	2.89777	119	255	18	11553	DERL1,TMCO1,HM13,BCAP31,FITM2,PIGU,DPAGT1,EMC4,EMC3,EMC7,RRBP1,MARCHF6,ZMPSTE24,PIGK,MMGT1,ERGIC3,GPAA1,PIGT
CORUM	BASC complex (BRCA1-associated genome surveillance complex)	CORUM:433	0.00149703	9.38368	2.82477	12	130	4	11553	RAD50,NBN,MRE11A,MSH6
KEGG	Legionellosis	KEGG:05134	0.00229973	8.76432	2.63832	44	2	2	11553	HSPA6,HSPA1A
KEGG	Longevity regulating pathway - multiple species	KEGG:04213	0.00263691	8.56693	2.5789	52	2	2	11553	HSPA6,HSPA1A
WP	Homologous recombination	WP:WP186	0.00274967	8.50653	2.56072	13	48	3	11553	RAD50,NBN,MRE11A
REAC	Attachment of GPI anchor to uPAR	REAC:R-HSA-162791	0.00337783	8.20969	2.47136	7	255	4	11553	PIGU,PIGK,GPAA1,PIGT
REAC	HDR through MMEJ (alt-NHEJ)	REAC:R-HSA-5685939	0.00347119	8.17035	2.45952	9	48	3	11553	RAD50,NBN,MRE11A
KEGG	Antigen processing and presentation	KEGG:04612	0.00347986	8.16675	2.45844	33	2	2	11553	HSPA6,HSPA1A
CORUM	R/M complex (RAD50-MRE11 complex)	CORUM:264	0.00358134	8.12529	2.44595	2	48	2	11553	RAD50,MRE11A
CORUM	R/M complex (RAD50-MRE11 complex)	CORUM:263	0.00358134	8.12529	2.44595	2	48	2	11553	RAD50,MRE11A
CORUM	R/M complex (RAD50-MRE11 complex)	CORUM:72	0.00358134	8.12529	2.44595	2	48	2	11553	RAD50,MRE11A
HP	Proximal upper limb muscle hypertrophy	HP:0040266	0.00494529	7.65973	2.30581	2	22	2	11553	PLEC,LMNA
HP	Upper limb muscle hypertrophy	HP:0040265	0.00494529	7.65973	2.30581	2	22	2	11553	PLEC,LMNA
KEGG	Proteoglycans in cancer	KEGG:05205	0.00521338	7.58356	2.28288	165	288	16	11553	EGFR,ITGB5,PIK3R3,SDC1,THBS1,IGF1R,CAV1,CTSL,SDC4,ERBB4,TGFB2,FLNA,CAV2,TP53,ITGA2,NRAS
WP	Parkin-Ubiquitin Proteasomal System pathway	WP:WP2359	0.0054764	7.51256	2.2615	63	2	2	11553	HSPA6,HSPA1A
HP	Temporomandibular joint ankylosis	HP:0012478	0.00730262	7.09737	2.13652	3	200	3	11553	LMNA,IDS,ZMPSTE24
WP	Mammary gland development pathway - Pregnancy and lactation (Stage 3 of 4)	WP:WP2817	0.00770276	7.02041	2.11335	23	150	5	11553	NR3C1,EGFR,CAV1,PTPN1,ERBB4
KEGG	Toxoplasmosis	KEGG:05145	0.00863841	6.85502	2.06357	78	2	2	11553	HSPA6,HSPA1A
HP	Ovarian neoplasm	HP:0100615	0.00978581	6.67509	2.0094	57	48	5	11553	RAD50,NBN,LMNA,PMS2,MRE11A
KEGG	Endocytosis	KEGG:04144	0.0109947	6.50705	1.95882	208	151	12	11553	HSPA6,HSPA1A,HSPA2,EGFR,IGF1R,CAV1,EHD3,VPS45,PML,PARD3,EHD1,RAB31
KEGG	Estrogen signaling pathway	KEGG:04915	0.0134238	6.21907	1.87213	79	2	2	11553	HSPA6,HSPA1A
GO:BP	telomeric 3' overhang formation	GO:0031860	0.0134241	6.21903	1.87212	4	48	3	11553	RAD50,NBN,MRE11A
KEGG	Measles	KEGG:05162	0.01382	6.1771	1.85949	108	2	2	11553	HSPA6,HSPA1A
REAC	Regulation of HSF1-mediated heat shock response	REAC:R-HSA-3371453	0.0145322	6.1046	1.83767	64	2	2	11553	HSPA6,HSPA1A
KEGG	Spliceosome	KEGG:03040	0.0161025	5.95658	1.79311	124	2	2	11553	HSPA6,HSPA1A
WP	ATM Signaling Network in Development and Disease	WP:WP3878	0.0200549	5.6399	1.69778	41	68	4	11553	RAD50,NBN,MRE11A,G6PD
KEGG	Protein processing in endoplasmic reticulum	KEGG:04141	0.020699	5.59429	1.68405	149	2	2	11553	HSPA6,HSPA1A
REAC	Cellular response to heat stress	REAC:R-HSA-3371556	0.0245884	5.34588	1.60927	83	2	2	11553	HSPA6,HSPA1A
GO:CC	intrinsic component of organelle membrane	GO:0031300	0.033777	4.88782	1.47138	307	279	28	11553	DERL1,TMCO1,HM13,BCAP31,PEX13,FITM2,PIGU,LEMD2,DPAGT1,EMC4,STX16,EMC3,EMC7,MFN1,ECE1,RRBP1,MARCHF6,BET1,ZMPSTE24,PIGK,MMGT1,SUN1,ERGIC3,RAB27B,GPAA1,PIGT,MUL1,BAK1
HP	Primary peritoneal carcinoma	HP:0030406	0.0338967	4.88271	1.46984	14	48	3	11553	RAD50,NBN,MRE11A
HPA	testis; pachytene spermatocytes[High]	HPA:0570763	0.039345	4.66767	1.40511	75	2	2	11553	HSPA6,HSPA1A
WP	DNA IR-damage and cellular response via ATR	WP:WP4016	0.0483956	4.36898	1.31519	75	48	4	11553	RAD50,NBN,RECQL5,MRE11A

## Sheet: Protein.Negetive.Corr.Aneuploid
source	term_name	term_id	adjusted_p_value	negative_log2_adjusted_p_value	negative_log10_of_adjusted_p_value	term_size	query_size	intersection_size	effective_domain_size	intersections
GO:CC	HAUS complex	GO:0070652	2.23639e-05	15.4485	4.65045	8	156	6	11553	HAUS6,HAUS1,HAUS4,HAUS8,HAUS7,HAUS3
REAC	Nonsense-Mediated Decay (NMD)	REAC:R-HSA-927802	0.000190376	12.3589	3.72039	102	48	7	11553	RPL22L1,PPP2R2A,RPL38,RPS19,DCP1A,RPL23,RPL12
REAC	Nonsense Mediated Decay (NMD) enhanced by the Exon Junction Complex (EJC)	REAC:R-HSA-975957	0.000190376	12.3589	3.72039	102	48	7	11553	RPL22L1,PPP2R2A,RPL38,RPS19,DCP1A,RPL23,RPL12
REAC	Selenoamino acid metabolism	REAC:R-HSA-2408522	0.000209395	12.2215	3.67903	94	228	13	11553	RPL22L1,RPL38,CTH,RPS19,RPL23,RPL12,SCLY,RPL11,RPS27A,RPS5,RPS21,PAPSS1,RPL37
GO:CC	cytosol	GO:0005829	0.000754886	10.3715	3.12212	4152	217	139	11553	LDHB,RFK,AGTPBP1,RAP1GDS1,DCK,CHMP7,ECHDC1,PPP2R2A,RCHY1,PPP2R2B,PDXP,ZBED3,CARM1,PPAT,SMAD4,SHPK,PASK,RNF126,RPL38,VPS37A,CTH,EIF4EBP1,VPS4B,GIT1,PAICS,USP47,GTF2E2,ETNK1,RPS19,PDE12,DCP1A,HAUS6,UNC119B,RPL23,RPL12,NEK9,UBA1,SGTA,MAD2L1,SRR,TBCA,SLAIN2,YTHDF2,UBE2R2,HAUS1,THOP1,DESI1,UBE2F,ATP6V1B2,YBX1,ENOPH1,LRCH3,DNAJC8,HAUS4,SCLY,EIF4E,SERBP1,UBE2N,PPID,RPL11,BTF3,MTHFD1L,DHFR,TXNL1,TIGAR,DP…
REAC	Eukaryotic Translation Initiation	REAC:R-HSA-72613	0.000934903	10.0629	3.02923	107	83	8	11553	RPL22L1,RPL38,EIF4EBP1,RPS19,RPL23,RPL12,EIF4E,RPL11
REAC	Cap-dependent Translation Initiation	REAC:R-HSA-72737	0.000934903	10.0629	3.02923	107	83	8	11553	RPL22L1,RPL38,EIF4EBP1,RPS19,RPL23,RPL12,EIF4E,RPL11
REAC	Eukaryotic Translation Termination	REAC:R-HSA-72764	0.000964284	10.0183	3.01579	84	228	11	11553	RPL22L1,RPL38,RPS19,RPL23,RPL12,RPL11,APEH,RPS27A,RPS5,RPS21,RPL37
WP	Cytoplasmic Ribosomal Proteins	WP:WP477	0.00122808	9.66938	2.91077	81	228	10	11553	RPL38,RPS19,RPL23,RPL12,RPL11,RPS27A,RPS5,RPS6KA1,RPS21,RPL37
KEGG	Ubiquitin mediated proteolysis	KEGG:04120	0.0024208	8.6903	2.61604	118	196	11	11553	RCHY1,UBA1,UBE2R2,UBE2F,UBE2N,UBE2K,UBE2G1,UBE2NL,RPS27A,UBE3A,PIAS2
REAC	Viral mRNA Translation	REAC:R-HSA-192823	0.004486	7.80036	2.34814	80	228	10	11553	RPL22L1,RPL38,RPS19,RPL23,RPL12,RPL11,RPS27A,RPS5,RPS21,RPL37
REAC	Peptide chain elongation	REAC:R-HSA-156902	0.004486	7.80036	2.34814	80	228	10	11553	RPL22L1,RPL38,RPS19,RPL23,RPL12,RPL11,RPS27A,RPS5,RPS21,RPL37
REAC	L13a-mediated translational silencing of Ceruloplasmin expression	REAC:R-HSA-156827	0.00536917	7.54109	2.27009	99	228	11	11553	RPL22L1,RPL38,RPS19,RPL23,RPL12,EIF4E,RPL11,RPS27A,RPS5,RPS21,RPL37
REAC	GTP hydrolysis and joining of the 60S ribosomal subunit	REAC:R-HSA-72706	0.00584631	7.41826	2.23312	101	228	11	11553	RPL22L1,RPL38,RPS19,RPL23,RPL12,EIF4E,RPL11,RPS27A,RPS5,RPS21,RPL37
REAC	Eukaryotic Translation Elongation	REAC:R-HSA-156842	0.0066186	7.23926	2.17923	84	228	10	11553	RPL22L1,RPL38,RPS19,RPL23,RPL12,RPL11,RPS27A,RPS5,RPS21,RPL37
REAC	Selenocysteine synthesis	REAC:R-HSA-2408557	0.0066186	7.23926	2.17923	82	228	10	11553	RPL22L1,RPL38,RPS19,RPL23,RPL12,RPL11,RPS27A,RPS5,RPS21,RPL37
KEGG	Pyruvate metabolism	KEGG:00620	0.00672843	7.21551	2.17209	35	4	2	11553	ME2,LDHB
REAC	Nonsense Mediated Decay (NMD) independent of the Exon Junction Complex (EJC)	REAC:R-HSA-975956	0.00797829	6.9697	2.09809	85	228	10	11553	RPL22L1,RPL38,RPS19,RPL23,RPL12,RPL11,RPS27A,RPS5,RPS21,RPL37
WP	Purine metabolism and related disorders	WP:WP4224	0.00814605	6.93968	2.08905	22	114	4	11553	PPAT,PAICS,RRM2B,PFAS
REAC	Antigen processing: Ubiquitination & Proteasome degradation	REAC:R-HSA-983168	0.0105684	6.5641	1.97599	247	180	16	11553	RNF138,RCHY1,RNF126,UBA1,UBE2R2,THOP1,UBE2F,UBE2N,FBXL4,UBE2K,UBE2V2,UBE2G1,MEX3C,RPS27A,UBE3A,PSMA1
REAC	rRNA processing in the nucleus and cytosol	REAC:R-HSA-8868773	0.011979	6.38335	1.92158	179	228	14	11553	RPL22L1,RPL38,RPS19,RPL23,RPL12,ERI1,RPL11,DIMT1,RIOK2,RPS27A,RPS5,NOB1,RPS21,RPL37
REAC	Formation of a pool of free 40S subunits	REAC:R-HSA-72689	0.01359	6.20131	1.86678	90	228	10	11553	RPL22L1,RPL38,RPS19,RPL23,RPL12,RPL11,RPS27A,RPS5,RPS21,RPL37
REAC	Response of EIF2AK4 (GCN2) to amino acid deficiency	REAC:R-HSA-9633012	0.01359	6.20131	1.86678	90	228	10	11553	RPL22L1,RPL38,RPS19,RPL23,RPL12,RPL11,RPS27A,RPS5,RPS21,RPL37
REAC	Metabolism of RNA	REAC:R-HSA-8953854	0.0147451	6.08362	1.83135	605	204	27	11553	RPL22L1,PPP2R2A,RPL38,RPS19,DCP1A,RPL23,RPL12,ADAT2,YBX1,ERI1,DNAJC8,EIF4E,RPL11,QTRT1,TGS1,DIMT1,PCBP2,SNUPN,TRMT13,RIOK2,RPS27A,RPS5,PSMA1,NOB1,TYW3,DCP1B,RPS21
REAC	Budding and maturation of HIV virion	REAC:R-HSA-162588	0.0163487	5.93468	1.78652	23	162	5	11553	CHMP7,VPS37A,VPS4B,VPS4A,RPS27A
HPA	spleen; cells in white pulp[‚â•Low]	HPA:0530721	0.0179528	5.79965	1.74587	3617	218	107	11553	ME2,LDHB,AGTPBP1,RAP1GDS1,DCK,PPP2R2A,PPP2R2B,PCNP,PDXP,CARM1,PPAT,EIF4EBP1,MLH1,GIT1,CTDP1,GTF2E2,SLC2A13,PDE12,RPL23,NEK9,UBA1,TBCA,ADAT2,CBWD1,HDHD2,HAUS1,UBE2F,ATP6V1B2,YBX1,MARCKSL1,DNAJC8,HAUS4,EIF4E,SERBP1,UBE2N,CCDC25,RPL11,BTF3,MTHFD1L,TXNL1,TIGAR,DPYSL2,TIFA,TGS1,EIF5A,FBXL4,TCEA1,DIMT1,EIF4EBP2,GLOD4,ANKRD17,UBE2K,VPS4A,RRM2B,PFAS,UBE2G1,SH3BGRL,GTF2B,EIF4ENIF1,TRAM2,PAK2,MEX3D,ZNF282,…
REAC	rRNA processing	REAC:R-HSA-72312	0.0209188	5.57906	1.67946	185	228	14	11553	RPL22L1,RPL38,RPS19,RPL23,RPL12,ERI1,RPL11,DIMT1,RIOK2,RPS27A,RPS5,NOB1,RPS21,RPL37
WP	Metabolic reprogramming in colon cancer	WP:WP4290	0.021193	5.56027	1.67381	42	141	5	11553	PPAT,PAICS,TIGAR,RPIA,PSAT1
REAC	Synthesis of active ubiquitin: roles of E1 and E2 enzymes	REAC:R-HSA-8866652	0.0231748	5.4313	1.63498	23	162	5	11553	UBA1,UBE2R2,UBE2K,UBE2G1,RPS27A
REAC	Late Phase of HIV Life Cycle	REAC:R-HSA-162599	0.0233095	5.42294	1.63247	120	36	5	11553	CHMP7,VPS37A,VPS4B,CTDP1,GTF2E2
GO:BP	cellular macromolecule catabolic process	GO:0044265	0.0246165	5.34423	1.60877	998	70	23	11553	AGTPBP1,PPP2R2A,RCHY1,PCNP,RNF126,RPL38,VPS37A,VPS4B,MLH1,USP47,RPS19,PDE12,DCP1A,RPL23,RPL12,UBA1,SGTA,MAD2L1,YTHDF2,UBE2R2,DESI1,YBX1,ERI1
GO:BP	cellular macromolecule catabolic process	GO:0044265	0.0246165	5.34423	1.60877	998	70	23	11553	AGTPBP1,PPP2R2A,RCHY1,PCNP,RNF126,RPL38,VPS37A,VPS4B,MLH1,USP47,RPS19,PDE12,DCP1A,RPL23,RPL12,UBA1,SGTA,MAD2L1,YTHDF2,UBE2R2,DESI1,YBX1,ERI1
REAC	Endosomal Sorting Complex Required For Transport (ESCRT)	REAC:R-HSA-917729	0.0258363	5.27446	1.58777	26	29	3	11553	CHMP7,VPS37A,VPS4B
REAC	Major pathway of rRNA processing in the nucleolus and cytosol	REAC:R-HSA-6791226	0.0287722	5.11918	1.54103	169	228	13	11553	RPL22L1,RPL38,RPS19,RPL23,RPL12,ERI1,RPL11,RIOK2,RPS27A,RPS5,NOB1,RPS21,RPL37
REAC	Protein ubiquitination	REAC:R-HSA-8852135	0.0297323	5.07183	1.52677	52	162	7	11553	UBA1,UBE2R2,UBE2N,UBE2K,UBE2V2,UBE2G1,RPS27A
REAC	SRP-dependent cotranslational protein targeting to membrane	REAC:R-HSA-1799339	0.0327954	4.93036	1.48419	100	228	10	11553	RPL22L1,RPL38,RPS19,RPL23,RPL12,RPL11,RPS27A,RPS5,RPS21,RPL37
REAC	HIV Life Cycle	REAC:R-HSA-162587	0.0362133	4.78734	1.44113	132	36	5	11553	CHMP7,VPS37A,VPS4B,CTDP1,GTF2E2
KEGG	Ribosome	KEGG:03010	0.0431423	4.53475	1.3651	119	48	5	11553	RPL22L1,RPL38,RPS19,RPL23,RPL12
KEGG	Propanoate metabolism	KEGG:00640	0.0461218	4.43841	1.33609	32	11	2	11553	LDHB,ECHDC1

## Sheet: RNA.Positive.Corr.Aneuploid
source	term_name	term_id	adjusted_p_value	negative_log2_of_adjusted_p_value	negative_log10_of_adjusted_p_value	term_size	query_size	intersection_size	effective_domain_size	intersections
GO:CC	anchoring junction	GO:0070161	1.06499e-27	89.6012	26.9727	836	645	106	18911	KRT8,KRT18,BAIAP2L1,HSPA1A,HSPA1B,PPL,CLDN4,BAIAP2,PKP3,EPCAM,SDC4,PAK4,GRB7,F11R,PATJ,AIF1L,ITGB4,PCDH1,CGN,ITGB6,STARD10,EFNA5,PERP,CDH1,DSG2,CLDN9,CLDN1,CTTN,ZNF185,ATP1B1,LSR,TJP1,MARVELD3,DSC2,CAPN2,CLDN7,PKP2,KIFC3,MARVELD2,CTNND1,CDH3,GRHL2,DLG5,DSP,NCKAP1,JUP,PARD6B,ITGA3,PANX2,MISP,PLEKHA7,EVPL,CLDN3,OCLN,BCAR1,EGFR,PPFIA1,NECTIN4,EPPK1,PLEC,PARD3,MICALL2,PXN,EPHA2,TNKS1BP1,PTPRK,OBSL1,P…
GO:CC	cell-cell junction	GO:0005911	7.74815e-24	76.7724	23.1108	500	706	80	18911	KRT8,KRT18,BAIAP2L1,PPL,CLDN4,BAIAP2,PKP3,EPCAM,PAK4,F11R,PATJ,PCDH1,CGN,STARD10,EFNA5,PERP,CDH1,DSG2,CLDN9,CLDN1,ATP1B1,LSR,TJP1,MARVELD3,DSC2,CLDN7,PKP2,KIFC3,MARVELD2,CTNND1,CDH3,GRHL2,DLG5,DSP,JUP,PARD6B,PANX2,PLEKHA7,EVPL,CLDN3,OCLN,NECTIN4,EPPK1,PARD3,MICALL2,PXN,EPHA2,TNKS1BP1,PTPRK,OBSL1,PVR,STX3,CXADR,TRIM29,ADAM15,CDC42EP4,CCDC85C,CDC42BPB,CTNNA1,SLC2A1,CAMSAP3,SCRIB,NECTIN2,PRKCZ,APP,C…
GO:BP	epithelium development	GO:0060429	2.53886e-23	75.0602	22.5954	1237	1879	260	18911	CTSV,LAMA5,KRT8,CELSR1,RIPK4,KRT80,KRT18,PPL,DDR1,PKP3,PDGFB,ELF3,EPCAM,SDC4,F11R,WNT7B,KRT15,FOXA1,MET,ESRP2,ESRP1,THRB,KRT7,SFN,YIPF6,PERP,HES1,TACSTD2,DSG2,CLDN1,SDC1,JAG2,OVOL2,TJP1,DSC2,SIX4,GRHL1,KRT4,PLS1,TFAP2A,PKP2,KLF5,MARVELD2,CDH3,KRT19,GRHL2,ID1,DLG5,DSP,SPINT1,JUP,KDF1,BFSP1,IRF6,TRIM16,LAMA3,ERRFI1,EVPL,MCOLN3,CLDN3,EGFR,LRP5,RYK,SCEL,COBL,EPPK1,SEMA3E,PTK6,PRSS8,NSDHL,EPHA2,PSMA7,…
TF	Factor: ZNF37A; motif: CCYYGGCTCCNTSCCMN; match class: 1	TF:M12354_1	1.43241e-22	72.564	21.8439	5436	3066	1166	18911	KIAA1522,CTSV,LAMA5,KRT8,CELSR1,RIPK4,KRT80,RHPN2,DDR1,CLDN4,BAIAP2,ADGRG1,MAL2,PLPP2,FAM83H,IGSF3,P2RY2,BCAM,PKP3,PDGFB,RASEF,CCNJL,ELF3,EPCAM,ARHGEF16,EPB41L1,PAK4,GRB7,PTPRF,PATJ,WNT7B,KRT15,MYH14,LAPTM4B,LLGL2,ETNK2,IQANK1,VAPB,TSPAN13,SOWAHC,C19ORF33,MAP3K9,PMEPA1,KRT7,AGRN,EFNA5,SFN,YIPF6,ST6GALNAC2,CEP170B,TACSTD2,LAMB3,TRIM47,CTTN,BCAP31,PRSS22,RCE1,SDC1,SYT12,FNBP1L,SLC25A13,CARD10,WNT9A…
GO:BP	cell junction organization	GO:0034330	1.61692e-22	72.3892	21.7913	707	535	80	18911	EFNA1,CLDN4,BAIAP2,PKP3,SDC4,F11R,PTPRF,PATJ,WNT7B,ARHGAP39,ITGB4,AGRN,EFNA5,PERP,CDH1,LAMB3,DSG2,CLDN9,CLDN1,CTTN,LSR,TJP1,MARVELD3,SIX4,STAU1,GRHL1,WASL,CLDN7,LAMC2,PKP2,VMP1,KIFC3,MARVELD2,CTNND1,CDH3,GRHL2,DLG5,DSP,JUP,PARD6B,ITGA3,SPTBN2,LAMA3,PLEKHA7,SEZ6L2,CLDN3,OCLN,PPFIA1,RYK,NECTIN4,IGSF9,SEMA3E,PLEC,PARD3,LIMCH1,MICALL2,ADGRF1,EPHA2,PTPRK,OBSL1,PVR,L1CAM,INAVA,SNCG,CXADR,DUSP3,F2RL1,RH…
GO:BP	tissue development	GO:0009888	1.92859e-21	68.8129	20.7148	1995	3655	602	18911	CTSV,LAMA5,KRT8,CELSR1,TUFT1,RIPK4,KRT80,KRT18,EFNA1,PPL,DDR1,FAM83H,PKP3,PDGFB,ELF3,EPCAM,SDC4,F11R,WNT7B,KRT15,MYH14,ITGB4,FOXA1,MET,ITGB6,ESRP2,ESRP1,THRB,KRT7,AGRN,SFN,YIPF6,PERP,HES1,TACSTD2,LAMB3,DSG2,CLDN1,SDC1,WNT9A,JAG2,OVOL2,TJP1,DSC2,SIX4,GRHL1,KRT4,PLS1,TFAP2A,LAMC2,PKP2,KLF5,MARVELD2,G6PD,CDH3,KRT19,GRHL2,ID1,DLG5,LMNA,DSP,GCNT2,SPINT1,SEMA4B,JUP,KDF1,BFSP1,ITGA3,IRF6,TRIM16,ERBB3,LA…
TF	Factor: CPBP; motif: GNNRGGGHGGGGNNGGGRN; match class: 1	TF:M09973_1	6.25484e-21	67.1155	20.2038	6360	4277	1783	18911	KIAA1522,LAMA5,KRT8,CELSR1,SHTN1,KRT18,BAIAP2L1,EFNA1,RHPN2,WWC1,PPL,CLDN4,BAIAP2,TLCD1,PLPP2,PIP4K2C,FAM83H,IGSF3,BCAM,PKP3,PDGFB,CCNJL,EEF1A2,EPCAM,SDC4,ARHGEF16,PAK4,GRB7,PTPRF,PATJ,AIF1L,CYB561,TSPAN6,CDS1,LLGL2,FOXA1,B3GNT5,SCNN1A,MAP7,VWA1,IQANK1,KLC3,VAPB,TSPAN13,MET,SOWAHC,PCDH1,CGN,MAP3K9,ESRP1,KRT7,AGRN,EFNA5,SFN,ST6GALNAC2,CEP170B,HES1,CDH1,TMEM54,LAMB3,DSG2,TRIM47,CTTN,BCAP31,PRSS22,R…
TF	Factor: Sp2; motif: NYSGCCCCGCCCCCY; match class: 1	TF:M03567_1	2.33106e-20	65.2176	19.6324	3506	2841	749	18911	KRT8,CELSR1,TUFT1,KRT18,BAIAP2L1,EFNA1,RHPN2,BAIAP2,TLCD1,PLPP2,PIP4K2C,FAM83H,IGSF3,BCAM,PKP3,EEF1A2,SDC4,ARHGEF16,GRB7,WFDC2,PATJ,MYH14,CYB561,ANKEF1,TFAP2C,CDS1,LLGL2,FOXA1,B3GNT5,ETNK2,IQANK1,KLC3,TSPAN13,MET,SOWAHC,LYPD3,CGN,MAP3K9,KRT7,AGRN,CEP170B,TMEM54,TRIM47,CTTN,BCAP31,PRSS22,RCE1,SDC1,WNT9A,JAG2,ATP1B1,CLMN,PTPN3,CDC42BPG,PRPF6,TGFA,TJP1,CMTM4,SHB,RGL3,SLC2A4RG,GRHL1,PPP1R26,RAP1GAP,R…
TF	Factor: BTEB1; motif: GGGGGCGGGGCNGSGGGNGS; match class: 1	TF:M09723_1	4.60295e-20	64.236	19.337	5895	3413	1360	18911	KIAA1522,CTSV,LAMA5,KRT8,CELSR1,SHTN1,TMEM184A,KRT18,BAIAP2L1,EFNA1,RHPN2,PPL,DDR1,BAIAP2,TLCD1,PLPP2,PIP4K2C,FAM83H,IGSF3,P2RY2,BCAM,PKP3,CCNJL,MYO5B,EEF1A2,SDC4,ARHGEF16,PAK4,GRB7,WFDC2,PTPRF,PATJ,WNT7B,AIF1L,MYH14,CYB561,ANKEF1,CDS1,LLGL2,FOXA1,B3GNT5,VWA1,PON3,ETNK2,IQANK1,KLC3,TSPAN13,MET,SOWAHC,PCDH1,C19ORF33,CGN,MAP3K9,ESRP2,ESRP1,KRT7,AGRN,ST6GALNAC2,CEP170B,TMEM54,LAMB3,DSG2,TRIM47,CTTN,…
TF	Factor: KLF3; motif: NNNNNNGGGCGGGGCNNGN	TF:M09970	1.27576e-19	62.7653	18.8942	7472	3954	1896	18911	TSPAN15,KIAA1522,CTSV,LAMA5,KRT8,CELSR1,TUFT1,SHTN1,RIPK4,TMEM184A,KRT18,BAIAP2L1,EFNA1,RHPN2,WWC1,PPL,CLDN4,BAIAP2,MAL2,TOM1L1,TLCD1,PLPP2,PIP4K2C,FAM83H,IGSF3,P2RY2,BCAM,PKP3,CHMP4C,PDGFB,RASEF,SPR,MYO5B,EEF1A2,EPCAM,SDC4,ARHGEF16,PAK4,GRB7,F11R,WFDC2,PTPRF,PATJ,WNT7B,KRT15,AIF1L,MYH14,CYB561,LAPTM4B,ANKEF1,TFAP2C,CDS1,LLGL2,FOXA1,B3GNT5,SCNN1A,MAP7,VWA1,PON3,ETNK2,IQANK1,KLC3,VAPB,TSPAN13,MET,…
GO:BP	epidermis development	GO:0008544	3.09366e-19	61.4873	18.5095	390	1707	115	18911	CTSV,LAMA5,KRT8,CELSR1,KRT80,KRT18,PPL,PKP3,KRT15,ESRP1,KRT7,SFN,PERP,HES1,LAMB3,DSG2,JAG2,OVOL2,DSC2,GRHL1,KRT4,PLS1,LAMC2,PKP2,CDH3,KRT19,GRHL2,DSP,JUP,KDF1,IRF6,TRIM16,LAMA3,ERRFI1,EVPL,MCOLN3,EGFR,SCEL,PRSS8,ALDH3A2,NSDHL,EPHA2,MYO6,SCRIB,PTHLH,HOXC13,KRT78,SULT2B1,FA2H,NTF4,KLK5,CRABP2,ST14,TCHH,KRT86,KRT17,PLA2G10,KRT6A,FGFR2,TMEM79,FOXC1,TGFB2,FERMT1,KLF4,CST6,OVOL1,FZD6,CYP26B1,PI3,LGR4,K…
TF	Factor: AP-2beta; motif: GCNNNGGSCNGVGGGN	TF:M01858	3.3913e-19	61.3548	18.4696	7142	3498	1636	18911	KIAA1522,LAMA5,KRT8,CELSR1,SHTN1,RIPK4,KRT80,KRT18,EFNA1,HSPA1A,WWC1,DDR1,CLDN4,FAM241B,BAIAP2,ADGRG1,MAL2,TLCD1,PIP4K2C,FAM83H,IGSF3,BCAM,PKP3,PLEKHG3,PDGFB,CCNJL,SPR,EEF1A2,EPCAM,SDC4,ARHGEF16,EPB41L1,GRB7,WFDC2,PTPRF,PATJ,WNT7B,AIF1L,MYH14,CYB561,PIGT,LAPTM4B,TFAP2C,LLGL2,B3GNT5,MAP7,VWA1,ETNK2,IQANK1,KLC3,SOWAHC,PCDH1,C19ORF33,PMEPA1,ESRP2,ESRP1,STARD10,ACOT4,KRT7,AGRN,KIAA0895,ST6GALNAC2,TME…
TF	Factor: E2F-3; motif: GGCGGGN; match class: 1	TF:M02089_1	3.583e-19	61.2755	18.4458	9047	3002	1738	18911	TSPAN15,KIAA1522,CTSV,LAMA5,KRT8,CELSR1,TUFT1,SHTN1,RIPK4,KRT18,BAIAP2L1,EFNA1,RHPN2,HSPA1A,HSPA1B,WWC1,PPL,CLDN4,BAIAP2,ADGRG1,MAL2,TLCD1,PLPP2,PIP4K2C,FAM83H,IGSF3,P2RY2,BCAM,PKP3,CHMP4C,RASEF,CCNJL,SPR,MYO5B,EEF1A2,EPCAM,SDC4,ARHGEF16,GRB7,F11R,WFDC2,PTPRF,PATJ,TNFRSF21,WNT7B,MYH14,CYB561,LAPTM4B,ANKEF1,TFAP2C,SLC39A1,CDS1,LLGL2,FOXA1,B3GNT5,SCNN1A,MAP7,VWA1,PON3,ETNK2,IQANK1,KLC3,VAPB,TSPAN13…
TF	Factor: KLF3; motif: NNNNNNGGGCGGGGCNNGN; match class: 1	TF:M09970_1	4.63624e-19	60.9037	18.3338	3672	2843	772	18911	CTSV,KRT8,CELSR1,RIPK4,KRT18,BAIAP2L1,EFNA1,RHPN2,WWC1,PPL,BAIAP2,TLCD1,PLPP2,PIP4K2C,FAM83H,IGSF3,P2RY2,BCAM,MYO5B,EEF1A2,SDC4,ARHGEF16,GRB7,WFDC2,PATJ,CYB561,TFAP2C,CDS1,LLGL2,B3GNT5,MAP7,VWA1,ETNK2,IQANK1,KLC3,TSPAN13,MET,SOWAHC,LYPD3,CGN,MAP3K9,ESRP1,KRT7,AGRN,CEP170B,TMEM54,LAMB3,TRIM47,CTTN,BCAP31,RCE1,SDC1,CARD10,WNT9A,JAG2,ATP1B1,CLMN,PTPN3,SSH3,CDC42BPG,PRPF6,TJP1,CMTM4,GRAMD2A,SHB,RGL3,…
TF	Factor: Sp1; motif: NGGGGCGGGGN; match class: 1	TF:M07395_1	5.67088e-19	60.6131	18.2463	6150	2872	1198	18911	TSPAN15,KIAA1522,CTSV,LAMA5,KRT8,CELSR1,TUFT1,SHTN1,RIPK4,KRT18,BAIAP2L1,EFNA1,RHPN2,HSPA1B,WWC1,PPL,CLDN4,FAM241B,BAIAP2,MAL2,TLCD1,PLPP2,PIP4K2C,FAM83H,IGSF3,P2RY2,BCAM,PKP3,PDGFB,RASEF,CCNJL,SPR,MYO5B,EEF1A2,SDC4,ARHGEF16,GRB7,WFDC2,PATJ,WNT7B,MYH14,CYB561,ANKEF1,TFAP2C,CDS1,LLGL2,FOXA1,B3GNT5,MAP7,VWA1,ETNK2,IQANK1,KLC3,VAPB,TSPAN13,MET,SOWAHC,PCDH1,C19ORF33,LYPD3,CGN,MAP3K9,ESRP1,KRT7,AGRN,S…
TF	Factor: SP1:SP3; motif: CCSCCCCCYCC	TF:M01219	6.22807e-19	60.4778	18.2056	6587	3466	1506	18911	TSPAN15,KIAA1522,CTSV,LAMA5,KRT8,CELSR1,SHTN1,KRT18,BAIAP2L1,HSPA1A,WWC1,PPL,FAM241B,BAIAP2,MAL2,PLPP2,FAM83H,IGSF3,P2RY2,BCAM,PDGFB,RASEF,SPR,MYO5B,EEF1A2,SDC4,ARHGEF16,PAK4,PTPRF,PATJ,TNFRSF21,WNT7B,MYH14,CYB561,TSPAN6,LAPTM4B,ANKEF1,TFAP2C,SLC39A1,CDS1,LLGL2,FOXA1,KIAA1671,B3GNT5,ETNK2,IQANK1,KLC3,VAPB,TSPAN13,PCDH1,CGN,MAP3K9,ESRP2,ESRP1,KRT7,AGRN,SFN,ST6GALNAC2,CEP170B,TACSTD2,TMEM54,LAMB3,C…
GO:CC	extracellular exosome	GO:0070062	7.71045e-19	60.1698	18.1129	2031	3101	527	18911	LAMA5,KRT8,KRT18,BAIAP2L1,HSPA1A,HSPA1B,PPL,DDR1,BAIAP2,ADGRG1,MAL2,TOM1L1,PIP4K2C,BCAM,SPR,MYO5B,EPCAM,SDC4,F11R,WFDC2,PTPRF,PATJ,WNT7B,KRT15,AIF1L,MYH14,TSPAN6,ITGB4,SCNN1A,VWA1,PON3,KRT7,AGRN,SFN,CPVL,TMEM132A,TACSTD2,CDH1,DSG2,EPN3,SDC1,SLPI,ATP1B1,LSR,GPRC5C,TSPAN1,DSC2,STAU1,CAPN2,PLS1,WASL,MUC1,KIFC3,G6PD,MB,CTNND1,C11ORF52,KRT19,SLC22A5,GPRC5A,DSP,LAD1,NCKAP1,SYT7,SPINT1,JUP,PARD6B,ITGA3,…
TF	Factor: TIEG1; motif: NCCCNSNCCCCGCCCCC; match class: 1	TF:M12351_1	1.54093e-18	59.1709	17.8122	7885	3594	1820	18911	TSPAN15,KIAA1522,LAMA5,KRT8,CELSR1,RIPK4,KRT80,KRT18,BAIAP2L1,EFNA1,RHPN2,SOX13,HSPA1A,WWC1,PPL,DDR1,CLDN4,FAM241B,BAIAP2,TLCD1,PLPP2,PIP4K2C,FAM83H,IGSF3,P2RY2,BCAM,PKP3,PLEKHG3,PDGFB,RASEF,CCNJL,EEF1A2,EPCAM,SDC4,ARHGEF16,PAK4,GRB7,F11R,WFDC2,PTPRF,PATJ,AIF1L,MYH14,CYB561,ANKEF1,TFAP2C,CDS1,LLGL2,FOXA1,B3GNT5,MAP7,PON3,ETNK2,IQANK1,KLC3,VAPB,TSPAN13,MET,SOWAHC,PCDH1,C19ORF33,LYPD3,CGN,MAP3K9,ES…
TF	Factor: AP-2gamma; motif: GCCYNNGGS; match class: 1	TF:M00470_1	2.16762e-18	58.6786	17.664	5416	2000	787	18911	KIAA1522,CTSV,LAMA5,KRT8,CELSR1,SHTN1,RIPK4,KRT18,BAIAP2L1,EFNA1,DDR1,BAIAP2,ADGRG1,MAL2,TLCD1,PLPP2,FAM83H,IGSF3,P2RY2,BCAM,PKP3,PLEKHG3,PDGFB,CCNJL,SPR,MYO5B,EEF1A2,SDC4,ARHGEF16,PTPRF,PATJ,TNFRSF21,WNT7B,KRT15,MYH14,CYB561,PIGT,LAPTM4B,TFAP2C,SLC39A1,LLGL2,FOXA1,ETNK2,IQANK1,SOWAHC,C19ORF33,MAP3K9,ESRP1,ACOT4,EFNA5,KIAA0895,ST6GALNAC2,CEP170B,HES1,TMEM30B,TMEM54,DSG2,TRIM47,CLDN1,CTTN,BCAP31,R…
GO:BP	cell-cell junction organization	GO:0045216	3.8998e-18	57.8313	17.409	214	529	40	18911	CLDN4,PKP3,F11R,PATJ,PERP,CDH1,DSG2,CLDN9,CLDN1,LSR,TJP1,MARVELD3,GRHL1,CLDN7,PKP2,KIFC3,MARVELD2,CTNND1,CDH3,GRHL2,DLG5,DSP,JUP,PARD6B,PLEKHA7,CLDN3,OCLN,NECTIN4,PARD3,MICALL2,EPHA2,PVR,INAVA,CXADR,F2RL1,CTNNA1,CAMSAP3,NECTIN2,CRB3,ECT2
TF	Factor: E2F; motif: GGCGSG; match class: 1	TF:M00803_1	4.51134e-18	57.6211	17.3457	9857	2803	1753	18911	TSPAN15,KIAA1522,CTSV,LAMA5,KRT8,CELSR1,TUFT1,SHTN1,RIPK4,KRT18,EFNA1,RHPN2,WWC1,PPL,FAM241B,BAIAP2,MAL2,TOM1L1,TLCD1,PLPP2,FAM83H,IGSF3,P2RY2,BCAM,PKP3,PLEKHG3,RAB5IF,PDGFB,RASEF,CCNJL,MYO5B,EEF1A2,EPCAM,SDC4,ARHGEF16,NHLRC1,EPB41L1,PAK4,F11R,PTPRF,PATJ,TNFRSF21,WNT7B,AIF1L,MYH14,CYB561,LAPTM4B,ANKEF1,TFAP2C,SLC39A1,CDS1,LLGL2,FOXA1,B3GNT5,MAP7,VWA1,ETNK2,IQANK1,VAPB,TSPAN13,MET,SOWAHC,PCDH1,LYP…
TF	Factor: Kaiso; motif: GCMGGGRGCRGS; match class: 1	TF:M03876_1	4.72975e-18	57.5529	17.3252	8745	3179	1782	18911	TSPAN15,KIAA1522,LAMA5,KRT8,CELSR1,SHTN1,TMEM184A,KRT80,KRT18,RHPN2,HSPA1A,WWC1,PPL,CLDN4,BAIAP2,ADGRG1,MAL2,TOM1L1,TLCD1,PLPP2,FAM83H,IGSF3,P2RY2,BCAM,PKP3,PLEKHG3,PDGFB,RASEF,PRXL2A,CCNJL,SPR,ELF3,MYO5B,EEF1A2,EPCAM,SDC4,ARHGEF16,EPB41L1,PAK4,GRB7,PTPRF,PATJ,WNT7B,KRT15,TSKU,AIF1L,MYH14,CYB561,LAPTM4B,ANKEF1,TFAP2C,SLC39A1,ITGB4,CDS1,LLGL2,FOXA1,KIAA1671,B3GNT5,SCNN1A,MAP7,VWA1,ETNK2,IQANK1,KLC…
TF	Factor: BTEB1; motif: GGGGGCGGGGCNGSGGGNGS	TF:M09723	5.04406e-18	57.4601	17.2972	9773	3458	2115	18911	TSPAN15,KIAA1522,CTSV,LAMA5,KRT8,CELSR1,SHTN1,RIPK4,TMEM184A,KRT80,KRT18,BAIAP2L1,EFNA1,RHPN2,HSPA1A,HSPA1B,WWC1,PPL,MAP3K13,DDR1,CLDN4,FAM241B,BAIAP2,MAL2,TOM1L1,TLCD1,PLPP2,PIP4K2C,FAM83H,IGSF3,P2RY2,BCAM,PKP3,CHMP4C,RASEF,CCNJL,SPR,MYO5B,EEF1A2,EPCAM,SDC4,ARHGEF16,NHLRC1,PAK4,GRB7,F11R,WFDC2,PTPRF,PATJ,WNT7B,AIF1L,MYH14,CYB561,TSPAN6,LAPTM4B,ANKEF1,TFAP2C,SLC39A1,CDS1,LLGL2,FOXA1,KIAA1671,B3GN…
GO:BP	skin development	GO:0043588	7.38674e-18	56.9098	17.1315	338	1707	104	18911	CTSV,LAMA5,KRT8,CELSR1,KRT80,KRT18,PPL,CLDN4,PKP3,KRT15,ITGB4,MET,ITGB6,KRT7,SFN,PERP,DSG2,CLDN1,OVOL2,LSR,DSC2,GRHL1,KRT4,PKP2,CDH3,KRT19,GRHL2,DSP,JUP,KDF1,ITGA3,IRF6,TRIM16,ERRFI1,EVPL,EGFR,SCEL,PRSS8,NSDHL,EPHA2,DHCR24,HOXC13,KRT78,GJB3,ITGA2,FA2H,RYR1,KLK5,ST14,TCHH,KRT86,KRT17,PLA2G10,KRT6A,FGFR2,TMEM79,FOXC1,TGFB2,FERMT1,OVOL1,FZD6,CYP26B1,PI3,LGR4,KRT83,YAP1,KRT81,KRT16,CTSL,PCSK6,KRT23,A…
TF	Factor: Sp1; motif: NGGGGGCGGGGCCNGGGGGGGG	TF:M10071	9.04855e-18	56.617	17.0434	8178	2886	1536	18911	TSPAN15,KIAA1522,CTSV,LAMA5,KRT8,CELSR1,TUFT1,SHTN1,RIPK4,TMEM184A,KRT18,BAIAP2L1,EFNA1,RHPN2,HSPA1B,WWC1,PPL,DDR1,FAM241B,BAIAP2,MAL2,TOM1L1,TLCD1,PLPP2,PIP4K2C,FAM83H,IGSF3,P2RY2,BCAM,PKP3,CHMP4C,PDGFB,RASEF,CCNJL,SPR,MYO5B,EEF1A2,EPCAM,SDC4,ARHGEF16,NHLRC1,PAK4,GRB7,F11R,WFDC2,PTPRF,PATJ,WNT7B,KRT15,AIF1L,MYH14,CYB561,PIGT,LAPTM4B,ANKEF1,TFAP2C,CDS1,LLGL2,FOXA1,B3GNT5,VWA1,PON3,ETNK2,IQANK1,KL…
TF	Factor: SP2; motif: GNNGGGGGCGGGGSN; match class: 1	TF:M03807_1	9.13169e-18	56.6038	17.0394	4078	2846	836	18911	KIAA1522,CTSV,KRT8,CELSR1,TUFT1,RIPK4,KRT18,BAIAP2L1,EFNA1,RHPN2,WWC1,BAIAP2,TLCD1,PLPP2,PIP4K2C,FAM83H,IGSF3,P2RY2,BCAM,PKP3,CCNJL,MYO5B,EEF1A2,EPCAM,SDC4,ARHGEF16,GRB7,WFDC2,PATJ,MYH14,CYB561,ANKEF1,TFAP2C,CDS1,LLGL2,FOXA1,B3GNT5,ETNK2,IQANK1,KLC3,TSPAN13,MET,SOWAHC,LYPD3,CGN,MAP3K9,KRT7,AGRN,CEP170B,TRIM47,CTTN,BCAP31,PRSS22,RCE1,SDC1,CARD10,WNT9A,JAG2,OVOL2,ATP1B1,CLMN,PTPN3,CDC42BPG,PRPF6,TG…
TF	Factor: BTEB3; motif: CCNNSCCNSCCCCKCCCCC; match class: 1	TF:M09826_1	1.35158e-17	56.0381	16.8692	7234	3954	1836	18911	KIAA1522,LAMA5,KRT8,CELSR1,SHTN1,TMEM184A,KRT18,BAIAP2L1,EFNA1,RHPN2,HSPA1A,MLF1,WWC1,PPL,FAM241B,BAIAP2,TLCD1,PLPP2,PIP4K2C,FAM83H,IGSF3,P2RY2,BCAM,PKP3,CCNJL,MYO5B,EEF1A2,EPCAM,SDC4,ARHGEF16,PAK4,GRB7,WFDC2,PTPRF,PATJ,AIF1L,MYH14,CYB561,LAPTM4B,ANKEF1,SLC39A1,CDS1,LLGL2,FOXA1,B3GNT5,VWA1,ETNK2,IQANK1,KLC3,VAPB,TSPAN13,MET,SOWAHC,PCDH1,CGN,MAP3K9,ESRP2,ESRP1,KRT7,AGRN,ST6GALNAC2,CEP170B,HES1,TAC…
TF	Factor: AP-2; motif: GSCCSCRGGCNRNRNN; match class: 1	TF:M00800_1	3.39722e-17	54.7084	16.4689	4132	3591	1031	18911	KIAA1522,LAMA5,CELSR1,TUFT1,SHTN1,TMEM184A,EFNA1,RHPN2,FAM241B,BAIAP2,MAL2,PKP3,PDGFB,EEF1A2,SDC4,ARHGEF16,F11R,PATJ,TNFRSF21,WNT7B,CYB561,TFAP2C,SLC39A1,ITGB4,LLGL2,FOXA1,ETNK2,MET,SOWAHC,PCDH1,MAP3K9,AGRN,EFNA5,KIAA0895,ST6GALNAC2,CDH1,TMEM30B,TRIM47,CTTN,BCAP31,RCE1,C1ORF56,WNT9A,C6ORF141,JAG2,PTPN3,SSH3,GPRC5C,TGFA,TJP1,CMTM4,GRAMD2A,SHB,SLC2A4RG,PPP1R26,RAP1GAP,CAPN2,REPS2,PLEKHG6,MAB21L4,TF…
TF	Factor: Sp1; motif: NGGGGGCGGGGYN; match class: 1	TF:M00196_1	4.36387e-17	54.3472	16.3601	5745	2872	1121	18911	TSPAN15,KIAA1522,CTSV,KRT8,CELSR1,TUFT1,SHTN1,RIPK4,KRT18,BAIAP2L1,EFNA1,RHPN2,HSPA1B,WWC1,PPL,CLDN4,BAIAP2,TLCD1,PLPP2,PIP4K2C,FAM83H,IGSF3,P2RY2,BCAM,PKP3,PDGFB,CCNJL,SPR,MYO5B,EEF1A2,SDC4,ARHGEF16,GRB7,F11R,WFDC2,PATJ,WNT7B,MYH14,CYB561,ANKEF1,TFAP2C,CDS1,LLGL2,FOXA1,B3GNT5,MAP7,ETNK2,IQANK1,KLC3,VAPB,TSPAN13,MET,SOWAHC,PCDH1,C19ORF33,LYPD3,CGN,MAP3K9,KRT7,AGRN,SFN,CEP170B,TMEM54,LAMB3,DSG2,TR…
TF	Factor: sp4; motif: NNGNARGRGGCGGRGCNNRR	TF:M10072	6.57854e-17	53.755	16.1819	10077	3205	2021	18911	TSPAN15,KIAA1522,CTSV,LAMA5,KRT8,CELSR1,TUFT1,SHTN1,RIPK4,TMEM184A,KRT18,BAIAP2L1,EFNA1,RHPN2,HSPA1A,HSPA1B,DDX27,WWC1,PPL,FAM241B,BAIAP2,MAL2,TOM1L1,TLCD1,PLPP2,PIP4K2C,FAM83H,IGSF3,P2RY2,BCAM,PKP3,CHMP4C,RAB5IF,PDGFB,RASEF,CCNJL,SPR,MYO5B,EEF1A2,EPCAM,SDC4,ARHGEF16,NHLRC1,PAK4,GRB7,F11R,WFDC2,PTPRF,PATJ,TNFRSF21,WNT7B,AIF1L,MYH14,CYB561,PIGT,LAPTM4B,ANKEF1,TFAP2C,SLC39A1,CDS1,LLGL2,FOXA1,B3GNT5…
TF	Factor: Sp1; motif: NGGGGGCGGGGCCNGGGGGGGG; match class: 1	TF:M10071_1	1.07321e-16	53.0489	15.9693	4471	4056	1225	18911	TSPAN15,KIAA1522,CTSV,KRT8,CELSR1,SHTN1,RIPK4,KRT18,BAIAP2L1,EFNA1,RHPN2,WWC1,PPL,BAIAP2,TLCD1,PLPP2,PIP4K2C,FAM83H,IGSF3,P2RY2,BCAM,MYO5B,EEF1A2,EPCAM,SDC4,ARHGEF16,PAK4,GRB7,WFDC2,PTPRF,PATJ,WNT7B,AIF1L,MYH14,CYB561,ANKEF1,TFAP2C,CDS1,LLGL2,B3GNT5,PON3,ETNK2,IQANK1,KLC3,VAPB,TSPAN13,MET,SOWAHC,PCDH1,C19ORF33,LYPD3,CGN,MAP3K9,KRT7,AGRN,SFN,CEP170B,TMEM54,DSG2,TRIM47,CTTN,BCAP31,RCE1,SDC1,FNBP1L,…
TF	Factor: AP-2alpha; motif: NGCCYSNNGSN; match class: 1	TF:M01857_1	1.11454e-16	52.9944	15.9529	4477	3485	1071	18911	KIAA1522,CTSV,LAMA5,KRT8,CELSR1,TUFT1,SHTN1,KRT80,KRT18,BAIAP2,MAL2,TLCD1,PLPP2,FAM83H,IGSF3,P2RY2,BCAM,PKP3,RAB5IF,PDGFB,RASEF,CCNJL,SPR,EEF1A2,EPCAM,SDC4,ARHGEF16,PTPRF,PATJ,TNFRSF21,AIF1L,MYH14,CYB561,TSPAN6,TFAP2C,LLGL2,FOXA1,ETNK2,IQANK1,KLC3,VAPB,TSPAN13,MET,SOWAHC,MAP3K9,ESRP1,AGRN,EFNA5,KIAA0895,ST6GALNAC2,CEP170B,TMEM30B,TMEM54,TRIM47,CLDN9,CTTN,BCAP31,PRSS22,RCE1,SYT12,CARD10,WNT9A,JAG2…
TF	Factor: sp4; motif: NNGNARGRGGCGGRGCNNRR; match class: 1	TF:M10072_1	1.33003e-16	52.7394	15.8761	6028	3467	1380	18911	TSPAN15,KIAA1522,LAMA5,KRT8,CELSR1,TUFT1,SHTN1,KRT18,BAIAP2L1,EFNA1,RHPN2,HSPA1B,WWC1,BAIAP2,TLCD1,PLPP2,PIP4K2C,FAM83H,IGSF3,P2RY2,BCAM,PKP3,RASEF,SPR,EEF1A2,EPCAM,SDC4,ARHGEF16,PAK4,GRB7,WFDC2,PTPRF,PATJ,AIF1L,MYH14,CYB561,ANKEF1,TFAP2C,SLC39A1,CDS1,LLGL2,FOXA1,B3GNT5,MAP7,ETNK2,IQANK1,KLC3,VAPB,TSPAN13,MET,SOWAHC,C19ORF33,LYPD3,CGN,MAP3K9,ESRP1,KRT7,AGRN,SFN,ST6GALNAC2,CEP170B,TMEM54,DSG2,TRIM…
TF	Factor: BTEB3; motif: CCNNSCCNSCCCCKCCCCC	TF:M09826	1.78336e-16	52.3162	15.7488	10996	3413	2310	18911	TSPAN15,KIAA1522,CTSV,LAMA5,KRT8,CELSR1,SHTN1,RIPK4,TMEM184A,KRT80,KRT18,BAIAP2L1,EFNA1,RHPN2,HSPA1A,MLF1,HSPA1B,WWC1,PPL,DDR1,CLDN4,FAM241B,BAIAP2,MAL2,TLCD1,PLPP2,PIP4K2C,FAM83H,IGSF3,P2RY2,BCAM,PKP3,CHMP4C,PLEKHG3,PDGFB,RASEF,CCNJL,MYO5B,EEF1A2,EPCAM,SDC4,ARHGEF16,NHLRC1,PAK4,GRB7,F11R,WFDC2,PTPRF,PATJ,TNFRSF21,WNT7B,KRT15,AIF1L,MYH14,ARHGAP39,CYB561,TSPAN6,PIGT,LAPTM4B,ANKEF1,TFAP2C,SLC39A1,C…
TF	Factor: PATZ; motif: GGGGNGGGGGMKGGRRNGGNRN	TF:M10026	2.00693e-16	52.1459	15.6975	8076	3530	1817	18911	TSPAN15,KIAA1522,CTSV,LAMA5,KRT8,CELSR1,RIPK4,KRT18,BAIAP2L1,EFNA1,RHPN2,HSPA1A,WWC1,PPL,CLDN4,BAIAP2,TLCD1,PLPP2,FAM83H,IGSF3,P2RY2,PDGFB,RASEF,PRXL2A,CCNJL,MYO5B,EEF1A2,EPCAM,SDC4,ARHGEF16,PAK4,WFDC2,PTPRF,PATJ,TNFRSF21,WNT7B,AIF1L,MYH14,ARHGAP39,CYB561,TSPAN6,LAPTM4B,ANKEF1,SLC39A1,CDS1,LLGL2,FOXA1,KIAA1671,B3GNT5,SCNN1A,VWA1,ETNK2,IQANK1,KLC3,VAPB,TSPAN13,MET,SOWAHC,PCDH1,C19ORF33,MAP3K9,ESRP…
TF	Factor: Sp2; motif: GGSNNGGGGGCGGGGCCNGNGS	TF:M09658	2.06355e-16	52.1057	15.6854	5099	3390	1169	18911	TSPAN15,CTSV,LAMA5,KRT8,CELSR1,RIPK4,KRT18,BAIAP2L1,EFNA1,RHPN2,WWC1,PPL,FAM241B,BAIAP2,TLCD1,PLPP2,PIP4K2C,IGSF3,BCAM,PKP3,MYO5B,EEF1A2,SDC4,ARHGEF16,PAK4,GRB7,F11R,PTPRF,PATJ,AIF1L,LAPTM4B,ANKEF1,CDS1,LLGL2,B3GNT5,ETNK2,KLC3,VAPB,MET,SOWAHC,PCDH1,C19ORF33,CGN,MAP3K9,AGRN,SFN,CEP170B,TMEM54,CTTN,BCAP31,PRSS22,RCE1,SDC1,FNBP1L,CARD10,WNT9A,JAG2,ATP1B1,CLMN,PTPN3,CDC42BPG,TJP1,CMTM4,SHB,SLC2A4RG,G…
TF	Factor: AP-2; motif: SNNNCCNCAGGCN	TF:M00915	2.1844e-16	52.0236	15.6607	9239	2998	1759	18911	TSPAN15,KIAA1522,CTSV,LAMA5,CELSR1,SHTN1,RIPK4,TMEM184A,KRT80,BAIAP2L1,RHPN2,DDX27,WWC1,DDR1,CLDN4,FAM241B,BAIAP2,ADGRG1,MAL2,TOM1L1,TLCD1,PLPP2,PIP4K2C,FAM83H,IGSF3,P2RY2,BCAM,PKP3,PLEKHG3,RAB5IF,PDGFB,PRXL2A,CCNJL,ELF3,MYO5B,EEF1A2,EPCAM,SDC4,ARHGEF16,EPB41L1,GRB7,F11R,PTPRF,PATJ,TNFRSF21,WNT7B,KRT15,TSKU,AIF1L,MYH14,ARHGAP39,CYB561,TSPAN6,PIGT,LAPTM4B,TFAP2C,ITGB4,CDS1,LLGL2,FOXA1,B3GNT5,SCNN1…
TF	Factor: Sp1; motif: GGGGCGGGGC; match class: 1	TF:M00931_1	3.05903e-16	51.5378	15.5144	5725	2843	1104	18911	CTSV,KRT8,CELSR1,TUFT1,SHTN1,RIPK4,KRT18,BAIAP2L1,EFNA1,RHPN2,HSPA1B,WWC1,PPL,CLDN4,BAIAP2,TLCD1,PLPP2,PIP4K2C,FAM83H,IGSF3,P2RY2,BCAM,PKP3,CHMP4C,CCNJL,MYO5B,EEF1A2,SDC4,ARHGEF16,GRB7,F11R,WFDC2,PATJ,WNT7B,MYH14,CYB561,ANKEF1,TFAP2C,CDS1,LLGL2,FOXA1,B3GNT5,MAP7,VWA1,ETNK2,IQANK1,KLC3,VAPB,TSPAN13,MET,SOWAHC,LYPD3,CGN,MAP3K9,ESRP1,KRT7,AGRN,CEP170B,HES1,TMEM54,LAMB3,DSG2,TRIM47,CTTN,BCAP31,PRSS22…
GO:BP	biological adhesion	GO:0022610	3.71003e-16	51.2594	15.4306	1403	588	114	18911	LAMA5,CELSR1,KRT18,BAIAP2L1,EFNA1,SOX13,DDR1,CLDN4,BAIAP2,ADGRG1,BCAM,PKP3,PDGFB,EPCAM,SDC4,PAK4,F11R,PTPRF,TNFRSF21,WNT7B,ITGB4,FOXA1,PCDH1,LYPD3,ITGB6,EFNA5,PERP,HES1,TACSTD2,CDH1,LAMB3,DSG2,CLDN9,CLDN1,CTTN,JAG2,ATP1B1,TJP1,MPZL2,DSC2,INHBB,MUC1,CLDN7,LAMC2,PKP2,VMP1,KIFC3,CTNND1,CDH3,GRHL2,ID1,DLG5,DSP,GCNT2,JUP,ITGA3,ERBB3,LAMA3,PLEKHA7,CLDN3,BCAR1,EGFR,PPFIA1,NECTIN4,IGSF9,SEMA3E,PARD3,LIMC…
TF	Factor: Sp1; motif: RGGGMGGRGSNGGGG	TF:M10529	3.97646e-16	51.1594	15.4005	6625	4350	1847	18911	LAMA5,KRT8,RIPK4,KRT18,BAIAP2L1,EFNA1,RHPN2,HSPA1A,HSPA1B,WWC1,PPL,CLDN4,BAIAP2,TLCD1,PLPP2,FAM83H,IGSF3,P2RY2,BCAM,PKP3,PLEKHG3,PDGFB,CCNJL,MYO5B,EEF1A2,EPCAM,ARHGEF16,PAK4,GRB7,PATJ,KRT15,AIF1L,MYH14,TSPAN6,LAPTM4B,ANKEF1,LLGL2,FOXA1,B3GNT5,SCNN1A,MAP7,VWA1,ETNK2,IQANK1,KLC3,TSPAN13,SOWAHC,PCDH1,C19ORF33,MAP3K9,ESRP1,KRT7,AGRN,SFN,ST6GALNAC2,CEP170B,HES1,TACSTD2,TMEM54,DSG2,TRIM47,CLDN9,CTTN,BC…
GO:BP	cell adhesion	GO:0007155	7.63813e-16	50.2176	15.117	1396	588	113	18911	LAMA5,CELSR1,KRT18,BAIAP2L1,EFNA1,SOX13,DDR1,CLDN4,BAIAP2,ADGRG1,BCAM,PKP3,PDGFB,EPCAM,SDC4,PAK4,F11R,PTPRF,TNFRSF21,WNT7B,ITGB4,FOXA1,PCDH1,LYPD3,ITGB6,EFNA5,PERP,HES1,TACSTD2,CDH1,LAMB3,DSG2,CLDN9,CLDN1,CTTN,JAG2,ATP1B1,TJP1,MPZL2,DSC2,MUC1,CLDN7,LAMC2,PKP2,VMP1,KIFC3,CTNND1,CDH3,GRHL2,ID1,DLG5,DSP,GCNT2,JUP,ITGA3,ERBB3,LAMA3,PLEKHA7,CLDN3,BCAR1,EGFR,PPFIA1,NECTIN4,IGSF9,SEMA3E,PARD3,LIMCH1,MIC…
GO:BP	anatomical structure morphogenesis	GO:0009653	1.00994e-15	49.8146	14.9957	2723	2256	490	18911	LAMA5,KRT8,CELSR1,TUFT1,SHTN1,RIPK4,KRT18,EFNA1,SOX13,MAP3K13,DDR1,CLDN4,BAIAP2,ADGRG1,ELF3,SDC4,PAK4,GRB7,F11R,WNT7B,TSKU,MYH14,SLC39A1,ITGB4,FOXA1,MET,ITGB6,ESRP2,THRB,AGRN,EFNA5,PERP,HES1,TACSTD2,LAMB3,CTTN,SDC1,CARD10,WNT9A,JAG2,OVOL2,TGFA,TJP1,MPZL2,SHB,SIX4,RAP1GAP,CAPN2,PLS1,TFAP2A,WASL,LAMC2,PKP2,KLF5,AURKA,KRT19,GRHL2,ID1,YTHDF1,DLG5,DSP,PLK2,NCKAP1,SPINT1,SEMA4B,JUP,KDF1,PARD6B,ITGA3,SP…
REAC	Cell junction organization	REAC:R-HSA-446728	1.16543e-15	49.6081	14.9335	91	527	25	18911	CLDN4,F11R,PATJ,ITGB4,CDH1,LAMB3,CLDN9,CLDN1,CLDN7,LAMC2,CTNND1,CDH3,JUP,PARD6B,LAMA3,CLDN3,NECTIN4,PLEC,PARD3,PXN,PVR,DST,CTNNA1,NECTIN2,CRB3
TF	Factor: AP-2; motif: MKCCCSCNGGCG; match class: 1	TF:M00189_1	1.38103e-15	49.3632	14.8598	5889	2052	848	18911	KIAA1522,CTSV,LAMA5,CELSR1,SHTN1,RIPK4,BAIAP2L1,EFNA1,RHPN2,PPL,BAIAP2,ADGRG1,MAL2,TLCD1,P2RY2,PKP3,PLEKHG3,PDGFB,MYO5B,EEF1A2,SDC4,ARHGEF16,F11R,WFDC2,PTPRF,PATJ,WNT7B,AIF1L,MYH14,ARHGAP39,CYB561,LAPTM4B,TFAP2C,SLC39A1,CDS1,LLGL2,SCNN1A,MAP7,VWA1,ETNK2,KLC3,SOWAHC,PCDH1,C19ORF33,CGN,MAP3K9,ESRP2,ACOT4,KRT7,AGRN,KIAA0895,ST6GALNAC2,CEP170B,HES1,TMEM30B,TMEM54,DSG2,TRIM47,CLDN9,CTTN,BCAP31,RTL8A,S…
TF	Factor: SP2; motif: GNNGGGGGCGGGGSN	TF:M03807	1.39333e-15	49.3504	14.8559	8115	2847	1492	18911	TSPAN15,KIAA1522,CTSV,LAMA5,KRT8,CELSR1,TUFT1,SHTN1,RIPK4,TMEM184A,KRT18,BAIAP2L1,EFNA1,RHPN2,WWC1,PPL,MAP3K13,CLDN4,BAIAP2,MAL2,TOM1L1,TLCD1,PLPP2,PIP4K2C,FAM83H,IGSF3,P2RY2,BCAM,PKP3,CHMP4C,PDGFB,RASEF,CCNJL,SPR,MYO5B,EEF1A2,EPCAM,SDC4,ARHGEF16,PAK4,GRB7,F11R,WFDC2,PTPRF,PATJ,TNFRSF21,WNT7B,MYH14,CYB561,PIGT,LAPTM4B,ANKEF1,TFAP2C,CDS1,LLGL2,FOXA1,B3GNT5,VWA1,ETNK2,IQANK1,KLC3,VAPB,TSPAN13,MET,S…
TF	Factor: WT1; motif: CGCCCCCNCN	TF:M02036	1.68727e-15	49.0742	14.7728	9409	3490	2046	18911	TSPAN15,KIAA1522,CTSV,LAMA5,KRT8,CELSR1,SHTN1,RIPK4,TMEM184A,KRT18,BAIAP2L1,RHPN2,HSPA1A,WWC1,PPL,FAM241B,BAIAP2,ADGRG1,MAL2,TLCD1,PLPP2,PIP4K2C,FAM83H,IGSF3,P2RY2,BCAM,PKP3,PDGFB,RASEF,CCNJL,SPR,MYO5B,EEF1A2,EPCAM,SDC4,ARHGEF16,NHLRC1,PAK4,GRB7,WFDC2,PTPRF,PATJ,WNT7B,AIF1L,MYH14,ARHGAP39,CYB561,TSPAN6,LAPTM4B,ANKEF1,TFAP2C,SLC39A1,CDS1,LLGL2,FOXA1,KIAA1671,B3GNT5,MAP7,VWA1,PON3,ETNK2,IQANK1,KLC3…
GO:BP	epithelial cell differentiation	GO:0030855	2.02604e-15	48.8103	14.6934	701	1418	135	18911	CTSV,KRT8,KRT80,KRT18,PPL,PKP3,PDGFB,ELF3,F11R,WNT7B,KRT15,FOXA1,MET,ESRP1,THRB,KRT7,SFN,YIPF6,PERP,HES1,DSG2,CLDN1,SDC1,JAG2,OVOL2,TJP1,DSC2,GRHL1,KRT4,PLS1,PKP2,KLF5,MARVELD2,CDH3,KRT19,GRHL2,ID1,DLG5,DSP,JUP,KDF1,BFSP1,IRF6,TRIM16,ERRFI1,EVPL,MCOLN3,CLDN3,SCEL,PTK6,PRSS8,EPHA2,SPINT2,RAB25,F2RL1,AGR2,MYO6,CD24,CAMSAP3,CYP1A1,SCRIB,KRT78,SULT2B1,ITGA2,UPK2,FA2H,EHF,OPHN1,RDX,KLK5,WWTR1,ST14,TCH…
GO:MF	cell adhesion molecule binding	GO:0050839	2.25922e-15	48.6531	14.646	530	504	56	18911	LAMA5,SHTN1,KRT18,BAIAP2L1,HSPA1A,PPL,BAIAP2,BCAM,PKP3,EPCAM,ARHGEF16,PAK4,F11R,PTPRF,ITGB4,VAPB,CGN,ITGB6,SFN,CDH1,DSG2,CTTN,FNBP1L,TJP1,DSC2,PKP2,CTNND1,CDH3,GPRC5A,DSP,LAD1,JUP,ITGA3,GIPC1,SPTBN2,LAMA3,EVPL,EGFR,EPS8L1,IGSF9,PLEC,EPHA2,TNKS1BP1,PVR,CXADR,CHMP4B,TRIM29,LAMB1,EMP2,ADAM15,DST,CTNNA1,SCRIB,NECTIN2,ITGB5,PHLDB2
GO:CC	extracellular vesicle	GO:1903561	2.5296e-15	48.49	14.5969	2052	3118	531	18911	LAMA5,KRT8,KRT18,BAIAP2L1,HSPA1A,HSPA1B,PPL,DDR1,BAIAP2,ADGRG1,MAL2,TOM1L1,PIP4K2C,BCAM,SPR,MYO5B,EPCAM,SDC4,F11R,WFDC2,PTPRF,PATJ,WNT7B,KRT15,AIF1L,MYH14,TSPAN6,ITGB4,SCNN1A,VWA1,PON3,KRT7,AGRN,SFN,CPVL,TMEM132A,TACSTD2,CDH1,DSG2,EPN3,SDC1,SLPI,ATP1B1,LSR,GPRC5C,TSPAN1,DSC2,STAU1,CAPN2,PLS1,WASL,MUC1,KIFC3,G6PD,MB,CTNND1,C11ORF52,KRT19,SLC22A5,GPRC5A,DSP,LAD1,NCKAP1,SYT7,SPINT1,JUP,PARD6B,ITGA3,…
TF	Factor: AP-2beta; motif: GCNNNGGSCNGVGGGN; match class: 1	TF:M01858_1	2.63286e-15	48.4323	14.5796	3044	3458	760	18911	KIAA1522,CELSR1,RIPK4,KRT80,CLDN4,FAM241B,BAIAP2,TLCD1,PIP4K2C,BCAM,EEF1A2,EPCAM,SDC4,GRB7,PTPRF,PATJ,WNT7B,AIF1L,MYH14,TFAP2C,LLGL2,ETNK2,IQANK1,SOWAHC,PMEPA1,ACOT4,KRT7,KIAA0895,ST6GALNAC2,LAMB3,CTTN,BCAP31,PRSS22,SDC1,FNBP1L,WNT9A,JAG2,CLMN,SSH3,TJP1,GRAMD2A,SHB,RGL3,DSC2,SIX4,SLC2A4RG,GRHL1,PPP1R26,CAPN2,PLEKHG6,INHBB,CLDN7,LAMC2,PKP2,KLF5,CITED4,SPIRE2,UPP1,DLG5,NANOS1,DSP,LAD1,SYT7,CUEDC1,K…
TF	Factor: Sp1; motif: NNGGGGCGGGGNN; match class: 1	TF:M00932_1	2.80332e-15	48.3418	14.5523	5867	2846	1122	18911	CTSV,LAMA5,KRT8,CELSR1,TUFT1,SHTN1,RIPK4,KRT18,BAIAP2L1,EFNA1,RHPN2,HSPA1B,WWC1,PPL,DDR1,CLDN4,BAIAP2,TLCD1,PLPP2,PIP4K2C,FAM83H,IGSF3,P2RY2,BCAM,PKP3,CHMP4C,CCNJL,SPR,MYO5B,EEF1A2,SDC4,ARHGEF16,GRB7,WFDC2,PATJ,WNT7B,MYH14,CYB561,ANKEF1,TFAP2C,CDS1,LLGL2,FOXA1,B3GNT5,SCNN1A,MAP7,VWA1,ETNK2,IQANK1,KLC3,VAPB,TSPAN13,MET,SOWAHC,LYPD3,CGN,MAP3K9,ESRP1,KRT7,AGRN,SFN,CEP170B,HES1,TMEM54,LAMB3,DSG2,TRIM…
GO:CC	extracellular organelle	GO:0043230	3.08247e-15	48.2048	14.5111	2054	3118	531	18911	LAMA5,KRT8,KRT18,BAIAP2L1,HSPA1A,HSPA1B,PPL,DDR1,BAIAP2,ADGRG1,MAL2,TOM1L1,PIP4K2C,BCAM,SPR,MYO5B,EPCAM,SDC4,F11R,WFDC2,PTPRF,PATJ,WNT7B,KRT15,AIF1L,MYH14,TSPAN6,ITGB4,SCNN1A,VWA1,PON3,KRT7,AGRN,SFN,CPVL,TMEM132A,TACSTD2,CDH1,DSG2,EPN3,SDC1,SLPI,ATP1B1,LSR,GPRC5C,TSPAN1,DSC2,STAU1,CAPN2,PLS1,WASL,MUC1,KIFC3,G6PD,MB,CTNND1,C11ORF52,KRT19,SLC22A5,GPRC5A,DSP,LAD1,NCKAP1,SYT7,SPINT1,JUP,PARD6B,ITGA3,…
GO:CC	apical junction complex	GO:0043296	4.52567e-15	47.6508	14.3443	145	1891	56	18911	CLDN4,EPCAM,F11R,PATJ,CGN,CDH1,CLDN9,CLDN1,TJP1,MARVELD3,CLDN7,KIFC3,MARVELD2,CTNND1,JUP,PARD6B,PLEKHA7,CLDN3,OCLN,EPPK1,PARD3,MICALL2,CXADR,CCDC85C,CTNNA1,CAMSAP3,NECTIN2,PRKCZ,CRB3,ECT2,AMOTL2,CLDN12,TJP3,EPB41L4B,ANK3,MAPK15,CLDN8,AFDN,CLDN23,RAB13,CLDN10,MAGI3,PRKCI,MPP7,MPP5,CGNL1,NPHP1,FZD5,NECTIN1,SHROOM2,SAPCD2,CCND1,NHS,CDH5,TJP2,SHROOM3
TF	Factor: WT1; motif: CGCCCCCNCN; match class: 1	TF:M02036_1	5.30937e-15	47.4204	14.275	5138	3179	1101	18911	TSPAN15,KIAA1522,CTSV,LAMA5,CELSR1,SHTN1,RIPK4,BAIAP2L1,RHPN2,HSPA1A,WWC1,PPL,FAM241B,BAIAP2,MAL2,TLCD1,PLPP2,FAM83H,IGSF3,PDGFB,RASEF,CCNJL,MYO5B,EEF1A2,SDC4,ARHGEF16,NHLRC1,PAK4,WFDC2,PTPRF,PATJ,AIF1L,MYH14,CYB561,ANKEF1,CDS1,LLGL2,FOXA1,B3GNT5,VWA1,ETNK2,IQANK1,KLC3,VAPB,TSPAN13,SOWAHC,PCDH1,MAP3K9,AGRN,KIAA0895,CEP170B,CDH1,TMEM54,CTTN,BCAP31,SDC1,CARD10,WNT9A,JAG2,ATP1B1,CLMN,PTPN3,SSH3,LSR,…
GO:BP	tissue morphogenesis	GO:0048729	8.58693e-15	46.7268	14.0662	673	4509	264	18911	LAMA5,CELSR1,RIPK4,DDR1,SDC4,WNT7B,ITGB4,FOXA1,MET,ESRP2,HES1,TACSTD2,JAG2,OVOL2,SIX4,TFAP2A,PKP2,GRHL2,DLG5,DSP,SPINT1,KDF1,ITGA3,LAMA3,EGFR,LRP5,RYK,COBL,SEMA3E,EPHA2,PSMA7,SPINT2,ALDH1A3,RAC1,PBX1,CAMSAP3,SCRIB,PHLDB2,FOLR1,PSMC4,DAG1,ITGA2,OPHN1,ST14,AJUBA,LHX1,KRT17,PLA2G10,MDK,AREG,SERPINB5,PSMD4,KRT6A,FGFR2,ARTN,PLXNA1,TMEM79,CELSR2,FOXC1,WNT4,TGFB2,STK3,FERMT1,KLF4,FZD6,LGR4,RXRA,GREB1L,N…
GO:BP	morphogenesis of an epithelium	GO:0002009	1.00767e-14	46.496	13.9967	568	4417	226	18911	LAMA5,CELSR1,RIPK4,DDR1,SDC4,WNT7B,FOXA1,MET,ESRP2,HES1,TACSTD2,JAG2,OVOL2,SIX4,TFAP2A,GRHL2,DLG5,SPINT1,KDF1,LAMA3,EGFR,LRP5,RYK,COBL,SEMA3E,EPHA2,PSMA7,SPINT2,ALDH1A3,RAC1,PBX1,CAMSAP3,SCRIB,PHLDB2,FOLR1,PSMC4,DAG1,OPHN1,ST14,AJUBA,LHX1,KRT17,PLA2G10,MDK,AREG,SERPINB5,PSMD4,KRT6A,FGFR2,PLXNA1,TMEM79,CELSR2,WNT4,TGFB2,STK3,FERMT1,KLF4,FZD6,LGR4,RXRA,GREB1L,NTN4,YAP1,SIX1,KRT16,EFNB2,SLC9A3R1,PSM…
GO:BP	cell junction assembly	GO:0034329	1.07329e-14	46.4049	13.9693	431	535	52	18911	CLDN4,PKP3,SDC4,F11R,PATJ,ITGB4,AGRN,EFNA5,CDH1,LAMB3,CLDN9,CLDN1,CTTN,LSR,TJP1,MARVELD3,SIX4,CLDN7,LAMC2,PKP2,VMP1,MARVELD2,CTNND1,GRHL2,DLG5,JUP,PARD6B,SPTBN2,LAMA3,CLDN3,OCLN,RYK,PLEC,PARD3,LIMCH1,MICALL2,ADGRF1,EPHA2,PTPRK,OBSL1,DUSP3,RHOD,RAC1,DST,CTNNA1,CAMSAP3,PCLO,PHLDB2,APP,CRB3,ECT2,S100A10
TF	Factor: PATZ; motif: GGGGNGGGGGMKGGRRNGGNRN; match class: 1	TF:M10026_1	1.0802e-14	46.3957	13.9665	4711	3138	1017	18911	TSPAN15,KIAA1522,LAMA5,CELSR1,BAIAP2L1,EFNA1,RHPN2,HSPA1A,WWC1,BAIAP2,TLCD1,PLPP2,IGSF3,P2RY2,PDGFB,PRXL2A,EEF1A2,EPCAM,SDC4,ARHGEF16,PAK4,WFDC2,PTPRF,TNFRSF21,WNT7B,AIF1L,ARHGAP39,CYB561,LAPTM4B,ANKEF1,CDS1,LLGL2,KIAA1671,B3GNT5,SCNN1A,VWA1,ETNK2,KLC3,SOWAHC,PCDH1,MAP3K9,ESRP2,ESRP1,KRT7,AGRN,EFNA5,ST6GALNAC2,TMEM132A,CEP170B,TACSTD2,TMEM54,LAMB3,DSG2,CTTN,BCAP31,RCE1,CARD10,WNT9A,JAG2,ATP1B1,CL…
TF	Factor: AP-2alpha; motif: NGCCYSNNGSN	TF:M01857	1.13219e-14	46.3279	13.9461	8829	1502	895	18911	KIAA1522,CTSV,LAMA5,KRT8,CELSR1,TUFT1,SHTN1,KRT80,KRT18,BAIAP2L1,RHPN2,HSPA1A,PPL,CLDN4,FAM241B,BAIAP2,MAL2,TOM1L1,TLCD1,PLPP2,FAM83H,IGSF3,P2RY2,BCAM,PKP3,PLEKHG3,RAB5IF,PDGFB,RASEF,CCNJL,SPR,MYO5B,EEF1A2,EPCAM,SDC4,ARHGEF16,NHLRC1,EPB41L1,GRB7,PTPRF,PATJ,TNFRSF21,WNT7B,KRT15,AIF1L,MYH14,ARHGAP39,CYB561,TSPAN6,LAPTM4B,ANKEF1,TFAP2C,SLC39A1,ITGB4,LLGL2,FOXA1,KIAA1671,B3GNT5,SCNN1A,MAP7,ETNK2,IQAN…
TF	Factor: ETF; motif: GVGGMGG; match class: 1	TF:M00695_1	1.82833e-14	45.6365	13.7379	6829	3460	1517	18911	KIAA1522,CTSV,LAMA5,CELSR1,BAIAP2L1,RHPN2,HSPA1B,WWC1,PPL,BAIAP2,MAL2,PLPP2,FAM83H,IGSF3,P2RY2,BCAM,PKP3,PLEKHG3,RAB5IF,PDGFB,RASEF,CCNJL,MYO5B,EEF1A2,SDC4,ARHGEF16,EPB41L1,PAK4,F11R,PTPRF,TNFRSF21,WNT7B,CYB561,LAPTM4B,TFAP2C,CDS1,LLGL2,FOXA1,KIAA1671,MAP7,PON3,ETNK2,IQANK1,VAPB,TSPAN13,SOWAHC,PCDH1,MAP3K9,ESRP2,AGRN,EFNA5,KIAA0895,YIPF6,ST6GALNAC2,PERP,TMEM132A,CEP170B,TACSTD2,TMEM30B,TMEM54,DSG…
GO:BP	cytoskeleton organization	GO:0007010	2.04714e-14	45.4734	13.6889	1401	706	121	18911	KRT8,CELSR1,SHTN1,KRT18,BAIAP2L1,HSPA1A,HSPA1B,PPL,BAIAP2,FAM83H,CHMP4C,MYO5B,SDC4,EPB41L1,PAK4,F11R,KRT15,AIF1L,MYH14,LLGL2,MAP7,MET,AGRN,EFNA5,TACSTD2,CTTN,TACC2,SSH3,CDC42BPG,TJP1,SIX4,KRT4,CAPN2,PLS1,WASL,PKP2,AURKA,SPIRE2,KRT19,ID1,LMNA,DSP,PLK2,NCKAP1,BFSP1,PARD6B,PLEK2,MISP,SPTBN2,EVPL,CLDN3,OCLN,BCAR1,PPFIA1,COBL,EPPK1,SEMA3E,PLEC,PARD3,LIMCH1,MICALL2,PXN,HOOK1,OBSL1,FHDC1,ARPC1A,PACSIN3,…
GO:CC	cell junction	GO:0030054	2.14134e-14	45.4085	13.6693	2102	1696	309	18911	LAMA5,KRT8,KRT18,BAIAP2L1,HSPA1A,HSPA1B,PPL,CLDN4,BAIAP2,PKP3,EEF1A2,EPCAM,SDC4,PAK4,GRB7,F11R,PATJ,AIF1L,ARHGAP39,ITGB4,PCDH1,CGN,ITGB6,STARD10,AGRN,EFNA5,PERP,CDH1,DSG2,CLDN9,CLDN1,CTTN,SYT12,ZNF185,ATP1B1,LSR,TSPAN1,TJP1,MARVELD3,STON2,DSC2,STAU1,CAPN2,PLEKHG6,CLDN7,C4ORF19,PKP2,KIFC3,MARVELD2,CTNND1,CDH3,GRHL2,DLG5,DSP,NCKAP1,SYT7,SEMA4B,JUP,KDF1,PARD6B,CACNG4,ITGA3,PANX2,IRF6,GIPC1,MISP,SPTB…
TF	Factor: WT1; motif: GNGGGGGCGGGG; match class: 1	TF:M03893_1	2.69918e-14	45.0745	13.5688	3864	3337	896	18911	TSPAN15,KIAA1522,CELSR1,BAIAP2L1,RHPN2,WWC1,PPL,BAIAP2,TLCD1,PLPP2,FAM83H,IGSF3,P2RY2,PKP3,PDGFB,RASEF,MYO5B,EEF1A2,ARHGEF16,PAK4,GRB7,PTPRF,PATJ,MYH14,CYB561,ANKEF1,SLC39A1,CDS1,LLGL2,FOXA1,VWA1,ETNK2,IQANK1,KLC3,TSPAN13,SOWAHC,PCDH1,C19ORF33,AGRN,CEP170B,HES1,TRIM47,CTTN,BCAP31,FNBP1L,CARD10,WNT9A,JAG2,ATP1B1,CLMN,PTPN3,SSH3,GPRC5C,CDC42BPG,PRPF6,TJP1,CMTM4,GRAMD2A,SHB,SLC2A4RG,GRHL1,PPP1R26,RA…
TF	Factor: Sp1; motif: GGGGCGGGGC	TF:M00931	3.04818e-14	44.899	13.516	9900	4357	2623	18911	TSPAN15,KIAA1522,CTSV,LAMA5,KRT8,CELSR1,TUFT1,SHTN1,RIPK4,TMEM184A,KRT18,BAIAP2L1,EFNA1,RHPN2,SOX13,HSPA1A,HSPA1B,WWC1,PPL,CLDN4,FAM241B,BAIAP2,MAL2,TOM1L1,TLCD1,PLPP2,PIP4K2C,FAM83H,IGSF3,P2RY2,BCAM,PKP3,CHMP4C,PDGFB,RASEF,CCNJL,SPR,MYO5B,EEF1A2,EPCAM,SDC4,ARHGEF16,PAK4,GRB7,F11R,WFDC2,PTPRF,PATJ,TNFRSF21,WNT7B,KRT15,AIF1L,MYH14,CYB561,PIGT,LAPTM4B,ANKEF1,TFAP2C,SLC39A1,CDS1,LLGL2,FOXA1,B3GNT5,S…
TF	Factor: Egr-1; motif: GCGGGGGCGG	TF:M07354	3.27547e-14	44.7953	13.4847	7527	3088	1496	18911	TSPAN15,KIAA1522,CTSV,LAMA5,KRT8,CELSR1,SHTN1,KRT18,BAIAP2L1,RHPN2,HSPA1A,WWC1,PPL,FAM241B,BAIAP2,ADGRG1,MAL2,TLCD1,PLPP2,FAM83H,IGSF3,BCAM,PDGFB,RASEF,CCNJL,MYO5B,EEF1A2,EPCAM,SDC4,ARHGEF16,PAK4,GRB7,WFDC2,PTPRF,PATJ,WNT7B,AIF1L,MYH14,ARHGAP39,CYB561,LAPTM4B,ANKEF1,TFAP2C,SLC39A1,CDS1,LLGL2,FOXA1,KIAA1671,B3GNT5,MAP7,VWA1,ETNK2,IQANK1,KLC3,TSPAN13,SOWAHC,PCDH1,C19ORF33,MAP3K9,ESRP2,STARD10,ACOT4…
TF	Factor: SP1; motif: GGGGYGGGGNS	TF:M01303	3.96149e-14	44.521	13.4021	7598	3660	1766	18911	LAMA5,KRT8,CELSR1,SHTN1,TMEM184A,KRT80,KRT18,BAIAP2L1,EFNA1,RHPN2,SOX13,HSPA1A,PPL,FAM241B,BAIAP2,ADGRG1,TLCD1,PLPP2,PIP4K2C,FAM83H,IGSF3,P2RY2,BCAM,PKP3,CHMP4C,CCNJL,SPR,MYO5B,EEF1A2,EPCAM,SDC4,ARHGEF16,NHLRC1,PAK4,GRB7,F11R,WFDC2,PTPRF,PATJ,WNT7B,KRT15,MYH14,CYB561,TSPAN6,PIGT,LAPTM4B,ANKEF1,CDS1,LLGL2,B3GNT5,VWA1,ETNK2,IQANK1,KLC3,VAPB,TSPAN13,SOWAHC,PCDH1,LYPD3,CGN,MAP3K9,ESRP2,ESRP1,AGRN,ST6…
TF	Factor: KROX; motif: CCCGCCCCCRCCCC	TF:M00982	4.32674e-14	44.3937	13.3638	7552	3320	1600	18911	TSPAN15,KIAA1522,CTSV,LAMA5,KRT8,CELSR1,SHTN1,RIPK4,TMEM184A,KRT18,EFNA1,RHPN2,WWC1,PPL,FAM241B,BAIAP2,MAL2,TLCD1,PLPP2,FAM83H,IGSF3,BCAM,PDGFB,RASEF,CCNJL,MYO5B,EEF1A2,SDC4,ARHGEF16,PAK4,GRB7,PTPRF,PATJ,WNT7B,AIF1L,MYH14,CYB561,TSPAN6,LAPTM4B,ANKEF1,TFAP2C,SLC39A1,CDS1,LLGL2,KIAA1671,B3GNT5,VWA1,ETNK2,IQANK1,KLC3,VAPB,TSPAN13,SOWAHC,PCDH1,C19ORF33,MAP3K9,ESRP2,ACOT4,AGRN,EFNA5,SFN,KIAA0895,ST6GA…
TF	Factor: Sp1; motif: NGGGGCGGGGN	TF:M07395	4.99722e-14	44.1859	13.3013	10237	2908	1851	18911	TSPAN15,KIAA1522,CTSV,LAMA5,KRT8,CELSR1,TUFT1,SHTN1,RIPK4,TMEM184A,KRT80,KRT18,BAIAP2L1,EFNA1,RHPN2,HSPA1A,HSPA1B,WWC1,PPL,CLDN4,FAM241B,BAIAP2,MAL2,TOM1L1,TLCD1,PLPP2,PIP4K2C,FAM83H,IGSF3,P2RY2,BCAM,PKP3,CHMP4C,PLEKHG3,PDGFB,RASEF,CCNJL,SPR,MYO5B,EEF1A2,EPCAM,SDC4,ARHGEF16,PAK4,GRB7,F11R,WFDC2,PTPRF,PATJ,TNFRSF21,WNT7B,KRT15,MYH14,CYB561,PIGT,LAPTM4B,ANKEF1,TFAP2C,SLC39A1,CDS1,LLGL2,FOXA1,B3GNT5…
TF	Factor: RNF96; motif: BCCCGCRGCC	TF:M01199	5.63221e-14	44.0133	13.2493	8169	3282	1698	18911	KIAA1522,CTSV,LAMA5,CELSR1,TUFT1,SHTN1,RIPK4,TMEM184A,KRT80,BAIAP2L1,RHPN2,MLF1,WWC1,BAIAP2,MAL2,TLCD1,PLPP2,PIP4K2C,FAM83H,P2RY2,BCAM,PKP3,PDGFB,CCNJL,SPR,MYO5B,EEF1A2,SDC4,ARHGEF16,EPB41L1,PAK4,F11R,PTPRF,PATJ,TNFRSF21,WNT7B,KRT15,AIF1L,CYB561,PIGT,LAPTM4B,SLC39A1,CDS1,LLGL2,FOXA1,B3GNT5,MAP7,VWA1,PON3,ETNK2,IQANK1,VAPB,SOWAHC,PCDH1,MAP3K9,ESRP2,KRT7,AGRN,EFNA5,SFN,KIAA0895,ST6GALNAC2,PERP,CEP1…
GO:BP	animal organ morphogenesis	GO:0009887	5.83246e-14	43.9629	13.2341	1088	4400	377	18911	LAMA5,CELSR1,TUFT1,EFNA1,DDR1,ELF3,WNT7B,TSKU,SLC39A1,ITGB4,FOXA1,ITGB6,ESRP2,THRB,AGRN,PERP,HES1,TACSTD2,LAMB3,SDC1,WNT9A,JAG2,OVOL2,TGFA,SIX4,PLS1,TFAP2A,LAMC2,PKP2,GRHL2,ID1,DLG5,DSP,LAMA3,ERRFI1,POR,SYCP2,EGFR,LRP5,RYK,BARX2,LTBP3,EPHA2,OBSL1,PSMA7,GNGT1,ALDH1A3,LFNG,ADGRG6,LAMB1,ADAM15,MYO6,RAC1,CTNNA1,PBX1,SCRIB,FOLR1,HOXC13,DGCR6,TLE1,SHANK2,PSMC4,PPP1R13L,DAG1,ITGA2,LRIG3,PAX9,NTF4,RYR1,K…
TF	Factor: Sp2; motif: GGSNNGGGGGCGGGGCCNGNGS; match class: 1	TF:M09658_1	7.15132e-14	43.6688	13.1456	1970	2841	445	18911	TSPAN15,KRT8,CELSR1,KRT18,BAIAP2L1,BAIAP2,TLCD1,BCAM,EEF1A2,SDC4,ARHGEF16,GRB7,ANKEF1,CDS1,LLGL2,B3GNT5,PCDH1,C19ORF33,MAP3K9,AGRN,CTTN,BCAP31,RCE1,SDC1,WNT9A,JAG2,ATP1B1,CLMN,CDC42BPG,TJP1,CMTM4,SHB,SLC2A4RG,GRHL1,PPP1R26,RAP1GAP,PLEKHG6,INHBB,MPP3,PKP2,KLF5,MARVELD2,G6PD,TBC1D8,SPIRE2,DSP,SYT7,CUEDC1,PANX2,ABHD11,TMEM40,NUDT14,PLEKHA7,SEZ6L2,STX1A,BCAR1,RYK,HID1,IL13RA1,CTSD,COBL,BARX2,MRGBP,HM…
TF	Factor: AP-2; motif: MKCCCSCNGGCG	TF:M00189	7.51794e-14	43.5967	13.1239	10195	1269	860	18911	KIAA1522,CTSV,LAMA5,CELSR1,TUFT1,SHTN1,RIPK4,TMEM184A,KRT80,BAIAP2L1,EFNA1,RHPN2,WWC1,PPL,DDR1,CLDN4,FAM241B,BAIAP2,ADGRG1,MAL2,TOM1L1,TLCD1,PLPP2,PIP4K2C,FAM83H,P2RY2,PKP3,CHMP4C,PLEKHG3,RAB5IF,PDGFB,RASEF,CCNJL,SPR,MYO5B,EEF1A2,SDC4,ARHGEF16,NHLRC1,F11R,WFDC2,PTPRF,PATJ,TNFRSF21,WNT7B,AIF1L,MYH14,ARHGAP39,CYB561,TSPAN6,PIGT,LAPTM4B,TFAP2C,SLC39A1,CDS1,LLGL2,SCNN1A,MAP7,VWA1,PON3,ETNK2,IQANK1,KL…
TF	Factor: E2F-2; motif: GCGCGCGCNCS; match class: 1	TF:M11529_1	8.16169e-14	43.4781	13.0882	13858	3111	2565	18911	TSPAN15,KIAA1522,CTSV,LAMA5,KRT8,CELSR1,TUFT1,SHTN1,RIPK4,TMEM184A,KRT80,KRT18,BAIAP2L1,EFNA1,RHPN2,SOX13,HSPA1A,MLF1,HSPA1B,DDX27,WWC1,PPL,MAP3K13,CLDN4,FAM241B,BAIAP2,ADGRG1,MAL2,TOM1L1,TLCD1,PLPP2,FAM83H,IGSF3,P2RY2,BCAM,PKP3,CHMP4C,PLEKHG3,RAB5IF,PDGFB,RASEF,CCNJL,SPR,ELF3,MYO5B,EEF1A2,EPCAM,SDC4,ARHGEF16,NHLRC1,EPB41L1,PAK4,GRB7,F11R,WFDC2,PTPRF,PATJ,TNFRSF21,WNT7B,AIF1L,MYH14,CYB561,PIGT,LA…
TF	Factor: HIC1; motif: NSNNNNTGCCCSSNN	TF:M01072	9.88313e-14	43.202	13.0051	4008	2773	791	18911	LAMA5,CELSR1,TUFT1,SHTN1,RIPK4,BAIAP2L1,RHPN2,MLF1,BAIAP2,MAL2,TOM1L1,BCAM,PKP3,PDGFB,SPR,MYO5B,ARHGEF16,EPB41L1,GRB7,PATJ,TNFRSF21,WNT7B,MYH14,LAPTM4B,SLC39A1,CDS1,LLGL2,FOXA1,KIAA1671,VWA1,KLC3,VAPB,MET,PCDH1,CGN,MAP3K9,PMEPA1,ACOT4,ST6GALNAC2,TMEM132A,CEP170B,TMEM30B,DSG2,TRIM47,CTTN,BCAP31,SDC1,SYT12,FNBP1L,WNT9A,JAG2,TACC2,GET4,OVOL2,SSH3,CDC42BPG,PRPF6,TGFA,CMTM4,DSC2,SLC2A4RG,RAP1GAP,CAPN2…
TF	Factor: AP-2gamma; motif: GCCYNNGGS	TF:M00470	1.01859e-13	43.1585	12.992	9038	2854	1636	18911	KIAA1522,CTSV,LAMA5,KRT8,CELSR1,TUFT1,SHTN1,RIPK4,TMEM184A,KRT80,KRT18,BAIAP2L1,EFNA1,RHPN2,SOX13,PPL,DDR1,CLDN4,BAIAP2,ADGRG1,MAL2,TLCD1,PLPP2,FAM83H,IGSF3,P2RY2,BCAM,PKP3,CHMP4C,PLEKHG3,PDGFB,PRXL2A,CCNJL,SPR,ELF3,MYO5B,EEF1A2,EPCAM,SDC4,ARHGEF16,NHLRC1,EPB41L1,PAK4,F11R,PTPRF,PATJ,TNFRSF21,WNT7B,KRT15,MYH14,ARHGAP39,CYB561,PIGT,LAPTM4B,TFAP2C,SLC39A1,CDS1,LLGL2,FOXA1,MAP7,ETNK2,IQANK1,SOWAHC,P…
GO:MF	cadherin binding	GO:0045296	1.14581e-13	42.9887	12.9409	319	3442	123	18911	SHTN1,KRT18,BAIAP2L1,HSPA1A,PPL,BAIAP2,PKP3,EPCAM,ARHGEF16,PAK4,F11R,VAPB,CGN,SFN,CDH1,CTTN,FNBP1L,TJP1,PKP2,CTNND1,CDH3,GPRC5A,LAD1,JUP,GIPC1,SPTBN2,EVPL,EGFR,EPS8L1,PLEC,EPHA2,TNKS1BP1,CHMP4B,TRIM29,CTNNA1,SCRIB,PHLDB2,PPP1R13L,ANLN,EPS8L2,SLC9A3R2,RDX,ANK3,PAK6,BAG3,DOCK9,S100A11,ANXA2,AFDN,PTPRH,S100P,CAST,SRC,EPN2,CD46,MPP7,TES,DAB2IP,AHNAK,CSNK1D,CEMIP2,CORO1B,DNAJB1,MB21D2,PTPN1,COBLL1,YWH…
TF	Factor: GKLF; motif: GCCMCRCCCNNN; match class: 1	TF:M01588_1	1.14639e-13	42.988	12.9407	3835	2821	769	18911	TSPAN15,CTSV,LAMA5,KRT8,CELSR1,TUFT1,SHTN1,RIPK4,KRT18,BAIAP2L1,EFNA1,RHPN2,WWC1,PPL,DDR1,BAIAP2,TOM1L1,PIP4K2C,FAM83H,IGSF3,P2RY2,BCAM,PKP3,MYO5B,EEF1A2,ARHGEF16,PAK4,GRB7,WFDC2,KRT15,MYH14,TFAP2C,CDS1,LLGL2,B3GNT5,VWA1,ETNK2,IQANK1,KLC3,TSPAN13,MET,SOWAHC,C19ORF33,LYPD3,CGN,MAP3K9,AGRN,SFN,CEP170B,TMEM54,LAMB3,DSG2,CTTN,BCAP31,RCE1,SDC1,WNT9A,C6ORF141,JAG2,CLMN,PTPN3,GPRC5C,TJP1,CMTM4,SHB,RGL3,…
TF	Factor: Sp2; motif: TGGGCGCGCCCA	TF:M06948	1.17694e-13	42.95	12.9292	8512	3277	1762	18911	TSPAN15,CTSV,LAMA5,CELSR1,TUFT1,SHTN1,RIPK4,BAIAP2L1,RHPN2,SOX13,HSPA1A,WWC1,PPL,FAM241B,BAIAP2,ADGRG1,MAL2,TLCD1,PLPP2,FAM83H,BCAM,PKP3,CHMP4C,PDGFB,RASEF,CCNJL,SPR,MYO5B,EEF1A2,EPCAM,SDC4,ARHGEF16,PAK4,GRB7,WFDC2,PTPRF,PATJ,WNT7B,AIF1L,MYH14,CYB561,LAPTM4B,SLC39A1,LLGL2,KIAA1671,B3GNT5,MAP7,VWA1,ETNK2,IQANK1,VAPB,TSPAN13,MET,SOWAHC,PCDH1,C19ORF33,PMEPA1,ESRP2,STARD10,ACOT4,KRT7,AGRN,EFNA5,KIAA0…
TF	Factor: Sp1; motif: GGGGCGGGGC	TF:M07063	1.36308e-13	42.7382	12.8655	7410	4350	2018	18911	TSPAN15,CTSV,LAMA5,KRT8,CELSR1,TUFT1,SHTN1,TMEM184A,KRT18,BAIAP2L1,EFNA1,RHPN2,WWC1,PPL,BAIAP2,MAL2,TLCD1,PLPP2,PIP4K2C,FAM83H,IGSF3,P2RY2,BCAM,PKP3,CHMP4C,CCNJL,SPR,MYO5B,EEF1A2,EPCAM,SDC4,ARHGEF16,PAK4,GRB7,WFDC2,PTPRF,PATJ,TNFRSF21,WNT7B,KRT15,MYH14,CYB561,PIGT,LAPTM4B,ANKEF1,TFAP2C,CDS1,LLGL2,FOXA1,B3GNT5,VWA1,ETNK2,IQANK1,KLC3,VAPB,TSPAN13,SOWAHC,PCDH1,C19ORF33,LYPD3,CGN,MAP3K9,ESRP2,ESRP1,K…
TF	Factor: Sp2; motif: GGGGCGGGG	TF:M10435	1.36308e-13	42.7382	12.8655	7410	4350	2018	18911	TSPAN15,CTSV,LAMA5,KRT8,CELSR1,TUFT1,SHTN1,TMEM184A,KRT18,BAIAP2L1,EFNA1,RHPN2,WWC1,PPL,BAIAP2,MAL2,TLCD1,PLPP2,PIP4K2C,FAM83H,IGSF3,P2RY2,BCAM,PKP3,CHMP4C,CCNJL,SPR,MYO5B,EEF1A2,EPCAM,SDC4,ARHGEF16,PAK4,GRB7,WFDC2,PTPRF,PATJ,TNFRSF21,WNT7B,KRT15,MYH14,CYB561,PIGT,LAPTM4B,ANKEF1,TFAP2C,CDS1,LLGL2,FOXA1,B3GNT5,VWA1,ETNK2,IQANK1,KLC3,VAPB,TSPAN13,SOWAHC,PCDH1,C19ORF33,LYPD3,CGN,MAP3K9,ESRP2,ESRP1,K…
TF	Factor: Sp1; motif: NGGGGGCGGGGYN	TF:M00196	2.02825e-13	42.1648	12.6929	9852	4350	2602	18911	TSPAN15,KIAA1522,CTSV,LAMA5,KRT8,CELSR1,TUFT1,SHTN1,RIPK4,TMEM184A,KRT18,BAIAP2L1,EFNA1,RHPN2,HSPA1A,HSPA1B,WWC1,PPL,CLDN4,BAIAP2,MAL2,TOM1L1,TLCD1,PLPP2,PIP4K2C,FAM83H,IGSF3,P2RY2,BCAM,PKP3,CHMP4C,PDGFB,RASEF,CCNJL,SPR,MYO5B,EEF1A2,EPCAM,SDC4,ARHGEF16,PAK4,GRB7,F11R,WFDC2,PTPRF,PATJ,TNFRSF21,WNT7B,KRT15,AIF1L,MYH14,CYB561,PIGT,LAPTM4B,ANKEF1,TFAP2C,SLC39A1,CDS1,LLGL2,FOXA1,B3GNT5,MAP7,VWA1,PON3,…
TF	Factor: MAZ; motif: GGGMGGGGSSGGGGGGGGGGGG; match class: 1	TF:M09636_1	2.19403e-13	42.0515	12.6588	13497	3007	2426	18911	TSPAN15,KIAA1522,CTSV,LAMA5,KRT8,CELSR1,TUFT1,SHTN1,RIPK4,TMEM184A,KRT80,KRT18,BAIAP2L1,EFNA1,RHPN2,SOX13,HSPA1A,MLF1,HSPA1B,WWC1,PPL,MAP3K13,DDR1,CLDN4,FAM241B,BAIAP2,ADGRG1,MAL2,TOM1L1,TLCD1,PLPP2,PIP4K2C,FAM83H,IGSF3,P2RY2,BCAM,PKP3,CHMP4C,PLEKHG3,RAB5IF,PDGFB,RASEF,PRXL2A,CCNJL,SPR,MYO5B,EEF1A2,EPCAM,SDC4,ARHGEF16,NHLRC1,PAK4,GRB7,F11R,WFDC2,PTPRF,PATJ,TNFRSF21,WNT7B,KRT15,AIF1L,MYH14,ARHGAP3…
TF	Factor: Sp2; motif: NYSGCCCCGCCCCCY	TF:M03567	2.29928e-13	41.9839	12.6384	7430	4344	2017	18911	TSPAN15,KIAA1522,LAMA5,KRT8,CELSR1,TUFT1,SHTN1,RIPK4,TMEM184A,KRT18,BAIAP2L1,EFNA1,RHPN2,WWC1,PPL,BAIAP2,MAL2,TLCD1,PLPP2,PIP4K2C,FAM83H,IGSF3,P2RY2,BCAM,PKP3,CHMP4C,RASEF,CCNJL,SPR,MYO5B,EEF1A2,EPCAM,SDC4,ARHGEF16,PAK4,GRB7,F11R,WFDC2,PTPRF,PATJ,MYH14,CYB561,PIGT,LAPTM4B,ANKEF1,TFAP2C,SLC39A1,CDS1,LLGL2,FOXA1,B3GNT5,MAP7,VWA1,PON3,ETNK2,IQANK1,KLC3,VAPB,TSPAN13,MET,SOWAHC,PCDH1,C19ORF33,LYPD3,CG…
TF	Factor: Sp3; motif: GGGGCGGGGSNN	TF:M07615	2.52331e-13	41.8497	12.598	6570	3593	1518	18911	TSPAN15,LAMA5,KRT8,CELSR1,TUFT1,SHTN1,TMEM184A,KRT18,BAIAP2L1,EFNA1,RHPN2,WWC1,PPL,BAIAP2,MAL2,TLCD1,PLPP2,PIP4K2C,FAM83H,IGSF3,P2RY2,BCAM,PKP3,CHMP4C,CCNJL,SPR,MYO5B,EEF1A2,EPCAM,SDC4,ARHGEF16,PAK4,GRB7,WFDC2,PTPRF,PATJ,TNFRSF21,MYH14,CYB561,PIGT,LAPTM4B,ANKEF1,TFAP2C,CDS1,LLGL2,FOXA1,B3GNT5,VWA1,ETNK2,IQANK1,KLC3,VAPB,TSPAN13,SOWAHC,PCDH1,C19ORF33,LYPD3,CGN,MAP3K9,ESRP2,ESRP1,KRT7,AGRN,CEP170B,…
TF	Factor: Sp1; motif: NNGGGGCGGGGNN	TF:M00932	2.92283e-13	41.6377	12.5342	10027	4350	2643	18911	TSPAN15,KIAA1522,CTSV,LAMA5,KRT8,CELSR1,TUFT1,SHTN1,RIPK4,TMEM184A,KRT80,KRT18,BAIAP2L1,EFNA1,RHPN2,SOX13,HSPA1A,HSPA1B,WWC1,PPL,DDR1,CLDN4,FAM241B,BAIAP2,MAL2,TOM1L1,TLCD1,PLPP2,PIP4K2C,FAM83H,IGSF3,P2RY2,BCAM,PKP3,CHMP4C,PDGFB,RASEF,CCNJL,SPR,MYO5B,EEF1A2,EPCAM,SDC4,ARHGEF16,PAK4,GRB7,F11R,WFDC2,PTPRF,PATJ,TNFRSF21,WNT7B,KRT15,AIF1L,MYH14,CYB561,PIGT,LAPTM4B,ANKEF1,TFAP2C,SLC39A1,CDS1,LLGL2,FOX…
TF	Factor: SP1; motif: NRGKGGGCGGGGCN; match class: 1	TF:M09765_1	3.52399e-13	41.3679	12.453	3217	2843	664	18911	CTSV,LAMA5,CELSR1,SHTN1,BAIAP2L1,RHPN2,WWC1,PPL,BAIAP2,TLCD1,PIP4K2C,FAM83H,IGSF3,P2RY2,BCAM,PKP3,SPR,EEF1A2,ARHGEF16,GRB7,PATJ,MYH14,CYB561,ANKEF1,CDS1,LLGL2,B3GNT5,IQANK1,KLC3,TSPAN13,MET,SOWAHC,LYPD3,CGN,MAP3K9,AGRN,CEP170B,CTTN,BCAP31,RCE1,SDC1,WNT9A,JAG2,CLMN,PTPN3,CDC42BPG,PRPF6,TJP1,CMTM4,SHB,RGL3,SLC2A4RG,GRHL1,PPP1R26,RAP1GAP,PLEKHG6,INHBB,MPP3,PKP2,KLF5,MARVELD2,G6PD,TBC1D8,CDH3,SPIRE2,…
HPA	cervix, uterine	HPA:0110000	5.39379e-13	40.7538	12.2681	6589	2010	875	18911	TSPAN15,KIAA1522,KRT8,TUFT1,RIPK4,KRT18,BAIAP2L1,HSPA1A,HSPA1B,WWC1,PPL,DDR1,CLDN4,BAIAP2,TLCD1,PIP4K2C,FAM83H,PKP3,CHMP4C,PLEKHG3,PDGFB,RASEF,PRXL2A,CCNJL,ELF3,MYO5B,EPCAM,SDC4,ARHGEF16,EPB41L1,GRB7,F11R,WFDC2,PATJ,TNFRSF21,MYH14,CYB561,TSPAN6,ANKEF1,TFAP2C,ITGB4,CDS1,KIAA1671,SCNN1A,MAP7,ETNK2,KLC3,VAPB,MET,SOWAHC,PCDH1,LYPD3,CGN,MAP3K9,ESRP1,KRT7,EFNA5,SFN,TACSTD2,CDH1,S100A2,DSG2,CLDN1,CTTN,B…
TF	Factor: KROX; motif: CCCGCCCCCRCCCC; match class: 1	TF:M00982_1	5.60014e-13	40.6996	12.2518	3411	2851	698	18911	KIAA1522,CELSR1,RHPN2,PPL,FAM241B,BAIAP2,TLCD1,PLPP2,FAM83H,IGSF3,PDGFB,RASEF,MYO5B,EEF1A2,SDC4,ARHGEF16,PAK4,PTPRF,PATJ,AIF1L,CYB561,ANKEF1,LLGL2,B3GNT5,VWA1,ETNK2,IQANK1,TSPAN13,SOWAHC,PCDH1,C19ORF33,ESRP2,AGRN,ST6GALNAC2,CEP170B,CDH1,CTTN,BCAP31,SDC1,CARD10,WNT9A,JAG2,ATP1B1,CLMN,PTPN3,LSR,GPRC5C,CDC42BPG,TJP1,CMTM4,SHB,RGL3,SLC2A4RG,GRHL1,PPP1R26,RAP1GAP,REPS2,WASL,MUC1,PKP2,KLF5,G6PD,CDH3,SP…
MIRNA	MIRNA root	MIRNA:000000	5.67531e-13	40.6804	12.246	14449	2843	2390	18911	TSPAN15,KIAA1522,CTSV,LAMA5,KRT8,CELSR1,TUFT1,SHTN1,RIPK4,TMEM184A,KRT80,KRT18,BAIAP2L1,EFNA1,RHPN2,SOX13,HSPA1A,MLF1,HSPA1B,DDX27,WWC1,PPL,MAP3K13,DDR1,CLDN4,FAM241B,BAIAP2,ADGRG1,MAL2,TOM1L1,PLPP2,PIP4K2C,FAM83H,IGSF3,P2RY2,BCAM,CHMP4C,PLEKHG3,RAB5IF,PDGFB,RASEF,PRXL2A,SPR,ELF3,MYO5B,EEF1A2,SDC4,EPB41L1,PAK4,GRB7,F11R,PTPRF,PATJ,TNFRSF21,WNT7B,KRT15,TSKU,AIF1L,MYH14,ARHGAP39,CYB561,TSPAN6,PIGT,…
TF	Factor: Sp3; motif: GGGGCGGGGSNN; match class: 1	TF:M07615_1	5.70464e-13	40.6729	12.2438	2805	2846	590	18911	KRT8,CELSR1,KRT18,RHPN2,BAIAP2,TLCD1,PLPP2,PIP4K2C,FAM83H,IGSF3,BCAM,CCNJL,EEF1A2,SDC4,ARHGEF16,GRB7,PATJ,MYH14,CYB561,ANKEF1,CDS1,LLGL2,B3GNT5,ETNK2,IQANK1,KLC3,SOWAHC,LYPD3,CGN,MAP3K9,KRT7,AGRN,CEP170B,DSG2,CTTN,BCAP31,RCE1,WNT9A,JAG2,OVOL2,CLMN,PTPN3,CDC42BPG,TJP1,CMTM4,SHB,RGL3,SLC2A4RG,GRHL1,PPP1R26,RAP1GAP,PLEKHG6,INHBB,MPP3,PKP2,KLF5,MARVELD2,G6PD,TBC1D8,SPIRE2,NANOS1,PLK2,CUEDC1,SEMA4B,KD…
REAC	Cell-Cell communication	REAC:R-HSA-1500931	6.19605e-13	40.5537	12.2079	127	527	26	18911	CLDN4,F11R,PATJ,ITGB4,CDH1,LAMB3,CLDN9,CLDN1,WASL,CLDN7,LAMC2,CTNND1,CDH3,JUP,PARD6B,LAMA3,CLDN3,NECTIN4,PLEC,PARD3,PXN,PVR,DST,CTNNA1,NECTIN2,CRB3
GO:CC	cell periphery	GO:0071944	6.66146e-13	40.4492	12.1764	5359	785	351	18911	TSPAN15,CTSV,KRT8,CELSR1,TMEM184A,KRT18,BAIAP2L1,EFNA1,HSPA1A,HSPA1B,WWC1,PPL,DDR1,CLDN4,BAIAP2,ADGRG1,MAL2,TLCD1,PLPP2,P2RY2,BCAM,PKP3,CHMP4C,PDGFB,MYO5B,EPCAM,SDC4,EPB41L1,GRB7,F11R,PTPRF,PATJ,TNFRSF21,WNT7B,AIF1L,TSPAN6,LAPTM4B,SLC39A1,ITGB4,LLGL2,SCNN1A,MAP7,VAPB,TSPAN13,MET,PCDH1,C19ORF33,LYPD3,CGN,ITGB6,PMEPA1,AGRN,TRIM16L,EFNA5,PERP,TACSTD2,CDH1,TMEM30B,DSG2,EPN3,CLDN9,CLDN1,CTTN,BCAP31,RC…
TF	Factor: Sp2; motif: GGGGCGGGG; match class: 1	TF:M10435_1	6.74734e-13	40.4307	12.1709	3389	2846	693	18911	KRT8,CELSR1,KRT18,EFNA1,RHPN2,BAIAP2,TLCD1,PLPP2,PIP4K2C,FAM83H,IGSF3,BCAM,PKP3,CCNJL,EEF1A2,SDC4,ARHGEF16,GRB7,WFDC2,PATJ,MYH14,CYB561,ANKEF1,CDS1,LLGL2,B3GNT5,ETNK2,IQANK1,KLC3,VAPB,SOWAHC,LYPD3,CGN,MAP3K9,KRT7,AGRN,CEP170B,DSG2,CTTN,BCAP31,RCE1,SDC1,WNT9A,JAG2,OVOL2,CLMN,PTPN3,CDC42BPG,PRPF6,TGFA,TJP1,CMTM4,SHB,RGL3,SLC2A4RG,GRHL1,PPP1R26,RAP1GAP,PLEKHG6,INHBB,MUC1,MPP3,PKP2,KLF5,MARVELD2,CITE…
TF	Factor: Sp1; motif: GGGGCGGGGC; match class: 1	TF:M07063_1	6.74734e-13	40.4307	12.1709	3389	2846	693	18911	KRT8,CELSR1,KRT18,EFNA1,RHPN2,BAIAP2,TLCD1,PLPP2,PIP4K2C,FAM83H,IGSF3,BCAM,PKP3,CCNJL,EEF1A2,SDC4,ARHGEF16,GRB7,WFDC2,PATJ,MYH14,CYB561,ANKEF1,CDS1,LLGL2,B3GNT5,ETNK2,IQANK1,KLC3,VAPB,SOWAHC,LYPD3,CGN,MAP3K9,KRT7,AGRN,CEP170B,DSG2,CTTN,BCAP31,RCE1,SDC1,WNT9A,JAG2,OVOL2,CLMN,PTPN3,CDC42BPG,PRPF6,TGFA,TJP1,CMTM4,SHB,RGL3,SLC2A4RG,GRHL1,PPP1R26,RAP1GAP,PLEKHG6,INHBB,MUC1,MPP3,PKP2,KLF5,MARVELD2,CITE…
TF	Factor: MOVO-B; motif: GNGGGGG; match class: 1	TF:M01104_1	7.78414e-13	40.2245	12.1088	5445	3467	1240	18911	KIAA1522,KRT8,CELSR1,KRT18,EFNA1,RHPN2,HSPA1A,WWC1,CLDN4,BAIAP2,TLCD1,PLPP2,FAM83H,IGSF3,BCAM,PDGFB,RASEF,CCNJL,MYO5B,EEF1A2,EPCAM,SDC4,PAK4,PTPRF,PATJ,MYH14,CYB561,ANKEF1,LLGL2,FOXA1,B3GNT5,MAP7,ETNK2,IQANK1,KLC3,VAPB,MET,SOWAHC,MAP3K9,ESRP1,KRT7,AGRN,KIAA0895,CEP170B,HES1,TMEM30B,TMEM54,CLDN9,BCAP31,RCE1,SYT12,CARD10,JAG2,OVOL2,ATP1B1,ABCC3,CLMN,PTPN3,LSR,GPRC5C,CDC42BPG,PRPF6,TJP1,SHB,MOCS3,ST…
TF	Factor: ZIC4; motif: NNCCNCCCRYNGYGN; match class: 1	TF:M12227_1	8.19096e-13	40.151	12.0867	5682	2870	1091	18911	KIAA1522,CELSR1,TMEM184A,BAIAP2L1,EFNA1,PPL,FAM241B,BAIAP2,PLPP2,PIP4K2C,FAM83H,BCAM,PKP3,PLEKHG3,RAB5IF,RASEF,CCNJL,SPR,MYO5B,EEF1A2,EPCAM,SDC4,ARHGEF16,NHLRC1,WFDC2,PTPRF,PATJ,WNT7B,AIF1L,MYH14,CYB561,ANKEF1,TFAP2C,CDS1,LLGL2,FOXA1,B3GNT5,MAP7,VWA1,ETNK2,IQANK1,KLC3,VAPB,MET,SOWAHC,MAP3K9,ESRP2,AGRN,KIAA0895,ST6GALNAC2,TMEM132A,CEP170B,HES1,TMEM30B,TMEM54,DSG2,TRIM47,CTTN,BCAP31,RTL8A,PRSS22,RC…
TF	Factor: AP2; motif: GCCYGSGGSN; match class: 1	TF:M08867_1	1.10573e-12	39.7181	11.9563	5020	3606	1195	18911	KIAA1522,CTSV,LAMA5,KRT8,CELSR1,RIPK4,KRT80,KRT18,EFNA1,RHPN2,WWC1,FAM241B,BAIAP2,ADGRG1,MAL2,PLPP2,FAM83H,IGSF3,BCAM,PDGFB,CCNJL,EEF1A2,EPCAM,SDC4,ARHGEF16,PTPRF,PATJ,WNT7B,KRT15,MYH14,CYB561,CDS1,LLGL2,FOXA1,MAP7,IQANK1,VAPB,TSPAN13,MET,ESRP2,ESRP1,ACOT4,AGRN,EFNA5,KIAA0895,YIPF6,ST6GALNAC2,CEP170B,TMEM30B,TMEM54,CLDN9,CTTN,BCAP31,RTL8A,RCE1,SYT12,CARD10,WNT9A,C6ORF141,JAG2,TACC2,CLMN,PTPN3,SSH…
KEGG	Tight junction	KEGG:04530	1.13399e-12	39.6817	11.9454	168	1202	42	18911	CLDN4,F11R,PATJ,MYH14,LLGL2,CGN,CLDN9,CLDN1,CTTN,TJP1,MARVELD3,CLDN7,MARVELD2,PARD6B,CLDN3,OCLN,PARD3,MICALL2,ARPC1A,RAC1,SCRIB,PRKCZ,PRKAA2,CRB3,AMOTL2,ERBB2,RDX,TJP3,EPB41L4B,PPP2R2C,NEDD4L,CLDN8,AFDN,CLDN23,RAB13,SLC9A3R1,CLDN10,CACNA1D,SRC,ACTN4,PRKCI,MPP5
GO:BP	cornification	GO:0070268	1.27833e-12	39.5089	11.8934	111	1418	38	18911	KRT8,KRT80,KRT18,PPL,PKP3,KRT15,KRT7,PERP,DSG2,DSC2,KRT4,PKP2,KRT19,DSP,JUP,EVPL,PRSS8,KRT78,KLK5,ST14,TCHH,KRT86,KRT17,KRT6A,TMEM79,CYP26B1,PI3,KRT83,KRT81,KRT16,PCSK6,KRT23,SPINK5,KRT13,KRT5,IVL,SPRR1B,SPRR3
GO:CC	adherens junction	GO:0005912	1.36143e-12	39.418	11.866	174	1936	59	18911	KRT18,BAIAP2L1,BAIAP2,PKP3,PAK4,EFNA5,CDH1,TJP1,DSC2,PKP2,KIFC3,CTNND1,CDH3,DLG5,JUP,PLEKHA7,NECTIN4,PARD3,TNKS1BP1,PTPRK,PVR,CXADR,TRIM29,ADAM15,CDC42EP4,CCDC85C,CTNNA1,CAMSAP3,SCRIB,NECTIN2,DAG1,RDX,SYNM,AJUBA,S100A11,ANXA2,AFDN,PDZD11,EFNB2,MPP7,MPP5,FRMD5,EPB41L5,JAG1,CEACAM1,NPHP1,NECTIN1,PKP1,CDC42EP1,SHROOM2,ANXA1,DLL1,CDH5,CDH24,TMOD3,ITGA6,TJP2,SHROOM3,CNN3
TF	Factor: E2F-2; motif: GCGCGCGCGYW; match class: 1	TF:M11531_1	1.44088e-12	39.3362	11.8414	11859	3092	2220	18911	TSPAN15,KIAA1522,CTSV,LAMA5,KRT8,CELSR1,TUFT1,SHTN1,RIPK4,TMEM184A,KRT18,BAIAP2L1,EFNA1,RHPN2,HSPA1B,WWC1,PPL,CLDN4,FAM241B,BAIAP2,MAL2,TOM1L1,TLCD1,PLPP2,FAM83H,IGSF3,P2RY2,BCAM,PKP3,PLEKHG3,RAB5IF,PDGFB,RASEF,CCNJL,SPR,MYO5B,EEF1A2,EPCAM,SDC4,ARHGEF16,NHLRC1,EPB41L1,PAK4,F11R,WFDC2,PTPRF,PATJ,TNFRSF21,WNT7B,AIF1L,MYH14,CYB561,PIGT,LAPTM4B,ANKEF1,TFAP2C,SLC39A1,CDS1,LLGL2,FOXA1,B3GNT5,MAP7,VWA1,…
TF	Factor: EGR1; motif: NCNCCGCCCCCGCN	TF:M07208	1.84365e-12	38.9806	11.7343	5943	2935	1158	18911	TSPAN15,KIAA1522,CTSV,LAMA5,KRT8,TMEM184A,KRT18,BAIAP2L1,RHPN2,WWC1,PPL,BAIAP2,MAL2,TLCD1,PLPP2,FAM83H,P2RY2,BCAM,PDGFB,RASEF,CCNJL,EEF1A2,SDC4,ARHGEF16,PAK4,GRB7,PTPRF,PATJ,CYB561,LAPTM4B,ANKEF1,TFAP2C,SLC39A1,CDS1,LLGL2,FOXA1,KIAA1671,B3GNT5,ETNK2,IQANK1,TSPAN13,SOWAHC,PCDH1,C19ORF33,CGN,ESRP2,ESRP1,KRT7,AGRN,ST6GALNAC2,CEP170B,TMEM54,DSG2,CTTN,SDC1,FNBP1L,SLC25A13,CARD10,WNT9A,JAG2,OVOL2,ATP1B…
TF	Factor: EGR; motif: CGCCCCCGCNN	TF:M08878	1.87419e-12	38.9569	11.7272	7202	3498	1604	18911	TSPAN15,KIAA1522,CTSV,LAMA5,KRT8,SHTN1,KRT18,BAIAP2L1,RHPN2,HSPA1A,WWC1,PPL,FAM241B,BAIAP2,ADGRG1,MAL2,TLCD1,PLPP2,FAM83H,IGSF3,P2RY2,PDGFB,RASEF,CCNJL,MYO5B,EEF1A2,EPCAM,SDC4,ARHGEF16,PAK4,GRB7,WFDC2,PTPRF,PATJ,WNT7B,MYH14,CYB561,LAPTM4B,ANKEF1,TFAP2C,SLC39A1,CDS1,LLGL2,KIAA1671,B3GNT5,MAP7,VWA1,ETNK2,IQANK1,KLC3,TSPAN13,SOWAHC,PCDH1,C19ORF33,MAP3K9,ESRP2,ESRP1,STARD10,AGRN,KIAA0895,ST6GALNAC2,C…
TF	Factor: AP-2; motif: SNNNCCNCAGGCN; match class: 1	TF:M00915_1	2.23003e-12	38.7061	11.6517	4408	3787	1111	18911	KIAA1522,LAMA5,CELSR1,SHTN1,RIPK4,TMEM184A,WWC1,DDR1,FAM241B,BAIAP2,MAL2,TOM1L1,PLPP2,FAM83H,IGSF3,BCAM,PKP3,PDGFB,CCNJL,MYO5B,EEF1A2,ARHGEF16,GRB7,PATJ,KRT15,MYH14,CYB561,ITGB4,LLGL2,FOXA1,MAP7,VWA1,ETNK2,IQANK1,SOWAHC,MAP3K9,ESRP2,AGRN,CEP170B,TMEM54,DSG2,CTTN,RTL8A,SDC1,SYT12,FNBP1L,SLC25A13,CARD10,WNT9A,C6ORF141,JAG2,PTPN3,SSH3,GPRC5C,TJP1,CMTM4,GRAMD2A,SHB,MOCS3,STAU1,SLC2A4RG,GRHL1,RAP1GAP,…
TF	Factor: Slug; motif: SSSNNNKCACCTGN	TF:M07367	2.46232e-12	38.5631	11.6087	1611	3130	405	18911	KIAA1522,RHPN2,WWC1,FAM241B,MAL2,TOM1L1,TLCD1,PIP4K2C,FAM83H,BCAM,MYO5B,EPCAM,PATJ,TNFRSF21,CYB561,TFAP2C,LLGL2,FOXA1,KIAA1671,IQANK1,TSPAN13,SOWAHC,PCDH1,ESRP2,CEP170B,CDH1,AP1M2,TRIM47,CLDN9,CTTN,PRSS22,JAG2,ZNF185,SSH3,LSR,CDC42BPG,RGL3,GRHL1,PLEKHG6,TFAP2A,TMEM265,CLDN7,MPP3,MARVELD2,DNAH14,GRHL2,SLC22A5,PLK2,LAD1,SPINT1,JUP,KDF1,PLEK2,ABHD11,WFDC3,GIPC1,ERBB3,PROM2,C1ORF115,LRP5,PPFIA1,DNTTI…
TF	Factor: ZNF37A; motif: CCYYGGCTCCNTSCCMN	TF:M12354	2.79529e-12	38.3801	11.5536	10489	1895	1266	18911	TSPAN15,KIAA1522,CTSV,LAMA5,KRT8,CELSR1,TUFT1,RIPK4,TMEM184A,KRT80,KRT18,RHPN2,SOX13,HSPA1A,WWC1,PPL,DDR1,CLDN4,BAIAP2,ADGRG1,MAL2,TLCD1,PLPP2,FAM83H,IGSF3,P2RY2,BCAM,PKP3,RAB5IF,PDGFB,RASEF,PRXL2A,CCNJL,SPR,ELF3,MYO5B,EPCAM,ARHGEF16,EPB41L1,PAK4,GRB7,PTPRF,PATJ,WNT7B,KRT15,MYH14,CYB561,PIGT,LAPTM4B,TFAP2C,LLGL2,B3GNT5,MAP7,VWA1,PON3,ETNK2,IQANK1,VAPB,TSPAN13,MET,SOWAHC,PCDH1,C19ORF33,MAP3K9,PMEP…
TF	Factor: SP1; motif: GGGGYGGGGNS; match class: 1	TF:M01303_1	2.8864e-12	38.3339	11.5396	3396	3524	831	18911	LAMA5,KRT8,CELSR1,KRT80,KRT18,EFNA1,RHPN2,HSPA1A,PPL,BAIAP2,TLCD1,PLPP2,PIP4K2C,FAM83H,IGSF3,P2RY2,BCAM,PKP3,EEF1A2,SDC4,ARHGEF16,GRB7,WFDC2,PTPRF,PATJ,CYB561,ANKEF1,CDS1,LLGL2,B3GNT5,ETNK2,IQANK1,KLC3,SOWAHC,LYPD3,CGN,MAP3K9,ESRP1,AGRN,CEP170B,DSG2,CTTN,BCAP31,RCE1,SDC1,WNT9A,JAG2,OVOL2,ZNF185,CLMN,PTPN3,SSH3,GPRC5C,CDC42BPG,CMTM4,SHB,SLC2A4RG,GRHL1,PPP1R26,RAP1GAP,PLEKHG6,MAB21L4,INHBB,MPP3,PKP…
GO:CC	vesicle	GO:0031982	2.91414e-12	38.3201	11.5355	3819	2776	768	18911	TSPAN15,CTSV,LAMA5,KRT8,TMEM184A,KRT18,BAIAP2L1,HSPA1A,HSPA1B,PPL,DDR1,BAIAP2,ADGRG1,MAL2,TOM1L1,PLPP2,PIP4K2C,BCAM,CHMP4C,PDGFB,SPR,MYO5B,EPCAM,SDC4,F11R,WFDC2,PTPRF,PATJ,WNT7B,KRT15,AIF1L,MYH14,CYB561,TSPAN6,PIGT,LAPTM4B,ITGB4,SCNN1A,VWA1,PON3,PMEPA1,KRT7,AGRN,SFN,YIPF6,CPVL,TMEM132A,TACSTD2,CDH1,AP1M2,DSG2,EPN3,BCAP31,SDC1,SYT12,FNBP1L,SLPI,ATP1B1,LSR,GPRC5C,TSPAN1,TGFA,MARVELD3,STON2,DSC2,STA…
TF	Factor: RNF96; motif: BCCCGCRGCC; match class: 1	TF:M01199_1	3.46783e-12	38.0691	11.4599	4194	3490	987	18911	KIAA1522,CTSV,LAMA5,CELSR1,BAIAP2L1,RHPN2,BAIAP2,MAL2,PLPP2,FAM83H,PKP3,PDGFB,MYO5B,EEF1A2,EPB41L1,PAK4,PTPRF,PATJ,CYB561,LAPTM4B,CDS1,LLGL2,B3GNT5,MAP7,ETNK2,IQANK1,VAPB,MAP3K9,ESRP2,AGRN,EFNA5,KIAA0895,ST6GALNAC2,PERP,CEP170B,CDH1,TMEM54,AP1M2,DSG2,TRIM47,PRSS22,RCE1,SDC1,C1ORF56,WNT9A,JAG2,TACC2,OVOL2,ATP1B1,CLMN,CDC42BPG,TJP1,CMTM4,GRAMD2A,SHB,DSC2,SLC2A4RG,GRHL1,PPP1R26,RAP1GAP,EPHX1,INHBB,W…
TF	Factor: CPBP; motif: GNNRGGGHGGGGNNGGGRN	TF:M09973	3.5348e-12	38.0415	11.4516	10410	3029	1944	18911	TSPAN15,KIAA1522,CTSV,LAMA5,KRT8,CELSR1,SHTN1,RIPK4,KRT80,KRT18,BAIAP2L1,EFNA1,RHPN2,HSPA1A,HSPA1B,WWC1,PPL,DDR1,CLDN4,BAIAP2,MAL2,TOM1L1,TLCD1,PLPP2,PIP4K2C,FAM83H,IGSF3,P2RY2,BCAM,PKP3,PLEKHG3,RAB5IF,PDGFB,RASEF,CCNJL,SPR,MYO5B,EEF1A2,EPCAM,SDC4,ARHGEF16,PAK4,GRB7,F11R,WFDC2,PTPRF,PATJ,TNFRSF21,WNT7B,KRT15,AIF1L,CYB561,TSPAN6,LAPTM4B,ANKEF1,SLC39A1,CDS1,LLGL2,FOXA1,B3GNT5,SCNN1A,MAP7,VWA1,ETNK2…
GO:CC	tight junction	GO:0070160	3.84949e-12	37.9185	11.4146	129	1760	47	18911	CLDN4,EPCAM,F11R,PATJ,CGN,CLDN9,CLDN1,LSR,TJP1,MARVELD3,CLDN7,MARVELD2,PARD6B,CLDN3,OCLN,EPPK1,PARD3,MICALL2,EPHA2,CXADR,CCDC85C,PRKCZ,CRB3,ECT2,AMOTL2,CLDN12,TJP3,EPB41L4B,ANK3,MAPK15,CLDN8,AFDN,CLDN23,RAB13,CLDN10,MAGI3,PRKCI,MPP7,MPP5,CGNL1,NPHP1,FZD5,SHROOM2,SAPCD2,CCND1,NHS,CDH5
GO:BP	epidermal cell differentiation	GO:0009913	4.46662e-12	37.704	11.35	276	1531	78	18911	CTSV,KRT8,KRT80,KRT18,PPL,PKP3,KRT15,ESRP1,KRT7,SFN,PERP,HES1,DSG2,JAG2,OVOL2,DSC2,GRHL1,KRT4,PLS1,PKP2,CDH3,KRT19,GRHL2,DSP,JUP,KDF1,IRF6,TRIM16,ERRFI1,EVPL,MCOLN3,SCEL,PRSS8,EPHA2,MYO6,SCRIB,KRT78,SULT2B1,FA2H,KLK5,ST14,TCHH,KRT86,KRT17,KRT6A,TMEM79,FOXC1,KLF4,OVOL1,CYP26B1,PI3,KRT83,YAP1,KRT81,KRT16,CTSL,PCSK6,SLC9A3R1,KRT23,AQP3,ETV4,CNFN,EXPH5,AKR1C3,SPINK5,KRT13,OPN3,JAG1,KRT5,IVL,FOSL2,SPR…
TF	Factor: WT1; motif: GNGGGGGCGGGG	TF:M03893	5.05212e-12	37.5262	11.2965	8009	3098	1567	18911	TSPAN15,KIAA1522,CTSV,KRT8,CELSR1,SHTN1,RIPK4,KRT18,BAIAP2L1,EFNA1,RHPN2,WWC1,PPL,FAM241B,BAIAP2,MAL2,TOM1L1,TLCD1,PLPP2,PIP4K2C,FAM83H,IGSF3,P2RY2,BCAM,PKP3,PDGFB,RASEF,CCNJL,MYO5B,EEF1A2,SDC4,ARHGEF16,NHLRC1,PAK4,GRB7,WFDC2,PTPRF,PATJ,WNT7B,AIF1L,MYH14,CYB561,PIGT,LAPTM4B,ANKEF1,TFAP2C,SLC39A1,CDS1,LLGL2,FOXA1,KIAA1671,B3GNT5,MAP7,VWA1,PON3,ETNK2,IQANK1,KLC3,VAPB,TSPAN13,MET,SOWAHC,PCDH1,C19ORF…
TF	Factor: TIEG1; motif: NCCCNSNCCCCGCCCCC	TF:M12351	5.61492e-12	37.3739	11.2507	11804	3277	2334	18911	TSPAN15,KIAA1522,CTSV,LAMA5,KRT8,CELSR1,TUFT1,SHTN1,RIPK4,TMEM184A,KRT80,KRT18,BAIAP2L1,EFNA1,RHPN2,SOX13,HSPA1A,HSPA1B,WWC1,PPL,DDR1,CLDN4,FAM241B,BAIAP2,ADGRG1,MAL2,TOM1L1,TLCD1,PLPP2,PIP4K2C,FAM83H,IGSF3,P2RY2,BCAM,PKP3,PLEKHG3,PDGFB,RASEF,PRXL2A,CCNJL,SPR,MYO5B,EEF1A2,EPCAM,SDC4,ARHGEF16,NHLRC1,PAK4,GRB7,F11R,WFDC2,PTPRF,PATJ,TNFRSF21,WNT7B,KRT15,AIF1L,MYH14,CYB561,PIGT,LAPTM4B,ANKEF1,TFAP2C,…
GO:BP	actin filament-based process	GO:0030029	6.05317e-12	37.2654	11.218	799	606	73	18911	KRT8,CELSR1,SHTN1,BAIAP2L1,BAIAP2,MYO5B,SDC4,EPB41L1,F11R,AIF1L,MYH14,LLGL2,MET,EFNA5,TACSTD2,DSG2,CTTN,FNBP1L,SSH3,CDC42BPG,TJP1,DSC2,SIX4,PLS1,WASL,PKP2,SPIRE2,KRT19,ID1,DSP,NCKAP1,JUP,PLEK2,SPTBN2,CLDN3,BCAR1,PPFIA1,COBL,SEMA3E,FGF12,LIMCH1,MICALL2,PXN,OBSL1,FHDC1,ARPC1A,CXADR,ARHGEF5,F2RL1,ARFGEF3,EMP2,CDC42EP4,MYO6,RHOD,SMIM22,SVIL,RAC1,CDC42BPB,TNNT1,ESPN,CARMIL1,RHOBTB3,ITGB5,PHLDB2,ECT2,S…
TF	Factor: WT1; motif: NGCGGGGGGGTSMMCYN	TF:M05327	6.6176e-12	37.1368	11.1793	5338	1638	625	18911	KIAA1522,LAMA5,KRT8,CELSR1,TUFT1,SHTN1,RIPK4,KRT18,BAIAP2L1,HSPA1A,MLF1,HSPA1B,WWC1,PPL,BAIAP2,TLCD1,PLPP2,FAM83H,PKP3,CHMP4C,RASEF,SPR,EEF1A2,PAK4,GRB7,PTPRF,PATJ,WNT7B,CYB561,LAPTM4B,ANKEF1,TFAP2C,LLGL2,FOXA1,SCNN1A,MAP7,ETNK2,IQANK1,MET,SOWAHC,CGN,MAP3K9,ESRP2,ESRP1,KRT7,AGRN,ST6GALNAC2,PERP,TMEM132A,CEP170B,HES1,TMEM30B,AP1M2,LAMB3,DSG2,CLDN9,CTTN,BCAP31,RTL8A,SYT12,FNBP1L,WNT9A,JAG2,TACC2,OV…
GO:CC	cell cortex	GO:0005938	7.27276e-12	37.0006	11.1383	314	653	46	18911	MYO5B,LLGL2,CDH1,CTTN,FNBP1L,CAPN2,PLS1,WASL,LAMC2,CTNND1,SPIRE2,KRT19,KDF1,BFSP1,PARD6B,GIPC1,MISP,SPTBN2,COBL,PARD3,PXN,MLPH,ASPH,MYO6,RHOD,RAC1,DST,SLC2A1,FAM110C,RHOBTB3,PCLO,PHLDB2,PRKCZ,ECT2,RTKN,DSTN,ARHGAP32,ANLN,MYZAP,ITCH,MARCKS,CNKSR1,RDX,TNFAIP2,PSEN2,RYR1
TF	Factor: Sp2; motif: GYCCCGCCYCYNNNN	TF:M07129	8.03434e-12	36.857	11.0951	6044	4344	1663	18911	TSPAN15,CTSV,LAMA5,KRT8,CELSR1,TUFT1,RIPK4,TMEM184A,KRT18,BAIAP2L1,RHPN2,WWC1,PPL,FAM241B,BAIAP2,MAL2,TLCD1,PLPP2,PIP4K2C,FAM83H,IGSF3,P2RY2,BCAM,PKP3,PLEKHG3,PDGFB,SPR,MYO5B,EEF1A2,SDC4,ARHGEF16,PAK4,GRB7,WFDC2,PTPRF,PATJ,MYH14,CYB561,TSPAN6,PIGT,LAPTM4B,ANKEF1,SLC39A1,CDS1,LLGL2,B3GNT5,VWA1,ETNK2,IQANK1,KLC3,VAPB,TSPAN13,SOWAHC,PCDH1,C19ORF33,LYPD3,CGN,MAP3K9,KRT7,AGRN,SFN,CEP170B,HES1,TACSTD2,…
TF	Factor: Sp1; motif: CCCCGCCCCN	TF:M00933	8.73653e-12	36.7361	11.0587	9344	2481	1464	18911	TSPAN15,KIAA1522,CTSV,LAMA5,KRT8,CELSR1,TUFT1,SHTN1,RIPK4,TMEM184A,KRT80,KRT18,BAIAP2L1,EFNA1,RHPN2,HSPA1B,WWC1,PPL,CLDN4,BAIAP2,MAL2,TOM1L1,TLCD1,PLPP2,PIP4K2C,FAM83H,IGSF3,P2RY2,BCAM,PKP3,CHMP4C,CCNJL,SPR,MYO5B,EEF1A2,EPCAM,SDC4,ARHGEF16,PAK4,GRB7,F11R,WFDC2,PTPRF,PATJ,TNFRSF21,WNT7B,KRT15,MYH14,CYB561,PIGT,LAPTM4B,ANKEF1,TFAP2C,SLC39A1,CDS1,LLGL2,FOXA1,B3GNT5,SCNN1A,MAP7,VWA1,ETNK2,IQANK1,KLC3…
TF	Factor: SP1; motif: NRGKGGGCGGGGCN	TF:M09765	8.77858e-12	36.7291	11.0566	7208	4474	2002	18911	TSPAN15,KIAA1522,CTSV,LAMA5,KRT8,CELSR1,TUFT1,SHTN1,RIPK4,TMEM184A,KRT18,BAIAP2L1,EFNA1,RHPN2,HSPA1B,WWC1,PPL,BAIAP2,MAL2,TOM1L1,TLCD1,PLPP2,PIP4K2C,FAM83H,IGSF3,P2RY2,BCAM,PKP3,CHMP4C,CCNJL,SPR,MYO5B,EEF1A2,SDC4,ARHGEF16,PAK4,GRB7,F11R,WFDC2,PTPRF,PATJ,AIF1L,MYH14,CYB561,PIGT,LAPTM4B,ANKEF1,TFAP2C,SLC39A1,CDS1,LLGL2,B3GNT5,SCNN1A,MAP7,VWA1,PON3,ETNK2,IQANK1,KLC3,VAPB,TSPAN13,MET,SOWAHC,PCDH1,C19…
GO:CC	endomembrane system	GO:0012505	9.65805e-12	36.5914	11.0151	4536	4972	1433	18911	TSPAN15,CTSV,TMEM184A,HSPA1A,HSPA1B,BAIAP2,MAL2,TOM1L1,PLPP2,CHMP4C,PDGFB,ELF3,MYO5B,SDC4,NHLRC1,PAK4,WNT7B,CYB561,PIGT,LAPTM4B,SLC39A1,ITGB4,CDS1,B3GNT5,SCNN1A,VWA1,VAPB,PMEPA1,AGRN,YIPF6,ST6GALNAC2,PERP,TMEM132A,CDH1,TMEM30B,AP1M2,EPN3,CTTN,BCAP31,RCE1,SDC1,SYT12,SLPI,CLMN,TGFA,GRAMD2A,STON2,HM13,STAU1,RAP1GAP,EPHX1,CAPN2,MUC1,VMP1,KLF5,KIFC3,DPM1,B3GNT3,ID1,GPAT3,LMNA,ALG1L,DSP,GCNT2,SYT7,SYS1…
TF	Factor: AP-2alpha; motif: GCCNNNRGS; match class: 1	TF:M00469_1	9.66358e-12	36.5906	11.0149	3225	2883	667	18911	CTSV,LAMA5,KRT8,CELSR1,KRT18,BAIAP2L1,BAIAP2,PLPP2,FAM83H,IGSF3,P2RY2,BCAM,CCNJL,MYO5B,EEF1A2,SDC4,ARHGEF16,PTPRF,PATJ,TNFRSF21,KRT15,MYH14,CYB561,FOXA1,IQANK1,SOWAHC,ESRP1,ACOT4,EFNA5,KIAA0895,ST6GALNAC2,CEP170B,TMEM30B,TMEM54,CLDN1,CTTN,BCAP31,RCE1,WNT9A,GET4,CLMN,PTPN3,SSH3,CDC42BPG,TJP1,GRAMD2A,SHB,STAU1,SLC2A4RG,GRHL1,PPP1R26,RAP1GAP,KRT4,EPHX1,MUC1,MPP3,TBC1D8,CDH3,SPIRE2,YTHDF1,DLG5,NANOS1…
TF	Factor: BTEB2; motif: RGGGNGKGGN	TF:M07277	1.04694e-11	36.475	10.9801	8173	3409	1746	18911	TSPAN15,KIAA1522,CTSV,LAMA5,KRT8,CELSR1,TUFT1,SHTN1,TMEM184A,KRT80,KRT18,BAIAP2L1,EFNA1,RHPN2,WWC1,PPL,BAIAP2,MAL2,TOM1L1,TLCD1,PLPP2,PIP4K2C,FAM83H,IGSF3,P2RY2,BCAM,PKP3,CHMP4C,PDGFB,RASEF,CCNJL,SPR,MYO5B,EEF1A2,EPCAM,SDC4,ARHGEF16,PAK4,GRB7,F11R,WFDC2,PTPRF,PATJ,TNFRSF21,WNT7B,AIF1L,MYH14,CYB561,PIGT,LAPTM4B,ANKEF1,TFAP2C,CDS1,LLGL2,FOXA1,B3GNT5,SCNN1A,VWA1,ETNK2,IQANK1,KLC3,VAPB,TSPAN13,SOWAHC…
TF	Factor: Egr-1; motif: GCGGGGGCGG; match class: 1	TF:M07354_1	1.21942e-11	36.255	10.9138	3465	3650	864	18911	TSPAN15,KIAA1522,LAMA5,CELSR1,RHPN2,WWC1,PPL,FAM241B,BAIAP2,MAL2,TLCD1,PLPP2,FAM83H,IGSF3,PDGFB,CCNJL,MYO5B,EEF1A2,SDC4,ARHGEF16,PAK4,WFDC2,PTPRF,PATJ,MYH14,CYB561,ANKEF1,LLGL2,B3GNT5,MAP7,VWA1,ETNK2,IQANK1,KLC3,SOWAHC,PCDH1,AGRN,CEP170B,CDH1,TMEM54,BCAP31,CARD10,WNT9A,JAG2,ATP1B1,CLMN,PTPN3,SSH3,LSR,GPRC5C,CDC42BPG,TJP1,CMTM4,SLC2A4RG,GRHL1,PPP1R26,RAP1GAP,REPS2,INHBB,MUC1,MPP3,PKP2,KLF5,G6PD,SP…
HPA	bronchus; respiratory epithelial cells[‚â•Low]	HPA:0060101	1.34538e-11	36.1132	10.8712	7062	2010	919	18911	TSPAN15,KIAA1522,KRT8,KRT18,BAIAP2L1,HSPA1A,HSPA1B,WWC1,PPL,DDR1,CLDN4,FAM241B,BAIAP2,TLCD1,PIP4K2C,FAM83H,PKP3,CHMP4C,PLEKHG3,PDGFB,RASEF,PRXL2A,CCNJL,ELF3,MYO5B,EPCAM,SDC4,ARHGEF16,EPB41L1,GRB7,F11R,WFDC2,PATJ,TNFRSF21,KRT15,MYH14,CYB561,TSPAN6,ITGB4,CDS1,FOXA1,KIAA1671,SCNN1A,MAP7,ETNK2,VAPB,MET,SOWAHC,PCDH1,CGN,MAP3K9,ESRP1,THRB,ACOT4,KRT7,AGRN,EFNA5,TMEM132A,CEP170B,TACSTD2,CDH1,LAMB3,S100A2…
HPA	bronchus	HPA:0060000	1.34538e-11	36.1132	10.8712	7062	2010	919	18911	TSPAN15,KIAA1522,KRT8,KRT18,BAIAP2L1,HSPA1A,HSPA1B,WWC1,PPL,DDR1,CLDN4,FAM241B,BAIAP2,TLCD1,PIP4K2C,FAM83H,PKP3,CHMP4C,PLEKHG3,PDGFB,RASEF,PRXL2A,CCNJL,ELF3,MYO5B,EPCAM,SDC4,ARHGEF16,EPB41L1,GRB7,F11R,WFDC2,PATJ,TNFRSF21,KRT15,MYH14,CYB561,TSPAN6,ITGB4,CDS1,FOXA1,KIAA1671,SCNN1A,MAP7,ETNK2,VAPB,MET,SOWAHC,PCDH1,CGN,MAP3K9,ESRP1,THRB,ACOT4,KRT7,AGRN,EFNA5,TMEM132A,CEP170B,TACSTD2,CDH1,LAMB3,S100A2…
TF	Factor: GKLF; motif: NNRRGRRNGNSNNN; match class: 1	TF:M07040_1	1.60351e-11	35.86	10.7949	7838	3507	1728	18911	TSPAN15,KIAA1522,CTSV,LAMA5,SHTN1,RIPK4,TMEM184A,KRT80,BAIAP2L1,EFNA1,RHPN2,MLF1,WWC1,CLDN4,BAIAP2,ADGRG1,MAL2,TLCD1,PLPP2,FAM83H,IGSF3,P2RY2,BCAM,PKP3,PLEKHG3,RAB5IF,PDGFB,RASEF,PRXL2A,CCNJL,ELF3,MYO5B,EEF1A2,EPCAM,SDC4,ARHGEF16,PAK4,GRB7,F11R,WFDC2,PTPRF,PATJ,TNFRSF21,KRT15,AIF1L,MYH14,TSPAN6,LAPTM4B,SLC39A1,LLGL2,FOXA1,KIAA1671,SCNN1A,VWA1,ETNK2,IQANK1,KLC3,TSPAN13,MET,PCDH1,MAP3K9,ESRP2,ESRP1…
TF	Factor: AP2; motif: GCCYGSGGSN	TF:M08867	1.85799e-11	35.6475	10.731	9650	3234	1928	18911	TSPAN15,KIAA1522,CTSV,LAMA5,KRT8,CELSR1,SHTN1,RIPK4,TMEM184A,KRT80,KRT18,BAIAP2L1,EFNA1,RHPN2,WWC1,MAP3K13,CLDN4,FAM241B,BAIAP2,ADGRG1,MAL2,PLPP2,FAM83H,IGSF3,P2RY2,BCAM,RAB5IF,PDGFB,CCNJL,SPR,ELF3,MYO5B,EEF1A2,EPCAM,SDC4,ARHGEF16,NHLRC1,EPB41L1,PAK4,GRB7,PTPRF,PATJ,TNFRSF21,WNT7B,KRT15,TSKU,MYH14,ARHGAP39,CYB561,TSPAN6,PIGT,LAPTM4B,TFAP2C,ITGB4,CDS1,LLGL2,FOXA1,B3GNT5,SCNN1A,MAP7,ETNK2,IQANK1,KL…
TF	Factor: SP2; motif: GGGCGGGAC	TF:M01783	1.98862e-11	35.5494	10.7014	8786	2763	1533	18911	TSPAN15,KIAA1522,CTSV,LAMA5,KRT8,CELSR1,TUFT1,SHTN1,RIPK4,TMEM184A,KRT80,KRT18,BAIAP2L1,EFNA1,RHPN2,HSPA1A,HSPA1B,DDX27,WWC1,PPL,BAIAP2,MAL2,TOM1L1,TLCD1,PLPP2,PIP4K2C,FAM83H,IGSF3,P2RY2,BCAM,PKP3,CHMP4C,PDGFB,RASEF,PRXL2A,CCNJL,SPR,ELF3,MYO5B,EEF1A2,EPCAM,SDC4,ARHGEF16,PAK4,GRB7,F11R,WFDC2,PTPRF,PATJ,WNT7B,KRT15,MYH14,CYB561,PIGT,LAPTM4B,TFAP2C,ITGB4,CDS1,LLGL2,B3GNT5,MAP7,VWA1,PON3,ETNK2,IQANK1…
TF	Factor: MAZ; motif: GGGGGAGGGGGNGRGRRRGNRG; match class: 1	TF:M09984_1	2.13901e-11	35.4443	10.6698	5348	3512	1231	18911	KIAA1522,LAMA5,KRT8,KRT18,BAIAP2L1,EFNA1,RHPN2,HSPA1A,WWC1,BAIAP2,ADGRG1,TLCD1,PLPP2,IGSF3,BCAM,MYO5B,EEF1A2,ARHGEF16,PAK4,GRB7,WFDC2,PTPRF,PATJ,AIF1L,ARHGAP39,CYB561,ANKEF1,CDS1,FOXA1,KIAA1671,B3GNT5,SCNN1A,ETNK2,IQANK1,SOWAHC,PCDH1,C19ORF33,MAP3K9,ESRP2,ESRP1,KRT7,AGRN,ST6GALNAC2,TMEM132A,CEP170B,HES1,TMEM54,LAMB3,DSG2,CLDN9,CTTN,BCAP31,PRSS22,SDC1,SYT12,FNBP1L,SLC25A13,CARD10,WNT9A,JAG2,OVOL2,…
TF	Factor: HIC1; motif: NNNGGKTGCCCSNNNNNN	TF:M01073	2.30366e-11	35.3373	10.6376	3935	2649	735	18911	LAMA5,KRT8,KRT80,KRT18,BAIAP2L1,WWC1,ADGRG1,PLPP2,FAM83H,PKP3,PLEKHG3,RASEF,CCNJL,SPR,ELF3,MYO5B,EEF1A2,NHLRC1,PAK4,GRB7,TNFRSF21,WNT7B,ARHGAP39,TFAP2C,LLGL2,KIAA1671,SCNN1A,VWA1,PON3,ETNK2,IQANK1,KLC3,MET,PCDH1,C19ORF33,MAP3K9,ESRP1,ACOT4,EFNA5,TMEM132A,S100A2,EPN3,CLDN1,BCAP31,RCE1,SLC25A13,CARD10,C6ORF141,JAG2,TACC2,GET4,ABCC3,LSR,TMPRSS13,GPRC5C,CDC42BPG,PRPF6,TGFA,RGL3,SIX4,STAU1,SLC2A4RG,GR…
TF	Factor: KLF15; motif: NCCMCGCCCMCN; match class: 1	TF:M12158_1	2.56393e-11	35.1829	10.5911	5777	2819	1081	18911	LAMA5,CELSR1,RIPK4,BAIAP2L1,EFNA1,RHPN2,HSPA1A,WWC1,PPL,DDR1,FAM241B,BAIAP2,TLCD1,PLPP2,PIP4K2C,FAM83H,P2RY2,BCAM,PKP3,EEF1A2,ARHGEF16,PAK4,GRB7,F11R,PTPRF,PATJ,KRT15,MYH14,TSPAN6,ANKEF1,CDS1,LLGL2,FOXA1,B3GNT5,VWA1,ETNK2,IQANK1,KLC3,TSPAN13,MET,SOWAHC,PCDH1,MAP3K9,AGRN,ST6GALNAC2,CEP170B,HES1,TACSTD2,CDH1,TMEM54,TRIM47,CTTN,BCAP31,RCE1,SDC1,CARD10,WNT9A,C6ORF141,JAG2,OVOL2,STYK1,CLMN,PTPN3,GPRC5…
GO:BP	actin cytoskeleton organization	GO:0030036	3.59936e-11	34.6935	10.4438	701	606	66	18911	KRT8,CELSR1,SHTN1,BAIAP2L1,BAIAP2,MYO5B,SDC4,EPB41L1,F11R,AIF1L,MYH14,LLGL2,MET,EFNA5,TACSTD2,CTTN,SSH3,CDC42BPG,TJP1,SIX4,PLS1,WASL,SPIRE2,KRT19,ID1,NCKAP1,PLEK2,SPTBN2,CLDN3,BCAR1,PPFIA1,COBL,SEMA3E,LIMCH1,MICALL2,PXN,OBSL1,FHDC1,ARPC1A,CXADR,ARHGEF5,F2RL1,ARFGEF3,EMP2,CDC42EP4,MYO6,RHOD,SMIM22,SVIL,RAC1,CDC42BPB,TNNT1,ESPN,CARMIL1,RHOBTB3,ITGB5,PHLDB2,ECT2,S100A10,RTKN,DSTN,MYO5C,ANLN,AMOTL2,P…
TF	Factor: MAZ; motif: GGGMGGGGS; match class: 1	TF:M10432_1	3.74764e-11	34.6352	10.4262	4221	2860	830	18911	TSPAN15,KIAA1522,LAMA5,KRT8,CELSR1,KRT80,KRT18,BAIAP2L1,RHPN2,WWC1,CLDN4,FAM241B,BAIAP2,TLCD1,PLPP2,FAM83H,IGSF3,CCNJL,EEF1A2,SDC4,ARHGEF16,GRB7,PTPRF,PATJ,AIF1L,CYB561,SLC39A1,LLGL2,FOXA1,B3GNT5,SCNN1A,MAP7,VWA1,ETNK2,IQANK1,KLC3,SOWAHC,PCDH1,MAP3K9,ESRP1,KRT7,AGRN,CEP170B,HES1,CDH1,TMEM54,LAMB3,CLDN9,BCAP31,PRSS22,SYT12,FNBP1L,SLC25A13,WNT9A,OVOL2,ATP1B1,CLMN,PTPN3,GPRC5C,CDC42BPG,PRPF6,TJP1,ZN…
TF	Factor: Churchill; motif: CGGGNN; match class: 1	TF:M00986_1	4.2156e-11	34.4655	10.3751	9982	3547	2155	18911	KIAA1522,CTSV,LAMA5,KRT8,CELSR1,TUFT1,SHTN1,RIPK4,TMEM184A,KRT80,KRT18,BAIAP2L1,EFNA1,RHPN2,HSPA1A,WWC1,PPL,CLDN4,FAM241B,BAIAP2,MAL2,TLCD1,PLPP2,PIP4K2C,FAM83H,IGSF3,BCAM,PKP3,PLEKHG3,PDGFB,RASEF,CCNJL,SPR,MYO5B,EEF1A2,EPCAM,SDC4,ARHGEF16,PAK4,WFDC2,PTPRF,PATJ,TNFRSF21,WNT7B,MYH14,CYB561,LAPTM4B,ANKEF1,TFAP2C,CDS1,LLGL2,FOXA1,KIAA1671,B3GNT5,MAP7,VWA1,ETNK2,IQANK1,KLC3,VAPB,TSPAN13,MET,SOWAHC,PC…
TF	Factor: Sp1; motif: CCCCGCCCCN; match class: 1	TF:M00933_1	4.25331e-11	34.4526	10.3713	4998	2847	956	18911	LAMA5,KRT8,CELSR1,TUFT1,SHTN1,KRT18,BAIAP2L1,EFNA1,RHPN2,BAIAP2,TOM1L1,TLCD1,PLPP2,PIP4K2C,FAM83H,IGSF3,P2RY2,BCAM,PKP3,CCNJL,EEF1A2,EPCAM,SDC4,ARHGEF16,GRB7,F11R,WFDC2,PATJ,MYH14,CYB561,ANKEF1,SLC39A1,CDS1,LLGL2,FOXA1,B3GNT5,ETNK2,IQANK1,KLC3,VAPB,TSPAN13,SOWAHC,PCDH1,LYPD3,CGN,MAP3K9,ESRP2,ESRP1,KRT7,AGRN,CEP170B,HES1,DSG2,CTTN,BCAP31,PRSS22,RCE1,SDC1,FNBP1L,WNT9A,JAG2,OVOL2,ATP1B1,CLMN,PTPN3,S…
TF	Factor: Egr-1; motif: GCGGGGGCGG	TF:M01873	4.3771e-11	34.4112	10.3588	6499	3334	1390	18911	TSPAN15,KIAA1522,CTSV,KRT8,CELSR1,SHTN1,KRT18,EFNA1,RHPN2,WWC1,PPL,FAM241B,BAIAP2,MAL2,TOM1L1,TLCD1,PLPP2,FAM83H,IGSF3,PDGFB,RASEF,CCNJL,MYO5B,EEF1A2,EPCAM,SDC4,ARHGEF16,PAK4,GRB7,PTPRF,PATJ,TNFRSF21,WNT7B,AIF1L,MYH14,CYB561,LAPTM4B,ANKEF1,TFAP2C,SLC39A1,CDS1,LLGL2,KIAA1671,B3GNT5,MAP7,VWA1,ETNK2,IQANK1,KLC3,TSPAN13,SOWAHC,PCDH1,C19ORF33,ESRP2,STARD10,ACOT4,AGRN,EFNA5,KIAA0895,ST6GALNAC2,CEP170B,…
TF	Factor: ZNF614; motif: NCYCWGCCYYNNN	TF:M09862	4.40007e-11	34.4037	10.3565	8962	2034	1177	18911	KIAA1522,CTSV,KRT8,CELSR1,SHTN1,TMEM184A,KRT80,KRT18,BAIAP2L1,EFNA1,WWC1,PPL,DDR1,BAIAP2,MAL2,TLCD1,PLPP2,PIP4K2C,FAM83H,P2RY2,BCAM,PKP3,PLEKHG3,PDGFB,PRXL2A,CCNJL,SPR,EEF1A2,EPCAM,SDC4,ARHGEF16,EPB41L1,PAK4,GRB7,F11R,PTPRF,PATJ,TNFRSF21,WNT7B,AIF1L,CYB561,LAPTM4B,ANKEF1,TFAP2C,SLC39A1,CDS1,LLGL2,B3GNT5,SCNN1A,VWA1,ETNK2,IQANK1,KLC3,TSPAN13,MET,SOWAHC,PCDH1,C19ORF33,LYPD3,CGN,MAP3K9,PMEPA1,AGRN,T…
REAC	Cell-cell junction organization	REAC:R-HSA-421270	4.45944e-11	34.3843	10.3507	64	527	18	18911	CLDN4,F11R,PATJ,CDH1,CLDN9,CLDN1,CLDN7,CTNND1,CDH3,JUP,PARD6B,CLDN3,NECTIN4,PARD3,PVR,CTNNA1,NECTIN2,CRB3
TF	Factor: sp4; motif: NNNGCYCCGCCCCCY	TF:M10530	5.39332e-11	34.11	10.2681	7917	3395	1686	18911	TSPAN15,KIAA1522,CTSV,LAMA5,KRT8,CELSR1,TUFT1,SHTN1,RIPK4,TMEM184A,KRT80,KRT18,BAIAP2L1,RHPN2,DDX27,WWC1,PPL,MAP3K13,DDR1,FAM241B,BAIAP2,MAL2,TLCD1,PLPP2,PIP4K2C,FAM83H,IGSF3,P2RY2,BCAM,PKP3,CHMP4C,PDGFB,RASEF,CCNJL,SPR,MYO5B,EEF1A2,EPCAM,SDC4,ARHGEF16,NHLRC1,PAK4,GRB7,F11R,WFDC2,PTPRF,PATJ,MYH14,CYB561,PIGT,LAPTM4B,ANKEF1,TFAP2C,CDS1,LLGL2,B3GNT5,SCNN1A,VWA1,ETNK2,IQANK1,KLC3,VAPB,TSPAN13,SOWAHC…
GO:CC	bicellular tight junction	GO:0005923	5.9438e-11	33.9698	10.2259	122	1843	45	18911	CLDN4,EPCAM,F11R,PATJ,CGN,CLDN9,CLDN1,TJP1,MARVELD3,CLDN7,MARVELD2,PARD6B,CLDN3,OCLN,EPPK1,PARD3,MICALL2,CXADR,CCDC85C,PRKCZ,CRB3,ECT2,AMOTL2,CLDN12,TJP3,EPB41L4B,ANK3,MAPK15,CLDN8,CLDN23,RAB13,CLDN10,MAGI3,PRKCI,MPP7,MPP5,CGNL1,NPHP1,FZD5,SHROOM2,SAPCD2,CCND1,NHS,CDH5,TJP2
HPA	esophagus	HPA:0190000	6.17217e-11	33.9154	10.2096	6356	2010	836	18911	TSPAN15,KIAA1522,TUFT1,RIPK4,BAIAP2L1,HSPA1A,HSPA1B,WWC1,PPL,DDR1,CLDN4,FAM241B,BAIAP2,TLCD1,PIP4K2C,FAM83H,IGSF3,PKP3,CHMP4C,PLEKHG3,PDGFB,RASEF,PRXL2A,CCNJL,MYO5B,EEF1A2,SDC4,ARHGEF16,EPB41L1,GRB7,F11R,PATJ,TNFRSF21,KRT15,TSKU,MYH14,CYB561,TSPAN6,ANKEF1,TFAP2C,FOXA1,KIAA1671,SCNN1A,MAP7,ETNK2,KLC3,VAPB,MET,SOWAHC,PCDH1,LYPD3,CGN,ESRP1,KRT7,AGRN,SFN,TMEM132A,CEP170B,TACSTD2,CDH1,LAMB3,S100A2,DSG…
HPA	esophagus; squamous epithelial cells[‚â•Low]	HPA:0190221	6.17217e-11	33.9154	10.2096	6356	2010	836	18911	TSPAN15,KIAA1522,TUFT1,RIPK4,BAIAP2L1,HSPA1A,HSPA1B,WWC1,PPL,DDR1,CLDN4,FAM241B,BAIAP2,TLCD1,PIP4K2C,FAM83H,IGSF3,PKP3,CHMP4C,PLEKHG3,PDGFB,RASEF,PRXL2A,CCNJL,MYO5B,EEF1A2,SDC4,ARHGEF16,EPB41L1,GRB7,F11R,PATJ,TNFRSF21,KRT15,TSKU,MYH14,CYB561,TSPAN6,ANKEF1,TFAP2C,FOXA1,KIAA1671,SCNN1A,MAP7,ETNK2,KLC3,VAPB,MET,SOWAHC,PCDH1,LYPD3,CGN,ESRP1,KRT7,AGRN,SFN,TMEM132A,CEP170B,TACSTD2,CDH1,LAMB3,S100A2,DSG…
TF	Factor: AP-2; motif: GSCCSCRGGCNRNRNN	TF:M00800	6.40633e-11	33.8617	10.1934	8761	2132	1201	18911	KIAA1522,LAMA5,KRT8,CELSR1,TUFT1,SHTN1,RIPK4,TMEM184A,KRT80,KRT18,BAIAP2L1,EFNA1,RHPN2,SOX13,DDX27,PPL,MAP3K13,FAM241B,BAIAP2,ADGRG1,MAL2,PLPP2,FAM83H,IGSF3,BCAM,PKP3,CHMP4C,PLEKHG3,RAB5IF,PDGFB,PRXL2A,CCNJL,SPR,ELF3,MYO5B,EEF1A2,EPCAM,SDC4,ARHGEF16,F11R,PTPRF,PATJ,TNFRSF21,WNT7B,KRT15,AIF1L,MYH14,ARHGAP39,CYB561,LAPTM4B,TFAP2C,SLC39A1,ITGB4,LLGL2,FOXA1,KIAA1671,B3GNT5,MAP7,ETNK2,IQANK1,VAPB,TSPA…
TF	Factor: EGR; motif: CGCCCCCGCNN; match class: 1	TF:M08878_1	6.61373e-11	33.8157	10.1796	3119	4827	1005	18911	TSPAN15,KIAA1522,RHPN2,WWC1,PPL,FAM241B,BAIAP2,TLCD1,PLPP2,FAM83H,IGSF3,PDGFB,CCNJL,MYO5B,EEF1A2,SDC4,ARHGEF16,PAK4,PTPRF,PATJ,CYB561,ANKEF1,LLGL2,B3GNT5,VWA1,ETNK2,IQANK1,SOWAHC,PCDH1,MAP3K9,AGRN,CEP170B,CDH1,BCAP31,SDC1,JAG2,ATP1B1,CLMN,PTPN3,LSR,GPRC5C,CDC42BPG,TJP1,CMTM4,SLC2A4RG,GRHL1,PPP1R26,RAP1GAP,REPS2,INHBB,MUC1,PKP2,KLF5,DNAH14,G6PD,NANOS1,DSP,NCKAP1,SPINT1,PARD6B,PANX2,ABHD11,TMEM40,N…
TF	Factor: BTEB3; motif: BNRNGGGAGGNGT	TF:M01865	7.65192e-11	33.6054	10.1162	9440	3006	1772	18911	KIAA1522,CTSV,LAMA5,TMEM184A,KRT80,BAIAP2L1,RHPN2,HSPA1A,MLF1,HSPA1B,WWC1,MAP3K13,DDR1,CLDN4,FAM241B,BAIAP2,ADGRG1,MAL2,TOM1L1,TLCD1,PLPP2,IGSF3,P2RY2,BCAM,PKP3,PLEKHG3,RAB5IF,CCNJL,ELF3,MYO5B,EEF1A2,EPCAM,ARHGEF16,NHLRC1,PAK4,GRB7,F11R,WFDC2,PTPRF,PATJ,WNT7B,AIF1L,MYH14,CYB561,TFAP2C,SLC39A1,CDS1,LLGL2,FOXA1,KIAA1671,SCNN1A,ETNK2,IQANK1,KLC3,MET,PCDH1,C19ORF33,ESRP1,KRT7,AGRN,EFNA5,KIAA0895,TMEM…
TF	Factor: sp4; motif: NNNGCYCCGCCCCCY; match class: 1	TF:M10530_1	7.88957e-11	33.5613	10.1029	3657	2870	734	18911	LAMA5,KRT8,CELSR1,TUFT1,KRT18,BAIAP2L1,RHPN2,DDR1,BAIAP2,PIP4K2C,FAM83H,IGSF3,BCAM,PKP3,RASEF,SPR,EEF1A2,EPCAM,ARHGEF16,PAK4,GRB7,PATJ,MYH14,ANKEF1,TFAP2C,CDS1,LLGL2,B3GNT5,ETNK2,IQANK1,KLC3,TSPAN13,SOWAHC,LYPD3,CGN,MAP3K9,AGRN,CEP170B,CTTN,BCAP31,RCE1,SDC1,CARD10,JAG2,ATP1B1,CLMN,PRPF6,TJP1,CMTM4,SHB,RGL3,STAU1,SLC2A4RG,GRHL1,PPP1R26,RAP1GAP,REPS2,PLEKHG6,INHBB,MUC1,MPP3,PKP2,KLF5,MARVELD2,CITED…
TF	Factor: Sp2; motif: TGGGCGCGCCCA; match class: 1	TF:M06948_1	1.22883e-10	32.922	9.91051	5977	3291	1274	18911	TSPAN15,CTSV,LAMA5,CELSR1,TUFT1,SHTN1,RIPK4,BAIAP2L1,RHPN2,SOX13,WWC1,PPL,FAM241B,BAIAP2,ADGRG1,MAL2,TLCD1,PLPP2,FAM83H,PDGFB,RASEF,CCNJL,SPR,MYO5B,EEF1A2,EPCAM,SDC4,ARHGEF16,WFDC2,PTPRF,WNT7B,LAPTM4B,LLGL2,B3GNT5,MAP7,VWA1,ETNK2,IQANK1,MET,SOWAHC,PCDH1,C19ORF33,PMEPA1,ESRP2,STARD10,ACOT4,AGRN,KIAA0895,CPVL,CEP170B,TACSTD2,CDH1,TRIM47,CLDN1,BCAP31,PRSS22,CARD10,WNT9A,JAG2,TACC2,ATP1B1,ABCC3,PTPN3…
TF	Factor: EGR1; motif: NCNCCGCCCCCGCN; match class: 1	TF:M07208_1	1.23628e-10	32.9133	9.90788	2121	3384	530	18911	TSPAN15,KIAA1522,KRT8,KRT18,BAIAP2L1,RHPN2,PPL,BAIAP2,PLPP2,EEF1A2,ARHGEF16,PATJ,CYB561,ANKEF1,SLC39A1,FOXA1,ETNK2,PCDH1,AGRN,ST6GALNAC2,CEP170B,FNBP1L,CARD10,JAG2,OVOL2,ATP1B1,CLMN,PTPN3,CDC42BPG,TJP1,STAU1,GRHL1,RAP1GAP,REPS2,INHBB,MUC1,MPP3,PKP2,G6PD,CTNND1,UPP1,DSP,NCKAP1,KDF1,PARD6B,CACNG4,PANX2,TMEM40,PLEKHA7,MCOLN3,PCSK1N,PPFIA1,HID1,IL13RA1,SYT17,MRGBP,PLEKHA6,LTBP3,PARD3,SERTAD4,LRRC1,MI…
HPA	colon	HPA:0130000	1.25531e-10	32.8912	9.90125	7757	2010	989	18911	TSPAN15,KIAA1522,KRT8,TUFT1,KRT18,BAIAP2L1,HSPA1A,HSPA1B,WWC1,DDR1,CLDN4,FAM241B,BAIAP2,TLCD1,PIP4K2C,FAM83H,CHMP4C,PLEKHG3,PDGFB,RASEF,PRXL2A,CCNJL,ELF3,MYO5B,EPCAM,SDC4,ARHGEF16,EPB41L1,GRB7,F11R,WFDC2,PATJ,TNFRSF21,KRT15,TSKU,AIF1L,MYH14,CYB561,TSPAN6,ANKEF1,ITGB4,CDS1,FOXA1,KIAA1671,SCNN1A,MAP7,ETNK2,KLC3,VAPB,MET,SOWAHC,PCDH1,CGN,MAP3K9,ITGB6,ESRP1,THRB,ACOT4,AGRN,EFNA5,TMEM132A,CEP170B,CDH1…
GO:CC	apical part of cell	GO:0045177	1.27011e-10	32.8743	9.89616	439	4925	191	18911	CTSV,CLDN4,MAL2,MYO5B,EPCAM,PATJ,SCNN1A,DSG2,CLDN1,ATP1B1,TJP1,MUC1,MARVELD2,SLC22A5,PARD6B,SPTBN2,ERBB3,PROM2,OCLN,EGFR,PARD3,STX3,EMP2,MYO6,SLC2A1,SLC4A11,PRKCZ,APP,CRB3,FOLR1,SHANK2,AMOTL2,SLC9A3R2,UPK2,CETN2,ERBB2,RDX,KCNK1,PSEN2,SLC52A3,SLC46A1,ATP6V1B1,EPB41L4B,CD9,PTK2,ANO1,RAB17,GPR143,AFDN,MGST1,FZD6,PTPRH,P2RY6,UPK1B,RAB27B,PLD1,CTSL,SLC9A3R1,MUC20,SLC15A1,PRKCI,OSMR,MPP5,CEACAM6,SLC5A1…
HPA	stomach 2; glandular cells[‚â•Low]	HPA:0550051	1.30755e-10	32.8324	9.88354	7247	2010	933	18911	TSPAN15,KIAA1522,KRT8,TUFT1,RIPK4,KRT18,BAIAP2L1,HSPA1A,HSPA1B,WWC1,PPL,DDR1,CLDN4,FAM241B,BAIAP2,TLCD1,PIP4K2C,FAM83H,CHMP4C,PLEKHG3,PDGFB,RASEF,PRXL2A,CCNJL,ELF3,MYO5B,SDC4,ARHGEF16,EPB41L1,GRB7,F11R,PATJ,TNFRSF21,TSKU,MYH14,CYB561,TSPAN6,ANKEF1,ITGB4,CDS1,FOXA1,KIAA1671,SCNN1A,MAP7,ETNK2,VAPB,MET,SOWAHC,PCDH1,CGN,MAP3K9,ITGB6,ESRP1,THRB,KRT7,AGRN,EFNA5,TMEM132A,CEP170B,CDH1,LAMB3,DSG2,EPN3,CLD…
HPA	stomach 2	HPA:0550000	1.30755e-10	32.8324	9.88354	7247	2010	933	18911	TSPAN15,KIAA1522,KRT8,TUFT1,RIPK4,KRT18,BAIAP2L1,HSPA1A,HSPA1B,WWC1,PPL,DDR1,CLDN4,FAM241B,BAIAP2,TLCD1,PIP4K2C,FAM83H,CHMP4C,PLEKHG3,PDGFB,RASEF,PRXL2A,CCNJL,ELF3,MYO5B,SDC4,ARHGEF16,EPB41L1,GRB7,F11R,PATJ,TNFRSF21,TSKU,MYH14,CYB561,TSPAN6,ANKEF1,ITGB4,CDS1,FOXA1,KIAA1671,SCNN1A,MAP7,ETNK2,VAPB,MET,SOWAHC,PCDH1,CGN,MAP3K9,ITGB6,ESRP1,THRB,KRT7,AGRN,EFNA5,TMEM132A,CEP170B,CDH1,LAMB3,DSG2,EPN3,CLD…
HPA	nasopharynx; respiratory epithelial cells[‚â•Low]	HPA:0320101	1.33396e-10	32.8036	9.87486	6855	1111	523	18911	TSPAN15,KIAA1522,KRT8,TUFT1,KRT18,BAIAP2L1,HSPA1A,HSPA1B,WWC1,PPL,DDR1,FAM241B,BAIAP2,TLCD1,PIP4K2C,FAM83H,PKP3,CHMP4C,PDGFB,RASEF,PRXL2A,CCNJL,ELF3,MYO5B,EPCAM,SDC4,ARHGEF16,EPB41L1,GRB7,F11R,WFDC2,PATJ,TNFRSF21,TSKU,MYH14,CYB561,TSPAN6,ANKEF1,ITGB4,CDS1,FOXA1,KIAA1671,SCNN1A,MAP7,ETNK2,VAPB,MET,SOWAHC,PCDH1,CGN,MAP3K9,ITGB6,ESRP1,ACOT4,KRT7,AGRN,EFNA5,TMEM132A,CEP170B,TACSTD2,CDH1,LAMB3,S100A2,…
HPA	nasopharynx	HPA:0320000	1.33396e-10	32.8036	9.87486	6855	1111	523	18911	TSPAN15,KIAA1522,KRT8,TUFT1,KRT18,BAIAP2L1,HSPA1A,HSPA1B,WWC1,PPL,DDR1,FAM241B,BAIAP2,TLCD1,PIP4K2C,FAM83H,PKP3,CHMP4C,PDGFB,RASEF,PRXL2A,CCNJL,ELF3,MYO5B,EPCAM,SDC4,ARHGEF16,EPB41L1,GRB7,F11R,WFDC2,PATJ,TNFRSF21,TSKU,MYH14,CYB561,TSPAN6,ANKEF1,ITGB4,CDS1,FOXA1,KIAA1671,SCNN1A,MAP7,ETNK2,VAPB,MET,SOWAHC,PCDH1,CGN,MAP3K9,ITGB6,ESRP1,ACOT4,KRT7,AGRN,EFNA5,TMEM132A,CEP170B,TACSTD2,CDH1,LAMB3,S100A2,…
HPA	urinary bladder	HPA:0610000	1.378e-10	32.7567	9.86075	6956	2010	901	18911	TSPAN15,KIAA1522,KRT8,TUFT1,KRT18,BAIAP2L1,HSPA1A,HSPA1B,WWC1,PPL,DDR1,CLDN4,BAIAP2,TLCD1,PIP4K2C,FAM83H,PKP3,CHMP4C,PLEKHG3,PDGFB,RASEF,PRXL2A,CCNJL,ELF3,MYO5B,SDC4,ARHGEF16,EPB41L1,GRB7,F11R,PATJ,TNFRSF21,TSKU,MYH14,TSPAN6,ANKEF1,ITGB4,CDS1,FOXA1,KIAA1671,SCNN1A,MAP7,ETNK2,VAPB,MET,SOWAHC,PCDH1,CGN,MAP3K9,ITGB6,ESRP1,KRT7,AGRN,EFNA5,CEP170B,TACSTD2,CDH1,LAMB3,S100A2,DSG2,EPN3,CLDN1,CTTN,BCAP31,…
HPA	urinary bladder; urothelial cells[‚â•Low]	HPA:0610831	1.378e-10	32.7567	9.86075	6956	2010	901	18911	TSPAN15,KIAA1522,KRT8,TUFT1,KRT18,BAIAP2L1,HSPA1A,HSPA1B,WWC1,PPL,DDR1,CLDN4,BAIAP2,TLCD1,PIP4K2C,FAM83H,PKP3,CHMP4C,PLEKHG3,PDGFB,RASEF,PRXL2A,CCNJL,ELF3,MYO5B,SDC4,ARHGEF16,EPB41L1,GRB7,F11R,PATJ,TNFRSF21,TSKU,MYH14,TSPAN6,ANKEF1,ITGB4,CDS1,FOXA1,KIAA1671,SCNN1A,MAP7,ETNK2,VAPB,MET,SOWAHC,PCDH1,CGN,MAP3K9,ITGB6,ESRP1,KRT7,AGRN,EFNA5,CEP170B,TACSTD2,CDH1,LAMB3,S100A2,DSG2,EPN3,CLDN1,CTTN,BCAP31,…
TF	Factor: Sp1; motif: GGNDGGRGGCGGGG; match class: 1	TF:M04953_1	1.39295e-10	32.7411	9.85606	3917	3394	903	18911	KIAA1522,LAMA5,KRT8,CELSR1,KRT80,KRT18,BAIAP2L1,EFNA1,SOX13,WWC1,PPL,DDR1,CLDN4,BAIAP2,TOM1L1,PLPP2,FAM83H,IGSF3,P2RY2,BCAM,PKP3,PDGFB,CCNJL,EEF1A2,EPCAM,ARHGEF16,PAK4,GRB7,PTPRF,PATJ,MYH14,ANKEF1,CDS1,FOXA1,SCNN1A,ETNK2,IQANK1,TSPAN13,SOWAHC,PCDH1,C19ORF33,MAP3K9,ESRP1,KRT7,AGRN,ST6GALNAC2,CEP170B,HES1,TMEM54,CTTN,BCAP31,SDC1,FNBP1L,C1ORF56,JAG2,OVOL2,ABCC3,PTPN3,GPRC5C,CDC42BPG,PRPF6,TJP1,SHB,S…
TF	Factor: TCF-1; motif: ACATCGRGRCGCTGW; match class: 1	TF:M11603_1	1.41356e-10	32.72	9.84969	12604	2873	2178	18911	TSPAN15,KIAA1522,CTSV,LAMA5,KRT8,CELSR1,TUFT1,SHTN1,RIPK4,TMEM184A,KRT80,KRT18,BAIAP2L1,EFNA1,RHPN2,HSPA1A,MLF1,HSPA1B,DDX27,WWC1,PPL,FAM241B,BAIAP2,ADGRG1,MAL2,TOM1L1,TLCD1,PLPP2,PIP4K2C,FAM83H,IGSF3,P2RY2,PKP3,PLEKHG3,RAB5IF,PDGFB,RASEF,CCNJL,SPR,ELF3,MYO5B,EEF1A2,EPCAM,SDC4,ARHGEF16,EPB41L1,PAK4,F11R,WFDC2,PTPRF,PATJ,TNFRSF21,WNT7B,KRT15,AIF1L,MYH14,ARHGAP39,CYB561,TSPAN6,PIGT,LAPTM4B,TFAP2C,S…
HPA	gallbladder	HPA:0220000	1.44485e-10	32.6884	9.84018	7312	1247	611	18911	TSPAN15,KIAA1522,KRT8,TUFT1,RIPK4,KRT18,BAIAP2L1,HSPA1A,HSPA1B,WWC1,PPL,DDR1,CLDN4,FAM241B,BAIAP2,TLCD1,PIP4K2C,FAM83H,PKP3,CHMP4C,PLEKHG3,PDGFB,RASEF,PRXL2A,CCNJL,ELF3,MYO5B,EPCAM,SDC4,ARHGEF16,EPB41L1,GRB7,F11R,PATJ,TNFRSF21,TSKU,MYH14,TSPAN6,ANKEF1,ITGB4,CDS1,FOXA1,KIAA1671,SCNN1A,MAP7,PON3,ETNK2,VAPB,MET,SOWAHC,PCDH1,CGN,MAP3K9,ITGB6,ESRP1,ACOT4,KRT7,AGRN,EFNA5,CPVL,CEP170B,TACSTD2,CDH1,DSG2,…
HPA	gallbladder; glandular cells[‚â•Low]	HPA:0220051	1.44485e-10	32.6884	9.84018	7312	1247	611	18911	TSPAN15,KIAA1522,KRT8,TUFT1,RIPK4,KRT18,BAIAP2L1,HSPA1A,HSPA1B,WWC1,PPL,DDR1,CLDN4,FAM241B,BAIAP2,TLCD1,PIP4K2C,FAM83H,PKP3,CHMP4C,PLEKHG3,PDGFB,RASEF,PRXL2A,CCNJL,ELF3,MYO5B,EPCAM,SDC4,ARHGEF16,EPB41L1,GRB7,F11R,PATJ,TNFRSF21,TSKU,MYH14,TSPAN6,ANKEF1,ITGB4,CDS1,FOXA1,KIAA1671,SCNN1A,MAP7,PON3,ETNK2,VAPB,MET,SOWAHC,PCDH1,CGN,MAP3K9,ITGB6,ESRP1,ACOT4,KRT7,AGRN,EFNA5,CPVL,CEP170B,TACSTD2,CDH1,DSG2,…
TF	Factor: BTEB2; motif: WGGGTGKGGCNGGN; match class: 1	TF:M09972_1	1.45049e-10	32.6827	9.83848	3760	2664	708	18911	KIAA1522,LAMA5,KRT8,CELSR1,SHTN1,KRT80,EFNA1,HSPA1A,PPL,DDR1,PLPP2,FAM83H,IGSF3,BCAM,PKP3,EEF1A2,ARHGEF16,PAK4,GRB7,WFDC2,KRT15,AIF1L,CDS1,B3GNT5,VWA1,ETNK2,IQANK1,C19ORF33,MAP3K9,KRT7,AGRN,SFN,ST6GALNAC2,CEP170B,CDH1,TMEM54,LAMB3,CLDN9,CTTN,BCAP31,PRSS22,RCE1,SYT12,CARD10,WNT9A,JAG2,CLMN,PTPN3,CDC42BPG,TJP1,CMTM4,RGL3,STAU1,SLC2A4RG,PPP1R26,RAP1GAP,REPS2,MAB21L4,INHBB,TMEM265,MUC1,MPP3,PKP2,KLF5…
TF	Factor: E2F-1; motif: NGGGCGGGARV; match class: 1	TF:M07206_1	1.56499e-10	32.5731	9.80549	10389	3123	1988	18911	KIAA1522,CTSV,LAMA5,CELSR1,TUFT1,SHTN1,TMEM184A,KRT80,BAIAP2L1,EFNA1,RHPN2,MLF1,DDX27,WWC1,DDR1,FAM241B,BAIAP2,ADGRG1,MAL2,TLCD1,PLPP2,PIP4K2C,FAM83H,P2RY2,BCAM,PKP3,PLEKHG3,RAB5IF,PDGFB,RASEF,SPR,ELF3,MYO5B,EEF1A2,EPCAM,ARHGEF16,EPB41L1,PAK4,GRB7,WFDC2,PTPRF,PATJ,TNFRSF21,WNT7B,AIF1L,MYH14,CYB561,TSPAN6,PIGT,ANKEF1,TFAP2C,SLC39A1,CDS1,LLGL2,FOXA1,B3GNT5,MAP7,VWA1,PON3,ETNK2,IQANK1,KLC3,VAPB,TSPA…
GO:BP	tight junction assembly	GO:0120192	1.85352e-10	32.329	9.732	79	1202	28	18911	CLDN4,F11R,PATJ,CLDN9,CLDN1,LSR,TJP1,MARVELD3,CLDN7,MARVELD2,GRHL2,PARD6B,CLDN3,OCLN,PARD3,MICALL2,EPHA2,CRB3,ECT2,CLDN8,AFDN,CLDN23,RAB13,CLDN10,ACTN4,PRKCI,MPP7,MPP5
GO:BP	apical junction assembly	GO:0043297	1.85872e-10	32.325	9.73079	85	1202	29	18911	CLDN4,F11R,PATJ,CLDN9,CLDN1,TJP1,MARVELD3,CLDN7,MARVELD2,GRHL2,DLG5,PARD6B,CLDN3,OCLN,PARD3,MICALL2,EPHA2,CTNNA1,CRB3,ECT2,CLDN8,AFDN,CLDN23,RAB13,CLDN10,ACTN4,PRKCI,MPP7,MPP5
TF	Factor: BTEB2; motif: RGGGNGKGGN; match class: 1	TF:M07277_1	1.89579e-10	32.2965	9.72221	4021	2846	787	18911	LAMA5,KRT8,CELSR1,KRT18,EFNA1,RHPN2,BAIAP2,TLCD1,PLPP2,PIP4K2C,FAM83H,IGSF3,BCAM,PKP3,CCNJL,EEF1A2,SDC4,ARHGEF16,PAK4,GRB7,WFDC2,PTPRF,PATJ,AIF1L,MYH14,CYB561,CDS1,LLGL2,B3GNT5,VWA1,ETNK2,IQANK1,KLC3,VAPB,SOWAHC,LYPD3,CGN,MAP3K9,KRT7,AGRN,CEP170B,DSG2,CTTN,BCAP31,PRSS22,RCE1,WNT9A,JAG2,OVOL2,ATP1B1,CLMN,PTPN3,CDC42BPG,PRPF6,TGFA,TJP1,CMTM4,SHB,RGL3,SLC2A4RG,GRHL1,PPP1R26,RAP1GAP,PLEKHG6,INHBB,MUC…
REAC	Formation of the cornified envelope	REAC:R-HSA-6809371	2.00019e-10	32.2191	9.69893	127	1418	37	18911	KRT8,KRT80,KRT18,PPL,PKP3,KRT15,KRT7,PERP,DSG2,DSC2,KRT4,PKP2,KRT19,DSP,JUP,EVPL,PRSS8,KRT78,KLK5,KLK8,ST14,TCHH,KRT86,KRT17,KRT6A,PI3,KRT83,KRT81,KRT16,PCSK6,KRT23,SPINK5,KRT13,KRT5,IVL,SPRR1B,SPRR3
HPA	kidney	HPA:0270000	2.08564e-10	32.1588	9.68076	7699	1263	644	18911	TSPAN15,KIAA1522,KRT8,TUFT1,SHTN1,RIPK4,KRT18,BAIAP2L1,HSPA1A,HSPA1B,WWC1,PPL,DDR1,CLDN4,FAM241B,BAIAP2,TLCD1,PIP4K2C,FAM83H,PKP3,CHMP4C,PLEKHG3,PDGFB,RASEF,PRXL2A,CCNJL,ELF3,MYO5B,EPCAM,SDC4,ARHGEF16,EPB41L1,GRB7,F11R,WFDC2,PATJ,TNFRSF21,TSKU,AIF1L,MYH14,TSPAN6,ANKEF1,TFAP2C,CDS1,KIAA1671,SCNN1A,MAP7,ETNK2,VAPB,MET,SOWAHC,PCDH1,CGN,MAP3K9,ITGB6,ESRP1,ACOT4,KRT7,AGRN,EFNA5,CPVL,TMEM132A,CEP170B,C…
TF	Factor: Sp1; motif: GGGGCGGGGT; match class: 1	TF:M00008_1	2.1186e-10	32.1362	9.67395	4777	2537	826	18911	KIAA1522,CTSV,LAMA5,CELSR1,TUFT1,SHTN1,BAIAP2L1,EFNA1,RHPN2,HSPA1A,HSPA1B,DDX27,PPL,BAIAP2,MAL2,TLCD1,PLPP2,PIP4K2C,FAM83H,IGSF3,P2RY2,BCAM,PKP3,CHMP4C,EEF1A2,SDC4,ARHGEF16,GRB7,F11R,WFDC2,PATJ,MYH14,SLC39A1,CDS1,LLGL2,B3GNT5,MAP7,IQANK1,KLC3,VAPB,SOWAHC,C19ORF33,LYPD3,CGN,MAP3K9,ESRP2,AGRN,CEP170B,DSG2,CTTN,BCAP31,RCE1,SDC1,SYT12,FNBP1L,CARD10,WNT9A,JAG2,OVOL2,ZNF185,CLMN,PTPN3,SSH3,TGFA,TJP1,CM…
GO:BP	cell-cell junction assembly	GO:0007043	2.46133e-10	31.9198	9.60883	149	352	22	18911	CLDN4,PKP3,F11R,PATJ,CLDN9,CLDN1,LSR,TJP1,MARVELD3,CLDN7,PKP2,MARVELD2,CTNND1,GRHL2,DLG5,JUP,PARD6B,CLDN3,OCLN,PARD3,MICALL2,EPHA2
TF	Factor: Sp1; motif: GGNDGGRGGCGGGG	TF:M04953	2.60412e-10	31.8385	9.58434	8337	3274	1706	18911	TSPAN15,KIAA1522,CTSV,LAMA5,KRT8,CELSR1,SHTN1,TMEM184A,KRT80,KRT18,BAIAP2L1,EFNA1,RHPN2,SOX13,HSPA1A,HSPA1B,WWC1,PPL,DDR1,CLDN4,BAIAP2,MAL2,TOM1L1,TLCD1,PLPP2,PIP4K2C,FAM83H,IGSF3,P2RY2,BCAM,PKP3,PDGFB,CCNJL,MYO5B,EEF1A2,EPCAM,ARHGEF16,PAK4,GRB7,F11R,WFDC2,PTPRF,PATJ,MYH14,CYB561,TSPAN6,PIGT,LAPTM4B,ANKEF1,TFAP2C,SLC39A1,CDS1,LLGL2,FOXA1,KIAA1671,B3GNT5,SCNN1A,MAP7,VWA1,ETNK2,IQANK1,KLC3,TSPAN13,…
TF	Factor: ETF; motif: GVGGMGG	TF:M00695	2.65061e-10	31.813	9.57665	10050	3652	2223	18911	KIAA1522,CTSV,LAMA5,CELSR1,TUFT1,RIPK4,BAIAP2L1,RHPN2,HSPA1A,HSPA1B,DDX27,WWC1,PPL,BAIAP2,MAL2,PLPP2,FAM83H,IGSF3,P2RY2,BCAM,PKP3,PLEKHG3,RAB5IF,PDGFB,RASEF,CCNJL,MYO5B,EEF1A2,EPCAM,SDC4,ARHGEF16,NHLRC1,EPB41L1,PAK4,F11R,WFDC2,PTPRF,PATJ,TNFRSF21,WNT7B,TSKU,MYH14,ARHGAP39,CYB561,TSPAN6,PIGT,LAPTM4B,TFAP2C,CDS1,LLGL2,FOXA1,KIAA1671,B3GNT5,MAP7,VWA1,PON3,ETNK2,IQANK1,KLC3,VAPB,TSPAN13,MET,SOWAHC,PC…
TF	Factor: TCF-1; motif: ACATCGRGRCGCTGW; match class: 1	TF:M11601_1	2.66873e-10	31.8031	9.5737	10593	3535	2270	18911	TSPAN15,CTSV,LAMA5,KRT8,CELSR1,TUFT1,SHTN1,RIPK4,TMEM184A,KRT18,BAIAP2L1,EFNA1,RHPN2,HSPA1A,MLF1,HSPA1B,DDX27,WWC1,PPL,FAM241B,BAIAP2,ADGRG1,MAL2,TOM1L1,TLCD1,PLPP2,FAM83H,IGSF3,PLEKHG3,RAB5IF,PDGFB,RASEF,CCNJL,SPR,MYO5B,EEF1A2,EPCAM,SDC4,ARHGEF16,EPB41L1,PAK4,F11R,WFDC2,PTPRF,PATJ,TNFRSF21,WNT7B,KRT15,MYH14,ARHGAP39,CYB561,TSPAN6,PIGT,LAPTM4B,TFAP2C,ITGB4,CDS1,LLGL2,FOXA1,KIAA1671,B3GNT5,MAP7,PO…
WP	Nuclear Receptors Meta-Pathway	WP:WP2882	2.96698e-10	31.6503	9.52769	309	4651	134	18911	HSPA1A,PDGFB,SLC39A1,B3GNT5,SCNN1A,ETNK2,HES1,ABCC3,TGFA,G6PD,PRRG4,PLK2,SLC6A11,EHHADH,EGFR,EPHA2,SLC2A1,SRXN1,CYP1A1,NQO1,ME1,SQSTM1,ADGRF4,AMIGO2,EPB41L4B,PTGR1,MYOF,SERPINA1,NCOA6,AHR,SLC2A8,TGFB2,MGST1,RXRA,GCLC,SLC6A8,FTH1,S100P,ALDH3A1,SRC,SLC19A2,PPP1R14C,TNS4,GSTM3,GPX2,SLC5A12,CBR1,ABCC2,SLC2A12,JUN,SLC6A14,CYP1B1,GPX3,BHLHE40,PDK4,DNAJB1,CAP2,LRRC8A,FGFBP1,THBD,KTN1,CCND1,BLVRB,TXNRD3,…
HPA	salivary gland; glandular cells[‚â•Low]	HPA:0420051	3.05612e-10	31.6076	9.51483	6527	1106	499	18911	TSPAN15,KIAA1522,KRT8,TUFT1,KRT18,BAIAP2L1,HSPA1A,HSPA1B,WWC1,PPL,DDR1,CLDN4,BAIAP2,TLCD1,PIP4K2C,PKP3,CHMP4C,PLEKHG3,PDGFB,RASEF,PRXL2A,CCNJL,ELF3,MYO5B,SDC4,ARHGEF16,EPB41L1,GRB7,F11R,WFDC2,PATJ,TNFRSF21,KRT15,AIF1L,MYH14,CYB561,TSPAN6,ANKEF1,TFAP2C,CDS1,KIAA1671,SCNN1A,MAP7,ETNK2,KLC3,VAPB,MET,SOWAHC,PCDH1,CGN,MAP3K9,KRT7,AGRN,EFNA5,TMEM132A,CEP170B,TACSTD2,CDH1,S100A2,DSG2,EPN3,CLDN1,CTTN,BCA…
HPA	salivary gland	HPA:0420000	3.05612e-10	31.6076	9.51483	6527	1106	499	18911	TSPAN15,KIAA1522,KRT8,TUFT1,KRT18,BAIAP2L1,HSPA1A,HSPA1B,WWC1,PPL,DDR1,CLDN4,BAIAP2,TLCD1,PIP4K2C,PKP3,CHMP4C,PLEKHG3,PDGFB,RASEF,PRXL2A,CCNJL,ELF3,MYO5B,SDC4,ARHGEF16,EPB41L1,GRB7,F11R,WFDC2,PATJ,TNFRSF21,KRT15,AIF1L,MYH14,CYB561,TSPAN6,ANKEF1,TFAP2C,CDS1,KIAA1671,SCNN1A,MAP7,ETNK2,KLC3,VAPB,MET,SOWAHC,PCDH1,CGN,MAP3K9,KRT7,AGRN,EFNA5,TMEM132A,CEP170B,TACSTD2,CDH1,S100A2,DSG2,EPN3,CLDN1,CTTN,BCA…
HPA	pancreas	HPA:0350000	3.48003e-10	31.4202	9.45842	7039	1082	520	18911	TSPAN15,KIAA1522,KRT8,TUFT1,KRT18,BAIAP2L1,HSPA1A,HSPA1B,WWC1,PPL,DDR1,CLDN4,FAM241B,BAIAP2,TLCD1,PIP4K2C,FAM83H,PKP3,CHMP4C,PLEKHG3,PDGFB,RASEF,PRXL2A,CCNJL,ELF3,MYO5B,EEF1A2,EPCAM,SDC4,ARHGEF16,EPB41L1,GRB7,F11R,PATJ,TNFRSF21,TSKU,MYH14,CYB561,TSPAN6,ANKEF1,CDS1,KIAA1671,SCNN1A,MAP7,ETNK2,VAPB,MET,SOWAHC,PCDH1,CGN,MAP3K9,ITGB6,ESRP1,ACOT4,KRT7,EFNA5,CPVL,CEP170B,TACSTD2,CDH1,LAMB3,DSG2,EPN3,CLD…
GO:CC	apical plasma membrane	GO:0016324	3.63684e-10	31.3566	9.43928	366	4925	164	18911	CLDN4,MAL2,EPCAM,PATJ,SCNN1A,DSG2,CLDN1,ATP1B1,TJP1,MUC1,MARVELD2,SLC22A5,PARD6B,SPTBN2,ERBB3,PROM2,OCLN,EGFR,PARD3,STX3,EMP2,SLC2A1,SLC4A11,PRKCZ,CRB3,FOLR1,SHANK2,AMOTL2,SLC9A3R2,UPK2,ERBB2,RDX,KCNK1,PSEN2,SLC52A3,SLC46A1,ATP6V1B1,CD9,PTK2,ANO1,RAB17,GPR143,FZD6,PTPRH,P2RY6,UPK1B,RAB27B,PLD1,CTSL,SLC9A3R1,MUC20,SLC15A1,PRKCI,OSMR,MPP5,CEACAM6,SLC5A12,ABCC2,ABCG2,JAG1,CEACAM1,MYO7A,PRKG2,SLC34A3…
GO:CC	cell projection	GO:0042995	3.75368e-10	31.311	9.42554	2328	4751	746	18911	CTSV,SHTN1,MLF1,WWC1,BAIAP2,ADGRG1,GRB7,PTPRF,TNFRSF21,AIF1L,MYH14,LAPTM4B,FOXA1,SCNN1A,MAP7,KLC3,STARD10,CDH1,CTTN,ATP1B1,TJP1,STON2,STAU1,RAP1GAP,CAPN2,PLS1,PLEKHG6,WASL,DNAH14,CTNND1,AURKA,SLC22A5,DLG5,PLK2,NCKAP1,SYT7,ITGA3,PLEK2,GIPC1,PROM2,STX1A,SLC6A11,C1ORF115,BCAR1,PPFIA1,EPS8L1,COBL,IGSF9,EPPK1,PARD3,PTK6,MICALL2,PXN,EPHA2,PTPRK,IQCE,NAXE,INHA,FHDC1,STX3,L1CAM,RAB25,SNCG,CXADR,ARHGEF5,G…
TF	Factor: E2F-3; motif: GGCGGGN	TF:M02089	3.82451e-10	31.284	9.41742	12640	3472	2605	18911	TSPAN15,KIAA1522,CTSV,LAMA5,KRT8,CELSR1,TUFT1,SHTN1,RIPK4,TMEM184A,KRT18,BAIAP2L1,EFNA1,RHPN2,SOX13,HSPA1A,MLF1,HSPA1B,DDX27,WWC1,PPL,CLDN4,FAM241B,BAIAP2,ADGRG1,MAL2,TOM1L1,TLCD1,PLPP2,PIP4K2C,FAM83H,IGSF3,P2RY2,BCAM,PKP3,CHMP4C,PDGFB,RASEF,CCNJL,SPR,ELF3,MYO5B,EEF1A2,EPCAM,SDC4,ARHGEF16,PAK4,GRB7,F11R,WFDC2,PTPRF,PATJ,TNFRSF21,WNT7B,KRT15,AIF1L,MYH14,CYB561,PIGT,LAPTM4B,ANKEF1,TFAP2C,SLC39A1,CD…
TF	Factor: KLF15; motif: RCCMCRCCCMCN; match class: 1	TF:M12160_1	3.90039e-10	31.2557	9.40889	7712	2937	1438	18911	TSPAN15,KIAA1522,LAMA5,KRT8,CELSR1,TUFT1,SHTN1,RIPK4,TMEM184A,KRT80,KRT18,BAIAP2L1,EFNA1,RHPN2,HSPA1A,WWC1,PPL,DDR1,FAM241B,BAIAP2,TOM1L1,TLCD1,PLPP2,PIP4K2C,FAM83H,IGSF3,P2RY2,BCAM,PKP3,MYO5B,EEF1A2,ARHGEF16,PAK4,GRB7,F11R,WFDC2,PTPRF,PATJ,KRT15,MYH14,CYB561,TSPAN6,ANKEF1,SLC39A1,CDS1,LLGL2,FOXA1,KIAA1671,B3GNT5,SCNN1A,VWA1,PON3,ETNK2,IQANK1,KLC3,TSPAN13,MET,SOWAHC,PCDH1,MAP3K9,ESRP2,ESRP1,KRT7,…
TF	Factor: AP-2alpha; motif: GCCNNNRGS	TF:M00469	4.57793e-10	31.0246	9.33933	4963	2901	962	18911	KIAA1522,CTSV,LAMA5,KRT8,CELSR1,TUFT1,SHTN1,RIPK4,KRT80,KRT18,BAIAP2L1,EFNA1,RHPN2,BAIAP2,MAL2,TLCD1,PLPP2,FAM83H,IGSF3,P2RY2,BCAM,CHMP4C,PLEKHG3,PDGFB,CCNJL,SPR,MYO5B,EEF1A2,SDC4,ARHGEF16,EPB41L1,PTPRF,PATJ,TNFRSF21,WNT7B,KRT15,MYH14,ARHGAP39,CYB561,TFAP2C,FOXA1,IQANK1,SOWAHC,MAP3K9,ESRP2,ESRP1,ACOT4,EFNA5,KIAA0895,ST6GALNAC2,CEP170B,TMEM30B,TMEM54,CLDN1,CTTN,BCAP31,RCE1,CARD10,WNT9A,TACC2,GET4,…
TF	Factor: BTEB2; motif: GCCCCRCCCH	TF:M07409	4.58978e-10	31.0209	9.33821	5009	2563	869	18911	TSPAN15,LAMA5,KRT8,CELSR1,TUFT1,SHTN1,TMEM184A,KRT80,KRT18,BAIAP2L1,RHPN2,PPL,DDR1,BAIAP2,MAL2,PLPP2,PIP4K2C,FAM83H,IGSF3,P2RY2,BCAM,PKP3,CHMP4C,SPR,MYO5B,EEF1A2,EPCAM,SDC4,ARHGEF16,PAK4,GRB7,WFDC2,PATJ,MYH14,PIGT,LAPTM4B,TFAP2C,CDS1,LLGL2,B3GNT5,VWA1,ETNK2,IQANK1,KLC3,VAPB,SOWAHC,PCDH1,C19ORF33,LYPD3,CGN,MAP3K9,ESRP2,ESRP1,KRT7,AGRN,CEP170B,LAMB3,DSG2,CTTN,BCAP31,RCE1,SDC1,FNBP1L,WNT9A,C6ORF141,…
TF	Factor: TWIST; motif: CACCTGG; match class: 1	TF:M03582_1	5.022e-10	30.891	9.29912	2452	739	177	18911	TSPAN15,KIAA1522,SHTN1,RIPK4,TMEM184A,KRT18,HSPA1A,HSPA1B,PPL,MAP3K13,DDR1,CLDN4,ADGRG1,PIP4K2C,FAM83H,IGSF3,PKP3,PLEKHG3,RAB5IF,MYO5B,ARHGEF16,GRB7,F11R,PATJ,TNFRSF21,KRT15,TSKU,ARHGAP39,CYB561,SLC39A1,LLGL2,KIAA1671,MAP7,VWA1,IQANK1,SOWAHC,CGN,ESRP2,ESRP1,KRT7,TMEM132A,CEP170B,TMEM30B,AP1M2,DSG2,CLDN9,BCAP31,PRSS22,RCE1,SDC1,SYT12,C6ORF141,ZNF185,ABCC3,PTPN3,LSR,TGFA,MARVELD3,RGL3,STAU1,EPHX1,M…
GO:MF	cytoskeletal protein binding	GO:0008092	5.63838e-10	30.724	9.24885	980	2317	198	18911	SHTN1,BAIAP2L1,MYO5B,EPB41L1,AIF1L,MYH14,LLGL2,KLC3,VAPB,CGN,CDH1,CTTN,ZNF185,CLMN,PTPN3,SSH3,CAPN2,PLS1,WASL,KIFC3,SPIRE2,DLG5,GIPC1,MISP,SPTBN2,KIF21A,STX1A,EGFR,EPS8L1,COBL,FAM83D,PLEC,LIMCH1,MICALL2,PXN,HOOK1,FHDC1,ARPC1A,PACSIN3,RAB25,DUSP3,MTUS1,MLPH,ANXA8,MYO6,CLU,SVIL,DST,TNNT1,ESPN,CTNNA1,CAMSAP3,FAM110C,MID2,KIF3B,GAS8,S100A9,RAE1,DSTN,MYO5C,ANLN,DAG1,PLS3,EPS8L2,MARCKS,LMTK2,MAPRE3,CET…
TF	Factor: E2F-1; motif: NNNNGGCGGGAARN; match class: 1	TF:M09892_1	5.88729e-10	30.6617	9.23008	8809	2864	1576	18911	KIAA1522,CTSV,LAMA5,CELSR1,SHTN1,RIPK4,KRT80,BAIAP2L1,EFNA1,RHPN2,DDX27,WWC1,PPL,DDR1,BAIAP2,MAL2,TLCD1,PLPP2,PIP4K2C,IGSF3,P2RY2,BCAM,PKP3,CHMP4C,PLEKHG3,PDGFB,RASEF,CCNJL,SPR,ELF3,MYO5B,EEF1A2,EPCAM,ARHGEF16,EPB41L1,PAK4,GRB7,WFDC2,PTPRF,PATJ,WNT7B,AIF1L,MYH14,TSPAN6,PIGT,ANKEF1,TFAP2C,SLC39A1,CDS1,LLGL2,FOXA1,B3GNT5,MAP7,VWA1,PON3,ETNK2,KLC3,VAPB,TSPAN13,MET,SOWAHC,PCDH1,C19ORF33,MAP3K9,PMEPA1…
TF	Factor: AP-2alpha; motif: NSCCNCRGGSN	TF:M07348	6.36776e-10	30.5485	9.19601	7706	1176	627	18911	KIAA1522,CTSV,LAMA5,KRT8,CELSR1,SHTN1,TMEM184A,KRT18,BAIAP2L1,RHPN2,MAP3K13,FAM241B,BAIAP2,ADGRG1,PLPP2,PIP4K2C,FAM83H,IGSF3,P2RY2,BCAM,PKP3,RAB5IF,CCNJL,EEF1A2,EPCAM,SDC4,ARHGEF16,NHLRC1,GRB7,PTPRF,PATJ,TNFRSF21,WNT7B,KRT15,TSKU,AIF1L,MYH14,TSPAN6,PIGT,TFAP2C,ITGB4,CDS1,LLGL2,FOXA1,B3GNT5,VWA1,IQANK1,VAPB,TSPAN13,MET,SOWAHC,PCDH1,LYPD3,MAP3K9,ESRP2,ESRP1,STARD10,ACOT4,KRT7,AGRN,EFNA5,KIAA0895,YI…
TF	Factor: GKLF; motif: GCCMCRCCCNNN	TF:M01588	6.48662e-10	30.5218	9.18798	8552	3364	1792	18911	TSPAN15,KIAA1522,CTSV,LAMA5,KRT8,CELSR1,TUFT1,SHTN1,RIPK4,TMEM184A,KRT80,KRT18,BAIAP2L1,EFNA1,RHPN2,SOX13,DDX27,WWC1,PPL,MAP3K13,DDR1,BAIAP2,MAL2,TOM1L1,TLCD1,PLPP2,PIP4K2C,FAM83H,IGSF3,P2RY2,BCAM,PKP3,CHMP4C,PDGFB,RASEF,SPR,MYO5B,EEF1A2,EPCAM,SDC4,ARHGEF16,PAK4,GRB7,F11R,WFDC2,PATJ,WNT7B,KRT15,MYH14,CYB561,PIGT,LAPTM4B,TFAP2C,ITGB4,CDS1,LLGL2,B3GNT5,VWA1,ETNK2,IQANK1,KLC3,VAPB,TSPAN13,MET,SOWAHC…
GO:BP	bicellular tight junction assembly	GO:0070830	7.18583e-10	30.3741	9.14352	77	1202	27	18911	CLDN4,F11R,PATJ,CLDN9,CLDN1,TJP1,MARVELD3,CLDN7,MARVELD2,GRHL2,PARD6B,CLDN3,OCLN,PARD3,MICALL2,EPHA2,CRB3,ECT2,CLDN8,AFDN,CLDN23,RAB13,CLDN10,ACTN4,PRKCI,MPP7,MPP5
TF	Factor: HNRPUL1; motif: NCNCAGN; match class: 1	TF:M09746_1	7.40043e-10	30.3317	9.13074	7232	938	491	18911	TSPAN15,KIAA1522,LAMA5,SHTN1,RIPK4,KRT80,EFNA1,RHPN2,SOX13,HSPA1A,HSPA1B,DDX27,WWC1,PPL,DDR1,CLDN4,FAM241B,ADGRG1,MAL2,TOM1L1,TLCD1,PLPP2,PIP4K2C,FAM83H,BCAM,PLEKHG3,PDGFB,SPR,ELF3,MYO5B,EEF1A2,SDC4,GRB7,F11R,WFDC2,PATJ,WNT7B,KRT15,TSKU,AIF1L,MYH14,CYB561,LAPTM4B,ANKEF1,TFAP2C,SLC39A1,ITGB4,CDS1,LLGL2,KIAA1671,B3GNT5,SCNN1A,MAP7,VWA1,IQANK1,PCDH1,C19ORF33,LYPD3,PMEPA1,ESRP2,ESRP1,STARD10,KRT7,YIP…
HPA	rectum	HPA:0400000	7.93391e-10	30.2312	9.10051	7308	2010	934	18911	TSPAN15,KIAA1522,KRT8,TUFT1,SHTN1,KRT18,BAIAP2L1,HSPA1A,HSPA1B,WWC1,DDR1,CLDN4,FAM241B,BAIAP2,TLCD1,PIP4K2C,FAM83H,CHMP4C,PLEKHG3,PDGFB,RASEF,PRXL2A,CCNJL,ELF3,MYO5B,EPCAM,SDC4,ARHGEF16,EPB41L1,GRB7,F11R,WFDC2,PATJ,TNFRSF21,KRT15,TSKU,MYH14,CYB561,TSPAN6,ANKEF1,ITGB4,CDS1,FOXA1,KIAA1671,SCNN1A,MAP7,ETNK2,VAPB,MET,SOWAHC,PCDH1,CGN,MAP3K9,ITGB6,ESRP1,THRB,ACOT4,AGRN,EFNA5,SFN,TMEM132A,CEP170B,TACST…
HPA	rectum; glandular cells[‚â•Low]	HPA:0400051	7.93391e-10	30.2312	9.10051	7308	2010	934	18911	TSPAN15,KIAA1522,KRT8,TUFT1,SHTN1,KRT18,BAIAP2L1,HSPA1A,HSPA1B,WWC1,DDR1,CLDN4,FAM241B,BAIAP2,TLCD1,PIP4K2C,FAM83H,CHMP4C,PLEKHG3,PDGFB,RASEF,PRXL2A,CCNJL,ELF3,MYO5B,EPCAM,SDC4,ARHGEF16,EPB41L1,GRB7,F11R,WFDC2,PATJ,TNFRSF21,KRT15,TSKU,MYH14,CYB561,TSPAN6,ANKEF1,ITGB4,CDS1,FOXA1,KIAA1671,SCNN1A,MAP7,ETNK2,VAPB,MET,SOWAHC,PCDH1,CGN,MAP3K9,ITGB6,ESRP1,THRB,ACOT4,AGRN,EFNA5,SFN,TMEM132A,CEP170B,TACST…
TF	Factor: ETF; motif: CCCCGCCCCYN; match class: 1	TF:M07039_1	9.10402e-10	30.0328	9.04077	13037	2002	1582	18911	TSPAN15,KIAA1522,CTSV,LAMA5,KRT8,CELSR1,TUFT1,SHTN1,RIPK4,TMEM184A,KRT80,KRT18,BAIAP2L1,EFNA1,RHPN2,SOX13,HSPA1A,MLF1,HSPA1B,WWC1,PPL,MAP3K13,DDR1,FAM241B,BAIAP2,ADGRG1,MAL2,TOM1L1,TLCD1,PLPP2,PIP4K2C,FAM83H,IGSF3,P2RY2,BCAM,PKP3,CHMP4C,RAB5IF,PDGFB,RASEF,PRXL2A,CCNJL,SPR,MYO5B,EEF1A2,EPCAM,SDC4,ARHGEF16,NHLRC1,PAK4,GRB7,F11R,WFDC2,PTPRF,PATJ,TNFRSF21,WNT7B,KRT15,TSKU,AIF1L,MYH14,CYB561,TSPAN6,LA…
HPA	tonsil; squamous epithelial cells[‚â•Low]	HPA:0600221	9.12741e-10	30.0291	9.03965	6360	702	327	18911	KIAA1522,KRT8,TUFT1,RIPK4,BAIAP2L1,HSPA1A,HSPA1B,WWC1,PPL,DDR1,CLDN4,BAIAP2,PIP4K2C,FAM83H,PKP3,CHMP4C,PLEKHG3,PDGFB,PRXL2A,CCNJL,ELF3,MYO5B,SDC4,ARHGEF16,EPB41L1,GRB7,F11R,TNFRSF21,KRT15,TSKU,MYH14,CYB561,TSPAN6,ANKEF1,ITGB4,CDS1,FOXA1,KIAA1671,SCNN1A,MAP7,ETNK2,KLC3,VAPB,MET,SOWAHC,PCDH1,LYPD3,MAP3K9,ITGB6,ESRP1,EFNA5,SFN,TMEM132A,CEP170B,TACSTD2,CDH1,LAMB3,S100A2,DSG2,EPN3,CLDN1,CTTN,BCAP31,RC…
GO:BP	keratinocyte differentiation	GO:0030216	9.1704e-10	30.0223	9.03761	214	1531	65	18911	CTSV,KRT8,KRT80,KRT18,PPL,PKP3,KRT15,KRT7,SFN,PERP,DSG2,OVOL2,DSC2,GRHL1,KRT4,PKP2,CDH3,KRT19,GRHL2,DSP,JUP,KDF1,IRF6,TRIM16,ERRFI1,EVPL,SCEL,PRSS8,EPHA2,KRT78,KLK5,ST14,TCHH,KRT86,KRT17,KRT6A,TMEM79,FOXC1,CYP26B1,PI3,KRT83,YAP1,KRT81,KRT16,CTSL,PCSK6,KRT23,AQP3,ETV4,CNFN,EXPH5,AKR1C3,SPINK5,KRT13,OPN3,JAG1,KRT5,IVL,FOSL2,SPRR1B,SPRR3,SHARPIN,ZBED2,DSC3,PSAP
GO:BP	anatomical structure development	GO:0048856	9.18164e-10	30.0205	9.03708	5862	1879	758	18911	CTSV,LAMA5,KRT8,CELSR1,TUFT1,SHTN1,RIPK4,KRT80,KRT18,EFNA1,SOX13,HSPA1A,MLF1,HSPA1B,PPL,MAP3K13,DDR1,CLDN4,BAIAP2,ADGRG1,MAL2,FAM83H,IGSF3,PKP3,CHMP4C,PDGFB,PRXL2A,ELF3,EPCAM,SDC4,PAK4,GRB7,F11R,PTPRF,TNFRSF21,WNT7B,KRT15,TSKU,MYH14,PIGT,TFAP2C,SLC39A1,ITGB4,FOXA1,B3GNT5,ETNK2,MET,PCDH1,ITGB6,ESRP2,ESRP1,THRB,KRT7,AGRN,EFNA5,SFN,YIPF6,PERP,HES1,TACSTD2,CDH1,LAMB3,DSG2,CLDN1,CTTN,SDC1,CARD10,WNT9A…
GO:BP	tight junction organization	GO:0120193	9.76229e-10	29.9321	9.01045	84	1202	28	18911	CLDN4,F11R,PATJ,CLDN9,CLDN1,LSR,TJP1,MARVELD3,CLDN7,MARVELD2,GRHL2,PARD6B,CLDN3,OCLN,PARD3,MICALL2,EPHA2,CRB3,ECT2,CLDN8,AFDN,CLDN23,RAB13,CLDN10,ACTN4,PRKCI,MPP7,MPP5
TF	Factor: E2F-4; motif: SNGGGCGGGAANN; match class: 1	TF:M09894_1	1.0197e-09	29.8692	8.99153	13354	1602	1304	18911	TSPAN15,KIAA1522,CTSV,LAMA5,KRT8,CELSR1,TUFT1,SHTN1,RIPK4,KRT80,KRT18,BAIAP2L1,EFNA1,RHPN2,SOX13,HSPA1A,MLF1,HSPA1B,DDX27,WWC1,PPL,DDR1,CLDN4,FAM241B,BAIAP2,ADGRG1,MAL2,TOM1L1,TLCD1,PLPP2,PIP4K2C,FAM83H,IGSF3,P2RY2,BCAM,PKP3,CHMP4C,PLEKHG3,PDGFB,RASEF,CCNJL,SPR,ELF3,MYO5B,EEF1A2,EPCAM,SDC4,ARHGEF16,EPB41L1,PAK4,GRB7,F11R,WFDC2,PTPRF,PATJ,TNFRSF21,WNT7B,AIF1L,MYH14,CYB561,TSPAN6,PIGT,LAPTM4B,ANKEF…
TF	Factor: Sp2; motif: GYCCCGCCYCYNNNN; match class: 1	TF:M07129_1	1.05301e-09	29.8228	8.97757	2353	2998	516	18911	TSPAN15,CELSR1,RHPN2,PPL,BAIAP2,PIP4K2C,FAM83H,IGSF3,P2RY2,BCAM,PKP3,EEF1A2,SDC4,ARHGEF16,GRB7,MYH14,ANKEF1,CDS1,LLGL2,B3GNT5,ETNK2,IQANK1,KLC3,VAPB,SOWAHC,PCDH1,C19ORF33,MAP3K9,AGRN,CEP170B,CTTN,BCAP31,RCE1,SDC1,WNT9A,JAG2,CLMN,PTPN3,CDC42BPG,TJP1,CMTM4,SHB,SLC2A4RG,GRHL1,PPP1R26,RAP1GAP,PLEKHG6,INHBB,PKP2,MARVELD2,G6PD,TBC1D8,CDH3,SPIRE2,DSP,CACNG4,PANX2,TMEM40,NUDT14,PLEKHA7,SEZ6L2,STX1A,TC2N,…
TF	Factor: AP-2gamma; motif: GCCYNCRGSN	TF:M03811	1.06167e-09	29.811	8.97401	8497	2053	1123	18911	KIAA1522,CTSV,KRT8,CELSR1,SHTN1,RIPK4,TMEM184A,KRT80,KRT18,EFNA1,RHPN2,HSPA1A,HSPA1B,PPL,MAP3K13,DDR1,FAM241B,MAL2,FAM83H,PKP3,CHMP4C,PLEKHG3,RAB5IF,PDGFB,ELF3,MYO5B,EEF1A2,EPCAM,SDC4,GRB7,F11R,WFDC2,PTPRF,PATJ,TNFRSF21,WNT7B,KRT15,TSKU,MYH14,ARHGAP39,CYB561,TSPAN6,PIGT,LAPTM4B,TFAP2C,SLC39A1,ITGB4,LLGL2,B3GNT5,MAP7,VWA1,PON3,ETNK2,IQANK1,KLC3,VAPB,CGN,MAP3K9,STARD10,ACOT4,KRT7,AGRN,EFNA5,KIAA089…
GO:BP	developmental process	GO:0032502	1.12077e-09	29.7329	8.95049	6373	1879	813	18911	KIAA1522,CTSV,LAMA5,KRT8,CELSR1,TUFT1,SHTN1,RIPK4,KRT80,KRT18,EFNA1,SOX13,HSPA1A,MLF1,HSPA1B,WWC1,PPL,MAP3K13,DDR1,CLDN4,BAIAP2,ADGRG1,MAL2,FAM83H,IGSF3,PKP3,CHMP4C,PDGFB,PRXL2A,ELF3,EPCAM,SDC4,PAK4,GRB7,F11R,WFDC2,PTPRF,TNFRSF21,WNT7B,KRT15,TSKU,MYH14,PIGT,TFAP2C,SLC39A1,ITGB4,CDS1,FOXA1,B3GNT5,ETNK2,MET,PCDH1,ITGB6,ESRP2,ESRP1,THRB,KRT7,AGRN,EFNA5,SFN,YIPF6,PERP,HES1,TACSTD2,CDH1,LAMB3,DSG2,CLD…
HPA	colon; glandular cells[‚â•Low]	HPA:0130051	1.1676e-09	29.6738	8.9327	7229	2010	924	18911	TSPAN15,KIAA1522,KRT8,TUFT1,KRT18,BAIAP2L1,HSPA1A,HSPA1B,WWC1,DDR1,CLDN4,FAM241B,BAIAP2,TLCD1,PIP4K2C,FAM83H,CHMP4C,PLEKHG3,PDGFB,RASEF,PRXL2A,CCNJL,ELF3,MYO5B,EPCAM,SDC4,ARHGEF16,EPB41L1,GRB7,F11R,WFDC2,PATJ,TNFRSF21,KRT15,TSKU,AIF1L,MYH14,CYB561,TSPAN6,ANKEF1,ITGB4,FOXA1,KIAA1671,SCNN1A,MAP7,ETNK2,VAPB,MET,SOWAHC,PCDH1,CGN,MAP3K9,ITGB6,ESRP1,THRB,ACOT4,AGRN,EFNA5,TMEM132A,CEP170B,CDH1,DSG2,EPN3…
HPA	breast	HPA:0050000	1.19516e-09	29.6401	8.92257	6839	916	436	18911	TSPAN15,KIAA1522,KRT8,TUFT1,KRT18,BAIAP2L1,HSPA1A,HSPA1B,WWC1,PPL,DDR1,CLDN4,FAM241B,BAIAP2,TLCD1,PIP4K2C,FAM83H,PKP3,CHMP4C,PLEKHG3,PDGFB,RASEF,PRXL2A,CCNJL,MYO5B,EPCAM,SDC4,ARHGEF16,EPB41L1,GRB7,F11R,WFDC2,PATJ,TNFRSF21,KRT15,AIF1L,MYH14,CYB561,TSPAN6,ANKEF1,TFAP2C,ITGB4,FOXA1,KIAA1671,SCNN1A,MAP7,PON3,ETNK2,KLC3,VAPB,MET,SOWAHC,PCDH1,CGN,MAP3K9,ESRP1,THRB,KRT7,AGRN,EFNA5,CEP170B,TACSTD2,CDH1,L…
TF	Factor: ZF5; motif: NRNGNGCGCGCWN; match class: 1	TF:M00333_1	1.20264e-09	29.6312	8.91987	11901	3593	2548	18911	TSPAN15,KIAA1522,CTSV,LAMA5,KRT8,CELSR1,TUFT1,SHTN1,RIPK4,KRT18,BAIAP2L1,EFNA1,RHPN2,HSPA1B,WWC1,PPL,FAM241B,BAIAP2,MAL2,TOM1L1,TLCD1,PLPP2,FAM83H,IGSF3,P2RY2,PKP3,PLEKHG3,RAB5IF,PDGFB,RASEF,CCNJL,SPR,MYO5B,EEF1A2,EPCAM,SDC4,ARHGEF16,NHLRC1,F11R,WFDC2,PTPRF,PATJ,TNFRSF21,WNT7B,AIF1L,ARHGAP39,CYB561,TSPAN6,PIGT,LAPTM4B,ANKEF1,TFAP2C,SLC39A1,ITGB4,CDS1,LLGL2,FOXA1,B3GNT5,MAP7,VWA1,PON3,ETNK2,IQANK1…
GO:CC	plasma membrane	GO:0005886	1.26026e-09	29.5636	8.89954	5236	473	219	18911	TSPAN15,CTSV,KRT8,CELSR1,TMEM184A,KRT18,BAIAP2L1,EFNA1,HSPA1A,HSPA1B,WWC1,PPL,DDR1,CLDN4,BAIAP2,ADGRG1,MAL2,TLCD1,PLPP2,P2RY2,BCAM,PKP3,CHMP4C,PDGFB,EPCAM,SDC4,EPB41L1,GRB7,F11R,PTPRF,PATJ,TNFRSF21,WNT7B,AIF1L,TSPAN6,LAPTM4B,SLC39A1,ITGB4,LLGL2,SCNN1A,MAP7,VAPB,TSPAN13,MET,PCDH1,C19ORF33,LYPD3,CGN,ITGB6,PMEPA1,AGRN,TRIM16L,EFNA5,PERP,TACSTD2,CDH1,TMEM30B,DSG2,EPN3,CLDN9,CLDN1,CTTN,BCAP31,RCE1,SDC…
GO:MF	cell adhesion mediator activity	GO:0098631	1.28405e-09	29.5366	8.89142	60	419	15	18911	KRT18,BAIAP2L1,BAIAP2,BCAM,PKP3,EPCAM,PAK4,DSG2,DSC2,PKP2,DSP,JUP,IGSF9,CXADR,TRIM29
GO:BP	actin filament bundle organization	GO:0061572	1.39363e-09	29.4185	8.85585	159	1146	38	18911	SHTN1,BAIAP2L1,BAIAP2,SDC4,F11R,AIF1L,MET,TACSTD2,TJP1,PLS1,SPIRE2,ID1,PPFIA1,LIMCH1,PXN,FHDC1,ARHGEF5,RHOD,RAC1,ESPN,CARMIL1,ITGB5,PHLDB2,S100A10,PLS3,MARCKS,RDX,PFN2,WNT4,SPIRE1,EPHA1,DMTN,PPP1R9A,EPS8,SRC,CX3CL1,ACTN4,ARHGEF10L
TF	Factor: SP1; motif: CCCCKCCCCC	TF:M02281	1.45668e-09	29.3547	8.83664	6236	2359	973	18911	KIAA1522,CTSV,LAMA5,KRT8,CELSR1,KRT80,KRT18,BAIAP2L1,RHPN2,WWC1,PPL,CLDN4,BAIAP2,TOM1L1,TLCD1,PLPP2,PIP4K2C,FAM83H,IGSF3,P2RY2,BCAM,PKP3,RASEF,CCNJL,MYO5B,EEF1A2,EPCAM,ARHGEF16,PAK4,GRB7,F11R,PTPRF,PATJ,MYH14,CYB561,PIGT,LAPTM4B,ANKEF1,SLC39A1,CDS1,LLGL2,FOXA1,B3GNT5,SCNN1A,VWA1,ETNK2,IQANK1,KLC3,TSPAN13,SOWAHC,PCDH1,C19ORF33,CGN,MAP3K9,ESRP2,ESRP1,KRT7,AGRN,CEP170B,HES1,TMEM54,AP1M2,S100A2,DSG2,…
HPA	appendix; glandular cells[‚â•Low]	HPA:0030051	1.55616e-09	29.2594	8.80795	6953	1153	541	18911	TSPAN15,KIAA1522,KRT8,TUFT1,KRT18,BAIAP2L1,HSPA1A,HSPA1B,WWC1,DDR1,CLDN4,FAM241B,BAIAP2,TLCD1,PIP4K2C,FAM83H,PKP3,CHMP4C,PLEKHG3,PDGFB,RASEF,PRXL2A,ELF3,MYO5B,EPCAM,SDC4,ARHGEF16,EPB41L1,GRB7,F11R,WFDC2,PATJ,TNFRSF21,KRT15,TSKU,MYH14,CYB561,TSPAN6,ANKEF1,ITGB4,CDS1,FOXA1,KIAA1671,SCNN1A,MAP7,ETNK2,KLC3,VAPB,MET,SOWAHC,PCDH1,CGN,MAP3K9,ITGB6,ESRP1,THRB,ACOT4,EFNA5,SFN,TMEM132A,CEP170B,CDH1,LAMB3,D…
HPA	fallopian tube; glandular cells[‚â•Low]	HPA:0210051	1.57691e-09	29.2403	8.80219	7076	1153	549	18911	TSPAN15,KIAA1522,KRT8,TUFT1,KRT18,BAIAP2L1,HSPA1A,HSPA1B,WWC1,PPL,DDR1,CLDN4,BAIAP2,TLCD1,FAM83H,PLEKHG3,PDGFB,RASEF,PRXL2A,ELF3,MYO5B,EPCAM,SDC4,ARHGEF16,EPB41L1,GRB7,F11R,WFDC2,PATJ,TNFRSF21,TSKU,MYH14,CYB561,TSPAN6,ANKEF1,ITGB4,CDS1,KIAA1671,SCNN1A,MAP7,ETNK2,KLC3,VAPB,MET,SOWAHC,PCDH1,CGN,MAP3K9,ITGB6,ESRP1,ACOT4,KRT7,AGRN,EFNA5,SFN,TMEM132A,CEP170B,TACSTD2,CDH1,DSG2,EPN3,CLDN1,CTTN,BCAP31,RC…
HPA	fallopian tube	HPA:0210000	1.57691e-09	29.2403	8.80219	7076	1153	549	18911	TSPAN15,KIAA1522,KRT8,TUFT1,KRT18,BAIAP2L1,HSPA1A,HSPA1B,WWC1,PPL,DDR1,CLDN4,BAIAP2,TLCD1,FAM83H,PLEKHG3,PDGFB,RASEF,PRXL2A,ELF3,MYO5B,EPCAM,SDC4,ARHGEF16,EPB41L1,GRB7,F11R,WFDC2,PATJ,TNFRSF21,TSKU,MYH14,CYB561,TSPAN6,ANKEF1,ITGB4,CDS1,KIAA1671,SCNN1A,MAP7,ETNK2,KLC3,VAPB,MET,SOWAHC,PCDH1,CGN,MAP3K9,ITGB6,ESRP1,ACOT4,KRT7,AGRN,EFNA5,SFN,TMEM132A,CEP170B,TACSTD2,CDH1,DSG2,EPN3,CLDN1,CTTN,BCAP31,RC…
TF	Factor: SP2; motif: GGGCGGGAC; match class: 1	TF:M01783_1	1.66908e-09	29.1583	8.77752	4185	2321	678	18911	KIAA1522,CTSV,LAMA5,CELSR1,TUFT1,RIPK4,BAIAP2L1,EFNA1,RHPN2,PPL,BAIAP2,MAL2,PLPP2,PIP4K2C,FAM83H,IGSF3,P2RY2,BCAM,PDGFB,SPR,MYO5B,EEF1A2,SDC4,ARHGEF16,PAK4,GRB7,PTPRF,KRT15,MYH14,LAPTM4B,TFAP2C,CDS1,LLGL2,B3GNT5,PON3,ETNK2,IQANK1,KLC3,VAPB,TSPAN13,MET,SOWAHC,C19ORF33,LYPD3,CGN,MAP3K9,ESRP2,AGRN,SFN,CEP170B,TMEM54,TRIM47,CTTN,BCAP31,RCE1,CARD10,WNT9A,JAG2,OVOL2,ZNF185,CLMN,SSH3,TJP1,CMTM4,GRAMD2A,…
GO:MF	cell-cell adhesion mediator activity	GO:0098632	1.71451e-09	29.1196	8.76586	51	419	14	18911	KRT18,BAIAP2L1,BAIAP2,PKP3,EPCAM,PAK4,DSG2,DSC2,PKP2,DSP,JUP,IGSF9,CXADR,TRIM29
TF	Factor: EGR1; motif: NACGCCCACGCANW	TF:M03896	1.7809e-09	29.0647	8.74936	5904	3532	1335	18911	KIAA1522,KRT8,CELSR1,KRT18,EFNA1,HSPA1A,HSPA1B,WWC1,PPL,FAM241B,BAIAP2,TOM1L1,TLCD1,PLPP2,FAM83H,IGSF3,PDGFB,RASEF,CCNJL,MYO5B,EEF1A2,EPCAM,SDC4,ARHGEF16,NHLRC1,PAK4,PTPRF,PATJ,TNFRSF21,AIF1L,CYB561,ANKEF1,TFAP2C,CDS1,FOXA1,B3GNT5,MAP7,VWA1,ETNK2,IQANK1,KLC3,VAPB,TSPAN13,SOWAHC,PCDH1,MAP3K9,ACOT4,AGRN,EFNA5,KIAA0895,CEP170B,CDH1,TMEM30B,TMEM54,TRIM47,EPN3,CLDN1,CTTN,BCAP31,RTL8A,SYT12,CARD10,WNT9…
HPA	skin 2	HPA:0470000	2.00829e-09	28.8914	8.69717	6429	793	365	18911	TSPAN15,KIAA1522,TUFT1,RIPK4,BAIAP2L1,HSPA1A,HSPA1B,WWC1,PPL,DDR1,CLDN4,FAM241B,BAIAP2,TLCD1,PIP4K2C,FAM83H,IGSF3,PKP3,CHMP4C,PLEKHG3,PDGFB,RASEF,PRXL2A,CCNJL,ELF3,MYO5B,SDC4,ARHGEF16,EPB41L1,GRB7,F11R,PATJ,TNFRSF21,KRT15,AIF1L,MYH14,CYB561,TSPAN6,ANKEF1,TFAP2C,ITGB4,CDS1,KIAA1671,SCNN1A,MAP7,ETNK2,KLC3,VAPB,MET,SOWAHC,PCDH1,LYPD3,MAP3K9,ESRP1,AGRN,EFNA5,SFN,PERP,CEP170B,TACSTD2,CDH1,LAMB3,S100A2…
HPA	skin 2; epidermal cells[‚â•Low]	HPA:0470681	2.00829e-09	28.8914	8.69717	6429	793	365	18911	TSPAN15,KIAA1522,TUFT1,RIPK4,BAIAP2L1,HSPA1A,HSPA1B,WWC1,PPL,DDR1,CLDN4,FAM241B,BAIAP2,TLCD1,PIP4K2C,FAM83H,IGSF3,PKP3,CHMP4C,PLEKHG3,PDGFB,RASEF,PRXL2A,CCNJL,ELF3,MYO5B,SDC4,ARHGEF16,EPB41L1,GRB7,F11R,PATJ,TNFRSF21,KRT15,AIF1L,MYH14,CYB561,TSPAN6,ANKEF1,TFAP2C,ITGB4,CDS1,KIAA1671,SCNN1A,MAP7,ETNK2,KLC3,VAPB,MET,SOWAHC,PCDH1,LYPD3,MAP3K9,ESRP1,AGRN,EFNA5,SFN,PERP,CEP170B,TACSTD2,CDH1,LAMB3,S100A2…
REAC	Tight junction interactions	REAC:R-HSA-420029	2.11022e-09	28.82	8.67567	30	1202	16	18911	CLDN4,F11R,PATJ,CLDN9,CLDN1,CLDN7,PARD6B,CLDN3,PARD3,CRB3,CLDN12,CLDN8,CLDN23,CLDN10,PRKCI,MPP5
TF	Factor: Miz-1; motif: NNRGGWGGGGGAGGGGMRR	TF:M10112	2.22408e-09	28.7441	8.65285	8355	3502	1813	18911	TSPAN15,KIAA1522,CTSV,LAMA5,KRT8,CELSR1,SHTN1,TMEM184A,KRT80,KRT18,BAIAP2L1,EFNA1,RHPN2,HSPA1A,MLF1,WWC1,PPL,CLDN4,BAIAP2,ADGRG1,TOM1L1,TLCD1,PLPP2,PIP4K2C,FAM83H,IGSF3,P2RY2,BCAM,PKP3,PLEKHG3,CCNJL,ELF3,MYO5B,EEF1A2,EPCAM,ARHGEF16,PAK4,GRB7,F11R,PATJ,AIF1L,CYB561,TSPAN6,LAPTM4B,ANKEF1,TFAP2C,SLC39A1,CDS1,LLGL2,FOXA1,KIAA1671,B3GNT5,SCNN1A,IQANK1,KLC3,TSPAN13,MET,PCDH1,C19ORF33,LYPD3,CGN,MAP3K9,E…
GO:BP	cell projection organization	GO:0030030	2.24674e-09	28.7295	8.64845	1600	4083	467	18911	LAMA5,SHTN1,EFNA1,MAP3K13,DDR1,BAIAP2,SDC4,PAK4,GRB7,PTPRF,TNFRSF21,WNT7B,TSKU,AIF1L,AGRN,EFNA5,HES1,TACSTD2,CDH1,CTTN,FNBP1L,CLMN,RAP1GAP,PLS1,WASL,LAMC2,KLF5,AURKA,ID1,YTHDF1,DLG5,PLK2,NCKAP1,SEMA4B,PARD6B,ITGA3,PLEK2,SPTBN2,LAMA3,PROM2,OCLN,EGFR,RYK,EPS8L1,SYT17,COBL,IGSF9,SEMA3E,PARD3,PTK6,MICALL2,ADGRF1,EPHA2,PTPRK,OBSL1,FHDC1,STX3,L1CAM,RAB25,F2RL1,LAMB1,EMP2,CDC42EP4,RHOV,RHOD,ADGRV1,RAC1,…
HPA	seminal vesicle; glandular cells[‚â•Low]	HPA:0430051	2.43525e-09	28.6133	8.61346	6491	706	332	18911	TSPAN15,KIAA1522,KRT8,TUFT1,KRT18,BAIAP2L1,HSPA1A,HSPA1B,WWC1,PPL,DDR1,CLDN4,FAM241B,BAIAP2,TLCD1,PIP4K2C,FAM83H,CHMP4C,PLEKHG3,PDGFB,RASEF,PRXL2A,CCNJL,ELF3,MYO5B,EEF1A2,EPCAM,SDC4,ARHGEF16,EPB41L1,GRB7,F11R,WFDC2,PATJ,TSKU,AIF1L,MYH14,CYB561,TSPAN6,ANKEF1,TFAP2C,ITGB4,CDS1,KIAA1671,SCNN1A,MAP7,ETNK2,VAPB,MET,SOWAHC,PCDH1,CGN,MAP3K9,ESRP1,ACOT4,KRT7,AGRN,EFNA5,SFN,CPVL,TMEM132A,TACSTD2,CDH1,DSG2…
HPA	seminal vesicle	HPA:0430000	2.43525e-09	28.6133	8.61346	6491	706	332	18911	TSPAN15,KIAA1522,KRT8,TUFT1,KRT18,BAIAP2L1,HSPA1A,HSPA1B,WWC1,PPL,DDR1,CLDN4,FAM241B,BAIAP2,TLCD1,PIP4K2C,FAM83H,CHMP4C,PLEKHG3,PDGFB,RASEF,PRXL2A,CCNJL,ELF3,MYO5B,EEF1A2,EPCAM,SDC4,ARHGEF16,EPB41L1,GRB7,F11R,WFDC2,PATJ,TSKU,AIF1L,MYH14,CYB561,TSPAN6,ANKEF1,TFAP2C,ITGB4,CDS1,KIAA1671,SCNN1A,MAP7,ETNK2,VAPB,MET,SOWAHC,PCDH1,CGN,MAP3K9,ESRP1,ACOT4,KRT7,AGRN,EFNA5,SFN,CPVL,TMEM132A,TACSTD2,CDH1,DSG2…
GO:BP	movement of cell or subcellular component	GO:0006928	2.62982e-09	28.5024	8.58007	2143	533	124	18911	LAMA5,CELSR1,SHTN1,EFNA1,WWC1,DDR1,CLDN4,ADGRG1,FAM83H,PDGFB,MYO5B,EPCAM,SDC4,ARHGEF16,PAK4,GRB7,F11R,PTPRF,MYH14,ITGB4,KLC3,MET,ITGB6,EFNA5,HES1,TACSTD2,CDH1,LAMB3,S100A2,DSG2,CLDN1,CTTN,SDC1,FNBP1L,CARD10,OVOL2,ATP1B1,TJP1,MARVELD3,DSC2,SIX4,RAP1GAP,WASL,LAMC2,PKP2,KIFC3,CXCL16,DNAH14,ID1,YTHDF1,DLG5,NANOS1,LMNA,DSP,PLK2,GCNT2,NCKAP1,SEMA4B,JUP,PARD6B,ITGA3,GIPC1,MISP,SPTBN2,ERBB3,LAMA3,KIF21A,…
TF	Factor: MAZ; motif: GGGMGGGGS	TF:M10432	2.92174e-09	28.3505	8.53436	8872	2853	1580	18911	TSPAN15,KIAA1522,LAMA5,KRT8,CELSR1,TUFT1,SHTN1,KRT80,KRT18,BAIAP2L1,EFNA1,RHPN2,HSPA1A,HSPA1B,WWC1,CLDN4,FAM241B,BAIAP2,TLCD1,PLPP2,FAM83H,IGSF3,P2RY2,PKP3,PLEKHG3,RAB5IF,PDGFB,PRXL2A,CCNJL,MYO5B,EEF1A2,EPCAM,SDC4,ARHGEF16,GRB7,WFDC2,PTPRF,PATJ,TNFRSF21,KRT15,AIF1L,MYH14,CYB561,LAPTM4B,ANKEF1,SLC39A1,ITGB4,CDS1,LLGL2,FOXA1,KIAA1671,B3GNT5,SCNN1A,MAP7,VWA1,ETNK2,IQANK1,KLC3,VAPB,TSPAN13,MET,SOWAHC…
HPA	epididymis	HPA:0180000	2.95295e-09	28.3352	8.52974	6981	1243	579	18911	TSPAN15,KIAA1522,KRT8,TUFT1,SHTN1,KRT18,BAIAP2L1,HSPA1A,HSPA1B,WWC1,PPL,DDR1,CLDN4,FAM241B,BAIAP2,TLCD1,PIP4K2C,CHMP4C,PLEKHG3,PDGFB,RASEF,PRXL2A,CCNJL,MYO5B,EPCAM,SDC4,ARHGEF16,GRB7,F11R,WFDC2,PATJ,TNFRSF21,TSKU,AIF1L,MYH14,CYB561,TSPAN6,ANKEF1,TFAP2C,ITGB4,CDS1,KIAA1671,SCNN1A,MAP7,KLC3,VAPB,MET,SOWAHC,PCDH1,CGN,MAP3K9,ITGB6,ESRP1,ACOT4,KRT7,AGRN,EFNA5,CEP170B,TACSTD2,CDH1,LAMB3,DSG2,EPN3,CLDN1…
HPA	epididymis; glandular cells[‚â•Low]	HPA:0180051	2.95295e-09	28.3352	8.52974	6981	1243	579	18911	TSPAN15,KIAA1522,KRT8,TUFT1,SHTN1,KRT18,BAIAP2L1,HSPA1A,HSPA1B,WWC1,PPL,DDR1,CLDN4,FAM241B,BAIAP2,TLCD1,PIP4K2C,CHMP4C,PLEKHG3,PDGFB,RASEF,PRXL2A,CCNJL,MYO5B,EPCAM,SDC4,ARHGEF16,GRB7,F11R,WFDC2,PATJ,TNFRSF21,TSKU,AIF1L,MYH14,CYB561,TSPAN6,ANKEF1,TFAP2C,ITGB4,CDS1,KIAA1671,SCNN1A,MAP7,KLC3,VAPB,MET,SOWAHC,PCDH1,CGN,MAP3K9,ITGB6,ESRP1,ACOT4,KRT7,AGRN,EFNA5,CEP170B,TACSTD2,CDH1,LAMB3,DSG2,EPN3,CLDN1…
GO:BP	supramolecular fiber organization	GO:0097435	3.2238e-09	28.2086	8.49163	716	637	65	18911	KRT8,SHTN1,BAIAP2L1,HSPA1A,HSPA1B,BAIAP2,MYO5B,SDC4,F11R,AIF1L,MET,TACSTD2,CTTN,SSH3,TJP1,SIX4,PLS1,WASL,PKP2,SPIRE2,KRT19,ID1,DSP,NCKAP1,BFSP1,SPTBN2,OCLN,BCAR1,PPFIA1,COBL,EPPK1,LTBP3,LIMCH1,MICALL2,PXN,HOOK1,OBSL1,FHDC1,ARPC1A,ARHGEF5,F2RL1,EMP2,CDC42EP4,MYO6,RHOD,CLU,SVIL,RAC1,DST,TNNT1,ESPN,CARMIL1,CAMSAP3,RHOBTB3,ITGB5,PHLDB2,APP,S100A10,DSTN,MYO5C,PLS3,MARCKS,MAPRE3,MID1,RDX
GO:CC	plasma membrane bounded cell projection	GO:0120025	3.61115e-09	28.0449	8.44236	2232	4751	713	18911	CTSV,SHTN1,MLF1,WWC1,BAIAP2,ADGRG1,PTPRF,TNFRSF21,AIF1L,MYH14,FOXA1,SCNN1A,MAP7,KLC3,STARD10,CDH1,CTTN,ATP1B1,STON2,STAU1,RAP1GAP,CAPN2,PLS1,PLEKHG6,WASL,DNAH14,CTNND1,AURKA,SLC22A5,DLG5,PLK2,NCKAP1,SYT7,ITGA3,PLEK2,GIPC1,PROM2,STX1A,SLC6A11,C1ORF115,BCAR1,PPFIA1,EPS8L1,COBL,IGSF9,PARD3,PTK6,MICALL2,PXN,EPHA2,PTPRK,IQCE,NAXE,INHA,FHDC1,STX3,L1CAM,RAB25,SNCG,CXADR,GNGT1,F2RL1,ANXA3,MLPH,ADAM15,MYO…
GO:BP	actin filament bundle assembly	GO:0051017	3.67899e-09	28.018	8.43427	156	1146	37	18911	BAIAP2L1,BAIAP2,SDC4,F11R,AIF1L,MET,TACSTD2,TJP1,PLS1,SPIRE2,ID1,PPFIA1,LIMCH1,PXN,FHDC1,ARHGEF5,RHOD,RAC1,ESPN,CARMIL1,ITGB5,PHLDB2,S100A10,PLS3,MARCKS,RDX,PFN2,WNT4,SPIRE1,EPHA1,DMTN,PPP1R9A,EPS8,SRC,CX3CL1,ACTN4,ARHGEF10L
GO:BP	cell differentiation	GO:0030154	3.81482e-09	27.9657	8.41853	4199	1253	399	18911	KIAA1522,CTSV,LAMA5,KRT8,CELSR1,SHTN1,KRT80,KRT18,EFNA1,SOX13,HSPA1A,MLF1,HSPA1B,PPL,MAP3K13,DDR1,BAIAP2,ADGRG1,PKP3,PDGFB,PRXL2A,ELF3,EPCAM,SDC4,PAK4,GRB7,F11R,PTPRF,TNFRSF21,WNT7B,KRT15,TSKU,PIGT,ITGB4,CDS1,FOXA1,MET,ITGB6,ESRP1,THRB,KRT7,AGRN,EFNA5,SFN,YIPF6,PERP,HES1,TACSTD2,CDH1,LAMB3,DSG2,CLDN1,CTTN,SDC1,WNT9A,JAG2,OVOL2,STYK1,CLMN,LSR,TJP1,STON2,SHB,DSC2,SIX4,GRHL1,RAP1GAP,KRT4,CAPN2,PLS1,…
GO:BP	plasma membrane bounded cell projection organization	GO:0120036	4.07832e-09	27.8694	8.38952	1560	1945	249	18911	LAMA5,SHTN1,EFNA1,MAP3K13,DDR1,BAIAP2,SDC4,PAK4,GRB7,PTPRF,TNFRSF21,WNT7B,TSKU,AIF1L,AGRN,EFNA5,HES1,TACSTD2,CDH1,CTTN,FNBP1L,CLMN,RAP1GAP,PLS1,WASL,LAMC2,KLF5,AURKA,ID1,YTHDF1,DLG5,PLK2,NCKAP1,SEMA4B,PARD6B,ITGA3,PLEK2,SPTBN2,LAMA3,OCLN,EGFR,RYK,EPS8L1,SYT17,COBL,IGSF9,SEMA3E,PARD3,PTK6,MICALL2,ADGRF1,EPHA2,PTPRK,OBSL1,FHDC1,STX3,L1CAM,RAB25,F2RL1,LAMB1,EMP2,CDC42EP4,RHOD,ADGRV1,RAC1,ESPN,CTNNA1…
GO:MF	cadherin binding involved in cell-cell adhesion	GO:0098641	4.16916e-09	27.8376	8.37995	18	55	6	18911	KRT18,BAIAP2L1,BAIAP2,PKP3,EPCAM,PAK4
TF	Factor: SP1; motif: NCCCCKCCCCC	TF:M07226	4.21859e-09	27.8206	8.37483	7956	2466	1252	18911	TSPAN15,KIAA1522,CTSV,LAMA5,KRT8,CELSR1,TUFT1,SHTN1,TMEM184A,KRT80,KRT18,BAIAP2L1,EFNA1,RHPN2,WWC1,PPL,DDR1,CLDN4,BAIAP2,MAL2,TOM1L1,TLCD1,PLPP2,PIP4K2C,FAM83H,IGSF3,P2RY2,BCAM,PKP3,CHMP4C,CCNJL,SPR,MYO5B,EEF1A2,EPCAM,SDC4,ARHGEF16,PAK4,GRB7,F11R,WFDC2,PTPRF,PATJ,TNFRSF21,MYH14,CYB561,PIGT,LAPTM4B,ANKEF1,TFAP2C,SLC39A1,CDS1,LLGL2,FOXA1,B3GNT5,SCNN1A,VWA1,ETNK2,IQANK1,KLC3,VAPB,TSPAN13,SOWAHC,PCDH…
TF	Factor: KLF15; motif: RCCMCRCCCMCN	TF:M12160	4.39779e-09	27.7606	8.35677	12196	2390	1765	18911	TSPAN15,KIAA1522,CTSV,LAMA5,KRT8,CELSR1,TUFT1,SHTN1,RIPK4,TMEM184A,KRT80,KRT18,BAIAP2L1,EFNA1,RHPN2,SOX13,HSPA1A,MLF1,HSPA1B,DDX27,WWC1,PPL,MAP3K13,DDR1,CLDN4,FAM241B,BAIAP2,ADGRG1,TOM1L1,TLCD1,PLPP2,PIP4K2C,FAM83H,IGSF3,P2RY2,BCAM,PKP3,RAB5IF,RASEF,CCNJL,MYO5B,EEF1A2,EPCAM,SDC4,ARHGEF16,EPB41L1,PAK4,GRB7,F11R,WFDC2,PTPRF,PATJ,TNFRSF21,KRT15,MYH14,CYB561,TSPAN6,PIGT,LAPTM4B,ANKEF1,SLC39A1,ITGB4,C…
TF	Factor: GKLF; motif: NNCCMCRCCCN; match class: 1	TF:M12173_1	4.72892e-09	27.6558	8.32524	4791	2885	921	18911	TSPAN15,CTSV,CELSR1,TUFT1,RIPK4,TMEM184A,BAIAP2L1,EFNA1,RHPN2,DDX27,BAIAP2,TLCD1,PIP4K2C,FAM83H,IGSF3,BCAM,PKP3,CHMP4C,RASEF,CCNJL,EEF1A2,EPCAM,SDC4,ARHGEF16,PAK4,GRB7,F11R,WFDC2,PATJ,MYH14,TFAP2C,CDS1,LLGL2,B3GNT5,VWA1,ETNK2,IQANK1,KLC3,TSPAN13,MET,SOWAHC,C19ORF33,LYPD3,CGN,MAP3K9,ESRP2,ESRP1,ACOT4,AGRN,SFN,CEP170B,HES1,TMEM54,LAMB3,DSG2,CTTN,BCAP31,RCE1,SDC1,CARD10,WNT9A,JAG2,CLMN,PTPN3,SSH3,CD…
TF	Factor: SP4; motif: SCCCCGCCCCS	TF:M01273	4.76733e-09	27.6442	8.32172	3192	2642	598	18911	LAMA5,KRT8,CELSR1,SHTN1,KRT18,BAIAP2L1,RHPN2,PPL,BAIAP2,MAL2,PLPP2,PIP4K2C,FAM83H,IGSF3,P2RY2,BCAM,PKP3,CHMP4C,SPR,MYO5B,EEF1A2,SDC4,ARHGEF16,PAK4,GRB7,WFDC2,PATJ,MYH14,PIGT,LAPTM4B,TFAP2C,CDS1,LLGL2,B3GNT5,VWA1,IQANK1,KLC3,C19ORF33,CGN,MAP3K9,ESRP2,AGRN,CEP170B,DSG2,CTTN,BCAP31,RCE1,FNBP1L,WNT9A,JAG2,OVOL2,CLMN,CDC42BPG,TJP1,CMTM4,SHB,RGL3,SLC2A4RG,GRHL1,PPP1R26,RAP1GAP,REPS2,PLEKHG6,MAB21L4,INH…
TF	Factor: SP1; motif: NCCCCKCCCCC; match class: 1	TF:M07226_1	4.98918e-09	27.5786	8.30197	3795	2847	740	18911	LAMA5,KRT8,CELSR1,KRT18,BAIAP2L1,RHPN2,DDR1,BAIAP2,TLCD1,PLPP2,PIP4K2C,FAM83H,IGSF3,BCAM,PKP3,EEF1A2,EPCAM,ARHGEF16,GRB7,PATJ,MYH14,ANKEF1,CDS1,LLGL2,FOXA1,B3GNT5,ETNK2,IQANK1,KLC3,VAPB,SOWAHC,PCDH1,LYPD3,CGN,MAP3K9,ESRP2,ESRP1,KRT7,AGRN,CEP170B,HES1,DSG2,CTTN,BCAP31,RCE1,SDC1,FNBP1L,WNT9A,JAG2,OVOL2,CLMN,GPRC5C,CDC42BPG,PRPF6,TJP1,CMTM4,SHB,RGL3,STAU1,SLC2A4RG,GRHL1,PPP1R26,RAP1GAP,REPS2,PLEKHG6…
TF	Factor: E2F; motif: GGCGSG	TF:M00803	5.03817e-09	27.5645	8.29773	12627	2800	2116	18911	TSPAN15,KIAA1522,CTSV,LAMA5,KRT8,CELSR1,TUFT1,SHTN1,RIPK4,KRT80,KRT18,BAIAP2L1,EFNA1,RHPN2,HSPA1A,HSPA1B,WWC1,PPL,CLDN4,FAM241B,BAIAP2,MAL2,TOM1L1,TLCD1,PLPP2,PIP4K2C,FAM83H,IGSF3,P2RY2,BCAM,PKP3,CHMP4C,PLEKHG3,RAB5IF,PDGFB,RASEF,CCNJL,SPR,MYO5B,EEF1A2,EPCAM,SDC4,ARHGEF16,NHLRC1,EPB41L1,PAK4,F11R,PTPRF,PATJ,TNFRSF21,WNT7B,AIF1L,MYH14,ARHGAP39,CYB561,TSPAN6,PIGT,LAPTM4B,ANKEF1,TFAP2C,SLC39A1,ITGB4…
HPA	kidney; cells in tubules[‚â•Low]	HPA:0270361	5.11423e-09	27.5428	8.29122	7482	1263	621	18911	KIAA1522,KRT8,TUFT1,SHTN1,RIPK4,KRT18,BAIAP2L1,HSPA1A,WWC1,PPL,DDR1,CLDN4,FAM241B,BAIAP2,TLCD1,PIP4K2C,FAM83H,PKP3,CHMP4C,PLEKHG3,PDGFB,RASEF,PRXL2A,CCNJL,ELF3,MYO5B,EPCAM,SDC4,ARHGEF16,EPB41L1,GRB7,F11R,WFDC2,PATJ,TNFRSF21,TSKU,AIF1L,MYH14,TSPAN6,ANKEF1,TFAP2C,CDS1,KIAA1671,SCNN1A,MAP7,ETNK2,VAPB,MET,SOWAHC,PCDH1,CGN,MAP3K9,ITGB6,ESRP1,ACOT4,KRT7,AGRN,EFNA5,CPVL,TMEM132A,CEP170B,CDH1,LAMB3,S100A…
GO:BP	animal organ development	GO:0048513	5.93502e-09	27.3281	8.22658	3577	1698	451	18911	CTSV,LAMA5,KRT8,CELSR1,TUFT1,KRT80,KRT18,EFNA1,SOX13,HSPA1A,MLF1,HSPA1B,PPL,DDR1,CLDN4,BAIAP2,ADGRG1,FAM83H,IGSF3,PKP3,PDGFB,PRXL2A,ELF3,EPCAM,SDC4,WNT7B,KRT15,TSKU,MYH14,TFAP2C,SLC39A1,ITGB4,FOXA1,B3GNT5,ETNK2,MET,ITGB6,ESRP2,ESRP1,THRB,KRT7,AGRN,SFN,PERP,HES1,TACSTD2,CDH1,LAMB3,DSG2,CLDN1,SDC1,WNT9A,JAG2,TACC2,OVOL2,PTPN3,LSR,TGFA,STON2,DSC2,SIX4,GRHL1,RAP1GAP,KRT4,PLS1,TFAP2A,INHBB,LAMC2,PKP2,…
TF	Factor: ZNF148; motif: NNNNNNCCNNCCCCTCCCCCACCCN	TF:M09834	6.39525e-09	27.2204	8.19414	6678	2359	1030	18911	TSPAN15,KIAA1522,CTSV,LAMA5,KRT8,CELSR1,SHTN1,KRT80,KRT18,BAIAP2L1,EFNA1,RHPN2,HSPA1A,WWC1,PPL,DDR1,CLDN4,BAIAP2,TLCD1,PLPP2,PIP4K2C,FAM83H,IGSF3,P2RY2,BCAM,PKP3,MYO5B,EEF1A2,EPCAM,ARHGEF16,PAK4,GRB7,F11R,WFDC2,PTPRF,PATJ,MYH14,CYB561,LAPTM4B,ANKEF1,SLC39A1,CDS1,LLGL2,FOXA1,KIAA1671,B3GNT5,SCNN1A,IQANK1,TSPAN13,SOWAHC,PCDH1,C19ORF33,MAP3K9,ESRP2,ESRP1,KRT7,AGRN,ST6GALNAC2,CEP170B,HES1,CDH1,TMEM54…
GO:BP	cellular developmental process	GO:0048869	8.04059e-09	26.8901	8.09471	4269	683	242	18911	KIAA1522,CTSV,LAMA5,KRT8,CELSR1,SHTN1,KRT80,KRT18,EFNA1,SOX13,HSPA1A,MLF1,HSPA1B,PPL,MAP3K13,DDR1,BAIAP2,ADGRG1,PKP3,PDGFB,PRXL2A,ELF3,EPCAM,SDC4,PAK4,GRB7,F11R,PTPRF,TNFRSF21,WNT7B,KRT15,TSKU,MYH14,PIGT,ITGB4,CDS1,FOXA1,MET,ITGB6,ESRP1,THRB,KRT7,AGRN,EFNA5,SFN,YIPF6,PERP,HES1,TACSTD2,CDH1,LAMB3,DSG2,CLDN1,CTTN,SDC1,WNT9A,JAG2,OVOL2,STYK1,CLMN,LSR,TJP1,STON2,SHB,DSC2,SIX4,GRHL1,RAP1GAP,KRT4,CAPN2…
TF	Factor: FKLF; motif: BGGGNGGVMD	TF:M01837	8.11245e-09	26.8772	8.09085	5257	3272	1116	18911	CTSV,LAMA5,BAIAP2L1,RHPN2,MLF1,DDX27,WWC1,PPL,CLDN4,BAIAP2,MAL2,TLCD1,PLPP2,FAM83H,P2RY2,PKP3,PDGFB,RASEF,ELF3,GRB7,PTPRF,WNT7B,CYB561,IQANK1,VAPB,MET,PCDH1,MAP3K9,ESRP2,ESRP1,ACOT4,KRT7,AGRN,SFN,KIAA0895,ST6GALNAC2,PERP,TMEM132A,CEP170B,CDH1,TMEM30B,TMEM54,DSG2,TRIM47,EPN3,BCAP31,PRSS22,CARD10,STYK1,CLMN,PTPN3,SSH3,GPRC5C,CDC42BPG,PRPF6,TJP1,CMTM4,GRAMD2A,SHB,ZNF205,STAU1,SLC2A4RG,PPP1R26,EPHX1,…
TF	Factor: ZF5; motif: GSGCGCGR; match class: 1	TF:M00716_1	8.37506e-09	26.8313	8.07701	13495	2873	2297	18911	TSPAN15,KIAA1522,CTSV,LAMA5,KRT8,CELSR1,TUFT1,SHTN1,RIPK4,TMEM184A,KRT18,BAIAP2L1,EFNA1,RHPN2,HSPA1A,HSPA1B,DDX27,WWC1,PPL,FAM241B,BAIAP2,MAL2,TOM1L1,TLCD1,PLPP2,PIP4K2C,FAM83H,IGSF3,P2RY2,BCAM,PKP3,CHMP4C,PLEKHG3,RAB5IF,PDGFB,RASEF,CCNJL,SPR,ELF3,MYO5B,EEF1A2,EPCAM,SDC4,ARHGEF16,NHLRC1,EPB41L1,PAK4,GRB7,F11R,WFDC2,PTPRF,PATJ,TNFRSF21,WNT7B,AIF1L,MYH14,ARHGAP39,CYB561,TSPAN6,PIGT,LAPTM4B,ANKEF1,T…
TF	Factor: Osx; motif: CCNCCCCCNNN; match class: 1	TF:M07329_1	9.07867e-09	26.7149	8.04198	2456	2862	506	18911	KIAA1522,LAMA5,KRT8,RIPK4,KRT18,WWC1,PPL,BAIAP2,PIP4K2C,FAM83H,BCAM,RASEF,EEF1A2,ARHGEF16,GRB7,ANKEF1,CDS1,LLGL2,FOXA1,ETNK2,IQANK1,VAPB,PCDH1,CGN,MAP3K9,ESRP2,ESRP1,AGRN,CEP170B,DSG2,CTTN,RTL8A,WNT9A,JAG2,ATP1B1,CLMN,SSH3,CDC42BPG,TJP1,STAU1,SLC2A4RG,GRHL1,PPP1R26,RAP1GAP,REPS2,INHBB,PKP2,G6PD,CTNND1,CDH3,SPIRE2,NANOS1,DSP,SYT7,JUP,PARD6B,CACNG4,PANX2,MISP,PLEKHA7,MCOLN3,POR,PCSK1N,OCLN,PPFIA1,I…
HPA	stomach 1	HPA:0540000	9.59081e-09	26.6357	8.01814	7296	2010	925	18911	TSPAN15,KIAA1522,KRT8,TUFT1,RIPK4,KRT18,BAIAP2L1,HSPA1A,HSPA1B,WWC1,PPL,DDR1,FAM241B,BAIAP2,TLCD1,PIP4K2C,FAM83H,CHMP4C,PLEKHG3,PDGFB,RASEF,PRXL2A,CCNJL,ELF3,MYO5B,SDC4,ARHGEF16,EPB41L1,GRB7,F11R,PATJ,TNFRSF21,TSKU,MYH14,CYB561,TSPAN6,ANKEF1,ITGB4,CDS1,FOXA1,KIAA1671,SCNN1A,MAP7,ETNK2,VAPB,MET,SOWAHC,PCDH1,CGN,MAP3K9,ITGB6,ESRP1,THRB,ACOT4,KRT7,AGRN,EFNA5,TMEM132A,CDH1,LAMB3,DSG2,EPN3,CLDN1,CTTN,…
HPA	stomach 1; glandular cells[‚â•Low]	HPA:0540051	9.59081e-09	26.6357	8.01814	7296	2010	925	18911	TSPAN15,KIAA1522,KRT8,TUFT1,RIPK4,KRT18,BAIAP2L1,HSPA1A,HSPA1B,WWC1,PPL,DDR1,FAM241B,BAIAP2,TLCD1,PIP4K2C,FAM83H,CHMP4C,PLEKHG3,PDGFB,RASEF,PRXL2A,CCNJL,ELF3,MYO5B,SDC4,ARHGEF16,EPB41L1,GRB7,F11R,PATJ,TNFRSF21,TSKU,MYH14,CYB561,TSPAN6,ANKEF1,ITGB4,CDS1,FOXA1,KIAA1671,SCNN1A,MAP7,ETNK2,VAPB,MET,SOWAHC,PCDH1,CGN,MAP3K9,ITGB6,ESRP1,THRB,ACOT4,KRT7,AGRN,EFNA5,TMEM132A,CDH1,LAMB3,DSG2,EPN3,CLDN1,CTTN,…
GO:BP	cell-cell adhesion	GO:0098609	9.95584e-09	26.5818	8.00192	824	524	64	18911	LAMA5,CELSR1,KRT18,BAIAP2L1,SOX13,CLDN4,BAIAP2,PKP3,EPCAM,SDC4,PAK4,F11R,PTPRF,TNFRSF21,WNT7B,FOXA1,PCDH1,EFNA5,PERP,HES1,CDH1,DSG2,CLDN9,CLDN1,TJP1,MPZL2,DSC2,CLDN7,PKP2,VMP1,KIFC3,CTNND1,CDH3,DLG5,DSP,GCNT2,JUP,LAMA3,PLEKHA7,CLDN3,EGFR,NECTIN4,IGSF9,OBSL1,PVR,L1CAM,SPINT2,CXADR,DUSP3,ANXA9,TRIM29,LAMB1,VTCN1,ADGRV1,RAC1,CTNNA1,CD24,CAMSAP3,SCRIB,NECTIN2,ITGB5,PRKCZ,S100A9,YES1
TF	Factor: GKLF; motif: NNNRGGNGNGGSN; match class: 1	TF:M07289_1	9.96747e-09	26.5801	8.00142	10104	1494	967	18911	TSPAN15,KIAA1522,LAMA5,KRT8,CELSR1,TUFT1,SHTN1,TMEM184A,KRT80,KRT18,BAIAP2L1,EFNA1,RHPN2,SOX13,HSPA1A,MLF1,WWC1,PPL,DDR1,CLDN4,FAM241B,BAIAP2,ADGRG1,TOM1L1,TLCD1,PLPP2,PIP4K2C,FAM83H,IGSF3,P2RY2,BCAM,PKP3,PDGFB,RASEF,PRXL2A,CCNJL,MYO5B,EEF1A2,EPCAM,SDC4,ARHGEF16,PAK4,GRB7,F11R,WFDC2,PTPRF,PATJ,TNFRSF21,KRT15,MYH14,CYB561,TSPAN6,LAPTM4B,SLC39A1,LLGL2,FOXA1,KIAA1671,B3GNT5,SCNN1A,MAP7,VWA1,ETNK2,IQ…
TF	Factor: MAZ; motif: GGGGGAGGGGGNGRGRRRGNRG	TF:M09984	1.01726e-08	26.5507	7.99257	9153	1700	1001	18911	TSPAN15,KIAA1522,LAMA5,KRT8,CELSR1,SHTN1,KRT80,KRT18,BAIAP2L1,EFNA1,RHPN2,SOX13,HSPA1A,MLF1,WWC1,CLDN4,BAIAP2,ADGRG1,TLCD1,PLPP2,FAM83H,IGSF3,BCAM,PKP3,PDGFB,CCNJL,MYO5B,EEF1A2,EPCAM,SDC4,ARHGEF16,EPB41L1,PAK4,GRB7,WFDC2,PTPRF,PATJ,WNT7B,AIF1L,MYH14,ARHGAP39,CYB561,TSPAN6,LAPTM4B,ANKEF1,SLC39A1,CDS1,LLGL2,FOXA1,KIAA1671,B3GNT5,SCNN1A,VWA1,ETNK2,IQANK1,KLC3,SOWAHC,PCDH1,C19ORF33,CGN,MAP3K9,ESRP2,E…
HPA	skin 1	HPA:0460000	1.04011e-08	26.5187	7.98292	6747	1243	560	18911	TSPAN15,KIAA1522,TUFT1,RIPK4,BAIAP2L1,HSPA1A,HSPA1B,WWC1,PPL,DDR1,CLDN4,BAIAP2,TLCD1,PIP4K2C,FAM83H,PKP3,CHMP4C,PLEKHG3,PDGFB,RASEF,PRXL2A,CCNJL,ELF3,MYO5B,SDC4,ARHGEF16,EPB41L1,GRB7,F11R,PATJ,TNFRSF21,KRT15,TSKU,AIF1L,MYH14,CYB561,TSPAN6,ANKEF1,TFAP2C,ITGB4,CDS1,KIAA1671,SCNN1A,MAP7,ETNK2,KLC3,VAPB,MET,SOWAHC,PCDH1,LYPD3,MAP3K9,ESRP1,THRB,AGRN,EFNA5,SFN,PERP,CEP170B,TACSTD2,CDH1,LAMB3,S100A2,DSG…
TF	Factor: ZNF692; motif: SYNGGSCCCASCCNC; match class: 1	TF:M09734_1	1.04428e-08	26.5129	7.98118	6010	3020	1173	18911	TSPAN15,KIAA1522,LAMA5,KRT8,CELSR1,SHTN1,RIPK4,KRT80,BAIAP2L1,SOX13,HSPA1A,WWC1,PPL,DDR1,FAM241B,BAIAP2,TLCD1,PLPP2,FAM83H,IGSF3,P2RY2,BCAM,PKP3,PDGFB,PRXL2A,EEF1A2,EPCAM,ARHGEF16,EPB41L1,GRB7,WFDC2,PATJ,KRT15,AIF1L,CYB561,TSPAN6,SLC39A1,CDS1,LLGL2,SCNN1A,ETNK2,IQANK1,MET,SOWAHC,PCDH1,C19ORF33,MAP3K9,KRT7,AGRN,SFN,ST6GALNAC2,TMEM132A,CEP170B,HES1,TACSTD2,CDH1,LAMB3,S100A2,DSG2,CLDN9,BCAP31,RTL8A,…
TF	Factor: ZIC4; motif: NNCCNCCCRYNGYGN	TF:M12227	1.06566e-08	26.4837	7.97238	10563	2863	1850	18911	KIAA1522,LAMA5,CELSR1,SHTN1,TMEM184A,BAIAP2L1,EFNA1,RHPN2,HSPA1B,DDX27,WWC1,PPL,MAP3K13,DDR1,CLDN4,FAM241B,BAIAP2,TOM1L1,TLCD1,PLPP2,PIP4K2C,FAM83H,IGSF3,P2RY2,BCAM,PKP3,PLEKHG3,RAB5IF,RASEF,CCNJL,SPR,ELF3,MYO5B,EEF1A2,EPCAM,SDC4,ARHGEF16,NHLRC1,PAK4,GRB7,F11R,WFDC2,PTPRF,PATJ,WNT7B,KRT15,TSKU,AIF1L,MYH14,CYB561,LAPTM4B,ANKEF1,TFAP2C,SLC39A1,CDS1,LLGL2,FOXA1,KIAA1671,B3GNT5,MAP7,VWA1,PON3,ETNK2,I…
HP	Skin erosion	HP:0200041	1.11014e-08	26.4247	7.95462	17	366	9	18911	ITGB4,LAMB3,LAMC2,LMNA,DSP,JUP,LAMA3,PLEC,NAXE
HPA	duodenum	HPA:0150000	1.14332e-08	26.3822	7.94183	7414	1263	614	18911	TSPAN15,KIAA1522,KRT8,TUFT1,RIPK4,KRT18,BAIAP2L1,HSPA1A,HSPA1B,WWC1,DDR1,CLDN4,BAIAP2,TLCD1,PIP4K2C,FAM83H,PKP3,CHMP4C,PLEKHG3,PDGFB,RASEF,PRXL2A,CCNJL,ELF3,MYO5B,EPCAM,SDC4,ARHGEF16,EPB41L1,GRB7,F11R,WFDC2,PATJ,TNFRSF21,KRT15,TSKU,MYH14,CYB561,TSPAN6,ANKEF1,ITGB4,CDS1,FOXA1,KIAA1671,SCNN1A,MAP7,ETNK2,VAPB,MET,SOWAHC,PCDH1,CGN,MAP3K9,ITGB6,ESRP1,THRB,ACOT4,AGRN,EFNA5,CEP170B,CDH1,LAMB3,DSG2,EPN3,…
HPA	duodenum; glandular cells[‚â•Low]	HPA:0150051	1.14332e-08	26.3822	7.94183	7414	1263	614	18911	TSPAN15,KIAA1522,KRT8,TUFT1,RIPK4,KRT18,BAIAP2L1,HSPA1A,HSPA1B,WWC1,DDR1,CLDN4,BAIAP2,TLCD1,PIP4K2C,FAM83H,PKP3,CHMP4C,PLEKHG3,PDGFB,RASEF,PRXL2A,CCNJL,ELF3,MYO5B,EPCAM,SDC4,ARHGEF16,EPB41L1,GRB7,F11R,WFDC2,PATJ,TNFRSF21,KRT15,TSKU,MYH14,CYB561,TSPAN6,ANKEF1,ITGB4,CDS1,FOXA1,KIAA1671,SCNN1A,MAP7,ETNK2,VAPB,MET,SOWAHC,PCDH1,CGN,MAP3K9,ITGB6,ESRP1,THRB,ACOT4,AGRN,EFNA5,CEP170B,CDH1,LAMB3,DSG2,EPN3,…
GO:BP	cell-substrate adhesion	GO:0031589	1.1705e-08	26.3483	7.93163	357	924	52	18911	LAMA5,EFNA1,DDR1,BCAM,PDGFB,SDC4,ITGB4,LYPD3,ITGB6,EFNA5,TACSTD2,LAMB3,CTTN,ID1,GCNT2,JUP,ITGA3,PPFIA1,SEMA3E,LIMCH1,MICALL2,PXN,PTPRK,L1CAM,DUSP3,LAMB1,EMP2,ADAM15,AGR2,RHOD,RAC1,CARMIL1,CAMSAP3,ITGB5,PHLDB2,PRKCZ,SRCIN1,S100A10,DAG1,ITGA2,AJUBA,MDK,RIN2,PTK2,ITGB8,ATRN,PIK3CB,WNT4,EPHA1,LYPD5,FERMT1,DMTN
TF	Factor: BTEB2; motif: GCCCCRCCCH; match class: 1	TF:M07409_1	1.18199e-08	26.3342	7.92739	1775	2547	352	18911	LAMA5,KRT8,CELSR1,KRT18,RHPN2,DDR1,BAIAP2,PIP4K2C,FAM83H,IGSF3,P2RY2,BCAM,EEF1A2,ARHGEF16,MYH14,CDS1,LLGL2,B3GNT5,ETNK2,IQANK1,KLC3,LYPD3,CGN,MAP3K9,AGRN,CEP170B,DSG2,CTTN,BCAP31,RCE1,SDC1,JAG2,CLMN,TJP1,CMTM4,SHB,RGL3,SLC2A4RG,PPP1R26,RAP1GAP,REPS2,PLEKHG6,INHBB,MPP3,PKP2,KLF5,MARVELD2,G6PD,TBC1D8,SPIRE2,CACNG4,PANX2,TMEM40,NUDT14,SEZ6L2,STX1A,TC2N,HID1,CTSD,COBL,PFKFB2,EPPK1,MRGBP,HMGB3,TSEN34,…
GO:CC	cytoskeleton	GO:0005856	1.25164e-08	26.2516	7.90252	2179	637	142	18911	KRT8,SHTN1,KRT80,KRT18,BAIAP2L1,HSPA1A,MLF1,HSPA1B,PPL,BAIAP2,FAM83H,CCNJL,MYO5B,EPB41L1,PATJ,KRT15,AIF1L,MYH14,ARHGAP39,LLGL2,MAP7,KLC3,CGN,ITGB6,KRT7,CEP170B,CDH1,CTTN,FNBP1L,TACC2,ZNF185,PTPN3,SSH3,CDC42BPG,TJP1,MPZL2,STAU1,KRT4,CAPN2,PLS1,PLEKHG6,WASL,PKP2,KIFC3,DNAH14,G6PD,AURKA,SPIRE2,KRT19,ID1,DLG5,LMNA,DSP,PLK2,LAD1,NCKAP1,JUP,KDF1,BFSP1,PLEK2,RASSF10,MISP,SPTBN2,KIF21A,PLEKHA7,STX1A,EVPL…
GO:BP	system development	GO:0048731	1.31483e-08	26.1805	7.88113	4825	1667	575	18911	CTSV,LAMA5,KRT8,CELSR1,TUFT1,SHTN1,KRT80,KRT18,EFNA1,SOX13,HSPA1A,MLF1,HSPA1B,PPL,MAP3K13,DDR1,CLDN4,BAIAP2,ADGRG1,MAL2,FAM83H,IGSF3,PKP3,PDGFB,PRXL2A,ELF3,EPCAM,SDC4,PAK4,GRB7,PTPRF,TNFRSF21,WNT7B,KRT15,TSKU,MYH14,PIGT,TFAP2C,SLC39A1,ITGB4,FOXA1,B3GNT5,ETNK2,MET,PCDH1,ITGB6,ESRP2,ESRP1,THRB,KRT7,AGRN,EFNA5,SFN,YIPF6,PERP,HES1,TACSTD2,CDH1,LAMB3,DSG2,CLDN1,CTTN,SDC1,CARD10,WNT9A,JAG2,TACC2,OVOL2,…
GO:CC	plasma membrane region	GO:0098590	1.39376e-08	26.0964	7.85581	1248	4969	442	18911	KRT8,WWC1,CLDN4,BAIAP2,MAL2,PLPP2,PDGFB,EPCAM,PATJ,AIF1L,SCNN1A,MAP7,MET,EFNA5,TACSTD2,CDH1,DSG2,EPN3,CLDN1,CTTN,ATP1B1,TGFA,TJP1,PLEKHG6,MUC1,CLDN7,MARVELD2,SPIRE2,KRT19,SLC22A5,DSP,NCKAP1,SYT7,JUP,PARD6B,CACNG4,ITGA3,PLEK2,SPTBN2,ERBB3,PROM2,STX1A,SLC6A11,CLDN3,OCLN,EGFR,EPS8L1,EPPK1,PARD3,EPHA2,IQCE,STX3,RAB25,CXADR,EMP2,MYO6,DAGLA,SVIL,ADGRV1,RAC1,DST,CTNNA1,SLC2A1,SLC4A11,SCRIB,TMEM17,PRKCZ,…
HPA	endometrium 2	HPA:0170000	1.41308e-08	26.0766	7.84983	6550	1153	510	18911	TSPAN15,KIAA1522,KRT8,TUFT1,KRT18,BAIAP2L1,HSPA1A,HSPA1B,WWC1,PPL,DDR1,CLDN4,BAIAP2,TLCD1,PIP4K2C,FAM83H,CHMP4C,PLEKHG3,PDGFB,RASEF,PRXL2A,CCNJL,MYO5B,EPCAM,SDC4,ARHGEF16,EPB41L1,GRB7,F11R,WFDC2,PATJ,TNFRSF21,TSKU,AIF1L,MYH14,CYB561,TSPAN6,ANKEF1,ITGB4,CDS1,KIAA1671,SCNN1A,MAP7,ETNK2,VAPB,MET,SOWAHC,PCDH1,CGN,MAP3K9,ITGB6,ESRP1,KRT7,AGRN,EFNA5,CEP170B,TACSTD2,CDH1,LAMB3,DSG2,CLDN1,CTTN,BCAP31,RCE…
GO:BP	epithelial cell development	GO:0002064	1.41957e-08	26.07	7.84784	224	4953	108	18911	PDGFB,F11R,WNT7B,FOXA1,MET,SFN,YIPF6,CLDN1,SDC1,TJP1,PLS1,KLF5,MARVELD2,GRHL2,ID1,KDF1,BFSP1,CLDN3,EPHA2,SPINT2,RAB25,F2RL1,SCRIB,RDX,ST14,TJP3,TMEM79,SPDEF,PROC,AFDN,YAP1,RAB13,SLC9A3R1,SRC,GSTM3,ARHGEF26,EXPH5,CST3,EPB41L5,TFCP2L1,JAG1,RHEB,FOSL2,MYO7A,PSAP,LRTOMT,LAMB2,SOX9,DLL1,CDH5,WHRN,FOXJ1,TJP2,COL18A1,SHROOM3,WNT7A,FLNB,VSIG1,SLITRK6,BAD,LHFPL5,DACT2,HYDIN,RARG,RILPL1,PAX6,TMC1,B4GALT1,T…
GO:BP	desmosome organization	GO:0002934	1.51028e-08	25.9806	7.82094	10	244	7	18911	PKP3,PERP,DSG2,GRHL1,PKP2,DSP,JUP
MIRNA	hsa-miR-335-5p	MIRNA:hsa-miR-335-5p	1.67163e-08	25.8342	7.77686	2491	2357	428	18911	TSPAN15,KIAA1522,LAMA5,EFNA1,SOX13,HSPA1A,HSPA1B,PPL,DDR1,CLDN4,MAL2,P2RY2,PLEKHG3,GRB7,F11R,WNT7B,CYB561,ITGB4,CDS1,LLGL2,B3GNT5,PON3,LYPD3,ITGB6,ESRP1,ACOT4,EFNA5,TACSTD2,TMEM30B,CLDN1,SYT12,WNT9A,C6ORF141,JAG2,SLPI,TACC2,ABCC3,CLMN,TMPRSS13,GPRC5C,DSC2,KRT4,REPS2,INHBB,MUC1,CLDN7,CXCL16,G6PD,TBC1D8,CTNND1,B3GNT3,C11ORF52,CDH3,KRT19,GPR87,GCNT2,CUEDC1,SEMA4B,JUP,KDF1,PARD6B,CACNG4,WFDC3,IRF6,MI…
TF	Factor: Sp1; motif: GGGGCGGGGT	TF:M00008	1.71638e-08	25.7961	7.76539	9652	3600	2108	18911	TSPAN15,KIAA1522,CTSV,LAMA5,KRT8,CELSR1,TUFT1,SHTN1,TMEM184A,KRT80,KRT18,BAIAP2L1,EFNA1,RHPN2,SOX13,HSPA1A,MLF1,HSPA1B,DDX27,PPL,DDR1,FAM241B,BAIAP2,MAL2,TLCD1,PLPP2,PIP4K2C,FAM83H,IGSF3,P2RY2,BCAM,PKP3,CHMP4C,RAB5IF,SPR,MYO5B,EEF1A2,EPCAM,SDC4,ARHGEF16,NHLRC1,PAK4,GRB7,F11R,WFDC2,PTPRF,PATJ,WNT7B,KRT15,AIF1L,MYH14,PIGT,LAPTM4B,ANKEF1,TFAP2C,SLC39A1,CDS1,LLGL2,FOXA1,B3GNT5,MAP7,VWA1,IQANK1,KLC3,V…
TF	Factor: Egr-1; motif: GCGCATGCG; match class: 1	TF:M04869_1	1.71913e-08	25.7937	7.76469	9859	3311	1982	18911	TSPAN15,KIAA1522,LAMA5,CELSR1,TUFT1,SHTN1,RIPK4,BAIAP2L1,EFNA1,RHPN2,HSPA1A,MLF1,DDX27,PPL,BAIAP2,MAL2,TLCD1,PLPP2,PIP4K2C,FAM83H,IGSF3,PKP3,PLEKHG3,RAB5IF,PDGFB,RASEF,CCNJL,SPR,MYO5B,EEF1A2,EPCAM,SDC4,ARHGEF16,NHLRC1,EPB41L1,PAK4,WFDC2,PTPRF,PATJ,TNFRSF21,WNT7B,AIF1L,TSPAN6,PIGT,LAPTM4B,TFAP2C,SLC39A1,LLGL2,FOXA1,MAP7,VWA1,ETNK2,IQANK1,KLC3,VAPB,TSPAN13,MET,SOWAHC,PCDH1,C19ORF33,MAP3K9,ESRP2,ESR…
TF	Factor: AP-2beta; motif: NSCCNNNGGSN; match class: 1	TF:M11478_1	1.73584e-08	25.7798	7.76049	7711	3232	1559	18911	TSPAN15,KIAA1522,CTSV,LAMA5,KRT8,CELSR1,TMEM184A,KRT18,EFNA1,RHPN2,PPL,MAP3K13,FAM241B,BAIAP2,MAL2,TLCD1,PLPP2,PIP4K2C,FAM83H,IGSF3,P2RY2,BCAM,RAB5IF,SPR,EEF1A2,EPCAM,SDC4,ARHGEF16,GRB7,PTPRF,PATJ,TNFRSF21,WNT7B,KRT15,TSKU,AIF1L,MYH14,CYB561,TSPAN6,PIGT,TFAP2C,ITGB4,LLGL2,FOXA1,B3GNT5,MAP7,VWA1,IQANK1,KLC3,MET,SOWAHC,PCDH1,C19ORF33,LYPD3,CGN,MAP3K9,ESRP2,ESRP1,STARD10,ACOT4,KRT7,AGRN,EFNA5,KIAA08…
TF	Factor: KLF15; motif: RGGGMGGRGNNGGGGGNGG	TF:M09968	1.77792e-08	25.7452	7.75009	3034	1684	391	18911	LAMA5,KRT8,CELSR1,TMEM184A,KRT18,BAIAP2L1,EFNA1,RHPN2,WWC1,BAIAP2,PLPP2,FAM83H,IGSF3,BCAM,CCNJL,F11R,PATJ,AIF1L,TSPAN6,ANKEF1,LLGL2,ETNK2,IQANK1,KLC3,PCDH1,CGN,MAP3K9,ESRP1,KRT7,AGRN,SFN,ST6GALNAC2,CEP170B,HES1,CTTN,BCAP31,RCE1,SYT12,CARD10,WNT9A,JAG2,OVOL2,ATP1B1,CLMN,CMTM4,RGL3,STAU1,SLC2A4RG,PPP1R26,RAP1GAP,MAB21L4,TFAP2A,MPP3,PKP2,KLF5,MARVELD2,G6PD,TBC1D8,ADRM1,SPIRE2,NANOS1,SYT7,CUEDC1,SEMA…
GO:CC	actin cytoskeleton	GO:0015629	1.95789e-08	25.6061	7.70821	507	637	53	18911	BAIAP2L1,BAIAP2,MYO5B,AIF1L,MYH14,LLGL2,CGN,CDH1,CTTN,ZNF185,TJP1,CAPN2,PLS1,WASL,KRT19,LAD1,NCKAP1,JUP,MISP,SPTBN2,STX1A,BCAR1,COBL,LIMCH1,MICALL2,PXN,ARPC1A,ARHGEF5,MLPH,CDC42EP4,MYO6,SVIL,RAC1,CDC42BPB,TNNT1,ESPN,CTNNA1,SLC2A1,CARMIL1,PRKCZ,SRCIN1,YES1,RTKN,DSTN,MYO5C,ARHGAP32,ANLN,MYZAP,PLS3,PTPN12,MARCKS,OPHN1,RDX
TF	Factor: E2F-4; motif: NGGCGGGAARN; match class: 1	TF:M07084_1	1.97649e-08	25.5925	7.70411	5249	1677	612	18911	KIAA1522,CTSV,LAMA5,CELSR1,SHTN1,KRT80,BAIAP2L1,RHPN2,DDX27,WWC1,BAIAP2,MAL2,TLCD1,PLPP2,PIP4K2C,BCAM,PDGFB,SPR,ELF3,MYO5B,EEF1A2,EPCAM,ARHGEF16,EPB41L1,PAK4,GRB7,WFDC2,PTPRF,WNT7B,AIF1L,MYH14,TSPAN6,TFAP2C,SLC39A1,CDS1,LLGL2,FOXA1,B3GNT5,MAP7,PON3,ETNK2,KLC3,VAPB,SOWAHC,PCDH1,C19ORF33,ESRP2,STARD10,ACOT4,KRT7,AGRN,EFNA5,ST6GALNAC2,CEP170B,HES1,TACSTD2,TMEM54,DSG2,RCE1,SDC1,FNBP1L,SLC25A13,CARD10…
TF	Factor: TFAP2A; motif: NGCCCYNNGGGCN; match class: 1	TF:M04148_1	2.44548e-08	25.2853	7.61164	9217	2869	1635	18911	TSPAN15,KIAA1522,LAMA5,KRT8,CELSR1,TUFT1,SHTN1,RIPK4,TMEM184A,KRT18,BAIAP2L1,EFNA1,RHPN2,SOX13,WWC1,PPL,DDR1,CLDN4,FAM241B,BAIAP2,ADGRG1,MAL2,TLCD1,PLPP2,PIP4K2C,FAM83H,IGSF3,P2RY2,BCAM,PKP3,PLEKHG3,RAB5IF,PDGFB,RASEF,CCNJL,SPR,ELF3,MYO5B,EEF1A2,EPCAM,SDC4,ARHGEF16,PAK4,GRB7,PTPRF,PATJ,TNFRSF21,WNT7B,KRT15,AIF1L,MYH14,ARHGAP39,CYB561,TFAP2C,SLC39A1,ITGB4,LLGL2,FOXA1,KIAA1671,B3GNT5,MAP7,VWA1,PON3…
GO:BP	cell development	GO:0048468	2.53377e-08	25.2341	7.59623	2106	1410	243	18911	LAMA5,KRT8,SHTN1,EFNA1,MAP3K13,DDR1,BAIAP2,PDGFB,SDC4,PAK4,GRB7,F11R,PTPRF,TNFRSF21,WNT7B,TSKU,FOXA1,MET,THRB,AGRN,EFNA5,SFN,YIPF6,HES1,TACSTD2,CDH1,LAMB3,CLDN1,CTTN,SDC1,OVOL2,CLMN,LSR,TJP1,SIX4,RAP1GAP,PLS1,INHBB,WASL,LAMC2,KLF5,MARVELD2,G6PD,AURKA,KRT19,GRHL2,ID1,YTHDF1,DLG5,NANOS1,LMNA,PLK2,NCKAP1,SPINT1,SEMA4B,KDF1,BFSP1,PARD6B,ITGA3,RASSF10,IRF6,SPTBN2,LAMA3,CLDN3,EGFR,LRP5,RYK,SYT17,COBL,I…
GO:BP	localization of cell	GO:0051674	2.70283e-08	25.141	7.56818	1667	533	103	18911	LAMA5,CELSR1,SHTN1,EFNA1,WWC1,DDR1,CLDN4,ADGRG1,FAM83H,PDGFB,EPCAM,SDC4,ARHGEF16,PAK4,GRB7,F11R,PTPRF,ITGB4,MET,ITGB6,HES1,TACSTD2,CDH1,LAMB3,S100A2,CLDN1,CTTN,SDC1,CARD10,OVOL2,ATP1B1,TJP1,MARVELD3,SIX4,WASL,LAMC2,CXCL16,ID1,DLG5,NANOS1,LMNA,PLK2,GCNT2,NCKAP1,SEMA4B,JUP,PARD6B,ITGA3,GIPC1,MISP,ERBB3,LAMA3,CLDN3,BCAR1,EGFR,LRP5,OSGIN1,EPPK1,FAM83D,SEMA3E,LIMCH1,PTK6,PXN,EPHA2,PTPRK,L1CAM,SPINT2,R…
GO:BP	cell motility	GO:0048870	2.70283e-08	25.141	7.56818	1667	533	103	18911	LAMA5,CELSR1,SHTN1,EFNA1,WWC1,DDR1,CLDN4,ADGRG1,FAM83H,PDGFB,EPCAM,SDC4,ARHGEF16,PAK4,GRB7,F11R,PTPRF,ITGB4,MET,ITGB6,HES1,TACSTD2,CDH1,LAMB3,S100A2,CLDN1,CTTN,SDC1,CARD10,OVOL2,ATP1B1,TJP1,MARVELD3,SIX4,WASL,LAMC2,CXCL16,ID1,DLG5,NANOS1,LMNA,PLK2,GCNT2,NCKAP1,SEMA4B,JUP,PARD6B,ITGA3,GIPC1,MISP,ERBB3,LAMA3,CLDN3,BCAR1,EGFR,LRP5,OSGIN1,EPPK1,FAM83D,SEMA3E,LIMCH1,PTK6,PXN,EPHA2,PTPRK,L1CAM,SPINT2,R…
TF	Factor: E2F-2; motif: GCGCGCGCGYW	TF:M11531	2.86507e-08	25.0569	7.54287	12704	2873	2175	18911	TSPAN15,KIAA1522,CTSV,LAMA5,KRT8,CELSR1,TUFT1,SHTN1,RIPK4,TMEM184A,KRT18,BAIAP2L1,EFNA1,RHPN2,HSPA1A,HSPA1B,WWC1,PPL,CLDN4,FAM241B,BAIAP2,MAL2,TOM1L1,TLCD1,PLPP2,PIP4K2C,FAM83H,IGSF3,P2RY2,BCAM,PKP3,PLEKHG3,RAB5IF,PDGFB,RASEF,CCNJL,SPR,MYO5B,EEF1A2,EPCAM,SDC4,ARHGEF16,NHLRC1,EPB41L1,PAK4,F11R,WFDC2,PTPRF,PATJ,TNFRSF21,WNT7B,AIF1L,MYH14,ARHGAP39,CYB561,PIGT,LAPTM4B,ANKEF1,TFAP2C,SLC39A1,CDS1,LLGL2…
GO:BP	cell migration	GO:0016477	3.13286e-08	24.9279	7.50406	1497	524	95	18911	LAMA5,CELSR1,SHTN1,EFNA1,WWC1,DDR1,CLDN4,ADGRG1,FAM83H,PDGFB,EPCAM,SDC4,ARHGEF16,PAK4,GRB7,F11R,PTPRF,ITGB4,MET,ITGB6,HES1,TACSTD2,CDH1,LAMB3,S100A2,CLDN1,CTTN,SDC1,CARD10,OVOL2,ATP1B1,TJP1,MARVELD3,SIX4,WASL,LAMC2,CXCL16,ID1,DLG5,NANOS1,LMNA,PLK2,GCNT2,NCKAP1,SEMA4B,JUP,PARD6B,ITGA3,GIPC1,MISP,LAMA3,CLDN3,BCAR1,EGFR,LRP5,OSGIN1,EPPK1,FAM83D,SEMA3E,LIMCH1,PTK6,PXN,EPHA2,PTPRK,L1CAM,RAB25,CXADR,DU…
TF	Factor: Egr-1; motif: GCGGGGGCGG; match class: 1	TF:M01873_1	3.14215e-08	24.9237	7.50277	2598	4827	834	18911	TSPAN15,KIAA1522,PPL,FAM241B,BAIAP2,TLCD1,PLPP2,FAM83H,IGSF3,PDGFB,EEF1A2,SDC4,ARHGEF16,PAK4,PTPRF,PATJ,CYB561,ANKEF1,B3GNT5,VWA1,ETNK2,IQANK1,SOWAHC,PCDH1,AGRN,CEP170B,CDH1,JAG2,ATP1B1,CLMN,PTPN3,CDC42BPG,TJP1,CMTM4,SLC2A4RG,GRHL1,PPP1R26,RAP1GAP,REPS2,INHBB,MUC1,PKP2,G6PD,UPP1,NANOS1,DSP,LAD1,NCKAP1,SPINT1,PARD6B,PANX2,TMEM40,NUDT14,PLEKHA7,ERRFI1,MCOLN3,SLC6A11,OCLN,BCAR1,PPFIA1,RYK,HID1,IL13R…
TF	Factor: MOVO-B; motif: GNGGGGG	TF:M01104	3.41522e-08	24.8034	7.46658	9868	2374	1449	18911	KIAA1522,CTSV,LAMA5,KRT8,CELSR1,TUFT1,RIPK4,TMEM184A,KRT18,BAIAP2L1,EFNA1,RHPN2,HSPA1A,HSPA1B,WWC1,PPL,CLDN4,FAM241B,BAIAP2,MAL2,TOM1L1,TLCD1,PLPP2,PIP4K2C,FAM83H,IGSF3,P2RY2,BCAM,PKP3,PLEKHG3,PDGFB,RASEF,CCNJL,SPR,MYO5B,EEF1A2,EPCAM,SDC4,ARHGEF16,PAK4,PTPRF,PATJ,TNFRSF21,WNT7B,MYH14,CYB561,ANKEF1,TFAP2C,CDS1,LLGL2,FOXA1,KIAA1671,B3GNT5,SCNN1A,MAP7,VWA1,ETNK2,IQANK1,KLC3,VAPB,TSPAN13,MET,SOWAHC,P…
TF	Factor: SP1:SP3; motif: CCSCCCCCYCC; match class: 1	TF:M01219_1	3.56103e-08	24.7431	7.44842	2846	3378	664	18911	TSPAN15,KIAA1522,LAMA5,CELSR1,BAIAP2L1,HSPA1A,PPL,BAIAP2,MAL2,PLPP2,FAM83H,PDGFB,RASEF,MYO5B,EEF1A2,ARHGEF16,PAK4,PTPRF,MYH14,ANKEF1,LLGL2,IQANK1,PCDH1,MAP3K9,AGRN,CEP170B,TACSTD2,TMEM54,CTTN,BCAP31,SDC1,CARD10,WNT9A,JAG2,OVOL2,ATP1B1,PTPN3,CDC42BPG,TJP1,CMTM4,SHB,STAU1,SLC2A4RG,GRHL1,PPP1R26,RAP1GAP,CLDN7,PKP2,KLF5,G6PD,TBC1D8,CTNND1,SPIRE2,KRT19,UPP1,DLG5,NCKAP1,PARD6B,CACNG4,PANX2,TMEM40,NUDT1…
TF	Factor: E2F-4; motif: NGGCGGGAARN	TF:M07084	3.56814e-08	24.7403	7.44756	10376	1237	827	18911	TSPAN15,KIAA1522,CTSV,LAMA5,CELSR1,SHTN1,RIPK4,KRT80,BAIAP2L1,RHPN2,MLF1,DDX27,WWC1,PPL,DDR1,CLDN4,FAM241B,BAIAP2,ADGRG1,MAL2,TLCD1,PLPP2,PIP4K2C,FAM83H,P2RY2,BCAM,PKP3,CHMP4C,PLEKHG3,RAB5IF,PDGFB,RASEF,SPR,ELF3,MYO5B,EEF1A2,EPCAM,SDC4,ARHGEF16,NHLRC1,EPB41L1,PAK4,GRB7,F11R,WFDC2,PTPRF,PATJ,WNT7B,AIF1L,MYH14,TSPAN6,PIGT,ANKEF1,TFAP2C,SLC39A1,CDS1,LLGL2,FOXA1,B3GNT5,MAP7,VWA1,PON3,ETNK2,IQANK1,KLC…
GO:MF	actin binding	GO:0003779	3.92158e-08	24.604	7.40654	439	2317	103	18911	SHTN1,BAIAP2L1,MYO5B,EPB41L1,AIF1L,MYH14,CGN,CTTN,ZNF185,CLMN,SSH3,PLS1,WASL,SPIRE2,GIPC1,MISP,SPTBN2,EGFR,EPS8L1,COBL,PLEC,LIMCH1,MICALL2,HOOK1,FHDC1,ARPC1A,MLPH,ANXA8,MYO6,SVIL,DST,ESPN,CTNNA1,CAMSAP3,DSTN,MYO5C,ANLN,DAG1,PLS3,EPS8L2,MARCKS,OPHN1,RDX,AJUBA,PFN2,PTK2,CORO2A,WIPF3,SPIRE1,MYO10,AFDN,FERMT1,DMTN,IMPACT,PPP1R9A,EPS8,GAS2L3,PFN4,RUSC1,TNS4,ACTN4,NEBL,IQGAP3,ENAH,ACTR3C,ABLIM1,INF2,CO…
GO:BP	cell morphogenesis	GO:0000902	3.95431e-08	24.592	7.40293	1053	2215	197	18911	LAMA5,SHTN1,EFNA1,MAP3K13,DDR1,CLDN4,BAIAP2,GRB7,F11R,WNT7B,TSKU,MYH14,MET,ITGB6,EFNA5,HES1,TACSTD2,LAMB3,CTTN,RAP1GAP,PLS1,WASL,LAMC2,AURKA,GRHL2,ID1,YTHDF1,NCKAP1,SEMA4B,PARD6B,SPTBN2,LAMA3,CLDN3,EGFR,RYK,SYT17,COBL,IGSF9,SEMA3E,PARD3,MICALL2,PXN,EPHA2,OBSL1,L1CAM,SPINT2,RAB25,LAMB1,CDC42EP4,RHOD,CLU,RAC1,CARMIL1,RHOBTB3,SCRIB,PRKCZ,APP,SRCIN1,ECT2,S100A10,ARHGEF28,SHANK2,DAG1,LMTK2,ERBB2,NTF4,…
GO:BP	locomotion	GO:0040011	4.26423e-08	24.4831	7.37016	1864	533	110	18911	LAMA5,CELSR1,SHTN1,EFNA1,WWC1,DDR1,CLDN4,ADGRG1,FAM83H,PDGFB,EPCAM,SDC4,ARHGEF16,PAK4,GRB7,F11R,PTPRF,ITGB4,MET,ITGB6,EFNA5,HES1,TACSTD2,CDH1,LAMB3,S100A2,CLDN1,CTTN,SDC1,CARD10,OVOL2,ATP1B1,TJP1,MARVELD3,SIX4,RAP1GAP,WASL,LAMC2,CXCL16,ID1,YTHDF1,DLG5,NANOS1,LMNA,PLK2,GCNT2,NCKAP1,SEMA4B,JUP,PARD6B,ITGA3,GIPC1,MISP,SPTBN2,ERBB3,LAMA3,CLDN3,BCAR1,EGFR,LRP5,RYK,OSGIN1,IGSF9,EPPK1,FAM83D,SEMA3E,LIMC…
TF	Factor: TF3C-beta; motif: CCNGGAGGGCTTCCTGGAGGAG; match class: 1	TF:M04863_1	4.34625e-08	24.4557	7.36189	8189	3630	1837	18911	TSPAN15,KIAA1522,CTSV,LAMA5,KRT8,CELSR1,RIPK4,TMEM184A,KRT80,KRT18,BAIAP2L1,RHPN2,SOX13,HSPA1A,HSPA1B,WWC1,DDR1,FAM241B,BAIAP2,ADGRG1,MAL2,TLCD1,PIP4K2C,IGSF3,P2RY2,BCAM,PLEKHG3,RAB5IF,RASEF,MYO5B,EEF1A2,EPCAM,SDC4,ARHGEF16,NHLRC1,EPB41L1,GRB7,PTPRF,PATJ,TNFRSF21,WNT7B,KRT15,AIF1L,MYH14,ARHGAP39,CYB561,LAPTM4B,ANKEF1,TFAP2C,ITGB4,CDS1,LLGL2,FOXA1,KIAA1671,B3GNT5,SCNN1A,VWA1,ETNK2,KLC3,SOWAHC,C19O…
TF	Factor: GCMa:Erg; motif: ATGCGGGCGGAARKG; match class: 1	TF:M08487_1	4.39285e-08	24.4403	7.35725	8427	2863	1505	18911	CTSV,LAMA5,CELSR1,RIPK4,TMEM184A,EFNA1,RHPN2,SOX13,HSPA1A,DDX27,WWC1,PPL,MAP3K13,CLDN4,FAM241B,BAIAP2,TOM1L1,TLCD1,PLPP2,FAM83H,BCAM,PKP3,PLEKHG3,RAB5IF,PDGFB,SPR,MYO5B,EEF1A2,EPCAM,SDC4,ARHGEF16,GRB7,PTPRF,PATJ,TNFRSF21,KRT15,AIF1L,MYH14,ARHGAP39,CYB561,TSPAN6,PIGT,LAPTM4B,TFAP2C,SLC39A1,CDS1,LLGL2,FOXA1,KIAA1671,B3GNT5,SCNN1A,MAP7,VWA1,ETNK2,IQANK1,MET,SOWAHC,PCDH1,C19ORF33,MAP3K9,ESRP2,ESRP1,A…
HPA	endometrium 2; glandular cells[‚â•Low]	HPA:0170051	4.57978e-08	24.3801	7.33916	6365	1153	495	18911	TSPAN15,KIAA1522,KRT8,TUFT1,KRT18,BAIAP2L1,HSPA1A,HSPA1B,WWC1,PPL,DDR1,CLDN4,BAIAP2,TLCD1,PIP4K2C,FAM83H,PLEKHG3,PDGFB,RASEF,PRXL2A,CCNJL,MYO5B,EPCAM,SDC4,ARHGEF16,EPB41L1,GRB7,F11R,WFDC2,PATJ,TNFRSF21,TSKU,AIF1L,MYH14,CYB561,TSPAN6,ANKEF1,ITGB4,CDS1,KIAA1671,SCNN1A,MAP7,ETNK2,VAPB,MET,SOWAHC,PCDH1,CGN,MAP3K9,ITGB6,ESRP1,KRT7,AGRN,EFNA5,CEP170B,TACSTD2,CDH1,LAMB3,DSG2,CLDN1,CTTN,BCAP31,RCE1,FNBP1…
HP	Hyperkeratosis	HP:0000962	4.58474e-08	24.3786	7.33869	236	4026	96	18911	ITGB4,PERP,LAMB3,DSG2,DSC2,LAMC2,CDH3,GRHL2,LMNA,DSP,JUP,KDF1,LAMA3,NECTIN4,PLEC,ALDH3A2,CARD14,NSDHL,POFUT1,SULT2B1,GJB3,PSEN2,ST14,KRT86,KRT17,BAG3,KRT6A,FGFR2,IL17RC,FERMT1,SLCO2A1,PSENEN,KRT83,KRT81,KRT16,CAST,NEBL,EXPH5,COL17A1,KRT13,KRT5,DOLK,GJB2,CAP2,NECTIN1,PKP1,WNT10A,ZMPSTE24,GBA,RHBDF2,ABCA12,NIPAL4,GJB6,KITLG,FHL2,ATP2A2,DNAJC21,ZNF750,TNNT2,SLURP1,SDHA,NEU1,CLEC7A,HPGD,TPM1,AQP5,KRT…
TF	Factor: ctcf; motif: CCRSCAGGGGGCGCN	TF:M10426	4.597e-08	24.3747	7.33753	8909	3508	1915	18911	KIAA1522,CTSV,LAMA5,CELSR1,SHTN1,RIPK4,TMEM184A,KRT80,BAIAP2L1,SOX13,WWC1,PPL,CLDN4,FAM241B,BAIAP2,MAL2,TLCD1,PLPP2,PIP4K2C,FAM83H,IGSF3,P2RY2,BCAM,PKP3,PLEKHG3,RAB5IF,PDGFB,RASEF,CCNJL,SPR,MYO5B,EEF1A2,EPCAM,ARHGEF16,NHLRC1,WFDC2,PTPRF,PATJ,TNFRSF21,WNT7B,TSKU,MYH14,TSPAN6,LAPTM4B,ANKEF1,SLC39A1,ITGB4,CDS1,LLGL2,FOXA1,B3GNT5,MAP7,VWA1,PON3,ETNK2,IQANK1,VAPB,TSPAN13,SOWAHC,PCDH1,CGN,MAP3K9,ESRP2,…
TF	Factor: AP-2gamma; motif: GCCYNCRGSN; match class: 1	TF:M03811_1	4.63112e-08	24.3641	7.33431	3678	2862	720	18911	KIAA1522,CTSV,CELSR1,SHTN1,EFNA1,RHPN2,PPL,DDR1,PKP3,PLEKHG3,PDGFB,MYO5B,EEF1A2,WFDC2,PATJ,WNT7B,ARHGAP39,CYB561,PIGT,LAPTM4B,SLC39A1,ITGB4,LLGL2,ETNK2,ACOT4,KRT7,KIAA0895,HES1,TMEM54,TRIM47,CLDN9,BCAP31,RTL8A,RCE1,SDC1,SYT12,FNBP1L,CARD10,TACC2,GET4,PTPN3,TJP1,CMTM4,GRAMD2A,MOCS3,STAU1,SLC2A4RG,EPHX1,CAPN2,PLEKHG6,MAB21L4,TFAP2A,PKP2,KLF5,CITED4,TBC1D8,KRT19,GPAT3,PLK2,CUEDC1,ACP6,PANX2,ABHD11,W…
TF	Factor: EKLF; motif: NGGGYGKGGCNNGG	TF:M09969	4.86702e-08	24.2924	7.31274	4427	1634	517	18911	CTSV,KRT8,CELSR1,SHTN1,RIPK4,KRT80,KRT18,EFNA1,PPL,BAIAP2,TOM1L1,TLCD1,PLPP2,PIP4K2C,FAM83H,IGSF3,BCAM,RASEF,MYO5B,EEF1A2,EPCAM,SDC4,GRB7,F11R,WFDC2,PATJ,WNT7B,KRT15,CYB561,ITGB4,LLGL2,B3GNT5,VWA1,PON3,IQANK1,KLC3,VAPB,TSPAN13,MET,SOWAHC,C19ORF33,LYPD3,CGN,MAP3K9,ESRP1,AGRN,SFN,ST6GALNAC2,CEP170B,LAMB3,DSG2,TRIM47,CTTN,BCAP31,PRSS22,RCE1,FNBP1L,CARD10,WNT9A,JAG2,OVOL2,CLMN,SSH3,CDC42BPG,TJP1,CMTM…
TF	Factor: KLF14; motif: NRCCACRCCCMCN	TF:M12183	5.16221e-08	24.2074	7.28716	6629	2842	1202	18911	TSPAN15,CTSV,KRT8,CELSR1,TUFT1,SHTN1,RIPK4,KRT18,BAIAP2L1,WWC1,PPL,DDR1,BAIAP2,TLCD1,PLPP2,PIP4K2C,FAM83H,IGSF3,P2RY2,BCAM,PKP3,CCNJL,MYO5B,EEF1A2,ARHGEF16,EPB41L1,PAK4,GRB7,WFDC2,PTPRF,PATJ,MYH14,CYB561,PIGT,LAPTM4B,ANKEF1,ITGB4,CDS1,LLGL2,B3GNT5,VWA1,PON3,ETNK2,IQANK1,KLC3,TSPAN13,MET,SOWAHC,PCDH1,C19ORF33,CGN,MAP3K9,PMEPA1,ESRP2,ACOT4,AGRN,SFN,KIAA0895,CEP170B,HES1,CTTN,BCAP31,SDC1,FNBP1L,SLC2…
TF	Factor: TF3C-beta; motif: CCNGGAGGGCTTCCTGGAGGAG	TF:M04863	5.16975e-08	24.2053	7.28653	12949	3111	2400	18911	TSPAN15,KIAA1522,CTSV,LAMA5,KRT8,CELSR1,SHTN1,RIPK4,TMEM184A,KRT80,KRT18,BAIAP2L1,EFNA1,RHPN2,SOX13,HSPA1A,HSPA1B,DDX27,WWC1,PPL,DDR1,CLDN4,FAM241B,BAIAP2,ADGRG1,MAL2,TLCD1,PLPP2,PIP4K2C,IGSF3,P2RY2,BCAM,PKP3,CHMP4C,PLEKHG3,RAB5IF,PDGFB,RASEF,PRXL2A,SPR,ELF3,MYO5B,EEF1A2,EPCAM,SDC4,ARHGEF16,NHLRC1,EPB41L1,GRB7,WFDC2,PTPRF,PATJ,TNFRSF21,WNT7B,KRT15,AIF1L,MYH14,ARHGAP39,CYB561,LAPTM4B,ANKEF1,TFAP2C…
GO:CC	organelle subcompartment	GO:0031984	6.35987e-08	23.9064	7.19655	1720	4317	526	18911	TOM1L1,PLPP2,PDGFB,PIGT,SLC39A1,CDS1,B3GNT5,VAPB,PMEPA1,YIPF6,ST6GALNAC2,TMEM132A,CDH1,AP1M2,BCAP31,RCE1,TGFA,GRAMD2A,HM13,RAP1GAP,EPHX1,DPM1,B3GNT3,GPAT3,GCNT2,SYS1,SPTSSB,SEZ6L2,POR,PCSK1N,EGFR,HID1,SYT17,ALDH3A2,NSDHL,GOLT1A,TMEM189,ATP9A,PTGES,LFNG,PIGU,EMP2,GALNT3,ASPH,RAC1,DST,SLC2A1,CNIH4,CYP1A1,RHOBTB3,ACSL3,DPY30,ZDHHC9,ELOVL7,B3GALNT1,APP,DHCR24,FOLR1,PDCD6,SLC35A2,ARHGAP32,GPR37,MALL,R…
TF	Factor: TFAP2A; motif: NGCCCYNNGGGCN	TF:M04148	6.56811e-08	23.8599	7.18256	9632	2869	1696	18911	TSPAN15,KIAA1522,LAMA5,KRT8,CELSR1,TUFT1,SHTN1,RIPK4,TMEM184A,KRT18,BAIAP2L1,EFNA1,RHPN2,SOX13,WWC1,PPL,DDR1,CLDN4,FAM241B,BAIAP2,ADGRG1,MAL2,TLCD1,PLPP2,PIP4K2C,FAM83H,IGSF3,P2RY2,BCAM,PKP3,PLEKHG3,RAB5IF,PDGFB,RASEF,CCNJL,SPR,ELF3,MYO5B,EEF1A2,EPCAM,SDC4,ARHGEF16,PAK4,GRB7,PTPRF,PATJ,TNFRSF21,WNT7B,KRT15,AIF1L,MYH14,ARHGAP39,CYB561,TFAP2C,SLC39A1,ITGB4,LLGL2,FOXA1,KIAA1671,B3GNT5,MAP7,VWA1,PON3…
TF	Factor: ctcf; motif: CCNCNAGRKGGCRSTN	TF:M07249	7.2017e-08	23.7271	7.14256	6430	4264	1708	18911	KIAA1522,CTSV,CELSR1,TMEM184A,KRT80,BAIAP2L1,SOX13,WWC1,PPL,FAM241B,BAIAP2,ADGRG1,PLPP2,FAM83H,RASEF,SPR,ELF3,MYO5B,EPCAM,ARHGEF16,NHLRC1,PAK4,GRB7,F11R,WFDC2,PTPRF,PATJ,TNFRSF21,WNT7B,CYB561,LAPTM4B,TFAP2C,CDS1,LLGL2,FOXA1,KIAA1671,B3GNT5,SCNN1A,MAP7,VWA1,ETNK2,IQANK1,SOWAHC,PCDH1,CGN,MAP3K9,ESRP1,STARD10,KRT7,AGRN,TRIM16L,EFNA5,ST6GALNAC2,PERP,TMEM132A,CEP170B,HES1,TRIM47,CLDN9,CLDN1,BCAP31,PRS…
HPA	tonsil	HPA:0600000	7.50292e-08	23.668	7.12477	7411	706	362	18911	TSPAN15,KIAA1522,KRT8,TUFT1,SHTN1,RIPK4,BAIAP2L1,HSPA1A,HSPA1B,WWC1,PPL,DDR1,CLDN4,FAM241B,BAIAP2,TLCD1,PIP4K2C,FAM83H,PKP3,CHMP4C,PLEKHG3,PDGFB,PRXL2A,CCNJL,ELF3,MYO5B,SDC4,ARHGEF16,EPB41L1,GRB7,F11R,PATJ,TNFRSF21,KRT15,TSKU,MYH14,CYB561,TSPAN6,ANKEF1,ITGB4,CDS1,FOXA1,KIAA1671,SCNN1A,MAP7,ETNK2,KLC3,VAPB,MET,SOWAHC,PCDH1,LYPD3,MAP3K9,ITGB6,ESRP1,ACOT4,AGRN,EFNA5,SFN,CPVL,TMEM132A,CEP170B,TACSTD2…
TF	Factor: LRF; motif: GGGGKYNNB	TF:M01100	8.76514e-08	23.4436	7.05724	7240	2132	1002	18911	TSPAN15,KIAA1522,CTSV,LAMA5,KRT8,CELSR1,TMEM184A,KRT80,KRT18,BAIAP2L1,SOX13,HSPA1A,WWC1,PPL,DDR1,FAM241B,BAIAP2,PLPP2,FAM83H,IGSF3,BCAM,PKP3,CHMP4C,PDGFB,RASEF,PRXL2A,CCNJL,MYO5B,EEF1A2,EPCAM,SDC4,NHLRC1,EPB41L1,GRB7,WFDC2,PTPRF,PATJ,MYH14,CYB561,TSPAN6,PIGT,SLC39A1,ITGB4,LLGL2,FOXA1,KIAA1671,B3GNT5,MAP7,PON3,ETNK2,IQANK1,KLC3,SOWAHC,PCDH1,C19ORF33,LYPD3,MAP3K9,ESRP2,STARD10,ACOT4,KRT7,AGRN,EFNA5…
TF	Factor: ZBP89; motif: CCCCKCCCCCNN	TF:M07397	9.53456e-08	23.3223	7.0207	6854	2359	1046	18911	KIAA1522,CTSV,LAMA5,KRT8,CELSR1,TMEM184A,KRT80,KRT18,BAIAP2L1,EFNA1,RHPN2,WWC1,PPL,CLDN4,BAIAP2,TOM1L1,TLCD1,PLPP2,PIP4K2C,FAM83H,IGSF3,P2RY2,BCAM,PKP3,CCNJL,MYO5B,EEF1A2,EPCAM,ARHGEF16,PAK4,GRB7,F11R,PTPRF,PATJ,MYH14,CYB561,PIGT,LAPTM4B,ANKEF1,SLC39A1,CDS1,LLGL2,FOXA1,B3GNT5,SCNN1A,VWA1,ETNK2,IQANK1,KLC3,TSPAN13,SOWAHC,PCDH1,C19ORF33,CGN,MAP3K9,ESRP2,ESRP1,KRT7,AGRN,ST6GALNAC2,CEP170B,HES1,TMEM5…
TF	Factor: WT1; motif: NGCGGGGGGGTSMMCYN; match class: 1	TF:M05327_1	9.64389e-08	23.3058	7.01575	1704	2854	369	18911	KIAA1522,KRT8,CELSR1,KRT18,WWC1,BAIAP2,PLPP2,SPR,PATJ,WNT7B,SCNN1A,ETNK2,MAP3K9,ESRP2,KRT7,AGRN,ST6GALNAC2,CEP170B,DSG2,BCAP31,CLMN,TJP1,SIX4,STAU1,SLC2A4RG,PPP1R26,RAP1GAP,REPS2,PKP2,MARVELD2,LAD1,SPINT1,CUEDC1,CACNG4,PANX2,ABHD11,TPD52L1,LAMA3,PLEKHA7,POR,BCAR1,LRP5,MRGBP,PARD3,FGF12,LIMCH1,DMRTA1,LRRC1,VWDE,C6ORF132,GRTP1,ARHGAP8,GNG4,PSMA7,PACSIN3,CNTNAP3,AGAP1,FAM174B,LFNG,PLEKHA5,MLPH,ASPH,…
TF	Factor: KLF14; motif: NRCCACRCCCMCN; match class: 1	TF:M12183_1	9.76532e-08	23.2878	7.01031	2396	3450	582	18911	TSPAN15,CELSR1,BAIAP2L1,WWC1,PPL,BAIAP2,TLCD1,FAM83H,PKP3,EEF1A2,ARHGEF16,PAK4,GRB7,PTPRF,PATJ,MYH14,ANKEF1,CDS1,VWA1,IQANK1,KLC3,SOWAHC,MAP3K9,AGRN,CEP170B,HES1,CTTN,BCAP31,SDC1,JAG2,LSR,CDC42BPG,PRPF6,TJP1,SHB,SLC2A4RG,GRHL1,PPP1R26,RAP1GAP,REPS2,INHBB,PKP2,CITED4,G6PD,TBC1D8,SPIRE2,NANOS1,DSP,CACNG4,PANX2,ABHD11,IRF6,TMEM40,ERBB3,NUDT14,PLEKHA7,POR,SLC6A11,PPFIA1,HID1,IL13RA1,CTSD,SYT17,COBL,P…
HP	Epidermal thickening	HP:0011368	1.02967e-07	23.2113	6.9873	356	4425	139	18911	ITGB4,ITGB6,PERP,LAMB3,DSG2,CLDN1,DSC2,LAMC2,CDH3,GRHL2,LMNA,DSP,JUP,KDF1,LAMA3,NECTIN4,PLEC,ALDH3A2,CARD14,NSDHL,POFUT1,SULT2B1,GJB3,PSEN2,ST14,KRT86,KRT17,RIN2,BAG3,KRT6A,FGFR2,FITM2,IL17RC,IL36RN,PPARG,FERMT1,SLCO2A1,PSENEN,KRT83,PEX13,KRT81,KRT16,CAST,NEBL,EXPH5,SPINK5,COL4A5,COL17A1,FGFR3,KRT13,KRT5,DOLK,GJB2,SEMA3A,BSCL2,CAP2,NECTIN1,PKP1,WNT10A,ZMPSTE24,NSMCE2,ANOS1,CAV1,AGPAT2,GBA,RHBDF2,…
HPA	endometrium 1; glandular cells[‚â•Low]	HPA:0160051	1.07611e-07	23.1477	6.96814	6446	1153	498	18911	TSPAN15,KIAA1522,KRT8,TUFT1,SHTN1,KRT18,BAIAP2L1,HSPA1A,HSPA1B,WWC1,PPL,DDR1,CLDN4,FAM241B,BAIAP2,TLCD1,PIP4K2C,FAM83H,PKP3,CHMP4C,PLEKHG3,PDGFB,RASEF,PRXL2A,CCNJL,ELF3,MYO5B,EPCAM,SDC4,ARHGEF16,GRB7,F11R,WFDC2,PATJ,TNFRSF21,TSKU,AIF1L,MYH14,CYB561,TSPAN6,ANKEF1,ITGB4,CDS1,KIAA1671,SCNN1A,MAP7,ETNK2,VAPB,MET,SOWAHC,PCDH1,CGN,MAP3K9,ITGB6,ESRP1,KRT7,EFNA5,CEP170B,CDH1,DSG2,CLDN1,CTTN,BCAP31,RCE1,F…
GO:BP	cell-matrix adhesion	GO:0007160	1.11718e-07	23.0936	6.95188	227	1367	48	18911	DDR1,BCAM,SDC4,ITGB4,LYPD3,ITGB6,EFNA5,CTTN,JUP,ITGA3,PPFIA1,SEMA3E,LIMCH1,PTPRK,L1CAM,DUSP3,EMP2,ADAM15,RHOD,RAC1,CAMSAP3,ITGB5,PHLDB2,PRKCZ,S100A10,DAG1,ITGA2,AJUBA,RIN2,PTK2,ITGB8,PIK3CB,WNT4,EPHA1,LYPD5,FERMT1,DMTN,SRC,CX3CL1,MSLN,NPNT,CEACAM6,EPB41L5,FUT1,COL17A1,HPSE,JAG1,ITGAV
GO:BP	actin filament organization	GO:0007015	1.12246e-07	23.0868	6.94983	433	606	44	18911	SHTN1,BAIAP2L1,BAIAP2,MYO5B,SDC4,F11R,AIF1L,MET,TACSTD2,CTTN,SSH3,TJP1,PLS1,WASL,SPIRE2,ID1,NCKAP1,SPTBN2,BCAR1,PPFIA1,COBL,LIMCH1,MICALL2,PXN,FHDC1,ARPC1A,ARHGEF5,F2RL1,EMP2,CDC42EP4,MYO6,RHOD,SVIL,RAC1,ESPN,CARMIL1,RHOBTB3,ITGB5,PHLDB2,S100A10,DSTN,MYO5C,PLS3,MARCKS
HPA	endometrium 1	HPA:0160000	1.48297e-07	22.685	6.82887	6674	1153	512	18911	TSPAN15,KIAA1522,KRT8,TUFT1,SHTN1,KRT18,BAIAP2L1,HSPA1A,HSPA1B,WWC1,PPL,DDR1,CLDN4,FAM241B,BAIAP2,TLCD1,PIP4K2C,FAM83H,PKP3,CHMP4C,PLEKHG3,PDGFB,RASEF,PRXL2A,CCNJL,ELF3,MYO5B,EPCAM,SDC4,ARHGEF16,GRB7,F11R,WFDC2,PATJ,TNFRSF21,TSKU,AIF1L,MYH14,CYB561,TSPAN6,ANKEF1,TFAP2C,ITGB4,CDS1,KIAA1671,SCNN1A,MAP7,ETNK2,VAPB,MET,SOWAHC,PCDH1,CGN,MAP3K9,ITGB6,ESRP1,KRT7,EFNA5,CEP170B,CDH1,LAMB3,DSG2,CLDN1,CTTN,…
GO:BP	multicellular organism development	GO:0007275	1.54596e-07	22.625	6.8108	5379	1879	692	18911	CTSV,LAMA5,KRT8,CELSR1,TUFT1,SHTN1,KRT80,KRT18,EFNA1,SOX13,HSPA1A,MLF1,HSPA1B,PPL,MAP3K13,DDR1,CLDN4,BAIAP2,ADGRG1,MAL2,FAM83H,IGSF3,PKP3,CHMP4C,PDGFB,PRXL2A,ELF3,EPCAM,SDC4,PAK4,GRB7,F11R,PTPRF,TNFRSF21,WNT7B,KRT15,TSKU,MYH14,PIGT,TFAP2C,SLC39A1,ITGB4,FOXA1,B3GNT5,ETNK2,MET,PCDH1,ITGB6,ESRP2,ESRP1,THRB,KRT7,AGRN,EFNA5,SFN,YIPF6,PERP,HES1,TACSTD2,CDH1,LAMB3,DSG2,CLDN1,CTTN,SDC1,CARD10,WNT9A,C6ORF…
GO:CC	cytoplasmic vesicle	GO:0031410	1.5502e-07	22.621	6.80961	2392	4579	729	18911	TSPAN15,CTSV,TMEM184A,HSPA1A,HSPA1B,BAIAP2,TOM1L1,PLPP2,CHMP4C,PDGFB,MYO5B,F11R,WNT7B,CYB561,PIGT,LAPTM4B,SCNN1A,PMEPA1,YIPF6,CDH1,AP1M2,EPN3,BCAP31,SYT12,FNBP1L,SLPI,GPRC5C,TGFA,MARVELD3,STON2,DSC2,RAP1GAP,WASL,KIFC3,MARVELD2,SPIRE2,GPRC5A,DSP,SYT7,JUP,CACNG4,GIPC1,FRK,PROM2,STX1A,MCOLN3,PCSK1N,OCLN,EGFR,CTSD,SYT17,MICALL2,STX3,PACSIN3,RAB25,CXADR,MORN2,ATP9A,F2RL1,ANXA3,CHMP4B,ARFGEF3,EMP2,ADAM…
HPA	small intestine; glandular cells[‚â•Low]	HPA:0480051	1.58124e-07	22.5924	6.801	7385	1263	605	18911	TSPAN15,KIAA1522,KRT8,TUFT1,RIPK4,KRT18,BAIAP2L1,HSPA1A,HSPA1B,WWC1,DDR1,CLDN4,BAIAP2,TLCD1,PIP4K2C,FAM83H,CHMP4C,PLEKHG3,PDGFB,RASEF,PRXL2A,CCNJL,ELF3,MYO5B,EPCAM,SDC4,ARHGEF16,EPB41L1,GRB7,F11R,PATJ,TNFRSF21,KRT15,TSKU,MYH14,CYB561,TSPAN6,ANKEF1,ITGB4,CDS1,FOXA1,KIAA1671,SCNN1A,MAP7,ETNK2,VAPB,MET,SOWAHC,PCDH1,CGN,MAP3K9,ITGB6,ESRP1,THRB,ACOT4,AGRN,EFNA5,TMEM132A,CEP170B,CDH1,LAMB3,DSG2,EPN3,CL…
HPA	small intestine	HPA:0480000	1.58124e-07	22.5924	6.801	7385	1263	605	18911	TSPAN15,KIAA1522,KRT8,TUFT1,RIPK4,KRT18,BAIAP2L1,HSPA1A,HSPA1B,WWC1,DDR1,CLDN4,BAIAP2,TLCD1,PIP4K2C,FAM83H,CHMP4C,PLEKHG3,PDGFB,RASEF,PRXL2A,CCNJL,ELF3,MYO5B,EPCAM,SDC4,ARHGEF16,EPB41L1,GRB7,F11R,PATJ,TNFRSF21,KRT15,TSKU,MYH14,CYB561,TSPAN6,ANKEF1,ITGB4,CDS1,FOXA1,KIAA1671,SCNN1A,MAP7,ETNK2,VAPB,MET,SOWAHC,PCDH1,CGN,MAP3K9,ITGB6,ESRP1,THRB,ACOT4,AGRN,EFNA5,TMEM132A,CEP170B,CDH1,LAMB3,DSG2,EPN3,CL…
GO:CC	intracellular vesicle	GO:0097708	1.58335e-07	22.5905	6.80042	2396	4579	730	18911	TSPAN15,CTSV,TMEM184A,HSPA1A,HSPA1B,BAIAP2,TOM1L1,PLPP2,CHMP4C,PDGFB,MYO5B,F11R,WNT7B,CYB561,PIGT,LAPTM4B,SCNN1A,PMEPA1,YIPF6,CDH1,AP1M2,EPN3,BCAP31,SYT12,FNBP1L,SLPI,GPRC5C,TGFA,MARVELD3,STON2,DSC2,RAP1GAP,WASL,KIFC3,MARVELD2,SPIRE2,GPRC5A,DSP,SYT7,JUP,CACNG4,GIPC1,FRK,PROM2,STX1A,MCOLN3,PCSK1N,OCLN,EGFR,CTSD,SYT17,MICALL2,STX3,PACSIN3,RAB25,CXADR,MORN2,ATP9A,F2RL1,ANXA3,CHMP4B,ARFGEF3,EMP2,ADAM…
HPA	breast; glandular cells[‚â•Low]	HPA:0050051	1.67854e-07	22.5063	6.77507	6477	706	323	18911	TSPAN15,KIAA1522,KRT8,TUFT1,KRT18,BAIAP2L1,HSPA1A,HSPA1B,WWC1,PPL,DDR1,CLDN4,FAM241B,BAIAP2,TLCD1,PIP4K2C,FAM83H,CHMP4C,PLEKHG3,PDGFB,RASEF,PRXL2A,CCNJL,MYO5B,EPCAM,SDC4,ARHGEF16,EPB41L1,GRB7,F11R,WFDC2,PATJ,TNFRSF21,KRT15,AIF1L,MYH14,CYB561,TSPAN6,ANKEF1,TFAP2C,ITGB4,FOXA1,KIAA1671,SCNN1A,MAP7,PON3,ETNK2,VAPB,MET,SOWAHC,PCDH1,CGN,MAP3K9,ESRP1,KRT7,EFNA5,CDH1,LAMB3,DSG2,EPN3,CLDN1,CTTN,BCAP31,RCE…
GO:MF	cell adhesive protein binding involved in bundle of His cell-Purkinje myocyte communication	GO:0086083	1.73393e-07	22.4595	6.76097	5	244	5	18911	DSG2,DSC2,PKP2,DSP,JUP
TF	Factor: AP-2rep; motif: NGGGGCGGGGC	TF:M09967	1.89301e-07	22.3328	6.72285	3885	2466	658	18911	TSPAN15,LAMA5,KRT8,CELSR1,TUFT1,SHTN1,KRT18,BAIAP2L1,RHPN2,PPL,BAIAP2,MAL2,PLPP2,PIP4K2C,FAM83H,IGSF3,P2RY2,BCAM,PKP3,CHMP4C,SPR,MYO5B,EEF1A2,SDC4,ARHGEF16,PAK4,GRB7,WFDC2,PATJ,MYH14,PIGT,LAPTM4B,TFAP2C,CDS1,LLGL2,B3GNT5,VWA1,IQANK1,KLC3,VAPB,SOWAHC,C19ORF33,LYPD3,CGN,MAP3K9,ESRP2,KRT7,AGRN,CEP170B,DSG2,CTTN,BCAP31,RCE1,SDC1,FNBP1L,WNT9A,JAG2,OVOL2,CLMN,SSH3,CDC42BPG,TJP1,CMTM4,SHB,RGL3,SLC2A4RG,…
TF	Factor: AP-2beta; motif: NSCCNNNGGSN	TF:M11478	2.02611e-07	22.2348	6.69334	9522	2000	1196	18911	TSPAN15,KIAA1522,CTSV,LAMA5,KRT8,CELSR1,TMEM184A,KRT80,KRT18,EFNA1,RHPN2,HSPA1A,HSPA1B,PPL,MAP3K13,FAM241B,BAIAP2,ADGRG1,MAL2,TLCD1,PLPP2,PIP4K2C,FAM83H,IGSF3,P2RY2,BCAM,RAB5IF,PDGFB,CCNJL,SPR,MYO5B,EEF1A2,EPCAM,SDC4,ARHGEF16,NHLRC1,GRB7,PTPRF,PATJ,TNFRSF21,WNT7B,KRT15,TSKU,AIF1L,MYH14,CYB561,TSPAN6,PIGT,TFAP2C,ITGB4,CDS1,LLGL2,FOXA1,KIAA1671,B3GNT5,MAP7,VWA1,ETNK2,IQANK1,KLC3,VAPB,TSPAN13,MET,SO…
TF	Factor: Egr-1; motif: CCGCCCMCG	TF:M04797	2.03737e-07	22.2268	6.69093	4955	3498	1111	18911	KIAA1522,LAMA5,KRT8,CELSR1,SHTN1,TMEM184A,KRT18,BAIAP2L1,WWC1,FAM241B,BAIAP2,MAL2,PLPP2,FAM83H,IGSF3,BCAM,PDGFB,RASEF,MYO5B,EEF1A2,SDC4,PAK4,WFDC2,PTPRF,MYH14,ARHGAP39,CYB561,ANKEF1,TFAP2C,CDS1,LLGL2,FOXA1,B3GNT5,VWA1,ETNK2,IQANK1,KLC3,VAPB,MET,SOWAHC,MAP3K9,ESRP2,CEP170B,CDH1,TMEM54,EPN3,CTTN,BCAP31,RCE1,SDC1,SYT12,CARD10,WNT9A,JAG2,ATP1B1,CLMN,PTPN3,SSH3,GPRC5C,CDC42BPG,TJP1,STAU1,SLC2A4RG,GRHL…
TF	Factor: Egr-1; motif: NNNNNGYGKGGGNGGGNN	TF:M09603	2.16619e-07	22.1383	6.6643	4434	2853	846	18911	KIAA1522,CTSV,KRT8,KRT18,BAIAP2L1,RHPN2,WWC1,PPL,BAIAP2,MAL2,FAM83H,P2RY2,BCAM,EEF1A2,SDC4,ARHGEF16,GRB7,PTPRF,PATJ,CYB561,LAPTM4B,ANKEF1,TFAP2C,CDS1,FOXA1,KIAA1671,B3GNT5,ETNK2,IQANK1,TSPAN13,SOWAHC,KRT7,AGRN,ST6GALNAC2,CEP170B,CDH1,TMEM54,DSG2,CTTN,BCAP31,FNBP1L,CARD10,WNT9A,JAG2,OVOL2,STYK1,ATP1B1,ABCC3,CLMN,PTPN3,GPRC5C,CDC42BPG,PRPF6,TJP1,CMTM4,DSC2,STAU1,GRHL1,RAP1GAP,PLS1,REPS2,INHBB,WASL,…
HPA	HPA root	HPA:0000000	2.26766e-07	22.0723	6.64442	10396	1241	796	18911	TSPAN15,KIAA1522,LAMA5,KRT8,TUFT1,SHTN1,RIPK4,KRT18,BAIAP2L1,HSPA1A,HSPA1B,WWC1,PPL,DDR1,CLDN4,FAM241B,BAIAP2,TLCD1,PIP4K2C,FAM83H,IGSF3,PKP3,CHMP4C,PLEKHG3,PDGFB,RASEF,PRXL2A,CCNJL,ELF3,MYO5B,EEF1A2,EPCAM,SDC4,ARHGEF16,EPB41L1,GRB7,F11R,WFDC2,PATJ,TNFRSF21,KRT15,TSKU,AIF1L,MYH14,CYB561,TSPAN6,ANKEF1,TFAP2C,ITGB4,CDS1,FOXA1,KIAA1671,SCNN1A,MAP7,PON3,ETNK2,KLC3,VAPB,MET,SOWAHC,PCDH1,LYPD3,CGN,MAP3…
TF	Factor: DB1; motif: GGRRRRGRRGGAGGGGGNGRRR	TF:M10107	2.46547e-07	21.9516	6.6081	5611	3030	1094	18911	KIAA1522,LAMA5,BAIAP2L1,EFNA1,RHPN2,HSPA1A,MLF1,WWC1,CLDN4,FAM241B,BAIAP2,ADGRG1,MAL2,TLCD1,PLPP2,PLEKHG3,PDGFB,PRXL2A,CCNJL,EEF1A2,EPCAM,ARHGEF16,GRB7,WFDC2,PTPRF,TNFRSF21,AIF1L,MYH14,ARHGAP39,CYB561,TSPAN6,LAPTM4B,ANKEF1,TFAP2C,SLC39A1,CDS1,FOXA1,SCNN1A,ETNK2,SOWAHC,PCDH1,LYPD3,CGN,MAP3K9,ESRP2,ESRP1,KRT7,AGRN,SFN,ST6GALNAC2,TMEM132A,CEP170B,HES1,TACSTD2,CDH1,S100A2,CTTN,BCAP31,PRSS22,SDC1,SYT1…
HPA	placenta	HPA:0380000	2.55713e-07	21.899	6.59225	7061	2014	890	18911	TSPAN15,KIAA1522,KRT8,TUFT1,KRT18,BAIAP2L1,HSPA1A,HSPA1B,WWC1,DDR1,CLDN4,FAM241B,BAIAP2,TLCD1,PIP4K2C,FAM83H,IGSF3,CHMP4C,PLEKHG3,PDGFB,RASEF,PRXL2A,CCNJL,ELF3,MYO5B,SDC4,ARHGEF16,EPB41L1,GRB7,F11R,PATJ,TNFRSF21,TSKU,TSPAN6,ANKEF1,TFAP2C,ITGB4,CDS1,KIAA1671,SCNN1A,MAP7,ETNK2,KLC3,VAPB,MET,SOWAHC,PCDH1,CGN,MAP3K9,ITGB6,ESRP1,ACOT4,KRT7,AGRN,EFNA5,CPVL,CDH1,LAMB3,DSG2,EPN3,CLDN1,CTTN,BCAP31,RCE1,SD…
HPA	cervix, uterine; glandular cells[‚â•Low]	HPA:0110051	2.6375e-07	21.8543	6.57881	5454	2013	709	18911	TSPAN15,KIAA1522,KRT8,TUFT1,KRT18,BAIAP2L1,HSPA1A,HSPA1B,PPL,DDR1,CLDN4,BAIAP2,TLCD1,PIP4K2C,FAM83H,CHMP4C,PLEKHG3,PDGFB,PRXL2A,CCNJL,ELF3,MYO5B,EPCAM,SDC4,ARHGEF16,EPB41L1,GRB7,F11R,WFDC2,PATJ,MYH14,CYB561,TSPAN6,ANKEF1,ITGB4,CDS1,KIAA1671,SCNN1A,MAP7,ETNK2,KLC3,VAPB,MET,SOWAHC,PCDH1,CGN,MAP3K9,ESRP1,KRT7,EFNA5,CDH1,DSG2,CLDN1,CTTN,BCAP31,SDC1,FNBP1L,SLC25A13,CARD10,JAG2,SLPI,TACC2,ABCC3,CLMN,PT…
HPA	appendix	HPA:0030000	2.88636e-07	21.7242	6.53965	7374	1153	555	18911	TSPAN15,KIAA1522,KRT8,TUFT1,KRT18,BAIAP2L1,HSPA1A,HSPA1B,WWC1,DDR1,CLDN4,FAM241B,BAIAP2,TLCD1,PIP4K2C,FAM83H,PKP3,CHMP4C,PLEKHG3,PDGFB,RASEF,PRXL2A,ELF3,MYO5B,EPCAM,SDC4,ARHGEF16,EPB41L1,GRB7,F11R,WFDC2,PATJ,TNFRSF21,KRT15,TSKU,MYH14,CYB561,TSPAN6,ANKEF1,ITGB4,CDS1,FOXA1,KIAA1671,SCNN1A,MAP7,ETNK2,KLC3,VAPB,MET,SOWAHC,PCDH1,CGN,MAP3K9,ITGB6,ESRP1,THRB,ACOT4,AGRN,EFNA5,SFN,TMEM132A,CEP170B,CDH1,LA…
GO:BP	localization	GO:0051179	2.94786e-07	21.6938	6.53049	6565	3581	1479	18911	TSPAN15,LAMA5,CELSR1,SHTN1,KRT18,EFNA1,HSPA1A,HSPA1B,WWC1,DDR1,CLDN4,BAIAP2,ADGRG1,MAL2,TOM1L1,FAM83H,P2RY2,PKP3,CHMP4C,PDGFB,MYO5B,EPCAM,SDC4,ARHGEF16,NHLRC1,PAK4,GRB7,F11R,PTPRF,LAPTM4B,SLC39A1,ITGB4,CDS1,LLGL2,SCNN1A,MAP7,KLC3,VAPB,TSPAN13,MET,ITGB6,STARD10,ACOT4,AGRN,EFNA5,SFN,HES1,TACSTD2,CDH1,TMEM30B,AP1M2,LAMB3,S100A2,DSG2,EPN3,CLDN1,CTTN,BCAP31,SDC1,SYT12,FNBP1L,SLC25A13,CARD10,SLPI,GET4,…
TF	Factor: KLF15; motif: NCCMCGCCCMCN	TF:M12158	3.07802e-07	21.6315	6.51173	10636	2822	1818	18911	TSPAN15,KIAA1522,CTSV,LAMA5,KRT8,CELSR1,TUFT1,SHTN1,RIPK4,TMEM184A,KRT18,BAIAP2L1,EFNA1,RHPN2,SOX13,HSPA1A,MLF1,HSPA1B,DDX27,WWC1,PPL,DDR1,CLDN4,FAM241B,BAIAP2,ADGRG1,TLCD1,PLPP2,PIP4K2C,FAM83H,IGSF3,P2RY2,BCAM,PKP3,RAB5IF,PDGFB,RASEF,PRXL2A,CCNJL,SPR,MYO5B,EEF1A2,EPCAM,ARHGEF16,EPB41L1,PAK4,GRB7,F11R,WFDC2,PTPRF,PATJ,TNFRSF21,WNT7B,KRT15,MYH14,CYB561,TSPAN6,PIGT,LAPTM4B,ANKEF1,TFAP2C,SLC39A1,ITG…
TF	Factor: HIC1; motif: NSNNNNTGCCCSSNN; match class: 1	TF:M01072_1	3.23341e-07	21.5604	6.49034	868	2850	210	18911	CELSR1,ARHGEF16,GRB7,WNT7B,LLGL2,KIAA1671,KLC3,CEP170B,BCAP31,SYT12,GET4,CDC42BPG,TGFA,SLC2A4RG,CITED4,SPIRE2,PARD6B,ITGA3,RASSF10,ERRFI1,BCAR1,LRP5,RYK,SYT17,HMGB3,LTBP3,PLEC,PARD3,GALE,LTBR,IQCE,PSMA7,PACSIN3,CXADR,AGAP1,FAM131C,MLPH,PERM1,ADAM15,NR2F6,FAM110C,ELOVL7,PWWP2B,HOXC13,SQSTM1,KIAA1211L,SLC9A3R2,CASKIN2,RBP7,TBC1D30,B4GALT5,TEAD1,SYDE2,GTF2IRD1,ARAP3,ACP7,HACD2,MARK1,GRB14,CRIP2,DHRS…
HPA	pancreas; exocrine glandular cells[‚â•Low]	HPA:0350471	3.34142e-07	21.513	6.47607	6585	706	326	18911	TSPAN15,KIAA1522,KRT8,TUFT1,KRT18,BAIAP2L1,HSPA1A,WWC1,PPL,DDR1,CLDN4,BAIAP2,TLCD1,PIP4K2C,FAM83H,PKP3,CHMP4C,PLEKHG3,PDGFB,RASEF,PRXL2A,CCNJL,ELF3,MYO5B,EPCAM,SDC4,ARHGEF16,EPB41L1,GRB7,F11R,PATJ,TNFRSF21,TSKU,MYH14,CYB561,TSPAN6,ANKEF1,CDS1,KIAA1671,SCNN1A,MAP7,ETNK2,VAPB,MET,PCDH1,CGN,MAP3K9,ITGB6,ESRP1,KRT7,EFNA5,CPVL,CEP170B,TACSTD2,CDH1,LAMB3,DSG2,EPN3,CLDN1,CTTN,BCAP31,PRSS22,RCE1,SDC1,FNB…
TF	Factor: Sp1; motif: RGGGMGGRGSNGGGG; match class: 1	TF:M10529_1	3.36165e-07	21.5043	6.47345	2710	3954	727	18911	LAMA5,KRT8,KRT18,BAIAP2L1,RHPN2,WWC1,CLDN4,BAIAP2,PLPP2,IGSF3,P2RY2,BCAM,CCNJL,EEF1A2,EPCAM,ARHGEF16,PAK4,GRB7,TSPAN6,LLGL2,ETNK2,PCDH1,MAP3K9,ESRP1,KRT7,AGRN,CEP170B,TMEM54,CTTN,BCAP31,FNBP1L,CARD10,JAG2,OVOL2,ATP1B1,CLMN,PTPN3,SHB,STAU1,SLC2A4RG,GRHL1,PPP1R26,RAP1GAP,TFAP2A,MUC1,MPP3,PKP2,KLF5,TBC1D8,CTNND1,SPIRE2,DSP,CUEDC1,CACNG4,PANX2,ABHD11,SPTBN2,TMEM40,LAMA3,NUDT14,KIF21A,PLEKHA7,SEZ6L2,S…
REAC	Type I hemidesmosome assembly	REAC:R-HSA-446107	3.39087e-07	21.4918	6.46969	11	1813	10	18911	ITGB4,LAMB3,LAMC2,LAMA3,PLEC,DST,COL17A1,KRT5,CD151,ITGA6
TF	Factor: ctcf; motif: CCRSCAGGGGGCGCN; match class: 1	TF:M10426_1	3.61021e-07	21.4014	6.44247	4209	4264	1151	18911	KIAA1522,LAMA5,CELSR1,TMEM184A,WWC1,PPL,FAM241B,BAIAP2,MAL2,FAM83H,BCAM,RAB5IF,RASEF,CCNJL,SPR,MYO5B,ARHGEF16,NHLRC1,PTPRF,PATJ,TNFRSF21,MYH14,LAPTM4B,LLGL2,FOXA1,B3GNT5,MAP7,VWA1,ETNK2,IQANK1,SOWAHC,PCDH1,MAP3K9,ESRP1,STARD10,AGRN,EFNA5,KIAA0895,ST6GALNAC2,PERP,TACSTD2,TMEM30B,TMEM54,DSG2,TRIM47,CLDN1,CTTN,BCAP31,SYT12,FNBP1L,CARD10,JAG2,TACC2,ATP1B1,ABCC3,PTPN3,LSR,CDC42BPG,TGFA,CMTM4,SHB,STAU1…
GO:CC	organelle membrane	GO:0031090	3.90571e-07	21.2879	6.4083	3508	4573	1034	18911	TSPAN15,TMEM184A,TOM1L1,PLPP2,CHMP4C,RAB5IF,PDGFB,MYO5B,EEF1A2,WNT7B,CYB561,PIGT,LAPTM4B,SLC39A1,ITGB4,CDS1,B3GNT5,SCNN1A,VAPB,PMEPA1,YIPF6,ST6GALNAC2,TMEM132A,AP1M2,EPN3,BCAP31,RCE1,SYT12,SLC25A13,ATP1B1,CLMN,GPRC5C,TSPAN1,TGFA,GRAMD2A,HM13,RAP1GAP,EPHX1,WASL,VMP1,KIFC3,DPM1,B3GNT3,SPIRE2,GPAT3,PRRG4,LMNA,GPRC5A,DSP,GCNT2,SYT7,SYS1,CACNG4,GIPC1,SPTSSB,SEZ6L2,PROM2,STX1A,MCOLN3,POR,MTARC1,OCLN,EG…
GO:BP	adherens junction organization	GO:0034332	4.08126e-07	21.2245	6.38921	68	492	15	18911	CDH1,TJP1,KIFC3,CTNND1,CDH3,DLG5,DSP,JUP,PLEKHA7,NECTIN4,PVR,INAVA,CTNNA1,CAMSAP3,NECTIN2
GO:BP	movement in host environment	GO:0052126	4.09194e-07	21.2207	6.38807	173	1180	36	18911	HSPA1A,HSPA1B,CHMP4C,F11R,VAPB,MET,ITGB6,CDH1,CLDN9,CLDN1,CTNND1,EGFR,NECTIN4,PC,EPHA2,PVR,CXADR,CHMP4B,MID2,NECTIN2,ITGB5,PLSCR1,DAG1,ITGA2,ITCH,CAV2,KRT6A,SLC52A2,LY6E,FUCA2,EFNB2,CTSL,TMPRSS4,SRC,CD46,CHMP3
GO:BP	regulation of actin filament-based process	GO:0032970	4.34011e-07	21.1358	6.3625	395	535	38	18911	CELSR1,BAIAP2L1,BAIAP2,SDC4,F11R,MET,EFNA5,TACSTD2,DSG2,CTTN,SSH3,TJP1,DSC2,WASL,PKP2,SPIRE2,ID1,DSP,NCKAP1,JUP,SPTBN2,PPFIA1,SEMA3E,LIMCH1,PXN,ARPC1A,ARHGEF5,F2RL1,CDC42EP4,RHOD,SMIM22,SVIL,RAC1,CARMIL1,RHOBTB3,PHLDB2,ECT2,S100A10
GO:BP	actomyosin structure organization	GO:0031032	4.38648e-07	21.1204	6.35788	197	574	27	18911	KRT8,SDC4,EPB41L1,F11R,MYH14,MET,TACSTD2,CDC42BPG,TJP1,SIX4,KRT19,PPFIA1,LIMCH1,PXN,OBSL1,FHDC1,ARHGEF5,RAC1,CDC42BPB,TNNT1,CARMIL1,ITGB5,PHLDB2,ECT2,S100A10,RTKN,ANLN
TF	Factor: CTCF; motif: NCCRSTAGGGGGCGC	TF:M08911	4.60574e-07	21.0501	6.3367	8724	3870	2048	18911	KIAA1522,CTSV,LAMA5,CELSR1,RIPK4,TMEM184A,BAIAP2L1,RHPN2,WWC1,PPL,MAP3K13,CLDN4,FAM241B,BAIAP2,ADGRG1,MAL2,TOM1L1,TLCD1,PLPP2,PIP4K2C,FAM83H,IGSF3,BCAM,PKP3,PLEKHG3,RAB5IF,PDGFB,RASEF,CCNJL,SPR,MYO5B,EEF1A2,EPCAM,ARHGEF16,NHLRC1,GRB7,WFDC2,PTPRF,TNFRSF21,WNT7B,TSKU,MYH14,TSPAN6,SLC39A1,ITGB4,CDS1,LLGL2,FOXA1,B3GNT5,MAP7,VWA1,PON3,ETNK2,IQANK1,MET,SOWAHC,PCDH1,CGN,MAP3K9,ESRP2,ESRP1,STARD10,KRT7,A…
WP	Epithelial to mesenchymal transition in colorectal cancer	WP:WP4239	4.77127e-07	20.9991	6.32137	160	1698	40	18911	CLDN4,WNT7B,CDH1,CLDN9,CLDN1,WNT9A,JAG2,TJP1,CLDN7,PKP2,ID1,DSP,JUP,CLDN3,OCLN,LRP5,CRB3,PDCD6,CLDN12,NUBPL,MMP15,PIK3CB,WNT4,CLDN8,COL4A6,TGFB2,CLDN23,FZD6,CLDN10,TMPRSS4,WNT3,MPP5,COL4A5,JAG1,FOXQ1,FZD5,PKP1,WNT10A,DLL1,MMP9
TF	Factor: SP1; motif: RCCMCRCCCMC; match class: 1	TF:M03920_1	4.9343e-07	20.9507	6.30677	2900	2839	578	18911	KRT8,CELSR1,KRT18,BAIAP2L1,EFNA1,RHPN2,DDR1,BAIAP2,PIP4K2C,FAM83H,IGSF3,P2RY2,BCAM,PKP3,EEF1A2,ARHGEF16,PAK4,GRB7,PATJ,MYH14,CDS1,LLGL2,B3GNT5,VWA1,ETNK2,IQANK1,KLC3,TSPAN13,SOWAHC,LYPD3,CGN,MAP3K9,AGRN,CEP170B,CTTN,BCAP31,RCE1,SDC1,WNT9A,JAG2,CLMN,GPRC5C,PRPF6,TJP1,CMTM4,SHB,RGL3,SLC2A4RG,PPP1R26,RAP1GAP,REPS2,PLEKHG6,INHBB,MPP3,PKP2,KLF5,MARVELD2,CITED4,G6PD,TBC1D8,MB,SPIRE2,SPINT1,JUP,CACNG4,P…
TF	Factor: Sp4; motif: SCCCCKCCCCCSN	TF:M07617	4.98472e-07	20.936	6.30236	3484	2841	673	18911	LAMA5,KRT8,CELSR1,KRT18,BAIAP2L1,WWC1,PPL,BAIAP2,PLPP2,PIP4K2C,FAM83H,IGSF3,P2RY2,BCAM,PKP3,CCNJL,SPR,MYO5B,EEF1A2,SDC4,ARHGEF16,PAK4,GRB7,PTPRF,MYH14,CYB561,PIGT,LAPTM4B,ANKEF1,CDS1,LLGL2,B3GNT5,SCNN1A,VWA1,ETNK2,IQANK1,KLC3,SOWAHC,C19ORF33,CGN,MAP3K9,ESRP2,KRT7,AGRN,CEP170B,CTTN,BCAP31,FNBP1L,JAG2,OVOL2,CLMN,CDC42BPG,TJP1,CMTM4,SHB,ZNF205,STAU1,SLC2A4RG,GRHL1,PPP1R26,RAP1GAP,REPS2,PLEKHG6,MAB21…
HPA	urinary bladder; urothelial cells[‚â•Medium]	HPA:0610832	5.36291e-07	20.8305	6.2706	5671	1238	472	18911	TSPAN15,KIAA1522,KRT8,TUFT1,KRT18,BAIAP2L1,HSPA1A,HSPA1B,WWC1,PPL,DDR1,CLDN4,BAIAP2,TLCD1,FAM83H,PKP3,CHMP4C,PLEKHG3,PDGFB,RASEF,PRXL2A,CCNJL,ELF3,MYO5B,SDC4,ARHGEF16,EPB41L1,GRB7,F11R,PATJ,TNFRSF21,MYH14,TSPAN6,ANKEF1,ITGB4,FOXA1,KIAA1671,SCNN1A,MAP7,VAPB,MET,SOWAHC,PCDH1,CGN,MAP3K9,ITGB6,ESRP1,KRT7,AGRN,CEP170B,TACSTD2,CDH1,S100A2,DSG2,EPN3,CLDN1,CTTN,BCAP31,RCE1,SDC1,FNBP1L,CARD10,JAG2,TACC2,A…
GO:MF	virus receptor activity	GO:0001618	5.48629e-07	20.7977	6.26072	76	584	16	18911	HSPA1A,HSPA1B,F11R,ITGB6,CLDN9,CLDN1,EGFR,NECTIN4,EPHA2,PVR,CXADR,NECTIN2,ITGB5,PLSCR1,DAG1,ITGA2
TF	Factor: CTCF; motif: NCCRSTAGGGGGCGC; match class: 1	TF:M08911_1	5.73121e-07	20.7347	6.24175	3811	3958	978	18911	KIAA1522,LAMA5,CELSR1,BAIAP2L1,WWC1,PPL,FAM241B,BAIAP2,MAL2,TLCD1,PIP4K2C,FAM83H,PDGFB,RASEF,SPR,EEF1A2,EPCAM,PTPRF,TNFRSF21,MYH14,LLGL2,FOXA1,B3GNT5,MAP7,VWA1,ETNK2,IQANK1,SOWAHC,PCDH1,MAP3K9,ESRP1,STARD10,KRT7,AGRN,SFN,ST6GALNAC2,PERP,CEP170B,CDH1,TMEM54,TRIM47,CTTN,SDC1,SYT12,CARD10,JAG2,ATP1B1,CLMN,PTPN3,LSR,GPRC5C,CDC42BPG,TJP1,CMTM4,SHB,SLC2A4RG,GRHL1,PPP1R26,WASL,CLDN7,CITED4,G6PD,ADRM1,B3…
HPA	prostate; glandular cells[‚â•Low]	HPA:0390051	5.82998e-07	20.71	6.23433	6362	706	316	18911	TSPAN15,KIAA1522,KRT8,KRT18,BAIAP2L1,HSPA1A,HSPA1B,WWC1,PPL,DDR1,CLDN4,BAIAP2,TLCD1,PIP4K2C,FAM83H,CHMP4C,PDGFB,RASEF,PRXL2A,CCNJL,MYO5B,SDC4,ARHGEF16,GRB7,F11R,WFDC2,PATJ,TNFRSF21,KRT15,TSKU,MYH14,CYB561,TSPAN6,ANKEF1,ITGB4,FOXA1,KIAA1671,SCNN1A,MAP7,ETNK2,VAPB,MET,SOWAHC,PCDH1,CGN,MAP3K9,ESRP1,ACOT4,KRT7,EFNA5,SFN,CDH1,LAMB3,DSG2,EPN3,CLDN1,CTTN,BCAP31,RCE1,FNBP1L,SLC25A13,CARD10,JAG2,TACC2,STY…
HPA	prostate	HPA:0390000	5.82998e-07	20.71	6.23433	6362	706	316	18911	TSPAN15,KIAA1522,KRT8,KRT18,BAIAP2L1,HSPA1A,HSPA1B,WWC1,PPL,DDR1,CLDN4,BAIAP2,TLCD1,PIP4K2C,FAM83H,CHMP4C,PDGFB,RASEF,PRXL2A,CCNJL,MYO5B,SDC4,ARHGEF16,GRB7,F11R,WFDC2,PATJ,TNFRSF21,KRT15,TSKU,MYH14,CYB561,TSPAN6,ANKEF1,ITGB4,FOXA1,KIAA1671,SCNN1A,MAP7,ETNK2,VAPB,MET,SOWAHC,PCDH1,CGN,MAP3K9,ESRP1,ACOT4,KRT7,EFNA5,SFN,CDH1,LAMB3,DSG2,EPN3,CLDN1,CTTN,BCAP31,RCE1,FNBP1L,SLC25A13,CARD10,JAG2,TACC2,STY…
TF	Factor: MRF4; motif: CASCTGC; match class: 1	TF:M03831_1	5.85153e-07	20.7047	6.23273	2631	450	121	18911	TSPAN15,KIAA1522,LAMA5,TMEM184A,RHPN2,WWC1,PPL,CLDN4,FAM241B,ADGRG1,TOM1L1,FAM83H,BCAM,RASEF,SPR,ELF3,EEF1A2,EPCAM,ARHGEF16,EPB41L1,F11R,PATJ,CYB561,LLGL2,FOXA1,SCNN1A,VWA1,IQANK1,TSPAN13,MET,PCDH1,C19ORF33,CGN,ESRP2,SFN,ST6GALNAC2,CDH1,CLDN1,JAG2,SSH3,LSR,CMTM4,ZNF205,PPP1R26,PLS1,PLEKHG6,MAB21L4,MPP3,PKP2,DNAH14,G6PD,AURKA,B3GNT3,CDH3,GRHL2,NANOS1,JUP,PARD6B,ACP6,PANX2,ABHD11,RASSF10,GIPC1,MISP…
TF	Factor: HTF4; motif: CASCTGB; match class: 1	TF:M02018_1	5.85153e-07	20.7047	6.23273	2631	450	121	18911	TSPAN15,KIAA1522,LAMA5,TMEM184A,RHPN2,WWC1,PPL,CLDN4,FAM241B,ADGRG1,TOM1L1,FAM83H,BCAM,RASEF,SPR,ELF3,EEF1A2,EPCAM,ARHGEF16,EPB41L1,F11R,PATJ,CYB561,LLGL2,FOXA1,SCNN1A,VWA1,IQANK1,TSPAN13,MET,PCDH1,C19ORF33,CGN,ESRP2,SFN,ST6GALNAC2,CDH1,CLDN1,JAG2,SSH3,LSR,CMTM4,ZNF205,PPP1R26,PLS1,PLEKHG6,MAB21L4,MPP3,PKP2,DNAH14,G6PD,AURKA,B3GNT3,CDH3,GRHL2,NANOS1,JUP,PARD6B,ACP6,PANX2,ABHD11,RASSF10,GIPC1,MISP…
TF	Factor: LUMAN; motif: CYCAGCYYCY	TF:M09729	6.06957e-07	20.6519	6.21684	10163	1903	1212	18911	KIAA1522,CTSV,LAMA5,KRT8,CELSR1,TUFT1,SHTN1,RIPK4,TMEM184A,KRT80,KRT18,BAIAP2L1,EFNA1,RHPN2,WWC1,PPL,DDR1,CLDN4,FAM241B,BAIAP2,MAL2,TOM1L1,TLCD1,PLPP2,PIP4K2C,FAM83H,IGSF3,P2RY2,BCAM,PKP3,PLEKHG3,RAB5IF,PDGFB,CCNJL,SPR,ELF3,EEF1A2,EPCAM,SDC4,ARHGEF16,NHLRC1,EPB41L1,PAK4,GRB7,WFDC2,PTPRF,TNFRSF21,WNT7B,KRT15,AIF1L,ARHGAP39,CYB561,TSPAN6,TFAP2C,SLC39A1,ITGB4,CDS1,LLGL2,FOXA1,SCNN1A,VWA1,ETNK2,IQANK…
GO:MF	exogenous protein binding	GO:0140272	6.7301e-07	20.5029	6.17198	77	584	16	18911	HSPA1A,HSPA1B,F11R,ITGB6,CLDN9,CLDN1,EGFR,NECTIN4,EPHA2,PVR,CXADR,NECTIN2,ITGB5,PLSCR1,DAG1,ITGA2
HP	Sparse body hair	HP:0002231	7.51158e-07	20.3444	6.12427	58	269	11	18911	ITGB4,ITGB6,LAMB3,CLDN1,LAMC2,CDH3,LIPH,LMNA,JUP,KDF1,LAMA3
TF	Factor: BTEB2; motif: WGGGTGKGGCNGGN	TF:M09972	7.64512e-07	20.319	6.11662	8784	2662	1457	18911	TSPAN15,KIAA1522,LAMA5,KRT8,CELSR1,TUFT1,SHTN1,KRT80,KRT18,EFNA1,SOX13,HSPA1A,HSPA1B,PPL,MAP3K13,DDR1,FAM241B,TOM1L1,TLCD1,PLPP2,PIP4K2C,FAM83H,IGSF3,P2RY2,BCAM,PKP3,PLEKHG3,RAB5IF,SPR,EEF1A2,EPCAM,SDC4,ARHGEF16,PAK4,GRB7,F11R,WFDC2,PTPRF,KRT15,AIF1L,MYH14,CYB561,SLC39A1,CDS1,LLGL2,KIAA1671,B3GNT5,SCNN1A,VWA1,ETNK2,IQANK1,KLC3,VAPB,TSPAN13,MET,SOWAHC,PCDH1,C19ORF33,CGN,MAP3K9,ESRP1,STARD10,KRT7,A…
TF	Factor: PLAG1; motif: CCCCCKWNNNGGSCCC; match class: 1	TF:M01973_1	7.69343e-07	20.3099	6.11388	2293	2869	477	18911	TSPAN15,KIAA1522,RHPN2,WWC1,PPL,BAIAP2,FAM83H,IGSF3,BCAM,PKP3,PLEKHG3,PDGFB,PRXL2A,EEF1A2,SDC4,ARHGEF16,PAK4,GRB7,PTPRF,MYH14,LLGL2,FOXA1,SCNN1A,ETNK2,IQANK1,VAPB,SOWAHC,PCDH1,C19ORF33,AGRN,SFN,S100A2,TRIM47,BCAP31,SLC25A13,ABCC3,CLMN,SSH3,CDC42BPG,PRPF6,TGFA,TJP1,GRAMD2A,STAU1,SLC2A4RG,GRHL1,PPP1R26,RAP1GAP,REPS2,PLEKHG6,WASL,PKP2,SPIRE2,NANOS1,PANX2,TMEM40,NUDT14,PLEKHA7,STX1A,PCSK1N,BCAR1,EGFR…
GO:BP	exocrine system development	GO:0035272	8.20919e-07	20.2163	6.0857	48	1903	22	18911	LAMA5,IGSF3,ESRP2,EGFR,CLCN2,DAG1,FGFR2,PLXNA1,FOXC1,TGFB2,NTN4,CST3,TFCP2L1,TGM2,RAB26,NFIB,SEMA3A,PDGFA,WLS,SOX9,SEMA3C,BMP7
GO:BP	reproductive system development	GO:0061458	8.25689e-07	20.2079	6.08318	453	2339	104	18911	CTSV,KRT8,ADGRG1,PDGFB,WNT7B,TFAP2C,FOXA1,ETNK2,HES1,SDC1,OVOL2,SIX4,INHBB,KRT19,GRHL2,SPINT1,SYCP2,EGFR,DMRTA1,NSDHL,INHA,SPINT2,LFNG,PLEKHA5,ADAM15,CTNNA1,RHOBTB3,DHCR24,SPATA2,GJB3,ST14,LHX1,SERPINB5,PTK2,PLEKHA1,PHLDA2,ITGB8,FGFR2,PLCD3,FOXC1,WNT4,NR2F2,SRD5A1,PPARG,TGFB2,STK3,MGST1,LGR4,RXRA,GREB1L,C3,TLR5,SOX15,BCL2L1,RAB13,SRC,CEBPB,AKR1C3,CST3,ZP3,GJB2,PLAC1,SERPINA5,STOX2,SEMA3A,PSAP,FZD…
TF	Factor: Sp1; motif: NWRGCCMCGCCCMCN	TF:M12151	8.45205e-07	20.1742	6.07304	6564	2854	1188	18911	TSPAN15,KIAA1522,CTSV,LAMA5,KRT8,CELSR1,TUFT1,RIPK4,KRT18,BAIAP2L1,RHPN2,WWC1,PPL,DDR1,BAIAP2,MAL2,TOM1L1,TLCD1,PLPP2,PIP4K2C,FAM83H,IGSF3,P2RY2,BCAM,PKP3,CHMP4C,CCNJL,MYO5B,EEF1A2,ARHGEF16,EPB41L1,PAK4,GRB7,F11R,WFDC2,PTPRF,MYH14,CYB561,PIGT,LAPTM4B,TFAP2C,SLC39A1,ITGB4,CDS1,LLGL2,B3GNT5,VWA1,PON3,ETNK2,IQANK1,KLC3,VAPB,TSPAN13,MET,SOWAHC,PCDH1,C19ORF33,LYPD3,CGN,MAP3K9,PMEPA1,ACOT4,KRT7,AGRN,SF…
TF	Factor: Pax-5; motif: BCNNNRNGCANBGNTGNRTAGCSGCHNB; match class: 1	TF:M00143_1	8.47053e-07	20.171	6.07209	4836	3252	1030	18911	KIAA1522,LAMA5,SHTN1,RIPK4,TMEM184A,BAIAP2L1,EFNA1,RHPN2,SOX13,HSPA1B,PPL,BAIAP2,ADGRG1,TLCD1,PIP4K2C,FAM83H,P2RY2,PKP3,RASEF,CCNJL,ELF3,EEF1A2,ARHGEF16,GRB7,WFDC2,PATJ,TNFRSF21,WNT7B,CYB561,LAPTM4B,SLC39A1,ITGB4,CDS1,LLGL2,FOXA1,VWA1,ETNK2,VAPB,PCDH1,C19ORF33,MAP3K9,PMEPA1,ESRP1,TRIM16L,EFNA5,KIAA0895,YIPF6,ST6GALNAC2,CEP170B,TACSTD2,TMEM30B,TMEM54,S100A2,EPN3,CLDN1,CTTN,PRSS22,SDC1,FNBP1L,CARD1…
TF	Factor: Sp3; motif: NGCCACGCCCMCN	TF:M12153	8.52598e-07	20.1616	6.06926	5973	2854	1092	18911	TSPAN15,KIAA1522,KRT8,CELSR1,RIPK4,KRT18,BAIAP2L1,EFNA1,HSPA1A,WWC1,PPL,FAM241B,BAIAP2,ADGRG1,TOM1L1,TLCD1,PLPP2,PIP4K2C,FAM83H,IGSF3,P2RY2,BCAM,PKP3,MYO5B,EEF1A2,ARHGEF16,EPB41L1,PAK4,GRB7,F11R,WFDC2,PATJ,TNFRSF21,KRT15,MYH14,CYB561,PIGT,LAPTM4B,ANKEF1,SLC39A1,ITGB4,CDS1,LLGL2,B3GNT5,VWA1,ETNK2,IQANK1,KLC3,TSPAN13,MET,SOWAHC,PCDH1,C19ORF33,CGN,MAP3K9,PMEPA1,ESRP2,ACOT4,AGRN,SFN,PERP,CEP170B,TRIM…
TF	Factor: WT1; motif: RGGNGGGGGAGGRGGNGGRG	TF:M10108	8.55113e-07	20.1574	6.06798	6238	2027	834	18911	KIAA1522,CTSV,LAMA5,SHTN1,TMEM184A,KRT80,KRT18,BAIAP2L1,EFNA1,RHPN2,HSPA1A,MLF1,WWC1,FAM241B,BAIAP2,MAL2,PLPP2,IGSF3,P2RY2,PKP3,PLEKHG3,CCNJL,EEF1A2,EPCAM,ARHGEF16,GRB7,F11R,WFDC2,PTPRF,WNT7B,AIF1L,MYH14,ARHGAP39,CYB561,PIGT,LAPTM4B,ANKEF1,CDS1,FOXA1,KIAA1671,B3GNT5,SCNN1A,MAP7,PON3,ETNK2,VAPB,PCDH1,MAP3K9,ESRP2,ESRP1,STARD10,KRT7,AGRN,EFNA5,SFN,ST6GALNAC2,CEP170B,HES1,CDH1,S100A2,DSG2,CLDN1,CTTN…
TF	Factor: ZNF148; motif: NNNNNNCCNNCCCCTCCCCCACCCN; match class: 1	TF:M09834_1	8.56019e-07	20.1559	6.06752	2763	2799	545	18911	KRT8,CELSR1,KRT80,KRT18,BAIAP2L1,DDR1,BAIAP2,TLCD1,PLPP2,PIP4K2C,IGSF3,BCAM,PKP3,EEF1A2,ARHGEF16,PAK4,GRB7,PATJ,ANKEF1,CDS1,FOXA1,IQANK1,SOWAHC,PCDH1,MAP3K9,ESRP1,KRT7,AGRN,ST6GALNAC2,CEP170B,HES1,TMEM54,CTTN,SDC1,FNBP1L,JAG2,OVOL2,CLMN,GPRC5C,CDC42BPG,TJP1,SHB,STAU1,SLC2A4RG,GRHL1,RAP1GAP,REPS2,INHBB,MUC1,PKP2,TBC1D8,SPIRE2,DSP,KDF1,CACNG4,PANX2,GIPC1,SPTBN2,TMEM40,NUDT14,PLEKHA7,SEZ6L2,PCSK1N,H…
REAC	Non-integrin membrane-ECM interactions	REAC:R-HSA-3000171	9.38467e-07	20.0232	6.02758	58	584	14	18911	LAMA5,DDR1,PDGFB,SDC4,ITGB4,AGRN,LAMB3,SDC1,LAMC2,LAMA3,LAMB1,ITGB5,DAG1,ITGA2
GO:BP	regulation of cytoskeleton organization	GO:0051493	9.76695e-07	19.9656	6.01024	519	561	45	18911	CELSR1,BAIAP2L1,HSPA1A,HSPA1B,BAIAP2,CHMP4C,SDC4,F11R,MET,EFNA5,TACSTD2,CTTN,SSH3,TJP1,CAPN2,WASL,SPIRE2,ID1,NCKAP1,SPTBN2,OCLN,PPFIA1,SEMA3E,LIMCH1,PXN,ARPC1A,ARHGEF5,F2RL1,CHMP4B,CDC42EP4,RHOD,SMIM22,SVIL,RAC1,CARMIL1,CAMSAP3,RHOBTB3,RASSF7,PHLDB2,PRKAA2,S100A9,ECT2,S100A10,RAE1,DSTN
KEGG	Adherens junction	KEGG:04520	1.00272e-06	19.9276	5.99882	71	524	14	18911	BAIAP2,PTPRF,MET,CDH1,TJP1,WASL,CTNND1,EGFR,NECTIN4,PARD3,RAC1,CTNNA1,NECTIN2,YES1
HP	Oral mucosal blisters	HP:0200097	1.03121e-06	19.8872	5.98665	13	327	7	18911	ITGB4,LAMB3,LAMC2,DSP,JUP,LAMA3,PLEC
TF	Factor: E2F-4; motif: NNTTCCCGCCNN; match class: 1	TF:M04823_1	1.03333e-06	19.8843	5.98576	7549	1879	915	18911	KIAA1522,CTSV,LAMA5,CELSR1,SHTN1,RIPK4,KRT80,BAIAP2L1,RHPN2,DDX27,WWC1,PPL,BAIAP2,MAL2,TLCD1,PLPP2,PIP4K2C,P2RY2,BCAM,PLEKHG3,PDGFB,RASEF,SPR,ELF3,MYO5B,EEF1A2,EPCAM,ARHGEF16,EPB41L1,PAK4,GRB7,WFDC2,PTPRF,PATJ,WNT7B,AIF1L,MYH14,TSPAN6,ANKEF1,TFAP2C,SLC39A1,CDS1,LLGL2,FOXA1,B3GNT5,MAP7,PON3,ETNK2,KLC3,VAPB,TSPAN13,SOWAHC,PCDH1,C19ORF33,PMEPA1,ESRP2,STARD10,ACOT4,KRT7,AGRN,EFNA5,KIAA0895,ST6GALNAC2…
TF	Factor: MRF4; motif: CASCTGC	TF:M03831	1.04924e-06	19.8622	5.97913	8302	486	297	18911	TSPAN15,KIAA1522,LAMA5,KRT8,CELSR1,TUFT1,SHTN1,RIPK4,TMEM184A,KRT18,RHPN2,HSPA1A,HSPA1B,DDX27,WWC1,PPL,DDR1,CLDN4,FAM241B,ADGRG1,MAL2,TOM1L1,PIP4K2C,FAM83H,IGSF3,P2RY2,BCAM,PKP3,CHMP4C,RASEF,CCNJL,SPR,ELF3,MYO5B,EEF1A2,EPCAM,ARHGEF16,NHLRC1,EPB41L1,GRB7,F11R,WFDC2,PTPRF,PATJ,TNFRSF21,WNT7B,KRT15,TSKU,ARHGAP39,CYB561,PIGT,ANKEF1,TFAP2C,CDS1,LLGL2,FOXA1,KIAA1671,SCNN1A,MAP7,VWA1,ETNK2,IQANK1,KLC3,V…
TF	Factor: HTF4; motif: CASCTGB	TF:M02018	1.04924e-06	19.8622	5.97913	8302	486	297	18911	TSPAN15,KIAA1522,LAMA5,KRT8,CELSR1,TUFT1,SHTN1,RIPK4,TMEM184A,KRT18,RHPN2,HSPA1A,HSPA1B,DDX27,WWC1,PPL,DDR1,CLDN4,FAM241B,ADGRG1,MAL2,TOM1L1,PIP4K2C,FAM83H,IGSF3,P2RY2,BCAM,PKP3,CHMP4C,RASEF,CCNJL,SPR,ELF3,MYO5B,EEF1A2,EPCAM,ARHGEF16,NHLRC1,EPB41L1,GRB7,F11R,WFDC2,PTPRF,PATJ,TNFRSF21,WNT7B,KRT15,TSKU,ARHGAP39,CYB561,PIGT,ANKEF1,TFAP2C,CDS1,LLGL2,FOXA1,KIAA1671,SCNN1A,MAP7,VWA1,ETNK2,IQANK1,KLC3,V…
TF	Factor: ZF5; motif: GGSGCGCGS; match class: 1	TF:M10438_1	1.0496e-06	19.8617	5.97897	14207	2873	2391	18911	TSPAN15,KIAA1522,CTSV,LAMA5,KRT8,CELSR1,TUFT1,SHTN1,RIPK4,TMEM184A,KRT80,KRT18,BAIAP2L1,EFNA1,RHPN2,HSPA1A,MLF1,HSPA1B,DDX27,WWC1,PPL,MAP3K13,CLDN4,FAM241B,BAIAP2,MAL2,TOM1L1,TLCD1,PLPP2,PIP4K2C,FAM83H,IGSF3,P2RY2,BCAM,PKP3,CHMP4C,PLEKHG3,RAB5IF,PDGFB,RASEF,CCNJL,SPR,ELF3,MYO5B,EEF1A2,EPCAM,SDC4,ARHGEF16,NHLRC1,EPB41L1,PAK4,GRB7,F11R,WFDC2,PTPRF,PATJ,TNFRSF21,WNT7B,KRT15,AIF1L,MYH14,CYB561,TSPAN6…
HPA	skin 1; keratinocytes[‚â•Low]	HPA:0460661	1.11226e-06	19.7781	5.95379	5881	1241	486	18911	KIAA1522,TUFT1,RIPK4,BAIAP2L1,HSPA1A,HSPA1B,WWC1,PPL,DDR1,CLDN4,BAIAP2,PIP4K2C,FAM83H,PKP3,CHMP4C,PLEKHG3,PDGFB,RASEF,PRXL2A,ELF3,MYO5B,SDC4,ARHGEF16,EPB41L1,GRB7,F11R,PATJ,TNFRSF21,KRT15,TSKU,MYH14,CYB561,TSPAN6,ANKEF1,TFAP2C,ITGB4,CDS1,KIAA1671,MAP7,KLC3,VAPB,MET,SOWAHC,LYPD3,ESRP1,THRB,EFNA5,SFN,PERP,CEP170B,TACSTD2,CDH1,LAMB3,S100A2,DSG2,CLDN1,CTTN,RCE1,SDC1,FNBP1L,SLC25A13,CARD10,JAG2,TACC2,…
GO:BP	cardiac muscle cell-cardiac muscle cell adhesion	GO:0086042	1.12238e-06	19.765	5.94986	7	385	6	18911	DSG2,DSC2,PKP2,DSP,JUP,CXADR
TF	Factor: GKLF; motif: NNCCMCRCCCN	TF:M12173	1.165e-06	19.7112	5.93367	9608	2854	1675	18911	TSPAN15,KIAA1522,CTSV,LAMA5,KRT8,CELSR1,TUFT1,SHTN1,RIPK4,TMEM184A,KRT18,BAIAP2L1,EFNA1,RHPN2,SOX13,DDX27,WWC1,PPL,CLDN4,FAM241B,BAIAP2,MAL2,TOM1L1,TLCD1,PLPP2,PIP4K2C,FAM83H,IGSF3,P2RY2,BCAM,PKP3,CHMP4C,PDGFB,RASEF,CCNJL,SPR,MYO5B,EEF1A2,EPCAM,SDC4,ARHGEF16,EPB41L1,PAK4,GRB7,F11R,WFDC2,PTPRF,PATJ,TNFRSF21,WNT7B,KRT15,MYH14,CYB561,PIGT,LAPTM4B,ANKEF1,TFAP2C,ITGB4,CDS1,LLGL2,B3GNT5,SCNN1A,VWA1,PON…
TF	Factor: Osx; motif: CCNCCCCCNNN	TF:M07329	1.18198e-06	19.6904	5.92739	6550	2940	1217	18911	TSPAN15,KIAA1522,LAMA5,KRT8,CELSR1,TUFT1,RIPK4,TMEM184A,KRT18,BAIAP2L1,SOX13,WWC1,PPL,DDR1,FAM241B,BAIAP2,PIP4K2C,FAM83H,BCAM,PDGFB,RASEF,EEF1A2,SDC4,ARHGEF16,PAK4,GRB7,PTPRF,WNT7B,MYH14,ARHGAP39,CYB561,LAPTM4B,ANKEF1,TFAP2C,SLC39A1,CDS1,LLGL2,FOXA1,KIAA1671,B3GNT5,VWA1,ETNK2,IQANK1,VAPB,SOWAHC,PCDH1,CGN,MAP3K9,ESRP2,ESRP1,STARD10,AGRN,ST6GALNAC2,CEP170B,TMEM54,S100A2,DSG2,TRIM47,CTTN,BCAP31,RTL8…
GO:BP	reproductive structure development	GO:0048608	1.20555e-06	19.6619	5.91882	450	2339	103	18911	CTSV,KRT8,ADGRG1,PDGFB,WNT7B,TFAP2C,FOXA1,ETNK2,HES1,SDC1,OVOL2,SIX4,INHBB,KRT19,GRHL2,SPINT1,SYCP2,EGFR,DMRTA1,NSDHL,INHA,SPINT2,LFNG,ADAM15,CTNNA1,RHOBTB3,DHCR24,SPATA2,GJB3,ST14,LHX1,SERPINB5,PTK2,PLEKHA1,PHLDA2,ITGB8,FGFR2,PLCD3,FOXC1,WNT4,NR2F2,SRD5A1,PPARG,TGFB2,STK3,MGST1,LGR4,RXRA,GREB1L,C3,TLR5,SOX15,BCL2L1,RAB13,SRC,CEBPB,AKR1C3,CST3,ZP3,GJB2,PLAC1,SERPINA5,STOX2,SEMA3A,PSAP,FZD5,GJB5,T…
TF	Factor: E2F-4; motif: NNTTCCCGCCNN	TF:M04823	1.27404e-06	19.5822	5.89482	12180	1264	956	18911	TSPAN15,KIAA1522,CTSV,LAMA5,CELSR1,TUFT1,SHTN1,RIPK4,KRT80,BAIAP2L1,EFNA1,RHPN2,MLF1,HSPA1B,DDX27,WWC1,PPL,DDR1,CLDN4,FAM241B,BAIAP2,ADGRG1,MAL2,TOM1L1,TLCD1,PLPP2,PIP4K2C,FAM83H,IGSF3,P2RY2,BCAM,PKP3,CHMP4C,PLEKHG3,RAB5IF,PDGFB,RASEF,PRXL2A,CCNJL,SPR,ELF3,MYO5B,EEF1A2,EPCAM,SDC4,ARHGEF16,NHLRC1,EPB41L1,PAK4,GRB7,F11R,WFDC2,PTPRF,PATJ,WNT7B,AIF1L,MYH14,CYB561,TSPAN6,PIGT,ANKEF1,TFAP2C,SLC39A1,CDS…
GO:BP	neurogenesis	GO:0022008	1.37993e-06	19.467	5.86014	1684	1410	196	18911	LAMA5,CELSR1,SHTN1,EFNA1,SOX13,MAP3K13,DDR1,BAIAP2,ADGRG1,SDC4,PAK4,GRB7,PTPRF,TNFRSF21,WNT7B,TSKU,PIGT,FOXA1,MET,ESRP1,THRB,AGRN,EFNA5,HES1,CDH1,CTTN,WNT9A,JAG2,CLMN,SIX4,RAP1GAP,PLS1,WASL,LAMC2,AURKA,ID1,YTHDF1,DLG5,NANOS1,PLK2,NCKAP1,SPINT1,SEMA4B,PARD6B,ITGA3,RASSF10,SPTBN2,ERBB3,LAMA3,MCOLN3,EGFR,RYK,SYT17,COBL,IGSF9,SEMA3E,PARD3,PTK6,MICALL2,ADGRF1,EPHA2,ZNF488,PTPRK,OBSL1,STX3,L1CAM,GNGT1,…
GO:BP	neuron projection development	GO:0031175	1.43451e-06	19.411	5.8433	1017	1149	113	18911	LAMA5,SHTN1,EFNA1,MAP3K13,DDR1,BAIAP2,SDC4,PAK4,GRB7,PTPRF,TNFRSF21,WNT7B,TSKU,EFNA5,HES1,CDH1,CTTN,CLMN,RAP1GAP,PLS1,WASL,LAMC2,AURKA,ID1,YTHDF1,DLG5,PLK2,NCKAP1,SEMA4B,PARD6B,ITGA3,SPTBN2,LAMA3,EGFR,RYK,SYT17,COBL,IGSF9,SEMA3E,PARD3,PTK6,MICALL2,ADGRF1,EPHA2,PTPRK,OBSL1,STX3,L1CAM,LAMB1,ADGRV1,RAC1,CTNNA1,KLK6,CAMSAP3,SCRIB,PRKCZ,APP,SRCIN1,S100A9,FOLR1,SHANK2,DAG1,LMTK2,ERBB2,NTF4,OPHN1,CRABP2…
TF	Factor: myogenin; motif: RGCAGSTG	TF:M00712	1.50571e-06	19.3411	5.82226	6626	486	250	18911	KIAA1522,LAMA5,CELSR1,TUFT1,RIPK4,TMEM184A,KRT80,BAIAP2L1,RHPN2,SOX13,WWC1,PPL,MAP3K13,DDR1,FAM241B,ADGRG1,TOM1L1,TLCD1,FAM83H,IGSF3,BCAM,PLEKHG3,RAB5IF,PRXL2A,SPR,ELF3,MYO5B,EEF1A2,EPCAM,NHLRC1,EPB41L1,PAK4,GRB7,PTPRF,TNFRSF21,WNT7B,KRT15,TSKU,CYB561,PIGT,ANKEF1,TFAP2C,ITGB4,CDS1,KIAA1671,SCNN1A,MAP7,ETNK2,IQANK1,TSPAN13,MET,PCDH1,C19ORF33,MAP3K9,ITGB6,PMEPA1,THRB,KRT7,TRIM16L,EFNA5,SFN,CEP170B,…
GO:BP	biological process involved in interaction with host	GO:0051701	1.51996e-06	19.3275	5.81817	216	1180	40	18911	HSPA1A,HSPA1B,CHMP4C,F11R,VAPB,MET,ITGB6,CDH1,CLDN9,CLDN1,CTNND1,EGFR,NECTIN4,PC,EPHA2,PVR,CXADR,CHMP4B,SCRIB,MID2,NECTIN2,ITGB5,PLSCR1,DAG1,ITGA2,ITCH,KPNA7,CAV2,KRT6A,SLC52A2,LY6E,FUCA2,RXRA,EFNB2,CTSL,BCL2L1,TMPRSS4,SRC,CD46,CHMP3
TF	Factor: Egr-1; motif: GCGCATGCG	TF:M04869	1.5214e-06	19.3262	5.81776	10761	3461	2226	18911	TSPAN15,KIAA1522,CTSV,LAMA5,CELSR1,TUFT1,SHTN1,RIPK4,KRT18,BAIAP2L1,EFNA1,RHPN2,HSPA1A,MLF1,HSPA1B,DDX27,PPL,BAIAP2,MAL2,TLCD1,PLPP2,PIP4K2C,FAM83H,IGSF3,PKP3,PLEKHG3,RAB5IF,PDGFB,RASEF,PRXL2A,CCNJL,SPR,MYO5B,EEF1A2,EPCAM,SDC4,ARHGEF16,NHLRC1,EPB41L1,PAK4,WFDC2,PTPRF,PATJ,TNFRSF21,WNT7B,AIF1L,MYH14,TSPAN6,PIGT,LAPTM4B,TFAP2C,SLC39A1,LLGL2,FOXA1,MAP7,VWA1,ETNK2,IQANK1,KLC3,VAPB,TSPAN13,MET,SOWAHC,…
GO:BP	pattern specification process	GO:0007389	1.61007e-06	19.2444	5.79315	449	4238	159	18911	CELSR1,ADGRG1,WNT7B,FOXA1,HES1,OVOL2,AURKA,LRP5,COBL,HES4,LFNG,ASPH,PBX1,POFUT1,KIF3B,GAS8,FOLR1,HOXC13,NTF4,MID1,LHX1,LMX1B,DNAH5,FGFR2,CELSR2,FOXC1,NR2F2,PCGF2,BHLHE41,CYP26B1,C3,SIX1,PCSK6,GALNT11,HOXC10,WNT3,HOXA3,EDN1,RNF207,IRX2,MESP1,EPB41L5,GRHL3,PLXNA2,ZIC1,PPP2R3A,HOXC11,BHLHE40,CCDC40,IRX4,CCDC103,TDRD5,SEMA3A,HOXB7,FZD5,MESP2,CYP26C1,MDFI,OTX1,WLS,HOXA2,DLL1,RIPPLY3,DKK1,SENP2,C9ORF11…
TF	Factor: LBP-1; motif: NRCCGGTNNNNACCGGYN; match class: 1	TF:M11490_1	1.61573e-06	19.2394	5.79163	5744	3656	1325	18911	TSPAN15,CTSV,CELSR1,TUFT1,SHTN1,RIPK4,TMEM184A,BAIAP2L1,RHPN2,WWC1,PPL,FAM241B,BAIAP2,ADGRG1,TLCD1,PIP4K2C,FAM83H,P2RY2,BCAM,CHMP4C,RASEF,CCNJL,MYO5B,EEF1A2,WFDC2,PTPRF,TNFRSF21,WNT7B,AIF1L,ARHGAP39,CYB561,LAPTM4B,SLC39A1,CDS1,FOXA1,VWA1,ETNK2,IQANK1,TSPAN13,SOWAHC,PCDH1,CGN,ESRP1,ACOT4,KRT7,AGRN,KIAA0895,PERP,TMEM132A,CEP170B,TACSTD2,TMEM30B,LAMB3,CLDN9,CLDN1,BCAP31,RTL8A,SLC25A13,CARD10,C1ORF56…
TF	Factor: WT1; motif: SMCNCCNSC	TF:M01118	1.6408e-06	19.2172	5.78494	6535	925	428	18911	KIAA1522,CTSV,LAMA5,CELSR1,TMEM184A,KRT80,BAIAP2L1,RHPN2,SOX13,MLF1,CLDN4,FAM241B,BAIAP2,TOM1L1,TLCD1,PLPP2,PIP4K2C,FAM83H,IGSF3,PKP3,PLEKHG3,RAB5IF,PDGFB,RASEF,ELF3,MYO5B,EEF1A2,EPCAM,SDC4,ARHGEF16,PAK4,F11R,WFDC2,PATJ,AIF1L,CYB561,LAPTM4B,SLC39A1,CDS1,LLGL2,FOXA1,SCNN1A,ETNK2,IQANK1,VAPB,PCDH1,CGN,MAP3K9,ESRP2,ESRP1,KRT7,AGRN,ST6GALNAC2,CPVL,TMEM132A,CEP170B,HES1,CDH1,TMEM54,AP1M2,LAMB3,S100A2,…
HPA	nasopharynx; respiratory epithelial cells[‚â•Medium]	HPA:0320102	1.69698e-06	19.1686	5.77032	5590	706	282	18911	TSPAN15,KIAA1522,KRT8,TUFT1,KRT18,BAIAP2L1,HSPA1A,HSPA1B,WWC1,PPL,DDR1,FAM241B,BAIAP2,TLCD1,PIP4K2C,CHMP4C,PDGFB,RASEF,PRXL2A,ELF3,MYO5B,SDC4,ARHGEF16,EPB41L1,GRB7,F11R,WFDC2,PATJ,TNFRSF21,TSKU,MYH14,CYB561,TSPAN6,ANKEF1,CDS1,FOXA1,KIAA1671,SCNN1A,MAP7,VAPB,MET,CGN,MAP3K9,ACOT4,KRT7,AGRN,CEP170B,TACSTD2,CDH1,S100A2,DSG2,EPN3,CLDN1,CTTN,BCAP31,SDC1,SLC25A13,CARD10,JAG2,SLPI,TACC2,ABCC3,CLMN,PTPN3,…
GO:BP	neuron development	GO:0048666	1.77036e-06	19.1075	5.75194	1158	1149	124	18911	LAMA5,SHTN1,EFNA1,MAP3K13,DDR1,BAIAP2,SDC4,PAK4,GRB7,PTPRF,TNFRSF21,WNT7B,TSKU,THRB,AGRN,EFNA5,HES1,CDH1,CTTN,CLMN,RAP1GAP,PLS1,WASL,LAMC2,AURKA,ID1,YTHDF1,DLG5,NANOS1,PLK2,NCKAP1,SEMA4B,PARD6B,ITGA3,SPTBN2,LAMA3,EGFR,RYK,SYT17,COBL,IGSF9,SEMA3E,PARD3,PTK6,MICALL2,ADGRF1,EPHA2,PTPRK,OBSL1,STX3,L1CAM,GNGT1,LAMB1,ADGRV1,RAC1,CTNNA1,PBX1,NR2F6,KLK6,CAMSAP3,SCRIB,PRKCZ,APP,SRCIN1,S100A9,FOLR1,SHANK2,…
HPA	thyroid gland	HPA:0590000	1.78132e-06	19.0986	5.74926	6779	706	330	18911	TSPAN15,KIAA1522,KRT8,TUFT1,KRT18,BAIAP2L1,HSPA1A,HSPA1B,WWC1,PPL,DDR1,CLDN4,FAM241B,BAIAP2,TLCD1,PIP4K2C,FAM83H,PKP3,CHMP4C,PLEKHG3,PDGFB,RASEF,PRXL2A,CCNJL,MYO5B,EPCAM,SDC4,ARHGEF16,GRB7,F11R,WFDC2,PATJ,TNFRSF21,TSKU,AIF1L,MYH14,CYB561,TSPAN6,ANKEF1,ITGB4,CDS1,KIAA1671,SCNN1A,MAP7,ETNK2,VAPB,MET,SOWAHC,PCDH1,CGN,MAP3K9,ESRP1,THRB,KRT7,AGRN,EFNA5,CPVL,CEP170B,CDH1,DSG2,EPN3,CTTN,BCAP31,RCE1,FNBP…
HPA	thyroid gland; glandular cells[‚â•Low]	HPA:0590051	1.78132e-06	19.0986	5.74926	6779	706	330	18911	TSPAN15,KIAA1522,KRT8,TUFT1,KRT18,BAIAP2L1,HSPA1A,HSPA1B,WWC1,PPL,DDR1,CLDN4,FAM241B,BAIAP2,TLCD1,PIP4K2C,FAM83H,PKP3,CHMP4C,PLEKHG3,PDGFB,RASEF,PRXL2A,CCNJL,MYO5B,EPCAM,SDC4,ARHGEF16,GRB7,F11R,WFDC2,PATJ,TNFRSF21,TSKU,AIF1L,MYH14,CYB561,TSPAN6,ANKEF1,ITGB4,CDS1,KIAA1671,SCNN1A,MAP7,ETNK2,VAPB,MET,SOWAHC,PCDH1,CGN,MAP3K9,ESRP1,THRB,KRT7,AGRN,EFNA5,CPVL,CEP170B,CDH1,DSG2,EPN3,CTTN,BCAP31,RCE1,FNBP…
TF	Factor: SP1; motif: RCCMCRCCCMC	TF:M03920	1.86648e-06	19.0313	5.72898	7000	2914	1281	18911	TSPAN15,LAMA5,KRT8,CELSR1,TUFT1,SHTN1,RIPK4,TMEM184A,KRT18,BAIAP2L1,EFNA1,RHPN2,DDX27,PPL,DDR1,BAIAP2,MAL2,TOM1L1,PLPP2,PIP4K2C,FAM83H,IGSF3,P2RY2,BCAM,PKP3,CHMP4C,SPR,MYO5B,EEF1A2,EPCAM,SDC4,ARHGEF16,PAK4,GRB7,F11R,WFDC2,PATJ,KRT15,MYH14,CYB561,PIGT,LAPTM4B,ANKEF1,TFAP2C,ITGB4,CDS1,LLGL2,B3GNT5,VWA1,ETNK2,IQANK1,KLC3,VAPB,TSPAN13,MET,SOWAHC,PCDH1,C19ORF33,LYPD3,CGN,MAP3K9,ESRP2,ESRP1,KRT7,AGRN,C…
TF	Factor: Egr-2; motif: GNGRRNGWGKGGGNGGRG	TF:M09898	1.89521e-06	19.0092	5.72234	6217	2366	954	18911	CTSV,LAMA5,KRT8,KRT18,BAIAP2L1,RHPN2,MLF1,WWC1,PPL,DDR1,FAM241B,BAIAP2,TLCD1,PLPP2,PIP4K2C,P2RY2,BCAM,PKP3,PLEKHG3,RAB5IF,CCNJL,EEF1A2,ARHGEF16,PAK4,GRB7,PATJ,KRT15,AIF1L,MYH14,CYB561,TSPAN6,LAPTM4B,ANKEF1,SLC39A1,CDS1,FOXA1,KIAA1671,B3GNT5,VWA1,ETNK2,KLC3,TSPAN13,SOWAHC,PCDH1,CGN,PMEPA1,ESRP2,ESRP1,KRT7,AGRN,KIAA0895,ST6GALNAC2,CEP170B,HES1,TMEM54,DSG2,CTTN,BCAP31,PRSS22,SYT12,FNBP1L,SLC25A13,CA…
TF	Factor: Slug; motif: SSSNNNKCACCTGN; match class: 1	TF:M07367_1	2.09159e-06	18.867	5.67952	135	531	22	18911	KIAA1522,WWC1,FAM241B,TOM1L1,FAM83H,IQANK1,TSPAN13,SOWAHC,ESRP2,LSR,RGL3,KDF1,PLEK2,LRP5,EPPK1,OSBPL2,SPINT2,ARL4A,CAMSAP3,RASSF7,ELOVL7,CADM4
TF	Factor: ctcf; motif: NNNCCASYAGRKGGCRSYNN	TF:M09602	2.10224e-06	18.8596	5.67732	7113	1070	524	18911	KIAA1522,LAMA5,KRT8,CELSR1,TMEM184A,KRT18,BAIAP2L1,SOX13,WWC1,PPL,FAM241B,BAIAP2,ADGRG1,TOM1L1,TLCD1,PLPP2,IGSF3,P2RY2,BCAM,PKP3,PLEKHG3,RAB5IF,PDGFB,RASEF,CCNJL,SPR,ELF3,MYO5B,ARHGEF16,EPB41L1,GRB7,F11R,WFDC2,TNFRSF21,KRT15,TSKU,AIF1L,CYB561,TSPAN6,LAPTM4B,ITGB4,LLGL2,FOXA1,KIAA1671,SCNN1A,MAP7,ETNK2,VAPB,MET,SOWAHC,PCDH1,CGN,MAP3K9,ESRP2,ESRP1,STARD10,ACOT4,KRT7,AGRN,TRIM16L,SFN,YIPF6,ST6GALNAC…
TF	Factor: FXR; motif: NRGGKCANTGRCCNNNNGG	TF:M10014	2.108e-06	18.8557	5.67613	5373	1659	614	18911	KIAA1522,KRT8,KRT18,BAIAP2L1,SOX13,HSPA1A,MLF1,PPL,CLDN4,BAIAP2,PLPP2,PIP4K2C,BCAM,PKP3,MYO5B,EEF1A2,EPCAM,SDC4,PAK4,F11R,PTPRF,TNFRSF21,WNT7B,ARHGAP39,CYB561,SLC39A1,LLGL2,FOXA1,VWA1,PON3,ETNK2,TSPAN13,PCDH1,MAP3K9,ESRP2,AGRN,KIAA0895,TMEM132A,CEP170B,TMEM54,DSG2,TRIM47,CLDN9,BCAP31,PRSS22,SDC1,SYT12,FNBP1L,SLC25A13,CARD10,WNT9A,C6ORF141,TACC2,GET4,CLMN,SSH3,TMPRSS13,GPRC5C,CDC42BPG,TJP1,MARVELD…
REAC	Cell death signalling via NRAGE, NRIF and NADE	REAC:R-HSA-204998	2.53879e-06	18.5874	5.59537	76	3249	35	18911	ARHGEF16,ARHGEF5,RAC1,ARHGEF35,ECT2,SQSTM1,PSEN2,PSENEN,ARHGEF37,ARHGEF26,ARHGEF10L,VAV2,APH1A,ARHGEF19,KALRN,PLEKHG5,MCF2L,BEX3,NGEF,BAD,TRIO,NET1,ARHGEF17,ITSN1,FGD4,ARHGEF38,ARHGEF12,PSEN1,ARHGEF3,UBC,ARHGEF4,NGFR,ARHGEF33,ARHGEF39,ARHGEF11
GO:CC	desmosome	GO:0030057	2.57784e-06	18.5654	5.58874	25	281	9	18911	PPL,PKP3,PERP,DSG2,DSC2,PKP2,DSP,JUP,EVPL
TF	Factor: EGR1; motif: NGNGKGGGYGGNGS	TF:M09761	2.62632e-06	18.5385	5.58065	4971	3503	1113	18911	TSPAN15,KIAA1522,CTSV,KRT8,KRT18,BAIAP2L1,EFNA1,RHPN2,WWC1,PPL,BAIAP2,MAL2,PLPP2,FAM83H,P2RY2,BCAM,PDGFB,RASEF,EEF1A2,SDC4,ARHGEF16,PAK4,GRB7,PTPRF,PATJ,WNT7B,CYB561,LAPTM4B,ANKEF1,TFAP2C,SLC39A1,CDS1,KIAA1671,B3GNT5,ETNK2,IQANK1,TSPAN13,SOWAHC,PCDH1,C19ORF33,ESRP2,KRT7,AGRN,ST6GALNAC2,CEP170B,CTTN,SDC1,FNBP1L,CARD10,WNT9A,JAG2,OVOL2,ATP1B1,ABCC3,CLMN,PTPN3,GPRC5C,CDC42BPG,TJP1,CMTM4,SHB,DSC2,SLC…
TF	Factor: TFAP2C; motif: NGCCCNNRGGCA; match class: 1	TF:M04152_1	2.74495e-06	18.4748	5.56147	5332	2774	964	18911	KIAA1522,CTSV,LAMA5,CELSR1,SHTN1,RIPK4,KRT80,EFNA1,SOX13,HSPA1A,PPL,CLDN4,BAIAP2,P2RY2,PLEKHG3,PDGFB,RASEF,SPR,ELF3,MYO5B,EEF1A2,EPB41L1,F11R,WFDC2,WNT7B,KRT15,MYH14,ARHGAP39,CYB561,PIGT,LAPTM4B,TFAP2C,SLC39A1,ITGB4,LLGL2,KIAA1671,MAP7,ETNK2,KLC3,SOWAHC,PCDH1,C19ORF33,LYPD3,ACOT4,KIAA0895,TMEM132A,CEP170B,HES1,TMEM54,S100A2,DSG2,TRIM47,BCAP31,PRSS22,RCE1,SDC1,SYT12,FNBP1L,CARD10,C1ORF56,WNT9A,JAG…
TF	Factor: E2F-1; motif: TTTGGCGCCAAA; match class: 1	TF:M04516_1	3.12643e-06	18.2871	5.50495	9806	1251	786	18911	KIAA1522,CTSV,LAMA5,KRT8,CELSR1,TUFT1,SHTN1,RIPK4,TMEM184A,KRT18,EFNA1,RHPN2,DDX27,WWC1,PPL,FAM241B,BAIAP2,MAL2,TOM1L1,TLCD1,PLPP2,PIP4K2C,FAM83H,IGSF3,P2RY2,PKP3,CHMP4C,PLEKHG3,RAB5IF,PDGFB,RASEF,CCNJL,SPR,MYO5B,EEF1A2,EPCAM,SDC4,ARHGEF16,PAK4,F11R,WFDC2,PTPRF,PATJ,TNFRSF21,WNT7B,AIF1L,MYH14,CYB561,TSPAN6,LAPTM4B,ANKEF1,SLC39A1,ITGB4,CDS1,LLGL2,FOXA1,B3GNT5,SCNN1A,MAP7,PON3,IQANK1,SOWAHC,PCDH1,C…
TF	Factor: LBP-1; motif: NRCCGGTNNNNACCGGYN	TF:M11490	3.20192e-06	18.2526	5.49459	6468	3656	1474	18911	TSPAN15,CTSV,CELSR1,TUFT1,SHTN1,RIPK4,TMEM184A,BAIAP2L1,RHPN2,WWC1,PPL,FAM241B,BAIAP2,ADGRG1,TLCD1,PIP4K2C,FAM83H,P2RY2,BCAM,CHMP4C,PLEKHG3,RASEF,CCNJL,MYO5B,EEF1A2,EPB41L1,WFDC2,PTPRF,TNFRSF21,WNT7B,AIF1L,ARHGAP39,CYB561,LAPTM4B,SLC39A1,CDS1,FOXA1,SCNN1A,VWA1,ETNK2,IQANK1,TSPAN13,SOWAHC,PCDH1,CGN,PMEPA1,ESRP2,ESRP1,ACOT4,KRT7,AGRN,KIAA0895,PERP,TMEM132A,CEP170B,TACSTD2,TMEM30B,TMEM54,LAMB3,CLDN9…
TF	Factor: E2F-1; motif: WWTGGCGCCAAA; match class: 1	TF:M04515_1	3.24963e-06	18.2313	5.48817	11664	1870	1329	18911	KIAA1522,CTSV,LAMA5,KRT8,CELSR1,TUFT1,SHTN1,RIPK4,TMEM184A,KRT18,EFNA1,RHPN2,HSPA1A,DDX27,WWC1,PPL,CLDN4,FAM241B,BAIAP2,MAL2,TOM1L1,TLCD1,PLPP2,PIP4K2C,FAM83H,IGSF3,P2RY2,PKP3,CHMP4C,PLEKHG3,RAB5IF,PDGFB,RASEF,CCNJL,SPR,MYO5B,EEF1A2,EPCAM,SDC4,ARHGEF16,NHLRC1,PAK4,F11R,WFDC2,PTPRF,PATJ,TNFRSF21,WNT7B,AIF1L,MYH14,CYB561,TSPAN6,LAPTM4B,ANKEF1,TFAP2C,SLC39A1,ITGB4,CDS1,LLGL2,FOXA1,B3GNT5,SCNN1A,MAP7…
TF	Factor: E2F-1; motif: NNNNGGCGGGAARN	TF:M09892	3.41787e-06	18.1585	5.46624	12924	1602	1255	18911	TSPAN15,KIAA1522,CTSV,LAMA5,CELSR1,TUFT1,SHTN1,RIPK4,KRT80,BAIAP2L1,EFNA1,RHPN2,HSPA1A,MLF1,HSPA1B,DDX27,WWC1,PPL,DDR1,CLDN4,FAM241B,BAIAP2,ADGRG1,MAL2,TOM1L1,TLCD1,PLPP2,PIP4K2C,FAM83H,IGSF3,P2RY2,BCAM,PKP3,CHMP4C,PLEKHG3,RAB5IF,PDGFB,RASEF,PRXL2A,CCNJL,SPR,ELF3,MYO5B,EEF1A2,EPCAM,SDC4,ARHGEF16,NHLRC1,EPB41L1,PAK4,GRB7,F11R,WFDC2,PTPRF,PATJ,WNT7B,AIF1L,MYH14,CYB561,TSPAN6,PIGT,ANKEF1,TFAP2C,SLC3…
TF	Factor: E2F-7; motif: GRGGCGGGAANNN	TF:M09896	3.57308e-06	18.0944	5.44696	9519	1875	1116	18911	TSPAN15,KIAA1522,CTSV,LAMA5,CELSR1,TUFT1,SHTN1,RIPK4,KRT80,BAIAP2L1,RHPN2,HSPA1A,DDX27,WWC1,PPL,DDR1,FAM241B,BAIAP2,ADGRG1,MAL2,TLCD1,PLPP2,PIP4K2C,FAM83H,P2RY2,PKP3,CHMP4C,PLEKHG3,RAB5IF,PDGFB,RASEF,PRXL2A,CCNJL,SPR,ELF3,MYO5B,EEF1A2,SDC4,ARHGEF16,NHLRC1,EPB41L1,PAK4,GRB7,F11R,WFDC2,PTPRF,WNT7B,AIF1L,MYH14,TSPAN6,ANKEF1,TFAP2C,SLC39A1,CDS1,LLGL2,FOXA1,B3GNT5,MAP7,ETNK2,IQANK1,KLC3,VAPB,MET,SOWAH…
TF	Factor: Sp4; motif: SCCCCKCCCCCSN; match class: 1	TF:M07617_1	3.59407e-06	18.086	5.44441	869	2841	207	18911	LAMA5,CELSR1,FAM83H,EEF1A2,ARHGEF16,IQANK1,AGRN,CEP170B,FNBP1L,JAG2,CDC42BPG,TJP1,SHB,SLC2A4RG,GRHL1,RAP1GAP,PKP2,G6PD,TBC1D8,SPIRE2,KDF1,GIPC1,TMEM40,NUDT14,PLEKHA7,PPFIA1,HID1,IL13RA1,PFKFB2,MRGBP,TSEN34,LTBP3,MICALL2,PXN,TNKS1BP1,GRTP1,GNG4,ARHGAP29,LFNG,CDC42BPB,NR2F6,CAMSAP3,SRXN1,RNF114,NECTIN2,SIK1B,TEAD3,YES1,CADM4,PPP1R13B,CD276,RAE1,DSTN,GPRC5B,TNFRSF12A,TEAD4,MYZAP,LRP11,EPS8L2,DBNDD1,…
TF	Factor: ZNF460; motif: NNACNCCCCCCNN	TF:M12313	3.64017e-06	18.0676	5.43888	5622	3544	1253	18911	KIAA1522,CELSR1,SHTN1,RIPK4,WWC1,PPL,MAP3K13,BAIAP2,ADGRG1,TOM1L1,PLPP2,PIP4K2C,FAM83H,PKP3,PDGFB,RASEF,CCNJL,SPR,EEF1A2,ARHGEF16,PAK4,GRB7,PTPRF,MYH14,TSPAN6,LAPTM4B,CDS1,LLGL2,SCNN1A,ETNK2,IQANK1,KLC3,VAPB,SOWAHC,PCDH1,MAP3K9,PMEPA1,AGRN,CEP170B,HES1,TACSTD2,CDH1,TMEM54,AP1M2,DSG2,BCAP31,SDC1,CARD10,JAG2,OVOL2,STYK1,PTPN3,SSH3,LSR,GPRC5C,CDC42BPG,PRPF6,TGFA,SHB,ZNF205,SIX4,STAU1,SLC2A4RG,GRHL1,…
TF	Factor: PUR1; motif: GGGNCAGNN	TF:M01721	3.7527e-06	18.0236	5.42566	8731	2202	1207	18911	TSPAN15,KIAA1522,CTSV,LAMA5,KRT8,CELSR1,SHTN1,TMEM184A,KRT80,BAIAP2L1,EFNA1,WWC1,PPL,DDR1,FAM241B,BAIAP2,ADGRG1,TOM1L1,TLCD1,PLPP2,PIP4K2C,IGSF3,P2RY2,BCAM,PKP3,CHMP4C,PDGFB,PRXL2A,CCNJL,SPR,ELF3,EEF1A2,EPCAM,ARHGEF16,NHLRC1,EPB41L1,PAK4,GRB7,WFDC2,PTPRF,PATJ,TNFRSF21,WNT7B,KRT15,AIF1L,MYH14,CYB561,TSPAN6,LAPTM4B,ANKEF1,SLC39A1,ITGB4,CDS1,LLGL2,FOXA1,SCNN1A,ETNK2,KLC3,MET,PCDH1,C19ORF33,LYPD3,CGN…
TF	Factor: ZNF614; motif: NCYCWGCCYYNNN; match class: 1	TF:M09862_1	3.9631e-06	17.9449	5.40196	4022	3467	913	18911	CELSR1,TMEM184A,KRT80,BAIAP2L1,EFNA1,WWC1,PPL,DDR1,TLCD1,FAM83H,P2RY2,BCAM,PLEKHG3,PDGFB,CCNJL,SPR,EEF1A2,SDC4,ARHGEF16,GRB7,PTPRF,PATJ,TNFRSF21,WNT7B,CYB561,ANKEF1,TFAP2C,CDS1,LLGL2,B3GNT5,SCNN1A,VWA1,KLC3,SOWAHC,PCDH1,C19ORF33,MAP3K9,PMEPA1,AGRN,EFNA5,ST6GALNAC2,CEP170B,LAMB3,CTTN,SYT12,FNBP1L,JAG2,ZNF185,ATP1B1,CLMN,SSH3,LSR,GPRC5C,CDC42BPG,PRPF6,TJP1,CMTM4,SHB,SLC2A4RG,PPP1R26,RAP1GAP,REPS2,P…
GO:BP	generation of neurons	GO:0048699	3.99251e-06	17.9343	5.39875	1563	1182	159	18911	LAMA5,CELSR1,SHTN1,EFNA1,MAP3K13,DDR1,BAIAP2,ADGRG1,SDC4,PAK4,GRB7,PTPRF,TNFRSF21,WNT7B,TSKU,PIGT,FOXA1,MET,ESRP1,THRB,AGRN,EFNA5,HES1,CDH1,CTTN,WNT9A,JAG2,CLMN,SIX4,RAP1GAP,PLS1,WASL,LAMC2,AURKA,ID1,YTHDF1,DLG5,NANOS1,PLK2,NCKAP1,SPINT1,SEMA4B,PARD6B,ITGA3,RASSF10,SPTBN2,LAMA3,MCOLN3,EGFR,RYK,SYT17,COBL,IGSF9,SEMA3E,PARD3,PTK6,MICALL2,ADGRF1,EPHA2,ZNF488,PTPRK,OBSL1,STX3,L1CAM,GNGT1,LAMB1,MYO6,D…
GO:BP	cell-substrate junction assembly	GO:0007044	4.1263e-06	17.8867	5.38444	101	584	18	18911	SDC4,ITGB4,EFNA5,LAMB3,CTTN,LAMC2,LAMA3,PLEC,LIMCH1,PTPRK,DUSP3,RHOD,RAC1,DST,CAMSAP3,PHLDB2,S100A10,ITGA2
GO:BP	embryonic morphogenesis	GO:0048598	4.17024e-06	17.8714	5.37984	604	4969	228	18911	LAMA5,CELSR1,EFNA1,SDC4,WNT7B,SLC39A1,ITGB4,HES1,LAMB3,WNT9A,JAG2,OVOL2,SIX4,PLS1,TFAP2A,GRHL2,SPINT1,KDF1,ITGA3,LAMA3,LRP5,COBL,EPHA2,SPINT2,ALDH1A3,LAMB1,MYO6,PBX1,SCRIB,ITGB5,PHLDB2,FOLR1,DAG1,ITGA2,LRIG3,DUSP4,CRABP2,ST14,ATP6V1B1,MMP15,LHX1,FGFR2,FOXC1,WNT4,SOX2,PCGF2,TGFB2,STK3,KLF4,FZD6,CYP26B1,ELF5,YAP1,SIX1,EPHB2,SLC9A3R1,HOXC10,WNT3,SEMA4C,HOXA3,EDN1,RNF207,EYA2,IRX2,MESP1,EPB41L5,B9D1,…
GO:BP	protein localization to plasma membrane	GO:0072659	4.20285e-06	17.8602	5.37646	284	1202	47	18911	TSPAN15,LAMA5,KRT18,PKP3,ARHGEF16,NHLRC1,F11R,MAP7,CDH1,ATP1B1,PLS1,PKP2,SYS1,JUP,ITGA3,EGFR,PPFIA1,EPHA2,STX3,EMP2,AGR2,SCRIB,ACSL3,PRKCZ,CRB3,S100A10,SQSTM1,SLC9A3R2,RDX,ANK3,ATP2C2,KCNIP3,WDR72,AFDN,GRIP1,BCL2L1,LYPD1,EPHB2,RAB13,SLC9A3R1,LGALS3,RAB12,FCHO2,SMURF1,PRKCI,RAB15,MPP5
HPA	bronchus; respiratory epithelial cells[‚â•Medium]	HPA:0060102	4.24085e-06	17.8472	5.37255	5830	2010	741	18911	TSPAN15,KIAA1522,KRT8,KRT18,BAIAP2L1,HSPA1A,HSPA1B,PPL,DDR1,CLDN4,FAM241B,BAIAP2,TLCD1,PIP4K2C,FAM83H,CHMP4C,PLEKHG3,PDGFB,RASEF,PRXL2A,CCNJL,ELF3,MYO5B,SDC4,ARHGEF16,EPB41L1,GRB7,F11R,WFDC2,PATJ,TNFRSF21,KRT15,MYH14,TSPAN6,CDS1,FOXA1,KIAA1671,SCNN1A,MAP7,VAPB,MET,SOWAHC,CGN,ESRP1,ACOT4,KRT7,AGRN,EFNA5,TMEM132A,CEP170B,TACSTD2,CDH1,S100A2,DSG2,EPN3,CLDN1,CTTN,BCAP31,RCE1,SDC1,FNBP1L,SLC25A13,CARD…
GO:BP	nervous system development	GO:0007399	4.54645e-06	17.7468	5.34233	2429	3958	639	18911	CTSV,LAMA5,CELSR1,SHTN1,EFNA1,SOX13,MAP3K13,DDR1,BAIAP2,ADGRG1,MAL2,SDC4,PAK4,GRB7,PTPRF,TNFRSF21,WNT7B,TSKU,PIGT,FOXA1,B3GNT5,MET,PCDH1,ESRP1,THRB,AGRN,EFNA5,HES1,CDH1,CLDN1,CTTN,WNT9A,JAG2,TACC2,OVOL2,CLMN,LSR,SIX4,RAP1GAP,PLS1,TFAP2A,WASL,LAMC2,G6PD,CTNND1,AURKA,GRHL2,ID1,YTHDF1,DLG5,NANOS1,PLK2,NCKAP1,SPINT1,SEMA4B,PARD6B,ITGA3,RASSF10,SPTBN2,ERBB3,LAMA3,SEZ6L2,MCOLN3,SLC6A11,CLDN3,EGFR,RYK,S…
HPA	stomach 1; glandular cells[‚â•Medium]	HPA:0540052	4.62311e-06	17.7227	5.33507	6038	1186	473	18911	TSPAN15,KIAA1522,KRT8,TUFT1,RIPK4,KRT18,BAIAP2L1,HSPA1A,WWC1,DDR1,FAM241B,BAIAP2,TLCD1,PIP4K2C,FAM83H,CHMP4C,PDGFB,RASEF,CCNJL,MYO5B,SDC4,ARHGEF16,EPB41L1,GRB7,F11R,PATJ,TNFRSF21,TSKU,MYH14,CYB561,TSPAN6,ANKEF1,CDS1,FOXA1,KIAA1671,SCNN1A,MAP7,VAPB,MET,PCDH1,CGN,MAP3K9,ESRP1,AGRN,EFNA5,CDH1,LAMB3,DSG2,EPN3,CTTN,BCAP31,RCE1,SDC1,FNBP1L,SLC25A13,CARD10,JAG2,TACC2,STYK1,ABCC3,CLMN,PTPN3,SSH3,LSR,GPRC…
HPA	colon; glandular cells[‚â•Medium]	HPA:0130052	4.78609e-06	17.6727	5.32002	6118	1082	440	18911	TSPAN15,KIAA1522,KRT8,TUFT1,KRT18,BAIAP2L1,HSPA1A,WWC1,DDR1,CLDN4,BAIAP2,TLCD1,PIP4K2C,FAM83H,CHMP4C,PLEKHG3,PDGFB,RASEF,PRXL2A,CCNJL,ELF3,MYO5B,EPCAM,SDC4,ARHGEF16,EPB41L1,GRB7,F11R,WFDC2,PATJ,KRT15,TSKU,MYH14,CYB561,TSPAN6,ANKEF1,ITGB4,KIAA1671,SCNN1A,MAP7,VAPB,MET,SOWAHC,PCDH1,CGN,MAP3K9,ITGB6,ESRP1,AGRN,EFNA5,CEP170B,CDH1,DSG2,EPN3,CTTN,BCAP31,RCE1,SDC1,FNBP1L,SLC25A13,CARD10,JAG2,TACC2,STYK1…
GO:BP	morphogenesis of a branching epithelium	GO:0061138	4.79967e-06	17.6686	5.31879	185	3903	75	18911	LAMA5,CELSR1,DDR1,FOXA1,MET,ESRP2,TACSTD2,SIX4,GRHL2,DLG5,SPINT1,LRP5,SEMA3E,EPHA2,SPINT2,PBX1,DAG1,ST14,LHX1,MDK,AREG,FGFR2,PLXNA1,WNT4,LGR4,RXRA,GREB1L,NTN4,YAP1,SIX1,SRC,CTSH,EDN1,NPNT,TGM2,SEMA3A,PDGFA,HOXB7,ADAMTS16,FZD5,SOX9,SEMA3C,BMP7,SIX2,HOXD11,CTNNBIP1,NRP1,VANGL2,WNT6,EGF,SOCS3,NRARP,VDR,EXT1,KDM5B,DLG1,MSX2,PPP1CA,ACVR1,GBX2,ADM,FKBPL,LRP6,SPRY1,TNC,TP63,CTSZ,SHH,BMP2,PGR,HOXD13,EYA1…
HPA	oral mucosa	HPA:0330000	4.84637e-06	17.6547	5.31458	5961	706	295	18911	KIAA1522,TUFT1,RIPK4,BAIAP2L1,HSPA1A,HSPA1B,WWC1,PPL,DDR1,CLDN4,FAM241B,BAIAP2,TLCD1,PIP4K2C,FAM83H,PKP3,PLEKHG3,PDGFB,RASEF,PRXL2A,CCNJL,ELF3,MYO5B,EEF1A2,SDC4,ARHGEF16,EPB41L1,GRB7,F11R,PATJ,TNFRSF21,KRT15,MYH14,TSPAN6,ANKEF1,TFAP2C,ITGB4,CDS1,FOXA1,KIAA1671,SCNN1A,MAP7,VAPB,MET,SOWAHC,PCDH1,LYPD3,ESRP1,EFNA5,SFN,CEP170B,TACSTD2,CDH1,LAMB3,S100A2,DSG2,EPN3,CLDN1,CTTN,RCE1,SDC1,FNBP1L,SLC25A13,C…
HPA	oral mucosa; squamous epithelial cells[‚â•Low]	HPA:0330221	4.84637e-06	17.6547	5.31458	5961	706	295	18911	KIAA1522,TUFT1,RIPK4,BAIAP2L1,HSPA1A,HSPA1B,WWC1,PPL,DDR1,CLDN4,FAM241B,BAIAP2,TLCD1,PIP4K2C,FAM83H,PKP3,PLEKHG3,PDGFB,RASEF,PRXL2A,CCNJL,ELF3,MYO5B,EEF1A2,SDC4,ARHGEF16,EPB41L1,GRB7,F11R,PATJ,TNFRSF21,KRT15,MYH14,TSPAN6,ANKEF1,TFAP2C,ITGB4,CDS1,FOXA1,KIAA1671,SCNN1A,MAP7,VAPB,MET,SOWAHC,PCDH1,LYPD3,ESRP1,EFNA5,SFN,CEP170B,TACSTD2,CDH1,LAMB3,S100A2,DSG2,EPN3,CLDN1,CTTN,RCE1,SDC1,FNBP1L,SLC25A13,C…
GO:BP	bundle of His cell-Purkinje myocyte adhesion involved in cell communication	GO:0086073	4.85288e-06	17.6527	5.314	6	244	5	18911	DSG2,DSC2,PKP2,DSP,JUP
GO:BP	cell morphogenesis involved in differentiation	GO:0000904	4.96091e-06	17.621	5.30444	763	2245	147	18911	LAMA5,SHTN1,EFNA1,MAP3K13,BAIAP2,GRB7,TSKU,MET,EFNA5,HES1,TACSTD2,LAMB3,CTTN,RAP1GAP,PLS1,WASL,LAMC2,GRHL2,ID1,YTHDF1,SEMA4B,PARD6B,SPTBN2,LAMA3,CLDN3,RYK,COBL,IGSF9,SEMA3E,PARD3,MICALL2,PXN,EPHA2,OBSL1,L1CAM,SPINT2,RAB25,LAMB1,RAC1,CARMIL1,SCRIB,APP,SRCIN1,S100A10,SHANK2,DAG1,LMTK2,ERBB2,OPHN1,CRABP2,TMEM106B,B4GALT5,ST14,ANK3,LHX1,SKIL,PLA2G10,MDK,PTK2,FGFR2,ATRN,ARTN,PLXNA1,NEDD4L,CELSR2,PIK3C…
GO:BP	entry into host	GO:0044409	5.17014e-06	17.5614	5.2865	150	1151	31	18911	HSPA1A,HSPA1B,F11R,MET,ITGB6,CDH1,CLDN9,CLDN1,CTNND1,EGFR,NECTIN4,EPHA2,PVR,CXADR,MID2,NECTIN2,ITGB5,PLSCR1,DAG1,ITGA2,ITCH,CAV2,KRT6A,SLC52A2,LY6E,FUCA2,EFNB2,CTSL,TMPRSS4,SRC,CD46
GO:CC	endoplasmic reticulum	GO:0005783	5.64835e-06	17.4337	5.24808	1919	4150	547	18911	TSPAN15,HSPA1A,HSPA1B,BAIAP2,PLPP2,PDGFB,NHLRC1,WNT7B,PIGT,SLC39A1,CDS1,VWA1,VAPB,YIPF6,TMEM132A,TMEM30B,BCAP31,RCE1,TGFA,GRAMD2A,HM13,STAU1,EPHX1,CAPN2,VMP1,DPM1,GPAT3,ALG1L,GOLM1,SPTSSB,LAMA3,SEZ6L2,POR,EGFR,LRP5,ALDH3A2,NSDHL,GOLT1A,TMEM189,PTGES,PIGU,LAMB1,AGR2,ASPH,CLU,RAC1,DST,CNIH4,KLK6,POFUT1,CYP1A1,ACSL3,ZDHHC9,ELOVL7,APP,DHCR24,TPD52,CREG2,FOLR1,S100A10,SQSTM1,PDCD6,SLC35A2,ARHGAP32,SUL…
GO:BP	neuron differentiation	GO:0030182	5.91929e-06	17.3661	5.22773	1418	1484	175	18911	LAMA5,SHTN1,EFNA1,MAP3K13,DDR1,BAIAP2,SDC4,PAK4,GRB7,PTPRF,TNFRSF21,WNT7B,TSKU,PIGT,FOXA1,MET,ESRP1,THRB,AGRN,EFNA5,HES1,CDH1,CTTN,WNT9A,JAG2,CLMN,RAP1GAP,PLS1,WASL,LAMC2,AURKA,ID1,YTHDF1,DLG5,NANOS1,PLK2,NCKAP1,SEMA4B,PARD6B,ITGA3,SPTBN2,LAMA3,MCOLN3,EGFR,RYK,SYT17,COBL,IGSF9,SEMA3E,PARD3,PTK6,MICALL2,ADGRF1,EPHA2,PTPRK,OBSL1,STX3,L1CAM,GNGT1,LAMB1,MYO6,ADGRV1,RAC1,CTNNA1,PBX1,NR2F6,KLK6,CAMSAP3…
HP	Palmoplantar keratoderma	HP:0000982	6.3008e-06	17.276	5.2006	146	3655	59	18911	ITGB4,PERP,LAMB3,DSG2,DSC2,LAMC2,DSP,JUP,LAMA3,CARD14,GJB3,PSEN2,KRT17,BAG3,KRT6A,FGFR2,FERMT1,SLCO2A1,KRT83,KRT16,CAST,NEBL,COL17A1,KRT5,DOLK,GJB2,CAP2,PKP1,WNT10A,RHBDF2,ABCA12,NIPAL4,GJB6,FHL2,ATP2A2,TNNT2,SLURP1,SDHA,HPGD,TPM1,AQP5,KRT6B,PSEN1,AAGAB,KRT9,TCAP,PEPD,TNNI3,ALOXE3,SDHC,TRPM4,SEC23B,ANKRD1,PPCS,KRT10,TP63,GJB4,KRT6C,TGM1
HPA	small intestine; glandular cells[‚â•Medium]	HPA:0480052	6.35928e-06	17.2627	5.19659	6278	1243	509	18911	TSPAN15,KIAA1522,KRT8,TUFT1,KRT18,BAIAP2L1,HSPA1A,WWC1,DDR1,CLDN4,BAIAP2,TLCD1,PIP4K2C,CHMP4C,PLEKHG3,PDGFB,RASEF,PRXL2A,CCNJL,ELF3,MYO5B,EPCAM,SDC4,ARHGEF16,GRB7,F11R,PATJ,TNFRSF21,MYH14,CYB561,TSPAN6,ANKEF1,ITGB4,CDS1,KIAA1671,SCNN1A,MAP7,VAPB,MET,SOWAHC,PCDH1,CGN,MAP3K9,ITGB6,ESRP1,AGRN,EFNA5,CEP170B,CDH1,LAMB3,DSG2,EPN3,CTTN,BCAP31,RCE1,SDC1,FNBP1L,SLC25A13,CARD10,JAG2,TACC2,STYK1,ATP1B1,ABCC…
GO:CC	apicolateral plasma membrane	GO:0016327	6.48292e-06	17.2349	5.18823	21	385	9	18911	KRT8,CLDN4,TJP1,KRT19,JUP,CLDN3,OCLN,EPPK1,CXADR
HPA	vagina; squamous epithelial cells[‚â•Low]	HPA:0620221	6.52531e-06	17.2255	5.1854	5716	674	273	18911	TSPAN15,KIAA1522,TUFT1,BAIAP2L1,HSPA1A,HSPA1B,WWC1,PPL,DDR1,CLDN4,FAM241B,BAIAP2,PIP4K2C,FAM83H,PKP3,PLEKHG3,PDGFB,RASEF,PRXL2A,CCNJL,ELF3,MYO5B,SDC4,ARHGEF16,EPB41L1,GRB7,F11R,PATJ,TNFRSF21,KRT15,TSKU,MYH14,CYB561,TSPAN6,ANKEF1,TFAP2C,ITGB4,KIAA1671,SCNN1A,MAP7,ETNK2,KLC3,VAPB,MET,SOWAHC,PCDH1,LYPD3,CGN,ESRP1,AGRN,EFNA5,SFN,CEP170B,TACSTD2,CDH1,LAMB3,S100A2,DSG2,CLDN1,CTTN,RCE1,SDC1,SLC25A13,CAR…
HPA	vagina	HPA:0620000	6.52531e-06	17.2255	5.1854	5716	674	273	18911	TSPAN15,KIAA1522,TUFT1,BAIAP2L1,HSPA1A,HSPA1B,WWC1,PPL,DDR1,CLDN4,FAM241B,BAIAP2,PIP4K2C,FAM83H,PKP3,PLEKHG3,PDGFB,RASEF,PRXL2A,CCNJL,ELF3,MYO5B,SDC4,ARHGEF16,EPB41L1,GRB7,F11R,PATJ,TNFRSF21,KRT15,TSKU,MYH14,CYB561,TSPAN6,ANKEF1,TFAP2C,ITGB4,KIAA1671,SCNN1A,MAP7,ETNK2,KLC3,VAPB,MET,SOWAHC,PCDH1,LYPD3,CGN,ESRP1,AGRN,EFNA5,SFN,CEP170B,TACSTD2,CDH1,LAMB3,S100A2,DSG2,CLDN1,CTTN,RCE1,SDC1,SLC25A13,CAR…
TF	Factor: AP-2rep; motif: NGGGGCGGGGC; match class: 1	TF:M09967_1	6.67378e-06	17.1931	5.17563	1342	2556	268	18911	CELSR1,RHPN2,BAIAP2,PIP4K2C,FAM83H,IGSF3,BCAM,EEF1A2,ARHGEF16,MYH14,CDS1,LLGL2,IQANK1,KLC3,CGN,MAP3K9,AGRN,CEP170B,BCAP31,RCE1,JAG2,CLMN,TJP1,CMTM4,SHB,SLC2A4RG,PPP1R26,RAP1GAP,PLEKHG6,INHBB,MPP3,PKP2,MARVELD2,G6PD,TBC1D8,SPIRE2,TMEM40,NUDT14,SEZ6L2,TC2N,HID1,CTSD,COBL,PFKFB2,EPPK1,MRGBP,HMGB3,TSEN34,LTBP3,FGF12,MICALL2,PXN,GRTP1,ARHGAP8,NAXE,GNG4,SPINT2,ARHGAP29,AGAP1,LFNG,CCDC85C,CDC42BPB,ESPN,…
GO:BP	hemidesmosome assembly	GO:0031581	7.05312e-06	17.1133	5.15162	12	2566	11	18911	ITGB4,LAMB3,LAMC2,LAMA3,PLEC,DST,COL17A1,KRT5,CD151,ITGA6,LAMC1
TF	Factor: TFAP2A; motif: YGCCCNNRGGCN; match class: 1	TF:M04146_1	7.07908e-06	17.108	5.15002	3646	2772	683	18911	KIAA1522,CTSV,LAMA5,SHTN1,KRT80,HSPA1A,PPL,BAIAP2,P2RY2,PLEKHG3,PDGFB,MYO5B,EEF1A2,EPB41L1,WNT7B,ARHGAP39,CYB561,PIGT,LAPTM4B,TFAP2C,SLC39A1,ITGB4,LLGL2,MAP7,ETNK2,KLC3,SOWAHC,C19ORF33,ACOT4,KIAA0895,HES1,TMEM54,S100A2,DSG2,TRIM47,BCAP31,PRSS22,SDC1,SYT12,FNBP1L,CARD10,C1ORF56,JAG2,TACC2,CLMN,PTPN3,SSH3,LSR,TJP1,CMTM4,GRAMD2A,SHB,HM13,STAU1,GRHL1,KRT4,PLEKHG6,MAB21L4,INHBB,MUC1,PKP2,VMP1,KLF5,CIT…
HPA	placenta; trophoblastic cells[‚â•Low]	HPA:0380521	7.25537e-06	17.0725	5.13934	6584	2010	823	18911	TSPAN15,KIAA1522,KRT8,TUFT1,KRT18,BAIAP2L1,HSPA1A,HSPA1B,WWC1,DDR1,CLDN4,FAM241B,BAIAP2,TLCD1,PIP4K2C,FAM83H,IGSF3,CHMP4C,PLEKHG3,PDGFB,RASEF,PRXL2A,CCNJL,ELF3,MYO5B,SDC4,ARHGEF16,EPB41L1,GRB7,F11R,PATJ,TNFRSF21,TSKU,TSPAN6,ANKEF1,TFAP2C,ITGB4,CDS1,KIAA1671,SCNN1A,MAP7,ETNK2,KLC3,VAPB,MET,SOWAHC,PCDH1,CGN,MAP3K9,ITGB6,ESRP1,KRT7,AGRN,EFNA5,CPVL,CDH1,LAMB3,DSG2,EPN3,CLDN1,CTTN,BCAP31,RCE1,SDC1,FNB…
GO:BP	cellular component organization	GO:0016043	7.39876e-06	17.0443	5.13084	6267	710	321	18911	CTSV,LAMA5,KRT8,CELSR1,SHTN1,KRT18,BAIAP2L1,EFNA1,HSPA1A,HSPA1B,PPL,MAP3K13,DDR1,CLDN4,BAIAP2,TOM1L1,TLCD1,PIP4K2C,FAM83H,PKP3,CHMP4C,RAB5IF,PDGFB,ELF3,MYO5B,SDC4,EPB41L1,PAK4,GRB7,F11R,PTPRF,PATJ,TNFRSF21,WNT7B,KRT15,TSKU,AIF1L,MYH14,ARHGAP39,LAPTM4B,ITGB4,CDS1,LLGL2,FOXA1,MAP7,VWA1,VAPB,MET,ITGB6,PMEPA1,ACOT4,AGRN,EFNA5,SFN,PERP,HES1,TACSTD2,CDH1,TMEM30B,LAMB3,DSG2,CLDN9,CLDN1,CTTN,BCAP31,SDC1,…
GO:MF	protein binding	GO:0005515	7.79246e-06	16.9695	5.10833	14289	916	780	18911	TSPAN15,CTSV,LAMA5,KRT8,TUFT1,SHTN1,RIPK4,KRT80,KRT18,BAIAP2L1,EFNA1,RHPN2,SOX13,HSPA1A,MLF1,HSPA1B,DDX27,WWC1,PPL,MAP3K13,DDR1,CLDN4,FAM241B,BAIAP2,ADGRG1,MAL2,TOM1L1,TLCD1,PLPP2,PIP4K2C,FAM83H,P2RY2,BCAM,PKP3,CHMP4C,RAB5IF,PDGFB,RASEF,CCNJL,ELF3,MYO5B,EEF1A2,EPCAM,SDC4,ARHGEF16,NHLRC1,EPB41L1,PAK4,GRB7,F11R,WFDC2,PTPRF,PATJ,TNFRSF21,WNT7B,KRT15,TSKU,AIF1L,MYH14,ARHGAP39,CYB561,TSPAN6,PIGT,LAPTM…
TF	Factor: EGR1; motif: NGNGKGGGYGGNGS; match class: 1	TF:M09761_1	8.04356e-06	16.9237	5.09455	1518	2842	325	18911	BAIAP2L1,BAIAP2,PLPP2,P2RY2,EEF1A2,GRB7,PATJ,CYB561,ANKEF1,ETNK2,AGRN,CEP170B,FNBP1L,CARD10,JAG2,OVOL2,ATP1B1,CLMN,PTPN3,CDC42BPG,TJP1,GRHL1,RAP1GAP,REPS2,INHBB,MUC1,PKP2,G6PD,UPP1,NANOS1,NCKAP1,CACNG4,PANX2,ABHD11,TMEM40,PLEKHA7,MCOLN3,POR,PPFIA1,RYK,HID1,IL13RA1,MRGBP,PLEKHA6,LTBP3,PARD3,SERTAD4,LRRC1,TNKS1BP1,GRTP1,HOOK1,ARHGAP8,ARPC1A,GNG4,OSBPL2,STX3,MAP3K21,PLEKHA5,ADAM15,CCDC85C,RHOD,CDC42…
GO:CC	basement membrane	GO:0005604	8.25522e-06	16.8863	5.08327	103	3199	45	18911	LAMA5,VWA1,AGRN,EFNA5,LAMB3,LAMC2,LAD1,LAMA3,LAMB1,DST,DAG1,ATRN,ANXA2,COL4A6,NTN4,ACHE,COL28A1,NPNT,CST3,COL4A5,COL17A1,ENTPD2,FREM2,NTN1,CD151,P3H2,SMOC1,LAMB2,FBLN1,MMRN2,MATN2,ITGA6,COL18A1,FRAS1,TGFBI,COL4A4,VWA2,LAMC1,APLP1,DLG1,LAMC3,CASK,COL7A1,EGFL6,HSPG2
TF	Factor: SP4; motif: SCCCCGCCCCS; match class: 1	TF:M01273_1	8.6041e-06	16.8265	5.06529	984	2817	225	18911	CELSR1,BAIAP2,PIP4K2C,FAM83H,BCAM,EEF1A2,ARHGEF16,LLGL2,IQANK1,CGN,MAP3K9,AGRN,CEP170B,BCAP31,RCE1,JAG2,CLMN,TJP1,SHB,SLC2A4RG,PPP1R26,RAP1GAP,INHBB,MPP3,MARVELD2,G6PD,TBC1D8,SPIRE2,TMEM40,NUDT14,HID1,CTSD,COBL,PFKFB2,EPPK1,MRGBP,HMGB3,TSEN34,LTBP3,FGF12,MICALL2,PXN,GRTP1,NAXE,GNG4,SPINT2,ARHGAP29,AGAP1,LFNG,CDC42BPB,ESPN,CAMSAP3,RNF114,NECTIN2,SIK1B,TEAD3,CADM4,CD276,GPRC5B,TNFRSF12A,TEAD4,MYZAP…
REAC	Laminin interactions	REAC:R-HSA-3000157	8.8443e-06	16.7868	5.05334	30	3199	19	18911	LAMA5,ITGB4,LAMB3,LAMC2,ITGA3,LAMA3,LAMB1,ITGA2,COL4A6,COL4A5,ITGAV,LAMB2,ITGA6,COL18A1,COL4A4,LAMC1,LAMC3,COL7A1,HSPG2
TF	Factor: PLAG1; motif: CCCCCKWNNNGGSCCC	TF:M01973	8.87433e-06	16.7819	5.05186	5917	2284	879	18911	TSPAN15,KIAA1522,CELSR1,RIPK4,TMEM184A,BAIAP2L1,RHPN2,HSPA1A,WWC1,PPL,DDR1,BAIAP2,FAM83H,IGSF3,P2RY2,BCAM,PKP3,PLEKHG3,PDGFB,PRXL2A,ELF3,EEF1A2,SDC4,ARHGEF16,EPB41L1,PAK4,GRB7,PTPRF,WNT7B,KRT15,MYH14,CYB561,LAPTM4B,SLC39A1,LLGL2,FOXA1,B3GNT5,SCNN1A,VWA1,ETNK2,IQANK1,VAPB,MET,SOWAHC,PCDH1,C19ORF33,MAP3K9,ESRP2,KRT7,AGRN,EFNA5,SFN,TACSTD2,TMEM30B,TMEM54,S100A2,TRIM47,BCAP31,SDC1,SYT12,FNBP1L,SLC25A…
KEGG	Arrhythmogenic right ventricular cardiomyopathy	KEGG:05412	9.21137e-06	16.7282	5.03568	77	250	10	18911	ITGB4,ITGB6,DSG2,DSC2,PKP2,LMNA,DSP,JUP,CACNG4,ITGA3
TF	Factor: ZNF692; motif: SYNGGSCCCASCCNC	TF:M09734	9.23847e-06	16.7239	5.0344	11139	1479	1025	18911	TSPAN15,KIAA1522,CTSV,LAMA5,KRT8,CELSR1,SHTN1,RIPK4,KRT80,KRT18,BAIAP2L1,RHPN2,SOX13,HSPA1A,MLF1,WWC1,PPL,MAP3K13,DDR1,CLDN4,FAM241B,BAIAP2,ADGRG1,MAL2,TLCD1,PLPP2,PIP4K2C,FAM83H,IGSF3,P2RY2,BCAM,PKP3,PDGFB,PRXL2A,CCNJL,MYO5B,EEF1A2,EPCAM,ARHGEF16,NHLRC1,EPB41L1,GRB7,WFDC2,PTPRF,PATJ,WNT7B,KRT15,AIF1L,MYH14,ARHGAP39,CYB561,TSPAN6,ANKEF1,SLC39A1,ITGB4,CDS1,LLGL2,FOXA1,KIAA1671,B3GNT5,SCNN1A,MAP7,V…
TF	Factor: SP4; motif: NWRGCCACGCCCMCTYN	TF:M03922	9.26134e-06	16.7203	5.03333	5830	2841	1054	18911	TSPAN15,KIAA1522,LAMA5,KRT8,CELSR1,TUFT1,RIPK4,KRT18,BAIAP2L1,EFNA1,WWC1,PPL,BAIAP2,MAL2,TOM1L1,TLCD1,PLPP2,PIP4K2C,FAM83H,IGSF3,P2RY2,BCAM,PKP3,MYO5B,EEF1A2,ARHGEF16,PAK4,GRB7,F11R,WFDC2,PTPRF,MYH14,CYB561,PIGT,LAPTM4B,ITGB4,CDS1,LLGL2,B3GNT5,VWA1,PON3,IQANK1,KLC3,VAPB,TSPAN13,MET,SOWAHC,C19ORF33,CGN,MAP3K9,PMEPA1,ACOT4,KRT7,AGRN,SFN,KIAA0895,PERP,CEP170B,DSG2,TRIM47,CTTN,BCAP31,PRSS22,FNBP1L,WN…
GO:MF	laminin binding	GO:0043236	9.29522e-06	16.7151	5.03174	28	1102	12	18911	BCAM,LYPD3,AGRN,ITGA3,ADGRG6,DAG1,ITGA2,TINAGL1,LYPD5,NTN4,LGALS3,ACHE
TF	Factor: TFAP2C; motif: NGCCCNNRGGCA	TF:M04152	9.86046e-06	16.6299	5.0061	7388	2418	1132	18911	KIAA1522,CTSV,LAMA5,CELSR1,SHTN1,RIPK4,KRT80,EFNA1,RHPN2,SOX13,HSPA1A,PPL,CLDN4,BAIAP2,TLCD1,FAM83H,P2RY2,BCAM,PLEKHG3,PDGFB,RASEF,SPR,ELF3,MYO5B,EEF1A2,SDC4,EPB41L1,F11R,WFDC2,WNT7B,KRT15,MYH14,ARHGAP39,CYB561,PIGT,LAPTM4B,TFAP2C,SLC39A1,ITGB4,LLGL2,FOXA1,KIAA1671,MAP7,ETNK2,IQANK1,KLC3,SOWAHC,PCDH1,C19ORF33,LYPD3,MAP3K9,STARD10,ACOT4,KRT7,AGRN,EFNA5,KIAA0895,ST6GALNAC2,TMEM132A,CEP170B,HES1,TME…
GO:BP	appendage development	GO:0048736	1.01228e-05	16.592	4.9947	184	4969	85	18911	SLC39A1,ITGB4,WNT9A,TFAP2A,GRHL2,KDF1,IRF6,LRP5,IQCE,ASPH,PBX1,HOXC13,CRABP2,FGFR2,NR2F2,TGFB2,FZD6,CYP26B1,HOXC10,WNT3,B9D1,FREM2,PLXNA2,HOXC11,SALL4,ECE1,SMOC1,SOX9,DKK1,ITGA6,SEMA3C,BMP7,WNT7A,KREMEN1,GJA5,BMPR1B,FRAS1,HOXD10,SCX,FMN1,NIPBL,RARG,RSPO4,EXT1,DLX6,ZNRF3,PITX1,PSEN1,MSX2,ZNF219,SP8,C2CD3,LRP6,IFT172,BCL2L11,ZNF358,TP63,PAM,SHH,HOXD13,ALX1,ALDH1A2,GPC3,GNAS,MKS1,DYNC2H1,IFT52,FGF4,…
GO:BP	limb development	GO:0060173	1.01228e-05	16.592	4.9947	184	4969	85	18911	SLC39A1,ITGB4,WNT9A,TFAP2A,GRHL2,KDF1,IRF6,LRP5,IQCE,ASPH,PBX1,HOXC13,CRABP2,FGFR2,NR2F2,TGFB2,FZD6,CYP26B1,HOXC10,WNT3,B9D1,FREM2,PLXNA2,HOXC11,SALL4,ECE1,SMOC1,SOX9,DKK1,ITGA6,SEMA3C,BMP7,WNT7A,KREMEN1,GJA5,BMPR1B,FRAS1,HOXD10,SCX,FMN1,NIPBL,RARG,RSPO4,EXT1,DLX6,ZNRF3,PITX1,PSEN1,MSX2,ZNF219,SP8,C2CD3,LRP6,IFT172,BCL2L11,ZNF358,TP63,PAM,SHH,HOXD13,ALX1,ALDH1A2,GPC3,GNAS,MKS1,DYNC2H1,IFT52,FGF4,…
WP	Arrhythmogenic Right Ventricular Cardiomyopathy	WP:WP2118	1.04197e-05	16.5503	4.98214	74	250	10	18911	ITGB4,ITGB6,DSG2,DSC2,PKP2,LMNA,DSP,JUP,CACNG4,ITGA3
GO:BP	cell-substrate junction organization	GO:0150115	1.08036e-05	16.4981	4.96643	107	584	18	18911	SDC4,ITGB4,EFNA5,LAMB3,CTTN,LAMC2,LAMA3,PLEC,LIMCH1,PTPRK,DUSP3,RHOD,RAC1,DST,CAMSAP3,PHLDB2,S100A10,ITGA2
HP	Thickened skin	HP:0001072	1.11475e-05	16.4529	4.95282	398	4425	145	18911	PDGFB,ITGB4,ITGB6,PERP,LAMB3,DSG2,CLDN1,DSC2,LAMC2,CDH3,GRHL2,LMNA,DSP,JUP,KDF1,LAMA3,NECTIN4,LTBP3,PLEC,ALDH3A2,CARD14,NSDHL,POFUT1,SULT2B1,GJB3,PSEN2,RYR1,ST14,KRT86,KRT17,RIN2,BAG3,KRT6A,FGFR2,FITM2,IL17RC,IL36RN,PPARG,FERMT1,SLCO2A1,PSENEN,KRT83,PEX13,KRT81,KRT16,CAST,NEBL,EXPH5,SPINK5,COL4A5,COL17A1,FGFR3,KRT13,KRT5,DOLK,GJB2,SEMA3A,BSCL2,CAP2,NECTIN1,PKP1,WNT10A,ZMPSTE24,NSMCE2,ANOS1,CAV1,A…
HPA	duodenum; glandular cells[‚â•Medium]	HPA:0150052	1.18207e-05	16.3683	4.92736	6314	2010	791	18911	TSPAN15,KIAA1522,KRT8,TUFT1,KRT18,BAIAP2L1,HSPA1A,WWC1,DDR1,CLDN4,BAIAP2,TLCD1,PIP4K2C,FAM83H,CHMP4C,PLEKHG3,PDGFB,RASEF,PRXL2A,CCNJL,ELF3,MYO5B,EPCAM,SDC4,ARHGEF16,GRB7,F11R,PATJ,TNFRSF21,TSKU,MYH14,CYB561,ANKEF1,ITGB4,CDS1,KIAA1671,SCNN1A,MAP7,VAPB,MET,SOWAHC,PCDH1,CGN,MAP3K9,ITGB6,ESRP1,EFNA5,CEP170B,CDH1,LAMB3,DSG2,EPN3,CTTN,BCAP31,RCE1,SDC1,FNBP1L,SLC25A13,CARD10,JAG2,TACC2,ATP1B1,ABCC3,CLMN…
KEGG	Axon guidance	KEGG:04360	1.19735e-05	16.3498	4.92178	181	2515	51	18911	EFNA1,PAK4,MET,EFNA5,SSH3,SEMA4B,PARD6B,RYK,SEMA3E,PARD3,EPHA2,L1CAM,RHOD,RAC1,PRKCZ,PAK6,PTK2,PLXNA1,PIK3CB,WNT4,EPHA1,NTN4,EFNB2,EPHB4,EPHB2,SRC,SEMA6B,SEMA4C,ENAH,PLXNB3,PLXNA2,ABLIM1,NTN1,SEMA3A,RAC3,PLXNB1,ABLIM3,NGEF,EPHB3,SEMA3C,BMP7,SEMA3B,BMPR1B,EPHA4,NRP1,RND1,GNAI1,SRGAP1,SRGAP3,SEMA3F,UNC5A
TF	Factor: ZBP99; motif: GCCCMTCCCCCR	TF:M12057	1.22253e-05	16.3198	4.91274	5025	720	275	18911	KIAA1522,LAMA5,KRT80,BAIAP2L1,EFNA1,RHPN2,SOX13,HSPA1A,MLF1,CLDN4,BAIAP2,ADGRG1,TOM1L1,TLCD1,PLPP2,PIP4K2C,FAM83H,IGSF3,PKP3,PLEKHG3,EEF1A2,EPCAM,ARHGEF16,PAK4,GRB7,F11R,TNFRSF21,AIF1L,CYB561,SLC39A1,CDS1,LLGL2,FOXA1,KIAA1671,B3GNT5,SCNN1A,IQANK1,PCDH1,CGN,ESRP2,ESRP1,KRT7,AGRN,YIPF6,HES1,CDH1,AP1M2,LAMB3,S100A2,DSG2,CTTN,BCAP31,SDC1,FNBP1L,WNT9A,OVOL2,CLMN,GPRC5C,TSPAN1,TJP1,MOCS3,ZNF205,DSC2,HM…
TF	Factor: ZBP89; motif: CCCCKCCCCCNN; match class: 1	TF:M07397_1	1.27666e-05	16.2573	4.89392	2844	2812	553	18911	KRT8,CELSR1,KRT18,BAIAP2L1,PPL,BAIAP2,TLCD1,PLPP2,PIP4K2C,FAM83H,IGSF3,BCAM,PKP3,EEF1A2,ARHGEF16,PAK4,GRB7,PATJ,MYH14,ANKEF1,CDS1,FOXA1,ETNK2,IQANK1,SOWAHC,PCDH1,ESRP1,KRT7,AGRN,CEP170B,HES1,CTTN,SDC1,FNBP1L,WNT9A,JAG2,CDC42BPG,PRPF6,TJP1,SHB,STAU1,SLC2A4RG,GRHL1,RAP1GAP,REPS2,INHBB,MUC1,PKP2,G6PD,TBC1D8,CTNND1,SPIRE2,DSP,CUEDC1,KDF1,CACNG4,PANX2,GIPC1,TMEM40,NUDT14,PLEKHA7,SEZ6L2,PCSK1N,PPFIA1,H…
HPA	stomach 2; glandular cells[‚â•Medium]	HPA:0550052	1.29006e-05	16.2422	4.88939	5961	2010	752	18911	TSPAN15,KIAA1522,KRT8,TUFT1,KRT18,BAIAP2L1,HSPA1A,HSPA1B,WWC1,DDR1,CLDN4,FAM241B,BAIAP2,TLCD1,PIP4K2C,FAM83H,CHMP4C,PLEKHG3,PDGFB,RASEF,CCNJL,ELF3,MYO5B,SDC4,ARHGEF16,EPB41L1,GRB7,PATJ,TNFRSF21,MYH14,TSPAN6,ANKEF1,ITGB4,CDS1,FOXA1,KIAA1671,SCNN1A,MAP7,VAPB,MET,SOWAHC,PCDH1,CGN,MAP3K9,ESRP1,EFNA5,CDH1,LAMB3,DSG2,EPN3,CTTN,BCAP31,RCE1,SDC1,FNBP1L,SLC25A13,CARD10,JAG2,TACC2,STYK1,ABCC3,CLMN,PTPN3,SS…
GO:BP	keratinization	GO:0031424	1.31606e-05	16.2134	4.88072	136	244	17	18911	KRT8,KRT80,KRT18,PPL,PKP3,KRT15,KRT7,SFN,PERP,DSG2,DSC2,KRT4,PKP2,CDH3,KRT19,DSP,JUP
GO:CC	zonula adherens	GO:0005915	1.33098e-05	16.1971	4.87583	9	492	7	18911	KIFC3,CTNND1,JUP,PLEKHA7,CTNNA1,CAMSAP3,NECTIN2
REAC	Signaling by Receptor Tyrosine Kinases	REAC:R-HSA-9006934	1.45695e-05	16.0667	4.83656	486	737	46	18911	LAMA5,BAIAP2,PDGFB,GRB7,MET,ESRP2,ESRP1,LAMB3,PTPN3,TGFA,SHB,LAMC2,CTNND1,ID1,NCKAP1,SPINT1,JUP,ITGA3,LAMA3,BCAR1,EGFR,PTK6,PXN,PTPRK,SPINT2,DUSP3,LAMB1,GALNT3,RAC1,BTC,TNS3,CTNNA1,PRKCZ,YES1,ITGA2,ITCH,PTPN12,ERBB2,NTF4,PTPRU,DUSP4,PSEN2,ATP6V1B1,MST1R,ATP6AP1,AREG
WP	NRF2 pathway	WP:WP2884	1.46787e-05	16.0559	4.83331	136	1442	31	18911	HSPA1A,PDGFB,SLC39A1,ABCC3,TGFA,G6PD,SLC6A11,EPHA2,SLC2A1,SRXN1,NQO1,ME1,SQSTM1,PTGR1,SERPINA1,SLC2A8,TGFB2,RXRA,GCLC,SLC6A8,FTH1,ALDH3A1,GSTM3,GPX2,SLC5A12,CBR1,ABCC2,SLC2A12,SLC6A14,GPX3,DNAJB1
HP	Plantar hyperkeratosis	HP:0007556	1.47257e-05	16.0513	4.83192	46	3792	27	18911	ITGB4,LAMB3,LAMC2,DSP,LAMA3,PLEC,KRT17,KRT6A,FERMT1,KRT83,KRT16,COL17A1,KRT5,GJB2,NECTIN1,PKP1,WNT10A,RHBDF2,GJB6,SLURP1,HPGD,AAGAB,KRT9,COL7A1,KRT10,TGM1,CTSC
HPA	appendix; glandular cells[‚â•Medium]	HPA:0030052	1.58094e-05	15.9489	4.80108	5604	588	237	18911	TSPAN15,KIAA1522,KRT8,TUFT1,KRT18,BAIAP2L1,HSPA1A,WWC1,DDR1,CLDN4,BAIAP2,TLCD1,PIP4K2C,FAM83H,CHMP4C,PLEKHG3,PDGFB,RASEF,PRXL2A,ELF3,MYO5B,EPCAM,SDC4,ARHGEF16,EPB41L1,GRB7,F11R,PATJ,TNFRSF21,TSKU,MYH14,CYB561,TSPAN6,ANKEF1,KIAA1671,SCNN1A,MAP7,VAPB,MET,SOWAHC,PCDH1,CGN,MAP3K9,ITGB6,ESRP1,ACOT4,EFNA5,CEP170B,CDH1,LAMB3,DSG2,EPN3,CTTN,BCAP31,RCE1,SDC1,SLC25A13,CARD10,TACC2,STYK1,ATP1B1,ABCC3,CLMN,P…
TF	Factor: ZNF511; motif: GGRRGRGGCWGNG; match class: 1	TF:M09738_1	1.58842e-05	15.942	4.79903	4534	476	180	18911	KIAA1522,LAMA5,CELSR1,TMEM184A,KRT80,BAIAP2L1,EFNA1,SOX13,HSPA1A,DDX27,WWC1,PPL,DDR1,CLDN4,FAM241B,BAIAP2,PLPP2,BCAM,PDGFB,PRXL2A,EEF1A2,EPCAM,ARHGEF16,NHLRC1,GRB7,PTPRF,PATJ,TNFRSF21,WNT7B,AIF1L,MYH14,ARHGAP39,ANKEF1,ITGB4,CDS1,FOXA1,KIAA1671,SCNN1A,C19ORF33,MAP3K9,STARD10,AGRN,EFNA5,YIPF6,ST6GALNAC2,TMEM132A,CEP170B,TMEM30B,TMEM54,DSG2,CTTN,BCAP31,RTL8A,SYT12,CARD10,WNT9A,JAG2,SLPI,STYK1,ATP1B1…
GO:BP	regulation of actin cytoskeleton organization	GO:0032956	1.59703e-05	15.9342	4.79669	354	561	34	18911	CELSR1,BAIAP2L1,BAIAP2,SDC4,F11R,MET,EFNA5,TACSTD2,CTTN,SSH3,TJP1,WASL,SPIRE2,ID1,NCKAP1,SPTBN2,PPFIA1,SEMA3E,LIMCH1,PXN,ARPC1A,ARHGEF5,F2RL1,CDC42EP4,RHOD,SMIM22,SVIL,RAC1,CARMIL1,RHOBTB3,PHLDB2,ECT2,S100A10,DSTN
TF	Factor: CKROX; motif: SCCCTCCCC	TF:M01175	1.64298e-05	15.8933	4.78437	6976	1275	597	18911	KIAA1522,CTSV,LAMA5,KRT80,BAIAP2L1,EFNA1,RHPN2,DDX27,WWC1,CLDN4,BAIAP2,MAL2,TOM1L1,TLCD1,PLPP2,PIP4K2C,FAM83H,IGSF3,P2RY2,PKP3,PDGFB,PRXL2A,CCNJL,ELF3,MYO5B,EEF1A2,EPCAM,ARHGEF16,EPB41L1,GRB7,F11R,PTPRF,PATJ,WNT7B,AIF1L,CYB561,TSPAN6,LAPTM4B,SLC39A1,ITGB4,LLGL2,FOXA1,KIAA1671,SCNN1A,MAP7,VWA1,ETNK2,IQANK1,PCDH1,CGN,MAP3K9,ESRP2,ESRP1,KRT7,AGRN,EFNA5,TMEM132A,HES1,TACSTD2,CDH1,AP1M2,LAMB3,S100A2,D…
HP	Scarring alopecia of scalp	HP:0004552	1.66184e-05	15.8769	4.77941	11	327	6	18911	ITGB4,LAMB3,CLDN1,LAMC2,LAMA3,PLEC
GO:CC	extracellular space	GO:0005615	1.83001e-05	15.7378	4.73755	3102	608	178	18911	CTSV,LAMA5,KRT8,KRT18,BAIAP2L1,HSPA1A,HSPA1B,PPL,DDR1,BAIAP2,ADGRG1,MAL2,TOM1L1,PIP4K2C,BCAM,PDGFB,SPR,MYO5B,EPCAM,SDC4,F11R,WFDC2,PTPRF,PATJ,WNT7B,KRT15,TSKU,AIF1L,MYH14,TSPAN6,ITGB4,SCNN1A,VWA1,PON3,LYPD3,KRT7,AGRN,SFN,CPVL,TMEM132A,TACSTD2,CDH1,DSG2,EPN3,PRSS22,SDC1,WNT9A,SLPI,ATP1B1,LSR,TMPRSS13,GPRC5C,TSPAN1,TGFA,DSC2,STAU1,CAPN2,PLS1,INHBB,WASL,MUC1,LAMC2,KIFC3,CXCL16,G6PD,MB,CTNND1,C11ORF5…
REAC	Rho GTPase cycle	REAC:R-HSA-194840	1.86625e-05	15.7095	4.72903	140	3249	51	18911	ARHGEF16,ARHGAP39,ARHGAP8,ARHGAP29,ARHGEF5,RHOV,RHOD,RAC1,ARHGEF35,ECT2,ARHGAP32,OPHN1,SYDE2,ARAP3,OCRL,ARHGEF37,ARHGEF26,ARHGEF10L,ARHGAP5,ARHGAP40,VAV2,ARHGAP42,RAC3,ARHGEF19,KALRN,PLEKHG5,MCF2L,NGEF,ARHGAP12,RHOB,CHN2,TRIO,NET1,ARHGEF17,SRGAP1,ARHGAP26,ITSN1,SRGAP3,FGD4,ARHGAP21,ARHGEF38,RHOC,ARHGEF12,TRIP10,ARHGEF3,ARHGEF4,DEPDC7,ARHGEF33,FAM13A,ARHGEF39,ARHGEF11
TF	Factor: ZEB1; motif: CAGGTGN	TF:M04831	1.90447e-05	15.6803	4.72023	7731	476	273	18911	TSPAN15,KIAA1522,TUFT1,SHTN1,RIPK4,TMEM184A,EFNA1,RHPN2,SOX13,HSPA1A,HSPA1B,WWC1,PPL,MAP3K13,DDR1,FAM241B,ADGRG1,MAL2,TOM1L1,TLCD1,PLPP2,PIP4K2C,FAM83H,BCAM,CHMP4C,ELF3,MYO5B,EEF1A2,EPCAM,ARHGEF16,NHLRC1,PAK4,GRB7,F11R,WFDC2,PATJ,TNFRSF21,KRT15,TSKU,CYB561,PIGT,ANKEF1,TFAP2C,SLC39A1,CDS1,LLGL2,FOXA1,KIAA1671,SCNN1A,MAP7,VWA1,ETNK2,IQANK1,KLC3,TSPAN13,MET,SOWAHC,PCDH1,C19ORF33,PMEPA1,ESRP2,ESRP1,S…
HPA	lung	HPA:0300000	1.90893e-05	15.6769	4.71921	6986	706	333	18911	TSPAN15,KIAA1522,KRT8,TUFT1,KRT18,BAIAP2L1,HSPA1A,HSPA1B,WWC1,PPL,DDR1,CLDN4,BAIAP2,TLCD1,PIP4K2C,PKP3,CHMP4C,PLEKHG3,PDGFB,RASEF,PRXL2A,CCNJL,MYO5B,SDC4,ARHGEF16,EPB41L1,GRB7,F11R,PATJ,TNFRSF21,TSKU,AIF1L,MYH14,CYB561,TSPAN6,ANKEF1,ITGB4,CDS1,KIAA1671,SCNN1A,MAP7,ETNK2,VAPB,MET,SOWAHC,PCDH1,CGN,MAP3K9,ITGB6,ESRP1,THRB,ACOT4,KRT7,AGRN,EFNA5,SFN,CPVL,CDH1,LAMB3,DSG2,CTTN,BCAP31,RCE1,FNBP1L,SLC25A1…
TF	Factor: MAZ; motif: NKGGGAGGGGRGGR	TF:M02023	1.92284e-05	15.6664	4.71606	6863	3551	1502	18911	KIAA1522,LAMA5,CELSR1,SHTN1,TMEM184A,KRT80,BAIAP2L1,EFNA1,RHPN2,HSPA1A,HSPA1B,CLDN4,BAIAP2,TLCD1,PLPP2,PIP4K2C,P2RY2,BCAM,PLEKHG3,PDGFB,SPR,MYO5B,EEF1A2,EPCAM,SDC4,ARHGEF16,NHLRC1,EPB41L1,PAK4,GRB7,F11R,WFDC2,PTPRF,PATJ,AIF1L,MYH14,TSPAN6,LAPTM4B,ANKEF1,SLC39A1,CDS1,LLGL2,FOXA1,B3GNT5,MAP7,VWA1,TSPAN13,PCDH1,C19ORF33,CGN,MAP3K9,ESRP1,KRT7,AGRN,SFN,ST6GALNAC2,TMEM132A,CEP170B,HES1,TACSTD2,TMEM54,L…
HPA	liver; bile duct cells[‚â•Low]	HPA:0290391	2.01734e-05	15.5972	4.69522	3779	697	199	18911	TSPAN15,KIAA1522,KRT8,TUFT1,KRT18,BAIAP2L1,HSPA1A,HSPA1B,WWC1,PPL,BAIAP2,TLCD1,FAM83H,CHMP4C,PDGFB,PRXL2A,MYO5B,SDC4,ARHGEF16,EPB41L1,GRB7,F11R,PATJ,TNFRSF21,TSKU,MYH14,TSPAN6,KIAA1671,SCNN1A,MAP7,VAPB,MET,SOWAHC,PCDH1,KRT7,AGRN,EFNA5,CDH1,LAMB3,DSG2,CLDN1,CTTN,BCAP31,RCE1,FNBP1L,CARD10,JAG2,TACC2,CLMN,SSH3,LSR,TJP1,CMTM4,MIPOL1,STON2,STAU1,CAPN2,WASL,CLDN7,VMP1,DPM1,G6PD,CTNND1,KRT19,PIR,ID1,NAN…
GO:CC	membrane	GO:0016020	2.127e-05	15.5208	4.67223	9149	1108	674	18911	TSPAN15,CTSV,KRT8,CELSR1,RIPK4,TMEM184A,KRT18,BAIAP2L1,EFNA1,HSPA1A,HSPA1B,WWC1,PPL,MAP3K13,DDR1,CLDN4,FAM241B,BAIAP2,ADGRG1,MAL2,TOM1L1,TLCD1,PLPP2,PIP4K2C,IGSF3,P2RY2,BCAM,PKP3,CHMP4C,RAB5IF,PDGFB,MYO5B,EEF1A2,EPCAM,SDC4,EPB41L1,GRB7,F11R,PTPRF,PATJ,TNFRSF21,WNT7B,AIF1L,MYH14,CYB561,TSPAN6,PIGT,LAPTM4B,SLC39A1,ITGB4,CDS1,LLGL2,B3GNT5,SCNN1A,MAP7,VAPB,TSPAN13,MET,PCDH1,C19ORF33,LYPD3,CGN,ITGB6,P…
KEGG	Hippo signaling pathway	KEGG:04390	2.4151e-05	15.3376	4.61706	156	1202	29	18911	WWC1,PATJ,WNT7B,LLGL2,CDH1,WNT9A,ID1,DLG5,PARD6B,PARD3,CTNNA1,SCRIB,TEAD3,PRKCZ,TEAD4,WWTR1,TEAD1,AJUBA,AREG,PPP2R2C,WNT4,SOX2,TGFB2,STK3,FZD6,YAP1,WNT3,PRKCI,MPP5
HPA	seminal vesicle; glandular cells[‚â•Medium]	HPA:0430052	2.49196e-05	15.2924	4.60346	4949	706	250	18911	KIAA1522,KRT8,TUFT1,KRT18,HSPA1A,HSPA1B,WWC1,PPL,DDR1,CLDN4,BAIAP2,TLCD1,CHMP4C,PLEKHG3,PDGFB,RASEF,PRXL2A,MYO5B,EPCAM,SDC4,ARHGEF16,EPB41L1,GRB7,F11R,WFDC2,PATJ,TSKU,AIF1L,MYH14,CYB561,TSPAN6,ANKEF1,KIAA1671,SCNN1A,MAP7,VAPB,MET,SOWAHC,PCDH1,CGN,ESRP1,ACOT4,KRT7,AGRN,EFNA5,CPVL,TACSTD2,CDH1,EPN3,CLDN1,CTTN,BCAP31,RCE1,FNBP1L,SLC25A13,CARD10,JAG2,SLPI,TACC2,ZNF185,ABCC3,CLMN,SSH3,GPRC5C,PRPF6,TGF…
TF	Factor: ZBTB7C; motif: GKCCCGGGCKG	TF:M03806	2.49613e-05	15.2899	4.60273	2930	2088	435	18911	CTSV,RIPK4,TMEM184A,BAIAP2L1,SOX13,FAM241B,BAIAP2,MAL2,TLCD1,PLPP2,FAM83H,IGSF3,RAB5IF,PDGFB,MYO5B,SDC4,ARHGEF16,F11R,PTPRF,PATJ,TNFRSF21,CYB561,FOXA1,B3GNT5,VWA1,ETNK2,IQANK1,SOWAHC,PCDH1,MAP3K9,STARD10,AGRN,EFNA5,KIAA0895,CEP170B,CDH1,TMEM30B,TMEM54,AP1M2,BCAP31,RCE1,SLC25A13,CARD10,JAG2,ABCC3,PTPN3,TJP1,CMTM4,HM13,SLC2A4RG,RAP1GAP,EPHX1,INHBB,LAMC2,C4ORF19,TBC1D8,CDH3,SPIRE2,SLC22A5,DSP,PLK2,C…
TF	Factor: CTCF; motif: WGCGCCMYCTAGYGGYN	TF:M03895	2.56815e-05	15.2489	4.59038	8828	2492	1362	18911	KIAA1522,LAMA5,CELSR1,TMEM184A,BAIAP2L1,RHPN2,SOX13,HSPA1A,HSPA1B,WWC1,PPL,MAP3K13,FAM241B,TLCD1,PLPP2,FAM83H,P2RY2,BCAM,RAB5IF,PDGFB,RASEF,CCNJL,SPR,ELF3,MYO5B,SDC4,ARHGEF16,NHLRC1,GRB7,WFDC2,PTPRF,TNFRSF21,WNT7B,TSKU,MYH14,TSPAN6,LAPTM4B,TFAP2C,SLC39A1,CDS1,LLGL2,FOXA1,MAP7,ETNK2,IQANK1,VAPB,MET,SOWAHC,PCDH1,CGN,MAP3K9,PMEPA1,ESRP2,ESRP1,STARD10,ACOT4,AGRN,YIPF6,ST6GALNAC2,CPVL,TMEM132A,HES1,TM…
TF	Factor: EGR1; motif: NACGCCCACGCANW; match class: 1	TF:M03896_1	2.59824e-05	15.2321	4.58532	2051	2243	339	18911	CELSR1,BAIAP2,TOM1L1,TLCD1,FAM83H,IGSF3,EEF1A2,SDC4,PAK4,PTPRF,CYB561,ANKEF1,B3GNT5,VWA1,ETNK2,IQANK1,SOWAHC,AGRN,CEP170B,CDH1,TMEM54,JAG2,ATP1B1,CLMN,PTPN3,CDC42BPG,TJP1,SIX4,SLC2A4RG,GRHL1,RAP1GAP,REPS2,INHBB,WASL,PKP2,KLF5,DNAH14,G6PD,ID1,LAD1,SPINT1,BFSP1,PANX2,NUDT14,PLEKHA7,ERRFI1,MCOLN3,SLC6A11,C1ORF115,BCAR1,LRP5,RYK,IL13RA1,COBL,LTBP3,PARD3,SERTAD4,FAXC,LRRC1,MICALL2,HES4,GALE,C6ORF132,Z…
HPA	rectum; glandular cells[‚â•Medium]	HPA:0400052	2.63198e-05	15.2135	4.57972	6238	706	302	18911	TSPAN15,KIAA1522,KRT8,TUFT1,KRT18,BAIAP2L1,HSPA1A,WWC1,DDR1,CLDN4,BAIAP2,TLCD1,PIP4K2C,FAM83H,CHMP4C,PLEKHG3,PDGFB,RASEF,PRXL2A,CCNJL,ELF3,MYO5B,EPCAM,SDC4,ARHGEF16,EPB41L1,GRB7,F11R,PATJ,TNFRSF21,KRT15,TSKU,MYH14,CYB561,TSPAN6,ANKEF1,ITGB4,KIAA1671,SCNN1A,MAP7,VAPB,MET,SOWAHC,PCDH1,CGN,ITGB6,ESRP1,AGRN,EFNA5,CEP170B,CDH1,DSG2,EPN3,CTTN,BCAP31,RCE1,SDC1,FNBP1L,SLC25A13,CARD10,JAG2,TACC2,ATP1B1,AB…
GO:BP	enzyme linked receptor protein signaling pathway	GO:0007167	2.64495e-05	15.2064	4.57758	1064	915	97	18911	BAIAP2L1,EFNA1,HSPA1A,DDR1,BAIAP2,PDGFB,GRB7,F11R,PTPRF,MET,CGN,ITGB6,PMEPA1,ESRP2,ESRP1,EFNA5,HES1,OVOL2,STYK1,PTPN3,TGFA,SHB,REPS2,INHBB,WASL,CDH3,ID1,GPRC5A,GCNT2,NCKAP1,ITGA3,GIPC1,ERBB3,FRK,ERRFI1,BCAR1,EGFR,RYK,IL13RA1,LTBP3,PARD3,FGF12,PTK6,PXN,EPHA2,PTPRK,INHA,ARPC1A,DUSP3,AGR2,GALNT3,RAC1,BTC,TNK1,ITGB5,PRKCZ,YES1,CADM4,FOLR1,AFAP1L2,PDCD6,ARHGEF28,FAM83A,PTPN12,LMTK2,ERBB2,NTF4,CAV2,CNK…
HP	Right ventricular cardiomyopathy	HP:0011663	2.82193e-05	15.113	4.54945	8	244	5	18911	DSG2,DSC2,PKP2,DSP,JUP
HPA	tonsil; squamous epithelial cells[‚â•Medium]	HPA:0600222	2.94762e-05	15.0501	4.53053	4729	631	218	18911	KIAA1522,KRT8,TUFT1,BAIAP2L1,HSPA1A,HSPA1B,PPL,DDR1,CLDN4,BAIAP2,PIP4K2C,FAM83H,PKP3,PLEKHG3,PDGFB,PRXL2A,ELF3,MYO5B,SDC4,ARHGEF16,EPB41L1,GRB7,F11R,KRT15,MYH14,TSPAN6,ANKEF1,FOXA1,KIAA1671,SCNN1A,MAP7,VAPB,MET,SOWAHC,LYPD3,ITGB6,ESRP1,EFNA5,SFN,CEP170B,CDH1,LAMB3,S100A2,CLDN1,CTTN,BCAP31,RCE1,SDC1,FNBP1L,CARD10,JAG2,PTPN3,PRPF6,TGFA,MPZL2,MIPOL1,DSC2,HM13,STAU1,GRHL1,KRT4,CAPN2,TFAP2A,WASL,CLDN7…
TF	Factor: Egr-1; motif: CCGCCCMCG; match class: 1	TF:M04797_1	2.97309e-05	15.0377	4.52679	1528	3470	380	18911	KIAA1522,LAMA5,CELSR1,BAIAP2,MAL2,PDGFB,EEF1A2,PAK4,PTPRF,MYH14,CYB561,ANKEF1,LLGL2,ETNK2,KLC3,SOWAHC,CEP170B,BCAP31,SDC1,CARD10,WNT9A,ATP1B1,CLMN,SSH3,CDC42BPG,TJP1,SLC2A4RG,GRHL1,PPP1R26,RAP1GAP,REPS2,INHBB,PKP2,G6PD,ADRM1,SPIRE2,PANX2,NUDT14,PLEKHA7,PPFIA1,RYK,HID1,IL13RA1,MRGBP,LTBP3,SERTAD4,LIMCH1,DMRTA1,PC,LRRC1,PXN,GALE,TNKS1BP1,GRTP1,HOOK1,GNG4,OSBPL2,ATP9A,LFNG,PLEKHA5,ASPH,CCDC85C,CDC42…
GO:BP	regionalization	GO:0003002	2.99327e-05	15.0279	4.52385	350	4238	126	18911	CELSR1,ADGRG1,WNT7B,FOXA1,HES1,OVOL2,AURKA,LRP5,COBL,HES4,LFNG,PBX1,POFUT1,HOXC13,NTF4,LHX1,LMX1B,FGFR2,CELSR2,FOXC1,NR2F2,PCGF2,BHLHE41,CYP26B1,C3,SIX1,PCSK6,HOXC10,WNT3,HOXA3,EDN1,IRX2,MESP1,EPB41L5,PLXNA2,PPP2R3A,HOXC11,BHLHE40,TDRD5,SEMA3A,HOXB7,FZD5,MESP2,CYP26C1,MDFI,OTX1,WLS,HOXA2,DLL1,DKK1,SENP2,FOXJ1,ACVR2A,SEMA3C,SIX2,MAFB,WNT7A,LRP2,HOXD11,BMPR1B,HOXD10,CTNNBIP1,NRP1,GATA4,VANGL2,HEY1,…
TF	Factor: WT1; motif: NNGGGNGGGSGN	TF:M07436	3.06699e-05	14.9928	4.51329	5934	4270	1562	18911	KIAA1522,LAMA5,CELSR1,TUFT1,SHTN1,BAIAP2L1,EFNA1,RHPN2,SOX13,HSPA1A,WWC1,CLDN4,FAM241B,BAIAP2,TLCD1,PLPP2,FAM83H,P2RY2,BCAM,PKP3,PDGFB,CCNJL,EEF1A2,ARHGEF16,PAK4,GRB7,WFDC2,PTPRF,PATJ,MYH14,CYB561,ANKEF1,SLC39A1,LLGL2,FOXA1,KIAA1671,ETNK2,IQANK1,KLC3,TSPAN13,SOWAHC,PCDH1,MAP3K9,ESRP2,ESRP1,KRT7,AGRN,EFNA5,ST6GALNAC2,TMEM132A,CEP170B,HES1,TMEM54,AP1M2,DSG2,TRIM47,CTTN,RTL8A,SDC1,FNBP1L,SLC25A13,WN…
TF	Factor: TFII-I; motif: RGAGGKAGG	TF:M00706	3.09155e-05	14.9813	4.50982	5455	3062	1069	18911	KRT8,TUFT1,TMEM184A,KRT18,BAIAP2L1,MLF1,WWC1,BAIAP2,ADGRG1,MAL2,PLPP2,FAM83H,IGSF3,PKP3,CCNJL,ELF3,MYO5B,EEF1A2,F11R,WFDC2,PTPRF,PATJ,TNFRSF21,AIF1L,MYH14,CYB561,LLGL2,FOXA1,KIAA1671,SCNN1A,ETNK2,KLC3,TSPAN13,PCDH1,C19ORF33,PMEPA1,KRT7,AGRN,EFNA5,SFN,TMEM132A,CEP170B,TMEM30B,LAMB3,DSG2,CLDN9,CTTN,RTL8A,PRSS22,SLC25A13,CARD10,JAG2,ZNF185,ATP1B1,ABCC3,CLMN,LSR,GPRC5C,PRPF6,TGFA,TJP1,CMTM4,GRAMD2A,M…
WP	Hippo-Merlin Signaling Dysregulation	WP:WP4541	3.1958e-05	14.9335	4.49542	118	799	20	18911	PAK4,ITGB4,MET,ITGB6,CDH1,CDH3,ITGA3,EGFR,EPHA2,CTNNA1,ITGB5,TEAD3,TEAD4,ITGA2,TEAD1,AJUBA,PAK6,PTK2,ITGB8,FGFR2
REAC	NRAGE signals death through JNK	REAC:R-HSA-193648	3.2286e-05	14.9187	4.49099	59	3445	29	18911	ARHGEF16,ARHGEF5,RAC1,ARHGEF35,ECT2,ARHGEF37,ARHGEF26,ARHGEF10L,VAV2,ARHGEF19,KALRN,PLEKHG5,MCF2L,NGEF,BAD,TRIO,NET1,ARHGEF17,ITSN1,FGD4,ARHGEF38,ARHGEF12,ARHGEF3,ARHGEF4,NGFR,ARHGEF33,ARHGEF39,ARHGEF11,BCL2L11
GO:BP	protein localization to cell periphery	GO:1990778	3.24454e-05	14.9116	4.48885	343	1163	50	18911	TSPAN15,LAMA5,KRT18,PKP3,ARHGEF16,NHLRC1,F11R,MAP7,CDH1,ATP1B1,PLS1,PKP2,SYS1,JUP,CACNG4,ITGA3,MISP,EGFR,PPFIA1,EPHA2,STX3,EMP2,AGR2,SCRIB,ACSL3,PRKCZ,CRB3,S100A10,SQSTM1,DAG1,SLC9A3R2,RDX,ANK3,ATP2C2,KCNIP3,WDR72,AFDN,PDZD11,GRIP1,BCL2L1,LYPD1,EPHB2,RAB13,SLC9A3R1,LGALS3,RAB12,FCHO2,SMURF1,PRKCI,RAB15
TF	Factor: ZEB1; motif: CAGGTGN; match class: 1	TF:M04831_1	3.53446e-05	14.7881	4.45168	2059	1678	272	18911	TSPAN15,KIAA1522,TMEM184A,HSPA1A,HSPA1B,PPL,MAP3K13,FAM241B,ADGRG1,PIP4K2C,CHMP4C,ELF3,MYO5B,ARHGEF16,GRB7,PATJ,TNFRSF21,TFAP2C,LLGL2,KIAA1671,SCNN1A,MAP7,VWA1,SOWAHC,C19ORF33,ESRP2,SFN,CDH1,TMEM30B,AP1M2,EPN3,PRSS22,GET4,OVOL2,STYK1,EPHX1,PLS1,PLEKHG6,MAB21L4,MUC1,CLDN7,KIFC3,CXCL16,AURKA,C11ORF52,KRT19,GRHL2,LAD1,SPINT1,JUP,KDF1,PARD6B,GIPC1,GPR39,STX1A,SLC6A11,OCLN,LRP5,EPS8L1,FXYD3,CTSD,STAP2…
GO:MF	actin filament binding	GO:0051015	3.54807e-05	14.7826	4.45001	207	2386	55	18911	SHTN1,MYO5B,AIF1L,MYH14,CTTN,ZNF185,CLMN,PLS1,MISP,EGFR,MICALL2,ARPC1A,ANXA8,MYO6,SVIL,ESPN,CTNNA1,CAMSAP3,DSTN,MYO5C,PLS3,MARCKS,AJUBA,CORO2A,MYO10,AFDN,FERMT1,DMTN,PPP1R9A,GAS2L3,ACTN4,NEBL,IQGAP3,ACTR3C,ABLIM1,CORO1B,MYO7A,ABLIM3,GAS2L1,SHROOM2,PICK1,ACTN1,SHROOM3,MYO1B,GJB6,SPTB,ITPRID2,CAPG,CYFIP1,TWF1,MYO19,GSN,HIP1R,TRPV4,FMNL2
TF	Factor: TFAP2A; motif: YGCCCNNRGGCN	TF:M04146	3.59667e-05	14.763	4.4441	6259	2774	1103	18911	KIAA1522,CTSV,LAMA5,CELSR1,SHTN1,RIPK4,KRT80,EFNA1,RHPN2,SOX13,HSPA1A,PPL,CLDN4,BAIAP2,PIP4K2C,P2RY2,BCAM,CHMP4C,PLEKHG3,PDGFB,SPR,MYO5B,EEF1A2,EPB41L1,F11R,WFDC2,WNT7B,KRT15,MYH14,ARHGAP39,CYB561,PIGT,LAPTM4B,TFAP2C,SLC39A1,ITGB4,LLGL2,FOXA1,KIAA1671,MAP7,ETNK2,KLC3,SOWAHC,PCDH1,C19ORF33,LYPD3,MAP3K9,STARD10,ACOT4,AGRN,EFNA5,KIAA0895,CEP170B,HES1,TMEM54,S100A2,DSG2,TRIM47,CLDN9,BCAP31,RTL8A,PRSS…
WP	Glucocorticoid Receptor Pathway	WP:WP2880	3.61553e-05	14.7554	4.44183	70	2762	28	18911	B3GNT5,SCNN1A,ETNK2,PRRG4,PLK2,ADGRF4,AMIGO2,EPB41L4B,RXRA,S100P,SLC19A2,PPP1R14C,TNS4,JUN,BHLHE40,LRRC8A,FGFBP1,THBD,KTN1,CPEB4,EDN2,GPR153,ENC1,CCL20,DNER,FGD4,CDC42EP3,ABHD2
TF	Factor: CNOT3; motif: GGCCGCGSSS	TF:M01253	3.65146e-05	14.7412	4.43753	3800	4009	973	18911	TSPAN15,CTSV,KRT8,CELSR1,TUFT1,KRT18,FAM241B,BAIAP2,PLPP2,FAM83H,CHMP4C,PLEKHG3,MYO5B,EPCAM,EPB41L1,WFDC2,PTPRF,TNFRSF21,CYB561,FOXA1,MAP7,IQANK1,MET,SOWAHC,PCDH1,ACOT4,AGRN,KIAA0895,CEP170B,TACSTD2,TMEM30B,TRIM47,BCAP31,RCE1,SDC1,SYT12,C1ORF56,WNT9A,JAG2,OVOL2,CDC42BPG,PRPF6,TJP1,RGL3,SLC2A4RG,GRHL1,PPP1R26,CAPN2,REPS2,INHBB,EGLN3,CLDN7,TMC7,PKP2,KLF5,CITED4,TBC1D8,CDH3,KRT19,SLC22A5,PRRG4,UPP1,…
TF	Factor: LUMAN; motif: CYCAGCYYCY; match class: 1	TF:M09729_1	3.7094e-05	14.7185	4.4307	4409	3243	934	18911	CELSR1,SHTN1,TMEM184A,KRT80,KRT18,BAIAP2L1,EFNA1,FAM241B,BAIAP2,MAL2,FAM83H,P2RY2,BCAM,PLEKHG3,PDGFB,ELF3,EEF1A2,EPCAM,ARHGEF16,EPB41L1,GRB7,PTPRF,TNFRSF21,KRT15,AIF1L,CYB561,TFAP2C,SLC39A1,CDS1,LLGL2,SCNN1A,VWA1,IQANK1,KLC3,MET,PCDH1,C19ORF33,EFNA5,ST6GALNAC2,CDH1,LAMB3,S100A2,DSG2,TRIM47,CLDN9,CTTN,PRSS22,SYT12,C1ORF56,WNT9A,JAG2,TACC2,OVOL2,ZNF185,ATP1B1,CLMN,SSH3,GPRC5C,CDC42BPG,PRPF6,GRAMD2A…
GO:BP	salivary gland development	GO:0007431	3.70947e-05	14.7184	4.43069	36	2400	19	18911	LAMA5,ESRP2,EGFR,CLCN2,DAG1,FGFR2,PLXNA1,TGFB2,NTN4,CST3,TFCP2L1,TGM2,NFIB,SEMA3A,PDGFA,SEMA3C,BMP7,NRP1,PAX6
GO:BP	cellular component organization or biogenesis	GO:0071840	3.92941e-05	14.6353	4.40567	6456	522	248	18911	CTSV,LAMA5,KRT8,CELSR1,SHTN1,KRT18,BAIAP2L1,EFNA1,HSPA1A,HSPA1B,DDX27,PPL,MAP3K13,DDR1,CLDN4,BAIAP2,TOM1L1,TLCD1,PIP4K2C,FAM83H,PKP3,CHMP4C,RAB5IF,PDGFB,ELF3,MYO5B,SDC4,EPB41L1,PAK4,GRB7,F11R,PTPRF,PATJ,TNFRSF21,WNT7B,KRT15,TSKU,AIF1L,MYH14,ARHGAP39,LAPTM4B,ITGB4,CDS1,LLGL2,FOXA1,MAP7,VWA1,VAPB,MET,ITGB6,PMEPA1,ACOT4,AGRN,EFNA5,SFN,PERP,HES1,TACSTD2,CDH1,TMEM30B,LAMB3,DSG2,CLDN9,CLDN1,CTTN,BCAP31…
WP	Mechanoregulation and pathology of YAP/TAZ via Hippo and non-Hippo mechanisms	WP:WP4534	3.93974e-05	14.6315	4.40453	46	907	13	18911	PAK4,ITGB4,ITGB6,CDH1,CTNNA1,ITGB5,TEAD3,TEAD4,TEAD1,PAK6,ITGB8,MAP4K3,STK3
TF	Factor: EKLF; motif: NGGGYGKGGCNNGG; match class: 1	TF:M09969_1	4.00884e-05	14.6065	4.39698	1436	4303	436	18911	CELSR1,EFNA1,PPL,FAM83H,IGSF3,BCAM,EEF1A2,LLGL2,B3GNT5,VWA1,IQANK1,TSPAN13,SOWAHC,LYPD3,AGRN,CEP170B,LAMB3,BCAP31,RCE1,JAG2,CLMN,CMTM4,SHB,RGL3,SLC2A4RG,PPP1R26,PLEKHG6,INHBB,MPP3,MARVELD2,G6PD,TBC1D8,SPIRE2,SPINT1,CUEDC1,SEMA4B,CACNG4,PANX2,TMEM40,NUDT14,STX1A,POR,CTSD,COBL,HMGB3,TSEN34,LTBP3,MICALL2,TNKS1BP1,GRTP1,HOOK1,GNG4,L1CAM,ARHGAP29,RNF223,FAM131C,ARFGEF3,CCDC85C,C1ORF210,CDC42BPB,ESPN,C…
WP	Focal Adhesion	WP:WP306	4.05455e-05	14.5901	4.39206	197	893	28	18911	LAMA5,PDGFB,PAK4,ITGB4,MET,ITGB6,LAMB3,STYK1,CAPN2,LAMC2,ITGA3,LAMA3,BCAR1,EGFR,PTK6,PXN,LAMB1,RAC1,TNK1,ITGB5,ITGA2,ERBB2,CAV2,PAK6,PTK2,ITGB8,PIK3CB,COL4A6
GO:BP	gland development	GO:0048732	4.1845e-05	14.5446	4.37836	451	1903	85	18911	LAMA5,KRT18,DDR1,IGSF3,ELF3,WNT7B,FOXA1,MET,ESRP2,HES1,CDH1,CLDN1,PTPN3,LSR,TGFA,SIX4,RAP1GAP,AURKA,IRF6,EGFR,LRP5,COBL,EPHA2,ALDH1A3,PBX1,CYP1A1,SCRIB,CLCN2,DAG1,ITGA2,FA2H,MDK,AREG,ATP2C2,SERPINB5,FGFR2,PLXNA1,FOXC1,WNT4,SOX2,SRD5A1,TGFB2,FADD,ELF5,RXRA,NTN4,SIX1,SLC9A3R1,SRC,WNT3,ARHGAP5,HOXA3,CEBPB,IQGAP3,MESP1,CST3,XDH,TFCP2L1,JUN,TGM2,NTN1,CCDC40,NFIB,SERPINA5,SEMA3A,CEACAM1,PDGFA,MTX1,PSAP…
HP	Mitten deformity	HP:0004057	4.59813e-05	14.4086	4.33742	8	269	5	18911	ITGB4,LAMB3,LAMC2,DSP,LAMA3
HP	Junctional split	HP:0003341	4.63783e-05	14.3962	4.33369	7	327	5	18911	ITGB4,LAMB3,LAMC2,LAMA3,PLEC
HP	Fragile skin	HP:0001030	4.67174e-05	14.3857	4.33052	30	327	8	18911	ITGB4,LAMB3,LAMC2,DSP,JUP,ITGA3,LAMA3,PLEC
HP	Aplasia/Hypoplasia of the bladder	HP:0010476	4.67936e-05	14.3833	4.32981	11	1813	9	18911	ITGB4,LAMB3,LAMC2,LAMA3,PLEC,WNT4,GRIP1,FREM2,ITGA6
GO:BP	cell junction maintenance	GO:0034331	4.83489e-05	14.3362	4.31561	37	631	11	18911	CLDN1,TJP1,KIFC3,PLEKHA7,CLDN3,INAVA,F2RL1,CAMSAP3,PCLO,SHANK2,OPHN1
TF	Factor: GKLF; motif: NNRRGRRNGNSNNN	TF:M07040	4.94904e-05	14.3025	4.30548	12113	3250	2329	18911	TSPAN15,KIAA1522,CTSV,LAMA5,CELSR1,SHTN1,RIPK4,TMEM184A,KRT80,BAIAP2L1,EFNA1,RHPN2,HSPA1A,MLF1,HSPA1B,WWC1,PPL,DDR1,CLDN4,FAM241B,BAIAP2,ADGRG1,MAL2,TLCD1,PLPP2,PIP4K2C,FAM83H,IGSF3,P2RY2,BCAM,PKP3,PLEKHG3,RAB5IF,PDGFB,RASEF,PRXL2A,CCNJL,SPR,ELF3,MYO5B,EEF1A2,EPCAM,SDC4,ARHGEF16,NHLRC1,EPB41L1,PAK4,GRB7,F11R,WFDC2,PTPRF,PATJ,TNFRSF21,WNT7B,KRT15,TSKU,AIF1L,MYH14,CYB561,TSPAN6,LAPTM4B,ANKEF1,SLC39…
TF	Factor: E2F-1; motif: NGGGCGGGARV	TF:M07206	4.98255e-05	14.2928	4.30255	13878	1603	1330	18911	TSPAN15,KIAA1522,CTSV,LAMA5,KRT8,CELSR1,TUFT1,SHTN1,RIPK4,TMEM184A,KRT80,KRT18,BAIAP2L1,EFNA1,RHPN2,MLF1,HSPA1B,DDX27,WWC1,PPL,DDR1,CLDN4,FAM241B,BAIAP2,ADGRG1,MAL2,TOM1L1,TLCD1,PLPP2,PIP4K2C,FAM83H,IGSF3,P2RY2,BCAM,PKP3,CHMP4C,PLEKHG3,RAB5IF,PDGFB,RASEF,PRXL2A,CCNJL,SPR,ELF3,MYO5B,EEF1A2,EPCAM,SDC4,ARHGEF16,NHLRC1,EPB41L1,PAK4,GRB7,F11R,WFDC2,PTPRF,PATJ,TNFRSF21,WNT7B,KRT15,AIF1L,MYH14,CYB561,TS…
GO:BP	establishment of skin barrier	GO:0061436	5.02641e-05	14.2801	4.29874	25	1009	11	18911	CLDN4,MET,SFN,CLDN1,LSR,GRHL1,KDF1,FA2H,TMEM79,CYP26B1,KRT16
GO:MF	protein binding involved in heterotypic cell-cell adhesion	GO:0086080	5.26054e-05	14.2144	4.27897	13	385	6	18911	DSG2,DSC2,PKP2,DSP,JUP,CXADR
GO:BP	regulation of localization	GO:0032879	5.3974e-05	14.1774	4.26782	2733	538	131	18911	LAMA5,SHTN1,EFNA1,HSPA1A,WWC1,CLDN4,ADGRG1,FAM83H,P2RY2,PDGFB,EPCAM,SDC4,ARHGEF16,NHLRC1,GRB7,LLGL2,TSPAN13,MET,EFNA5,SFN,TACSTD2,CDH1,TMEM30B,DSG2,CLDN1,BCAP31,SDC1,SYT12,CARD10,ATP1B1,PTPN3,TJP1,GRAMD2A,MARVELD3,STON2,ZNF205,DSC2,SIX4,PLS1,INHBB,WASL,LAMC2,PKP2,CXCL16,G6PD,CDH3,YTHDF1,DLG5,LMNA,DSP,PLK2,GCNT2,SYT7,SEMA4B,JUP,PARD6B,CACNG4,ITGA3,GIPC1,MISP,ERBB3,LAMA3,PROM2,STX1A,MCOLN3,CLDN3,OC…
GO:MF	phospholipid binding	GO:0005543	5.43018e-05	14.1686	4.26519	452	2321	95	18911	GRB7,LAPTM4B,EPN3,SYT12,GRAMD2A,SYT7,PLEK2,SPTBN2,SYT17,PARD3,ANXA8L1,OSBPL2,PACSIN3,AGAP1,ANXA3,ANXA9,PLEKHA5,GSDMC,PIGU,ANXA8,SVIL,PCLO,ARHGAP32,PLEKHN1,PXDC1,OPHN1,PFN2,PLA2G10,ARAP3,MYOF,MARK1,PHLDA2,SYT8,SYTL5,ANXA2,SNX24,MYO10,BAIAP3,SEC14L2,SYTL4,PLD1,NSFL1C,PPT1,F3,WDR45B,FCHO2,SMURF1,EPN2,PRKCI,CHMP3,SNX7,DAB2IP,JAG1,ESYT3,SERPINA5,UQCC3,BSCL2,PSAP,NUP62CL,GOLPH3,ANXA1,MCF2L,SDCBP2,SYT13…
GO:CC	cornified envelope	GO:0001533	5.45119e-05	14.1631	4.26351	43	1646	19	18911	PPL,PKP3,DSG2,DSC2,PKP2,DSP,JUP,EVPL,SCEL,TCHH,CST6,PI3,CNFN,IVL,SPRR1B,SPRR3,DSC3,PKP1,ANXA1
TF	Factor: E12; motif: RRCAGGTGNCV	TF:M00693	5.65443e-05	14.1103	4.24761	2837	2977	584	18911	LAMA5,KRT8,TMEM184A,KRT18,RHPN2,WWC1,PPL,MAL2,IGSF3,PKP3,RASEF,CCNJL,ELF3,MYO5B,NHLRC1,GRB7,F11R,PTPRF,TNFRSF21,WNT7B,TSKU,CYB561,TFAP2C,CDS1,KIAA1671,SCNN1A,MAP7,VWA1,ETNK2,PCDH1,LYPD3,MAP3K9,ESRP2,KRT7,SFN,ST6GALNAC2,TMEM54,DSG2,CLDN1,SLC25A13,CARD10,ATP1B1,REPS2,MAB21L4,EGLN3,MUC1,MPP3,PKP2,DNAH14,G6PD,MB,ADRM1,B3GNT3,GRHL2,NANOS1,PLK2,JUP,PANX2,ABHD11,WFDC3,RASSF10,MISP,GOLM1,TPD52L1,LAMA3,FR…
TF	Factor: BTEB4; motif: NCCACGCCCM; match class: 1	TF:M12186_1	5.65935e-05	14.109	4.24723	3799	2656	675	18911	TSPAN15,CELSR1,TMEM184A,BAIAP2L1,EFNA1,RHPN2,DDX27,WWC1,PPL,DDR1,BAIAP2,PLPP2,PIP4K2C,FAM83H,IGSF3,BCAM,PKP3,EEF1A2,EPCAM,ARHGEF16,NHLRC1,PAK4,GRB7,WFDC2,PATJ,MYH14,CDS1,LLGL2,B3GNT5,VWA1,IQANK1,KLC3,SOWAHC,C19ORF33,LYPD3,CGN,MAP3K9,ESRP2,ACOT4,AGRN,CEP170B,DSG2,EPN3,CTTN,BCAP31,RCE1,SDC1,WNT9A,JAG2,CLMN,SSH3,TJP1,CMTM4,SHB,RGL3,HM13,SLC2A4RG,PPP1R26,RAP1GAP,REPS2,PLEKHG6,INHBB,MPP3,PKP2,KLF5,MAR…
GO:BP	regulation of cell-matrix adhesion	GO:0001952	5.67148e-05	14.1059	4.2463	123	1277	28	18911	DDR1,SDC4,EFNA5,JUP,SEMA3E,LIMCH1,DUSP3,EMP2,ADAM15,RHOD,RAC1,CAMSAP3,PHLDB2,PRKCZ,S100A10,DAG1,RIN2,PTK2,PIK3CB,WNT4,EPHA1,FERMT1,DMTN,SRC,CX3CL1,CEACAM6,EPB41L5,FUT1
TF	Factor: Egr-1; motif: NNNNGCGKGGGYGGNRN	TF:M09897	5.67188e-05	14.1058	4.24627	4076	2854	766	18911	KIAA1522,KRT8,KRT18,BAIAP2L1,WWC1,PPL,BAIAP2,FAM83H,P2RY2,EEF1A2,SDC4,ARHGEF16,PAK4,GRB7,PTPRF,PATJ,CYB561,LAPTM4B,ANKEF1,TFAP2C,SLC39A1,CDS1,FOXA1,B3GNT5,ETNK2,IQANK1,TSPAN13,SOWAHC,ESRP2,KRT7,AGRN,ST6GALNAC2,CEP170B,CTTN,BCAP31,FNBP1L,CARD10,WNT9A,JAG2,OVOL2,ATP1B1,ABCC3,CLMN,PTPN3,SSH3,LSR,GPRC5C,CDC42BPG,PRPF6,TJP1,GRHL1,RAP1GAP,EPHX1,REPS2,INHBB,WASL,MUC1,MPP3,PKP2,MARVELD2,DNAH14,G6PD,CTNND…
GO:BP	regulation of cellular component movement	GO:0051270	6.17337e-05	13.9836	4.20948	1035	518	65	18911	LAMA5,SHTN1,EFNA1,CLDN4,ADGRG1,FAM83H,PDGFB,EPCAM,SDC4,GRB7,MET,TACSTD2,CDH1,DSG2,CLDN1,CARD10,TJP1,MARVELD3,DSC2,WASL,LAMC2,PKP2,CXCL16,YTHDF1,DLG5,LMNA,DSP,PLK2,GCNT2,SEMA4B,JUP,PARD6B,ITGA3,ERBB3,LAMA3,CLDN3,BCAR1,EGFR,OSGIN1,EPPK1,SEMA3E,LIMCH1,EPHA2,PTPRK,SPINT2,RAB25,DUSP3,MTUS1,F2RL1,ANXA3,LAMB1,EMP2,ADAM15,RHOD,SMIM22,RAC1,BTC,CTNNA1,CARMIL1,CAMSAP3,FAM110C,S100A14,PHLDB2,APP,SRCIN1
TF	Factor: Egr-1; motif: NNNNNGYGKGGGNGGGNN; match class: 1	TF:M09603_1	6.35365e-05	13.9421	4.19698	1274	3470	326	18911	KRT8,KRT18,BAIAP2L1,RHPN2,BAIAP2,P2RY2,EEF1A2,PATJ,ANKEF1,ETNK2,AGRN,CEP170B,BCAP31,FNBP1L,CARD10,JAG2,ATP1B1,PTPN3,CDC42BPG,TJP1,GRHL1,RAP1GAP,REPS2,PKP2,G6PD,SPINT1,CUEDC1,KDF1,TMEM40,PLEKHA7,PCSK1N,HID1,IL13RA1,SYT17,MRGBP,PLEKHA6,LTBP3,SERTAD4,GRTP1,HOOK1,ARHGAP8,GNG4,OSBPL2,INAVA,SNCG,CXADR,ATP9A,RHOD,CDC42BPB,TNNT1,ESPN,PBX1,NR2F6,SRXN1,FAM110C,CYP1A1,RASSF7,MID2,SIK1B,ZDHHC9,SUSD4,TEAD3,SR…
GO:BP	gland morphogenesis	GO:0022612	6.42095e-05	13.9269	4.1924	127	3649	52	18911	LAMA5,DDR1,ELF3,FOXA1,ESRP2,TGFA,EGFR,LRP5,EPHA2,SCRIB,DAG1,MDK,AREG,SERPINB5,FGFR2,PLXNA1,WNT4,TGFB2,RXRA,NTN4,SLC9A3R1,SRC,CEBPB,TGM2,NTN1,NFIB,SEMA3A,CEACAM1,PDGFA,SOX9,CAV1,CAPN1,SEMA3C,BMP7,HPN,NRP1,RARG,CYP7B1,WNT3A,PAX6,VDR,KDM5B,MSX2,DUOX2,SULF2,LRP6,TNC,TP63,SHH,SOSTDC1,PGR,HOXD13
KEGG	ECM-receptor interaction	KEGG:04512	6.46591e-05	13.9168	4.18937	88	584	14	18911	LAMA5,SDC4,ITGB4,ITGB6,AGRN,LAMB3,SDC1,LAMC2,ITGA3,LAMA3,LAMB1,ITGB5,DAG1,ITGA2
GO:BP	cellular component morphogenesis	GO:0032989	6.48276e-05	13.913	4.18824	804	1226	94	18911	LAMA5,KRT8,SHTN1,EFNA1,MAP3K13,DDR1,BAIAP2,GRB7,WNT7B,TSKU,MYH14,EFNA5,CTTN,SIX4,RAP1GAP,WASL,LAMC2,AURKA,KRT19,ID1,YTHDF1,NCKAP1,SEMA4B,PARD6B,SPTBN2,LAMA3,EGFR,RYK,SYT17,COBL,IGSF9,SEMA3E,PARD3,EPHA2,OBSL1,L1CAM,RAC1,TNNT1,NECTIN2,PHLDB2,PRKCZ,APP,SRCIN1,SHANK2,DAG1,LMTK2,ERBB2,NTF4,OPHN1,NUBPL,CRABP2,TMEM106B,B4GALT5,KLK8,ANK3,LHX1,SKIL,PLA2G10,MDK,CD9,PAK6,PTK2,FGFR2,ARTN,PLXNA1,NEDD4L,CELSR2…
GO:BP	cellular component assembly	GO:0022607	6.71713e-05	13.8618	4.17282	2892	563	140	18911	LAMA5,KRT8,SHTN1,BAIAP2L1,HSPA1A,HSPA1B,CLDN4,BAIAP2,TLCD1,PIP4K2C,PKP3,CHMP4C,RAB5IF,SDC4,GRB7,F11R,PATJ,AIF1L,ITGB4,CDS1,MET,PMEPA1,AGRN,EFNA5,HES1,TACSTD2,CDH1,LAMB3,CLDN9,CLDN1,CTTN,SDC1,FNBP1L,CARD10,SSH3,LSR,PRPF6,TGFA,TJP1,MARVELD3,SIX4,RAP1GAP,PLS1,REPS2,WASL,CLDN7,LAMC2,PKP2,VMP1,KLF5,MARVELD2,CTNND1,ADRM1,AURKA,SPIRE2,KRT19,GRHL2,ID1,DLG5,PLK2,NCKAP1,SYT7,JUP,PARD6B,PLEK2,MISP,SPTBN2,LA…
HPA	endometrium 1; glandular cells[‚â•Medium]	HPA:0160052	6.81615e-05	13.8407	4.16646	4835	1243	401	18911	TSPAN15,KIAA1522,KRT8,TUFT1,KRT18,BAIAP2L1,HSPA1A,WWC1,DDR1,CLDN4,BAIAP2,TLCD1,CHMP4C,PLEKHG3,PDGFB,RASEF,PRXL2A,ELF3,MYO5B,EPCAM,SDC4,ARHGEF16,GRB7,F11R,WFDC2,PATJ,TNFRSF21,AIF1L,MYH14,TSPAN6,ANKEF1,CDS1,KIAA1671,SCNN1A,MAP7,VAPB,MET,SOWAHC,PCDH1,CGN,KRT7,EFNA5,CEP170B,CDH1,DSG2,CLDN1,CTTN,BCAP31,RCE1,FNBP1L,CARD10,JAG2,TACC2,ATP1B1,ABCC3,SSH3,PRPF6,TGFA,TJP1,MPZL2,STON2,DSC2,HM13,STAU1,RAP1GAP,…
GO:MF	protein-containing complex binding	GO:0044877	6.90123e-05	13.8228	4.16107	1240	606	76	18911	CTSV,LAMA5,KRT8,SHTN1,MAP3K13,DDR1,ADGRG1,FAM83H,PDGFB,MYO5B,EPCAM,F11R,PTPRF,AIF1L,MYH14,ITGB4,ITGB6,LAMB3,CTTN,BCAP31,ZNF185,ATP1B1,CLMN,PRPF6,CAPN2,PLS1,PKP2,ADRM1,KRT19,ID1,YTHDF1,PLK2,JUP,ITGA3,MISP,LAMA3,STX1A,EVPL,EGFR,DNTTIP1,EPS8L1,EPPK1,MICALL2,TNKS1BP1,INHA,ARPC1A,CXADR,ADGRG6,EIF6,LAMB1,EMP2,ADAM15,ANXA8,MYO6,CLU,SVIL,RAC1,CDC42BPB,DST,ESPN,CTNNA1,CARMIL1,CAMSAP3,ITGB5,PRKCZ,KIF3B,SQS…
GO:BP	regulation of epidermal cell differentiation	GO:0045604	6.94696e-05	13.8133	4.15821	60	277	10	18911	CTSV,ESRP1,SFN,HES1,OVOL2,GRHL1,GRHL2,KDF1,TRIM16,ERRFI1
GO:MF	serine-type endopeptidase inhibitor activity	GO:0004867	6.947e-05	13.8132	4.1582	97	4962	50	18911	WFDC2,SLPI,SPINT1,WFDC3,PCSK1N,SPINT2,APP,SERPINB5,SERPINA1,ANXA2,PI3,APLP2,COL28A1,SPINK5,SERPINA5,PAPLN,ANOS1,CD109,SERPINB6,A2ML1,SERPINF2,CPAMD8,SERPINB13,SERPINA3,SERPINH1,EPPIN,SERPINA6,COL7A1,WFDC10B,SERPIND1,HRG,CRIM1,WFDC13,WFDC6,FURIN,SPINK1,SERPINA10,SERPINB1,WFIKKN1,AMBP,WFDC11,SERPINB3,WFDC8,TFPI2,SERPINB4,TFPI,SPINK8,SERPINA4,ITIH2,WFDC10A
GO:BP	regulation of cell adhesion	GO:0030155	6.98157e-05	13.8061	4.15605	718	1367	96	18911	LAMA5,EFNA1,SOX13,DDR1,ADGRG1,PDGFB,EPCAM,SDC4,F11R,TNFRSF21,FOXA1,EFNA5,HES1,TACSTD2,CDH1,JAG2,TJP1,MUC1,DLG5,GCNT2,JUP,ITGA3,ERBB3,LAMA3,SEMA3E,LIMCH1,EPHA2,STX3,SPINT2,DUSP3,EMP2,ADAM15,AGR2,RHOD,VTCN1,RAC1,CD24,CARMIL1,CAMSAP3,SCRIB,PHLDB2,PRKCZ,YES1,S100A10,CD276,DAG1,ITGA2,IL18,ITCH,ERBB2,PTPRU,RDX,EPB41L4B,ANK3,MDK,RIN2,CD9,PTK2,PLXNA1,CELSR2,PIK3CB,WNT4,SOX2,MYO10,AFDN,EPHA1,TGFB2,FERMT1,…
TF	Factor: NF-KAPPAB1; motif: NGGKRNTTYCCCN	TF:M08952	7.00086e-05	13.8021	4.15485	7399	2051	968	18911	KIAA1522,CTSV,CELSR1,TUFT1,TMEM184A,BAIAP2L1,RHPN2,HSPA1A,WWC1,PPL,DDR1,CLDN4,FAM241B,BAIAP2,ADGRG1,TLCD1,PIP4K2C,FAM83H,P2RY2,BCAM,CHMP4C,RASEF,SPR,ELF3,MYO5B,EEF1A2,EPCAM,EPB41L1,PAK4,GRB7,F11R,WFDC2,TNFRSF21,AIF1L,CYB561,TSPAN6,ANKEF1,LLGL2,B3GNT5,SCNN1A,VWA1,ETNK2,IQANK1,VAPB,SOWAHC,PCDH1,C19ORF33,PMEPA1,ESRP2,STARD10,KRT7,AGRN,EFNA5,TMEM132A,CDH1,TMEM54,AP1M2,LAMB3,S100A2,TRIM47,CLDN9,CLDN1,…
GO:BP	positive regulation of supramolecular fiber organization	GO:1902905	7.09547e-05	13.7827	4.14902	208	561	24	18911	BAIAP2L1,HSPA1A,HSPA1B,BAIAP2,SDC4,MET,CTTN,WASL,SPIRE2,ID1,NCKAP1,OCLN,LIMCH1,PXN,ARPC1A,ARHGEF5,F2RL1,CDC42EP4,CLU,RAC1,CARMIL1,APP,S100A10,DSTN
TF	Factor: ER-beta; motif: RGGTCASCNTGMCCY; match class: 1	TF:M09910_1	7.13805e-05	13.7741	4.14642	3907	564	182	18911	LAMA5,CELSR1,TUFT1,TMEM184A,KRT80,BAIAP2L1,RHPN2,ADGRG1,MAL2,TLCD1,PLPP2,FAM83H,PKP3,EEF1A2,ARHGEF16,NHLRC1,F11R,PATJ,WNT7B,CYB561,TFAP2C,LLGL2,FOXA1,MAP7,PON3,IQANK1,C19ORF33,CGN,ESRP1,KRT7,AGRN,KIAA0895,ST6GALNAC2,TMEM132A,CEP170B,TACSTD2,TMEM30B,S100A2,EPN3,RTL8A,SDC1,FNBP1L,CARD10,C1ORF56,WNT9A,JAG2,OVOL2,ABCC3,PTPN3,SSH3,TMPRSS13,CDC42BPG,TGFA,TJP1,GRAMD2A,MOCS3,SIX4,SLC2A4RG,GRHL1,RAP1GAP,R…
REAC	Keratinization	REAC:R-HSA-6805567	7.13847e-05	13.774	4.1464	127	244	15	18911	KRT8,KRT80,KRT18,PPL,PKP3,KRT15,KRT7,PERP,DSG2,DSC2,KRT4,PKP2,KRT19,DSP,JUP
TF	Factor: AP-2gamma:Elk-1; motif: NGCCKNRGGSGRCGGAAGTG; match class: 1	TF:M08441_1	7.18125e-05	13.7654	4.1438	12204	1682	1243	18911	TSPAN15,KIAA1522,CTSV,LAMA5,KRT8,CELSR1,TUFT1,SHTN1,RIPK4,KRT18,BAIAP2L1,RHPN2,MLF1,DDX27,WWC1,PPL,DDR1,CLDN4,BAIAP2,ADGRG1,MAL2,TOM1L1,TLCD1,PLPP2,PIP4K2C,FAM83H,IGSF3,P2RY2,PKP3,PLEKHG3,RAB5IF,PDGFB,CCNJL,SPR,ELF3,MYO5B,EEF1A2,EPCAM,SDC4,ARHGEF16,EPB41L1,PAK4,GRB7,WFDC2,PTPRF,PATJ,WNT7B,KRT15,AIF1L,MYH14,ARHGAP39,CYB561,TSPAN6,ANKEF1,TFAP2C,SLC39A1,ITGB4,CDS1,LLGL2,FOXA1,KIAA1671,B3GNT5,SCNN1A,…
GO:BP	morphogenesis of a branching structure	GO:0001763	7.29931e-05	13.7419	4.13672	199	3903	76	18911	LAMA5,CELSR1,MAP3K13,DDR1,FOXA1,MET,ESRP2,TACSTD2,SIX4,GRHL2,DLG5,SPINT1,LRP5,SEMA3E,EPHA2,SPINT2,PBX1,DAG1,ST14,LHX1,MDK,AREG,FGFR2,PLXNA1,WNT4,LGR4,RXRA,GREB1L,NTN4,YAP1,SIX1,SRC,CTSH,EDN1,NPNT,TGM2,SEMA3A,PDGFA,HOXB7,ADAMTS16,FZD5,SOX9,SEMA3C,BMP7,SIX2,HOXD11,CTNNBIP1,NRP1,VANGL2,WNT6,EGF,SOCS3,NRARP,VDR,EXT1,KDM5B,DLG1,MSX2,PPP1CA,ACVR1,GBX2,ADM,FKBPL,LRP6,SPRY1,TNC,TP63,CTSZ,SHH,BMP2,PGR,HOX…
TF	Factor: MAZ; motif: GGGGAGGG	TF:M00649	8.38988e-05	13.541	4.07624	8905	1280	734	18911	KIAA1522,CTSV,LAMA5,TUFT1,TMEM184A,KRT80,BAIAP2L1,EFNA1,RHPN2,SOX13,HSPA1A,MLF1,HSPA1B,DDX27,WWC1,DDR1,CLDN4,FAM241B,BAIAP2,ADGRG1,MAL2,TOM1L1,TLCD1,PLPP2,PIP4K2C,FAM83H,IGSF3,P2RY2,PKP3,RAB5IF,PDGFB,PRXL2A,CCNJL,SPR,ELF3,MYO5B,EEF1A2,EPCAM,SDC4,ARHGEF16,EPB41L1,GRB7,F11R,WFDC2,PTPRF,PATJ,TNFRSF21,WNT7B,AIF1L,CYB561,TSPAN6,LAPTM4B,SLC39A1,ITGB4,LLGL2,FOXA1,KIAA1671,SCNN1A,MAP7,VWA1,ETNK2,IQANK1,P…
HPA	cervix, uterine; squamous epithelial cells[‚â•Low]	HPA:0110221	8.49408e-05	13.5232	4.07088	5170	1247	425	18911	TSPAN15,TUFT1,RIPK4,BAIAP2L1,HSPA1A,HSPA1B,WWC1,PPL,DDR1,CLDN4,BAIAP2,FAM83H,PKP3,CHMP4C,PLEKHG3,PDGFB,RASEF,PRXL2A,MYO5B,SDC4,ARHGEF16,GRB7,F11R,TNFRSF21,MYH14,TSPAN6,ANKEF1,TFAP2C,ITGB4,KIAA1671,SCNN1A,MAP7,ETNK2,KLC3,VAPB,MET,SOWAHC,PCDH1,LYPD3,MAP3K9,ESRP1,EFNA5,SFN,TACSTD2,CDH1,S100A2,DSG2,CLDN1,CTTN,BCAP31,RCE1,SDC1,FNBP1L,SLC25A13,CARD10,JAG2,TACC2,ZNF185,PTPN3,CDC42BPG,PRPF6,TJP1,MPZL2,MI…
GO:MF	lipid binding	GO:0008289	8.61728e-05	13.5024	4.06463	771	4854	263	18911	GRB7,LAPTM4B,STARD10,EPN3,SYT12,FNBP1L,GRAMD2A,SYT7,PLEK2,SPTBN2,PROM2,MCOLN3,SYT17,PARD3,ANXA8L1,OSBPL2,STX3,PACSIN3,AGAP1,ARHGEF5,ANXA3,ANXA9,PLEKHA5,GSDMC,PIGU,ANXA8,SVIL,PCLO,S100A9,ARHGAP32,SULT2B1,PLEKHN1,PXDC1,OPHN1,RBP7,CRABP2,HSPA2,PGRMC1,PFN2,PLA2G10,ARAP3,MYOF,MARK1,PLEKHA1,PHLDA2,SYT8,RBP1,HSD11B2,SYTL5,DOK7,ANXA2,PITPNM3,SNX24,S100A13,MYO10,NR2F2,PPARG,CYP26B1,BAIAP3,RXRA,SEC14L2,SYT…
REAC	Developmental Biology	REAC:R-HSA-1266738	8.66891e-05	13.4938	4.06204	960	1091	103	18911	KRT8,SHTN1,KRT80,KRT18,EFNA1,PPL,PKP3,PAK4,GRB7,KRT15,MYH14,ARHGAP39,MET,KRT7,AGRN,EFNA5,PERP,HES1,DSG2,DSC2,RAP1GAP,KRT4,WASL,PKP2,KLF5,KRT19,DSP,JUP,CACNG4,SPTBN2,STX1A,EVPL,EGFR,SEMA3E,PRSS8,EPHA2,ARPC1A,PSMA7,L1CAM,ADGRG6,LAMB1,ADGRV1,RAC1,CTNNA1,CD24,PBX1,YES1,HIST1H2BD,ARHGEF28,PSMC4,KRT78,DAG1,ITGA2,ERBB2,RDX,PSEN2,KLK5,WWTR1,KLK8,TEAD1,ST14,TCHH,AJUBA,PFN2,ANK3,KRT86,KRT17,PAK6,PTK2,PSMD4…
GO:BP	regulation of anatomical structure morphogenesis	GO:0022603	8.90966e-05	13.4543	4.05014	970	1908	162	18911	CELSR1,SHTN1,EFNA1,MAP3K13,CLDN4,BAIAP2,PAK4,F11R,MYH14,EFNA5,HES1,TACSTD2,TJP1,SIX4,ID1,PLK2,SEMA4B,JUP,CLDN3,RYK,SYT17,SEMA3E,EPHA2,OBSL1,NAXE,PSMA7,L1CAM,ANXA3,LFNG,EMP2,CDC42EP4,RHOD,RAC1,HTATIP2,CARMIL1,RHOBTB3,PHLDB2,SRCIN1,S100A10,PDCD6,PSMC4,DAG1,PAX9,ERBB2,RDX,CRABP2,LHX1,SKIL,MDK,PTK2,PSMD4,ITGB8,FGFR2,PLXNA1,FITM2,NEDD4L,CELSR2,PIK3CB,FOXC1,KIAA0319,WNT4,SPIRE1,S100A13,MYO10,BCL9L,EPHA…
TF	Factor: WT1; motif: RGGNGGGGGAGGRGGNGGRG; match class: 1	TF:M10108_1	8.91207e-05	13.4539	4.05002	2753	1994	395	18911	KIAA1522,LAMA5,KRT80,BAIAP2L1,EFNA1,RHPN2,BAIAP2,MAL2,PLPP2,P2RY2,CCNJL,EEF1A2,ARHGEF16,GRB7,AIF1L,ARHGAP39,CYB561,ANKEF1,CDS1,FOXA1,KIAA1671,SCNN1A,PCDH1,MAP3K9,ESRP2,ESRP1,KRT7,AGRN,CEP170B,HES1,DSG2,BCAP31,PRSS22,SDC1,OVOL2,ATP1B1,CLMN,LSR,GPRC5C,TJP1,STAU1,GRHL1,RAP1GAP,REPS2,CLDN7,MPP3,B3GNT3,SPIRE2,DLG5,NANOS1,SEMA4B,KDF1,CACNG4,TMEM40,PLEKHA7,SEZ6L2,SLC6A11,LRP5,PPFIA1,SYT17,BARX2,MRGBP,HM…
TF	Factor: Sp1; motif: NWRGCCACGCCCMCN; match class: 1	TF:M12152_1	9.16602e-05	13.4133	4.03782	2762	3598	661	18911	TSPAN15,TUFT1,BAIAP2L1,DDX27,WWC1,PPL,BAIAP2,TLCD1,PIP4K2C,FAM83H,IGSF3,BCAM,PKP3,EEF1A2,ARHGEF16,PAK4,GRB7,F11R,PTPRF,MYH14,SLC39A1,CDS1,LLGL2,B3GNT5,VWA1,PON3,IQANK1,KLC3,TSPAN13,MET,SOWAHC,C19ORF33,MAP3K9,ESRP2,AGRN,CEP170B,CTTN,BCAP31,JAG2,SSH3,LSR,PRPF6,TJP1,CMTM4,SHB,SLC2A4RG,GRHL1,PPP1R26,RAP1GAP,REPS2,PLEKHG6,INHBB,PKP2,CITED4,G6PD,TBC1D8,SPIRE2,UPP1,SEMA4B,CACNG4,PANX2,ABHD11,ERBB3,NUDT1…
GO:BP	synapse organization	GO:0050808	9.36305e-05	13.3827	4.02858	419	4471	153	18911	EFNA1,BAIAP2,PTPRF,WNT7B,ARHGAP39,AGRN,EFNA5,CDH1,CTTN,SIX4,STAU1,WASL,DLG5,ITGA3,SPTBN2,SEZ6L2,PPFIA1,RYK,IGSF9,SEMA3E,ADGRF1,OBSL1,L1CAM,SNCG,PCLO,APP,SRCIN1,SHANK2,DAG1,ERBB2,OPHN1,KLK8,AMIGO2,PFN2,ANK3,PTK2,DOK7,NRCAM,RAB17,PPP1R9A,C3,SIX1,EFNB2,NOS1AP,EPHB2,CAST,CX3CL1,TANC1,ACHE,TANC2,ABHD17C,COL4A5,DAB2IP,CRIPT,NTN1,ACTBL2,TPBG,PLXNB1,SYBU,GPHN,FZD5,NECTIN1,ZDHHC12,SDK1,IL1RAP,LAMB2,DKK1,L…
GO:BP	regulation of locomotion	GO:0040012	9.4495e-05	13.3694	4.02459	998	1399	132	18911	LAMA5,SHTN1,EFNA1,CLDN4,ADGRG1,FAM83H,PDGFB,EPCAM,SDC4,GRB7,MET,TACSTD2,CDH1,CLDN1,CARD10,TJP1,MARVELD3,WASL,LAMC2,CXCL16,YTHDF1,DLG5,LMNA,PLK2,GCNT2,SEMA4B,JUP,PARD6B,ITGA3,ERBB3,LAMA3,CLDN3,BCAR1,EGFR,RYK,OSGIN1,EPPK1,SEMA3E,LIMCH1,EPHA2,PTPRK,STX3,SPINT2,RAB25,DUSP3,MTUS1,F2RL1,ANXA3,LAMB1,EMP2,ADAM15,RHOD,SMIM22,RAC1,BTC,CTNNA1,CARMIL1,CAMSAP3,FAM110C,S100A14,PHLDB2,APP,SRCIN1,CADM4,PDCD6,DAG…
GO:BP	regulation of supramolecular fiber organization	GO:1902903	9.5927e-05	13.3477	4.01806	366	637	36	18911	BAIAP2L1,HSPA1A,HSPA1B,BAIAP2,SDC4,F11R,MET,TACSTD2,CTTN,SSH3,TJP1,WASL,SPIRE2,ID1,NCKAP1,SPTBN2,OCLN,PPFIA1,LIMCH1,PXN,ARPC1A,ARHGEF5,F2RL1,CDC42EP4,CLU,SVIL,RAC1,CARMIL1,CAMSAP3,PHLDB2,APP,S100A10,DSTN,MAPRE3,MID1,RDX
GO:CC	cortical actin cytoskeleton	GO:0030864	9.62148e-05	13.3434	4.01676	82	637	17	18911	LLGL2,CDH1,CTTN,CAPN2,PLS1,WASL,KRT19,MISP,SPTBN2,COBL,MLPH,SLC2A1,RTKN,DSTN,ANLN,MYZAP,RDX
GO:BP	keratinocyte proliferation	GO:0043616	9.66203e-05	13.3373	4.01493	46	1014	15	18911	SFN,OVOL2,CDH3,KDF1,IRF6,EPPK1,PTPRK,SDR16C5,KLK8,MDK,AREG,FGFR2,FERMT1,YAP1,EFNB2
GO:BP	intermediate filament cytoskeleton organization	GO:0045104	9.91664e-05	13.2998	4.00364	51	723	13	18911	KRT18,PPL,FAM83H,PKP2,DSP,BFSP1,EVPL,EPPK1,PLEC,DST,SYNM,TCHH,KRT17
TF	Factor: Sp3; motif: NGCCACGCCCMCN; match class: 1	TF:M12153_1	9.93068e-05	13.2977	4.00302	1875	2830	381	18911	TSPAN15,BAIAP2L1,BAIAP2,TLCD1,PLPP2,PIP4K2C,FAM83H,P2RY2,BCAM,EEF1A2,ARHGEF16,PAK4,GRB7,CDS1,B3GNT5,VWA1,IQANK1,KLC3,TSPAN13,MET,SOWAHC,MAP3K9,AGRN,CEP170B,CTTN,WNT9A,JAG2,PRPF6,TJP1,CMTM4,SHB,SLC2A4RG,PPP1R26,PLEKHG6,INHBB,CITED4,G6PD,SPIRE2,ID1,UPP1,NANOS1,DSP,CACNG4,PANX2,ABHD11,NUDT14,RBM47,POR,PPFIA1,HID1,PFKFB2,MRGBP,HMGB3,TSEN34,MICALL2,PXN,EPHA2,TNKS1BP1,GRTP1,NAXE,GNG4,OSBPL2,L1CAM,ARHGA…
TF	Factor: E2F-3:FOXI1; motif: NGACACCGCGCCCAC; match class: 1	TF:M08208_1	0.000100624	13.2787	3.9973	6823	2419	1044	18911	TSPAN15,KIAA1522,LAMA5,KRT8,CELSR1,KRT18,EFNA1,RHPN2,SOX13,DDX27,WWC1,FAM241B,BAIAP2,MAL2,TOM1L1,PLPP2,PIP4K2C,FAM83H,P2RY2,PKP3,PLEKHG3,RASEF,PRXL2A,CCNJL,SPR,MYO5B,EEF1A2,EPCAM,SDC4,EPB41L1,PAK4,GRB7,PTPRF,PATJ,AIF1L,ARHGAP39,LAPTM4B,ANKEF1,CDS1,LLGL2,FOXA1,SCNN1A,VWA1,ETNK2,IQANK1,KLC3,VAPB,TSPAN13,SOWAHC,LYPD3,CGN,MAP3K9,ESRP1,AGRN,ST6GALNAC2,CEP170B,CDH1,TMEM30B,TMEM54,DSG2,TRIM47,CTTN,BCAP3…
GO:BP	regulation of cell projection organization	GO:0031344	0.000106685	13.1944	3.9719	652	1149	77	18911	SHTN1,EFNA1,MAP3K13,BAIAP2,PTPRF,AGRN,EFNA5,TACSTD2,FNBP1L,RAP1GAP,PLS1,WASL,KLF5,ID1,NCKAP1,SEMA4B,ITGA3,PLEK2,PROM2,OCLN,RYK,EPS8L1,COBL,SEMA3E,PTK6,EPHA2,OBSL1,L1CAM,F2RL1,CDC42EP4,RAC1,CARMIL1,KLK6,FAM110C,SRCIN1,S100A9,ANLN,ITGA2,EPS8L2,RDX,CRABP2,TMEM106B,TBC1D30,KLK8,PFN2,SKIL,LCN2,MDK,MARK1,PTK2,MAPK15,PLXNA1,NEDD4L,KIAA0319,NRCAM,RAB17,MYO10,KLF4,DMTN,MBOAT1,PPP1R9A,FSTL4,YAP1,EFNB2,PLD1…
GO:BP	cell part morphogenesis	GO:0032990	0.000107081	13.189	3.97029	711	1149	81	18911	LAMA5,SHTN1,EFNA1,MAP3K13,DDR1,BAIAP2,GRB7,WNT7B,TSKU,MYH14,EFNA5,CTTN,RAP1GAP,WASL,LAMC2,AURKA,ID1,YTHDF1,NCKAP1,SEMA4B,PARD6B,SPTBN2,LAMA3,EGFR,RYK,SYT17,COBL,IGSF9,SEMA3E,PARD3,EPHA2,OBSL1,L1CAM,RAC1,NECTIN2,PRKCZ,APP,SRCIN1,SHANK2,DAG1,LMTK2,ERBB2,NTF4,OPHN1,NUBPL,CRABP2,TMEM106B,B4GALT5,KLK8,ANK3,LHX1,SKIL,PLA2G10,MDK,PAK6,PTK2,FGFR2,ARTN,PLXNA1,NEDD4L,CELSR2,PIK3CB,KIAA0319,NRCAM,EPHA1,IMPA…
TF	Factor: E2F-1:Elk-1; motif: SGCGCSNNAMCGGAAGT; match class: 1	TF:M08205_1	0.00010874	13.1668	3.96361	10019	2864	1725	18911	TSPAN15,KIAA1522,LAMA5,CELSR1,SHTN1,RIPK4,TMEM184A,EFNA1,RHPN2,HSPA1A,DDX27,WWC1,MAP3K13,DDR1,BAIAP2,MAL2,TOM1L1,TLCD1,PLPP2,PIP4K2C,FAM83H,IGSF3,P2RY2,PLEKHG3,RAB5IF,PDGFB,RASEF,CCNJL,MYO5B,EEF1A2,EPCAM,ARHGEF16,NHLRC1,PAK4,WFDC2,PTPRF,PATJ,AIF1L,MYH14,PIGT,LAPTM4B,ANKEF1,TFAP2C,CDS1,LLGL2,FOXA1,KIAA1671,B3GNT5,MAP7,VWA1,PON3,ETNK2,IQANK1,VAPB,TSPAN13,MET,SOWAHC,PCDH1,C19ORF33,CGN,MAP3K9,PMEPA1,…
GO:CC	cell leading edge	GO:0031252	0.000111991	13.1243	3.95082	427	2977	115	18911	SHTN1,WWC1,BAIAP2,AIF1L,ITGB4,CDH1,CTTN,CDC42BPG,WASL,CTNND1,NCKAP1,KDF1,PLEK2,OCLN,BCAR1,EPS8L1,COBL,PTK6,PXN,EPHA2,PTPRK,STX3,MYO6,DAGLA,ADGRV1,RAC1,CDC42BPB,DST,CTNNA1,CARMIL1,SCRIB,PHLDB2,PRKCZ,APP,SRCIN1,CADM4,DAG1,EPS8L2,RDX,GABRE,RAB22A,AJUBA,ARAP3,PTK2,PLEKHA1,S100A11,MYO10,FGD6,FERMT1,PPP1R9A,EPS8,RAB13,PDE9A,SLC9A3R1,S100A6,SRC,CDC42BPA,ARHGEF26,PRKCI,ENAH,EPB41L5,ABLIM1,ITGAV,GABRA3,CO…
TF	Factor: Sp1; motif: NWRGCCACGCCCMCN	TF:M12152	0.000112416	13.1189	3.94917	7069	2854	1250	18911	TSPAN15,KIAA1522,LAMA5,KRT8,CELSR1,TUFT1,RIPK4,TMEM184A,KRT18,BAIAP2L1,RHPN2,DDX27,WWC1,PPL,BAIAP2,MAL2,TOM1L1,TLCD1,PLPP2,PIP4K2C,FAM83H,IGSF3,P2RY2,BCAM,PKP3,CCNJL,MYO5B,EEF1A2,ARHGEF16,EPB41L1,PAK4,GRB7,F11R,WFDC2,PTPRF,TNFRSF21,MYH14,CYB561,PIGT,LAPTM4B,TFAP2C,SLC39A1,ITGB4,CDS1,LLGL2,B3GNT5,VWA1,PON3,IQANK1,KLC3,VAPB,TSPAN13,MET,SOWAHC,C19ORF33,LYPD3,CGN,MAP3K9,PMEPA1,ESRP2,ACOT4,KRT7,AGRN,S…
HPA	cerebral cortex	HPA:0100000	0.000113735	13.102	3.94411	7740	2017	944	18911	TSPAN15,KIAA1522,TUFT1,SHTN1,RIPK4,BAIAP2L1,HSPA1A,HSPA1B,WWC1,DDR1,CLDN4,FAM241B,BAIAP2,TLCD1,PIP4K2C,FAM83H,IGSF3,PKP3,CHMP4C,PLEKHG3,PDGFB,RASEF,PRXL2A,CCNJL,MYO5B,EEF1A2,SDC4,ARHGEF16,EPB41L1,GRB7,F11R,WFDC2,PATJ,TNFRSF21,TSKU,AIF1L,CYB561,TSPAN6,ANKEF1,ITGB4,CDS1,KIAA1671,SCNN1A,MAP7,ETNK2,VAPB,MET,PCDH1,MAP3K9,ESRP1,THRB,ACOT4,AGRN,EFNA5,TMEM132A,CEP170B,LAMB3,CTTN,BCAP31,RCE1,SYT12,FNBP1L,…
REAC	p75 NTR receptor-mediated signalling	REAC:R-HSA-193704	0.000117167	13.0591	3.93119	97	3249	38	18911	ARHGEF16,ARHGEF5,RAC1,ARHGEF35,ECT2,SQSTM1,PSEN2,PSENEN,ARHGEF37,ARHGEF26,ARHGEF10L,PRKCI,VAV2,APH1A,ARHGEF19,KALRN,PLEKHG5,MCF2L,BEX3,NGEF,IRAK1,RTN4R,BAD,TRIO,NET1,ARHGEF17,ITSN1,FGD4,ARHGEF38,ARHGEF12,PSEN1,ARHGEF3,UBC,ARHGEF4,NGFR,ARHGEF33,ARHGEF39,ARHGEF11
TF	Factor: SP1; motif: CCCCKCCCCC; match class: 1	TF:M02281_1	0.000119405	13.0318	3.92298	2473	2812	482	18911	CELSR1,BAIAP2L1,BAIAP2,TLCD1,PLPP2,PIP4K2C,FAM83H,IGSF3,PKP3,EEF1A2,ARHGEF16,PAK4,GRB7,PATJ,MYH14,ANKEF1,CDS1,FOXA1,IQANK1,SOWAHC,PCDH1,ESRP1,KRT7,AGRN,CEP170B,HES1,TMEM54,CTTN,SDC1,FNBP1L,JAG2,OVOL2,CDC42BPG,PRPF6,TJP1,SHB,STAU1,SLC2A4RG,GRHL1,RAP1GAP,REPS2,INHBB,MUC1,PKP2,KLF5,G6PD,TBC1D8,CTNND1,SPIRE2,DSP,CUEDC1,KDF1,CACNG4,PANX2,GIPC1,TMEM40,NUDT14,PLEKHA7,SEZ6L2,STX1A,PCSK1N,PPFIA1,HID1,IL13…
GO:BP	axoneme assembly	GO:0035082	0.000121501	13.0067	3.91542	75	4499	40	18911	GAS8,SPAG1,DNAH5,SPAG16,TTC12,CFAP206,FAM187A,TOGARAM1,CCDC40,CCDC103,DNAAF5,RP1,FOXJ1,SPAG17,SPEF1,HYDIN,JHY,CFAP43,FSIP2,CCDC151,CFAP65,DNAL1,CC2D2A,CFAP69,DNAAF3,TTC26,RSPH1,NEURL1,DNAI1,DNAH17,LRRC49,DNAAF4,DNAJB13,SPEF2,DRC1,CFAP74,LRRC6,RP1L1,TEKT2,CFAP97D1
HP	Congenital localized absence of skin	HP:0007383	0.000121921	13.0018	3.91392	8	327	5	18911	ITGB4,LAMB3,LAMC2,LAMA3,PLEC
GO:BP	morphogenesis of a polarized epithelium	GO:0001738	0.000126943	12.9435	3.89639	151	4921	70	18911	LAMA5,CELSR1,DLG5,LAMA3,RYK,PSMA7,RAC1,CAMSAP3,SCRIB,PSMC4,OPHN1,PSMD4,CELSR2,FZD6,SLC9A3R1,PSMD12,SMURF1,VANGL1,GRHL3,ARHGEF19,PSMA3,PSMD10,FZD5,SEM1,SAPCD2,DKK1,BRSK2,PSMB3,PSMC2,PSMD2,ANKRD6,SYNE4,WNT7A,PSMD11,SPEF1,DLG3,DAAM1,VANGL2,JHY,TTC8,PSMA2,ZNRF3,PSMB5,PSMC5,PSMF1,RAB10,PSMB4,PSMC1,TP63,FAT1,PKHD1,GPC3,DVL3,CELSR3,TIAM1,MKS1,TCF15,PSMD3,PSMB7,PSMC6,AP2M1,WNT11,FZD7,CPLANE1,PSMC3,PSME4,…
GO:BP	intermediate filament-based process	GO:0045103	0.000127636	12.9357	3.89403	52	723	13	18911	KRT18,PPL,FAM83H,PKP2,DSP,BFSP1,EVPL,EPPK1,PLEC,DST,SYNM,TCHH,KRT17
GO:CC	basolateral plasma membrane	GO:0016323	0.000127688	12.9351	3.89385	249	731	32	18911	CLDN4,PDGFB,EPCAM,MAP7,MET,TACSTD2,CLDN1,ATP1B1,TGFA,TJP1,CLDN7,MARVELD2,DSP,ITGA3,ERBB3,PROM2,EGFR,EPPK1,CXADR,DST,SLC2A1,SLC4A11,SCRIB,FOLR1,DAG1,ERBB2,ST14,SLC46A1,ATP6V1B1,MST1R,ANK3,CNNM4
TF	Factor: TWIST; motif: CACCTGG	TF:M03582	0.000131974	12.8875	3.87951	7961	2377	1195	18911	TSPAN15,KIAA1522,LAMA5,KRT8,CELSR1,TUFT1,SHTN1,RIPK4,TMEM184A,KRT18,HSPA1A,HSPA1B,DDX27,WWC1,PPL,MAP3K13,DDR1,CLDN4,FAM241B,ADGRG1,MAL2,TOM1L1,TLCD1,PLPP2,PIP4K2C,FAM83H,IGSF3,PKP3,CHMP4C,PLEKHG3,RAB5IF,RASEF,CCNJL,ELF3,MYO5B,EEF1A2,EPCAM,ARHGEF16,GRB7,F11R,PTPRF,PATJ,TNFRSF21,KRT15,TSKU,ARHGAP39,CYB561,TSPAN6,LAPTM4B,ANKEF1,TFAP2C,SLC39A1,ITGB4,CDS1,LLGL2,KIAA1671,SCNN1A,MAP7,VWA1,IQANK1,TSPAN13…
GO:CC	Golgi apparatus	GO:0005794	0.000136456	12.8393	3.86501	1578	4249	459	18911	BAIAP2,TOM1L1,PDGFB,ELF3,SDC4,PAK4,WNT7B,B3GNT5,VAPB,PMEPA1,AGRN,YIPF6,ST6GALNAC2,PERP,TMEM132A,CDH1,TMEM30B,AP1M2,CTTN,BCAP31,SDC1,SLPI,TGFA,RAP1GAP,CAPN2,MUC1,KLF5,KIFC3,B3GNT3,ID1,GCNT2,SYS1,GOLM1,PCSK1N,EGFR,HID1,SYT17,LTBR,OBSL1,FHDC1,GOLT1A,MTUS1,ATP9A,FAM174B,F2RL1,LFNG,EMP2,GALNT3,MYO6,CLU,RAC1,SLC2A1,RHOBTB3,ACSL3,DPY30,ZDHHC9,PRKAA2,B3GALNT1,APP,PTHLH,GAS8,DHCR24,YES1,CREG2,FOLR1,PLSCR1…
REAC	MET promotes cell motility	REAC:R-HSA-8875878	0.000141299	12.789	3.84986	40	584	10	18911	LAMA5,MET,LAMB3,LAMC2,ITGA3,LAMA3,LAMB1,RAC1,TNS3,ITGA2
GO:BP	regulation of cellular component biogenesis	GO:0044087	0.000144091	12.7607	3.84136	964	535	59	18911	BAIAP2L1,HSPA1A,HSPA1B,BAIAP2,PIP4K2C,CHMP4C,SDC4,F11R,MET,PMEPA1,AGRN,EFNA5,TACSTD2,CLDN1,CTTN,SDC1,FNBP1L,SSH3,TJP1,SIX4,RAP1GAP,WASL,KLF5,SPIRE2,ID1,DLG5,PLK2,NCKAP1,PLEK2,SPTBN2,STX1A,CLDN3,OCLN,PPFIA1,EPS8L1,COBL,LIMCH1,PXN,EPHA2,ARPC1A,DUSP3,ARHGEF5,F2RL1,CHMP4B,CDC42EP4,RHOD,CLU,SVIL,RAC1,CARMIL1,CAMSAP3,FAM110C,PHLDB2,PRKCZ,PRKAA2,APP,CRB3,ECT2,S100A10
TF	Factor: SALL2; motif: GGGTGGG; match class: 1	TF:M04595_1	0.000152353	12.6803	3.81715	7036	3084	1348	18911	TSPAN15,LAMA5,KRT8,CELSR1,SHTN1,KRT80,EFNA1,RHPN2,SOX13,HSPA1A,PPL,DDR1,CLDN4,ADGRG1,PLPP2,PIP4K2C,FAM83H,P2RY2,BCAM,PKP3,PDGFB,ELF3,EEF1A2,ARHGEF16,NHLRC1,EPB41L1,GRB7,WFDC2,PTPRF,WNT7B,KRT15,CYB561,TFAP2C,ITGB4,KIAA1671,SCNN1A,ETNK2,IQANK1,VAPB,TSPAN13,PCDH1,MAP3K9,ESRP1,ACOT4,AGRN,EFNA5,SFN,ST6GALNAC2,TMEM132A,CEP170B,HES1,CDH1,TMEM54,LAMB3,S100A2,CLDN9,BCAP31,RTL8A,PRSS22,SDC1,SYT12,C6ORF141,…
TF	Factor: E2F-1:HES-7; motif: GGCRCGTGSYNNWNGGCGCSM; match class: 1	TF:M08525_1	0.000156998	12.637	3.80411	14547	1189	1034	18911	TSPAN15,KIAA1522,CTSV,LAMA5,KRT8,CELSR1,TUFT1,SHTN1,RIPK4,TMEM184A,KRT18,BAIAP2L1,EFNA1,RHPN2,SOX13,HSPA1A,MLF1,HSPA1B,DDX27,WWC1,PPL,MAP3K13,CLDN4,FAM241B,BAIAP2,ADGRG1,MAL2,TOM1L1,TLCD1,PLPP2,PIP4K2C,FAM83H,IGSF3,P2RY2,BCAM,PKP3,PLEKHG3,RAB5IF,PDGFB,RASEF,CCNJL,SPR,ELF3,MYO5B,EEF1A2,EPCAM,SDC4,ARHGEF16,NHLRC1,EPB41L1,PAK4,GRB7,F11R,WFDC2,PTPRF,PATJ,TNFRSF21,WNT7B,AIF1L,MYH14,ARHGAP39,CYB561,PIG…
GO:BP	axon guidance	GO:0007411	0.0001591	12.6178	3.79833	282	3558	91	18911	LAMA5,EFNA1,GRB7,EFNA5,RAP1GAP,LAMC2,YTHDF1,SEMA4B,SPTBN2,LAMA3,RYK,IGSF9,SEMA3E,EPHA2,L1CAM,RAC1,APP,DAG1,ERBB2,OPHN1,LHX1,PLA2G10,PTK2,ARTN,PLXNA1,PIK3CB,NRCAM,EPHA1,NTN4,EFNB2,EPHB4,EPHB2,SRC,SEMA6B,WNT3,SEMA4C,VSTM2L,ENAH,PLXNB3,PLXNA2,NTN1,NFIB,SEMA3A,PLXNB1,GPC1,NECTIN1,LAMB2,HOXA2,ANOS1,MATN2,EPHB3,SEMA3C,BMP7,SEMA3B,SPTB,BMPR1B,EPHA4,GRB10,CYFIP1,TRIO,NRP1,VANGL2,EPHA10,WNT3A,PAX6,LGR6,SE…
GO:BP	embryonic organ development	GO:0048568	0.0001632	12.5811	3.78728	451	2332	96	18911	KRT8,CELSR1,EFNA1,PDGFB,WNT7B,SLC39A1,HES1,WNT9A,OVOL2,SIX4,PLS1,TFAP2A,KRT19,GRHL2,SPINT1,EGFR,COBL,NSDHL,EPHA2,SPINT2,ALDH1A3,MYO6,PBX1,SCRIB,TEAD3,FOLR1,PPP1R13L,TEAD4,LRIG3,TEAD1,ST14,ATP6V1B1,LHX1,PHLDA2,FGFR2,PLCD3,FOXC1,NR2F2,PCGF2,TGFB2,STK3,FZD6,YAP1,SIX1,SOX15,EPHB2,SLC9A3R1,HOXA3,EDN1,CEBPB,RNF207,MESP1,CXCL8,GRHL3,ZIC1,NTN1,HOXC11,CCDC40,CCDC103,MYO7A,PDGFA,HOXB7,FZD5,GJB5,MDFI,TEAD2,…
HP	Palmar hyperkeratosis	HP:0010765	0.000163431	12.579	3.78666	39	3792	23	18911	DSP,NECTIN4,PLEC,KRT17,KRT6A,FERMT1,KRT83,KRT16,KRT5,GJB2,NECTIN1,PKP1,RHBDF2,GJB6,SLURP1,HPGD,KRT6B,AAGAB,KRT9,COL7A1,KRT10,TGM1,CTSC
GO:BP	regulation of water loss via skin	GO:0033561	0.000163865	12.5752	3.78551	29	245	7	18911	CLDN4,MET,SFN,CLDN1,LSR,GRHL1,KDF1
HP	Reduced number of teeth	HP:0009804	0.000165838	12.5579	3.78032	276	269	18	18911	RIPK4,EEF1A2,ITGB4,PERP,CDH1,LAMB3,CLDN1,TGFA,TFAP2A,LAMC2,CTNND1,CDH3,GRHL2,LMNA,DSP,KDF1,IRF6,LAMA3
TF	Factor: Sp1; motif: NWRGCCMCGCCCMCN; match class: 1	TF:M12151_1	0.000169866	12.5233	3.76989	2459	2839	483	18911	TSPAN15,LAMA5,CELSR1,TUFT1,BAIAP2L1,WWC1,PPL,DDR1,BAIAP2,TLCD1,PIP4K2C,IGSF3,P2RY2,BCAM,EEF1A2,ARHGEF16,PAK4,GRB7,WFDC2,PTPRF,MYH14,CYB561,SLC39A1,CDS1,LLGL2,B3GNT5,VWA1,KLC3,TSPAN13,SOWAHC,C19ORF33,LYPD3,MAP3K9,AGRN,CEP170B,BCAP31,WNT9A,JAG2,TJP1,CMTM4,SHB,SLC2A4RG,GRHL1,PPP1R26,REPS2,PLEKHG6,INHBB,TMEM265,CLDN7,PKP2,CITED4,G6PD,TBC1D8,SPIRE2,SPINT1,SEMA4B,PANX2,ABHD11,ERBB3,NUDT14,SEZ6L2,STX1A,…
GO:BP	regulation of animal organ morphogenesis	GO:2000027	0.000170609	12.517	3.768	189	4927	83	18911	CELSR1,TACSTD2,SIX4,RYK,PSMA7,RAC1,PSMC4,PAX9,LHX1,PSMD4,CELSR2,WNT4,FZD6,LGR4,NTN4,SIX1,PSMD12,SMURF1,EDN1,SP6,MESP1,VANGL1,GRHL3,HOXC11,ARHGEF19,PDGFA,HOXB7,PSMA3,PSMD10,FZD5,SEM1,WNT10A,SAPCD2,SOX9,DKK1,PSMB3,PSMC2,PSMD2,ANKRD6,BMP7,SIX2,WNT7A,PSMD11,SPEF1,DAAM1,VANGL2,WNT3A,GATA5,JHY,PSMA2,ZNRF3,PSMB5,PSMC5,GATA3,PSMF1,NGFR,PSMB4,PSMC1,DMRT3,SPRY1,SHH,BMP2,FRS2,PKHD1,GPC3,DVL3,CELSR3,TIAM1,MK…
WP	Primary Focal Segmental Glomerulosclerosis FSGS	WP:WP2572	0.00017139	12.5104	3.76601	72	1707	21	18911	LAMA5,KRT8,ITGB4,AGRN,CLDN1,ITGA3,IRF6,LRP5,DAG1,PTK2,LMX1B,CTSL,ACTN4,COL4A5,INF2,JAG1,ITGAV,CD151,PLCE1,LAMB2,DKK1
TF	Factor: LKLF; motif: GGGGTGGKSN	TF:M07261	0.000174018	12.4885	3.75941	9324	1861	1081	18911	TSPAN15,KIAA1522,LAMA5,KRT8,CELSR1,TUFT1,SHTN1,TMEM184A,KRT80,KRT18,BAIAP2L1,EFNA1,RHPN2,SOX13,HSPA1A,HSPA1B,WWC1,PPL,DDR1,CLDN4,FAM241B,BAIAP2,ADGRG1,TLCD1,PLPP2,FAM83H,P2RY2,BCAM,PKP3,RAB5IF,PDGFB,RASEF,ELF3,MYO5B,EEF1A2,EPCAM,ARHGEF16,NHLRC1,GRB7,F11R,WFDC2,PTPRF,PATJ,TNFRSF21,WNT7B,KRT15,TSKU,ARHGAP39,CYB561,TSPAN6,ITGB4,LLGL2,KIAA1671,SCNN1A,VWA1,ETNK2,IQANK1,KLC3,VAPB,TSPAN13,PCDH1,CGN,MAP3…
HPA	gallbladder; glandular cells[‚â•Medium]	HPA:0220052	0.000174122	12.4876	3.75915	6301	1201	485	18911	TSPAN15,KIAA1522,KRT8,TUFT1,KRT18,BAIAP2L1,HSPA1A,HSPA1B,WWC1,PPL,DDR1,CLDN4,BAIAP2,TLCD1,PIP4K2C,FAM83H,CHMP4C,PLEKHG3,PDGFB,RASEF,CCNJL,ELF3,MYO5B,EPCAM,SDC4,ARHGEF16,EPB41L1,GRB7,F11R,PATJ,TNFRSF21,TSKU,MYH14,TSPAN6,ANKEF1,KIAA1671,SCNN1A,MAP7,VAPB,MET,SOWAHC,PCDH1,CGN,MAP3K9,ITGB6,ESRP1,ACOT4,KRT7,AGRN,EFNA5,CPVL,CEP170B,CDH1,DSG2,EPN3,CLDN1,CTTN,BCAP31,RCE1,SDC1,FNBP1L,SLC25A13,CARD10,JAG2,T…
HPA	esophagus; squamous epithelial cells[‚â•Medium]	HPA:0190222	0.000174404	12.4853	3.75844	4810	667	228	18911	KIAA1522,TUFT1,RIPK4,BAIAP2L1,HSPA1A,HSPA1B,WWC1,PPL,DDR1,CLDN4,FAM241B,BAIAP2,PIP4K2C,FAM83H,PKP3,PDGFB,RASEF,PRXL2A,MYO5B,SDC4,ARHGEF16,EPB41L1,GRB7,F11R,TNFRSF21,KRT15,TSPAN6,ANKEF1,KIAA1671,MAP7,KLC3,VAPB,MET,SOWAHC,PCDH1,LYPD3,CGN,ESRP1,KRT7,SFN,CEP170B,TACSTD2,CDH1,S100A2,CTTN,BCAP31,RCE1,SDC1,FNBP1L,CARD10,TACC2,PTPN3,CDC42BPG,PRPF6,TGFA,MPZL2,STON2,DSC2,STAU1,GRHL1,RAP1GAP,KRT4,TFAP2A,WAS…
GO:BP	epithelial tube morphogenesis	GO:0060562	0.000186489	12.3886	3.72935	333	3920	112	18911	LAMA5,CELSR1,DDR1,SDC4,FOXA1,MET,ESRP2,HES1,TACSTD2,OVOL2,SIX4,GRHL2,DLG5,SPINT1,LRP5,COBL,SEMA3E,EPHA2,SPINT2,PBX1,SCRIB,FOLR1,DAG1,ST14,LHX1,MDK,AREG,FGFR2,WNT4,TGFB2,STK3,FZD6,LGR4,GREB1L,YAP1,SIX1,EFNB2,SRC,CTSH,SEMA4C,EDN1,RNF207,IRX2,MESP1,NPNT,GRHL3,NTN1,CCDC40,CCDC103,SALL4,HOXB7,ADAMTS16,TEAD2,SOX9,DLL1,SHROOM3,BMP7,SIX2,LRP2,HOXD11,EPHA4,RHOB,CTNNBIP1,NRP1,GATA4,FMN1,VANGL2,WNT6,RARG,WN…
GO:BP	epithelial cell-cell adhesion	GO:0090136	0.000186695	12.387	3.72887	16	498	7	18911	KIFC3,DSP,JUP,PLEKHA7,CTNNA1,CAMSAP3,ITGB5
KEGG	Cell adhesion molecules	KEGG:04514	0.000187614	12.3799	3.72674	128	375	14	18911	CLDN4,SDC4,F11R,PTPRF,CDH1,CLDN9,CLDN1,SDC1,CLDN7,CDH3,CLDN3,OCLN,PVR,L1CAM
GO:BP	neuron projection guidance	GO:0097485	0.000190796	12.3557	3.71943	283	3558	91	18911	LAMA5,EFNA1,GRB7,EFNA5,RAP1GAP,LAMC2,YTHDF1,SEMA4B,SPTBN2,LAMA3,RYK,IGSF9,SEMA3E,EPHA2,L1CAM,RAC1,APP,DAG1,ERBB2,OPHN1,LHX1,PLA2G10,PTK2,ARTN,PLXNA1,PIK3CB,NRCAM,EPHA1,NTN4,EFNB2,EPHB4,EPHB2,SRC,SEMA6B,WNT3,SEMA4C,VSTM2L,ENAH,PLXNB3,PLXNA2,NTN1,NFIB,SEMA3A,PLXNB1,GPC1,NECTIN1,LAMB2,HOXA2,ANOS1,MATN2,EPHB3,SEMA3C,BMP7,SEMA3B,SPTB,BMPR1B,EPHA4,GRB10,CYFIP1,TRIO,NRP1,VANGL2,EPHA10,WNT3A,PAX6,LGR6,SE…
GO:BP	regulation of epidermis development	GO:0045682	0.000193513	12.3353	3.71329	67	277	10	18911	CTSV,ESRP1,SFN,HES1,OVOL2,GRHL1,GRHL2,KDF1,TRIM16,ERRFI1
TF	Factor: AP-2gamma; motif: NSCCYNNRGSN; match class: 1	TF:M11482_1	0.000199344	12.2925	3.7004	1984	3161	438	18911	KIAA1522,CELSR1,RHPN2,PPL,ADGRG1,IGSF3,BCAM,EPCAM,PATJ,WNT7B,KRT15,LLGL2,FOXA1,KLC3,SOWAHC,AGRN,EFNA5,CEP170B,BCAP31,CARD10,WNT9A,C6ORF141,JAG2,PTPN3,GPRC5C,PRPF6,TGFA,CMTM4,SHB,SLC2A4RG,GRHL1,PPP1R26,REPS2,INHBB,CITED4,TBC1D8,ADRM1,SPIRE2,PRRG4,UPP1,DLG5,NANOS1,PLK2,PARD6B,CACNG4,PANX2,WFDC3,RASSF10,GIPC1,LAMA3,PLEKHA7,BCAR1,DNTTIP1,HID1,IL13RA1,EPPK1,HMGB3,PARD3,ANXA8L1,LRRC1,MICALL2,LTBR,ARHGA…
TF	Factor: SNA; motif: GCCACCTGNCNGYN	TF:M03566	0.000200645	12.2831	3.69757	2147	3361	503	18911	KIAA1522,RIPK4,WWC1,PPL,DDR1,ADGRG1,BCAM,PDGFB,MYO5B,EEF1A2,GRB7,F11R,ANKEF1,CDS1,SCNN1A,MAP7,ETNK2,KLC3,MAP3K9,ESRP2,ESRP1,ACOT4,AGRN,CPVL,CEP170B,CDH1,AP1M2,LAMB3,BCAP31,SLC25A13,C6ORF141,SLPI,TACC2,RGL3,STAU1,PPP1R26,EPHX1,PLS1,CLDN7,PKP2,TBC1D8,MB,GPAT3,YTHDF1,PRRG4,DLG5,ITGA3,PANX2,WFDC3,MANBAL,MISP,TPD52L1,SPTBN2,NUDT14,EVPL,POR,SLC6A11,TMEM270,TC2N,CLDN3,C1ORF115,BCAR1,DNTTIP1,NECTIN4,C1OR…
REAC	Apoptotic cleavage of cell adhesion proteins	REAC:R-HSA-351906	0.000201077	12.28	3.69664	11	295	5	18911	CDH1,DSG2,TJP1,DSP,OCLN
GO:BP	cell population proliferation	GO:0008283	0.000206514	12.2415	3.68505	1940	1369	213	18911	LAMA5,HSPA1A,HSPA1B,DDR1,ADGRG1,PDGFB,EPCAM,SDC4,TNFRSF21,WNT7B,TFAP2C,ESRP2,SFN,HES1,TACSTD2,CLDN1,C1ORF56,WNT9A,JAG2,TACC2,OVOL2,STYK1,CLMN,TGFA,TJP1,MARVELD3,SIX4,RAP1GAP,KRT4,TFAP2A,EGLN3,LAMC2,KLF5,TBC1D8,CDH3,GRHL2,ID1,DLG5,LMNA,GCNT2,SPINT1,JUP,KDF1,RASSF10,IRF6,ERBB3,FRK,ERRFI1,POR,CLDN3,EGFR,LRP5,RYK,IL13RA1,OSGIN1,EPPK1,FAM83D,LTBP3,PTK6,EPHA2,PTPRK,ROMO1,INHA,STX3,SPINT2,RAB25,CXADR,PT…
HPA	testis; Leydig cells[‚â•Low]	HPA:0570731	0.000220345	12.1479	3.6569	7095	2015	868	18911	TSPAN15,KIAA1522,TUFT1,RIPK4,BAIAP2L1,DDR1,BAIAP2,TLCD1,PIP4K2C,FAM83H,PKP3,CHMP4C,PLEKHG3,PDGFB,RASEF,PRXL2A,MYO5B,SDC4,ARHGEF16,EPB41L1,F11R,WFDC2,PATJ,TNFRSF21,TSKU,CYB561,TSPAN6,ANKEF1,ITGB4,CDS1,KIAA1671,SCNN1A,ETNK2,VAPB,MET,SOWAHC,PCDH1,ESRP1,ACOT4,AGRN,EFNA5,CPVL,TMEM132A,LAMB3,EPN3,CLDN1,CTTN,BCAP31,RCE1,FNBP1L,SLC25A13,CARD10,C1ORF56,JAG2,TACC2,ABCC3,CLMN,PTPN3,SSH3,GPRC5C,TSPAN1,CDC42B…
HPA	liver	HPA:0290000	0.000223437	12.1278	3.65085	6002	2014	747	18911	TSPAN15,KIAA1522,KRT8,TUFT1,KRT18,BAIAP2L1,HSPA1A,HSPA1B,WWC1,PPL,DDR1,BAIAP2,TLCD1,FAM83H,CHMP4C,PLEKHG3,PDGFB,PRXL2A,MYO5B,SDC4,ARHGEF16,EPB41L1,GRB7,F11R,PATJ,TNFRSF21,TSKU,MYH14,TSPAN6,ANKEF1,ITGB4,KIAA1671,SCNN1A,MAP7,PON3,ETNK2,VAPB,MET,SOWAHC,PCDH1,MAP3K9,ACOT4,KRT7,AGRN,EFNA5,TMEM132A,CEP170B,CDH1,LAMB3,DSG2,CLDN1,CTTN,BCAP31,RCE1,SDC1,FNBP1L,SLC25A13,CARD10,JAG2,TACC2,CLMN,PTPN3,SSH3,LSR…
TF	Factor: BTEB3; motif: BNRNGGGAGGNGT; match class: 1	TF:M01865_1	0.000227294	12.1032	3.64341	4050	3471	904	18911	KIAA1522,CTSV,LAMA5,TMEM184A,BAIAP2L1,RHPN2,MLF1,HSPA1B,FAM241B,BAIAP2,ADGRG1,TLCD1,PLPP2,IGSF3,BCAM,PKP3,CCNJL,MYO5B,EEF1A2,EPCAM,ARHGEF16,F11R,WFDC2,AIF1L,CDS1,LLGL2,FOXA1,KIAA1671,SCNN1A,ETNK2,PCDH1,C19ORF33,ESRP1,KRT7,AGRN,KIAA0895,LAMB3,S100A2,DSG2,BCAP31,RTL8A,PRSS22,SDC1,FNBP1L,SLC25A13,WNT9A,OVOL2,ATP1B1,LSR,PRPF6,TJP1,CMTM4,SHB,SIX4,STAU1,PPP1R26,RAP1GAP,CLDN7,MPP3,ADRM1,CDH3,SPIRE2,KRT1…
TF	Factor: Sp3; motif: ASMCTTGGGSRGGG	TF:M00665	0.000230357	12.0838	3.6376	7336	3086	1406	18911	TSPAN15,KIAA1522,CTSV,CELSR1,TMEM184A,KRT80,BAIAP2L1,SOX13,HSPA1A,HSPA1B,DDX27,DDR1,FAM241B,BAIAP2,TOM1L1,TLCD1,PLPP2,PIP4K2C,FAM83H,IGSF3,P2RY2,PKP3,PLEKHG3,RAB5IF,RASEF,CCNJL,SPR,ELF3,MYO5B,EEF1A2,EPCAM,SDC4,ARHGEF16,GRB7,F11R,WFDC2,PTPRF,KRT15,MYH14,CYB561,TSPAN6,LAPTM4B,ANKEF1,CDS1,LLGL2,FOXA1,KIAA1671,B3GNT5,SCNN1A,VWA1,PON3,IQANK1,TSPAN13,MET,SOWAHC,PCDH1,C19ORF33,MAP3K9,PMEPA1,ESRP2,ESRP1,…
TF	Factor: AP-1; motif: NNTGACTCANN	TF:M00174	0.000234588	12.0576	3.62969	1816	1176	181	18911	TSPAN15,KRT8,KRT18,RHPN2,MAP3K13,MAL2,PIP4K2C,FAM83H,CCNJL,EEF1A2,EPCAM,KRT15,MYH14,SLC39A1,FOXA1,MET,C19ORF33,AGRN,TRIM16L,PERP,HES1,S100A2,CLDN9,PRSS22,ABCC3,CDC42BPG,MARVELD3,STON2,MAB21L4,TMEM265,LAMC2,KIFC3,CXCL16,PIR,GPAT3,UPP1,GPR87,GCNT2,SPINT1,SEMA4B,MISP,TMEM51,PROM2,DUSP23,CLDN3,HID1,SCEL,NECTIN4,STAP2,OSGIN1,C1ORF116,EPPK1,FGF12,ALDH3A2,EPHA2,OSBPL2,SPINT2,SNCG,C11ORF80,ANXA3,GSDMC,EI…
REAC	DCC mediated attractive signaling	REAC:R-HSA-418885	0.000234941	12.0554	3.62904	13	2594	10	18911	WASL,RAC1,PTK2,SRC,ABLIM1,NTN1,ABLIM3,DOCK1,TRIO,ABLIM2
GO:MF	extracellular matrix binding	GO:0050840	0.000237139	12.042	3.625	55	2236	21	18911	ADGRG1,BCAM,LYPD3,AGRN,ITGA3,ADGRG6,DAG1,ITGA2,TINAGL1,OLFML2A,LYPD5,NTN4,LGALS3,ACHE,ITGAV,GPC1,SMOC1,ITGA6,CYR61,TGFBI,ADAM9
TF	Factor: PLAG1; motif: GRGGCNNHNNNRRGGG	TF:M01778	0.000250375	11.9636	3.60141	2638	3642	641	18911	KIAA1522,TMEM184A,WWC1,PPL,BAIAP2,IGSF3,PDGFB,RASEF,CCNJL,EEF1A2,EPB41L1,PTPRF,KRT15,CYB561,LLGL2,FOXA1,SCNN1A,VWA1,ETNK2,VAPB,PCDH1,CGN,KRT7,AGRN,TMEM54,S100A2,BCAP31,CARD10,ATP1B1,ABCC3,CLMN,PTPN3,SSH3,CDC42BPG,TGFA,TJP1,STAU1,SLC2A4RG,GRHL1,PPP1R26,RAP1GAP,REPS2,PLEKHG6,CLDN7,C4ORF19,PKP2,ADRM1,SPIRE2,PIR,YTHDF1,PRRG4,UPP1,GPRC5A,PLK2,CUEDC1,PARD6B,PANX2,SPTBN2,KIF21A,PLEKHA7,SEZ6L2,MCOLN3,PCS…
TF	Factor: E2F-6; motif: NGGGCGGGARRNN	TF:M09895	0.000251775	11.9556	3.59899	7446	1677	800	18911	TSPAN15,KIAA1522,CTSV,LAMA5,SHTN1,RIPK4,KRT80,BAIAP2L1,RHPN2,DDX27,WWC1,PPL,DDR1,FAM241B,BAIAP2,ADGRG1,MAL2,TLCD1,PLPP2,PIP4K2C,FAM83H,P2RY2,PKP3,CHMP4C,PLEKHG3,RAB5IF,PDGFB,RASEF,SPR,ELF3,MYO5B,EEF1A2,SDC4,ARHGEF16,EPB41L1,GRB7,PTPRF,AIF1L,MYH14,TSPAN6,ANKEF1,TFAP2C,SLC39A1,CDS1,LLGL2,FOXA1,B3GNT5,MAP7,ETNK2,IQANK1,KLC3,VAPB,MET,SOWAHC,PCDH1,C19ORF33,MAP3K9,ESRP2,ESRP1,STARD10,ACOT4,KRT7,AGRN,EF…
GO:BP	positive regulation of catalytic activity	GO:0043085	0.000259445	11.9123	3.58596	1454	2374	253	18911	EFNA1,HSPA1A,MAP3K13,DDR1,CLDN4,TOM1L1,PDGFB,EEF1A2,SDC4,ARHGEF16,PAK4,F11R,WNT7B,ARHGAP39,LLGL2,MET,MAP3K9,AGRN,EFNA5,PERP,BCAP31,PRSS22,CARD10,ATP1B1,GPRC5C,TGFA,RGL3,RAP1GAP,PLEKHG6,EGLN3,TBC1D8,ADRM1,CDH3,GRHL2,GPRC5A,TPD52L1,ERBB3,ERRFI1,RASAL2,POR,CLDN3,EGFR,RYK,CTSD,PFKFB2,CARD14,EPHA2,GRTP1,ARHGAP8,INAVA,ARHGAP29,MAP3K21,AGAP1,ARHGEF5,F2RL1,EMP2,ASPH,CLU,BTC,CD24,SCRIB,PRKCZ,APP,SRCIN1,S1…
GO:MF	calcium ion binding	GO:0005509	0.000260885	11.9043	3.58355	657	3938	205	18911	CELSR1,RASEF,AIF1L,ANKEF1,PCDH1,AGRN,CDH1,S100A2,DSG2,SYT12,SLC25A13,JAG2,DSC2,CAPN2,PLS1,REPS2,CDH3,PRRG4,SYT7,SYT17,LTBP3,ANXA8L1,VWDE,ANXA3,ANXA9,ANXA8,GALNT3,ASPH,ADGRV1,PRRG2,DST,S100A14,PCLO,S100A9,TPD52,S100A10,PKD1L2,PLSCR1,PDCD6,DAG1,CABYR,PLS3,S100A16,CETN2,F12,NOL3,RYR1,DLK2,TCHH,FKBP9,GPD2,PLA2G10,GCA,CBLC,KCNIP3,SYT8,CELSR2,S100A11,ANXA2,PITPNM3,S100A13,PROC,ACER3,NECAB3,BAIAP3,FSTL4…
HP	Nail dystrophy	HP:0008404	0.000263914	11.8876	3.57854	110	1813	30	18911	ITGB4,LAMB3,LAMC2,GRHL2,LMNA,DSP,JUP,KDF1,ITGA3,LAMA3,PLEC,DST,HOXC13,KRT86,KRT17,KRT6A,IL36RN,KRT83,KRT81,KRT16,COL17A1,KRT5,GJB2,CD151,NECTIN1,PKP1,WNT10A,ZMPSTE24,AP1S3,ITGA6
GO:CC	cell-substrate junction	GO:0030055	0.000269276	11.8586	3.5698	425	637	40	18911	HSPA1A,HSPA1B,SDC4,PAK4,GRB7,AIF1L,ITGB4,ITGB6,CTTN,ZNF185,CAPN2,NCKAP1,JUP,ITGA3,MISP,BCAR1,EGFR,PPFIA1,EPPK1,PLEC,PXN,EPHA2,PVR,L1CAM,SVIL,RAC1,DST,TNS3,CTNNA1,NECTIN2,ITGB5,PHLDB2,YES1,DAG1,ITGA2,SLC9A3R2,PTPN12,MARCKS,CAV2,RDX
TF	Factor: GCMa; motif: RTGCGGGTN; match class: 1	TF:M11595_1	0.000272691	11.8404	3.56433	5513	2419	863	18911	KRT8,CELSR1,RIPK4,TMEM184A,KRT80,EFNA1,HSPA1A,HSPA1B,PPL,DDR1,BAIAP2,TLCD1,PLPP2,PIP4K2C,FAM83H,BCAM,PKP3,PDGFB,MYO5B,EEF1A2,EPCAM,SDC4,PAK4,WFDC2,WNT7B,TSKU,ARHGAP39,CYB561,PIGT,TFAP2C,SLC39A1,ITGB4,CDS1,LLGL2,KIAA1671,B3GNT5,PON3,ETNK2,IQANK1,KLC3,PCDH1,C19ORF33,CGN,MAP3K9,ESRP2,KRT7,AGRN,TRIM16L,EFNA5,SFN,KIAA0895,ST6GALNAC2,TMEM132A,CEP170B,HES1,TMEM54,LAMB3,DSG2,TRIM47,BCAP31,RTL8A,RCE1,SDC1…
TF	Factor: ctcf; motif: YGGCCACCAGRKGGCRSYN	TF:M09890	0.000275005	11.8283	3.56066	8120	1070	571	18911	TSPAN15,KIAA1522,LAMA5,KRT8,CELSR1,TMEM184A,KRT18,BAIAP2L1,SOX13,WWC1,PPL,FAM241B,BAIAP2,ADGRG1,TOM1L1,TLCD1,PLPP2,IGSF3,P2RY2,BCAM,PKP3,PLEKHG3,RAB5IF,PDGFB,RASEF,CCNJL,SPR,ELF3,MYO5B,ARHGEF16,GRB7,F11R,WFDC2,TNFRSF21,KRT15,TSKU,AIF1L,CYB561,TSPAN6,LAPTM4B,SLC39A1,ITGB4,LLGL2,FOXA1,KIAA1671,B3GNT5,SCNN1A,MAP7,VWA1,ETNK2,VAPB,MET,SOWAHC,PCDH1,CGN,MAP3K9,ESRP2,ESRP1,STARD10,ACOT4,KRT7,AGRN,TRIM16L…
GO:BP	skin epidermis development	GO:0098773	0.000276461	11.8206	3.55837	93	1707	26	18911	LAMA5,CELSR1,CDH3,KDF1,EGFR,NSDHL,HOXC13,KRT17,PLA2G10,FGFR2,TMEM79,TGFB2,FERMT1,FZD6,LGR4,SOX21,SPINK5,HPSE,FOXQ1,GAL,PDGFA,WNT10A,SOX9,ZMPSTE24,DLL1,DKK1
TF	Factor: E2F-1; motif: TTTGGCGCCAAA	TF:M04516	0.000281523	11.7945	3.55049	10891	1862	1235	18911	KIAA1522,CTSV,LAMA5,KRT8,CELSR1,TUFT1,SHTN1,RIPK4,TMEM184A,KRT18,EFNA1,RHPN2,HSPA1A,DDX27,WWC1,PPL,FAM241B,BAIAP2,MAL2,TOM1L1,TLCD1,PLPP2,PIP4K2C,FAM83H,IGSF3,P2RY2,PKP3,CHMP4C,PLEKHG3,RAB5IF,PDGFB,RASEF,CCNJL,SPR,MYO5B,EEF1A2,EPCAM,SDC4,ARHGEF16,PAK4,F11R,WFDC2,PTPRF,PATJ,TNFRSF21,WNT7B,AIF1L,MYH14,CYB561,TSPAN6,LAPTM4B,ANKEF1,SLC39A1,ITGB4,CDS1,LLGL2,FOXA1,B3GNT5,SCNN1A,MAP7,PON3,IQANK1,SOWAHC,…
GO:BP	microtubule bundle formation	GO:0001578	0.000283053	11.7866	3.54813	106	4593	51	18911	GAS8,SPAG1,DNAH5,SPAG16,TTC12,MAP2,CFAP206,FAM187A,TOGARAM1,CCDC40,CCDC103,GAS2L1,DNAAF5,RP1,CLIP1,FOXJ1,TPPP3,SPAG17,TPPP,MAPRE1,SPEF1,HYDIN,JHY,CFAP43,FSIP2,CCDC151,CFAP65,DNAL1,CC2D2A,CFAP69,DNAAF3,TTC26,RSPH1,NEURL1,KIF20A,DNAI1,DNAH17,LRRC49,DNAAF4,DNAJB13,PRC1,SPEF2,CAPN6,DRC1,NUMA1,CFAP74,LRRC6,RP1L1,TEKT2,CFAP97D1,MTCL1
TF	Factor: AP-2alpha; motif: NSCCNCRGGSN; match class: 1	TF:M07348_1	0.000293128	11.7362	3.53294	2840	2863	551	18911	KIAA1522,LAMA5,KRT8,CELSR1,TMEM184A,KRT18,RHPN2,BAIAP2,IGSF3,PKP3,CCNJL,EPCAM,SDC4,ARHGEF16,PATJ,KRT15,MYH14,LLGL2,TSPAN13,MET,SOWAHC,EFNA5,KIAA0895,CEP170B,TMEM30B,TMEM54,CTTN,BCAP31,RCE1,SLC25A13,CARD10,JAG2,TACC2,GET4,CLMN,SSH3,CDC42BPG,PRPF6,TJP1,CMTM4,SHB,SLC2A4RG,GRHL1,RAP1GAP,TFAP2A,INHBB,MUC1,CITED4,TBC1D8,SPIRE2,ID1,YTHDF1,NANOS1,LAD1,NCKAP1,SYT7,CUEDC1,CACNG4,PANX2,PLEK2,GOLM1,SPTBN2,LA…
GO:CC	endoplasmic reticulum membrane	GO:0005789	0.00029545	11.7248	3.52952	1074	4169	325	18911	PLPP2,PIGT,SLC39A1,CDS1,VAPB,TMEM132A,BCAP31,RCE1,TGFA,GRAMD2A,HM13,EPHX1,DPM1,GPAT3,SPTSSB,SEZ6L2,POR,EGFR,ALDH3A2,NSDHL,TMEM189,PTGES,PIGU,ASPH,RAC1,DST,CNIH4,CYP1A1,ACSL3,ZDHHC9,ELOVL7,DHCR24,FOLR1,PDCD6,ARHGAP32,GPR37,RPN2,PTGFRN,ERGIC3,FA2H,LRRC8E,CTAGE4,PSEN2,RYR1,DHCR7,SDR16C5,PGRMC1,MYORG,SLC35B1,ATP6AP1,AREG,CTAGE8,LPIN3,HACD2,TMX2,DHRS3,SPTSSA,YIF1A,ERMP1,HSD11B2,RPN1,ALG3,FITM2,ORMDL2,…
MIRNA	hsa-miR-873-5p	MIRNA:hsa-miR-873-5p	0.000296357	11.7204	3.52818	260	210	15	18911	EFNA1,DDR1,SDC4,WNT7B,YIPF6,PERP,S100A2,TACC2,ZNF185,CMTM4,TFAP2A,EGLN3,WASL,MARVELD2,CTNND1
HP	Hypoplasia of dental enamel	HP:0006297	0.00030002	11.7027	3.52285	63	340	10	18911	ITGB4,ITGB6,LAMB3,CLDN1,LAMC2,GRHL2,LAMA3,NECTIN4,PLEC,ALDH3A2
GO:BP	regulation of cell motility	GO:2000145	0.000300037	11.7026	3.52282	956	518	60	18911	LAMA5,SHTN1,EFNA1,CLDN4,ADGRG1,FAM83H,PDGFB,EPCAM,SDC4,GRB7,MET,TACSTD2,CDH1,CLDN1,CARD10,TJP1,MARVELD3,WASL,LAMC2,CXCL16,DLG5,LMNA,PLK2,GCNT2,SEMA4B,JUP,PARD6B,ITGA3,ERBB3,LAMA3,CLDN3,BCAR1,EGFR,OSGIN1,EPPK1,SEMA3E,LIMCH1,EPHA2,PTPRK,SPINT2,RAB25,DUSP3,MTUS1,F2RL1,ANXA3,LAMB1,EMP2,ADAM15,RHOD,SMIM22,RAC1,BTC,CTNNA1,CARMIL1,CAMSAP3,FAM110C,S100A14,PHLDB2,APP,SRCIN1
GO:BP	lipid metabolic process	GO:0006629	0.00032228	11.5994	3.49177	1404	4770	451	18911	PLPP2,PIP4K2C,PDGFB,EEF1A2,SDC4,TNFRSF21,PIGT,CDS1,B3GNT5,PON3,ETNK2,VAPB,STARD10,ACOT4,AGRN,SDC1,LSR,GRHL1,EPHX1,CAPN2,DPM1,G6PD,GPAT3,LIPH,ACP6,GOLM1,SPTSSB,POR,EHHADH,EGFR,LRP5,PON2,PC,ALDH3A2,NSDHL,OSBPL2,SLC44A3,TMEM189,PTGES,ALDH1A3,EIF6,PIGU,DAGLA,CLU,PBX1,CYP1A1,ACSL3,CLCN2,ELOVL7,ALDH3B2,PRKAA2,B3GALNT1,ME1,APP,DHCR24,PLSCR1,SULT2B1,PEX11A,CHKA,FA2H,PLBD1,CRABP2,DHCR7,B4GALT5,SDR16C5,ATP…
HP	Hypoplasia of teeth	HP:0000685	0.000322842	11.5969	3.49101	80	340	11	18911	ITGB4,ITGB6,LAMB3,CLDN1,LAMC2,GRHL2,LMNA,LAMA3,NECTIN4,PLEC,ALDH3A2
KEGG	Focal adhesion	KEGG:04510	0.000323194	11.5953	3.49054	200	1886	42	18911	LAMA5,PDGFB,PAK4,ITGB4,MET,ITGB6,LAMB3,CAPN2,LAMC2,ITGA3,LAMA3,BCAR1,EGFR,PXN,LAMB1,RAC1,ITGB5,ITGA2,ERBB2,CAV2,PAK6,PTK2,ITGB8,PIK3CB,COL4A6,SRC,ACTN4,ARHGAP5,COL4A5,JUN,ITGAV,VAV2,RAC3,PDGFA,LAMB2,CCND1,IGF1R,DOCK1,CAV1,ITGA6,CHAD,ACTN1
GO:CC	endoplasmic reticulum subcompartment	GO:0098827	0.000329006	11.5696	3.4828	1079	4169	326	18911	PLPP2,PIGT,SLC39A1,CDS1,VAPB,TMEM132A,BCAP31,RCE1,TGFA,GRAMD2A,HM13,EPHX1,DPM1,GPAT3,SPTSSB,SEZ6L2,POR,EGFR,ALDH3A2,NSDHL,TMEM189,PTGES,PIGU,ASPH,RAC1,DST,CNIH4,CYP1A1,ACSL3,ZDHHC9,ELOVL7,DHCR24,FOLR1,PDCD6,ARHGAP32,GPR37,RPN2,PTGFRN,ERGIC3,FA2H,LRRC8E,CTAGE4,PSEN2,RYR1,DHCR7,SDR16C5,PGRMC1,MYORG,SLC35B1,ATP6AP1,AREG,CTAGE8,LPIN3,HACD2,TMX2,DHRS3,SPTSSA,YIF1A,ERMP1,HSD11B2,RPN1,ALG3,FITM2,ORMDL2,…
KEGG	Regulation of actin cytoskeleton	KEGG:04810	0.000336425	11.5374	3.47311	217	1490	38	18911	BAIAP2,PIP4K2C,PDGFB,PAK4,MYH14,ITGB4,ITGB6,SSH3,WASL,NCKAP1,ITGA3,BCAR1,EGFR,PXN,ARPC1A,RAC1,ITGB5,ITGA2,RDX,PFN2,PAK6,PTK2,ITGB8,FGFR2,PIK3CB,PFN4,SRC,ACTN4,GNG12,IQGAP3,ENAH,ACTR3C,FGFR3,ITGAV,VAV2,FGFR4,RAC3,PDGFA
TF	Factor: Tcfap2e; motif: TGCCCYNNGGCN	TF:M11476	0.000345043	11.5009	3.46213	2210	2703	425	18911	KIAA1522,SHTN1,SOX13,HSPA1A,MAL2,FAM83H,P2RY2,PDGFB,RASEF,ELF3,MYO5B,EPB41L1,WNT7B,KRT15,ARHGAP39,PIGT,KIAA1671,MAP7,IQANK1,SOWAHC,PCDH1,S100A2,TRIM47,RCE1,SYT12,CARD10,C1ORF56,OVOL2,SSH3,CMTM4,SHB,HM13,KRT4,INHBB,MUC1,CDH3,NANOS1,LMNA,GPRC5A,PLK2,SYT7,KDF1,PLEK2,RASSF10,PLEKHA7,ERRFI1,PROM2,DUSP23,EVPL,MCOLN3,RASAL2,SLC6A11,OCLN,LRP5,PPFIA1,STAP2,EPPK1,BARX2,LTBP3,NDUFS6,DMRTA1,PTK6,ANKRD18A,MIC…
KEGG	Pathogenic Escherichia coli infection	KEGG:05130	0.000345882	11.4974	3.46107	196	295	14	18911	BAIAP2L1,CLDN4,BAIAP2,MYO5B,MYH14,CLDN9,CLDN1,CTTN,TJP1,WASL,CLDN7,NCKAP1,CLDN3,OCLN
GO:BP	regulation of actin filament organization	GO:0110053	0.000348879	11.485	3.45733	273	561	27	18911	BAIAP2L1,BAIAP2,SDC4,F11R,MET,TACSTD2,CTTN,SSH3,TJP1,WASL,SPIRE2,ID1,NCKAP1,SPTBN2,PPFIA1,LIMCH1,PXN,ARPC1A,ARHGEF5,F2RL1,CDC42EP4,SVIL,RAC1,CARMIL1,PHLDB2,S100A10,DSTN
GO:CC	lateral plasma membrane	GO:0016328	0.000384758	11.3438	3.41481	68	295	11	18911	CLDN4,EPCAM,TACSTD2,CDH1,DSG2,CLDN1,ATP1B1,JUP,ERBB3,CLDN3,OCLN
GO:BP	urogenital system development	GO:0001655	0.000401524	11.2822	3.39629	349	2348	78	18911	LAMA5,PDGFB,EPCAM,SDC4,WNT7B,FOXA1,HES1,TACSTD2,SDC1,SIX4,TFAP2A,DLG5,ITGA3,CD24,PBX1,WWTR1,LHX1,SERPINB5,FGFR2,FOXC1,WNT4,SRD5A1,TGFB2,OVOL1,CYP26B1,FADD,LGR4,RXRA,GREB1L,YAP1,SIX1,EFNB2,EPHB2,CTSH,IRX2,NPNT,FREM2,JAG1,HOXC11,WFS1,APH1A,PDGFA,HOXB7,ADAMTS16,PLCE1,PSAP,GLIS2,ANXA1,LAMB2,STRA6,SOX9,ZMPSTE24,DLL1,MMP9,FKBP4,FOXJ1,EPHB3,BMP7,TMED10,SIX2,LRP2,ASS1,HOXD11,SGPL1,EPHA4,FRAS1,CTNNBIP1,NR…
HP	Sparse or absent eyelashes	HP:0200102	0.000404282	11.2724	3.39332	78	2107	26	18911	RIPK4,CLDN1,CDH3,LIPH,LMNA,DSP,ITGA3,NECTIN4,HOXC13,CST6,HR,DLX4,SPINK5,SF3B4,DOLK,GJB2,DSC3,NECTIN1,EDARADD,PKP1,ZMPSTE24,WDR35,GJB6,KREMEN1,BANF1,FRAS1
TF	Factor: CP2; motif: NNNNCCAGNCNN; match class: 1	TF:M07602_1	0.000406544	11.2643	3.39089	4411	2490	725	18911	CTSV,CELSR1,TMEM184A,KRT80,BAIAP2L1,RHPN2,WWC1,DDR1,CLDN4,ADGRG1,TLCD1,PLPP2,PIP4K2C,PKP3,RASEF,ELF3,WFDC2,ARHGAP39,CYB561,PIGT,ANKEF1,SCNN1A,MAP7,PON3,KLC3,TSPAN13,PCDH1,C19ORF33,MAP3K9,PMEPA1,EFNA5,SFN,CPVL,TMEM132A,CEP170B,TACSTD2,TMEM54,LAMB3,S100A2,DSG2,TRIM47,EPN3,PRSS22,FNBP1L,SLC25A13,C1ORF56,WNT9A,TACC2,ZNF185,ATP1B1,ABCC3,LSR,GPRC5C,TGFA,MPZL2,HM13,SLC2A4RG,PPP1R26,RAP1GAP,MAB21L4,TMEM2…
HP	Palmar hyperhidrosis	HP:0006089	0.000421088	11.2136	3.37563	17	1653	10	18911	ITGB4,PERP,LAMB3,LAMC2,LAMA3,KRT17,KRT6A,KRT16,COL17A1,WNT10A
CORUM	DDR1-PRKCZ-WWC1 complex	CORUM:6294	0.00043407	11.1698	3.36244	3	24	2	18911	WWC1,DDR1
GO:BP	neuron projection morphogenesis	GO:0048812	0.000436471	11.1618	3.36004	674	1149	76	18911	LAMA5,SHTN1,EFNA1,MAP3K13,DDR1,BAIAP2,GRB7,WNT7B,TSKU,EFNA5,CTTN,RAP1GAP,WASL,LAMC2,AURKA,ID1,YTHDF1,NCKAP1,SEMA4B,PARD6B,SPTBN2,LAMA3,EGFR,RYK,SYT17,COBL,IGSF9,SEMA3E,PARD3,EPHA2,OBSL1,L1CAM,RAC1,PRKCZ,APP,SRCIN1,SHANK2,DAG1,LMTK2,ERBB2,NTF4,OPHN1,CRABP2,TMEM106B,B4GALT5,KLK8,ANK3,LHX1,SKIL,PLA2G10,PAK6,PTK2,FGFR2,ARTN,PLXNA1,NEDD4L,CELSR2,PIK3CB,KIAA0319,NRCAM,EPHA1,IMPACT,PPP1R9A,NTN4,FSTL4,EF…
TF	Factor: GEMIN3; motif: NCWGGRARRGRGNGNG; match class: 1	TF:M09727_1	0.000462209	11.0792	3.33516	3079	3250	664	18911	TSPAN15,SHTN1,TMEM184A,KRT80,RHPN2,HSPA1A,FAM241B,BAIAP2,TLCD1,PLPP2,P2RY2,BCAM,PRXL2A,EEF1A2,ARHGEF16,WFDC2,TNFRSF21,AIF1L,CYB561,KIAA1671,SCNN1A,MAP7,VWA1,ETNK2,KLC3,TSPAN13,PCDH1,PMEPA1,AGRN,EFNA5,ST6GALNAC2,TMEM132A,DSG2,CLDN9,PRSS22,CARD10,WNT9A,C6ORF141,ABCC3,GPRC5C,CDC42BPG,TJP1,RGL3,RAP1GAP,CAPN2,TFAP2A,INHBB,TMEM265,MPP3,PKP2,ADRM1,B3GNT3,SPIRE2,CUEDC1,CACNG4,PANX2,ABHD11,TMEM51,TPD52L1,…
GO:BP	regulation of cellular component organization	GO:0051128	0.000465814	11.068	3.33179	2358	680	134	18911	CELSR1,SHTN1,BAIAP2L1,EFNA1,HSPA1A,HSPA1B,MAP3K13,DDR1,BAIAP2,TOM1L1,PIP4K2C,CHMP4C,PDGFB,SDC4,PAK4,F11R,PTPRF,LAPTM4B,MET,PMEPA1,AGRN,EFNA5,SFN,TACSTD2,CLDN1,CTTN,SDC1,FNBP1L,SSH3,TGFA,TJP1,STON2,ZNF205,SIX4,RAP1GAP,CAPN2,PLS1,WASL,MUC1,KLF5,CXCL16,G6PD,AURKA,SPIRE2,ID1,DLG5,NANOS1,LMNA,PLK2,NCKAP1,SYT7,SEMA4B,ITGA3,PLEK2,SPTBN2,PROM2,STX1A,CLDN3,OCLN,BCAR1,EGFR,LRP5,PPFIA1,RYK,EPS8L1,OSGIN1,SYT…
HPA	testis	HPA:0570000	0.000468348	11.0601	3.32943	8177	2015	985	18911	TSPAN15,KIAA1522,TUFT1,SHTN1,RIPK4,BAIAP2L1,HSPA1A,HSPA1B,WWC1,DDR1,FAM241B,BAIAP2,TLCD1,PIP4K2C,FAM83H,PKP3,CHMP4C,PLEKHG3,PDGFB,RASEF,PRXL2A,CCNJL,MYO5B,SDC4,ARHGEF16,EPB41L1,GRB7,F11R,WFDC2,PATJ,TNFRSF21,TSKU,CYB561,TSPAN6,ANKEF1,ITGB4,CDS1,KIAA1671,SCNN1A,MAP7,ETNK2,KLC3,VAPB,MET,SOWAHC,PCDH1,CGN,MAP3K9,ESRP1,ACOT4,AGRN,EFNA5,CPVL,TMEM132A,CEP170B,LAMB3,DSG2,EPN3,CLDN1,CTTN,BCAP31,RCE1,SDC1,F…
GO:BP	viral entry into host cell	GO:0046718	0.000482682	11.0166	3.31634	137	3880	55	18911	HSPA1A,HSPA1B,F11R,ITGB6,CLDN9,CLDN1,EGFR,NECTIN4,EPHA2,PVR,CXADR,MID2,NECTIN2,ITGB5,PLSCR1,DAG1,ITGA2,ITCH,CAV2,SLC52A2,LY6E,EFNB2,CTSL,TMPRSS4,CD46,ITGAV,NECTIN1,VAMP8,TYRO3,CD55,SLC52A1,CAV1,PHB,WWP1,GSN,ACE2,PPIA,TMPRSS2,TFRC,LAMP1,SCARB2,TRIM31,DYNLT1,TRIML2,EFNB3,TRIM6,CLDN6,TPCN2,P4HB,LDLR,XPR1,NPC1,IFITM3,NCAM1,SERPINB3
CORUM	26S proteasome	CORUM:181	0.00048546	11.0084	3.31385	22	4866	16	18911	PSMA7,PSMC4,PSMD4,PSMA3,PSMB3,PSMC2,PSMA2,PSMB5,PSMC5,PSMB4,PSMC1,PSMB7,PSMC6,PSMC3,PSMB6,PSMA6
GO:BP	diterpenoid metabolic process	GO:0016101	0.000489479	10.9965	3.31027	108	4932	55	18911	SDC4,AGRN,SDC1,EGFR,ALDH3A2,ALDH1A3,CYP1A1,CRABP2,SDR16C5,DHRS3,RBP1,SRD5A1,CYP26B1,AKR1B10,RDH13,CYP2S1,AKR1B15,AKR1C3,CYP1B1,GPC1,CYP26C1,STRA6,LRAT,ABCA4,DGAT2,APOE,LRP2,AKR1C1,SDC3,ADH7,PNPLA4,CYP27C1,DHRS9,CYP26A1,BCO1,HSPG2,RDH12,CYP2C8,CRABP1,AKR1C4,LPL,PECR,ALDH1A2,RDH11,GPC3,CYP1A2,BCO2,RBP4,RHO,CYP3A5,PLB1,RDH16,CLPS,NAPEPLD,GPC5
GO:BP	hair cycle	GO:0042633	0.000497021	10.9744	3.30362	109	1707	29	18911	LAMA5,CELSR1,CDH3,EGFR,NSDHL,HOXC13,PPP1R13L,FA2H,MPZL3,KRT17,PLA2G10,FGFR2,TMEM79,TGFB2,FERMT1,FZD6,LGR4,KRT83,KRT16,SOX21,SPINK5,HPSE,FOXQ1,GAL,PDGFA,WNT10A,SOX9,ZMPSTE24,DKK1
GO:BP	molting cycle	GO:0042303	0.000497021	10.9744	3.30362	109	1707	29	18911	LAMA5,CELSR1,CDH3,EGFR,NSDHL,HOXC13,PPP1R13L,FA2H,MPZL3,KRT17,PLA2G10,FGFR2,TMEM79,TGFB2,FERMT1,FZD6,LGR4,KRT83,KRT16,SOX21,SPINK5,HPSE,FOXQ1,GAL,PDGFA,WNT10A,SOX9,ZMPSTE24,DKK1
GO:CC	focal adhesion	GO:0005925	0.000500683	10.9638	3.30044	417	637	39	18911	HSPA1A,HSPA1B,SDC4,PAK4,GRB7,AIF1L,ITGB4,ITGB6,CTTN,ZNF185,CAPN2,NCKAP1,JUP,ITGA3,MISP,BCAR1,EGFR,PPFIA1,PLEC,PXN,EPHA2,PVR,L1CAM,SVIL,RAC1,DST,TNS3,CTNNA1,NECTIN2,ITGB5,PHLDB2,YES1,DAG1,ITGA2,SLC9A3R2,PTPN12,MARCKS,CAV2,RDX
WP	Photodynamic therapy-induced NFE2L2 (NRF2) survival signaling	WP:WP3612	0.000508918	10.9403	3.29335	23	2221	12	18911	ABCC3,EPHX1,SRXN1,NQO1,GCLC,ABCC2,ABCG2,JUN,MAPK13,GCLM,ABCC6,FOS
HPA	cerebral cortex; neuropil[‚â•Low]	HPA:0100211	0.000512592	10.9299	3.29023	4855	2022	614	18911	TSPAN15,TUFT1,RIPK4,DDR1,FAM241B,BAIAP2,TLCD1,PIP4K2C,PKP3,CHMP4C,PLEKHG3,PDGFB,PRXL2A,EEF1A2,SDC4,ARHGEF16,EPB41L1,TNFRSF21,TSKU,AIF1L,ANKEF1,CDS1,KIAA1671,SCNN1A,MAP7,ETNK2,VAPB,MET,PCDH1,MAP3K9,ACOT4,EFNA5,TMEM132A,LAMB3,CTTN,BCAP31,RCE1,SYT12,FNBP1L,SLC25A13,CARD10,JAG2,TACC2,ATP1B1,CLMN,PTPN3,SSH3,TSPAN1,MPZL2,CMTM4,MIPOL1,STON2,STAU1,GRHL1,CAPN2,WASL,C4ORF19,PKP2,VMP1,KLF5,DPM1,G6PD,CTNND1,…
GO:BP	establishment or maintenance of cell polarity	GO:0007163	0.000520285	10.9084	3.28376	225	507	22	18911	SHTN1,WWC1,PATJ,WNT7B,LLGL2,MAP7,HES1,DLG5,LMNA,PARD6B,MISP,PARD3,SPINT2,RHOD,RAC1,CDC42BPB,DST,CTNNA1,CAMSAP3,RHOBTB3,SCRIB,PRKCZ
TF	Factor: KLF15; motif: RCCACGCCCCCC	TF:M12157	0.000532442	10.8751	3.27373	3486	2891	665	18911	TSPAN15,KRT8,CELSR1,KRT18,BAIAP2L1,PPL,BAIAP2,TLCD1,PLPP2,PIP4K2C,FAM83H,IGSF3,P2RY2,BCAM,PKP3,MYO5B,EEF1A2,ARHGEF16,EPB41L1,PAK4,GRB7,WFDC2,MYH14,PIGT,LAPTM4B,CDS1,LLGL2,B3GNT5,VWA1,IQANK1,KLC3,SOWAHC,C19ORF33,CGN,MAP3K9,ESRP2,ACOT4,AGRN,CEP170B,CTTN,BCAP31,SDC1,FNBP1L,SLC25A13,CARD10,JAG2,STYK1,GPRC5C,CDC42BPG,TJP1,CMTM4,SHB,SLC2A4RG,PPP1R26,RAP1GAP,REPS2,PLEKHG6,MAB21L4,INHBB,WASL,KLF5,MARVELD…
GO:BP	regulation of cell population proliferation	GO:0042127	0.000548224	10.8329	3.26104	1652	1369	186	18911	LAMA5,HSPA1A,HSPA1B,DDR1,ADGRG1,PDGFB,EPCAM,SDC4,TNFRSF21,TFAP2C,ESRP2,SFN,HES1,TACSTD2,CLDN1,C1ORF56,WNT9A,JAG2,OVOL2,STYK1,CLMN,TGFA,TJP1,MARVELD3,SIX4,RAP1GAP,KRT4,TFAP2A,EGLN3,LAMC2,KLF5,TBC1D8,CDH3,ID1,DLG5,LMNA,GCNT2,SPINT1,JUP,KDF1,RASSF10,IRF6,ERBB3,FRK,ERRFI1,POR,CLDN3,EGFR,LRP5,IL13RA1,OSGIN1,EPPK1,LTBP3,PTK6,PTPRK,ROMO1,INHA,STX3,SPINT2,RAB25,CXADR,PTGES,LAMB1,EMP2,ASPH,VTCN1,SMIM22,CL…
GO:BP	calcium-independent cell-cell adhesion via plasma membrane cell-adhesion molecules	GO:0016338	0.000554019	10.8178	3.25648	23	1095	10	18911	CLDN4,CLDN9,CLDN1,CLDN7,CLDN3,CLDN12,CLDN8,CLDN23,CLDN10,CX3CL1
TF	Factor: Kaiso; motif: GCMGGGRGCRGS	TF:M03876	0.000555246	10.8146	3.25551	13007	503	416	18911	TSPAN15,KIAA1522,CTSV,LAMA5,KRT8,CELSR1,SHTN1,RIPK4,TMEM184A,KRT80,KRT18,BAIAP2L1,EFNA1,RHPN2,SOX13,HSPA1A,WWC1,PPL,CLDN4,FAM241B,BAIAP2,ADGRG1,MAL2,TOM1L1,TLCD1,PLPP2,PIP4K2C,FAM83H,IGSF3,P2RY2,BCAM,PKP3,PLEKHG3,RAB5IF,PDGFB,RASEF,PRXL2A,CCNJL,SPR,ELF3,MYO5B,EEF1A2,EPCAM,SDC4,ARHGEF16,NHLRC1,EPB41L1,PAK4,GRB7,WFDC2,PTPRF,PATJ,TNFRSF21,WNT7B,KRT15,TSKU,AIF1L,MYH14,CYB561,LAPTM4B,ANKEF1,TFAP2C,SLC…
TF	Factor: ctcf; motif: CCNCNAGRKGGCRSTN; match class: 1	TF:M07249_1	0.00055613	10.8123	3.25482	2003	3602	492	18911	KIAA1522,CELSR1,BAIAP2L1,WWC1,PPL,FAM241B,PLPP2,RASEF,SPR,ELF3,ARHGEF16,WFDC2,TFAP2C,FOXA1,B3GNT5,VWA1,SOWAHC,ESRP1,STARD10,KRT7,TMEM132A,CEP170B,CLDN9,FNBP1L,JAG2,ATP1B1,ABCC3,PTPN3,LSR,GPRC5C,PRPF6,TGFA,TJP1,CMTM4,SHB,RGL3,SLC2A4RG,GRHL1,PPP1R26,PLS1,REPS2,PLEKHG6,G6PD,TBC1D8,SPIRE2,KRT19,DLG5,NANOS1,PLK2,MISP,TPD52L1,LAMA3,NUDT14,GPR39,STX1A,EVPL,POR,LRP5,HID1,IGSF9,BARX2,FAXC,DMKN,ROMO1,MAP3K…
HP	Increased level of propylene glycol in blood	HP:0410069	0.000559273	10.8042	3.25238	2	12	2	18911	KRT8,KRT18
TF	Factor: KLF16; motif: GMCACGCCCCC	TF:M03914	0.000560138	10.8019	3.25171	3251	3012	646	18911	TSPAN15,KRT8,CELSR1,KRT18,BAIAP2L1,HSPA1A,HSPA1B,WWC1,PPL,BAIAP2,TLCD1,PLPP2,PIP4K2C,FAM83H,IGSF3,P2RY2,BCAM,PKP3,MYO5B,EEF1A2,ARHGEF16,PAK4,GRB7,WFDC2,MYH14,PIGT,LAPTM4B,CDS1,LLGL2,B3GNT5,VWA1,ETNK2,IQANK1,KLC3,SOWAHC,C19ORF33,CGN,MAP3K9,AGRN,CEP170B,CTTN,BCAP31,FNBP1L,JAG2,GPRC5C,CDC42BPG,TJP1,CMTM4,SHB,SLC2A4RG,PPP1R26,RAP1GAP,REPS2,PLEKHG6,MAB21L4,INHBB,WASL,KLF5,MARVELD2,G6PD,TBC1D8,SPIRE2,N…
TF	Factor: Miz-1; motif: NNRGGWGGGGGAGGGGMRR; match class: 1	TF:M10112_1	0.00056794	10.782	3.2457	3930	4700	1152	18911	CTSV,LAMA5,KRT8,CELSR1,KRT80,KRT18,BAIAP2L1,EFNA1,RHPN2,HSPA1A,MLF1,WWC1,BAIAP2,ADGRG1,TLCD1,PLPP2,IGSF3,P2RY2,BCAM,PKP3,EEF1A2,EPCAM,ARHGEF16,PAK4,GRB7,AIF1L,LLGL2,FOXA1,KIAA1671,SCNN1A,IQANK1,PCDH1,C19ORF33,MAP3K9,ESRP1,KRT7,AGRN,CEP170B,HES1,CTTN,BCAP31,FNBP1L,WNT9A,JAG2,OVOL2,CLMN,GPRC5C,CDC42BPG,TJP1,DSC2,STAU1,SLC2A4RG,GRHL1,PPP1R26,RAP1GAP,REPS2,INHBB,MUC1,CLDN7,CTNND1,SPIRE2,DSP,CUEDC1,KD…
TF	Factor: ZF5; motif: GGSGCGCGS	TF:M10438	0.000579767	10.7522	3.23675	15442	1212	1103	18911	TSPAN15,KIAA1522,CTSV,LAMA5,KRT8,CELSR1,TUFT1,SHTN1,RIPK4,TMEM184A,KRT80,KRT18,BAIAP2L1,EFNA1,RHPN2,HSPA1A,MLF1,HSPA1B,DDX27,WWC1,PPL,MAP3K13,DDR1,CLDN4,FAM241B,BAIAP2,ADGRG1,MAL2,TOM1L1,TLCD1,PLPP2,PIP4K2C,FAM83H,IGSF3,P2RY2,BCAM,PKP3,CHMP4C,PLEKHG3,RAB5IF,PDGFB,RASEF,CCNJL,SPR,ELF3,MYO5B,EEF1A2,EPCAM,SDC4,ARHGEF16,NHLRC1,EPB41L1,PAK4,GRB7,F11R,WFDC2,PTPRF,PATJ,TNFRSF21,WNT7B,KRT15,TSKU,AIF1L,MY…
GO:BP	embryo development	GO:0009790	0.000598948	10.7053	3.22261	1075	2054	172	18911	LAMA5,KRT8,CELSR1,EFNA1,PDGFB,ELF3,SDC4,WNT7B,SLC39A1,ITGB4,FOXA1,ETNK2,HES1,LAMB3,WNT9A,C6ORF141,JAG2,OVOL2,TJP1,SIX4,HM13,CAPN2,PLS1,TFAP2A,KRT19,GRHL2,SPINT1,KDF1,ITGA3,LAMA3,EGFR,LRP5,SCEL,COBL,KIAA1217,NSDHL,EPHA2,SPINT2,ALDH1A3,LFNG,LAMB1,MYO6,PBX1,CAMSAP3,POFUT1,SCRIB,ITGB5,PHLDB2,TEAD3,FOLR1,PDCD6,PSMC4,PPP1R13L,GJB3,TM4SF1,TEAD4,DAG1,ITGA2,LRIG3,OTUD7B,KPNA7,DUSP4,CRABP2,B4GALT5,TEAD1,ST…
GO:BP	regulation of ventricular cardiac muscle cell action potential	GO:0098911	0.000601177	10.6999	3.221	12	244	5	18911	DSG2,DSC2,PKP2,DSP,JUP
GO:CC	nuclear outer membrane-endoplasmic reticulum membrane network	GO:0042175	0.000612066	10.674	3.2132	1097	4169	329	18911	PLPP2,PIGT,SLC39A1,CDS1,VAPB,TMEM132A,BCAP31,RCE1,CLMN,TGFA,GRAMD2A,HM13,EPHX1,DPM1,GPAT3,SPTSSB,SEZ6L2,POR,EGFR,ALDH3A2,NSDHL,TMEM189,PTGES,PIGU,ASPH,RAC1,DST,CNIH4,CYP1A1,ACSL3,ZDHHC9,ELOVL7,DHCR24,FOLR1,PDCD6,ARHGAP32,GPR37,RPN2,PTGFRN,ERGIC3,FA2H,LRRC8E,CTAGE4,PSEN2,RYR1,DHCR7,SDR16C5,PGRMC1,MYORG,SLC35B1,ATP6AP1,AREG,CTAGE8,LPIN3,HACD2,TMX2,DHRS3,SPTSSA,YIF1A,ERMP1,HSD11B2,RPN1,ALG3,FITM2,OR…
GO:BP	cell projection morphogenesis	GO:0048858	0.000614452	10.6684	3.21151	692	1149	77	18911	LAMA5,SHTN1,EFNA1,MAP3K13,DDR1,BAIAP2,GRB7,WNT7B,TSKU,EFNA5,CTTN,RAP1GAP,WASL,LAMC2,AURKA,ID1,YTHDF1,NCKAP1,SEMA4B,PARD6B,SPTBN2,LAMA3,EGFR,RYK,SYT17,COBL,IGSF9,SEMA3E,PARD3,EPHA2,OBSL1,L1CAM,RAC1,PRKCZ,APP,SRCIN1,SHANK2,DAG1,LMTK2,ERBB2,NTF4,OPHN1,CRABP2,TMEM106B,B4GALT5,KLK8,ANK3,LHX1,SKIL,PLA2G10,MDK,PAK6,PTK2,FGFR2,ARTN,PLXNA1,NEDD4L,CELSR2,PIK3CB,KIAA0319,NRCAM,EPHA1,IMPACT,PPP1R9A,NTN4,FSTL…
REAC	Extracellular matrix organization	REAC:R-HSA-1474244	0.000617226	10.6619	3.20956	298	327	19	18911	CTSV,LAMA5,DDR1,PDGFB,SDC4,F11R,ITGB4,ITGB6,AGRN,CDH1,LAMB3,SDC1,CAPN2,LAMC2,ITGA3,LAMA3,CTSD,LTBP3,PLEC
REAC	Adherens junctions interactions	REAC:R-HSA-418990	0.000633486	10.6244	3.19826	32	492	8	18911	CDH1,CTNND1,CDH3,JUP,NECTIN4,PVR,CTNNA1,NECTIN2
TF	Factor: E2F-3:FOXI1; motif: NGACACCGCGCCCAC	TF:M08208	0.000637037	10.6163	3.19584	11966	394	312	18911	TSPAN15,KIAA1522,CTSV,LAMA5,KRT8,CELSR1,TUFT1,SHTN1,RIPK4,TMEM184A,KRT80,KRT18,BAIAP2L1,EFNA1,RHPN2,SOX13,DDX27,WWC1,PPL,DDR1,CLDN4,FAM241B,BAIAP2,MAL2,TOM1L1,TLCD1,PLPP2,PIP4K2C,FAM83H,IGSF3,P2RY2,BCAM,PKP3,PLEKHG3,RAB5IF,RASEF,PRXL2A,CCNJL,SPR,MYO5B,EEF1A2,EPCAM,SDC4,ARHGEF16,EPB41L1,PAK4,GRB7,WFDC2,PTPRF,PATJ,KRT15,AIF1L,MYH14,ARHGAP39,LAPTM4B,ANKEF1,SLC39A1,ITGB4,CDS1,LLGL2,FOXA1,B3GNT5,SCNN1…
GO:BP	response to wounding	GO:0009611	0.00064609	10.596	3.18971	652	1095	73	18911	CELSR1,PPL,DDR1,CLDN4,PDGFB,SDC4,F11R,PTPRF,ITGB4,CLDN1,SDC1,TGFA,INHBB,AURKA,CDH3,DSP,SYT7,ERBB3,EVPL,CLDN3,OCLN,EGFR,EPPK1,PLEC,F2RL1,ANXA8,RAC1,DST,CTNNA1,CARMIL1,KLK6,CYP1A1,SCRIB,PHLDB2,CADM4,FOLR1,PLSCR1,TNFRSF12A,DAG1,ITGA2,ERBB2,F12,NOL3,KLK8,AJUBA,EPB41L4B,MDK,CD9,PLLP,MYOF,PTK2,KRT6A,FGFR2,DOCK9,SERPINA1,PIK3CB,KIAA0319,WNT4,SOX2,PROC,TGFB2,FERMT1,KLF4,DMTN,FZD6,YAP1,SYTL4,EPHB2,F3,ST3G…
HP	Hypoplastic dermoepidermal hemidesmosomes	HP:0020117	0.000656029	10.574	3.18308	5	327	4	18911	LAMB3,LAMC2,LAMA3,PLEC
HP	Abnormal dermoepidermal hemidesmosome morphology	HP:0032449	0.000656029	10.574	3.18308	5	327	4	18911	LAMB3,LAMC2,LAMA3,PLEC
TF	Factor: ZF5; motif: NGAGCGCGC	TF:M10111	0.000658656	10.5682	3.18134	2566	3040	526	18911	SHTN1,RIPK4,EFNA1,RHPN2,BAIAP2,TLCD1,IGSF3,PDGFB,RASEF,MYO5B,F11R,PTPRF,PATJ,WNT7B,CYB561,LAPTM4B,ANKEF1,LLGL2,VWA1,MET,PCDH1,STARD10,ACOT4,KRT7,AGRN,KIAA0895,ST6GALNAC2,PERP,CDH1,DSG2,TRIM47,RTL8A,SDC1,SYT12,FNBP1L,SLC25A13,C1ORF56,LSR,GPRC5C,CMTM4,SLC2A4RG,PPP1R26,INHBB,WASL,TMC7,MARVELD2,G6PD,SPIRE2,GPAT3,YTHDF1,UPP1,NANOS1,PLK2,NCKAP1,JUP,BFSP1,PARD6B,CACNG4,WFDC3,KIF21A,MCOLN3,RASAL2,CLDN3,C…
GO:BP	adherens junction maintenance	GO:0034334	0.000661226	10.5626	3.17965	8	891	6	18911	TJP1,KIFC3,PLEKHA7,INAVA,CAMSAP3,AFDN
GO:BP	cell projection assembly	GO:0030031	0.000686433	10.5086	3.1634	601	4405	196	18911	LAMA5,SHTN1,AIF1L,AGRN,TACSTD2,CTTN,FNBP1L,RAP1GAP,WASL,KLF5,NCKAP1,PLEK2,OCLN,EPS8L1,COBL,EPHA2,FHDC1,F2RL1,EMP2,CDC42EP4,RHOV,RHOD,RAC1,ESPN,CARMIL1,FAM110C,TMEM17,KIF3B,GAS8,ANLN,EPS8L2,CETN2,OPHN1,RDX,WWTR1,TBC1D30,SPAG1,AJUBA,PFN2,MAPK15,DNAH5,CCNO,CELSR2,OCRL,TTC30B,RAB17,MYO10,FGD6,DMTN,PPP1R9A,SPAG16,YAP1,TTC12,PLD1,EPS8,SLC9A3R1,CDC14B,GALNT11,SRC,ARHGEF26,DYNLRB1,CFAP206,B9D1,FAM187A,MC…
GO:BP	actin cytoskeleton reorganization	GO:0031532	0.000689881	10.5014	3.16123	107	456	14	18911	BAIAP2L1,BAIAP2,F11R,CTTN,CDC42BPG,TJP1,PLEK2,CLDN3,BCAR1,SEMA3E,MICALL2,CXADR,RHOD,CDC42BPB
REAC	EPH-ephrin mediated repulsion of cells	REAC:R-HSA-3928665	0.000694107	10.4926	3.15857	49	3243	23	18911	EFNA1,EFNA5,EPHA2,RAC1,YES1,PSEN2,EPHA1,PSENEN,EFNB2,EPHB4,EPHB2,VAV2,APH1A,MMP9,EPHB3,DNM1,EPHA4,EPHA10,CLTB,PSEN1,EFNB3,EPHA6,EFNA4
GO:BP	transmembrane receptor protein tyrosine kinase signaling pathway	GO:0007169	0.000697548	10.4854	3.15643	730	1698	111	18911	BAIAP2L1,EFNA1,DDR1,BAIAP2,PDGFB,GRB7,MET,ESRP2,ESRP1,EFNA5,STYK1,PTPN3,TGFA,SHB,REPS2,WASL,CDH3,GPRC5A,NCKAP1,ERBB3,FRK,ERRFI1,BCAR1,EGFR,RYK,FGF12,PTK6,PXN,EPHA2,ARPC1A,DUSP3,AGR2,GALNT3,RAC1,BTC,TNK1,PRKCZ,YES1,CADM4,AFAP1L2,PDCD6,ARHGEF28,FAM83A,PTPN12,LMTK2,ERBB2,NTF4,CAV2,CNKSR1,PSEN2,ATP6V1B1,MST1R,MYORG,ATP6AP1,AREG,CBLC,MYOF,GRB14,PTK2,PLEKHA1,FGFR2,ZGPAT,PIK3CB,FOXC1,WNT4,SLC2A8,COL4A6,…
HPA	adrenal gland; glandular cells[‚â•Low]	HPA:0020051	0.000708121	10.4637	3.14989	7074	1153	512	18911	TSPAN15,KIAA1522,TUFT1,RIPK4,KRT18,BAIAP2L1,HSPA1A,HSPA1B,WWC1,DDR1,FAM241B,BAIAP2,TLCD1,PIP4K2C,PKP3,CHMP4C,PLEKHG3,PDGFB,RASEF,PRXL2A,CCNJL,MYO5B,EEF1A2,SDC4,ARHGEF16,EPB41L1,GRB7,F11R,PATJ,TNFRSF21,TSKU,CYB561,ANKEF1,ITGB4,CDS1,KIAA1671,SCNN1A,MAP7,ETNK2,VAPB,MET,SOWAHC,PCDH1,MAP3K9,ITGB6,ESRP1,THRB,AGRN,EFNA5,TMEM132A,LAMB3,DSG2,EPN3,CLDN1,CTTN,BCAP31,RCE1,SDC1,FNBP1L,SLC25A13,CARD10,JAG2,TAC…
TF	Factor: E2F-2; motif: NWTTTGGCGCCAWWNN; match class: 1	TF:M11530_1	0.000730693	10.4184	3.13627	12852	3470	2601	18911	TSPAN15,KIAA1522,CTSV,LAMA5,KRT8,CELSR1,TUFT1,SHTN1,RIPK4,TMEM184A,KRT18,BAIAP2L1,EFNA1,RHPN2,HSPA1A,HSPA1B,DDX27,WWC1,PPL,MAP3K13,CLDN4,FAM241B,BAIAP2,MAL2,TOM1L1,TLCD1,PLPP2,PIP4K2C,FAM83H,IGSF3,P2RY2,PKP3,CHMP4C,PLEKHG3,RAB5IF,PDGFB,RASEF,CCNJL,SPR,MYO5B,EEF1A2,EPCAM,SDC4,ARHGEF16,NHLRC1,PAK4,F11R,WFDC2,PTPRF,PATJ,TNFRSF21,WNT7B,AIF1L,MYH14,CYB561,TSPAN6,PIGT,LAPTM4B,ANKEF1,TFAP2C,SLC39A1,ITGB…
GO:BP	epidermal growth factor receptor signaling pathway	GO:0007173	0.000740821	10.3986	3.13029	120	3623	48	18911	GRB7,PTPN3,TGFA,REPS2,GPRC5A,ERRFI1,BCAR1,EGFR,PTK6,DUSP3,AGR2,BTC,AFAP1L2,FAM83A,PTPN12,AREG,CBLC,PTK2,ZGPAT,BCAR3,SRC,FAM83B,GAREM1,RHBDF1,DAB2IP,CEACAM1,PLCE1,SOX9,MMP9,RHBDF2,EFEMP1,EPN1,KIF16B,PTPRJ,HIP1R,EGF,HGS,HAP1,PSEN1,NEURL1,EPGN,NCK2,ADORA1,SPRY1,HBEGF,PLAUR,ADAM17,EREG
HPA	parathyroid gland; glandular cells[‚â•Low]	HPA:0360051	0.000743728	10.3929	3.12859	5622	706	269	18911	KIAA1522,KRT8,KRT18,BAIAP2L1,HSPA1A,HSPA1B,DDR1,CLDN4,FAM241B,BAIAP2,TLCD1,PIP4K2C,PKP3,CHMP4C,PLEKHG3,PDGFB,RASEF,PRXL2A,CCNJL,ELF3,MYO5B,EPCAM,SDC4,ARHGEF16,F11R,PATJ,TNFRSF21,TSKU,AIF1L,MYH14,CYB561,TSPAN6,CDS1,KIAA1671,SCNN1A,MAP7,VAPB,MET,PCDH1,CGN,ITGB6,ESRP1,KRT7,EFNA5,CDH1,DSG2,EPN3,CTTN,BCAP31,RCE1,SDC1,FNBP1L,SLC25A13,CARD10,JAG2,TACC2,STYK1,ATP1B1,ABCC3,CLMN,PTPN3,SSH3,LSR,GPRC5C,TSPAN…
HPA	parathyroid gland	HPA:0360000	0.000743728	10.3929	3.12859	5622	706	269	18911	KIAA1522,KRT8,KRT18,BAIAP2L1,HSPA1A,HSPA1B,DDR1,CLDN4,FAM241B,BAIAP2,TLCD1,PIP4K2C,PKP3,CHMP4C,PLEKHG3,PDGFB,RASEF,PRXL2A,CCNJL,ELF3,MYO5B,EPCAM,SDC4,ARHGEF16,F11R,PATJ,TNFRSF21,TSKU,AIF1L,MYH14,CYB561,TSPAN6,CDS1,KIAA1671,SCNN1A,MAP7,VAPB,MET,PCDH1,CGN,ITGB6,ESRP1,KRT7,EFNA5,CDH1,DSG2,EPN3,CTTN,BCAP31,RCE1,SDC1,FNBP1L,SLC25A13,CARD10,JAG2,TACC2,STYK1,ATP1B1,ABCC3,CLMN,PTPN3,SSH3,LSR,GPRC5C,TSPAN…
HPA	adrenal gland	HPA:0020000	0.000745818	10.3889	3.12737	7079	2014	861	18911	TSPAN15,KIAA1522,TUFT1,RIPK4,KRT18,BAIAP2L1,HSPA1A,HSPA1B,WWC1,DDR1,FAM241B,BAIAP2,TLCD1,PIP4K2C,PKP3,CHMP4C,PLEKHG3,PDGFB,RASEF,PRXL2A,CCNJL,MYO5B,EEF1A2,SDC4,ARHGEF16,EPB41L1,GRB7,F11R,PATJ,TNFRSF21,TSKU,CYB561,ANKEF1,ITGB4,CDS1,KIAA1671,SCNN1A,MAP7,ETNK2,VAPB,MET,SOWAHC,PCDH1,MAP3K9,ITGB6,ESRP1,THRB,AGRN,EFNA5,TMEM132A,LAMB3,DSG2,EPN3,CLDN1,CTTN,BCAP31,RCE1,SDC1,FNBP1L,SLC25A13,CARD10,JAG2,TAC…
HPA	skin 2; epidermal cells[‚â•Medium]	HPA:0470682	0.000759732	10.3622	3.11934	4583	706	227	18911	KIAA1522,TUFT1,BAIAP2L1,HSPA1A,HSPA1B,PPL,DDR1,CLDN4,FAM241B,BAIAP2,PIP4K2C,FAM83H,PKP3,CHMP4C,PDGFB,RASEF,PRXL2A,MYO5B,SDC4,ARHGEF16,EPB41L1,GRB7,F11R,PATJ,TNFRSF21,KRT15,TSPAN6,ANKEF1,TFAP2C,ITGB4,KIAA1671,MAP7,KLC3,VAPB,MET,SOWAHC,LYPD3,ESRP1,EFNA5,SFN,CEP170B,TACSTD2,CDH1,S100A2,CLDN1,CTTN,BCAP31,RCE1,TACC2,ZNF185,ABCC3,PTPN3,CDC42BPG,PRPF6,MPZL2,STON2,DSC2,STAU1,RAP1GAP,TFAP2A,WASL,VMP1,KLF5…
HPA	epididymis; glandular cells[‚â•Medium]	HPA:0180052	0.000770093	10.3427	3.11346	5403	706	260	18911	KIAA1522,KRT8,KRT18,HSPA1A,HSPA1B,WWC1,DDR1,CLDN4,FAM241B,BAIAP2,TLCD1,PIP4K2C,CHMP4C,PLEKHG3,PDGFB,RASEF,PRXL2A,MYO5B,EPCAM,SDC4,ARHGEF16,WFDC2,PATJ,TNFRSF21,AIF1L,MYH14,CYB561,TSPAN6,CDS1,KIAA1671,SCNN1A,MAP7,VAPB,MET,CGN,MAP3K9,ESRP1,KRT7,EFNA5,CEP170B,CDH1,DSG2,EPN3,CLDN1,CTTN,BCAP31,RCE1,FNBP1L,CARD10,JAG2,TACC2,ZNF185,ATP1B1,CLMN,SSH3,LSR,TSPAN1,PRPF6,TGFA,TJP1,MPZL2,CMTM4,STON2,HM13,STAU1,…
GO:BP	cellular component maintenance	GO:0043954	0.000776254	10.3312	3.11	67	631	13	18911	CLDN1,CTTN,TJP1,KIFC3,ITGA3,PLEKHA7,CLDN3,INAVA,F2RL1,CAMSAP3,PCLO,SHANK2,OPHN1
TF	Factor: CNOT3; motif: GGCCGCGSSS; match class: 1	TF:M01253_1	0.000777102	10.3296	3.10952	997	2302	185	18911	CELSR1,BAIAP2,FAM83H,MYO5B,PTPRF,IQANK1,SOWAHC,PCDH1,AGRN,TACSTD2,TMEM30B,JAG2,SLC2A4RG,GRHL1,PPP1R26,REPS2,INHBB,CITED4,TBC1D8,DLG5,NANOS1,SYT7,CACNG4,ITGA3,PANX2,GOLM1,LAMA3,STX1A,SLC6A11,TC2N,LRP5,CTSD,HES4,HOOK1,GNG4,MAP3K21,ATP9A,LFNG,ARFGEF3,ADAM15,FAM189A2,CDC42BPB,NR2F6,FAM110C,SIK1B,SUSD4,PWWP2B,PPP1R13B,KIAA1211L,SPATS2L,DAG1,ITGA2,LRP11,DBNDD1,PTPN12,USP43,PTGFRN,CAV2,SYNM,ZNF512B,WWTR…
GO:BP	regulation of cell-substrate adhesion	GO:0010810	0.000781346	10.3218	3.10716	216	1277	37	18911	DDR1,PDGFB,SDC4,EFNA5,TACSTD2,GCNT2,JUP,ITGA3,SEMA3E,LIMCH1,DUSP3,EMP2,ADAM15,AGR2,RHOD,RAC1,CARMIL1,CAMSAP3,PHLDB2,PRKCZ,S100A10,DAG1,MDK,RIN2,PTK2,PIK3CB,WNT4,EPHA1,FERMT1,DMTN,SRC,CX3CL1,ACTN4,NPNT,CEACAM6,EPB41L5,FUT1
HP	Abnormal number of teeth	HP:0006483	0.000789326	10.3071	3.10274	307	269	18	18911	RIPK4,EEF1A2,ITGB4,PERP,CDH1,LAMB3,CLDN1,TGFA,TFAP2A,LAMC2,CTNND1,CDH3,GRHL2,LMNA,DSP,KDF1,IRF6,LAMA3
TF	Factor: ZEB; motif: NNNCAGGTGNSN	TF:M07371	0.000792625	10.3011	3.10093	618	564	47	18911	KIAA1522,PPL,FAM241B,MAL2,PIP4K2C,FAM83H,PKP3,RASEF,ARHGEF16,GRB7,PATJ,CYB561,LLGL2,MAP7,IQANK1,AP1M2,CDC42BPG,TGFA,MPZL2,CMTM4,PLEKHG6,MAB21L4,CLDN7,CDH3,DSP,SPINT1,KDF1,TMEM51,MCOLN3,SLC6A11,PTK6,LRRC1,ZNF488,C11ORF80,THAP10,FAM131C,ENPP5,TTC39A,CTNNA1,RASSF7,DPY30,ELOVL7,CDCP1,CRB3,PPP1R13B,NIPAL1,MYO5C
GO:BP	ERBB signaling pathway	GO:0038127	0.000798673	10.2901	3.09763	142	3623	54	18911	GRB7,PTPN3,TGFA,REPS2,GPRC5A,ERBB3,ERRFI1,BCAR1,EGFR,PTK6,DUSP3,AGR2,BTC,AFAP1L2,FAM83A,PTPN12,ERBB2,AREG,CBLC,PTK2,ZGPAT,BCAR3,SRC,FAM83B,GAREM1,RHBDF1,DAB2IP,CEACAM1,PLCE1,SH3TC2,SOX9,MMP9,LGMN,RHBDF2,EFEMP1,NRG4,EPN1,KIF16B,PTPRJ,HIP1R,EGF,NRG1,HGS,HAP1,PSEN1,NEURL1,EPGN,NCK2,ADORA1,SPRY1,HBEGF,PLAUR,ADAM17,EREG
HPA	cerebral cortex; neuropil[‚â•Medium]	HPA:0100212	0.000806336	10.2763	3.09348	2565	3583	576	18911	TSPAN15,DDR1,FAM241B,BAIAP2,PIP4K2C,PLEKHG3,PDGFB,ARHGEF16,EPB41L1,TNFRSF21,KIAA1671,SCNN1A,MAP7,VAPB,PCDH1,MAP3K9,ACOT4,EFNA5,CTTN,RCE1,SYT12,FNBP1L,SLC25A13,ATP1B1,PTPN3,STAU1,WASL,VMP1,ADRM1,ID1,NANOS1,PLK2,GCNT2,SYT7,CUEDC1,SEMA4B,JUP,PANX2,PLEK2,LACTB2,SPTBN2,FRK,NUDT14,KIF21A,PLEKHA7,SEZ6L2,STX1A,RASAL2,POR,SLC6A11,PCSK1N,TC2N,HID1,STAP2,COBL,KIAA1217,PARD3,NDUFS6,PC,PXN,GRTP1,IQCE,OBSL1,NA…
GO:BP	cell-cell adhesion via plasma-membrane adhesion molecules	GO:0098742	0.000809157	10.2713	3.09197	226	385	21	18911	CELSR1,CLDN4,EPCAM,PTPRF,PCDH1,EFNA5,CDH1,DSG2,CLDN9,CLDN1,MPZL2,DSC2,CLDN7,CDH3,CLDN3,NECTIN4,IGSF9,OBSL1,PVR,L1CAM,CXADR
GO:BP	protein localization to cell-cell junction	GO:0150105	0.000818774	10.2542	3.08684	22	1843	12	18911	F11R,LSR,TJP1,DLG5,DSP,SCRIB,TJP3,ACTN4,MPP7,CGNL1,CDH5,TJP2
TF	Factor: E2F-1; motif: TTGGCGCGRAANNGNM	TF:M00938	0.000839665	10.2179	3.07589	7048	2803	1220	18911	KIAA1522,CTSV,LAMA5,CELSR1,TUFT1,SHTN1,KRT18,RHPN2,HSPA1A,WWC1,PPL,CLDN4,TOM1L1,TLCD1,PLPP2,FAM83H,P2RY2,CHMP4C,PLEKHG3,RAB5IF,PDGFB,RASEF,CCNJL,SPR,MYO5B,EEF1A2,EPCAM,ARHGEF16,EPB41L1,F11R,WFDC2,PTPRF,PATJ,TNFRSF21,AIF1L,MYH14,CYB561,LAPTM4B,ANKEF1,SLC39A1,CDS1,LLGL2,FOXA1,MAP7,VWA1,ETNK2,KLC3,MET,SOWAHC,PCDH1,C19ORF33,LYPD3,CGN,ESRP1,ACOT4,KRT7,KIAA0895,YIPF6,ST6GALNAC2,CPVL,PERP,HES1,TACSTD2,T…
HP	Anomalous pulmonary venous return	HP:0010772	0.000848255	10.2032	3.07147	67	3884	32	18911	LFNG,GAS8,DHCR24,SPAG1,DNAH5,CCNO,NR2F2,TTC12,MCIDAS,CCDC40,CCDC103,MESP2,DNAAF5,FOXJ1,CFAP300,GATA4,HYDIN,MYRF,CCDC151,DNAL1,DNAAF3,RSPH1,CFAP221,RIPPLY2,DLL3,DNAI1,RSPH3,GATA6,DNAAF4,DNAJB13,SPEF2,DRC1
HPA	liver; bile duct cells[‚â•Medium]	HPA:0290392	0.000854317	10.1929	3.06838	1853	599	95	18911	TSPAN15,KRT8,KRT18,BAIAP2L1,HSPA1A,HSPA1B,WWC1,PPL,TLCD1,PDGFB,MYO5B,SDC4,EPB41L1,GRB7,F11R,TNFRSF21,MYH14,TSPAN6,KIAA1671,VAPB,MET,KRT7,CDH1,DSG2,CLDN1,CTTN,BCAP31,RCE1,FNBP1L,CARD10,JAG2,CLMN,MIPOL1,STAU1,WASL,CLDN7,G6PD,KRT19,PIR,NANOS1,LMNA,PLK2,LAD1,CUEDC1,JUP,GOLM1,NUDT14,TC2N,CLDN3,LRP5,STAP2,C1ORF116,KIAA1217,PON2,PLEC,ALDH3A2,TNKS1BP1,GRTP1,NAXE,ARPC1A,PSMA7,STX3,SLC44A3,CXADR,FAM174B,AN…
TF	Factor: Sp6; motif: WGGGCGG	TF:M05361	0.000906706	10.1071	3.04253	8225	3954	1948	18911	TSPAN15,KIAA1522,CTSV,LAMA5,CELSR1,TUFT1,SHTN1,RIPK4,TMEM184A,KRT80,BAIAP2L1,EFNA1,RHPN2,SOX13,MLF1,HSPA1B,DDX27,WWC1,PPL,CLDN4,FAM241B,BAIAP2,MAL2,TOM1L1,TLCD1,PLPP2,FAM83H,IGSF3,P2RY2,BCAM,PDGFB,RASEF,CCNJL,SPR,SDC4,ARHGEF16,NHLRC1,GRB7,F11R,WFDC2,TNFRSF21,WNT7B,ARHGAP39,CYB561,ANKEF1,SLC39A1,LLGL2,SCNN1A,MAP7,IQANK1,TSPAN13,MET,SOWAHC,CGN,MAP3K9,ESRP2,ESRP1,KRT7,AGRN,TRIM16L,EFNA5,SFN,KIAA0895…
TF	Factor: CPBP; motif: NGGGCGG	TF:M05444	0.000906706	10.1071	3.04253	8225	3954	1948	18911	TSPAN15,KIAA1522,CTSV,LAMA5,CELSR1,TUFT1,SHTN1,RIPK4,TMEM184A,KRT80,BAIAP2L1,EFNA1,RHPN2,SOX13,MLF1,HSPA1B,DDX27,WWC1,PPL,CLDN4,FAM241B,BAIAP2,MAL2,TOM1L1,TLCD1,PLPP2,FAM83H,IGSF3,P2RY2,BCAM,PDGFB,RASEF,CCNJL,SPR,SDC4,ARHGEF16,NHLRC1,GRB7,F11R,WFDC2,TNFRSF21,WNT7B,ARHGAP39,CYB561,ANKEF1,SLC39A1,LLGL2,SCNN1A,MAP7,IQANK1,TSPAN13,MET,SOWAHC,CGN,MAP3K9,ESRP2,ESRP1,KRT7,AGRN,TRIM16L,EFNA5,SFN,KIAA0895…
TF	Factor: Sp2; motif: WGGGCGG	TF:M05332	0.000906706	10.1071	3.04253	8225	3954	1948	18911	TSPAN15,KIAA1522,CTSV,LAMA5,CELSR1,TUFT1,SHTN1,RIPK4,TMEM184A,KRT80,BAIAP2L1,EFNA1,RHPN2,SOX13,MLF1,HSPA1B,DDX27,WWC1,PPL,CLDN4,FAM241B,BAIAP2,MAL2,TOM1L1,TLCD1,PLPP2,FAM83H,IGSF3,P2RY2,BCAM,PDGFB,RASEF,CCNJL,SPR,SDC4,ARHGEF16,NHLRC1,GRB7,F11R,WFDC2,TNFRSF21,WNT7B,ARHGAP39,CYB561,ANKEF1,SLC39A1,LLGL2,SCNN1A,MAP7,IQANK1,TSPAN13,MET,SOWAHC,CGN,MAP3K9,ESRP2,ESRP1,KRT7,AGRN,TRIM16L,EFNA5,SFN,KIAA0895…
GO:BP	hormone metabolic process	GO:0042445	0.000923701	10.0803	3.03447	225	4930	95	18911	FOXA1,POR,PCSK1N,ALDH1A3,KLK6,CYP1A1,CLCN2,CRABP2,DHCR7,SDR16C5,PLEKHA1,DHRS3,RBP1,WNT4,SRD5A1,CYP26B1,AKR1B10,RDH13,CTSL,PCSK6,CYP2S1,AKR1B15,AKR1C3,BACE2,CYP1B1,GAL,AKR1C2,ECE1,CYP26C1,CPE,ZMPSTE24,ATP1A1,LRAT,DGAT2,HPN,FOXE1,SGPL1,CHST9,DUOXA1,ACE2,AKR1C1,PPARGC1A,CGA,TIPARP,DHRS11,TCF7L2,GATA3,ADH7,HFE,PNPLA4,DUOX2,CYP27C1,DHRS9,DUOX1,HSD17B3,CYP26A1,BCO1,ADM,CACNA1H,STARD3,RDH12,DIO2,FURIN,P…
HPA	fallopian tube; glandular cells[‚â•Medium]	HPA:0210052	0.000925737	10.0771	3.03351	5704	1153	423	18911	TSPAN15,KIAA1522,KRT8,KRT18,BAIAP2L1,HSPA1A,HSPA1B,WWC1,PPL,DDR1,CLDN4,BAIAP2,TLCD1,FAM83H,PLEKHG3,PDGFB,RASEF,ELF3,MYO5B,EPCAM,SDC4,EPB41L1,GRB7,WFDC2,PATJ,TNFRSF21,TSKU,MYH14,TSPAN6,ANKEF1,CDS1,KIAA1671,SCNN1A,MAP7,ETNK2,VAPB,MET,SOWAHC,CGN,MAP3K9,ESRP1,ACOT4,KRT7,CEP170B,CDH1,DSG2,CLDN1,CTTN,BCAP31,RCE1,FNBP1L,CARD10,JAG2,ABCC3,CLMN,PTPN3,LSR,GPRC5C,TSPAN1,PRPF6,TGFA,TJP1,MPZL2,CMTM4,STON2,DSC…
HP	Onychogryposis	HP:0001805	0.000930904	10.0691	3.0311	22	3920	16	18911	EGFR,PLEC,KRT17,KRT6A,FZD6,KRT16,KRT5,GJB6,SLURP1,KRT6B,IKBKG,COL7A1,TP63,ADAM17,CTSC,DVL3
GO:BP	placenta development	GO:0001890	0.00094719	10.0441	3.02356	159	1976	39	18911	CTSV,KRT8,PDGFB,WNT7B,ETNK2,HES1,OVOL2,KRT19,GRHL2,SPINT1,EGFR,NSDHL,SPINT2,GJB3,ST14,PTK2,PHLDA2,ITGB8,FGFR2,PLCD3,NR2F2,PPARG,STK3,RXRA,SOX15,CEBPB,GJB2,PLAC1,STOX2,FZD5,GJB5,MDFI,DLX3,EPAS1,SENP2,LDOC1,TPPP3,BMP7,CYR61
REAC	Inhibition of Signaling by Overexpressed EGFR	REAC:R-HSA-5638303	0.000949208	10.041	3.02264	8	3623	8	18911	TGFA,EGFR,BTC,AREG,EGF,EPGN,HBEGF,EREG
REAC	Signaling by Overexpressed Wild-Type EGFR in Cancer	REAC:R-HSA-5638302	0.000949208	10.041	3.02264	8	3623	8	18911	TGFA,EGFR,BTC,AREG,EGF,EPGN,HBEGF,EREG
WP	Prostaglandin Synthesis and Regulation	WP:WP98	0.000959522	10.0254	3.01794	45	2706	19	18911	PTGES,ANXA3,S100A10,PTGFRN,HSD11B2,ANXA2,PPARG,S100A6,EDN1,AKR1C3,CBR1,AKR1C2,ANXA1,SOX9,AKR1C1,PPARGC1A,HPGD,ANXA4,SCGB1A1
REAC	Death Receptor Signalling	REAC:R-HSA-73887	0.000960883	10.0234	3.01733	140	3249	47	18911	ARHGEF16,ARHGEF5,RAC1,ARHGEF35,ECT2,SQSTM1,OTUD7B,PSEN2,TAX1BP1,FADD,PSENEN,ARHGEF37,ARHGEF26,ARHGEF10L,PRKCI,VAV2,SHARPIN,APH1A,ARHGEF19,KALRN,PLEKHG5,MCF2L,BEX3,NGEF,TAB3,IRAK1,RTN4R,TNFSF10,TRAF2,BAD,TRIO,NET1,ARHGEF17,ITSN1,FGD4,ARHGEF38,TNFRSF1A,ARHGEF12,PSEN1,ARHGEF3,UBC,IKBKG,ARHGEF4,NGFR,ARHGEF33,ARHGEF39,ARHGEF11
TF	Factor: AREB6; motif: VNRCACCTGKNC	TF:M00414	0.00096419	10.0184	3.01584	1655	1445	197	18911	KIAA1522,LAMA5,KRT8,RIPK4,TMEM184A,KRT18,BAIAP2L1,MAL2,FAM83H,PLEKHG3,MYO5B,ARHGEF16,PIGT,LLGL2,SCNN1A,VWA1,IQANK1,MAP3K9,ESRP1,KRT7,YIPF6,CEP170B,CDH1,TMEM30B,AP1M2,TRIM47,CLDN9,RCE1,FNBP1L,WNT9A,ABCC3,SSH3,LSR,MARVELD3,ZNF205,RGL3,KRT4,TFAP2A,TMEM265,CLDN7,C11ORF52,LMNA,KDF1,ABHD11,IRF6,SPTBN2,ERBB3,NUDT14,PLEKHA7,POR,MTARC1,PPFIA1,CTSD,NECTIN4,COBL,DMKN,ANXA8L1,CARD14,ANKRD18A,GALE,ZNF488,ARHG…
TF	Factor: DB1; motif: GGRRRRGRRGGAGGGGGNGRRR; match class: 1	TF:M10107_1	0.000967683	10.0132	3.01427	2563	3954	665	18911	KIAA1522,LAMA5,BAIAP2L1,EFNA1,MLF1,CLDN4,BAIAP2,PLPP2,ARHGEF16,GRB7,WFDC2,AIF1L,ARHGAP39,CYB561,CDS1,SCNN1A,PCDH1,MAP3K9,ESRP2,ESRP1,KRT7,AGRN,CEP170B,BCAP31,PRSS22,SDC1,FNBP1L,SLC25A13,C6ORF141,OVOL2,ATP1B1,TJP1,PPP1R26,TFAP2A,INHBB,MUC1,MPP3,B3GNT3,SPIRE2,DLG5,CACNG4,ABHD11,TMEM51,PLEKHA7,SEZ6L2,EGFR,SYT17,PARD3,SERTAD4,FAXC,FGF12,PRSS8,TNKS1BP1,GRTP1,HOOK1,OBSL1,INHA,FHDC1,STX3,PACSIN3,SNCG,CX…
GO:BP	plasma membrane bounded cell projection morphogenesis	GO:0120039	0.000983873	9.98924	3.00706	688	1149	76	18911	LAMA5,SHTN1,EFNA1,MAP3K13,DDR1,BAIAP2,GRB7,WNT7B,TSKU,EFNA5,CTTN,RAP1GAP,WASL,LAMC2,AURKA,ID1,YTHDF1,NCKAP1,SEMA4B,PARD6B,SPTBN2,LAMA3,EGFR,RYK,SYT17,COBL,IGSF9,SEMA3E,PARD3,EPHA2,OBSL1,L1CAM,RAC1,PRKCZ,APP,SRCIN1,SHANK2,DAG1,LMTK2,ERBB2,NTF4,OPHN1,CRABP2,TMEM106B,B4GALT5,KLK8,ANK3,LHX1,SKIL,PLA2G10,PAK6,PTK2,FGFR2,ARTN,PLXNA1,NEDD4L,CELSR2,PIK3CB,KIAA0319,NRCAM,EPHA1,IMPACT,PPP1R9A,NTN4,FSTL4,EF…
REAC	MET activates PTK2 signaling	REAC:R-HSA-8874081	0.00101196	9.94864	2.99484	30	769	9	18911	LAMA5,MET,LAMB3,LAMC2,ITGA3,LAMA3,LAMB1,ITGA2,PTK2
GO:BP	olefinic compound metabolic process	GO:0120254	0.00102906	9.92446	2.98756	121	4735	56	18911	EPHX1,PTGES,ALDH1A3,DAGLA,CYP1A1,CLCN2,SDR16C5,PLA2G10,WNT4,SRD5A1,CYP4F3,RDH13,CYP2S1,CYP4F11,ACOT8,AKR1C3,CYP2J2,CBR1,CYP1B1,AKR1C2,FAAH2,ACOX1,CYP4F12,ELOVL2,ALOX15,PTGES2,AKR1C1,PPARGC1A,ABCD1,CYP27C1,DHRS9,HSD17B3,ALOXE3,FAAH,GSTA1,BCO1,ADM,CACNA1H,STARD3,CYP2C8,BMP2,AKR1C4,ALDH1A2,RDH11,CYP1A2,EPHX2,AWAT1,PTGS2,BCO2,MGLL,FADS1,GRIN1,BMP5,PTGES3,ELOVL1,LHB
TF	Factor: ZXDA; motif: NAGGGTG	TF:M06203	0.00103364	9.91805	2.98563	7036	1888	857	18911	TSPAN15,KIAA1522,CTSV,KRT8,TUFT1,SHTN1,KRT80,KRT18,EFNA1,RHPN2,HSPA1B,PPL,DDR1,ADGRG1,MAL2,PIP4K2C,FAM83H,IGSF3,P2RY2,BCAM,PKP3,PLEKHG3,PDGFB,CCNJL,SPR,ELF3,EEF1A2,NHLRC1,EPB41L1,PATJ,TNFRSF21,KRT15,TSKU,AIF1L,MYH14,CYB561,SLC39A1,ITGB4,FOXA1,KIAA1671,SCNN1A,MAP7,VWA1,ETNK2,IQANK1,KLC3,CGN,ITGB6,PMEPA1,ESRP2,ESRP1,THRB,ACOT4,TRIM16L,SFN,KIAA0895,ST6GALNAC2,CPVL,CEP170B,TACSTD2,TMEM30B,LAMB3,CLDN9…
TF	Factor: ZXDB; motif: NAGGGTG	TF:M06202	0.00103364	9.91805	2.98563	7036	1888	857	18911	TSPAN15,KIAA1522,CTSV,KRT8,TUFT1,SHTN1,KRT80,KRT18,EFNA1,RHPN2,HSPA1B,PPL,DDR1,ADGRG1,MAL2,PIP4K2C,FAM83H,IGSF3,P2RY2,BCAM,PKP3,PLEKHG3,PDGFB,CCNJL,SPR,ELF3,EEF1A2,NHLRC1,EPB41L1,PATJ,TNFRSF21,KRT15,TSKU,AIF1L,MYH14,CYB561,SLC39A1,ITGB4,FOXA1,KIAA1671,SCNN1A,MAP7,VWA1,ETNK2,IQANK1,KLC3,CGN,ITGB6,PMEPA1,ESRP2,ESRP1,THRB,ACOT4,TRIM16L,SFN,KIAA0895,ST6GALNAC2,CPVL,CEP170B,TACSTD2,TMEM30B,LAMB3,CLDN9…
TF	Factor: GEMIN3; motif: NCWGGRARRGRGNGNG	TF:M09727	0.00105495	9.88861	2.97677	8177	147	100	18911	TSPAN15,KIAA1522,CTSV,KRT8,SHTN1,RIPK4,TMEM184A,KRT80,BAIAP2L1,EFNA1,RHPN2,SOX13,HSPA1A,MLF1,WWC1,DDR1,CLDN4,FAM241B,BAIAP2,ADGRG1,MAL2,TLCD1,PLPP2,FAM83H,IGSF3,P2RY2,BCAM,PKP3,RAB5IF,PDGFB,RASEF,PRXL2A,SPR,ELF3,MYO5B,EEF1A2,SDC4,ARHGEF16,NHLRC1,EPB41L1,GRB7,WFDC2,PTPRF,TNFRSF21,KRT15,AIF1L,MYH14,ARHGAP39,CYB561,LAPTM4B,ANKEF1,SLC39A1,FOXA1,KIAA1671,SCNN1A,MAP7,VWA1,PON3,ETNK2,KLC3,VAPB,TSPAN13,M…
GO:BP	small GTPase mediated signal transduction	GO:0007264	0.00107832	9.85699	2.96725	513	3043	127	18911	CELSR1,SHTN1,ADGRG1,ARHGEF16,F11R,ARHGAP39,MET,RGL3,RAP1GAP,PLK2,NCKAP1,ITGA3,EPS8L1,ARHGAP8,ARHGAP29,ARHGEF5,F2RL1,ARFGEF3,CDC42EP4,RHOV,RHOD,RAC1,TNK1,DHCR24,ECT2,CADM4,SQSTM1,ARHGEF28,RTKN,ARHGAP32,EPS8L2,OPHN1,CNKSR1,RDX,SYDE2,ARAP3,RIN2,DOCK9,SH2D3A,PIK3CB,OCRL,RND3,TGFB2,RAB38,RERG,PLD1,EPS8,EPHB2,BCAR3,RAB12,SRC,ARHGEF26,ARHGAP5,RAB15,IQGAP3,RGL2,DAB2IP,ARHGAP40,ARFGEF2,JUN,NTN1,RHEB,CGNL1…
GO:BP	cellular lipid metabolic process	GO:0044255	0.00108395	9.84949	2.96499	1038	3142	240	18911	PLPP2,PIP4K2C,PDGFB,SDC4,PIGT,CDS1,B3GNT5,PON3,ETNK2,VAPB,STARD10,ACOT4,AGRN,SDC1,EPHX1,CAPN2,DPM1,GPAT3,LIPH,ACP6,SPTSSB,POR,EHHADH,EGFR,PON2,ALDH3A2,SLC44A3,TMEM189,PTGES,ALDH1A3,EIF6,PIGU,DAGLA,CYP1A1,ACSL3,ELOVL7,ALDH3B2,PRKAA2,B3GALNT1,PLSCR1,CHKA,FA2H,PLBD1,CRABP2,B4GALT5,SDR16C5,ATP6V1B1,AJUBA,CYP24A1,PLA2G10,PTGR1,LPIN3,ALDH3B1,HACD2,PLEKHA1,DHRS3,SPTSSA,ACSS2,ITGB8,RBP1,ALG3,FITM2,ORMDL2…
GO:CC	cell-cell contact zone	GO:0044291	0.00111061	9.81443	2.95444	76	531	14	18911	DSG2,ATP1B1,TJP1,DSC2,PKP2,DSP,JUP,OBSL1,CXADR,CTNNA1,SLC2A1,SCRIB,NECTIN2,CADM4
TF	Factor: GKLF; motif: NNNRGGNGNGGSN	TF:M07289	0.00113728	9.7802	2.94413	13965	2401	1963	18911	TSPAN15,KIAA1522,CTSV,LAMA5,KRT8,CELSR1,TUFT1,SHTN1,TMEM184A,KRT80,KRT18,BAIAP2L1,EFNA1,RHPN2,SOX13,HSPA1A,MLF1,HSPA1B,WWC1,PPL,MAP3K13,DDR1,CLDN4,FAM241B,BAIAP2,ADGRG1,MAL2,TOM1L1,TLCD1,PLPP2,PIP4K2C,FAM83H,IGSF3,P2RY2,BCAM,PKP3,PDGFB,RASEF,PRXL2A,CCNJL,ELF3,MYO5B,EEF1A2,EPCAM,SDC4,ARHGEF16,NHLRC1,EPB41L1,PAK4,GRB7,F11R,WFDC2,PTPRF,PATJ,TNFRSF21,KRT15,TSKU,AIF1L,MYH14,CYB561,TSPAN6,LAPTM4B,ANKEF…
TF	Factor: ctcf; motif: YGGCCACCAGRKGGCRSYN; match class: 1	TF:M09890_1	0.00113893	9.7781	2.9435	2765	3578	654	18911	KIAA1522,LAMA5,CELSR1,BAIAP2L1,SOX13,WWC1,TOM1L1,PLPP2,P2RY2,PKP3,RAB5IF,PDGFB,CCNJL,SPR,ELF3,ARHGEF16,F11R,AIF1L,LAPTM4B,SLC39A1,FOXA1,KIAA1671,MAP7,ETNK2,SOWAHC,PCDH1,MAP3K9,ESRP2,ESRP1,KRT7,AGRN,SFN,ST6GALNAC2,TMEM132A,TRIM47,CLDN9,FNBP1L,JAG2,ATP1B1,SSH3,LSR,GPRC5C,PRPF6,TJP1,SHB,STAU1,SLC2A4RG,PPP1R26,EPHX1,PLEKHG6,MUC1,CITED4,DNAH14,ADRM1,SPIRE2,DLG5,PLK2,NCKAP1,PANX2,MISP,TPD52L1,LAMA3,EVP…
TF	Factor: E2A; motif: CACCTGNY	TF:M00973	0.00114654	9.76849	2.94061	5137	476	192	18911	KIAA1522,CELSR1,TUFT1,RIPK4,TMEM184A,RHPN2,WWC1,PPL,FAM241B,ADGRG1,MAL2,FAM83H,IGSF3,BCAM,CHMP4C,PDGFB,SPR,ELF3,MYO5B,EEF1A2,EPCAM,ARHGEF16,NHLRC1,GRB7,PTPRF,TNFRSF21,WNT7B,KRT15,TSKU,CYB561,PIGT,ANKEF1,TFAP2C,CDS1,KIAA1671,SCNN1A,MAP7,ETNK2,IQANK1,KLC3,MET,PCDH1,C19ORF33,MAP3K9,ITGB6,ESRP2,ESRP1,KRT7,SFN,CPVL,CDH1,AP1M2,LAMB3,TRIM47,CLDN9,CLDN1,BCAP31,SLC25A13,CARD10,SLPI,ZNF185,ATP1B1,ABCC3,PTP…
GO:MF	transmembrane receptor protein tyrosine kinase activity	GO:0004714	0.0011658	9.74447	2.93338	62	3311	27	18911	DDR1,MET,ERBB3,EGFR,EPHA2,ERBB2,MST1R,FGFR2,EPHA1,EPHB4,EPHB2,FGFR3,FGFR4,TYRO3,IGF1R,EPHB3,EPHA4,EFEMP1,MERTK,NRP1,EPHA10,PDGFRL,EFNB3,EPHA6,EFNA4,NRP2,CRIM1
HP	Palmoplantar hyperkeratosis	HP:0000972	0.00118085	9.72596	2.92781	34	3792	20	18911	DSP,PLEC,KRT17,FERMT1,KRT83,KRT16,KRT5,GJB2,NECTIN1,PKP1,RHBDF2,GJB6,SLURP1,HPGD,AAGAB,KRT9,COL7A1,KRT10,TGM1,CTSC
REAC	Signaling by MET	REAC:R-HSA-6806834	0.00118472	9.72124	2.92639	76	462	11	18911	LAMA5,MET,LAMB3,LAMC2,SPINT1,ITGA3,LAMA3,SPINT2,LAMB1,RAC1,TNS3
GO:BP	cell morphogenesis involved in neuron differentiation	GO:0048667	0.00120121	9.7013	2.92038	611	4921	215	18911	LAMA5,SHTN1,EFNA1,MAP3K13,BAIAP2,GRB7,TSKU,EFNA5,HES1,CTTN,RAP1GAP,PLS1,WASL,LAMC2,ID1,YTHDF1,SEMA4B,PARD6B,SPTBN2,LAMA3,RYK,COBL,IGSF9,SEMA3E,PARD3,EPHA2,OBSL1,L1CAM,RAC1,SCRIB,APP,SRCIN1,SHANK2,DAG1,LMTK2,ERBB2,OPHN1,CRABP2,TMEM106B,B4GALT5,ANK3,LHX1,SKIL,PLA2G10,PTK2,FGFR2,ARTN,PLXNA1,NEDD4L,CELSR2,PIK3CB,KIAA0319,NRCAM,EPHA1,PPP1R9A,NTN4,FSTL4,EFNB2,EPHB4,EPHB2,SLC9A3R1,S100A6,SRC,SEMA6B,TANC…
CORUM	Polycystin-1 multiprotein complex (ACTN1, CDH1, SRC, JUP, VCL, CTNNB1, PXN, BCAR1, PKD1, PTK2, TLN1)	CORUM:5177	0.00122632	9.67144	2.91139	11	1091	6	18911	CDH1,JUP,BCAR1,PXN,PTK2,SRC
TF	Factor: ER-beta; motif: RGGTCASCNTGMCCY	TF:M09910	0.00123851	9.65718	2.9071	9082	564	348	18911	KIAA1522,LAMA5,KRT8,CELSR1,TUFT1,SHTN1,RIPK4,TMEM184A,KRT80,KRT18,BAIAP2L1,RHPN2,HSPA1A,MLF1,HSPA1B,PPL,CLDN4,FAM241B,BAIAP2,ADGRG1,MAL2,TLCD1,PLPP2,FAM83H,P2RY2,PKP3,PRXL2A,CCNJL,EEF1A2,EPCAM,SDC4,ARHGEF16,NHLRC1,EPB41L1,F11R,PTPRF,PATJ,WNT7B,KRT15,TSKU,AIF1L,MYH14,ARHGAP39,CYB561,TSPAN6,TFAP2C,CDS1,LLGL2,FOXA1,KIAA1671,B3GNT5,MAP7,VWA1,PON3,IQANK1,KLC3,VAPB,SOWAHC,PCDH1,C19ORF33,CGN,MAP3K9,ESRP…
HP	Anonychia	HP:0001798	0.00127749	9.61247	2.89364	60	327	9	18911	RIPK4,ITGB4,LAMB3,LAMC2,GRHL2,DSP,JUP,LAMA3,PLEC
GO:CC	polymeric cytoskeletal fiber	GO:0099513	0.00132042	9.56479	2.87929	671	524	50	18911	KRT8,SHTN1,KRT80,KRT18,PPL,BAIAP2,FAM83H,KRT15,AIF1L,MAP7,KLC3,KRT7,CEP170B,CTTN,KRT4,PLS1,WASL,PKP2,KIFC3,DNAH14,AURKA,KRT19,LMNA,DSP,NCKAP1,JUP,BFSP1,MISP,KIF21A,EVPL,HID1,COBL,EPPK1,PLEC,HOOK1,FHDC1,MTUS1,EIF6,MYO6,SVIL,RAC1,DST,ESPN,CARMIL1,CAMSAP3,FAM110C,MID2,KIF3B,GAS8,YES1
HPA	endometrium 2; glandular cells[‚â•Medium]	HPA:0170052	0.00133214	9.55204	2.87545	4618	2364	675	18911	TSPAN15,KIAA1522,KRT8,TUFT1,KRT18,BAIAP2L1,HSPA1A,HSPA1B,WWC1,PPL,DDR1,BAIAP2,TLCD1,PIP4K2C,PLEKHG3,PDGFB,RASEF,PRXL2A,MYO5B,EPCAM,SDC4,ARHGEF16,EPB41L1,F11R,WFDC2,PATJ,TNFRSF21,TSKU,AIF1L,MYH14,CYB561,TSPAN6,KIAA1671,SCNN1A,MAP7,VAPB,MET,SOWAHC,CGN,KRT7,EFNA5,CDH1,DSG2,CLDN1,CTTN,BCAP31,RCE1,FNBP1L,CARD10,JAG2,TACC2,ABCC3,CLMN,PTPN3,SSH3,GPRC5C,TSPAN1,PRPF6,TJP1,MPZL2,CMTM4,HM13,STAU1,RAP1GAP,PL…
TF	Factor: E2F-3:HES-7; motif: NNNSGCGCSNNNNNCRCGYGNN; match class: 1	TF:M08526_1	0.00133349	9.55058	2.87501	14304	415	371	18911	TSPAN15,KIAA1522,CTSV,LAMA5,KRT8,CELSR1,TUFT1,SHTN1,RIPK4,TMEM184A,KRT18,BAIAP2L1,EFNA1,RHPN2,HSPA1A,MLF1,HSPA1B,DDX27,WWC1,PPL,FAM241B,BAIAP2,ADGRG1,MAL2,TOM1L1,TLCD1,PLPP2,PIP4K2C,FAM83H,IGSF3,P2RY2,BCAM,PKP3,PLEKHG3,RAB5IF,PDGFB,RASEF,CCNJL,SPR,MYO5B,EEF1A2,EPCAM,SDC4,ARHGEF16,NHLRC1,EPB41L1,PAK4,GRB7,F11R,WFDC2,PTPRF,PATJ,TNFRSF21,WNT7B,TSKU,AIF1L,MYH14,ARHGAP39,CYB561,TSPAN6,PIGT,LAPTM4B,ANK…
HP	Abnormality of the nail	HP:0001597	0.00134202	9.54138	2.87224	410	3074	106	18911	RIPK4,ITGB4,PERP,CDH1,LAMB3,TFAP2A,LAMC2,DPM1,GRHL2,LMNA,DSP,JUP,KDF1,ITGA3,IRF6,LAMA3,EGFR,NECTIN4,PLEC,CARD14,NSDHL,DST,HOXC13,SULT2B1,GJB3,ZNF462,GTF2IRD1,KRT86,KRT17,LMX1B,KRT6A,FGFR2,ALG3,IL17RC,IL36RN,FERMT1,FZD6,SLCO2A1,KCTD1,KRT83,KRT81,KRT16,CAST,RNF13,PGAP3,COL17A1,KRT5,GJB2,SIK1,CD151,IFT43,NECTIN1,EDARADD,ECE1,PKP1,DLX3,WNT10A,ZMPSTE24,PIGO,AP1S3,GNAO1,ITGA6,FAM111B,NSUN2,WDR35,DOCK6,…
TF	Factor: Zbtb37; motif: NYACCGCRNTCACCGCR	TF:M12345	0.00137336	9.50807	2.86221	5297	2885	964	18911	TSPAN15,CTSV,LAMA5,KRT8,CELSR1,SHTN1,RIPK4,KRT80,KRT18,HSPA1A,MLF1,HSPA1B,WWC1,BAIAP2,TOM1L1,PIP4K2C,FAM83H,IGSF3,P2RY2,PKP3,PLEKHG3,CCNJL,PAK4,PTPRF,TNFRSF21,AIF1L,CYB561,LAPTM4B,ANKEF1,TFAP2C,LLGL2,FOXA1,KIAA1671,SCNN1A,MAP7,VWA1,IQANK1,VAPB,MET,MAP3K9,ACOT4,EFNA5,ST6GALNAC2,CPVL,PERP,TACSTD2,CDH1,TMEM30B,DSG2,TRIM47,SDC1,SLC25A13,CARD10,C1ORF56,WNT9A,JAG2,GET4,OVOL2,ATP1B1,CLMN,PTPN3,SSH3,TJP1…
GO:BP	regulation of cell projection assembly	GO:0060491	0.00141415	9.46585	2.8495	188	1025	29	18911	AGRN,TACSTD2,FNBP1L,RAP1GAP,WASL,KLF5,NCKAP1,PLEK2,OCLN,EPS8L1,COBL,EPHA2,F2RL1,CDC42EP4,RAC1,FAM110C,ANLN,EPS8L2,RDX,TBC1D30,PFN2,MAPK15,RAB17,MYO10,DMTN,PPP1R9A,YAP1,PLD1,EPS8
GO:BP	multicellular organismal water homeostasis	GO:0050891	0.00145286	9.42689	2.83778	76	177	8	18911	CLDN4,MYO5B,SCNN1A,MET,SFN,CLDN1,LSR,GRHL1
GO:BP	regulation of plasma membrane bounded cell projection organization	GO:0120035	0.00145755	9.42224	2.83638	636	1149	72	18911	SHTN1,EFNA1,MAP3K13,BAIAP2,PTPRF,AGRN,EFNA5,TACSTD2,FNBP1L,RAP1GAP,PLS1,WASL,KLF5,ID1,NCKAP1,SEMA4B,ITGA3,PLEK2,OCLN,RYK,EPS8L1,COBL,SEMA3E,PTK6,EPHA2,OBSL1,L1CAM,F2RL1,CDC42EP4,RAC1,CARMIL1,KLK6,SRCIN1,S100A9,ANLN,EPS8L2,RDX,CRABP2,TMEM106B,TBC1D30,KLK8,PFN2,SKIL,MDK,MARK1,PTK2,MAPK15,PLXNA1,NEDD4L,KIAA0319,NRCAM,RAB17,MYO10,KLF4,DMTN,MBOAT1,PPP1R9A,FSTL4,YAP1,EFNB2,PLD1,EPS8,CAMSAP2,EPHB2,CNTN1…
GO:BP	contractile actin filament bundle assembly	GO:0030038	0.00146532	9.41457	2.83407	106	535	15	18911	SDC4,F11R,MET,TACSTD2,TJP1,PPFIA1,LIMCH1,PXN,FHDC1,ARHGEF5,RAC1,CARMIL1,ITGB5,PHLDB2,S100A10
GO:BP	stress fiber assembly	GO:0043149	0.00146532	9.41457	2.83407	106	535	15	18911	SDC4,F11R,MET,TACSTD2,TJP1,PPFIA1,LIMCH1,PXN,FHDC1,ARHGEF5,RAC1,CARMIL1,ITGB5,PHLDB2,S100A10
GO:BP	bundle of His cell to Purkinje myocyte communication	GO:0086069	0.00148786	9.39255	2.82744	14	244	5	18911	DSG2,DSC2,PKP2,DSP,JUP
GO:BP	cellular component biogenesis	GO:0044085	0.00149381	9.38678	2.8257	3135	563	143	18911	LAMA5,KRT8,SHTN1,BAIAP2L1,HSPA1A,HSPA1B,DDX27,CLDN4,BAIAP2,TLCD1,PIP4K2C,PKP3,CHMP4C,RAB5IF,SDC4,GRB7,F11R,PATJ,AIF1L,ITGB4,CDS1,MET,PMEPA1,AGRN,EFNA5,HES1,TACSTD2,CDH1,LAMB3,CLDN9,CLDN1,CTTN,SDC1,FNBP1L,CARD10,SSH3,LSR,PRPF6,TGFA,TJP1,MARVELD3,SIX4,RAP1GAP,PLS1,REPS2,WASL,CLDN7,LAMC2,PKP2,VMP1,KLF5,MARVELD2,CTNND1,ADRM1,AURKA,SPIRE2,KRT19,GRHL2,ID1,DLG5,PLK2,NCKAP1,SYT7,JUP,PARD6B,PLEK2,MISP,SPT…
GO:BP	anatomical structure formation involved in morphogenesis	GO:0048646	0.00150138	9.3795	2.82351	1113	2289	206	18911	KRT8,CELSR1,EFNA1,ADGRG1,SDC4,PAK4,ITGB4,FOXA1,ITGB6,PERP,HES1,LAMB3,CARD10,OVOL2,TGFA,TJP1,SHB,SIX4,CAPN2,TFAP2A,KLF5,KRT19,GRHL2,ID1,PLK2,SPINT1,JUP,ITGA3,LAMA3,COBL,SEMA3E,EPHA2,OBSL1,NAXE,SPINT2,ALDH1A3,ANXA3,LFNG,ADGRG6,LAMB1,EMP2,ADAM15,HTATIP2,TNNT1,POFUT1,SCRIB,NECTIN2,ITGB5,PHLDB2,FOLR1,PDCD6,TNFRSF12A,TM4SF1,DAG1,ITGA2,IL18,AMOTL2,PTGFRN,ERBB2,NTF4,OPHN1,DUSP4,TNFAIP2,KLK5,ST14,MMP15,LH…
REAC	Apoptotic cleavage of cellular proteins	REAC:R-HSA-111465	0.00150408	9.3769	2.82273	37	327	7	18911	CDH1,DSG2,BCAP31,TJP1,DSP,OCLN,PLEC
GO:BP	appendage morphogenesis	GO:0035107	0.00152264	9.35921	2.8174	152	4969	68	18911	WNT9A,TFAP2A,GRHL2,LRP5,IQCE,ASPH,PBX1,CRABP2,FGFR2,TGFB2,FZD6,CYP26B1,HOXC10,WNT3,B9D1,FREM2,PLXNA2,HOXC11,SALL4,ECE1,SOX9,DKK1,SEMA3C,BMP7,WNT7A,GJA5,BMPR1B,FRAS1,HOXD10,FMN1,NIPBL,RARG,EXT1,DLX6,PITX1,PSEN1,MSX2,ZNF219,SP8,C2CD3,LRP6,BCL2L11,ZNF358,TP63,SHH,HOXD13,ALX1,ALDH1A2,GPC3,GNAS,MKS1,DYNC2H1,IFT52,FGF4,ALX4,CHD7,OSR2,RNF165,HOXD9,LMBR1,CPLANE1,FLVCR1,HOXA10,LRP4,GLI3,BMP4,NOTCH2,GNA12
GO:BP	limb morphogenesis	GO:0035108	0.00152264	9.35921	2.8174	152	4969	68	18911	WNT9A,TFAP2A,GRHL2,LRP5,IQCE,ASPH,PBX1,CRABP2,FGFR2,TGFB2,FZD6,CYP26B1,HOXC10,WNT3,B9D1,FREM2,PLXNA2,HOXC11,SALL4,ECE1,SOX9,DKK1,SEMA3C,BMP7,WNT7A,GJA5,BMPR1B,FRAS1,HOXD10,FMN1,NIPBL,RARG,EXT1,DLX6,PITX1,PSEN1,MSX2,ZNF219,SP8,C2CD3,LRP6,BCL2L11,ZNF358,TP63,SHH,HOXD13,ALX1,ALDH1A2,GPC3,GNAS,MKS1,DYNC2H1,IFT52,FGF4,ALX4,CHD7,OSR2,RNF165,HOXD9,LMBR1,CPLANE1,FLVCR1,HOXA10,LRP4,GLI3,BMP4,NOTCH2,GNA12
TF	Factor: LKLF; motif: NGGGCGG; match class: 1	TF:M05499_1	0.00160762	9.28086	2.79382	2424	350	84	18911	CELSR1,TUFT1,SHTN1,RIPK4,BAIAP2L1,RHPN2,HSPA1B,PPL,FAM83H,P2RY2,PKP3,RAB5IF,EEF1A2,ARHGEF16,GRB7,PATJ,TNFRSF21,WNT7B,TFAP2C,LLGL2,IQANK1,SOWAHC,C19ORF33,MAP3K9,ESRP2,ACOT4,SFN,ST6GALNAC2,CEP170B,TMEM30B,TMEM54,DSG2,TRIM47,CLDN9,BCAP31,RTL8A,RCE1,FNBP1L,CARD10,JAG2,GET4,SSH3,CDC42BPG,PRPF6,TGFA,TJP1,SHB,STAU1,SLC2A4RG,EPHX1,REPS2,VMP1,CITED4,B3GNT3,KRT19,YTHDF1,NANOS1,GPRC5A,CUEDC1,SEMA4B,PARD6B,A…
TF	Factor: KLF17; motif: NGGGCGG; match class: 1	TF:M05386_1	0.00160762	9.28086	2.79382	2424	350	84	18911	CELSR1,TUFT1,SHTN1,RIPK4,BAIAP2L1,RHPN2,HSPA1B,PPL,FAM83H,P2RY2,PKP3,RAB5IF,EEF1A2,ARHGEF16,GRB7,PATJ,TNFRSF21,WNT7B,TFAP2C,LLGL2,IQANK1,SOWAHC,C19ORF33,MAP3K9,ESRP2,ACOT4,SFN,ST6GALNAC2,CEP170B,TMEM30B,TMEM54,DSG2,TRIM47,CLDN9,BCAP31,RTL8A,RCE1,FNBP1L,CARD10,JAG2,GET4,SSH3,CDC42BPG,PRPF6,TGFA,TJP1,SHB,STAU1,SLC2A4RG,EPHX1,REPS2,VMP1,CITED4,B3GNT3,KRT19,YTHDF1,NANOS1,GPRC5A,CUEDC1,SEMA4B,PARD6B,A…
TF	Factor: BEN; motif: CAGCGRNV; match class: 1	TF:M01240_1	0.00167756	9.21942	2.77532	12643	3069	2272	18911	TSPAN15,KIAA1522,CTSV,LAMA5,CELSR1,TUFT1,SHTN1,RIPK4,TMEM184A,BAIAP2L1,EFNA1,RHPN2,SOX13,WWC1,PPL,FAM241B,BAIAP2,ADGRG1,MAL2,TOM1L1,TLCD1,PLPP2,PIP4K2C,FAM83H,IGSF3,P2RY2,BCAM,PKP3,CHMP4C,PLEKHG3,RAB5IF,PDGFB,RASEF,CCNJL,SPR,ELF3,MYO5B,EEF1A2,EPCAM,ARHGEF16,NHLRC1,PAK4,F11R,PTPRF,PATJ,TNFRSF21,WNT7B,AIF1L,MYH14,ARHGAP39,TSPAN6,PIGT,LAPTM4B,TFAP2C,ITGB4,CDS1,LLGL2,FOXA1,KIAA1671,B3GNT5,SCNN1A,MAP7…
GO:CC	cytoplasm	GO:0005737	0.00169872	9.20134	2.76988	11484	907	646	18911	TSPAN15,CTSV,KRT8,TUFT1,SHTN1,RIPK4,TMEM184A,KRT80,KRT18,BAIAP2L1,RHPN2,SOX13,HSPA1A,MLF1,HSPA1B,WWC1,PPL,MAP3K13,BAIAP2,MAL2,TOM1L1,PLPP2,PIP4K2C,FAM83H,PKP3,CHMP4C,RAB5IF,PDGFB,RASEF,PRXL2A,CCNJL,SPR,ELF3,MYO5B,EEF1A2,SDC4,ARHGEF16,NHLRC1,EPB41L1,PAK4,GRB7,F11R,PATJ,TNFRSF21,WNT7B,KRT15,AIF1L,MYH14,ARHGAP39,CYB561,PIGT,LAPTM4B,TFAP2C,SLC39A1,CDS1,LLGL2,B3GNT5,SCNN1A,MAP7,VWA1,ETNK2,KLC3,VAPB,C1…
GO:BP	regulation of establishment of planar polarity	GO:0090175	0.00174911	9.15916	2.75718	114	4921	54	18911	CELSR1,RYK,PSMA7,RAC1,PSMC4,PSMD4,CELSR2,FZD6,PSMD12,SMURF1,VANGL1,GRHL3,ARHGEF19,PSMA3,PSMD10,FZD5,SEM1,SAPCD2,DKK1,PSMB3,PSMC2,PSMD2,ANKRD6,WNT7A,PSMD11,SPEF1,DAAM1,VANGL2,JHY,PSMA2,ZNRF3,PSMB5,PSMC5,PSMF1,PSMB4,PSMC1,PKHD1,GPC3,DVL3,CELSR3,TIAM1,MKS1,PSMD3,PSMB7,PSMC6,AP2M1,WNT11,FZD7,PSMC3,PSME4,PSMB6,PSMA6,CLTC,FZD3
GO:BP	lung development	GO:0030324	0.0017634	9.14742	2.75365	181	326	15	18911	LAMA5,CELSR1,WNT7B,FOXA1,ITGB6,ESRP2,THRB,HES1,GRHL2,ID1,DLG5,ITGA3,ERRFI1,EGFR,LTBP3
TF	Factor: RREB-1; motif: GGGWCSA	TF:M05439	0.00176981	9.14219	2.75207	8276	3055	1532	18911	LAMA5,TUFT1,SHTN1,RIPK4,KRT80,EFNA1,DDX27,WWC1,PPL,MAP3K13,DDR1,FAM241B,BAIAP2,ADGRG1,TOM1L1,TLCD1,PLPP2,PIP4K2C,FAM83H,IGSF3,P2RY2,BCAM,PLEKHG3,RAB5IF,RASEF,CCNJL,ELF3,MYO5B,EEF1A2,SDC4,PTPRF,PATJ,AIF1L,ARHGAP39,CYB561,TSPAN6,PIGT,LAPTM4B,ANKEF1,TFAP2C,ITGB4,LLGL2,FOXA1,SCNN1A,MAP7,VWA1,ETNK2,IQANK1,KLC3,VAPB,TSPAN13,MET,SOWAHC,LYPD3,CGN,MAP3K9,PMEPA1,ESRP2,ESRP1,KRT7,AGRN,EFNA5,SFN,KIAA0895,YIP…
TF	Factor: PUR1; motif: GGGNCAGNN; match class: 1	TF:M01721_1	0.00177703	9.13631	2.7503	3279	3633	771	18911	TSPAN15,CTSV,BAIAP2L1,WWC1,FAM241B,IGSF3,P2RY2,PDGFB,PRXL2A,EEF1A2,NHLRC1,EPB41L1,WNT7B,KRT15,AIF1L,ITGB4,CDS1,LLGL2,SCNN1A,C19ORF33,ESRP2,AGRN,SFN,ST6GALNAC2,CEP170B,CDH1,TMEM54,S100A2,CLDN9,CTTN,BCAP31,SDC1,SLC25A13,ABCC3,CLMN,SSH3,TMPRSS13,CMTM4,SIX4,SLC2A4RG,PLEKHG6,MAB21L4,TFAP2A,PKP2,CITED4,TBC1D8,CDH3,SPIRE2,UPP1,NSUN7,NCKAP1,KDF1,PLEK2,MISP,TMEM40,ERBB3,NUDT14,GPR39,SEZ6L2,PROM2,STX1A,OCL…
TF	Factor: E2F-1; motif: NNNSSCGCSAANN; match class: 1	TF:M07250_1	0.00178242	9.13195	2.74899	5306	3111	1034	18911	LAMA5,TUFT1,SHTN1,RHPN2,PPL,TLCD1,FAM83H,IGSF3,PLEKHG3,RAB5IF,PDGFB,RASEF,CCNJL,EPCAM,PTPRF,TNFRSF21,WNT7B,AIF1L,LAPTM4B,ANKEF1,SLC39A1,CDS1,FOXA1,B3GNT5,VWA1,ETNK2,IQANK1,VAPB,TSPAN13,MET,SOWAHC,PCDH1,LYPD3,MAP3K9,ESRP2,ESRP1,ACOT4,AGRN,EFNA5,ST6GALNAC2,CEP170B,CDH1,TRIM47,EPN3,SDC1,CARD10,WNT9A,OVOL2,STYK1,CLMN,PTPN3,GPRC5C,PRPF6,TGFA,TJP1,CMTM4,GRAMD2A,SHB,MOCS3,DSC2,STAU1,SLC2A4RG,GRHL1,PPP1R…
REAC	Transport of small molecules	REAC:R-HSA-382551	0.0017967	9.12043	2.74552	718	4933	241	18911	MYO5B,SLC39A1,SCNN1A,ATP1B1,ABCC3,LSR,MB,SLC22A5,MCOLN3,SLC6A11,FXYD3,GNG4,PSMA7,SLC44A3,ATP9A,GNGT1,ASPH,SLC2A1,CLCN2,NIPAL1,PSMC4,SLC35A2,LRRC8E,RYR1,SLC46A1,ATP6V1B1,ATP6AP1,LCN2,ATP2C2,ANO1,PSMD4,NEDD4L,SLC2A8,DMTN,PDZD11,SLCO2A1,ABCB9,FTH1,PCSK6,SLC12A7,SLC29A2,STEAP3,PSMD12,SLC15A1,AQP3,GNG12,SLC25A10,SLC5A12,SLC4A3,ABCB6,SLC26A11,SLC50A1,ABCC2,ABCG2,SLC2A12,SLC6A14,LIPG,SLC9A2,LRRC8A,PSMA3…
GO:BP	axon development	GO:0061564	0.00180246	9.11582	2.74413	526	4953	190	18911	LAMA5,SHTN1,EFNA1,MAP3K13,DDR1,BAIAP2,GRB7,PTPRF,TNFRSF21,TSKU,EFNA5,CTTN,RAP1GAP,LAMC2,YTHDF1,SEMA4B,PARD6B,SPTBN2,LAMA3,RYK,COBL,IGSF9,SEMA3E,PARD3,EPHA2,L1CAM,RAC1,CTNNA1,APP,FOLR1,DAG1,LMTK2,ERBB2,OPHN1,CRABP2,B4GALT5,KLK8,ANK3,LHX1,SKIL,PLA2G10,PTK2,FGFR2,ARTN,PLXNA1,PIK3CB,KIAA0319,NRCAM,EPHA1,KLF4,NTN4,FSTL4,EFNB2,EPHB4,CAMSAP2,EPHB2,S100A6,SRC,SEMA6B,WNT3,SEMA4C,VSTM2L,ENAH,MAP2,PLXNB3,PL…
GO:BP	regulation of signaling	GO:0023051	0.00180928	9.11037	2.7425	3482	4481	974	18911	TSPAN15,BAIAP2L1,EFNA1,SOX13,HSPA1A,HSPA1B,WWC1,MAP3K13,BAIAP2,ADGRG1,PIP4K2C,PDGFB,ELF3,ARHGEF16,F11R,WNT7B,TSKU,ARHGAP39,TSPAN6,LLGL2,FOXA1,MET,MAP3K9,PMEPA1,STARD10,EFNA5,HES1,CDH1,CTTN,BCAP31,SYT12,WNT9A,JAG2,OVOL2,ATP1B1,PTPN3,TGFA,MARVELD3,STAU1,RAP1GAP,INHBB,MUC1,CTNND1,AURKA,CDH3,ID1,GPAT3,YTHDF1,DLG5,LMNA,GPRC5A,PLK2,GCNT2,SYT7,JUP,CACNG4,ITGA3,GIPC1,TRIM16,TPD52L1,ERBB3,SEZ6L2,ERRFI1,ST…
GO:BP	ear development	GO:0043583	0.0018116	9.10852	2.74194	229	4927	94	18911	CELSR1,DDR1,SDC4,ESRP1,HES1,JAG2,SIX4,PLS1,TFAP2A,MCOLN3,ALDH1A3,MYO6,ADGRV1,SCRIB,LRIG3,ATP6V1B1,FGFR2,SOX2,TGFB2,FZD6,SIX1,EPHB2,SLC9A3R1,EDN1,FREM2,GRHL3,ZIC1,JAG1,NTN1,GJB2,MYO7A,PSAP,ECE1,OTX1,LRTOMT,SHROOM2,HOXA2,STRA6,SOX9,DLL1,WHRN,USH1G,SIX2,MAFB,GJB6,HPN,EPHA4,CEBPD,SLITRK6,LHFPL5,VANGL2,NIPBL,GATA2,WNT3A,TMC1,TTC8,GABRB3,DLX6,EYA4,INSIG2,MYO3A,GATA3,DUOX2,TCAP,GBX2,OC90,MYCL,FOXI1,SLC2…
GO:BP	epithelial cell morphogenesis	GO:0003382	0.00181578	9.1052	2.74094	37	4509	23	18911	MET,GRHL2,ID1,CLDN3,SPINT2,RAB25,ST14,ARHGEF26,EPB41L5,COL18A1,FLNB,VSIG1,DACT2,RILPL1,PLOD3,PALLD,FRMD6,SIPA1L3,FAT1,COL22A1,PKHD1,POF1B,STC1
WP	Mammary gland development pathway - Pregnancy and lactation (Stage 3 of 4)	WP:WP2817	0.00188115	9.05417	2.72558	32	4787	20	18911	ERBB3,EGFR,ERBB2,ATP2C2,ELF5,BCL2L1,CEBPB,GJB2,GAL,PTPN1,CCND1,CAV1,PRLR,TTC9,PGR,PNCK,ESR1,TNFRSF11A,TNFSF11,CEBPA
TF	Factor: Egr-1; motif: NNCRCCCMCGCNN	TF:M12140	0.0019006	9.03933	2.72111	5156	3499	1123	18911	TSPAN15,KIAA1522,KRT8,KRT18,BAIAP2L1,HSPA1A,HSPA1B,WWC1,PPL,FAM241B,BAIAP2,MAL2,TLCD1,FAM83H,P2RY2,PKP3,PDGFB,RASEF,CCNJL,EEF1A2,SDC4,ARHGEF16,PAK4,GRB7,PTPRF,WNT7B,AIF1L,MYH14,CYB561,PIGT,ANKEF1,TFAP2C,CDS1,B3GNT5,VWA1,ETNK2,IQANK1,KLC3,SOWAHC,MAP3K9,ST6GALNAC2,CEP170B,CDH1,DSG2,CTTN,BCAP31,RTL8A,SDC1,SYT12,CARD10,WNT9A,JAG2,TACC2,ATP1B1,CLMN,PTPN3,SSH3,LSR,GPRC5C,CDC42BPG,PRPF6,TJP1,GRAMD2A,GRH…
GO:BP	positive regulation of cellular component biogenesis	GO:0044089	0.0019015	9.03864	2.7209	539	596	40	18911	BAIAP2L1,HSPA1A,HSPA1B,BAIAP2,PIP4K2C,SDC4,MET,AGRN,EFNA5,CLDN1,CTTN,SDC1,FNBP1L,WASL,SPIRE2,ID1,DLG5,NCKAP1,PLEK2,CLDN3,OCLN,EPS8L1,COBL,LIMCH1,PXN,EPHA2,ARPC1A,ARHGEF5,F2RL1,CDC42EP4,CLU,RAC1,CARMIL1,PHLDB2,CRB3,S100A10,PSMC4,ANLN,DAG1,EPS8L2
HP	Abnormality of dental enamel	HP:0000682	0.00191594	9.02773	2.71762	165	840	23	18911	FAM83H,ITGB4,ITGB6,LAMB3,CLDN1,LAMC2,GRHL2,LAMA3,NECTIN4,LTBP3,PLEC,ALDH3A2,OBSL1,GALNT3,ADGRV1,ESPN,DHCR7,GTF2IRD1,CNNM4,FGFR2,WDR72,IL17RC,OCRL
HP	Abnormal dermoepidermal junction morphology	HP:0031538	0.0019412	9.00883	2.71193	6	327	4	18911	LAMB3,LAMC2,LAMA3,PLEC
REAC	G alpha (12/13) signalling events	REAC:R-HSA-416482	0.00194777	9.00396	2.71046	80	3249	31	18911	ARHGEF16,GNG4,ARHGEF5,GNGT1,ARHGEF35,ECT2,ARHGEF37,GNG12,ARHGEF26,ARHGEF10L,VAV2,PLXNB1,ARHGEF19,KALRN,PLEKHG5,MCF2L,NGEF,RHOB,TRIO,NET1,ARHGEF17,ITSN1,FGD4,ARHGEF38,RHOC,ARHGEF12,ARHGEF3,ARHGEF4,ARHGEF33,ARHGEF39,ARHGEF11
GO:BP	hair follicle development	GO:0001942	0.00198257	8.97841	2.70277	90	2092	27	18911	LAMA5,CELSR1,CDH3,EGFR,NSDHL,HOXC13,KRT17,PLA2G10,FGFR2,TMEM79,TGFB2,FERMT1,FZD6,LGR4,SOX21,SPINK5,HPSE,FOXQ1,GAL,PDGFA,WNT10A,SOX9,ZMPSTE24,DKK1,NSUN2,FOXE1,CD109
GO:BP	sensory organ morphogenesis	GO:0090596	0.00198561	8.9762	2.70211	273	2400	64	18911	CELSR1,TSKU,THRB,WNT9A,SIX4,PLS1,TFAP2A,LRP5,EPHA2,OBSL1,GNGT1,ALDH1A3,MYO6,SCRIB,HOXC13,LRIG3,ATP6V1B1,LHX1,FGFR2,FJX1,FZD6,CYP26B1,SIX1,RDH13,EPHB2,BCAR3,SLC9A3R1,PRKCI,TSPAN12,EDN1,GRHL3,ZIC1,JAG1,NTN1,PPP2R3A,MYO7A,FZD5,NECTIN1,OTX1,SHROOM2,SDK1,HOXA2,STRA6,SOX9,DLL1,RP1,WHRN,FOXL2,BMP7,USH1G,RPGRIP1,SIX2,MAFB,GJB6,HPN,EFEMP1,SLITRK6,LHFPL5,VANGL2,NIPBL,GATA2,RARG,WNT3A,PAX6
TF	Factor: ZF5; motif: NGAGCGCGC; match class: 1	TF:M10111_1	0.00198986	8.97312	2.70118	486	1985	92	18911	IGSF3,PDGFB,MET,PCDH1,ACOT4,AGRN,ST6GALNAC2,PERP,TRIM47,RTL8A,SDC1,SLC25A13,GPRC5C,PPP1R26,NANOS1,BFSP1,CACNG4,RYK,SYT17,BARX2,LIMCH1,HES4,AGAP1,ALDH1A3,PLEKHA5,MLPH,MYO6,ADGRV1,SUSD4,PPIC,LRIG3,ZC2HC1C,ERBB2,AGAP3,ZNF462,EPB41L4B,PFN2,MMP15,PLCXD2,CRIP2,DHRS3,ANO1,SLC52A2,FGFR2,NAMPT,ARTN,ELFN2,NEDD4L,ANKRD9,KCNS3,CYP26B1,EPHB2,KLF3,HR,AHNAK2,MORC4,ARHGAP5,DUSP8,ACTL6A,CFAP206,GNAL,TFCP2L1,FRMD3…
GO:BP	respiratory system development	GO:0060541	0.00199205	8.97153	2.7007	208	326	16	18911	LAMA5,CELSR1,WNT7B,FOXA1,ITGB6,ESRP2,THRB,HES1,SIX4,GRHL2,ID1,DLG5,ITGA3,ERRFI1,EGFR,LTBP3
TF	Factor: BTEB4; motif: NCCACGCCCM	TF:M12186	0.00200801	8.96002	2.69724	8748	2378	1272	18911	TSPAN15,LAMA5,KRT8,CELSR1,TUFT1,SHTN1,TMEM184A,KRT18,BAIAP2L1,EFNA1,RHPN2,SOX13,DDX27,WWC1,PPL,DDR1,FAM241B,BAIAP2,MAL2,TLCD1,PLPP2,PIP4K2C,FAM83H,IGSF3,P2RY2,BCAM,PKP3,CHMP4C,RASEF,CCNJL,SPR,MYO5B,EEF1A2,EPCAM,SDC4,ARHGEF16,NHLRC1,EPB41L1,PAK4,GRB7,F11R,WFDC2,PTPRF,PATJ,TNFRSF21,KRT15,MYH14,PIGT,LAPTM4B,ANKEF1,TFAP2C,ITGB4,CDS1,LLGL2,B3GNT5,VWA1,IQANK1,KLC3,VAPB,TSPAN13,SOWAHC,PCDH1,C19ORF33,LYP…
TF	Factor: TCF-1; motif: ACATCGRGRCGCTGW	TF:M11601	0.00201205	8.95712	2.69636	14109	1071	908	18911	TSPAN15,KIAA1522,CTSV,LAMA5,KRT8,CELSR1,TUFT1,SHTN1,RIPK4,TMEM184A,KRT80,KRT18,BAIAP2L1,EFNA1,RHPN2,HSPA1A,MLF1,HSPA1B,DDX27,WWC1,PPL,DDR1,FAM241B,BAIAP2,ADGRG1,MAL2,TOM1L1,TLCD1,PLPP2,PIP4K2C,FAM83H,IGSF3,P2RY2,PKP3,CHMP4C,PLEKHG3,RAB5IF,PDGFB,RASEF,PRXL2A,CCNJL,SPR,ELF3,MYO5B,EEF1A2,EPCAM,SDC4,ARHGEF16,NHLRC1,EPB41L1,PAK4,GRB7,F11R,WFDC2,PTPRF,PATJ,TNFRSF21,WNT7B,KRT15,AIF1L,MYH14,ARHGAP39,CYB5…
GO:BP	regulation of cell migration	GO:0030334	0.00205918	8.92371	2.68631	896	1474	122	18911	LAMA5,SHTN1,EFNA1,CLDN4,ADGRG1,FAM83H,PDGFB,SDC4,GRB7,MET,TACSTD2,CDH1,CLDN1,CARD10,TJP1,MARVELD3,WASL,LAMC2,CXCL16,DLG5,LMNA,PLK2,GCNT2,SEMA4B,JUP,PARD6B,ITGA3,LAMA3,CLDN3,BCAR1,EGFR,OSGIN1,EPPK1,SEMA3E,LIMCH1,EPHA2,PTPRK,RAB25,DUSP3,MTUS1,F2RL1,ANXA3,LAMB1,EMP2,ADAM15,RHOD,SMIM22,RAC1,CARMIL1,CAMSAP3,FAM110C,S100A14,PHLDB2,APP,SRCIN1,PDCD6,DAG1,ITGA2,AMOTL2,PTPRU,RDX,AJUBA,EPB41L4B,PFN2,MDK,RIN…
GO:BP	Rho protein signal transduction	GO:0007266	0.00208506	8.9057	2.68088	137	635	18	18911	CELSR1,SHTN1,ADGRG1,F11R,MET,ITGA3,EPS8L1,ARHGAP29,F2RL1,CDC42EP4,RHOV,RHOD,RAC1,ARHGEF28,RTKN,EPS8L2,OPHN1,CNKSR1
GO:CC	cortical cytoskeleton	GO:0030863	0.00209431	8.89931	2.67896	112	637	18	18911	LLGL2,CDH1,CTTN,CAPN2,PLS1,WASL,KRT19,MISP,SPTBN2,COBL,MLPH,SLC2A1,PCLO,RTKN,DSTN,ANLN,MYZAP,RDX
GO:MF	structural molecule activity	GO:0005198	0.00210887	8.88932	2.67595	674	292	28	18911	LAMA5,TUFT1,KRT18,PPL,CLDN4,MAL2,EPB41L1,KRT15,MAP7,VWA1,AGRN,LAMB3,CLDN9,CLDN1,PLS1,CLDN7,LAMC2,KRT19,LMNA,DSP,LAD1,JUP,BFSP1,PANX2,SPTBN2,LAMA3,EVPL,CLDN3
WP	Alpha 6 Beta 4 signaling pathway	WP:WP244	0.00211033	8.88832	2.67565	33	453	7	18911	LAMA5,ITGB4,LAMB3,LAMC2,LAMA3,LAMB1,RAC1
GO:CC	bounding membrane of organelle	GO:0098588	0.00217366	8.84566	2.66281	2104	4922	667	18911	TSPAN15,TMEM184A,TOM1L1,PLPP2,CHMP4C,PDGFB,EEF1A2,WNT7B,CYB561,LAPTM4B,B3GNT5,SCNN1A,VAPB,PMEPA1,YIPF6,ST6GALNAC2,TMEM132A,AP1M2,EPN3,BCAP31,SYT12,CLMN,TSPAN1,TGFA,RAP1GAP,WASL,VMP1,B3GNT3,PRRG4,DSP,GCNT2,SYT7,SYS1,CACNG4,PROM2,STX1A,MCOLN3,MTARC1,OCLN,EGFR,HID1,CTSD,ALDH3A2,IQCE,STX3,GOLT1A,ATP9A,ANXA3,LFNG,CHMP4B,ARFGEF3,EMP2,ANXA8,RHOV,GALNT3,ASPH,MYO6,RHOD,DAGLA,RAC1,BTC,SLC2A1,RHOBTB3,ACSL3,…
GO:BP	extracellular matrix organization	GO:0030198	0.00218248	8.83981	2.66105	395	3503	113	18911	CTSV,LAMA5,DDR1,PDGFB,ELF3,F11R,ITGB4,VWA1,ITGB6,AGRN,CDH1,LAMB3,CAPN2,LAMC2,SPINT1,ITGA3,LAMA3,LTBP3,SPINT2,LAMB1,ADAM15,ITGB5,PHLDB2,APP,DAG1,ITGA2,CAV2,KLK5,MPZL3,MMP15,SERPINB5,PTK2,ITGB8,OLFML2A,WDR72,FOXC1,COL4A6,TGFB2,FERMT1,NTN4,CTSL,COL28A1,MMP7,NPNT,CST3,SPINK5,COL4A5,COL17A1,THSD4,CYP1B1,ITGAV,FGFR4,ST7,PDGFA,PAPLN,ADAMTS16,PHLDB1,SMOC1,LAMB2,SOX9,FBLN1,MMP9,ADAMTSL3,CAV1,ITGA6,P3H4,CA…
HPA	kidney; cells in tubules[‚â•Medium]	HPA:0270362	0.00223724	8.80406	2.65029	6156	2010	753	18911	KIAA1522,KRT8,KRT18,HSPA1A,WWC1,DDR1,BAIAP2,TLCD1,CHMP4C,PLEKHG3,PDGFB,PRXL2A,ELF3,MYO5B,EPCAM,SDC4,ARHGEF16,EPB41L1,F11R,PATJ,TNFRSF21,TSKU,AIF1L,TSPAN6,ANKEF1,KIAA1671,SCNN1A,MAP7,ETNK2,VAPB,MET,SOWAHC,PCDH1,CGN,ACOT4,KRT7,AGRN,EFNA5,CPVL,CDH1,LAMB3,S100A2,DSG2,EPN3,CLDN1,CTTN,BCAP31,RCE1,SDC1,FNBP1L,SLC25A13,CARD10,JAG2,SLPI,TACC2,ATP1B1,ABCC3,CLMN,PTPN3,SSH3,GPRC5C,TSPAN1,PRPF6,TGFA,MPZL2,CMT…
KEGG	Leukocyte transendothelial migration	KEGG:04670	0.00224604	8.7984	2.64858	114	1152	20	18911	CLDN4,F11R,CLDN9,CLDN1,CLDN7,CTNND1,CLDN3,OCLN,BCAR1,PXN,RAC1,CTNNA1,PTK2,PIK3CB,CLDN8,AFDN,CLDN23,CLDN10,ACTN4,ARHGAP5
GO:BP	regulation of small GTPase mediated signal transduction	GO:0051056	0.00230978	8.75803	2.63643	329	2517	76	18911	ADGRG1,ARHGEF16,F11R,ARHGAP39,MET,RAP1GAP,ITGA3,EPS8L1,ARHGAP8,ARHGAP29,ARHGEF5,F2RL1,ARFGEF3,RHOV,RHOD,RAC1,TNK1,ECT2,CADM4,SQSTM1,ARHGEF28,ARHGAP32,EPS8L2,OPHN1,RDX,SYDE2,ARAP3,PIK3CB,OCRL,TGFB2,EPS8,EPHB2,SRC,ARHGEF26,ARHGAP5,RGL2,DAB2IP,ARHGAP40,ARFGEF2,CGNL1,VAV2,ARHGAP42,RAC3,ARHGEF19,PLCE1,KALRN,SIPA1L2,PLEKHG5,MCF2L,FAM49B,NGEF,ARHGAP12,RALGAPB,RTN4R,TNFAIP1,APOE,KITLG,RHOB,CHN2,TRIO,NRP1…
HP	Nail dysplasia	HP:0002164	0.0023178	8.75303	2.63492	148	2782	45	18911	RIPK4,ITGB4,LAMB3,TFAP2A,LAMC2,DPM1,DSP,LAMA3,PLEC,HOXC13,KRT86,KRT17,LMX1B,KRT6A,ALG3,IL17RC,FERMT1,FZD6,KCTD1,KRT83,KRT81,KRT16,RNF13,COL17A1,KRT5,GJB2,IFT43,NECTIN1,EDARADD,ECE1,WNT10A,ITGA6,FAM111B,WDR35,WNT7A,GJB6,ATP2A2,SLC39A4,SLURP1,CPLX1,CLEC7A,NXN,TRPS1,PLOD3,KRT6B
GO:BP	respiratory tube development	GO:0030323	0.00231797	8.75292	2.63489	185	326	15	18911	LAMA5,CELSR1,WNT7B,FOXA1,ITGB6,ESRP2,THRB,HES1,GRHL2,ID1,DLG5,ITGA3,ERRFI1,EGFR,LTBP3
GO:BP	salivary gland morphogenesis	GO:0007435	0.00235915	8.72752	2.62724	33	2400	16	18911	LAMA5,ESRP2,EGFR,DAG1,FGFR2,PLXNA1,TGFB2,NTN4,TGM2,NFIB,SEMA3A,PDGFA,SEMA3C,BMP7,NRP1,PAX6
HP	Aplasia cutis congenita	HP:0001057	0.00236547	8.72366	2.62608	34	327	7	18911	ITGB4,LAMB3,TFAP2A,LAMC2,DSP,LAMA3,PLEC
TF	Factor: AP-2gamma; motif: NSCCYNNRGSN	TF:M11482	0.00238218	8.7135	2.62303	6436	2376	959	18911	KIAA1522,CELSR1,TMEM184A,KRT80,RHPN2,PPL,MAP3K13,FAM241B,BAIAP2,ADGRG1,MAL2,PLPP2,FAM83H,IGSF3,BCAM,CHMP4C,RAB5IF,PDGFB,MYO5B,EEF1A2,EPCAM,ARHGEF16,GRB7,PTPRF,PATJ,WNT7B,KRT15,TSKU,MYH14,CYB561,TFAP2C,LLGL2,FOXA1,KIAA1671,B3GNT5,ETNK2,IQANK1,KLC3,VAPB,TSPAN13,MET,SOWAHC,PCDH1,LYPD3,MAP3K9,ACOT4,KRT7,AGRN,EFNA5,SFN,CEP170B,TACSTD2,LAMB3,CLDN9,CTTN,BCAP31,SDC1,CARD10,WNT9A,C6ORF141,JAG2,SLPI,TACC2,…
GO:BP	establishment of planar polarity	GO:0001736	0.00239962	8.70298	2.61986	129	4921	59	18911	CELSR1,RYK,PSMA7,RAC1,PSMC4,PSMD4,CELSR2,FZD6,PSMD12,SMURF1,VANGL1,GRHL3,ARHGEF19,PSMA3,PSMD10,FZD5,SEM1,SAPCD2,DKK1,BRSK2,PSMB3,PSMC2,PSMD2,ANKRD6,WNT7A,PSMD11,SPEF1,DLG3,DAAM1,VANGL2,JHY,TTC8,PSMA2,ZNRF3,PSMB5,PSMC5,PSMF1,PSMB4,PSMC1,TP63,PKHD1,GPC3,DVL3,CELSR3,TIAM1,MKS1,PSMD3,PSMB7,PSMC6,AP2M1,WNT11,FZD7,CPLANE1,PSMC3,PSME4,PSMB6,PSMA6,CLTC,FZD3
GO:BP	establishment of tissue polarity	GO:0007164	0.00239962	8.70298	2.61986	129	4921	59	18911	CELSR1,RYK,PSMA7,RAC1,PSMC4,PSMD4,CELSR2,FZD6,PSMD12,SMURF1,VANGL1,GRHL3,ARHGEF19,PSMA3,PSMD10,FZD5,SEM1,SAPCD2,DKK1,BRSK2,PSMB3,PSMC2,PSMD2,ANKRD6,WNT7A,PSMD11,SPEF1,DLG3,DAAM1,VANGL2,JHY,TTC8,PSMA2,ZNRF3,PSMB5,PSMC5,PSMF1,PSMB4,PSMC1,TP63,PKHD1,GPC3,DVL3,CELSR3,TIAM1,MKS1,PSMD3,PSMB7,PSMC6,AP2M1,WNT11,FZD7,CPLANE1,PSMC3,PSME4,PSMB6,PSMA6,CLTC,FZD3
TF	Factor: Churchill; motif: CGGGNN	TF:M00986	0.00241327	8.6948	2.61739	13558	1614	1299	18911	TSPAN15,KIAA1522,CTSV,LAMA5,KRT8,CELSR1,TUFT1,SHTN1,RIPK4,TMEM184A,KRT80,KRT18,BAIAP2L1,EFNA1,RHPN2,HSPA1A,HSPA1B,WWC1,PPL,MAP3K13,CLDN4,FAM241B,BAIAP2,MAL2,TOM1L1,TLCD1,PLPP2,PIP4K2C,FAM83H,IGSF3,P2RY2,BCAM,PKP3,CHMP4C,PLEKHG3,PDGFB,RASEF,CCNJL,SPR,MYO5B,EEF1A2,EPCAM,SDC4,ARHGEF16,NHLRC1,PAK4,GRB7,WFDC2,PTPRF,PATJ,TNFRSF21,WNT7B,TSKU,AIF1L,MYH14,ARHGAP39,CYB561,TSPAN6,LAPTM4B,ANKEF1,TFAP2C,SLC39…
HP	Cheilitis	HP:0100825	0.00241683	8.69267	2.61675	17	1072	8	18911	SLC46A1,KRT17,KRT6A,IL17RC,OCRL,FERMT1,KRT16,CAST
GO:BP	extracellular structure organization	GO:0043062	0.00249551	8.64645	2.60284	396	3503	113	18911	CTSV,LAMA5,DDR1,PDGFB,ELF3,F11R,ITGB4,VWA1,ITGB6,AGRN,CDH1,LAMB3,CAPN2,LAMC2,SPINT1,ITGA3,LAMA3,LTBP3,SPINT2,LAMB1,ADAM15,ITGB5,PHLDB2,APP,DAG1,ITGA2,CAV2,KLK5,MPZL3,MMP15,SERPINB5,PTK2,ITGB8,OLFML2A,WDR72,FOXC1,COL4A6,TGFB2,FERMT1,NTN4,CTSL,COL28A1,MMP7,NPNT,CST3,SPINK5,COL4A5,COL17A1,THSD4,CYP1B1,ITGAV,FGFR4,ST7,PDGFA,PAPLN,ADAMTS16,PHLDB1,SMOC1,LAMB2,SOX9,FBLN1,MMP9,ADAMTSL3,CAV1,ITGA6,P3H4,CA…
TF	Factor: KLF; motif: GGGNGGGG	TF:M07461	0.00254471	8.61828	2.59436	8334	1520	804	18911	TSPAN15,KIAA1522,LAMA5,KRT8,CELSR1,TUFT1,SHTN1,KRT80,KRT18,EFNA1,SOX13,HSPA1A,HSPA1B,PPL,MAP3K13,DDR1,FAM241B,ADGRG1,PLPP2,PIP4K2C,FAM83H,IGSF3,P2RY2,BCAM,PKP3,PDGFB,MYO5B,EEF1A2,ARHGEF16,NHLRC1,EPB41L1,GRB7,F11R,WFDC2,PTPRF,TNFRSF21,KRT15,TSPAN6,SLC39A1,ITGB4,CDS1,LLGL2,KIAA1671,SCNN1A,VWA1,ETNK2,IQANK1,KLC3,VAPB,TSPAN13,PCDH1,C19ORF33,CGN,MAP3K9,ESRP1,AGRN,EFNA5,SFN,ST6GALNAC2,CPVL,PERP,TMEM132…
TF	Factor: GKLF; motif: WGGGYGKGGC	TF:M09971	0.00255311	8.61353	2.59293	5290	3364	1116	18911	TSPAN15,CTSV,LAMA5,KRT8,TUFT1,SHTN1,RIPK4,KRT80,KRT18,BAIAP2L1,EFNA1,PPL,MAP3K13,DDR1,TOM1L1,IGSF3,P2RY2,BCAM,PKP3,PDGFB,EEF1A2,PAK4,GRB7,F11R,WFDC2,WNT7B,KRT15,CYB561,ITGB4,CDS1,VWA1,ETNK2,KLC3,TSPAN13,MET,SOWAHC,PCDH1,C19ORF33,ESRP1,AGRN,SFN,ST6GALNAC2,CPVL,CEP170B,TMEM54,LAMB3,DSG2,TRIM47,EPN3,CLDN9,BCAP31,PRSS22,SDC1,CARD10,WNT9A,C6ORF141,JAG2,SLPI,STYK1,ATP1B1,CLMN,GPRC5C,TSPAN1,PRPF6,TGFA,C…
GO:BP	regulation of catalytic activity	GO:0050790	0.00261747	8.57761	2.58212	2349	968	175	18911	EFNA1,HSPA1A,MAP3K13,DDR1,CLDN4,TOM1L1,PDGFB,CCNJL,SPR,EEF1A2,SDC4,ARHGEF16,NHLRC1,PAK4,F11R,WFDC2,WNT7B,ARHGAP39,LLGL2,MET,MAP3K9,AGRN,EFNA5,SFN,PERP,BCAP31,PRSS22,CARD10,WNT9A,SLPI,ATP1B1,GPRC5C,TGFA,RGL3,PPP1R26,RAP1GAP,PLEKHG6,EGLN3,WASL,TBC1D8,ADRM1,CDH3,GRHL2,GPRC5A,GPR87,SPINT1,WFDC3,TPD52L1,SPTSSB,ERBB3,ERRFI1,PROM2,RASAL2,POR,PCSK1N,CLDN3,EGFR,LRP5,RYK,CTSD,PFKFB2,PTK6,ANXA8L1,CARD14,EPH…
GO:BP	regulation of protein tyrosine kinase activity	GO:0061097	0.00272752	8.5182	2.56423	94	858	17	18911	EFNA1,PDGFB,TGFA,GPRC5A,ERBB3,ERRFI1,PTK6,BTC,CD24,APP,SRCIN1,AFAP1L2,GPRC5B,AREG,CBLC,ZGPAT,DOK7
GO:CC	intercalated disc	GO:0014704	0.00276987	8.49597	2.55754	53	467	11	18911	DSG2,ATP1B1,TJP1,DSC2,PKP2,DSP,JUP,OBSL1,CXADR,CTNNA1,SLC2A1
GO:CC	intrinsic component of membrane	GO:0031224	0.00277616	8.49269	2.55656	5553	2908	1024	18911	TSPAN15,CELSR1,TMEM184A,EFNA1,DDR1,CLDN4,FAM241B,ADGRG1,MAL2,TLCD1,PLPP2,IGSF3,P2RY2,BCAM,RAB5IF,EPCAM,SDC4,F11R,PTPRF,TNFRSF21,CYB561,TSPAN6,PIGT,LAPTM4B,SLC39A1,ITGB4,CDS1,B3GNT5,SCNN1A,VAPB,TSPAN13,MET,PCDH1,LYPD3,ITGB6,PMEPA1,AGRN,EFNA5,YIPF6,ST6GALNAC2,PERP,TMEM132A,TACSTD2,CDH1,TMEM30B,TMEM54,DSG2,CLDN9,CLDN1,CTTN,BCAP31,RCE1,SDC1,SYT12,SLC25A13,JAG2,STYK1,ATP1B1,ABCC3,CLMN,LSR,TMPRSS13,GPR…
KEGG	Human papillomavirus infection	KEGG:05165	0.00278781	8.48665	2.55474	325	527	24	18911	LAMA5,PATJ,WNT7B,ITGB4,LLGL2,ITGB6,HES1,LAMB3,BCAP31,WNT9A,LAMC2,PARD6B,ITGA3,LAMA3,EGFR,PARD3,HES4,PXN,LFNG,LAMB1,SCRIB,ITGB5,PRKCZ,CRB3
GO:BP	regulation of cell communication	GO:0010646	0.00279131	8.48484	2.55419	3446	4486	964	18911	TSPAN15,BAIAP2L1,EFNA1,SOX13,HSPA1A,HSPA1B,WWC1,MAP3K13,BAIAP2,ADGRG1,PIP4K2C,PDGFB,ELF3,ARHGEF16,F11R,WNT7B,TSKU,ARHGAP39,TSPAN6,LLGL2,FOXA1,MET,MAP3K9,PMEPA1,STARD10,EFNA5,HES1,CDH1,CTTN,BCAP31,SYT12,WNT9A,JAG2,OVOL2,PTPN3,TGFA,MARVELD3,STAU1,RAP1GAP,INHBB,MUC1,CTNND1,AURKA,CDH3,ID1,GPAT3,YTHDF1,DLG5,LMNA,GPRC5A,PLK2,GCNT2,SYT7,JUP,CACNG4,ITGA3,GIPC1,TRIM16,TPD52L1,ERBB3,SEZ6L2,ERRFI1,STX1A,POR…
GO:BP	embryonic placenta development	GO:0001892	0.00297757	8.39165	2.52614	91	1976	26	18911	KRT8,PDGFB,WNT7B,HES1,OVOL2,KRT19,GRHL2,SPINT1,EGFR,NSDHL,SPINT2,ST14,PHLDA2,FGFR2,PLCD3,NR2F2,STK3,SOX15,CEBPB,FZD5,GJB5,MDFI,EPAS1,SENP2,BMP7,CYR61
GO:BP	retinoid metabolic process	GO:0001523	0.00299039	8.38545	2.52427	102	4932	51	18911	SDC4,AGRN,SDC1,ALDH1A3,CYP1A1,CRABP2,SDR16C5,DHRS3,RBP1,CYP26B1,AKR1B10,RDH13,CYP2S1,AKR1B15,AKR1C3,CYP1B1,GPC1,CYP26C1,STRA6,LRAT,ABCA4,DGAT2,APOE,LRP2,AKR1C1,SDC3,ADH7,PNPLA4,CYP27C1,DHRS9,CYP26A1,BCO1,HSPG2,RDH12,CYP2C8,CRABP1,AKR1C4,LPL,ALDH1A2,RDH11,GPC3,CYP1A2,BCO2,RBP4,RHO,CYP3A5,PLB1,RDH16,CLPS,NAPEPLD,GPC5
HPA	prostate; glandular cells[‚â•Medium]	HPA:0390052	0.00300747	8.37723	2.5218	4582	706	223	18911	TSPAN15,KIAA1522,KRT8,KRT18,BAIAP2L1,HSPA1A,HSPA1B,WWC1,PPL,DDR1,CLDN4,BAIAP2,PDGFB,RASEF,MYO5B,SDC4,ARHGEF16,GRB7,F11R,WFDC2,TNFRSF21,KRT15,TSKU,CYB561,TSPAN6,FOXA1,KIAA1671,SCNN1A,MAP7,VAPB,SOWAHC,PCDH1,CGN,KRT7,EFNA5,CDH1,DSG2,CLDN1,CTTN,BCAP31,RCE1,FNBP1L,CARD10,JAG2,TACC2,STYK1,CLMN,PTPN3,GPRC5C,TSPAN1,TGFA,MPZL2,CMTM4,MIPOL1,DSC2,HM13,STAU1,RAP1GAP,WASL,CLDN7,VMP1,KLF5,DPM1,G6PD,CTNND1,ADRM…
KEGG	Lysosome	KEGG:04142	0.00300798	8.37699	2.52172	128	3926	47	18911	CTSV,LAPTM4B,AP1M2,CTSD,ATP6AP1,FUCA2,ABCB9,CTSL,PPT1,CTSH,LITAF,ACP2,PSAP,SORT1,ATP6V0A4,CTSA,AP1S3,LGMN,NPC2,GBA,LAPTM4A,AP3B2,GAA,CTSF,NEU1,ATP6V0A1,CD63,SGSH,LAMP3,CLTB,LAMP1,SCARB2,LAMP2,GUSB,GNS,IDS,CTSZ,SLC11A2,PSAPL1,AP4S1,FUCA1,NPC1,CTSC,AP1S1,SUMF1,ATP6V0D2,GALNS
GO:BP	regulation of developmental process	GO:0050793	0.00303728	8.363	2.51752	2468	1505	274	18911	CTSV,LAMA5,CELSR1,SHTN1,EFNA1,SOX13,HSPA1A,HSPA1B,WWC1,MAP3K13,CLDN4,BAIAP2,PDGFB,PRXL2A,PAK4,F11R,PTPRF,TNFRSF21,WNT7B,MYH14,CDS1,FOXA1,ESRP1,THRB,AGRN,EFNA5,SFN,HES1,TACSTD2,CTTN,WNT9A,OVOL2,TJP1,SIX4,GRHL1,RAP1GAP,CAPN2,PLS1,TFAP2A,PKP2,KLF5,G6PD,AURKA,CDH3,GRHL2,ID1,DLG5,LMNA,PLK2,GCNT2,SPINT1,SEMA4B,JUP,KDF1,RASSF10,TRIM16,ERBB3,LAMA3,ERRFI1,POR,CLDN3,EGFR,LRP5,RYK,SYT17,COBL,EPPK1,SEMA3E,HM…
GO:BP	endomembrane system organization	GO:0010256	0.00304891	8.35749	2.51586	466	726	41	18911	SHTN1,BAIAP2L1,BAIAP2,TLCD1,CHMP4C,LAPTM4B,VAPB,FNBP1L,GET4,GRAMD2A,WASL,VMP1,KIFC3,LMNA,SYT7,SPTSSB,DMKN,ANXA8L1,HOOK1,OBSL1,FHDC1,OSBPL2,PACSIN3,FAM174B,CHMP4B,ANXA8,CLU,CAMSAP3,NECTIN2,S100A9,SQSTM1,PLSCR1,VPS37C,SYNGR2,FA2H,CAV2,SUN1,ALS2CL,RAB22A,ANK3,NUP155
HP	Decreased fertility in females	HP:0000868	0.00313715	8.31633	2.50346	83	3884	36	18911	POR,C11ORF80,GAS8,SPAG1,DNAH5,CCNO,TRIP13,TTC12,MCIDAS,CCDC40,CCDC103,BSCL2,DNAAF5,SOX9,FOXJ1,NR0B1,AGPAT2,FOXL2,CFAP300,GATA4,HYDIN,CCDC151,DNAL1,DNAAF3,RSPH1,CFAP221,DNAI1,RSPH3,DMRT3,TUBB8,PGR,DNAAF4,DNAJB13,SPEF2,CDH23,DRC1
CORUM	PA700-20S-PA28 complex	CORUM:193	0.00319668	8.28921	2.4953	36	4866	21	18911	PSMA7,PSMC4,PSMD4,PSMD12,PSMA3,PSMD10,PSMB3,PSMC2,PSMD2,PSMD11,PSMA2,PSMB5,PSMC5,PSMB4,PSMC1,PSMD3,PSMB7,PSMC6,PSMC3,PSMB6,PSMA6
GO:BP	hair cycle process	GO:0022405	0.00319984	8.28778	2.49487	92	2092	27	18911	LAMA5,CELSR1,CDH3,EGFR,NSDHL,HOXC13,KRT17,PLA2G10,FGFR2,TMEM79,TGFB2,FERMT1,FZD6,LGR4,SOX21,SPINK5,HPSE,FOXQ1,GAL,PDGFA,WNT10A,SOX9,ZMPSTE24,DKK1,NSUN2,FOXE1,CD109
GO:BP	molting cycle process	GO:0022404	0.00319984	8.28778	2.49487	92	2092	27	18911	LAMA5,CELSR1,CDH3,EGFR,NSDHL,HOXC13,KRT17,PLA2G10,FGFR2,TMEM79,TGFB2,FERMT1,FZD6,LGR4,SOX21,SPINK5,HPSE,FOXQ1,GAL,PDGFA,WNT10A,SOX9,ZMPSTE24,DKK1,NSUN2,FOXE1,CD109
TF	Factor: Egr-1; motif: NNNNGCGKGGGYGGNRN; match class: 1	TF:M09897_1	0.00333419	8.22845	2.47701	965	524	58	18911	KRT8,KRT18,BAIAP2L1,BAIAP2,FAM83H,P2RY2,EEF1A2,ANKEF1,IQANK1,AGRN,BCAP31,FNBP1L,CARD10,JAG2,ATP1B1,CLMN,CDC42BPG,TJP1,GRHL1,RAP1GAP,REPS2,PKP2,G6PD,SPINT1,KDF1,PARD6B,PANX2,ABHD11,PLEKHA7,POR,RYK,HID1,IL13RA1,MRGBP,LTBP3,PARD3,SERTAD4,LRRC1,GRTP1,HOOK1,GNG4,OSBPL2,CXADR,ATP9A,TDRKH,CCDC85C,CDC42BPB,PBX1,SRXN1,FAM110C,CYP1A1,RASSF7,SCRIB,MID2,ZDHHC9,TEAD3,ME1,YES1
GO:BP	Notch signaling pathway	GO:0007219	0.00334848	8.22228	2.47515	192	1209	32	18911	TSPAN15,WWC1,ELF3,LLGL2,FOXA1,PERP,HES1,JAG2,OVOL2,KRT19,EGFR,LFNG,PBX1,POFUT1,APP,ITCH,PSEN2,DLK2,MDK,TCIM,SLC35C2,FOXC1,TGFB2,PSENEN,YAP1,GALNT11,CNTN1,SRC,EPN2,PRKCI,CD46,MESP1
GO:BP	water homeostasis	GO:0030104	0.00341076	8.19569	2.46715	85	177	8	18911	CLDN4,MYO5B,SCNN1A,MET,SFN,CLDN1,LSR,GRHL1
GO:BP	regulation of plasma membrane bounded cell projection assembly	GO:0120032	0.00364367	8.10039	2.43846	186	1025	28	18911	AGRN,TACSTD2,FNBP1L,RAP1GAP,WASL,KLF5,NCKAP1,PLEK2,OCLN,EPS8L1,COBL,EPHA2,F2RL1,CDC42EP4,RAC1,ANLN,EPS8L2,RDX,TBC1D30,PFN2,MAPK15,RAB17,MYO10,DMTN,PPP1R9A,YAP1,PLD1,EPS8
TF	Factor: E2F-1; motif: WWTGGCGCCAAA	TF:M04515	0.00369608	8.07979	2.43226	12751	1870	1416	18911	KIAA1522,CTSV,LAMA5,KRT8,CELSR1,TUFT1,SHTN1,RIPK4,TMEM184A,KRT18,EFNA1,RHPN2,HSPA1A,HSPA1B,DDX27,WWC1,PPL,MAP3K13,CLDN4,FAM241B,BAIAP2,MAL2,TOM1L1,TLCD1,PLPP2,PIP4K2C,FAM83H,IGSF3,P2RY2,PKP3,CHMP4C,PLEKHG3,RAB5IF,PDGFB,RASEF,CCNJL,SPR,MYO5B,EEF1A2,EPCAM,SDC4,ARHGEF16,NHLRC1,PAK4,F11R,WFDC2,PTPRF,PATJ,TNFRSF21,WNT7B,AIF1L,MYH14,ARHGAP39,CYB561,TSPAN6,LAPTM4B,ANKEF1,TFAP2C,SLC39A1,ITGB4,CDS1,LLGL2,…
TF	Factor: EGR-1; motif: TGCGTGGGCGK	TF:M01972	0.00372262	8.06947	2.42915	5157	3499	1120	18911	TSPAN15,KIAA1522,KRT8,SHTN1,KRT18,HSPA1A,HSPA1B,WWC1,BAIAP2,MAL2,TLCD1,PLPP2,FAM83H,PKP3,RAB5IF,PDGFB,RASEF,CCNJL,EEF1A2,SDC4,ARHGEF16,PAK4,PTPRF,AIF1L,MYH14,CYB561,PIGT,ANKEF1,TFAP2C,CDS1,B3GNT5,VWA1,PON3,ETNK2,IQANK1,KLC3,MET,SOWAHC,PCDH1,MAP3K9,CEP170B,CDH1,DSG2,CTTN,BCAP31,RTL8A,SDC1,SYT12,CARD10,WNT9A,JAG2,TACC2,ATP1B1,CLMN,PTPN3,SSH3,GPRC5C,CDC42BPG,PRPF6,TJP1,GRAMD2A,SLC2A4RG,GRHL1,PPP1R26…
TF	Factor: NGFI-C; motif: WTGCGTGGGYGG	TF:M00244	0.0037644	8.05336	2.4243	5946	3374	1235	18911	TSPAN15,KIAA1522,KRT8,CELSR1,KRT18,BAIAP2L1,HSPA1A,HSPA1B,DDX27,WWC1,PPL,MAP3K13,BAIAP2,MAL2,TOM1L1,TLCD1,PLPP2,FAM83H,PKP3,PDGFB,RASEF,CCNJL,ELF3,EEF1A2,SDC4,ARHGEF16,PAK4,TNFRSF21,KRT15,TSKU,AIF1L,MYH14,CYB561,PIGT,ANKEF1,TFAP2C,CDS1,LLGL2,B3GNT5,VWA1,ETNK2,IQANK1,KLC3,SOWAHC,MAP3K9,ACOT4,AGRN,EFNA5,ST6GALNAC2,CEP170B,CDH1,DSG2,CTTN,RTL8A,SDC1,SYT12,FNBP1L,CARD10,WNT9A,JAG2,SLPI,TACC2,ATP1B1,AB…
GO:BP	dichotomous subdivision of an epithelial terminal unit	GO:0060600	0.00377542	8.04915	2.42303	10	2280	8	18911	CELSR1,AREG,PLXNA1,CTSH,SEMA3A,SEMA3C,NRP1,VANGL2
GO:BP	cell-cell junction maintenance	GO:0045217	0.00379197	8.04284	2.42114	16	476	6	18911	TJP1,KIFC3,PLEKHA7,INAVA,F2RL1,CAMSAP3
TF	Factor: Egr; motif: GTGGGSGCRRS	TF:M00807	0.00381709	8.03331	2.41827	4169	2988	799	18911	TSPAN15,CTSV,CELSR1,TMEM184A,KRT80,BAIAP2L1,RHPN2,PPL,FAM241B,BAIAP2,MAL2,PLPP2,FAM83H,PDGFB,RASEF,PRXL2A,SPR,ARHGEF16,PAK4,GRB7,WFDC2,PTPRF,PATJ,WNT7B,ARHGAP39,CYB561,TFAP2C,LLGL2,SCNN1A,ETNK2,IQANK1,MET,SOWAHC,PCDH1,C19ORF33,LYPD3,STARD10,YIPF6,TMEM132A,CEP170B,CDH1,LAMB3,SYT12,FNBP1L,SLC25A13,WNT9A,JAG2,TACC2,ATP1B1,ABCC3,CLMN,PTPN3,TMPRSS13,CDC42BPG,TJP1,CMTM4,SHB,RGL3,GRHL1,INHBB,CLDN7,PKP2,…
GO:CC	Golgi apparatus subcompartment	GO:0098791	0.00387907	8.01007	2.41127	861	4105	258	18911	TOM1L1,PDGFB,B3GNT5,VAPB,PMEPA1,YIPF6,ST6GALNAC2,TMEM132A,CDH1,AP1M2,BCAP31,TGFA,RAP1GAP,B3GNT3,GCNT2,SYS1,PCSK1N,EGFR,HID1,SYT17,GOLT1A,ATP9A,LFNG,EMP2,GALNT3,RAC1,SLC2A1,RHOBTB3,DPY30,ZDHHC9,B3GALNT1,APP,DHCR24,FOLR1,PDCD6,SLC35A2,ARHGAP32,MALL,ERGIC3,CAV2,PSEN2,CLBA1,B4GALT5,HS6ST2,TFG,GOLGA7B,SLC35B1,MGAT5B,AREG,ATP2C2,YIF1A,STEAP4,SERPINA1,TMEM79,OCRL,KDELR2,MGAT4B,ACER3,RND3,B4GALNT3,NECAB3…
GO:CC	extracellular region	GO:0005576	0.00388053	8.00953	2.41111	4052	3205	898	18911	CTSV,LAMA5,KRT8,TUFT1,KRT18,BAIAP2L1,EFNA1,HSPA1A,HSPA1B,PPL,DDR1,BAIAP2,ADGRG1,MAL2,TOM1L1,PIP4K2C,BCAM,PDGFB,PRXL2A,SPR,MYO5B,EPCAM,SDC4,F11R,WFDC2,PTPRF,PATJ,WNT7B,KRT15,TSKU,AIF1L,MYH14,TSPAN6,ITGB4,SCNN1A,VWA1,PON3,MET,LYPD3,KRT7,AGRN,EFNA5,SFN,CPVL,TMEM132A,TACSTD2,CDH1,LAMB3,DSG2,EPN3,PRSS22,SDC1,C1ORF56,WNT9A,SLPI,ATP1B1,LSR,TMPRSS13,GPRC5C,TSPAN1,TGFA,DSC2,STAU1,CAPN2,PLS1,INHBB,WASL,MUC…
TF	Factor: c-Fos; motif: TGACTCAN	TF:M03815	0.00397181	7.97599	2.40101	2319	1115	205	18911	KIAA1522,KRT8,KRT80,KRT18,MAP3K13,MAL2,FAM83H,PKP3,RAB5IF,SPR,ELF3,EEF1A2,EPCAM,NHLRC1,GRB7,TSKU,MYH14,SLC39A1,FOXA1,ETNK2,MET,C19ORF33,TRIM16L,EFNA5,SFN,PERP,TMEM132A,HES1,TMEM54,LAMB3,S100A2,CLDN9,PRSS22,TACC2,GET4,STYK1,ABCC3,CDC42BPG,MPZL2,CMTM4,STON2,DSC2,MAB21L4,EGLN3,TMEM265,LAMC2,KIFC3,PIR,UPP1,NANOS1,GPR87,SPINT1,TMEM51,GPR39,PROM2,DUSP23,STX1A,PCSK1N,CLDN3,C1ORF115,HID1,SCEL,NECTIN4,OSG…
HP	Abnormality of epidermal morphology	HP:0011124	0.00398214	7.97224	2.39988	67	3655	30	18911	CLDN1,GRHL2,LMNA,DSP,JUP,EGFR,CARD14,SULT2B1,GJB3,IL36RN,CAST,EXPH5,OSMR,KRT13,CYP26C1,PKP1,WNT10A,ZMPSTE24,NIPAL4,ABCC6,ATP2A2,CASP14,AAGAB,IL1RN,ALOXE3,ATP2C1,KRT10,ADAM17,KRT6C,TGM1
HP	Urethral stricture	HP:0012227	0.00400114	7.96537	2.39782	14	327	5	18911	ITGB4,LAMB3,LAMC2,LAMA3,PLEC
HP	Sparse eyelashes	HP:0000653	0.00403296	7.95394	2.39438	62	2087	21	18911	CLDN1,CDH3,LIPH,LMNA,DSP,ITGA3,NECTIN4,CST6,HR,DLX4,SPINK5,SF3B4,DOLK,GJB2,NECTIN1,EDARADD,ZMPSTE24,WDR35,GJB6,KREMEN1,BANF1
HP	Patchy alopecia	HP:0002232	0.00408156	7.93666	2.38917	19	3512	13	18911	ITGB4,LMNA,NECTIN4,KRT86,KRT83,KRT81,HR,COL17A1,ZMPSTE24,PADI3,IKBKG,TP63,PORCN
TF	Factor: CPBP; motif: NGGGCGG; match class: 1	TF:M05444_1	0.00410181	7.92952	2.38702	3192	4708	945	18911	KIAA1522,LAMA5,EFNA1,RHPN2,HSPA1B,BAIAP2,TLCD1,IGSF3,CCNJL,SPR,CYB561,ANKEF1,MAP7,SOWAHC,ESRP2,KRT7,EFNA5,CEP170B,HES1,RTL8A,PRSS22,WNT9A,ATP1B1,ABCC3,SSH3,LSR,TJP1,CMTM4,RGL3,SLC2A4RG,CAPN2,PLEKHG6,MUC1,CLDN7,MPP3,KLF5,CITED4,SPIRE2,PIR,NSUN7,DSP,KDF1,CACNG4,ABHD11,MISP,TPD52L1,ERBB3,GPR39,KIF21A,TC2N,CLDN3,EGFR,LRP5,IL13RA1,CTSD,SYT17,EPPK1,MRGBP,TSEN34,PARD3,SERTAD4,ALDH3A2,MICALL2,HES4,GALE,G…
TF	Factor: Sp2; motif: WGGGCGG; match class: 1	TF:M05332_1	0.00410181	7.92952	2.38702	3192	4708	945	18911	KIAA1522,LAMA5,EFNA1,RHPN2,HSPA1B,BAIAP2,TLCD1,IGSF3,CCNJL,SPR,CYB561,ANKEF1,MAP7,SOWAHC,ESRP2,KRT7,EFNA5,CEP170B,HES1,RTL8A,PRSS22,WNT9A,ATP1B1,ABCC3,SSH3,LSR,TJP1,CMTM4,RGL3,SLC2A4RG,CAPN2,PLEKHG6,MUC1,CLDN7,MPP3,KLF5,CITED4,SPIRE2,PIR,NSUN7,DSP,KDF1,CACNG4,ABHD11,MISP,TPD52L1,ERBB3,GPR39,KIF21A,TC2N,CLDN3,EGFR,LRP5,IL13RA1,CTSD,SYT17,EPPK1,MRGBP,TSEN34,PARD3,SERTAD4,ALDH3A2,MICALL2,HES4,GALE,G…
TF	Factor: Sp6; motif: WGGGCGG; match class: 1	TF:M05361_1	0.00410181	7.92952	2.38702	3192	4708	945	18911	KIAA1522,LAMA5,EFNA1,RHPN2,HSPA1B,BAIAP2,TLCD1,IGSF3,CCNJL,SPR,CYB561,ANKEF1,MAP7,SOWAHC,ESRP2,KRT7,EFNA5,CEP170B,HES1,RTL8A,PRSS22,WNT9A,ATP1B1,ABCC3,SSH3,LSR,TJP1,CMTM4,RGL3,SLC2A4RG,CAPN2,PLEKHG6,MUC1,CLDN7,MPP3,KLF5,CITED4,SPIRE2,PIR,NSUN7,DSP,KDF1,CACNG4,ABHD11,MISP,TPD52L1,ERBB3,GPR39,KIF21A,TC2N,CLDN3,EGFR,LRP5,IL13RA1,CTSD,SYT17,EPPK1,MRGBP,TSEN34,PARD3,SERTAD4,ALDH3A2,MICALL2,HES4,GALE,G…
GO:BP	plasma membrane bounded cell projection assembly	GO:0120031	0.00414804	7.91336	2.38216	586	4405	188	18911	LAMA5,SHTN1,AIF1L,AGRN,TACSTD2,CTTN,FNBP1L,RAP1GAP,WASL,KLF5,NCKAP1,PLEK2,OCLN,EPS8L1,COBL,EPHA2,FHDC1,F2RL1,EMP2,CDC42EP4,RHOD,RAC1,ESPN,CARMIL1,TMEM17,KIF3B,GAS8,ANLN,EPS8L2,CETN2,OPHN1,RDX,WWTR1,TBC1D30,SPAG1,AJUBA,PFN2,MAPK15,DNAH5,CCNO,CELSR2,OCRL,TTC30B,RAB17,MYO10,FGD6,DMTN,PPP1R9A,SPAG16,YAP1,TTC12,PLD1,EPS8,SLC9A3R1,CDC14B,GALNT11,ARHGEF26,DYNLRB1,CFAP206,B9D1,FAM187A,MCIDAS,CEP70,TOGARA…
KEGG	Bacterial invasion of epithelial cells	KEGG:05100	0.00416717	7.90672	2.38016	77	839	13	18911	MET,CDH1,CTTN,WASL,BCAR1,PXN,ARPC1A,RAC1,CTNNA1,CAV2,ELMO3,PTK2,PIK3CB
GO:BP	positive regulation of cytoskeleton organization	GO:0051495	0.00426649	7.87273	2.36993	226	471	20	18911	BAIAP2L1,HSPA1A,HSPA1B,BAIAP2,SDC4,MET,CTTN,WASL,SPIRE2,ID1,NCKAP1,OCLN,LIMCH1,PXN,ARPC1A,ARHGEF5,F2RL1,CDC42EP4,RAC1,CARMIL1
HP	Alopecia	HP:0001596	0.00428313	7.86712	2.36824	188	346	15	18911	RIPK4,ITGB4,ITGB6,PERP,LAMB3,CLDN1,LAMC2,LIPH,LMNA,DSP,JUP,LAMA3,NECTIN4,PLEC,NSDHL
HP	Malnutrition	HP:0004395	0.00428457	7.86663	2.36809	30	382	7	18911	MYO5B,CDH1,LAMB3,LAMC2,IRF6,LAMA3,ARHGAP29
CORUM	ITGA6-ITGB4-Laminin10/12 complex	CORUM:2319	0.00430021	7.86138	2.36651	5	2566	5	18911	LAMA5,ITGB4,LAMB2,ITGA6,LAMC1
CORUM	ITGA6-ITGB4-Laminin10/12 complex	CORUM:2318	0.00430021	7.86138	2.36651	5	2566	5	18911	LAMA5,ITGB4,LAMB1,ITGA6,LAMC1
CORUM	ITGA6-ITGB4-LAMA5 complex	CORUM:2322	0.00435644	7.84263	2.36087	3	75	2	18911	LAMA5,ITGB4
GO:BP	entry of bacterium into host cell	GO:0035635	0.00454837	7.78043	2.34214	15	1807	9	18911	MET,CDH1,CTNND1,KRT6A,FUCA2,SRC,CXCL8,ITGAV,CAV1
REAC	RUNX3 regulates YAP1-mediated transcription	REAC:R-HSA-8951671	0.00457954	7.77058	2.33918	7	1598	6	18911	TEAD3,TEAD4,WWTR1,TEAD1,YAP1,TEAD2
GO:BP	branching morphogenesis of an epithelial tube	GO:0048754	0.00458354	7.76932	2.3388	153	3694	56	18911	LAMA5,CELSR1,DDR1,FOXA1,MET,ESRP2,TACSTD2,SIX4,DLG5,LRP5,SEMA3E,EPHA2,PBX1,DAG1,LHX1,MDK,AREG,FGFR2,WNT4,LGR4,GREB1L,YAP1,SIX1,SRC,CTSH,EDN1,NPNT,HOXB7,ADAMTS16,SOX9,BMP7,SIX2,HOXD11,CTNNBIP1,NRP1,VANGL2,WNT6,EGF,NRARP,VDR,EXT1,KDM5B,DLG1,MSX2,PPP1CA,ACVR1,GBX2,FKBPL,LRP6,SPRY1,TNC,CTSZ,SHH,BMP2,PGR,EYA1
TF	Factor: CSX; motif: NKRAGWGS; match class: 1	TF:M10008_1	0.00469453	7.7348	2.32841	3812	1587	416	18911	LAMA5,TUFT1,TMEM184A,BAIAP2L1,MAP3K13,BAIAP2,PLPP2,P2RY2,BCAM,PKP3,MYO5B,GRB7,WFDC2,PTPRF,TNFRSF21,KRT15,AIF1L,FOXA1,SCNN1A,VWA1,TSPAN13,MET,PMEPA1,ESRP1,EFNA5,SFN,TMEM30B,BCAP31,SDC1,C6ORF141,OVOL2,STYK1,ABCC3,CLMN,SSH3,LSR,GPRC5C,CMTM4,GRAMD2A,DSC2,SIX4,PLS1,MUC1,PKP2,VMP1,TBC1D8,B3GNT3,SPIRE2,UPP1,DSP,CUEDC1,SEMA4B,PARD6B,CACNG4,PANX2,ABHD11,RASSF10,GIPC1,TMEM51,TMEM40,ERBB3,LAMA3,GPR39,PLEKHA…
GO:BP	sensory organ development	GO:0007423	0.00484589	7.68902	2.31463	594	3195	145	18911	CELSR1,DDR1,SDC4,WNT7B,TSKU,ESRP1,THRB,HES1,WNT9A,JAG2,SIX4,PLS1,TFAP2A,GRHL2,BFSP1,MCOLN3,EGFR,LRP5,EPHA2,OBSL1,GNGT1,ALDH1A3,MYO6,ADGRV1,PBX1,CYP1A1,SCRIB,CLCN2,HOXC13,PPP1R13L,LRIG3,NTF4,ATP6V1B1,GPD2,LHX1,SKIL,FGFR2,FOXC1,SOX2,TGFB2,KLF4,FJX1,FZD6,CYP26B1,RXRA,SIX1,RDH13,EPHB2,CRYBB3,BCAR3,SLC9A3R1,ACHE,PRKCI,TSPAN12,EDN1,CST3,ACTL6A,B9D1,FREM2,GRHL3,JUN,ZIC1,CYP1B1,JAG1,NTN1,PPP2R3A,GJB2,MYO…
GO:BP	regulation of actin filament bundle assembly	GO:0032231	0.00488634	7.67703	2.31102	103	1146	21	18911	SDC4,F11R,MET,TACSTD2,TJP1,ID1,PPFIA1,LIMCH1,PXN,ARHGEF5,RAC1,CARMIL1,PHLDB2,S100A10,RDX,PFN2,WNT4,EPHA1,PPP1R9A,CX3CL1,ARHGEF10L
REAC	Post-translational protein phosphorylation	REAC:R-HSA-8957275	0.00497582	7.65085	2.30314	107	4955	49	18911	VWA1,TMEM132A,GOLM1,LAMB1,APP,SERPINA1,PROC,FUCA2,C3,APLP2,PRSS23,MSLN,CST3,WFS1,LAMB2,KTN1,CP,CYR61,APOE,MATN3,LAMC1,CHGB,IGFBP3,MGAT4A,IGFBP1,SERPIND1,MEPE,RCN1,TNC,MELTF,SERPINA10,P4HB,F5,GPC3,FAM20C,IGFBP4,HSP90B1,BPIFB2,VGF,TF,AMTN,SPARCL1,FGG,EVA1A,SPP1,PCSK9,BMP4,CKAP4,ITIH2
TF	Factor: E2F-4; motif: GCGGGAAANA; match class: 1	TF:M02090_1	0.00499971	7.64394	2.30106	6145	3807	1421	18911	TSPAN15,KIAA1522,CTSV,LAMA5,CELSR1,SHTN1,BAIAP2L1,EFNA1,RHPN2,HSPA1A,MLF1,DDX27,DDR1,BAIAP2,MAL2,TLCD1,PLPP2,PIP4K2C,P2RY2,BCAM,ELF3,MYO5B,EEF1A2,SDC4,ARHGEF16,GRB7,WFDC2,PTPRF,TNFRSF21,WNT7B,AIF1L,TSPAN6,PIGT,TFAP2C,CDS1,LLGL2,B3GNT5,MAP7,PON3,TSPAN13,MET,SOWAHC,PCDH1,C19ORF33,CGN,ESRP2,ACOT4,AGRN,EFNA5,KIAA0895,ST6GALNAC2,TMEM132A,TMEM30B,DSG2,TRIM47,BCAP31,PRSS22,RCE1,SDC1,CARD10,C6ORF141,JAG2…
HP	Female infertility	HP:0008222	0.00500496	7.64243	2.3006	59	3884	28	18911	C11ORF80,GAS8,SPAG1,DNAH5,CCNO,TRIP13,TTC12,MCIDAS,CCDC40,CCDC103,DNAAF5,FOXJ1,FOXL2,CFAP300,HYDIN,CCDC151,DNAL1,DNAAF3,RSPH1,CFAP221,DNAI1,RSPH3,TUBB8,PGR,DNAAF4,DNAJB13,SPEF2,DRC1
GO:BP	regulation of biological quality	GO:0065008	0.00501035	7.64087	2.30013	4072	4442	1098	18911	SHTN1,BAIAP2L1,EFNA1,HSPA1A,HSPA1B,MAP3K13,DDR1,CLDN4,BAIAP2,ADGRG1,TLCD1,P2RY2,PDGFB,MYO5B,F11R,WNT7B,MYH14,LAPTM4B,CDS1,FOXA1,SCNN1A,VAPB,MET,ITGB6,THRB,AGRN,EFNA5,SFN,TMEM30B,DSG2,CLDN1,CTTN,BCAP31,SYT12,GET4,ATP1B1,PTPN3,SSH3,LSR,TSPAN1,TJP1,ZNF205,DSC2,SIX4,STAU1,GRHL1,PLS1,INHBB,WASL,PKP2,G6PD,MB,CTNND1,AURKA,CDH3,SPIRE2,SLC22A5,ID1,YTHDF1,DLG5,NANOS1,LMNA,DSP,PLK2,GCNT2,NCKAP1,SYT7,SEMA4B,…
GO:MF	transmembrane receptor protein kinase activity	GO:0019199	0.00506741	7.62453	2.29521	81	3311	31	18911	DDR1,MET,ERBB3,EGFR,EPHA2,ERBB2,MST1R,FGFR2,EPHA1,EPHB4,EPHB2,FGFR3,FGFR4,TYRO3,IGF1R,ACVR2A,EPHB3,BMPR1B,EPHA4,EFEMP1,MERTK,NRP1,EPHA10,ACVR1B,ACVR1,PDGFRL,EFNB3,EPHA6,EFNA4,NRP2,CRIM1
GO:BP	positive regulation of signaling	GO:0023056	0.00507742	7.62169	2.29436	1749	2023	254	18911	EFNA1,HSPA1A,HSPA1B,WWC1,MAP3K13,BAIAP2,ADGRG1,PDGFB,ELF3,F11R,WNT7B,TSPAN6,FOXA1,MET,MAP3K9,STARD10,HES1,BCAP31,SYT12,WNT9A,JAG2,TGFA,STAU1,INHBB,CDH3,YTHDF1,DLG5,PLK2,GCNT2,JUP,CACNG4,GIPC1,TRIM16,TPD52L1,ERBB3,STX1A,POR,EGFR,RYK,SCEL,PFKFB2,PTK6,LTBR,ARHGAP8,INHA,PSMA7,STX3,INAVA,MAP3K21,ARHGEF5,F2RL1,LFNG,EMP2,AGR2,ADGRV1,RAC1,BTC,CTNNA1,CD24,KLK6,FAM110C,SCRIB,MID2,NECTIN2,PRKCZ,APP,GAS8,S10…
WP	Focal Adhesion-PI3K-Akt-mTOR-signaling pathway	WP:WP3932	0.00509548	7.61657	2.29282	301	510	22	18911	LAMA5,EFNA1,PDGFB,ITGB4,FOXA1,MET,ITGB6,EFNA5,LAMB3,LAMC2,ITGA3,LAMA3,EGFR,PFKFB2,FGF12,EPHA2,GNG4,GNGT1,LAMB1,SLC2A1,ITGB5,PRKAA2
HP	Wheezing	HP:0030828	0.00510355	7.61428	2.29213	54	3884	27	18911	SCNN1A,GAS8,SPAG1,DNAH5,SERPINA1,CCNO,TTC12,MCIDAS,CCDC40,CCDC103,DNAAF5,FOXJ1,CFAP300,HYDIN,SCNN1B,CCDC151,DNAL1,DNAAF3,RSPH1,CFAP221,DNAI1,RSPH3,SCNN1G,DNAAF4,DNAJB13,SPEF2,DRC1
GO:MF	protein domain specific binding	GO:0019904	0.00513434	7.60561	2.28952	717	2977	156	18911	HSPA1A,MLF1,HSPA1B,BAIAP2,TOM1L1,ARHGEF16,F11R,LLGL2,FOXA1,SCNN1A,VAPB,PMEPA1,HES1,EPN3,CARD10,TJP1,MPP3,SLC22A5,ITGA3,GIPC1,TRIM16,ERRFI1,STX1A,OCLN,BCAR1,CARD14,TNKS1BP1,L1CAM,ARHGAP29,CXADR,ADAM15,ESPN,ACSL3,APP,SRCIN1,CRB3,SQSTM1,AFAP1L2,PLSCR1,SHANK2,DAG1,CABYR,PTPN12,RDX,NOL3,ELMO3,HSPA2,SKIL,CBLC,PTK2,PLEKHA1,MAPK15,WIPF3,CCT6A,PPARG,FADD,PPP1R9A,RXRA,RAB27B,BCL2L1,SLC9A3R1,SRC,DTNA,GNG12,…
GO:BP	regulation of cell junction assembly	GO:1901888	0.00515062	7.60104	2.28814	203	535	20	18911	SDC4,F11R,AGRN,EFNA5,CLDN1,TJP1,SIX4,DLG5,CLDN3,OCLN,LIMCH1,EPHA2,DUSP3,RHOD,RAC1,CAMSAP3,PHLDB2,APP,CRB3,S100A10
GO:BP	regulation of actomyosin structure organization	GO:0110020	0.00515713	7.59922	2.28759	100	535	14	18911	SDC4,F11R,MET,TACSTD2,TJP1,PPFIA1,LIMCH1,PXN,ARHGEF5,RAC1,CARMIL1,PHLDB2,ECT2,S100A10
MIRNA	hsa-miR-1-3p	MIRNA:hsa-miR-1-3p	0.00522623	7.58001	2.28181	898	3634	229	18911	KIAA1522,SHTN1,PLPP2,SDC4,F11R,PTPRF,PIGT,ITGB4,MET,AGRN,SFN,DSG2,CTTN,C1ORF56,ZNF185,TSPAN1,PLS1,VMP1,G6PD,PIR,PLK2,JUP,PARD6B,ITGA3,ABHD11,RBM47,EGFR,TNKS1BP1,HOOK1,BLCAP,FHDC1,PSMA7,L1CAM,PACSIN3,ARHGAP29,PPP1R16A,F2RL1,ASPH,CDC42BPB,BTC,CNIH4,SRXN1,DPY30,PHLDB2,CDCP1,FOLR1,TPD52L2,GJB3,TM4SF1,PLS3,MARCKS,CLDN12,S100A16,MTHFS,GPD2,EPB41L4B,PLCXD2,HACD2,RBM42,SERPINB5,CRIP2,FGFR2,ALG3,ORMDL2,S1…
KEGG	Fluid shear stress and atherosclerosis	KEGG:05418	0.00532314	7.55351	2.27383	136	2221	33	18911	PDGFB,SDC4,SDC1,RAC1,NQO1,PRKCZ,PRKAA2,SQSTM1,CAV2,PTK2,PIK3CB,MGST1,CTSL,SRC,GSTM3,EDN1,JUN,GSTO2,ITGAV,RAC3,PDGFA,GPC1,THBD,MMP9,CDH5,CAV1,ACVR2A,MAPK13,CALML5,ASS1,BMPR1B,MGST3,FOS
TF	Factor: SNA; motif: NRCAGGTGCR	TF:M12257	0.00535999	7.54355	2.27084	2134	341	75	18911	TSPAN15,KIAA1522,TUFT1,TMEM184A,BAIAP2L1,RHPN2,PPL,FAM241B,MAL2,TOM1L1,FAM83H,P2RY2,MYO5B,EPCAM,EPB41L1,F11R,CYB561,PIGT,FOXA1,SCNN1A,MAP7,IQANK1,TSPAN13,YIPF6,PERP,CEP170B,CDH1,AP1M2,CLDN1,SYT12,WNT9A,JAG2,ATP1B1,ABCC3,SSH3,LSR,CDC42BPG,TJP1,ZNF205,HM13,GRHL1,TFAP2A,TMEM265,CLDN7,PKP2,MARVELD2,CITED4,G6PD,ADRM1,C11ORF52,KRT19,LIPH,LMNA,PARD6B,ABHD11,WFDC3,RASSF10,SPTBN2,ERBB3,NUDT14,PLEKHA7,EVPL…
TF	Factor: slug; motif: NRCAGGTGCR	TF:M12261	0.00535999	7.54355	2.27084	2134	341	75	18911	TSPAN15,KIAA1522,TUFT1,TMEM184A,BAIAP2L1,RHPN2,PPL,FAM241B,MAL2,TOM1L1,FAM83H,P2RY2,MYO5B,EPCAM,EPB41L1,F11R,CYB561,PIGT,FOXA1,SCNN1A,MAP7,IQANK1,TSPAN13,YIPF6,PERP,CEP170B,CDH1,AP1M2,CLDN1,SYT12,WNT9A,JAG2,ATP1B1,ABCC3,SSH3,LSR,CDC42BPG,TJP1,ZNF205,HM13,GRHL1,TFAP2A,TMEM265,CLDN7,PKP2,MARVELD2,CITED4,G6PD,ADRM1,C11ORF52,KRT19,LIPH,LMNA,PARD6B,ABHD11,WFDC3,RASSF10,SPTBN2,ERBB3,NUDT14,PLEKHA7,EVPL…
HP	Sparse and thin eyebrow	HP:0000535	0.00540094	7.53257	2.26753	59	1653	18	18911	CLDN1,CDH3,LIPH,DSP,JUP,ITGA3,NECTIN4,ST14,KRT17,RIN2,HR,SPINK5,CRIPT,DOLK,GJB2,NECTIN1,EDARADD,WNT10A
HP	Chronic active hepatitis	HP:0200120	0.00558682	7.48376	2.25284	5	12	2	18911	KRT8,KRT18
GO:BP	branching involved in salivary gland morphogenesis	GO:0060445	0.00563647	7.47099	2.24899	23	2202	12	18911	LAMA5,ESRP2,DAG1,FGFR2,PLXNA1,NTN4,TGM2,SEMA3A,PDGFA,SEMA3C,BMP7,NRP1
GO:BP	tube development	GO:0035295	0.00569598	7.45584	2.24443	1050	1429	132	18911	LAMA5,CELSR1,EFNA1,DDR1,ADGRG1,EPCAM,SDC4,PAK4,WNT7B,FOXA1,MET,ITGB6,ESRP2,THRB,YIPF6,HES1,TACSTD2,SDC1,CARD10,OVOL2,TGFA,TJP1,SHB,SIX4,KLF5,GRHL2,ID1,DLG5,PLK2,SPINT1,JUP,ITGA3,ERRFI1,EGFR,LRP5,COBL,SEMA3E,LTBP3,PTK6,EPHA2,NAXE,SPINT2,ANXA3,EMP2,ADAM15,AGR2,HTATIP2,TNS3,CD24,PBX1,POFUT1,CYP1A1,SCRIB,FOLR1,PDCD6,SPATA2,TNFRSF12A,DAG1,IL18,AMOTL2,ERBB2,TNFAIP2,WWTR1,DHCR7,ST14,LHX1,MDK,RIN2,AREG,P…
GO:BP	hippo signaling	GO:0035329	0.00574676	7.44304	2.24058	45	995	12	18911	WWC1,TJP1,DLG5,TEAD3,SHANK2,TEAD4,AMOTL2,WWTR1,TEAD1,AJUBA,STK3,YAP1
TF	Factor: LBP9; motif: ACYRGTNNNNACYRGT	TF:M11492	0.00578052	7.43459	2.23803	7177	330	179	18911	TSPAN15,KIAA1522,CTSV,LAMA5,CELSR1,TUFT1,SHTN1,RIPK4,TMEM184A,KRT80,BAIAP2L1,RHPN2,HSPA1A,HSPA1B,WWC1,PPL,FAM241B,ADGRG1,TOM1L1,TLCD1,PIP4K2C,P2RY2,BCAM,PKP3,CHMP4C,RASEF,CCNJL,SPR,MYO5B,EEF1A2,EPB41L1,WFDC2,TNFRSF21,WNT7B,AIF1L,ARHGAP39,CYB561,TSPAN6,LAPTM4B,TFAP2C,SLC39A1,CDS1,FOXA1,SCNN1A,MAP7,PON3,ETNK2,KLC3,TSPAN13,MET,SOWAHC,PCDH1,CGN,PMEPA1,ESRP1,ACOT4,KRT7,AGRN,SFN,KIAA0895,PERP,CEP170B,H…
GO:BP	cellular hormone metabolic process	GO:0034754	0.00582241	7.42417	2.2349	132	4829	60	18911	ALDH1A3,CYP1A1,CLCN2,CRABP2,SDR16C5,PLEKHA1,DHRS3,RBP1,WNT4,SRD5A1,CYP26B1,AKR1B10,RDH13,CYP2S1,AKR1B15,AKR1C3,CYP1B1,AKR1C2,ECE1,CYP26C1,LRAT,DGAT2,SGPL1,AKR1C1,PPARGC1A,TIPARP,DHRS11,ADH7,PNPLA4,CYP27C1,DHRS9,HSD17B3,CYP26A1,BCO1,ADM,CACNA1H,STARD3,RDH12,SULT1E1,CYP2C8,CRABP1,SHH,BMP2,AKR1C4,DHRS2,ALDH1A2,RDH11,CYP1A2,ESR1,BCO2,RBP4,BMP5,STARD3NL,HSD17B8,CYP3A5,PLB1,SPP1,LHB,RDH16,AKR1D1
GO:CC	costamere	GO:0043034	0.00584316	7.41904	2.23335	19	1298	10	18911	KRT8,SDC4,KRT19,PLEC,SVIL,DAG1,SYNM,ANK3,AHNAK2,AHNAK
HP	Abnormality of odontoid tissue	HP:3000050	0.00585663	7.41571	2.23235	176	840	23	18911	FAM83H,ITGB4,ITGB6,LAMB3,CLDN1,LAMC2,GRHL2,LAMA3,NECTIN4,LTBP3,PLEC,ALDH3A2,OBSL1,GALNT3,ADGRV1,ESPN,DHCR7,GTF2IRD1,CNNM4,FGFR2,WDR72,IL17RC,OCRL
TF	Factor: CP2; motif: NNNNCCAGNCNN	TF:M07602	0.00602517	7.37478	2.22003	10541	262	194	18911	TSPAN15,KIAA1522,CTSV,LAMA5,KRT8,CELSR1,TUFT1,TMEM184A,KRT80,KRT18,BAIAP2L1,RHPN2,MLF1,HSPA1B,DDX27,WWC1,PPL,MAP3K13,DDR1,CLDN4,FAM241B,BAIAP2,ADGRG1,MAL2,TLCD1,PLPP2,PIP4K2C,FAM83H,IGSF3,PKP3,CHMP4C,RAB5IF,RASEF,PRXL2A,SPR,ELF3,MYO5B,EPCAM,PAK4,F11R,WFDC2,PTPRF,WNT7B,TSKU,AIF1L,MYH14,ARHGAP39,CYB561,TSPAN6,PIGT,ANKEF1,SLC39A1,ITGB4,CDS1,LLGL2,KIAA1671,SCNN1A,MAP7,VWA1,PON3,ETNK2,IQANK1,KLC3,VAPB…
HP	Abnormal pulmonary vein morphology	HP:0030968	0.00605816	7.3669	2.21766	72	3884	32	18911	LFNG,GAS8,DHCR24,SPAG1,DNAH5,CCNO,NR2F2,TTC12,MCIDAS,CCDC40,CCDC103,MESP2,DNAAF5,FOXJ1,CFAP300,GATA4,HYDIN,MYRF,CCDC151,DNAL1,DNAAF3,RSPH1,CFAP221,RIPPLY2,DLL3,DNAI1,RSPH3,GATA6,DNAAF4,DNAJB13,SPEF2,DRC1
HP	Abnormality of the pulmonary veins	HP:0011718	0.00605816	7.3669	2.21766	72	3884	32	18911	LFNG,GAS8,DHCR24,SPAG1,DNAH5,CCNO,NR2F2,TTC12,MCIDAS,CCDC40,CCDC103,MESP2,DNAAF5,FOXJ1,CFAP300,GATA4,HYDIN,MYRF,CCDC151,DNAL1,DNAAF3,RSPH1,CFAP221,RIPPLY2,DLL3,DNAI1,RSPH3,GATA6,DNAAF4,DNAJB13,SPEF2,DRC1
TF	Factor: E2A; motif: CAGNTGNN	TF:M07353	0.00613668	7.34833	2.21207	2515	132	42	18911	TSPAN15,KIAA1522,LAMA5,CELSR1,TUFT1,TMEM184A,RHPN2,HSPA1A,HSPA1B,WWC1,BAIAP2,IGSF3,CHMP4C,RASEF,CCNJL,ELF3,MYO5B,EEF1A2,ARHGEF16,EPB41L1,GRB7,KRT15,AIF1L,ARHGAP39,TSPAN6,ANKEF1,SLC39A1,LLGL2,VWA1,ETNK2,KLC3,MET,CGN,SFN,ST6GALNAC2,CPVL,TMEM132A,TMEM54,DSG2,CLDN9,BCAP31,PRSS22
TF	Factor: E2A; motif: CACCTGNY; match class: 1	TF:M00973_1	0.00624014	7.32421	2.20481	986	93	20	18911	KIAA1522,RIPK4,TMEM184A,WWC1,PPL,FAM241B,ADGRG1,FAM83H,CHMP4C,SPR,ELF3,EEF1A2,ARHGEF16,GRB7,CYB561,SCNN1A,MAP7,IQANK1,PCDH1,C19ORF33
CORUM	S1PR1-c-Met-ITGB4 complex, HGF- or S1P-induced	CORUM:6798	0.00628407	7.31409	2.20176	3	90	2	18911	ITGB4,MET
CORUM	PXN-ITGB5-PTK2 complex	CORUM:2726	0.00628422	7.31405	2.20175	3	769	3	18911	PXN,ITGB5,PTK2
GO:BP	tube morphogenesis	GO:0035239	0.00663173	7.2364	2.17837	852	1429	113	18911	LAMA5,CELSR1,EFNA1,DDR1,ADGRG1,SDC4,PAK4,WNT7B,FOXA1,MET,ESRP2,HES1,TACSTD2,CARD10,OVOL2,TGFA,TJP1,SHB,SIX4,KLF5,GRHL2,ID1,DLG5,PLK2,SPINT1,JUP,EGFR,LRP5,COBL,SEMA3E,EPHA2,NAXE,SPINT2,ANXA3,EMP2,ADAM15,AGR2,HTATIP2,PBX1,POFUT1,SCRIB,FOLR1,PDCD6,TNFRSF12A,DAG1,IL18,AMOTL2,ERBB2,TNFAIP2,ST14,LHX1,MDK,RIN2,AREG,PTK2,ITGB8,FGFR2,PLCD3,PIK3CB,FOXC1,WNT4,ANXA2,NRCAM,EPHA1,NR2F2,PPARG,TGFB2,STK3,KLF4,FZ…
HP	Alopecia of scalp	HP:0002293	0.00665135	7.23214	2.17709	25	327	6	18911	ITGB4,LAMB3,CLDN1,LAMC2,LAMA3,PLEC
TF	Factor: CTCF; motif: NNNGCCASCAGRKGGCRSNN	TF:M01200	0.00670878	7.21973	2.17336	3782	4900	1153	18911	KIAA1522,LAMA5,KRT8,CELSR1,SHTN1,TMEM184A,KRT18,BAIAP2L1,RHPN2,WWC1,FAM241B,IGSF3,PLEKHG3,RAB5IF,PDGFB,SPR,ELF3,MYO5B,ARHGEF16,GRB7,F11R,ITGB4,LLGL2,KIAA1671,SCNN1A,MAP7,MET,SOWAHC,PCDH1,CGN,ESRP2,ESRP1,STARD10,AGRN,EFNA5,ST6GALNAC2,TMEM132A,HES1,CDH1,TMEM54,CLDN9,CLDN1,PRSS22,SYT12,STYK1,ATP1B1,ABCC3,SSH3,GPRC5C,PRPF6,TJP1,MPZL2,CMTM4,SHB,DSC2,HM13,SLC2A4RG,PPP1R26,EPHX1,WASL,MUC1,KIFC3,MARVELD2…
TF	Factor: E2F-1; motif: NNNSSCGCSAANN	TF:M07250	0.00677553	7.20545	2.16906	10257	2964	1805	18911	LAMA5,CELSR1,TUFT1,SHTN1,RHPN2,PPL,FAM241B,MAL2,TLCD1,PIP4K2C,FAM83H,IGSF3,CHMP4C,PLEKHG3,RAB5IF,PDGFB,RASEF,CCNJL,MYO5B,EEF1A2,EPCAM,SDC4,NHLRC1,EPB41L1,PAK4,PTPRF,PATJ,TNFRSF21,WNT7B,AIF1L,MYH14,CYB561,PIGT,LAPTM4B,ANKEF1,TFAP2C,SLC39A1,CDS1,FOXA1,B3GNT5,SCNN1A,MAP7,VWA1,PON3,ETNK2,IQANK1,VAPB,TSPAN13,MET,SOWAHC,PCDH1,C19ORF33,LYPD3,CGN,MAP3K9,ESRP2,ESRP1,STARD10,ACOT4,KRT7,AGRN,TRIM16L,EFNA5,K…
MIRNA	hsa-miR-124-3p	MIRNA:hsa-miR-124-3p	0.00677975	7.20455	2.16879	1423	477	64	18911	RIPK4,EFNA1,TOM1L1,FAM83H,ELF3,SDC4,F11R,TNFRSF21,TSKU,AIF1L,TSPAN6,TMEM54,AP1M2,LAMB3,S100A2,DSG2,JAG2,ABCC3,CMTM4,SIX4,SLC2A4RG,MUC1,CTNND1,AURKA,SLC22A5,ID1,LMNA,NSUN7,JUP,ACP6,ITGA3,MANBAL,MISP,RBM47,PLEKHA7,RYK,KIAA1217,FAM83D,HMGB3,PLEC,SERTAD4,LIMCH1,CARD14,LRRC1,PXN,EPHA2,IQCE,FHDC1,L1CAM,PACSIN3,ARHGAP29,MAP3K21,PTGES,TRIM29,ADAM15,ANXA8,RHOV,GALNT3,RAC1,HTATIP2,BTC,SPIN3,PBX1,POFUT1
REAC	ERBB2 Activates PTK6 Signaling	REAC:R-HSA-8847993	0.00684647	7.19042	2.16453	11	3623	9	18911	EGFR,PTK6,BTC,ERBB2,NRG4,EGF,NRG1,HBEGF,EREG
HP	Follicular hyperkeratosis	HP:0007502	0.00685894	7.1878	2.16374	19	1009	8	18911	POFUT1,KRT86,KRT17,KRT6A,PSENEN,KRT83,KRT81,KRT16
GO:BP	positive regulation of cell communication	GO:0010647	0.00686824	7.18584	2.16315	1744	2083	259	18911	EFNA1,HSPA1A,HSPA1B,WWC1,MAP3K13,BAIAP2,ADGRG1,PDGFB,ELF3,F11R,WNT7B,TSPAN6,FOXA1,MET,MAP3K9,STARD10,HES1,BCAP31,SYT12,WNT9A,JAG2,TGFA,STAU1,INHBB,CDH3,YTHDF1,DLG5,PLK2,GCNT2,JUP,CACNG4,GIPC1,TRIM16,TPD52L1,ERBB3,STX1A,POR,EGFR,RYK,SCEL,PFKFB2,PTK6,LTBR,ARHGAP8,INHA,PSMA7,STX3,INAVA,MAP3K21,ARHGEF5,F2RL1,LFNG,EMP2,AGR2,ADGRV1,RAC1,BTC,CTNNA1,CD24,KLK6,FAM110C,MID2,NECTIN2,PRKCZ,APP,GAS8,S100A9,EC…
HP	Epidermal acanthosis	HP:0025092	0.00686973	7.18553	2.16306	38	3655	20	18911	CLDN1,GRHL2,DSP,JUP,EGFR,CARD14,GJB3,IL36RN,CAST,EXPH5,KRT13,WNT10A,NIPAL4,ATP2A2,AAGAB,IL1RN,ALOXE3,KRT10,KRT6C,TGM1
GO:BP	negative regulation of ERBB signaling pathway	GO:1901185	0.00702914	7.15244	2.1531	52	830	12	18911	PTPN3,TGFA,GPRC5A,ERRFI1,EGFR,DUSP3,BTC,PTPN12,ERBB2,AREG,CBLC,ZGPAT
TF	Factor: E2F-2; motif: NWTTTGGCGCCAWWNN	TF:M11530	0.00703043	7.15217	2.15302	13921	3413	2747	18911	TSPAN15,KIAA1522,CTSV,LAMA5,KRT8,CELSR1,TUFT1,SHTN1,RIPK4,TMEM184A,KRT18,BAIAP2L1,EFNA1,RHPN2,HSPA1A,MLF1,HSPA1B,DDX27,WWC1,PPL,MAP3K13,CLDN4,FAM241B,BAIAP2,MAL2,TOM1L1,TLCD1,PLPP2,PIP4K2C,FAM83H,IGSF3,P2RY2,PKP3,CHMP4C,PLEKHG3,RAB5IF,PDGFB,RASEF,CCNJL,SPR,MYO5B,EEF1A2,EPCAM,SDC4,ARHGEF16,NHLRC1,EPB41L1,PAK4,F11R,WFDC2,PTPRF,PATJ,TNFRSF21,WNT7B,AIF1L,MYH14,ARHGAP39,CYB561,TSPAN6,PIGT,LAPTM4B,ANKE…
REAC	EGFR interacts with phospholipase C-gamma	REAC:R-HSA-212718	0.00709067	7.13986	2.14931	9	3623	8	18911	TGFA,EGFR,BTC,AREG,EGF,EPGN,HBEGF,EREG
GO:BP	positive regulation of cell-matrix adhesion	GO:0001954	0.0070921	7.13957	2.14923	56	1277	15	18911	SDC4,JUP,EMP2,RAC1,PRKCZ,S100A10,DAG1,RIN2,WNT4,EPHA1,FERMT1,CX3CL1,CEACAM6,EPB41L5,FUT1
GO:MF	C3HC4-type RING finger domain binding	GO:0055131	0.00722778	7.11223	2.141	6	19	2	18911	HSPA1A,HSPA1B
GO:BP	focal adhesion assembly	GO:0048041	0.00727038	7.10375	2.13844	85	924	16	18911	SDC4,EFNA5,CTTN,LIMCH1,PTPRK,DUSP3,RHOD,RAC1,CAMSAP3,PHLDB2,S100A10,ITGA2,AJUBA,PTK2,WNT4,DMTN
TF	Factor: VDR; motif: RRGGTCANNGRGKTCA; match class: 1	TF:M09671_1	0.00749281	7.06028	2.12536	2297	490	103	18911	TMEM184A,BAIAP2L1,WWC1,DDR1,CLDN4,MAL2,TLCD1,IGSF3,P2RY2,BCAM,ELF3,EEF1A2,ARHGEF16,EPB41L1,PATJ,TSPAN6,PIGT,LLGL2,SCNN1A,MAP7,ETNK2,C19ORF33,PMEPA1,SFN,TMEM132A,CEP170B,TACSTD2,CDH1,TMEM54,EPN3,CLDN9,CTTN,RCE1,SYT12,JAG2,ZNF185,TSPAN1,CMTM4,HM13,RAP1GAP,EPHX1,CAPN2,PLEKHG6,MAB21L4,CITED4,ADRM1,ID1,PRRG4,NANOS1,ALG1L,ACP6,PANX2,IRF6,MISP,TRIM16,ERBB3,DUSP23,POR,EPS8L1,FXYD3,EPPK1,MRGBP,LTBP3,SERTA…
REAC	PCP/CE pathway	REAC:R-HSA-4086400	0.00765377	7.02961	2.11612	92	4921	43	18911	RYK,PSMA7,RAC1,SCRIB,PSMC4,PSMD4,WNT4,FZD6,PSMD12,SMURF1,RAC3,PSMA3,PSMD10,FZD5,SEM1,PSMB3,PSMC2,PSMD2,PSMD11,DAAM1,VANGL2,CLTB,PSMA2,PSMB5,PSMC5,UBC,PSMF1,PSMB4,PSMC1,PRKCG,DVL3,PSMD3,PSMB7,PSMC6,AP2M1,WNT11,FZD7,PSMC3,PSME4,PSMB6,PSMA6,CLTC,FZD3
TF	Factor: FPM315; motif: SRGGGAGGAGGN	TF:M01587	0.0076606	7.02833	2.11574	3112	2851	587	18911	LAMA5,BAIAP2L1,EFNA1,MLF1,WWC1,ADGRG1,MAL2,PLPP2,P2RY2,BCAM,RASEF,CCNJL,ELF3,MYO5B,GRB7,TNFRSF21,WNT7B,CDS1,LLGL2,FOXA1,MAP7,VAPB,PCDH1,ESRP1,AGRN,CEP170B,LAMB3,S100A2,DSG2,CTTN,BCAP31,PRSS22,C6ORF141,ZNF185,LSR,SIX4,GRHL1,RAP1GAP,PLEKHG6,MAB21L4,TFAP2A,WASL,MUC1,MPP3,C4ORF19,KLF5,G6PD,CDH3,DLG5,GCNT2,LAD1,SPINT1,BFSP1,CACNG4,SPTSSB,KIF21A,SEZ6L2,ERRFI1,RASAL2,OCLN,EGFR,LRP5,IL13RA1,EPS8L1,FXYD3,…
GO:BP	Wnt signaling pathway, planar cell polarity pathway	GO:0060071	0.00775399	7.01084	2.11047	110	4921	51	18911	CELSR1,RYK,PSMA7,RAC1,PSMC4,PSMD4,CELSR2,FZD6,PSMD12,SMURF1,VANGL1,GRHL3,ARHGEF19,PSMA3,PSMD10,FZD5,SEM1,DKK1,PSMB3,PSMC2,PSMD2,ANKRD6,WNT7A,PSMD11,SPEF1,DAAM1,VANGL2,PSMA2,ZNRF3,PSMB5,PSMC5,PSMF1,PSMB4,PSMC1,GPC3,DVL3,CELSR3,TIAM1,MKS1,PSMD3,PSMB7,PSMC6,AP2M1,WNT11,FZD7,PSMC3,PSME4,PSMB6,PSMA6,CLTC,FZD3
MIRNA	hsa-miR-3150b-3p	MIRNA:hsa-miR-3150b-3p	0.00778714	7.00469	2.10862	228	83	8	18911	TMEM184A,KRT80,FAM83H,ELF3,EPB41L1,WNT7B,TSKU,VWA1
TF	Factor: ZEB1; motif: NCWCACCTG	TF:M07235	0.0078079	7.00085	2.10747	1368	2718	273	18911	TMEM184A,RHPN2,WWC1,DDR1,FAM241B,ADGRG1,FAM83H,BCAM,NHLRC1,PATJ,CDS1,LLGL2,SCNN1A,VWA1,IQANK1,TSPAN13,SFN,TMEM30B,AP1M2,CLDN1,PRSS22,CDC42BPG,MPZL2,RGL3,STAU1,MAB21L4,MUC1,CLDN7,DNAH14,KRT19,DLG5,PLK2,LAD1,SEMA4B,JUP,PANX2,MISP,LAMA3,KIF21A,EVPL,POR,SLC6A11,LRP5,CTSD,PFKFB2,IGSF9,LTBP3,DMKN,CARD14,LRRC1,ZNF488,ROMO1,PVR,INAVA,ARHGEF5,THAP10,ZNF223,TTC39A,SMIM22,TTC22,HTATIP2,ARHGEF35,CTNNA1,TNK1,…
HP	Fragile nails	HP:0001808	0.00788438	6.98679	2.10323	31	269	6	18911	ITGB4,LAMB3,LAMC2,LMNA,DSP,LAMA3
REAC	Metabolism of vitamins and cofactors	REAC:R-HSA-196854	0.00795252	6.97437	2.0995	185	4407	69	18911	SPR,SDC4,AGRN,SDC1,MOCS3,PC,NAXE,SLC2A1,SLC52A3,MTHFS,SLC46A1,SLC52A2,NAMPT,RBP1,RNLS,PDZD11,AKR1B10,SLC19A3,SLC19A2,NUDT12,AKR1C3,TCN1,PDXK,GSTO2,NAPRT,GPC1,GPHN,PRKG2,LRAT,SLC52A1,FLAD1,SHMT1,APOE,LRP2,TCN2,NMNAT2,COASY,MOCOS,AKR1C1,SDC3,CTRB2,BCO1,NMNAT3,FASN,HSPG2,PPCS,CTRB1,IDH1,VNN1,NT5E,PTS,SLC5A8,LDLR,AKR1C4,LPL,COQ6,RDH11,GPC3,MTRR,PTGS2,CYP8B1,MMAB,BCO2,PNPO,PRSS1,RBP4,SLC5A6,HSP90AA1,C…
HPA	pancreas; exocrine glandular cells[‚â•Medium]	HPA:0350472	0.00795315	6.97426	2.09946	4997	706	237	18911	TSPAN15,KIAA1522,KRT8,TUFT1,KRT18,HSPA1A,WWC1,DDR1,CLDN4,PIP4K2C,FAM83H,CHMP4C,PLEKHG3,PDGFB,RASEF,CCNJL,MYO5B,SDC4,ARHGEF16,EPB41L1,F11R,PATJ,MYH14,CYB561,TSPAN6,ANKEF1,KIAA1671,SCNN1A,MAP7,VAPB,CGN,MAP3K9,KRT7,CPVL,CDH1,DSG2,EPN3,CLDN1,CTTN,BCAP31,PRSS22,RCE1,FNBP1L,SLC25A13,CARD10,ATP1B1,ABCC3,CLMN,PTPN3,SSH3,PRPF6,TGFA,TJP1,MPZL2,CMTM4,MIPOL1,STON2,DSC2,HM13,STAU1,RAP1GAP,EPHX1,WASL,MUC1,CLDN…
TF	Factor: ZEB1; motif: NNCAGGTGWG	TF:M10117	0.00798535	6.96843	2.09771	629	2466	132	18911	RIPK4,DDR1,FAM241B,PIP4K2C,FAM83H,CHMP4C,MYO5B,ARHGEF16,GRB7,PATJ,MAP7,IQANK1,ACOT4,CEP170B,CDH1,AP1M2,PTPN3,RGL3,STAU1,CDH3,KRT19,LAD1,KDF1,NUDT14,OCLN,CTSD,LRRC1,GALE,LTBR,OBSL1,ARHGAP8,INHA,THAP10,TRIM29,RHOV,RHOD,PBX1,GGCT,DGCR6,TEAD4,C2ORF15,PEX11A,KLK8,TESMIN,PLA2G10,LPIN3,RHBDL2,TMX2,MAPK15,SH3BP4,WDR93,MYO10,KLF4,CENPBD1,PLOD2,OVOL1,TRIP13,PSENEN,C17ORF113,EFNB2,LYPD1,PCSK6,PPT1,RUSC1,SLC…
MIRNA	hsa-miR-4784	MIRNA:hsa-miR-4784	0.00803806	6.95894	2.09485	229	83	8	18911	TMEM184A,KRT80,FAM83H,ELF3,EPB41L1,WNT7B,TSKU,VWA1
REAC	Signaling by NOTCH	REAC:R-HSA-157118	0.00808166	6.95113	2.0925	179	3184	57	18911	WWC1,ELF3,HES1,JAG2,EGFR,PSMA7,LFNG,PBX1,POFUT1,HIST1H2BD,TLE1,PSMC4,ITCH,PSEN2,MDK,PSMD4,HIST1H2BK,HDAC11,H2AFJ,PSENEN,PSMD12,ST3GAL4,CNTN1,PRKCI,JUN,JAG1,APH1A,PSMA3,PSMD10,SEM1,TLE2,DLL1,CCND1,PSMB3,PSMC2,PSMD2,HIST1H2AC,DTX2,PSMD11,ATP2A2,HEY1,ARRB1,DNER,B4GALT1,EGF,HIST1H2BJ,PSMA2,PSMB5,PSMC5,PSEN1,UBC,PSMF1,NEURL1,SMAD3,YWHAZ,PSMB4,PSMC1
KEGG	Glycosphingolipid biosynthesis - lacto and neolacto series	KEGG:00601	0.00809625	6.94853	2.09172	27	3365	14	18911	B3GNT5,B3GNT3,GCNT2,B3GALNT1,ST3GAL4,FUT1,FUT9,ABO,B3GALT5,FUT3,B4GALT1,A4GALT,B4GALT4,FUT2
CORUM	LSD1 complex	CORUM:626	0.00810551	6.94688	2.09122	14	19	2	18911	HSPA1A,HSPA1B
GO:BP	kidney development	GO:0001822	0.00811377	6.94541	2.09078	302	2348	66	18911	LAMA5,PDGFB,EPCAM,SDC4,WNT7B,HES1,TACSTD2,SDC1,SIX4,TFAP2A,DLG5,ITGA3,CD24,PBX1,WWTR1,LHX1,FGFR2,FOXC1,WNT4,TGFB2,OVOL1,CYP26B1,FADD,LGR4,GREB1L,YAP1,SIX1,EFNB2,CTSH,IRX2,NPNT,FREM2,JAG1,HOXC11,WFS1,APH1A,PDGFA,HOXB7,ADAMTS16,PLCE1,GLIS2,LAMB2,STRA6,SOX9,ZMPSTE24,DLL1,MMP9,FOXJ1,BMP7,TMED10,SIX2,LRP2,ASS1,HOXD11,SGPL1,EPHA4,FRAS1,CTNNBIP1,NRP1,DACT2,FMN1,VANGL2,WNT6,NIPBL,COL4A4,AQP11
GO:BP	regulation of stress fiber assembly	GO:0051492	0.00813864	6.941	2.08945	91	535	13	18911	SDC4,F11R,MET,TACSTD2,TJP1,PPFIA1,LIMCH1,PXN,ARHGEF5,RAC1,CARMIL1,PHLDB2,S100A10
HP	Sparse hair	HP:0008070	0.00815217	6.9386	2.08873	302	319	18	18911	ITGB4,ITGB6,PERP,CDH1,LAMB3,CLDN1,TFAP2A,LAMC2,CDH3,LIPH,LMNA,DSP,JUP,KDF1,ITGA3,LAMA3,NECTIN4,SEMA3E
TF	Factor: RUNX2; motif: NRACCGCAAACCGCAN; match class: 1	TF:M04106_1	0.0081693	6.93557	2.08782	8019	2009	998	18911	KIAA1522,CTSV,LAMA5,KRT8,CELSR1,TUFT1,SHTN1,RIPK4,TMEM184A,KRT80,KRT18,HSPA1A,MLF1,PPL,FAM241B,BAIAP2,TOM1L1,TLCD1,PLPP2,FAM83H,PKP3,PLEKHG3,PDGFB,MYO5B,SDC4,NHLRC1,PAK4,F11R,WFDC2,PTPRF,TNFRSF21,WNT7B,KRT15,AIF1L,CYB561,LAPTM4B,TFAP2C,SLC39A1,CDS1,LLGL2,FOXA1,B3GNT5,MAP7,VWA1,PON3,ETNK2,IQANK1,TSPAN13,MET,SOWAHC,PCDH1,CGN,MAP3K9,ESRP2,ESRP1,ACOT4,AGRN,EFNA5,ST6GALNAC2,CEP170B,TACSTD2,CDH1,TMEM30…
TF	Factor: MAZ; motif: NKGGGAGGGGRGGR; match class: 1	TF:M02023_1	0.00820579	6.92914	2.08588	3001	3696	714	18911	KIAA1522,LAMA5,CELSR1,SHTN1,BAIAP2L1,EFNA1,BAIAP2,PLPP2,P2RY2,BCAM,MYO5B,EEF1A2,ARHGEF16,PAK4,GRB7,PTPRF,PATJ,AIF1L,CDS1,LLGL2,B3GNT5,MAP7,VWA1,PCDH1,MAP3K9,ESRP1,KRT7,AGRN,TMEM132A,TMEM54,BCAP31,CARD10,WNT9A,ZNF185,STYK1,CLMN,GPRC5C,CDC42BPG,PRPF6,TJP1,CMTM4,STAU1,SLC2A4RG,GRHL1,PPP1R26,PLEKHG6,MAB21L4,MUC1,MPP3,KLF5,CTNND1,ADRM1,SPIRE2,DLG5,CACNG4,PANX2,GIPC1,SPTSSB,TMEM40,PLEKHA7,SEZ6L2,ERRFI1…
TF	Factor: CKROX; motif: SCCCTCCCC; match class: 1	TF:M01175_1	0.00824353	6.92252	2.08389	2580	2360	418	18911	KIAA1522,LAMA5,KRT80,BAIAP2L1,BAIAP2,MAL2,TLCD1,PLPP2,IGSF3,PKP3,PDGFB,EEF1A2,ARHGEF16,PTPRF,AIF1L,ITGB4,FOXA1,MAP7,VWA1,IQANK1,PCDH1,CGN,MAP3K9,ESRP2,ESRP1,KRT7,AGRN,TMEM132A,DSG2,PRSS22,FNBP1L,SLC25A13,WNT9A,CLMN,SSH3,GPRC5C,CDC42BPG,TJP1,ZNF205,SLC2A4RG,PPP1R26,TMEM265,MUC1,ADRM1,DLG5,LAD1,SYT7,CUEDC1,KDF1,CACNG4,PANX2,SPTSSB,SEZ6L2,PROM2,TC2N,MTARC1,LRP5,PPFIA1,SYT17,COBL,PLEKHA6,LTBP3,PARD3,…
HPA	salivary gland; glandular cells[‚â•Medium]	HPA:0420052	0.00826175	6.91934	2.08293	4577	695	217	18911	KIAA1522,KRT8,TUFT1,KRT18,BAIAP2L1,HSPA1A,HSPA1B,WWC1,PPL,CLDN4,BAIAP2,TLCD1,PLEKHG3,PDGFB,RASEF,PRXL2A,ELF3,MYO5B,SDC4,ARHGEF16,EPB41L1,F11R,WFDC2,PATJ,CYB561,TSPAN6,KIAA1671,SCNN1A,MAP7,VAPB,SOWAHC,PCDH1,CGN,KRT7,AGRN,EFNA5,TMEM132A,CDH1,DSG2,EPN3,CTTN,RCE1,FNBP1L,CARD10,JAG2,TACC2,ATP1B1,CLMN,PRPF6,TGFA,TJP1,MPZL2,CMTM4,MIPOL1,DSC2,HM13,STAU1,RAP1GAP,WASL,CLDN7,VMP1,KLF5,DPM1,ADRM1,B3GNT3,KRT1…
GO:BP	regulation of hydrolase activity	GO:0051336	0.00827581	6.91688	2.08219	1285	3550	311	18911	EFNA1,HSPA1A,CLDN4,ARHGEF16,F11R,WFDC2,ARHGAP39,LLGL2,MET,AGRN,EFNA5,SFN,PERP,BCAP31,PRSS22,WNT9A,SLPI,ATP1B1,RGL3,PPP1R26,RAP1GAP,PLEKHG6,EGLN3,TBC1D8,ADRM1,SPINT1,WFDC3,ERRFI1,PROM2,RASAL2,POR,PCSK1N,CLDN3,EGFR,CTSD,ANXA8L1,EPHA2,GRTP1,ARHGAP8,SPINT2,ARHGAP29,AGAP1,ARHGEF5,PPP1R16A,F2RL1,ARFGEF3,ANXA8,ASPH,CAMSAP3,SCRIB,PRKCZ,APP,S100A9,DHCR24,ECT2,S100A10,PLSCR1,PDCD6,RTKN,ARHGAP32,ITGA2,PPP1R…
HP	Increased level of L-fucose in urine	HP:0410067	0.00837727	6.8993	2.0769	6	12	2	18911	KRT8,KRT18
TF	Factor: IRX2a; motif: ACRYGNNNNACRYGT; match class: 1	TF:M11022_1	0.00843885	6.88874	2.07372	5961	2389	900	18911	TSPAN15,KIAA1522,KRT8,CELSR1,SHTN1,KRT18,EFNA1,RHPN2,HSPA1A,HSPA1B,BAIAP2,MAL2,TOM1L1,TLCD1,IGSF3,PLEKHG3,RAB5IF,PDGFB,RASEF,CCNJL,SPR,EEF1A2,SDC4,F11R,PTPRF,TNFRSF21,WNT7B,AIF1L,ARHGAP39,CYB561,SLC39A1,FOXA1,SCNN1A,VAPB,TSPAN13,MET,SOWAHC,ESRP2,ESRP1,ACOT4,AGRN,KIAA0895,YIPF6,HES1,TACSTD2,CDH1,TRIM47,CLDN9,CLDN1,CTTN,RTL8A,RCE1,SDC1,SYT12,CARD10,C1ORF56,WNT9A,JAG2,CLMN,PTPN3,SSH3,GPRC5C,PRPF6,TG…
GO:BP	lung morphogenesis	GO:0060425	0.0085454	6.87064	2.06827	53	227	7	18911	CELSR1,WNT7B,FOXA1,ESRP2,GRHL2,ID1,DLG5
TF	Factor: Fra-1; motif: TGACTCAN	TF:M03869	0.00855985	6.8682	2.06753	3323	965	242	18911	TSPAN15,KIAA1522,KRT8,KRT80,KRT18,MAP3K13,DDR1,MAL2,PLPP2,PIP4K2C,FAM83H,PKP3,RAB5IF,SPR,ELF3,EEF1A2,EPCAM,NHLRC1,GRB7,KRT15,TSKU,MYH14,SLC39A1,FOXA1,ETNK2,MET,C19ORF33,AGRN,TRIM16L,EFNA5,SFN,PERP,TMEM132A,HES1,TMEM54,LAMB3,S100A2,CLDN9,CTTN,PRSS22,TACC2,GET4,STYK1,ABCC3,CDC42BPG,MPZL2,CMTM4,STON2,DSC2,PLS1,MAB21L4,EGLN3,TMEM265,LAMC2,KIFC3,CXCL16,PIR,GPAT3,UPP1,NANOS1,GPR87,SPINT1,SEMA4B,TMEM51,…
HP	Abnormality of dental structure	HP:0011061	0.00864625	6.85371	2.06317	273	463	21	18911	FAM83H,ITGB4,ITGB6,PERP,CDH1,LAMB3,CLDN1,LAMC2,CTNND1,CDH3,GRHL2,LMNA,LAMA3,NECTIN4,LTBP3,PLEC,ALDH3A2,OBSL1,GALNT3,ADGRV1,ESPN
GO:BP	cell differentiation involved in embryonic placenta development	GO:0060706	0.0086731	6.84924	2.06183	28	1793	12	18911	KRT8,KRT19,GRHL2,SPINT2,ST14,NR2F2,STK3,SOX15,FZD5,GJB5,MDFI,SENP2
GO:BP	regulation of ERBB signaling pathway	GO:1901184	0.00869611	6.84541	2.06068	93	3623	38	18911	PTPN3,TGFA,GPRC5A,ERRFI1,EGFR,PTK6,DUSP3,AGR2,BTC,AFAP1L2,PTPN12,ERBB2,AREG,CBLC,ZGPAT,BCAR3,RHBDF1,DAB2IP,CEACAM1,SH3TC2,MMP9,LGMN,RHBDF2,EPN1,PTPRJ,HIP1R,EGF,HGS,HAP1,PSEN1,NEURL1,EPGN,ADORA1,SPRY1,HBEGF,PLAUR,ADAM17,EREG
TF	Factor: Zfx; motif: SNSCAGGCCKCGSCSS	TF:M01593	0.00896219	6.80193	2.04759	4028	3550	897	18911	CTSV,LAMA5,CELSR1,RIPK4,KRT80,EFNA1,HSPA1A,HSPA1B,DDX27,BAIAP2,ADGRG1,PIP4K2C,IGSF3,P2RY2,PKP3,PLEKHG3,MYO5B,GRB7,PTPRF,PATJ,KRT15,ARHGAP39,LAPTM4B,TFAP2C,CDS1,LLGL2,B3GNT5,MAP7,VAPB,TSPAN13,PCDH1,PMEPA1,ESRP1,ACOT4,AGRN,EFNA5,SFN,PERP,CEP170B,TACSTD2,TMEM30B,BCAP31,PRSS22,RCE1,CARD10,WNT9A,GET4,SSH3,CMTM4,SHB,STAU1,SLC2A4RG,GRHL1,RAP1GAP,PLEKHG6,MAB21L4,TFAP2A,INHBB,CLDN7,KLF5,CITED4,G6PD,SPIRE2…
REAC	Metabolism of lipids	REAC:R-HSA-556833	0.00919493	6.76495	2.03645	722	4737	232	18911	PLPP2,PIP4K2C,TNFRSF21,CDS1,PON3,ETNK2,VAPB,STARD10,ACOT4,ABCC3,GRHL1,SLC22A5,GPAT3,LIPH,ACP6,SPTSSB,EHHADH,PLEKHA6,PON2,NSDHL,OSBPL2,SLC44A3,PTGES,PLEKHA5,CYP1A1,ACSL3,ELOVL7,ALDH3B2,PRKAA2,B3GALNT1,ME1,DHCR24,PEX11A,CHKA,FA2H,PLBD1,DHCR7,GPD2,CYP24A1,PLA2G10,PTGR1,LPIN3,ALDH3B1,HACD2,PLEKHA1,SPTSSA,HSD11B2,FITM2,ORMDL2,NCOA6,PIK3CB,OCRL,AHR,CYP4B1,PITPNM3,ACER3,SRD5A1,PPARG,MBOAT1,HELZ2,RXRA,CY…
GO:CC	supramolecular fiber	GO:0099512	0.00932871	6.74411	2.03018	902	653	67	18911	KRT8,SHTN1,KRT80,KRT18,PPL,BAIAP2,FAM83H,SDC4,KRT15,AIF1L,MYH14,MAP7,KLC3,KRT7,CEP170B,CTTN,KRT4,PLS1,WASL,PKP2,KIFC3,DNAH14,AURKA,KRT19,LMNA,DSP,NCKAP1,JUP,BFSP1,MISP,KIF21A,EVPL,HID1,COBL,EPPK1,PLEC,HOOK1,OBSL1,FHDC1,MTUS1,EIF6,MYO6,SVIL,RAC1,DST,TNNT1,ESPN,SLC2A1,CARMIL1,CAMSAP3,FAM110C,MID2,KIF3B,GAS8,YES1,SQSTM1,SHANK2,KRT78,DAG1,TTC30A,MYZAP,PLS3,MAPRE3,MID1,SYNM,PSEN2,RYR1
GO:BP	embryonic organ morphogenesis	GO:0048562	0.00959162	6.70401	2.01811	300	4953	115	18911	CELSR1,EFNA1,SLC39A1,HES1,WNT9A,OVOL2,SIX4,PLS1,TFAP2A,GRHL2,EPHA2,ALDH1A3,MYO6,SCRIB,FOLR1,LRIG3,ATP6V1B1,LHX1,FGFR2,PCGF2,FZD6,YAP1,SIX1,EPHB2,SLC9A3R1,HOXA3,EDN1,RNF207,MESP1,GRHL3,ZIC1,NTN1,HOXC11,CCDC40,CCDC103,MYO7A,HOXB7,FZD5,MDFI,TEAD2,OTX1,HOXA2,STRA6,SOX9,DLL1,WHRN,FOXL2,BMP7,USH1G,SIX2,MAFB,GJB6,HPN,FOXE1,EFEMP1,HOXD10,SLITRK6,LHFPL5,GATA4,VANGL2,NIPBL,GATA2,RARG,WNT3A,PAX6,HOXB9,DLG1,…
TF	Factor: SNA; motif: NNRGCAGGTGCNNNN	TF:M10528	0.00971101	6.68616	2.01274	4304	1807	526	18911	TSPAN15,KIAA1522,LAMA5,TUFT1,RHPN2,WWC1,PPL,DDR1,CLDN4,FAM241B,MAL2,TOM1L1,FAM83H,IGSF3,P2RY2,BCAM,PKP3,RASEF,SPR,MYO5B,EEF1A2,EPCAM,ARHGEF16,EPB41L1,F11R,PTPRF,PATJ,TNFRSF21,WNT7B,CYB561,FOXA1,KIAA1671,SCNN1A,MAP7,VWA1,IQANK1,TSPAN13,PCDH1,C19ORF33,LYPD3,CGN,ESRP2,ST6GALNAC2,CEP170B,CDH1,TMEM54,TRIM47,CLDN1,BCAP31,SYT12,JAG2,ZNF185,ATP1B1,ABCC3,SSH3,LSR,CDC42BPG,TJP1,CMTM4,ZNF205,GRHL1,REPS2,MAB…
TF	Factor: GKLF; motif: CCTCCYN; match class: 1	TF:M01835_1	0.00976285	6.67848	2.01042	9671	3532	2031	18911	KIAA1522,CTSV,KRT8,TMEM184A,KRT80,BAIAP2L1,SOX13,MLF1,HSPA1B,WWC1,DDR1,CLDN4,FAM241B,BAIAP2,ADGRG1,MAL2,TOM1L1,TLCD1,PLPP2,FAM83H,IGSF3,P2RY2,BCAM,PKP3,PLEKHG3,RAB5IF,PDGFB,RASEF,PRXL2A,CCNJL,ELF3,MYO5B,EEF1A2,EPCAM,ARHGEF16,EPB41L1,PAK4,GRB7,F11R,WFDC2,PTPRF,PATJ,TNFRSF21,KRT15,AIF1L,MYH14,ARHGAP39,CYB561,ITGB4,CDS1,LLGL2,FOXA1,KIAA1671,SCNN1A,VWA1,ETNK2,PCDH1,C19ORF33,LYPD3,PMEPA1,ESRP2,ESRP1,K…
GO:BP	multicellular organismal homeostasis	GO:0048871	0.00978657	6.67498	2.00937	533	4394	170	18911	CLDN4,MYO5B,F11R,SCNN1A,MET,ITGB6,SFN,CLDN1,LSR,TJP1,GRHL1,CDH3,SLC22A5,ID1,NANOS1,GCNT2,KDF1,CLDN3,OCLN,EGFR,LTBP3,INAVA,CXADR,PTGES,CHMP4B,ADGRV1,RAC1,SLC2A1,PRKAA2,PPP1R13L,IL18,CLDN12,FA2H,WWTR1,TJP3,ATP6V1B1,ATP6AP1,LCN2,TMEM79,FOXC1,NMU,CYP26B1,LGR4,YAP1,KRT16,HOXC10,SRC,AQP3,ACHE,CTSH,CEBPB,GRHL3,RHEB,PDK4,WFS1,BSCL2,RAC3,ADIPOR1,IL20RB,ZG16B,ZBTB7B,YBX2,SOX9,RAB3D,DLL1,HOMER2,GADD45G,IGF1…
TF	Factor: GLIS2; motif: GACCCCCCGCRANG	TF:M03904	0.00984568	6.66629	2.00675	139	3519	53	18911	KIAA1522,GPRC5C,STON2,GRHL1,PLEKHA7,OBSL1,INHA,AGAP1,APP,SQSTM1,RAE1,GTF2IRD1,MMP15,SKIL,EPHX4,HSD11B2,ARTN,PITPNM3,KCTD1,RXRA,LYPD6,RUSC1,LEKR1,PIH1D2,NPTXR,GNAL,FGFR4,PLXNB1,GAL,KLF10,PSMB3,CTDSPL,KLF11,USP31,GATA2,GATA5,NRG1,PRMT8,AQP5,MYO1C,KDM2A,IRX3,MPDZ,FAM81A,TRNP1,COL7A1,CAPS,SLC7A4,DNAJB6,UNC93B1,TLE3,ZNF16,RRAS
GO:MF	identical protein binding	GO:0042802	0.00996069	6.64954	2.00171	2041	2186	299	18911	SHTN1,SOX13,MAP3K13,CLDN4,BAIAP2,PIP4K2C,CHMP4C,PDGFB,RASEF,SDC4,GRB7,F11R,VWA1,PON3,VAPB,MET,MAP3K9,SFN,YIPF6,HES1,CDH1,S100A2,CLDN9,CLDN1,SDC1,SLC25A13,MIPOL1,HM13,GRHL1,RAP1GAP,TFAP2A,INHBB,CLDN7,KIFC3,G6PD,ID1,UPP1,LMNA,JUP,GIPC1,TPD52L1,ERBB3,NUDT14,STX1A,CLDN3,EGFR,DNTTIP1,NECTIN4,PON2,PARD3,DMRTA1,PTK6,PC,ALDH3A2,GALE,LTBR,HOOK1,NAXE,PSMA7,PACSIN3,CXADR,MAP3K21,ALDH1A3,CHMP4B,TRIM29,AGR2,M…
HP	Abnormal respiratory motile cilium physiology	HP:0012261	0.010049	6.6368	1.99788	32	4223	19	18911	GAS8,SPAG1,DNAH5,CCNO,TTC12,CCDC40,CCDC103,DNAAF5,HYDIN,CCDC151,DNAL1,DNAAF3,RSPH1,DNAI1,RSPH3,DNAAF4,DNAJB13,DRC1,LRRC6
TF	Factor: ZSCAN18; motif: TRRCGRCGNMCC	TF:M05432	0.0100655	6.63444	1.99717	3960	1851	491	18911	KIAA1522,CTSV,LAMA5,HSPA1A,HSPA1B,PPL,FAM241B,BAIAP2,PLPP2,FAM83H,P2RY2,BCAM,PKP3,PDGFB,CCNJL,EEF1A2,EPB41L1,WFDC2,PTPRF,PATJ,TNFRSF21,MAP7,ETNK2,IQANK1,VAPB,SOWAHC,C19ORF33,MAP3K9,ACOT4,AGRN,CEP170B,TMEM54,LAMB3,EPN3,CLDN1,BCAP31,SYT12,CLMN,LSR,GRAMD2A,SHB,MOCS3,SIX4,STAU1,GRHL1,PPP1R26,EPHX1,CAPN2,REPS2,PLEKHG6,INHBB,WASL,MPP3,DPM1,CITED4,TBC1D8,ADRM1,CDH3,ID1,UPP1,DLG5,DSP,NCKAP1,CUEDC1,SEMA4B…
GO:MF	galactosyltransferase activity	GO:0008378	0.010105	6.62878	1.99546	27	4560	17	18911	C1GALT1C1L,B3GALNT1,B4GALT5,ABO,B3GALT5,WDFY3,C1GALT1C1,B3GALT4,UGT8,B4GALT1,PLOD3,A4GALT,B4GALT4,B3GNT6,C1GALT1,B4GALT3,A3GALT2
GO:BP	regulation of signal transduction	GO:0009966	0.010171	6.61939	1.99264	3055	4486	860	18911	TSPAN15,BAIAP2L1,EFNA1,SOX13,HSPA1A,HSPA1B,WWC1,MAP3K13,BAIAP2,ADGRG1,PIP4K2C,PDGFB,ELF3,ARHGEF16,F11R,WNT7B,TSKU,ARHGAP39,TSPAN6,LLGL2,FOXA1,MET,MAP3K9,PMEPA1,STARD10,HES1,CTTN,BCAP31,WNT9A,JAG2,OVOL2,PTPN3,TGFA,MARVELD3,RAP1GAP,INHBB,MUC1,CTNND1,AURKA,CDH3,ID1,GPAT3,DLG5,LMNA,GPRC5A,PLK2,GCNT2,JUP,CACNG4,ITGA3,GIPC1,TRIM16,TPD52L1,ERBB3,SEZ6L2,ERRFI1,STX1A,POR,EGFR,RYK,SCEL,EPS8L1,FAM83D,PTK6,P…
HP	Hypodontia	HP:0000668	0.0102442	6.60905	1.98952	169	269	12	18911	EEF1A2,ITGB4,PERP,CDH1,LAMB3,CLDN1,LAMC2,GRHL2,LMNA,KDF1,IRF6,LAMA3
GO:BP	positive regulation of protein tyrosine kinase activity	GO:0061098	0.0104202	6.58447	1.98212	60	3623	27	18911	EFNA1,PDGFB,TGFA,ERBB3,BTC,CD24,SRCIN1,AFAP1L2,GPRC5B,AREG,DOK7,SRC,PTPN1,EPHA4,DLG3,WNT3A,EGF,NRG1,DOCK3,NEURL1,EPGN,ADORA1,GRM5,PRNP,HBEGF,ADAM17,EREG
TF	Factor: pax-6; motif: NYACGCNYSANYGMNCN; match class: 1	TF:M11882_1	0.010499	6.57361	1.97885	10935	2098	1374	18911	TSPAN15,KIAA1522,CTSV,LAMA5,CELSR1,SHTN1,RIPK4,KRT80,BAIAP2L1,EFNA1,RHPN2,HSPA1A,MLF1,HSPA1B,WWC1,PPL,DDR1,CLDN4,BAIAP2,MAL2,TOM1L1,TLCD1,PIP4K2C,FAM83H,IGSF3,P2RY2,PKP3,CHMP4C,RAB5IF,PDGFB,RASEF,SPR,MYO5B,EEF1A2,EPCAM,SDC4,ARHGEF16,NHLRC1,GRB7,F11R,WFDC2,PATJ,TNFRSF21,AIF1L,ARHGAP39,CYB561,LAPTM4B,ANKEF1,TFAP2C,SLC39A1,CDS1,LLGL2,FOXA1,B3GNT5,MAP7,VWA1,PON3,ETNK2,IQANK1,KLC3,VAPB,MET,SOWAHC,PCDH…
GO:BP	chemotaxis	GO:0006935	0.0105079	6.57238	1.97848	648	3270	159	18911	LAMA5,EFNA1,PDGFB,ARHGEF16,GRB7,MET,EFNA5,RAP1GAP,LAMC2,CXCL16,YTHDF1,SEMA4B,SPTBN2,LAMA3,BCAR1,RYK,IGSF9,SEMA3E,EPHA2,STX3,L1CAM,CXADR,DUSP3,ARHGEF5,MTUS1,F2RL1,RAC1,SCRIB,S100A14,APP,S100A9,DAG1,ITGA2,ERBB2,OPHN1,LHX1,PLA2G10,MDK,PTK2,CMTM8,ARTN,PLXNA1,IL17RC,PIK3CB,NRCAM,EPHA1,TGFB2,NTN4,EFNB2,EPHB4,PLD1,EPHB2,RAB13,F3,LGALS3,SRC,CX3CL1,SEMA6B,WNT3,SEMA4C,EDN1,VSTM2L,ENAH,CXCL1,CXCL8,PLXNB3,PL…
[truncated: 252 more rows]

## Sheet: RNA.Negative.Corr.Aneuploid
source	term_name	term_id	adjusted_p_value	negative_log2_of_adjusted_p_value	negative_log10_of_adjusted_p_value	term_size	query_size	intersection_size	effective_domain_size	intersections
[truncated: 1,319 more rows]
