# Supplementary material for: Extensive protein dosage compensation in aneuploid human cancers
Source: HighWire-hosted journal article supplement (doi:10.1101/gr.276378.121), 2022-06-14
Supplement: Supplemental_Table_S11.xlsx [file Supplemental_Table_S11.xlsx]

## Sheet: Legend Table S11
Supplemental Table 11. Difference upon chromosome gain and loss, in cell lines with low and high cellular aneuploidy scores
1) Info- Information about collumn names and meaning for Supplemental Table 11
2) Difference low aneuploidy- Difference in RNA and protein expression upon chromosome gain or loss, in the quarter of cell lines with the lowest cellular aneuploidy score
3) Difference high aneuploidy- Difference in RNA and protein expression upon chromosome gain or loss, in the quarter of cell lines with the highest cellular aneuploidy score

## Sheet: Info
Difference upon chromosome gain and loss, in cell lines with low and high cellular aneuploidy scores
Difference data per gene, for RNA and protein expression differences (log2 fold change) upon the gain or loss of the chromosome arm the gene is located on.
Sheet	Information
Difference Low Aneuploidy	Difference in RNA and protein expression upon chromosome gain or loss, in the quarter of cell lines with the lowest cellular aneuploidy score
Difference High Aneuploidy	Difference in RNA and protein expression upon chromosome gain or loss, in the quarter of cell lines with the highest cellular aneuploidy score
Column name	Information
Gene_Symbol	Gene Symbol
RNA.Pvalue.Gain	P-value associated with difference in expression upon chromosome arm gain, for RNA values
RNA.Difference.Gain	Difference in RNA expression (log2 fold change) between cells with a chromosome arm gain vs those with neutral arm ploidy
RNA.Pvalue.Loss	P-value associated with difference in expression upon chromosome arm loss, for RNA values
RNA.Difference.Loss	Difference in RNA expression (log2 fold change) between cells with a chromosome arm loss vs those with neutral arm ploidy
RNA.Pvalue.Gain vs Loss	P-value associated with difference in expression between cells with chromosome arm gain and loss, for RNA values
RNA.Difference Gain vs Loss	Difference in RNA expression (log2 fold change) between cells with a chromosome arm gain vs those a chromosome arm loss
Protein_ID	UniProt ID
Protein.Pvalue.Gain	P-value associated with difference in expression upon chromosome arm gain, for Protein values
Protein.Difference.Gain	Difference in Protein expression (log2 fold change) between cells with a chromosome arm gain vs those with neutral arm ploidy
Protein.Pvalue.Loss	P-value associated with difference in expression upon chromosome arm loss, for Protien values
Protein.Diff.Loss	Difference in Protein expression (log2 fold change) between cells with a chromosome arm loss vs those with neutral arm ploidy
Protein.Pvalue.Gain vs Loss	P-value associated with difference in expression between cells with chromosome arm gain and loss, for Protein values
Protein.Difference.Gain vs Loss	Difference in Protein expression (log2 fold change) between cells with a chromosome arm gain vs those a chromosome arm loss
RNA.Gain.Difference.Category	Difference category for RNA upon chromosome arm gain
RNA.Loss.Difference.Category	Difference category for RNA upon chromosome arm loss
Protein.Gain.Difference.Category	Difference category for protein upon chromosome arm gain
Protein.Loss.Difference.Category	Difference category for protein upon chromosome arm loss

## Sheet: Difference Low Aneuploidy
Gene_Symbol	RNA.Pvalue.Gain	RNA.Difference.Gain	RNA.Pvalue.Loss	RNA.Difference.Loss	RNA.Pvalue.Gain vs Loss	RNA.Difference Gain vs Loss	Protein_ID	Protein.Pvalue.Gain	Protein.Difference.Gain	Protein.Pvalue.Loss	Protein.Diff.Loss	Protein.Pvalue.Gain vs Loss	Protein.Difference.Gain vs Loss	RNA.Gain.Difference.Category	RNA.Loss.Difference.Category	Protein.Gain.Difference.Category	Protein.Loss.Difference.Category
AAAS	0.218509	0.296024	0.144274	-0.327975	0.048565	0.623999	sp.Q9NRG9.AAAS_HUMAN	0.757046	-0.072867	0.416373	0.414679	0.364989	-0.487546	Scaling	Scaling	Buffering	Anti-Scaling
AACS	0.155791	0.828561	0.476198	-0.253586	0.0976363	1.08215	sp.Q86V21.AACS_HUMAN	0.504482	0.407547	0.475445	0.311798	0.88755	0.0957491	Scaling	Scaling	Scaling	Anti-Scaling
AAK1	0.437874	0.471077	0.517877	0.352254	0.872167	0.118824	sp.Q2M2I8.AAK1_HUMAN	0.404928	0.500194	0.335488	0.410297	0.89084	0.0898968	Scaling	Anti-Scaling	Scaling	Anti-Scaling
AAMDC	0.261833	-0.328421	0.6689	0.141578	0.259473	-0.469999	sp.Q9H7C9.AAMDC_HUMAN	0.723103	0.221878	0.861219	0.0724829	0.835018	0.149395	Anti-Scaling	Anti-Scaling	Buffering	Buffering
AARS	0.783338	-0.175696	0.202564	-0.293015	0.859175	0.117319	sp.P49588.SYAC_HUMAN	0.8972	-0.0365112	0.418586	-0.192434	0.651134	0.155923	Anti-Scaling	Scaling	Buffering	Buffering
AASDHPPT	0.280763	0.24726	0.00959333	-0.62617	0.00740079	0.87343	sp.Q9NRN7.ADPPT_HUMAN	0.463109	0.256701	0.11494	-0.5274	0.0933831	0.784101	Buffering	Scaling	Scaling	Scaling
ABAT	0.404204	1.25536	0.0231527	-0.798264	0.224183	2.05363	sp.P80404.GABT_HUMAN	0.327021	1.34757	0.000420571	-1.39099	0.113924	2.73856	Scaling	Scaling	Scaling	Scaling
ABCA1	0.354495	0.708479	0.690956	0.272877	0.649616	0.435603	sp.O95477.ABCA1_HUMAN	0.663205	0.255452	0.289847	-0.639257	0.261285	0.894709	Scaling	Anti-Scaling	Scaling	Scaling
ABCA2	0.448401	0.358327	0.21828	-0.747965	0.128361	1.10629	sp.Q9BZC7.3.ABCA2_HUMAN	0.40346	-0.253012	0.44799	-0.267635	0.971357	0.0146231	Scaling	Scaling	Anti-Scaling	Scaling
ABCA3	0.563788	-0.510967	0.293395	-0.59794	0.926776	0.0869736	sp.Q99758.ABCA3_HUMAN	0.178633	-0.427024	0.582843	-0.1948	0.564963	-0.232224	Anti-Scaling	Scaling	Anti-Scaling	Buffering
ABCC1	0.552602	-0.0710718	0.0185727	-0.74723	0.0294121	0.676158	sp.P33527.MRP1_HUMAN	0.0570556	0.51656	0.0176036	-0.824835	0.00199198	1.3414	Buffering	Scaling	Scaling	Scaling
ABCC4	0.340646	-0.511028	0.457685	-0.301499	0.737206	-0.209528	sp.O15439.MRP4_HUMAN	0.914485	0.0437007	0.363088	-0.294039	0.489801	0.337739	Anti-Scaling	Scaling	Buffering	Scaling
ABCD4	0.124282	0.477191	0.00352458	-0.833663	0.00269453	1.31085	sp.O14678.ABCD4_HUMAN	0.941289	0.0373764	0.433827	0.303633	0.659225	-0.266257	Scaling	Scaling	Buffering	Anti-Scaling
ABHD12	0.16382	0.316134	0.325627	-0.35675	0.104546	0.672883	sp.Q8N2K0.ABD12_HUMAN	0.157497	0.353754	0.280883	-0.282724	0.0648055	0.636478	Scaling	Scaling	Scaling	Scaling
ABHD13	0.0278374	0.498278	0.025274	-0.431845	0.0014282	0.930123	sp.Q7L211.ABHDD_HUMAN	0.494156	0.312092	0.00280754	-0.593039	0.0865994	0.905131	Scaling	Scaling	Scaling	Scaling
ABHD17B	0.449798	-0.0969227	0.0302257	-0.61796	0.0555561	0.521037	sp.Q5VST6.2.AB17B_HUMAN	0.846408	0.0278594	0.340565	-0.244174	0.307723	0.272033	Buffering	Scaling	Buffering	Buffering
ABI1	0.62662	0.111973	0.00123304	-0.533679	0.0316335	0.645651	sp.Q8IZP0.9.ABI1_HUMAN	0.124755	-0.342658	0.00109832	-0.654391	0.2112	0.311733	Buffering	Scaling	Anti-Scaling	Scaling
ABL1	0.0346964	-0.230822	0.377532	-0.335494	0.773908	0.104672	sp.P00519.2.ABL1_HUMAN	0.0904278	-0.312436	0.683047	-0.170989	0.744575	-0.141446	Anti-Scaling	Scaling	Anti-Scaling	Buffering
ABR	0.183807	0.573416	0.164233	-0.560057	0.0395589	1.13347	sp.Q12979.ABR_HUMAN	0.993315	0.00349619	0.392146	-0.297011	0.557003	0.300507	Scaling	Scaling	Buffering	Scaling
ABRACL	0.827043	-0.507387	0.338316	-0.338998	0.942143	-0.168389	sp.Q9P1F3.ABRAL_HUMAN	0.713783	0.604586	0.0890851	0.807973	0.901731	-0.203387	Anti-Scaling	Scaling	Scaling	Anti-Scaling
ACACB	0.372351	0.458659	0.522961	-0.306285	0.249667	0.764944	sp.O00763.ACACB_HUMAN	0.901203	-0.0463263	0.779966	0.186704	0.750186	-0.23303	Scaling	Scaling	Buffering	Anti-Scaling
ACAD10	0.153059	0.530939	0.571849	-0.164219	0.119675	0.695158	sp.Q6JQN1.5.ACD10_HUMAN	0.954288	0.0218554	0.360496	-0.470922	0.39974	0.492777	Scaling	Buffering	Buffering	Scaling
ACAD8	0.0573333	0.367358	0.127655	-0.57763	0.0265336	0.944988	sp.Q9UKU7.ACAD8_HUMAN	0.587415	0.120418	0.556991	-0.263022	0.428135	0.383441	Scaling	Scaling	Buffering	Scaling
ACADS	0.00136321	1.53097	0.11025	-0.481677	0.000980795	2.01264	sp.P16219.ACADS_HUMAN	0.0314712	2.02895	0.536724	-0.485658	0.0378562	2.51461	Scaling	Scaling	Scaling	Scaling
ACADVL	0.0338763	0.446816	0.00869558	-0.807301	0.000671814	1.25412	sp.P49748.3.ACADV_HUMAN	0.714695	0.105948	0.0551887	-0.542389	0.101344	0.648337	Scaling	Scaling	Buffering	Scaling
ACAT1	0.0223749	0.525289	0.0192542	-1.03441	0.00218896	1.5597	sp.P24752.THIL_HUMAN	0.00375427	0.618301	0.0427588	-0.765318	0.00236975	1.38362	Scaling	Scaling	Scaling	Scaling
ACAT2	0.407754	0.446681	0.197492	-0.568488	0.13327	1.01517	sp.Q9BWD1.THIC_HUMAN	0.627616	0.142796	0.407769	0.175647	0.916515	-0.0328507	Scaling	Scaling	Buffering	Anti-Scaling
ACBD5	0.327605	0.28042	6.46736e-05	-0.664494	0.0131153	0.944914	sp.Q5T8D3.ACBD5_HUMAN	0.912409	0.0447882	0.00523224	-0.587779	0.17296	0.632567	Scaling	Scaling	Buffering	Scaling
ACBD7	0.892918	0.0594909	0.0178534	-0.83584	0.103267	0.89533	sp.Q8N6N7.ACBD7_HUMAN	0.475296	0.459461	0.000681639	-1.46682	0.0222508	1.92628	Buffering	Scaling	Scaling	Scaling
ACD	0.0262735	0.654233	0.000733532	-0.804669	0.000265431	1.4589	sp.Q96AP0.ACD_HUMAN	0.360358	0.163187	0.386846	-0.262295	0.201973	0.425482	Scaling	Scaling	Buffering	Scaling
ACIN1	0.254614	0.407397	0.0216487	-0.832059	0.013995	1.23946	tr.E7EQT4.E7EQT4_HUMAN	0.894618	-0.0316268	7.72806e-05	-0.831347	0.0171214	0.79972	Scaling	Scaling	Buffering	Scaling
ACIN1	0.254614	0.407397	0.0216487	-0.832059	0.013995	1.23946	sp.Q9UKV3.5.ACINU_HUMAN	0.9454	-0.0142896	6.35104e-05	-0.73772	0.0147799	0.723431	Scaling	Scaling	Buffering	Scaling
ACO1	0.41688	0.601163	0.302056	0.308614	0.692646	0.292549	sp.P21399.ACOC_HUMAN	0.76171	0.134248	0.222346	0.268756	0.775373	-0.134509	Scaling	Anti-Scaling	Buffering	Anti-Scaling
ACOT2	0.835082	0.197168	0.836658	0.0618374	0.887331	0.135331	sp.P49753.ACOT2_HUMAN	0.537678	0.277742	0.668158	-0.0991538	0.425318	0.376896	Buffering	Buffering	Scaling	Buffering
ACOT4	0.75638	0.109148	4.52405e-05	-0.483709	0.139143	0.592857	sp.Q8N9L9.ACOT4_HUMAN	0.458392	0.489458	0.467413	-0.308859	0.277793	0.798317	Buffering	Scaling	Scaling	Scaling
ACP1	0.461366	0.259346	0.0426091	-0.592549	0.0635773	0.851894	sp.P24666.PPAC_HUMAN	0.723354	-0.217468	0.878064	-0.0626807	0.824262	-0.154788	Scaling	Scaling	Anti-Scaling	Buffering
ACP1	0.461366	0.259346	0.0426091	-0.592549	0.0635773	0.851894	sp.P24666.2.PPAC_HUMAN	0.93289	-0.0388806	0.80578	-0.20671	0.849838	0.167829	Scaling	Scaling	Buffering	Buffering
ACSF3	0.220728	-0.304138	0.0522559	-0.640534	0.349889	0.336396	sp.Q4G176.ACSF3_HUMAN	0.611458	0.112683	0.0341416	-0.418455	0.0609472	0.531138	Anti-Scaling	Scaling	Buffering	Scaling
ACSM3	0.336253	1.73283	0.316275	0.941169	0.654083	0.791661	sp.Q53FZ2.ACSM3_HUMAN	0.487256	0.937997	0.296788	0.625808	0.815976	0.312189	Scaling	Anti-Scaling	Scaling	Anti-Scaling
ACSS1	0.0283172	-1.15144	0.0937555	-1.08533	0.925862	-0.0661118	sp.Q9NUB1.ACS2L_HUMAN	0.0827912	-0.796924	0.0329812	-1.15954	0.555152	0.362618	Anti-Scaling	Scaling	Anti-Scaling	Scaling
ACTB	0.320566	0.190868	0.197957	-0.413536	0.091332	0.604404	sp.P60709.ACTB_HUMAN	0.0540194	0.217262	0.478622	0.198364	0.945787	0.0188971	Buffering	Scaling	Buffering	Anti-Scaling
ACTN1	0.574343	-0.766543	0.0182384	0.894798	0.257342	-1.66134	sp.P12814.4.ACTN1_HUMAN	0.627214	-0.265488	0.000309373	0.742712	0.113802	-1.0082	Anti-Scaling	Anti-Scaling	Anti-Scaling	Anti-Scaling
ACTN1	0.574343	-0.766543	0.0182384	0.894798	0.257342	-1.66134	sp.P12814.ACTN1_HUMAN	0.624811	-0.357558	0.000848212	1.12772	0.0894023	-1.48527	Anti-Scaling	Anti-Scaling	Anti-Scaling	Anti-Scaling
ACTN4	0.5195	0.359337	0.560674	-0.475672	0.379854	0.835009	sp.O43707.ACTN4_HUMAN	0.376535	0.25874	0.496526	-0.37108	0.301078	0.629819	Scaling	Scaling	Scaling	Scaling
ACTR10	0.147948	0.466379	0.373067	0.16895	0.367685	0.297428	sp.Q9NZ32.ARP10_HUMAN	0.992686	-0.00290129	0.0228924	0.286201	0.391567	-0.289102	Scaling	Anti-Scaling	Buffering	Anti-Scaling
ACTR2	0.297456	0.411522	0.389214	-0.525079	0.187949	0.936601	sp.P61160.ARP2_HUMAN	0.641905	-0.104219	0.641455	-0.139011	0.919061	0.0347921	Scaling	Scaling	Anti-Scaling	Buffering
ACTR6	0.0383642	0.768784	0.253034	-0.429057	0.024691	1.19784	sp.Q9GZN1.ARP6_HUMAN	0.907281	0.0333441	0.423954	0.247416	0.577576	-0.214072	Scaling	Scaling	Buffering	Anti-Scaling
ACYP1	0.532289	0.405127	0.0751714	-0.783046	0.130593	1.18817	sp.P07311.ACYP1_HUMAN	0.472175	0.614716	0.124993	-0.775053	0.161773	1.38977	Scaling	Scaling	Scaling	Scaling
ACYP2	0.164413	0.51938	0.175371	0.344	0.631727	0.17538	sp.P14621.ACYP2_HUMAN	0.978066	0.00934369	0.531402	0.451702	0.562516	-0.442359	Scaling	Anti-Scaling	Buffering	Anti-Scaling
ADAM17	0.615775	0.227384	0.117106	-0.772852	0.113868	1.00024	sp.P78536.ADA17_HUMAN	0.23319	0.380102	0.442657	-0.178812	0.135135	0.558914	Buffering	Scaling	Scaling	Buffering
ADAM28	0.0633518	1.03166	0.330524	0.428427	0.351728	0.603234	sp.Q9UKQ2.ADA28_HUMAN	0.128568	-1.61286	0.76045	0.479038	0.263773	-2.0919	Scaling	Anti-Scaling	Anti-Scaling	Anti-Scaling
ADAM9	0.0918125	-0.858073	0.399116	0.361046	0.0477619	-1.21912	sp.Q13443.ADAM9_HUMAN	0.0671995	-0.756288	0.843864	0.0661819	0.0909143	-0.82247	Anti-Scaling	Anti-Scaling	Anti-Scaling	Buffering
ADAP1	0.500004	0.37896	0.00230733	-2.06563	0.00084605	2.44459	sp.O75689.ADAP1_HUMAN	0.954504	0.0201089	0.0535349	-1.23142	0.0500111	1.25153	Scaling	Scaling	Buffering	Scaling
ADAT1	0.445329	0.333229	0.0274491	-0.714354	0.0551153	1.04758	sp.Q9BUB4.ADAT1_HUMAN	0.129872	0.386243	0.289187	-0.267009	0.0553574	0.653252	Scaling	Scaling	Scaling	Scaling
ADAT2	0.424944	0.539778	0.0337815	-0.805695	0.109452	1.34547	sp.Q7Z6V5.ADAT2_HUMAN	0.322131	0.487709	0.421583	0.333973	0.781096	0.153736	Scaling	Scaling	Scaling	Anti-Scaling
ADCK1	0.00738031	0.593472	0.0138733	-0.748641	0.000514633	1.34211	sp.Q86TW2.ADCK1_HUMAN	0.48357	0.156154	0.519376	0.192358	0.912728	-0.0362035	Scaling	Scaling	Buffering	Anti-Scaling
ADCY3	0.700099	-0.531005	0.270262	-0.244145	0.834161	-0.286861	sp.O60266.ADCY3_HUMAN	0.355721	0.490735	0.812086	-0.097846	0.351508	0.588581	Anti-Scaling	Buffering	Scaling	Buffering
ADCY9	0.926145	0.122625	0.0114963	-1.12334	0.399373	1.24596	sp.O60503.ADCY9_HUMAN	0.438896	0.303994	0.0672426	-0.638319	0.0724859	0.942312	Buffering	Scaling	Scaling	Scaling
ADD2	0.0184463	-1.27392	0.940398	0.0849227	0.284142	-1.35884	sp.P35612.ADDB_HUMAN	0.234792	-0.937984	0.704555	0.456494	0.31852	-1.39448	Anti-Scaling	Buffering	Anti-Scaling	Anti-Scaling
ADI1	0.461587	0.170595	0.896547	-0.0262961	0.486933	0.196891	sp.Q9BV57.MTND_HUMAN	0.479807	-0.256667	0.633291	0.280157	0.419843	-0.536823	Buffering	Buffering	Anti-Scaling	Anti-Scaling
ADSSL1	0.863314	-0.0976191	0.000675271	-1.0575	0.141376	0.959883	sp.Q8N142.PURA1_HUMAN	0.908223	0.0295737	0.121419	-0.625433	0.140287	0.655007	Buffering	Scaling	Buffering	Scaling
AEBP1	0.645687	-0.253019	0.224385	2.3212	0.188806	-2.57422	sp.Q8IUX7.AEBP1_HUMAN	0.697957	-0.246663	0.760261	-0.168722	0.917507	-0.0779411	Anti-Scaling	Anti-Scaling	Anti-Scaling	Buffering
AFG3L2	0.486639	0.229333	0.0256232	-0.952919	0.0234644	1.18225	sp.Q9Y4W6.AFG32_HUMAN	0.187603	0.403694	0.00436778	-0.662499	0.0113547	1.06619	Buffering	Scaling	Scaling	Scaling
AFTPH	0.500702	-0.131918	0.33085	-0.318226	0.586155	0.186308	sp.Q6ULP2.AFTIN_HUMAN	0.280891	-0.289677	0.911577	0.0470783	0.483533	-0.336756	Anti-Scaling	Scaling	Anti-Scaling	Buffering
AGPAT2	0.0851398	0.554134	0.839256	-0.104402	0.261535	0.658536	sp.O15120.PLCB_HUMAN	0.0513162	0.453224	0.931119	-0.0498717	0.411698	0.503096	Scaling	Buffering	Scaling	Buffering
AGPAT5	0.0339225	0.377671	1.98112e-06	-1.0032	3.66386e-07	1.38087	sp.Q9NUQ2.PLCE_HUMAN	0.839725	0.0631237	2.03948e-07	-0.690399	0.0280067	0.753522	Scaling	Scaling	Buffering	Scaling
AGR2	0.16343	1.29346	0.00265597	-1.50682	0.00288134	2.80027	sp.O95994.AGR2_HUMAN	0.245	0.5927	0.0237343	-0.891148	0.00812403	1.48385	Scaling	Scaling	Scaling	Scaling
AGR3	0.234162	0.740999	0.000837293	-0.636355	0.0266635	1.37735	sp.Q8TD06.AGR3_HUMAN	0.811095	0.179105	0.225953	-0.717435	0.288312	0.89654	Scaling	Scaling	Buffering	Scaling
AGTPBP1	0.482095	-0.385096	0.0284064	-0.570898	0.739118	0.185802	sp.Q9UPW5.CBPC1_HUMAN	0.437002	-0.227396	0.171814	-0.357667	0.707414	0.130271	Anti-Scaling	Scaling	Anti-Scaling	Scaling
AHNAK	0.344845	-1.1209	0.289715	0.897557	0.151596	-2.01846	sp.Q09666.AHNK_HUMAN	0.892631	-0.0778702	0.22687	0.583225	0.352945	-0.661095	Anti-Scaling	Anti-Scaling	Buffering	Anti-Scaling
AHNAK	0.344845	-1.1209	0.289715	0.897557	0.151596	-2.01846	sp.Q09666.2.AHNK_HUMAN	0.744303	-0.201753	0.215923	1.23162	0.172764	-1.43337	Anti-Scaling	Anti-Scaling	Anti-Scaling	Anti-Scaling
AHNAK2	0.27535	1.08427	0.012509	2.25522	0.304543	-1.17095	sp.Q8IVF2.AHNK2_HUMAN	0.289083	0.645465	0.00586412	2.03298	0.0851258	-1.38752	Scaling	Anti-Scaling	Scaling	Anti-Scaling
AHR	0.00325912	1.23224	0.445344	-0.741437	0.092415	1.97368	sp.P35869.AHR_HUMAN	0.0564405	0.5788	0.448549	-0.640625	0.194429	1.21942	Scaling	Scaling	Scaling	Scaling
AHSA1	0.0230429	0.467108	0.209749	-0.336228	0.0160895	0.803336	sp.O95433.AHSA1_HUMAN	0.516246	0.180224	0.0503224	-0.753962	0.0396053	0.934186	Scaling	Scaling	Buffering	Scaling
AIF1L	0.993261	-0.00383416	0.354009	-0.884461	0.3745	0.880627	sp.Q9BQI0.AIF1L_HUMAN	0.641195	0.307072	0.693888	-0.274989	0.517927	0.582061	Buffering	Scaling	Scaling	Scaling
AIMP2	0.00995332	0.39787	0.0063227	-0.575544	8.51959e-05	0.973414	sp.Q13155.AIMP2_HUMAN	0.999132	-9.88051e-05	0.185214	-0.260709	0.19217	0.26061	Scaling	Scaling	Buffering	Scaling
AIP	0.0271756	0.634469	0.0775817	0.466584	0.592036	0.167886	sp.O00170.AIP_HUMAN	0.34375	0.433144	0.204328	0.340495	0.848814	0.092649	Scaling	Anti-Scaling	Scaling	Anti-Scaling
AJUBA	0.74746	-0.362906	0.217914	0.735127	0.379153	-1.09803	sp.Q96IF1.AJUBA_HUMAN	0.515127	-0.212333	0.555889	0.329663	0.379676	-0.541996	Anti-Scaling	Anti-Scaling	Anti-Scaling	Anti-Scaling
AK1	0.0582366	0.889326	0.860749	-0.0839369	0.119986	0.973263	sp.P00568.KAD1_HUMAN	0.196037	0.450978	0.694835	0.129472	0.437713	0.321506	Scaling	Buffering	Scaling	Anti-Scaling
AK3	0.529352	0.474338	0.0225108	-0.460688	0.256523	0.935026	sp.Q9UIJ7.KAD3_HUMAN	0.608012	0.414747	0.0500897	-0.410906	0.340257	0.825653	Scaling	Scaling	Scaling	Scaling
AKAP10	0.26925	0.765339	4.21299e-05	-0.799845	0.0834276	1.56518	sp.O43572.AKA10_HUMAN	0.110824	0.559436	0.183948	-0.215369	0.0386952	0.774806	Scaling	Scaling	Scaling	Buffering
AKAP11	0.773029	-0.0543584	0.0384569	-0.441023	0.135985	0.386665	sp.Q9UKA4.AKA11_HUMAN	0.529248	0.174861	0.0378899	-0.348243	0.0995321	0.523104	Buffering	Scaling	Buffering	Scaling
AKAP12	0.260222	-1.86811	0.633386	-0.455493	0.395147	-1.41262	sp.Q02952.AKA12_HUMAN	0.0299476	-1.74526	0.461436	0.497185	0.0147664	-2.24244	Anti-Scaling	Scaling	Anti-Scaling	Anti-Scaling
AKAP2	0.598528	-0.745912	5.13797e-07	1.53783	0.143545	-2.28374	sp.Q9Y2D5.6.AKAP2_HUMAN	0.884257	0.110319	0.00933485	0.965495	0.296472	-0.855175	Anti-Scaling	Anti-Scaling	Buffering	Anti-Scaling
AKAP5	0.739845	0.167105	0.135223	-0.280509	0.402895	0.447614	sp.P24588.AKAP5_HUMAN	0.168384	0.685544	0.615678	-0.15689	0.110556	0.842434	Buffering	Scaling	Scaling	Buffering
AKAP8	0.622658	0.224629	0.699942	-0.202164	0.515341	0.426793	sp.O43823.AKAP8_HUMAN	0.503175	0.454509	0.770682	-0.0638349	0.458005	0.518344	Buffering	Buffering	Scaling	Buffering
AKAP8L	0.0652052	0.4262	0.902669	-0.0877841	0.50447	0.513984	sp.Q9ULX6.AKP8L_HUMAN	0.543704	0.376288	0.775641	0.0705229	0.627493	0.305765	Scaling	Buffering	Scaling	Buffering
AKNA	0.709051	-0.105663	0.831648	-0.173145	0.934379	0.0674821	sp.Q7Z591.AKNA_HUMAN	0.94366	-0.0313826	0.50496	0.644823	0.504377	-0.676205	Anti-Scaling	Buffering	Buffering	Anti-Scaling
AKR1C1	0.566858	-0.672957	0.497143	-0.394738	0.817872	-0.278219	sp.Q04828.AK1C1_HUMAN	0.847992	-0.152446	0.501473	-0.225919	0.927349	0.0734728	Anti-Scaling	Scaling	Anti-Scaling	Buffering
AKR1C3	0.506558	-1.00967	0.392091	-0.520517	0.750153	-0.489151	sp.P42330.AK1C3_HUMAN	0.456078	-0.598574	0.0832204	-0.499193	0.89969	-0.0993814	Anti-Scaling	Scaling	Anti-Scaling	Scaling
AKT1	0.349784	0.238399	0.0288741	-0.71339	0.0171475	0.951789	sp.P31749.AKT1_HUMAN	0.656471	-0.216104	0.08623	-0.598549	0.493538	0.382445	Buffering	Scaling	Anti-Scaling	Scaling
AKT1S1	0.292821	0.28121	0.708856	-0.34406	0.519891	0.62527	sp.Q96B36.3.AKTS1_HUMAN	0.585416	0.130122	0.0217025	0.36851	0.339855	-0.238389	Scaling	Scaling	Buffering	Anti-Scaling
AKT2	0.193869	0.421689	0.550317	0.164546	0.50145	0.257143	sp.P31751.AKT2_HUMAN	0.964553	0.00953942	0.028743	0.730798	0.0272287	-0.721259	Scaling	Anti-Scaling	Buffering	Anti-Scaling
AKTIP	0.225494	0.415769	0.125262	-0.864218	0.0468329	1.27999	sp.Q9H8T0.2.AKTIP_HUMAN	0.141246	0.477964	0.837866	0.106919	0.508727	0.371046	Scaling	Scaling	Scaling	Anti-Scaling
ALAD	0.223723	0.173033	0.415979	0.544537	0.571956	-0.371504	sp.P13716.HEM2_HUMAN	0.0451354	-0.227309	0.654619	0.314204	0.451423	-0.541513	Buffering	Anti-Scaling	Anti-Scaling	Anti-Scaling
ALDH16A1	0.184293	0.458763	0.00159209	-1.11938	0.00218772	1.57814	sp.Q8IZ83.A16A1_HUMAN	0.235127	0.512166	0.0374867	-0.464403	0.0491038	0.976569	Scaling	Scaling	Scaling	Scaling
ALDH1A1	0.647938	-0.484488	0.534399	-0.753971	0.855725	0.269483	sp.P00352.AL1A1_HUMAN	0.00684026	-0.904496	0.918084	-0.112856	0.484937	-0.79164	Anti-Scaling	Scaling	Anti-Scaling	Buffering
ALDH1B1	0.920471	-0.124092	0.0231899	-0.632315	0.689776	0.508224	sp.P30837.AL1B1_HUMAN	0.965076	-0.0407429	0.225072	-0.315204	0.773527	0.274461	Anti-Scaling	Scaling	Buffering	Scaling
ALDH1L2	0.360987	1.45269	0.192017	1.48001	0.986722	-0.027323	sp.Q3SY69.AL1L2_HUMAN	0.117768	1.73001	0.730362	0.134281	0.140421	1.59573	Scaling	Anti-Scaling	Scaling	Anti-Scaling
ALDH2	0.38277	1.43708	0.788518	-0.475503	0.404594	1.91258	sp.P05091.ALDH2_HUMAN	0.248471	1.26471	0.831145	-0.364065	0.411237	1.62878	Scaling	Scaling	Scaling	Scaling
ALDH3A1	0.74086	-0.355587	0.0604743	-0.881414	0.634756	0.525827	sp.P30838.AL3A1_HUMAN	0.974607	0.0288824	0.316964	-0.276824	0.742364	0.305707	Anti-Scaling	Scaling	Buffering	Scaling
ALDH3A2	0.186498	1.14335	0.0174322	-1.58818	0.0148752	2.73153	sp.P51648.2.AL3A2_HUMAN	0.557075	0.529649	0.0159286	-0.659352	0.251898	1.189	Scaling	Scaling	Scaling	Scaling
ALDH3B1	0.661589	-0.397833	0.0509003	1.53892	0.0978459	-1.93676	sp.P43353.AL3B1_HUMAN	0.738632	-0.244082	0.251779	0.793254	0.285919	-1.03734	Anti-Scaling	Anti-Scaling	Anti-Scaling	Anti-Scaling
ALDH6A1	0.000982528	0.638047	0.0455124	-0.914443	0.00444912	1.55249	sp.Q02252.MMSA_HUMAN	0.161438	0.346781	0.0506972	-0.671474	0.0121997	1.01826	Scaling	Scaling	Scaling	Scaling
ALDOA	0.604223	0.209237	0.158037	-0.344883	0.245386	0.55412	sp.P04075.2.ALDOA_HUMAN	0.148587	-0.484851	0.590912	0.161252	0.107911	-0.646103	Buffering	Scaling	Anti-Scaling	Anti-Scaling
ALG1	0.328502	0.409041	0.0109261	-0.622993	0.0583771	1.03203	sp.Q9BT22.ALG1_HUMAN	0.247236	0.516597	0.016346	-0.575322	0.0517863	1.09192	Scaling	Scaling	Scaling	Scaling
ALG10	0.00753988	0.469756	0.494896	-0.129233	0.0269187	0.598988	sp.Q5BKT4.AG10A_HUMAN	0.534414	0.148639	0.0220532	-0.664473	0.0143222	0.813111	Scaling	Buffering	Buffering	Scaling
ALG11	0.883093	-0.031326	0.0193187	-0.455659	0.119719	0.424333	sp.Q2TAA5.ALG11_HUMAN	0.288803	0.456119	0.246159	-0.264715	0.131926	0.720834	Buffering	Scaling	Scaling	Scaling
ALG2	0.0166401	0.476332	0.542233	-0.274426	0.1443	0.750758	sp.Q9H553.ALG2_HUMAN	0.0244137	0.416288	0.6131	-0.271522	0.239121	0.68781	Scaling	Scaling	Scaling	Scaling
ALG5	0.169178	0.445314	0.0561456	-0.486585	0.0228421	0.931899	sp.Q9Y673.ALG5_HUMAN	0.175611	0.485384	0.0378774	-0.458268	0.0265841	0.943652	Scaling	Scaling	Scaling	Scaling
ALG8	0.0713404	0.309403	0.778041	-0.0875452	0.247899	0.396948	sp.Q9BVK2.ALG8_HUMAN	0.368135	-0.120368	0.91723	0.0125274	0.375628	-0.132895	Scaling	Buffering	Anti-Scaling	Buffering
ALG9	0.629907	0.112896	0.107286	-0.327639	0.137452	0.440534	sp.Q9H6U8.3.ALG9_HUMAN	0.478864	0.304258	0.108474	-0.315224	0.188235	0.619482	Buffering	Scaling	Scaling	Scaling
ALKBH1	0.00464781	0.6911	0.00479147	-0.5902	6.4069e-05	1.2813	sp.Q13686.ALKB1_HUMAN	0.303077	0.303405	0.0399294	-0.492353	0.0382914	0.795758	Scaling	Scaling	Scaling	Scaling
ALKBH2	0.558384	0.259278	0.140592	-0.66466	0.116589	0.923938	sp.Q6NS38.ALKB2_HUMAN	0.570486	0.257119	0.188976	-1.02462	0.124162	1.28174	Scaling	Scaling	Scaling	Scaling
ALKBH5	0.484944	0.262676	0.00107248	-0.602694	0.0879402	0.86537	sp.Q6P6C2.ALKB5_HUMAN	0.92252	-0.0312715	0.0968265	-0.237006	0.548798	0.205735	Scaling	Scaling	Buffering	Buffering
ALKBH8	0.0507224	0.52155	0.369242	-0.262341	0.0384643	0.783891	sp.Q96BT7.4.ALKB8_HUMAN	0.682501	0.0935369	0.0631034	-0.649438	0.0587948	0.742975	Scaling	Scaling	Buffering	Scaling
ALMS1	0.245915	0.525242	0.234827	-0.370876	0.0949753	0.896118	sp.Q8TCU4.ALMS1_HUMAN	0.752354	0.169844	0.749098	-0.106024	0.647854	0.275868	Scaling	Scaling	Buffering	Buffering
AMDHD2	0.244049	0.564701	0.00280852	-0.757482	0.0411236	1.32218	sp.Q9Y303.3.NAGA_HUMAN	0.65367	0.192175	0.423642	0.14393	0.911262	0.048245	Scaling	Scaling	Buffering	Anti-Scaling
AMER2	0.619414	0.196845	0.0997486	-0.167866	0.356454	0.364711	sp.Q8N7J2.AMER2_HUMAN	0.317707	0.882307	0.217478	-0.496086	0.141577	1.37839	Buffering	Buffering	Scaling	Scaling
AMFR	0.879249	0.0218436	0.0619349	-0.725573	0.0597033	0.747417	sp.Q9UKV5.AMFR_HUMAN	0.629327	0.0823298	0.104737	-0.3265	0.0979965	0.40883	Buffering	Scaling	Buffering	Scaling
AMOTL1	0.918017	-0.111834	0.476229	0.442356	0.643826	-0.55419	sp.Q8IY63.AMOL1_HUMAN	0.776451	0.195102	0.697305	-0.121747	0.66145	0.316849	Anti-Scaling	Anti-Scaling	Buffering	Buffering
AMPH	0.164646	0.553468	0.00664283	-0.396325	0.0157412	0.949792	sp.P49418.AMPH_HUMAN	0.708659	-0.106575	0.412394	-0.774916	0.477855	0.668341	Scaling	Scaling	Anti-Scaling	Scaling
ANAPC2	0.555886	0.144877	0.0971504	-0.367673	0.10239	0.512551	sp.Q9UJX6.ANC2_HUMAN	0.0849097	0.190202	0.750806	0.0410636	0.319527	0.149139	Buffering	Scaling	Buffering	Buffering
ANAPC5	0.303697	0.32479	0.42805	-0.316299	0.191341	0.641088	tr.F5H0F9.F5H0F9_HUMAN	0.11225	-0.313175	0.32504	0.340309	0.112917	-0.653484	Scaling	Scaling	Anti-Scaling	Anti-Scaling
ANAPC7	0.277652	0.401215	0.523105	-0.238675	0.202542	0.63989	sp.Q9UJX3.APC7_HUMAN	0.624986	-0.0705697	0.81704	-0.0443638	0.905436	-0.0262059	Scaling	Buffering	Buffering	Buffering
ANGEL1	0.00499488	1.14797	0.00802768	-1.33074	0.000154451	2.47871	sp.Q9UNK9.ANGE1_HUMAN	0.401139	0.529904	0.182898	-0.405084	0.191794	0.934988	Scaling	Scaling	Scaling	Scaling
ANK1	0.315088	0.697564	0.81819	0.127866	0.48867	0.569697	sp.P16157.14.ANK1_HUMAN	0.680069	0.214764	0.81452	-0.109086	0.621991	0.32385	Scaling	Anti-Scaling	Buffering	Buffering
ANKFY1	0.907667	0.0268746	0.00108963	-0.74893	0.0287126	0.775804	sp.Q9P2R3.ANFY1_HUMAN	0.547963	0.102441	0.00588884	-0.533154	0.0147177	0.635595	Buffering	Scaling	Buffering	Scaling
ANKK1	0.503042	-0.0394784	0.540598	-0.0527736	0.887831	0.0132952	sp.Q8NFD2.ANKK1_HUMAN	0.936202	0.06724	0.32534	-0.362013	0.622003	0.429253	Buffering	Buffering	Buffering	Scaling
ANKLE2	0.597581	0.221697	0.883799	0.0865657	0.843726	0.135132	sp.Q86XL3.ANKL2_HUMAN	0.979969	0.00853632	0.829992	-0.0882394	0.847583	0.0967757	Buffering	Buffering	Buffering	Buffering
ANKMY2	0.00305712	0.530801	0.254147	-0.635759	0.0755803	1.16656	sp.Q8IV38.ANKY2_HUMAN	0.264726	0.184239	0.417795	-0.298921	0.226879	0.483159	Scaling	Scaling	Buffering	Scaling
ANKRD10	0.310451	0.375041	0.138127	-0.568993	0.0659976	0.944034	sp.Q9NXR5.ANR10_HUMAN	0.677274	-0.189619	0.0481589	-0.830696	0.256481	0.641077	Scaling	Scaling	Anti-Scaling	Scaling
ANKRD11	0.120588	-0.479383	0.0634554	-0.479264	0.999723	-0.000118778	sp.Q6UB99.ANR11_HUMAN	0.164822	-0.108672	0.576421	-0.115046	0.974714	0.0063741	Anti-Scaling	Scaling	Anti-Scaling	Buffering
ANKRD12	0.25082	0.378983	0.0681218	-0.46957	0.0427462	0.848554	sp.Q6UB98.ANR12_HUMAN	0.238355	0.380498	0.131703	-0.460505	0.0508849	0.841002	Scaling	Scaling	Scaling	Scaling
ANKRD13A	0.309109	-0.45635	0.171632	0.958986	0.0741561	-1.41534	sp.Q8IZ07.AN13A_HUMAN	0.113286	-0.508537	0.371146	0.310064	0.0768921	-0.8186	Anti-Scaling	Anti-Scaling	Anti-Scaling	Anti-Scaling
ANKRD13D	0.392176	-0.223711	0.708955	0.079756	0.334034	-0.303467	sp.Q6ZTN6.3.AN13D_HUMAN	0.38361	0.40842	0.0714339	0.749985	0.539459	-0.341565	Anti-Scaling	Buffering	Scaling	Anti-Scaling
ANKRD16	0.455171	0.187318	4.24822e-05	-0.619727	0.017597	0.807044	sp.Q6P6B7.ANR16_HUMAN	0.691365	0.135042	0.0747606	-0.38086	0.191644	0.515902	Buffering	Scaling	Buffering	Scaling
ANKRD26	0.00960636	0.387469	0.0104593	-0.356709	0.000153787	0.744177	sp.Q9UPS8.3.ANR26_HUMAN	0.160431	0.635325	0.801519	-0.0414673	0.143776	0.676792	Scaling	Scaling	Scaling	Buffering
ANKRD27	0.642798	0.201541	0.693124	-0.0821034	0.541075	0.283645	sp.Q96NW4.ANR27_HUMAN	0.505797	0.341336	0.827667	0.138522	0.792802	0.202815	Buffering	Buffering	Scaling	Anti-Scaling
ANKRD30A	0.126553	-0.0231563	0.34156	0.197295	0.288853	-0.220451	sp.Q9BXX3.AN30A_HUMAN	0.388742	0.38269	0.0603257	0.381505	0.997739	0.00118539	Buffering	Anti-Scaling	Scaling	Anti-Scaling
ANKRD49	0.29145	0.251231	0.341231	-0.301221	0.146388	0.552452	sp.Q8WVL7.ANR49_HUMAN	0.936966	-0.0177581	0.0544541	-0.480297	0.119268	0.462539	Scaling	Scaling	Buffering	Scaling
ANLN	0.00904351	0.770492	0.0824928	-1.84837	0.0307113	2.61886	sp.Q9NQW6.ANLN_HUMAN	0.0114744	0.558329	0.513022	-0.531002	0.224978	1.08933	Scaling	Scaling	Scaling	Scaling
ANO1	0.399019	1.07228	0.605468	-0.342048	0.308261	1.41433	sp.Q5XXA6.ANO1_HUMAN	0.230909	1.29498	0.0505046	-0.948645	0.0652489	2.24363	Scaling	Scaling	Scaling	Scaling
ANO6	0.478222	0.310018	0.0454822	0.533718	0.613059	-0.223699	sp.Q4KMQ2.2.ANO6_HUMAN	0.930625	-0.0600831	0.576445	0.132141	0.785626	-0.192224	Scaling	Anti-Scaling	Buffering	Anti-Scaling
ANP32B	0.856443	-0.0194681	0.0392062	-0.571317	0.0431005	0.551849	sp.Q92688.AN32B_HUMAN	0.318145	-0.256656	0.451575	-0.198015	0.8596	-0.0586411	Buffering	Scaling	Anti-Scaling	Buffering
ANTXR1	0.301916	1.02584	0.842027	0.314021	0.684764	0.711821	sp.Q9H6X2.ANTR1_HUMAN	0.324136	1.14039	0.205263	0.897869	0.828776	0.242519	Scaling	Anti-Scaling	Scaling	Anti-Scaling
ANXA1	0.000471526	2.87498	0.0276834	1.92287	0.252356	0.952112	sp.P04083.ANXA1_HUMAN	0.0328534	0.950391	0.62829	0.414205	0.551737	0.536185	Scaling	Anti-Scaling	Scaling	Anti-Scaling
ANXA4	0.00775718	1.05693	0.509345	-0.470643	0.0842682	1.52758	sp.P09525.ANXA4_HUMAN	0.633728	0.202507	0.823346	-0.0671479	0.577857	0.269655	Scaling	Scaling	Buffering	Buffering
AP1G1	0.33256	-0.433861	0.0182265	-0.645971	0.653745	0.212111	sp.O43747.AP1G1_HUMAN	0.724814	-0.118284	0.264232	-0.249763	0.731735	0.131479	Anti-Scaling	Scaling	Anti-Scaling	Buffering
AP1G2	0.036759	1.30642	0.0312159	-1.22702	0.00226725	2.53344	sp.O75843.AP1G2_HUMAN	0.0775065	0.545005	0.0855312	-0.281751	0.018989	0.826756	Scaling	Scaling	Scaling	Scaling
AP1M1	0.125569	0.704792	0.401191	-0.546841	0.120943	1.25163	sp.Q9BXS5.AP1M1_HUMAN	0.354815	0.577689	0.988218	0.00257768	0.357493	0.575111	Scaling	Scaling	Scaling	Buffering
AP1M2	5.83671e-19	-3.50142	0.705019	0.999981	0.187176	-4.5014	sp.Q9Y6Q5.2.AP1M2_HUMAN	0.33317	-0.492597	0.812608	-0.127708	0.582201	-0.364889	Anti-Scaling	Anti-Scaling	Anti-Scaling	Buffering
AP2A1	0.989854	-0.00514658	0.946419	0.0528458	0.94596	-0.0579923	sp.O95782.AP2A1_HUMAN	0.157453	0.374271	0.718827	-0.233874	0.397735	0.608146	Buffering	Buffering	Scaling	Buffering
AP2S1	0.000366618	0.735902	0.71455	-0.163829	0.134836	0.899731	sp.P53680.AP2S1_HUMAN	0.0333392	0.495794	0.961674	0.0351769	0.554312	0.460617	Scaling	Buffering	Scaling	Buffering
AP3D1	0.116329	-0.280569	0.603128	-0.371397	0.895715	0.0908277	sp.O14617.5.AP3D1_HUMAN	0.918813	0.0527396	0.0110155	-0.220449	0.610106	0.273189	Anti-Scaling	Scaling	Buffering	Buffering
AP3M2	0.273866	0.307235	0.839933	-0.0529457	0.317903	0.360181	sp.P53677.AP3M2_HUMAN	0.855131	0.0451705	0.681449	-0.0661923	0.688155	0.111363	Scaling	Buffering	Buffering	Buffering
AP5B1	0.284576	-0.329424	0.123045	0.32339	0.0721621	-0.652813	sp.Q2VPB7.AP5B1_HUMAN	0.216741	0.191918	0.0582964	0.443266	0.274245	-0.251347	Anti-Scaling	Anti-Scaling	Buffering	Anti-Scaling
AP5M1	0.192853	0.663317	0.0872325	-0.407279	0.0636195	1.0706	sp.Q9H0R1.AP5M1_HUMAN	0.262573	0.378407	0.029843	-0.316392	0.0889924	0.694799	Scaling	Scaling	Scaling	Scaling
AP5S1	0.00649508	0.436014	0.108829	-0.375834	0.0040134	0.811848	sp.Q9NUS5.AP5S1_HUMAN	0.384655	0.158378	0.823896	-0.0368865	0.380219	0.195265	Scaling	Scaling	Buffering	Buffering
AP5Z1	0.00489084	0.425019	0.0229891	-0.447998	0.00047051	0.873017	sp.O43299.AP5Z1_HUMAN	0.949293	0.00853338	0.207433	-0.396095	0.204793	0.404628	Scaling	Scaling	Buffering	Scaling
APAF1	0.853342	0.0702547	0.122737	-0.308366	0.363623	0.37862	sp.O14727.APAF_HUMAN	0.38361	-0.249159	0.652128	-0.165362	0.837716	-0.0837975	Buffering	Scaling	Anti-Scaling	Buffering
APBA1	0.156616	-0.416115	0.812794	-0.141827	0.663408	-0.274288	sp.Q02410.APBA1_HUMAN	0.510617	0.22622	0.0691461	1.50536	0.104969	-1.27914	Anti-Scaling	Buffering	Buffering	Anti-Scaling
APBB1IP	0.789131	0.384739	0.00125317	-1.33313	0.266037	1.71787	sp.Q7Z5R6.AB1IP_HUMAN	0.679955	0.418789	0.139367	-0.50951	0.376951	0.928299	Scaling	Scaling	Scaling	Scaling
APEX1	0.137418	0.30459	0.00418484	-0.784614	0.00125068	1.0892	sp.P27695.APEX1_HUMAN	0.152644	0.29591	0.0455996	-1.02571	0.0173452	1.32162	Scaling	Scaling	Scaling	Scaling
APLP2	0.796006	0.145762	0.947544	-0.0215887	0.784959	0.16735	sp.Q06481.APLP2_HUMAN	0.506621	0.355408	0.333272	-0.368492	0.253035	0.7239	Buffering	Buffering	Scaling	Scaling
APMAP	0.0529684	0.442943	0.858766	-0.0534489	0.153161	0.496392	sp.Q9HDC9.APMAP_HUMAN	0.000117297	0.743692	0.933514	0.0202177	0.0112552	0.723474	Scaling	Buffering	Scaling	Buffering
APOB	0.391009	2.56214	0.517906	-0.00589181	0.39006	2.56803	sp.P04114.APOB_HUMAN	0.146137	1.41526	0.411098	0.741923	0.550036	0.673337	Scaling	Buffering	Scaling	Anti-Scaling
APOE	0.31069	-0.753929	0.371422	3.43155	0.29639	-4.18548	sp.P02649.APOE_HUMAN	0.928135	-0.0501182	0.0990843	1.46108	0.0880596	-1.5112	Anti-Scaling	Anti-Scaling	Buffering	Anti-Scaling
APPL2	0.0467158	0.428703	0.191184	-0.67548	0.0734507	1.10418	sp.Q8NEU8.DP13B_HUMAN	0.101931	0.380066	0.823311	-0.163293	0.48729	0.54336	Scaling	Scaling	Scaling	Buffering
APRT	0.895716	0.0204864	0.297984	-0.30006	0.306235	0.320546	sp.P07741.APT_HUMAN	0.443326	-0.205708	0.759018	-0.0798777	0.713219	-0.125831	Buffering	Scaling	Anti-Scaling	Buffering
APTX	0.0515227	0.391181	0.0461981	-0.346179	0.00322291	0.73736	sp.Q7Z2E3.APTX_HUMAN	0.138452	0.419041	0.226932	-0.190263	0.0526656	0.609304	Scaling	Scaling	Scaling	Buffering
AQP3	0.415326	1.96903	0.930169	-0.0552806	0.409121	2.02431	sp.Q92482.AQP3_HUMAN	0.254833	1.94356	0.253643	0.600987	0.394906	1.34257	Scaling	Buffering	Scaling	Anti-Scaling
ARAP1	0.0120918	0.608192	0.321995	0.337415	0.460792	0.270776	sp.Q96P48.ARAP1_HUMAN	0.358555	0.171345	0.571531	0.202226	0.935175	-0.0308811	Scaling	Anti-Scaling	Buffering	Anti-Scaling
ARCN1	0.000969922	0.431472	0.0290537	-0.466564	0.000768757	0.898036	sp.P48444.COPD_HUMAN	0.00546955	0.352248	0.818298	0.0269973	0.0334482	0.32525	Scaling	Scaling	Scaling	Buffering
ARF3	0.414722	-0.103531	0.839481	-0.10724	0.994431	0.00370918	sp.P61204.ARF3_HUMAN	0.864312	-0.0279133	0.507623	0.178938	0.483711	-0.206852	Anti-Scaling	Buffering	Buffering	Anti-Scaling
ARF6	0.0680486	0.726728	0.0441008	-0.446377	0.0117356	1.17311	sp.P62330.ARF6_HUMAN	0.147564	0.613146	0.522923	0.145351	0.280734	0.467795	Scaling	Scaling	Scaling	Anti-Scaling
ARG2	0.431216	0.615848	0.50989	-0.252736	0.301518	0.868584	sp.P78540.ARGI2_HUMAN	0.0633405	-1.33823	0.00209163	-1.72172	0.570705	0.383495	Scaling	Scaling	Anti-Scaling	Scaling
ARGLU1	0.00141794	1.02249	0.00195233	-0.809994	1.02098e-05	1.83248	sp.Q9NWB6.ARGL1_HUMAN	0.052864	0.603471	0.0320756	-0.342255	0.00819804	0.945726	Scaling	Scaling	Scaling	Scaling
ARHGAP12	0.436217	0.151851	0.446996	-0.189768	0.219362	0.34162	sp.Q8IWW6.RHG12_HUMAN	0.551966	0.22932	0.368087	-0.170729	0.33314	0.40005	Buffering	Buffering	Buffering	Buffering
ARHGAP17	0.188825	0.924867	0.0561558	-0.650094	0.0545394	1.57496	sp.Q68EM7.5.RHG17_HUMAN	0.703678	0.345901	0.0313338	-0.334104	0.479107	0.680005	Scaling	Scaling	Scaling	Scaling
ARHGAP18	0.161214	1.63624	0.400745	-0.560887	0.0769017	2.19712	sp.Q8N392.RHG18_HUMAN	0.0403969	1.83675	0.810618	0.117401	0.0288087	1.71935	Scaling	Scaling	Scaling	Anti-Scaling
ARHGAP21	0.127444	0.592414	0.225407	-0.459062	0.0365732	1.05148	sp.Q5T5U3.RHG21_HUMAN	0.306241	0.304729	0.121489	-0.224479	0.10996	0.529208	Scaling	Scaling	Scaling	Buffering
ARHGAP25	0.0814604	-0.921764	0.936026	-0.060283	0.315717	-0.861481	sp.P42331.4.RHG25_HUMAN	9.55465e-05	-1.10494	0.777797	-0.370102	0.579185	-0.734836	Anti-Scaling	Buffering	Anti-Scaling	Scaling
ARHGAP32	0.569727	-0.444976	0.459896	-0.333283	0.895887	-0.111693	sp.A7KAX9.RHG32_HUMAN	0.732324	-0.182448	0.310339	-0.377367	0.750228	0.194919	Anti-Scaling	Scaling	Anti-Scaling	Scaling
ARHGAP35	0.247198	0.555303	0.515192	0.289333	0.649705	0.26597	sp.Q9NRY4.RHG35_HUMAN	0.751367	0.0603021	0.105248	0.823168	0.106047	-0.762866	Scaling	Anti-Scaling	Buffering	Anti-Scaling
ARHGAP42	0.95203	-0.0370441	0.776349	0.0993924	0.838969	-0.136437	sp.A6NI28.RHG42_HUMAN	0.531484	0.225951	0.327722	0.22591	0.99991	4.02754e-05	Buffering	Buffering	Buffering	Anti-Scaling
ARHGAP5	5.29405e-05	1.2687	0.731081	-0.146739	0.00921019	1.41544	sp.Q13017.RHG05_HUMAN	0.258227	0.398027	0.291057	-0.16431	0.13353	0.562338	Scaling	Buffering	Scaling	Buffering
ARHGDIB	0.745613	0.374434	0.863927	0.387127	0.99582	-0.0126925	sp.P52566.GDIR2_HUMAN	0.354607	0.757196	0.827367	0.397293	0.851405	0.359903	Scaling	Anti-Scaling	Scaling	Anti-Scaling
ARHGEF1	0.713794	-0.148202	0.69965	-0.297401	0.856245	0.149199	tr.M0QZR4.M0QZR4_HUMAN	0.470517	0.285517	0.750958	0.137191	0.784957	0.148325	Anti-Scaling	Scaling	Scaling	Anti-Scaling
ARHGEF10	0.247309	-0.660874	0.43081	-0.396323	0.704454	-0.264551	sp.O15013.ARHGA_HUMAN	0.346036	-0.519987	0.756419	0.0922109	0.297684	-0.612198	Anti-Scaling	Scaling	Anti-Scaling	Buffering
ARHGEF12	0.565625	0.213888	0.377479	-0.23618	0.290213	0.450067	sp.Q9NZN5.ARHGC_HUMAN	0.256787	0.424577	0.841175	0.0381761	0.322371	0.386401	Buffering	Buffering	Scaling	Buffering
ARHGEF17	0.224979	-1.20037	0.496553	0.41822	0.150213	-1.61859	sp.Q96PE2.ARHGH_HUMAN	0.86609	-0.139099	0.852992	0.0973459	0.80411	-0.236445	Anti-Scaling	Anti-Scaling	Anti-Scaling	Buffering
ARHGEF18	0.0120643	0.769486	0.845788	-0.180926	0.365145	0.950412	sp.Q6ZSZ5.ARHGI_HUMAN	0.00753621	1.67485	0.249934	-0.664695	0.0160528	2.33954	Scaling	Buffering	Scaling	Scaling
ARHGEF39	0.417434	-0.452314	0.00655915	-0.649522	0.721394	0.197208	sp.Q8N4T4.ARG39_HUMAN	0.237159	0.720919	0.264551	0.663682	0.927677	0.0572374	Anti-Scaling	Scaling	Scaling	Anti-Scaling
ARHGEF40	0.00775862	-1.63421	0.234336	0.498623	0.00221057	-2.13283	sp.Q8TER5.ARH40_HUMAN	0.0529455	-0.409224	0.334598	0.193958	0.0252482	-0.603182	Anti-Scaling	Anti-Scaling	Anti-Scaling	Anti-Scaling
ARHGEF7	0.108031	0.476673	0.00289993	-0.585495	0.00399471	1.06217	sp.Q14155.5.ARHG7_HUMAN	0.421659	0.223673	0.00551991	-0.558026	0.0243853	0.781699	Scaling	Scaling	Buffering	Scaling
ARID1B	0.410498	0.414924	0.138662	-0.45627	0.146264	0.871194	sp.Q8NFD5.3.ARI1B_HUMAN	0.0209273	0.278915	0.214654	-0.489085	0.0682782	0.768	Scaling	Scaling	Scaling	Scaling
ARID2	0.237523	0.558377	0.794143	0.162519	0.584292	0.395858	sp.Q68CP9.ARID2_HUMAN	0.308694	0.47232	0.907065	0.0707283	0.574848	0.401592	Scaling	Anti-Scaling	Scaling	Buffering
ARID3A	0.280987	1.29466	0.68918	-0.298938	0.22599	1.5936	sp.Q99856.ARI3A_HUMAN	0.203273	1.85338	0.844574	-0.154046	0.182601	2.00743	Scaling	Scaling	Scaling	Buffering
ARID4A	0.0803634	0.908199	0.0107126	-0.604321	0.0139359	1.51252	sp.P29374.ARI4A_HUMAN	0.248216	0.324732	0.0048651	-0.775186	0.0060982	1.09992	Scaling	Scaling	Scaling	Scaling
ARL1	0.0535612	0.905593	0.597148	0.809569	0.948606	0.0960244	sp.P40616.ARL1_HUMAN	0.0624468	0.24247	0.556785	0.37418	0.829308	-0.13171	Scaling	Anti-Scaling	Buffering	Anti-Scaling
ARL2	0.4688	-0.248042	0.71669	-0.107414	0.740984	-0.140628	sp.P36404.ARL2_HUMAN	0.298687	-0.130009	0.382598	-0.112981	0.904934	-0.0170279	Anti-Scaling	Buffering	Anti-Scaling	Buffering
ARL2BP	0.720639	-0.0931768	0.0848826	-0.757477	0.159314	0.6643	sp.Q9Y2Y0.AR2BP_HUMAN	0.945845	0.0110808	0.0881505	-0.595749	0.0851511	0.60683	Buffering	Scaling	Buffering	Scaling
ARL5B	0.068664	0.471739	0.00113306	-0.700199	0.000863505	1.17194	sp.Q96KC2.ARL5B_HUMAN	0.0798467	0.402775	0.00743961	-0.47369	0.0032375	0.876465	Scaling	Scaling	Scaling	Scaling
ARL6IP1	0.228236	-0.167555	0.0155378	-0.981562	0.0360858	0.814007	sp.Q15041.AR6P1_HUMAN	0.40307	0.161707	0.832004	0.0340386	0.557057	0.127668	Anti-Scaling	Scaling	Buffering	Buffering
ARL6IP4	0.200661	0.331892	0.232826	-0.126741	0.105891	0.458633	sp.Q66PJ3.AR6P4_HUMAN	0.795214	-0.0814212	0.869738	0.0643314	0.757845	-0.145753	Scaling	Buffering	Buffering	Buffering
ARMC6	0.256523	0.468477	0.485024	-0.358563	0.192533	0.827041	sp.Q6NXE6.ARMC6_HUMAN	0.195116	0.637567	0.826641	-0.151589	0.334794	0.789156	Scaling	Scaling	Scaling	Buffering
ARPC3	0.208587	0.206002	0.454355	-0.207066	0.199609	0.413068	sp.O15145.ARPC3_HUMAN	0.292796	-0.276806	0.430197	0.332701	0.212141	-0.609507	Buffering	Buffering	Anti-Scaling	Anti-Scaling
ARPC5L	0.226458	0.301255	0.00589017	-0.456169	0.0155585	0.757425	sp.Q9BPX5.ARP5L_HUMAN	0.0060989	0.415951	0.392516	-0.113612	0.0061285	0.529564	Scaling	Scaling	Scaling	Buffering
ARRB1	0.103712	-1.61443	0.527796	-0.465976	0.302917	-1.14846	sp.P49407.ARRB1_HUMAN	0.0104449	-1.18018	0.315142	-0.507482	0.248296	-0.672701	Anti-Scaling	Scaling	Anti-Scaling	Scaling
ARRB2	0.91175	0.0149129	0.49466	0.161247	0.508617	-0.146334	sp.P32121.3.ARRB2_HUMAN	0.811422	0.14482	0.417148	0.241951	0.880542	-0.0971316	Buffering	Anti-Scaling	Buffering	Anti-Scaling
ARRDC1	0.0024182	1.21775	0.798586	-0.118256	0.0312045	1.336	sp.Q8N5I2.ARRD1_HUMAN	0.029592	0.364146	0.939444	-0.0424664	0.484798	0.406612	Scaling	Buffering	Scaling	Buffering
ASAH1	0.457174	0.296763	0.991015	-0.00376797	0.539811	0.300531	sp.Q13510.2.ASAH1_HUMAN	0.844841	-0.0477414	0.0897081	-0.441394	0.210717	0.393652	Scaling	Buffering	Buffering	Scaling
ASAP2	0.748948	-0.315648	0.437738	-0.804017	0.711857	0.488369	sp.O43150.ASAP2_HUMAN	0.97313	-0.0253869	0.734164	0.122636	0.853919	-0.148023	Anti-Scaling	Scaling	Buffering	Anti-Scaling
ASCC3	0.0622557	-0.361731	0.023106	-0.682219	0.252007	0.320488	sp.Q8N3C0.ASCC3_HUMAN	0.705657	0.198245	0.368842	-0.209777	0.476018	0.408022	Anti-Scaling	Scaling	Buffering	Buffering
ASF1A	0.269804	0.465539	0.165543	-0.341746	0.0979048	0.807285	sp.Q9Y294.ASF1A_HUMAN	0.0368184	0.790169	0.594954	-0.145363	0.0180135	0.935532	Scaling	Scaling	Scaling	Buffering
ASH2L	0.00479962	0.626916	0.540418	-0.181762	0.0237536	0.808677	sp.Q9UBL3.ASH2L_HUMAN	0.11636	0.234281	0.599785	-0.0641401	0.0919478	0.298421	Scaling	Buffering	Buffering	Buffering
ASNA1	0.560432	-0.262627	0.256513	-0.452615	0.711816	0.189988	sp.O43681.ASNA_HUMAN	0.694871	0.155027	0.597498	-0.345035	0.492635	0.500062	Anti-Scaling	Scaling	Buffering	Scaling
ASRGL1	0.309251	-0.92925	0.180823	-0.786113	0.883446	-0.143136	sp.Q7L266.ASGL1_HUMAN	0.161042	-0.807684	0.323832	-0.738578	0.934725	-0.0691063	Anti-Scaling	Scaling	Anti-Scaling	Scaling
ASS1	0.142764	2.31077	0.502758	-0.957263	0.108675	3.26803	sp.P00966.ASSY_HUMAN	0.510767	0.62116	0.042296	-1.14922	0.106299	1.77038	Scaling	Scaling	Scaling	Scaling
ASXL2	0.0810218	0.427505	0.181773	-0.276003	0.0235006	0.703508	sp.Q76L83.ASXL2_HUMAN	0.953655	0.0163357	0.0897275	-0.443251	0.198742	0.459587	Scaling	Scaling	Buffering	Scaling
ATAD2B	0.274269	0.297243	0.0187665	-0.851325	0.00863961	1.14857	sp.Q9ULI0.2.ATD2B_HUMAN	0.013162	0.857059	0.373828	-0.466907	0.0514412	1.32397	Scaling	Scaling	Scaling	Scaling
ATF7	0.253333	0.515423	0.902919	-0.014535	0.245146	0.529958	sp.P17544.6.ATF7_HUMAN	0.298897	0.608863	0.815139	0.0673836	0.371237	0.54148	Scaling	Buffering	Scaling	Buffering
ATF7IP	0.539726	0.155694	0.830766	-0.0865434	0.59728	0.242237	sp.Q6VMQ6.MCAF1_HUMAN	0.379217	0.189903	0.860298	0.14199	0.953179	0.0479131	Buffering	Buffering	Buffering	Anti-Scaling
ATG101	0.0841819	0.364401	0.651862	-0.205338	0.277866	0.569739	sp.Q9BSB4.ATGA1_HUMAN	0.168883	-0.118913	0.289093	-0.334388	0.459054	0.215475	Scaling	Buffering	Anti-Scaling	Scaling
ATG14	0.0330369	0.659835	0.143496	-0.420094	0.00775444	1.07993	sp.Q6ZNE5.BAKOR_HUMAN	0.206361	0.320886	0.931413	0.00997326	0.21328	0.310913	Scaling	Scaling	Scaling	Buffering
ATG2A	0.339671	0.180039	0.331285	0.1545	0.908876	0.025539	sp.Q2TAZ0.3.ATG2A_HUMAN	0.324189	0.0935161	0.458691	0.0962831	0.982074	-0.00276701	Buffering	Anti-Scaling	Buffering	Buffering
ATG2B	0.0681036	0.909614	0.0924525	-0.70363	0.0107205	1.61324	sp.Q96BY7.ATG2B_HUMAN	0.322589	0.184918	0.13225	-0.474994	0.0636756	0.659912	Scaling	Scaling	Buffering	Scaling
ATG5	0.999888	-8.38916e-05	0.0404514	-0.584069	0.389379	0.583985	sp.Q9H1Y0.ATG5_HUMAN	0.886456	0.057999	0.889459	-0.0299545	0.841684	0.0879534	Buffering	Scaling	Buffering	Buffering
ATL1	0.530318	-0.307698	0.872216	0.0696139	0.539725	-0.377312	sp.Q8WXF7.ATLA1_HUMAN	0.556172	-0.251439	0.243148	0.845434	0.175521	-1.09687	Anti-Scaling	Buffering	Anti-Scaling	Anti-Scaling
ATL2	0.047819	0.368687	0.00630269	-0.976854	0.000878208	1.34554	sp.Q8NHH9.ATLA2_HUMAN	0.127077	0.412782	0.129066	-0.226004	0.0405606	0.638786	Scaling	Scaling	Scaling	Buffering
ATL3	0.128274	-1.21943	0.413622	0.208596	0.0879886	-1.42803	sp.Q6DD88.ATLA3_HUMAN	0.494222	-0.471371	0.547988	0.213324	0.367587	-0.684695	Anti-Scaling	Anti-Scaling	Anti-Scaling	Anti-Scaling
ATM	0.0714733	0.483495	0.291297	-0.452911	0.0587633	0.936407	sp.Q13315.ATM_HUMAN	0.224123	0.239716	0.165416	-0.327457	0.042644	0.567173	Scaling	Scaling	Buffering	Scaling
ATN1	0.477796	-0.313986	0.111776	-0.52238	0.663238	0.208393	sp.P54259.ATN1_HUMAN	0.728122	0.12133	0.0809634	-0.311992	0.239877	0.433322	Anti-Scaling	Scaling	Buffering	Scaling
ATP11A	0.062141	0.662107	0.194694	-0.449727	0.014272	1.11183	tr.E9PEJ6.E9PEJ6_HUMAN	0.297838	0.659793	0.694566	-0.115752	0.250047	0.775545	Scaling	Scaling	Scaling	Buffering
ATP12A	0.000524098	-0.0757353	0.117462	-0.0463094	0.176906	-0.029426	sp.P54707.2.AT12A_HUMAN	0.687312	-0.0946125	0.938734	0.0176265	0.704605	-0.112239	Buffering	Buffering	Buffering	Buffering
ATP13A1	0.421209	0.468003	0.445093	-0.505234	0.243396	0.973237	sp.Q9HD20.AT131_HUMAN	0.94468	-0.0540874	0.521758	-0.42642	0.695658	0.372333	Scaling	Scaling	Buffering	Scaling
ATP1A3	2.91916e-05	-1.50305	0.906965	0.146143	0.269583	-1.64919	sp.P13637.3.AT1A3_HUMAN	0.893518	0.0228068	0.0807536	-0.372793	0.0909571	0.3956	Anti-Scaling	Anti-Scaling	Buffering	Scaling
ATP2A2	0.0400809	0.776971	0.639133	-0.20257	0.0961676	0.979541	sp.P16615.AT2A2_HUMAN	0.0821589	0.629669	0.731666	0.104629	0.20992	0.52504	Scaling	Buffering	Scaling	Anti-Scaling
ATP2A3	0.0923029	-1.33096	0.0225953	2.05587	0.00349877	-3.38683	sp.Q93084.2.AT2A3_HUMAN	0.31476	-0.798604	0.0516519	1.54372	0.0341513	-2.34233	Anti-Scaling	Anti-Scaling	Anti-Scaling	Anti-Scaling
ATP2B1	0.0664874	0.696996	0.377077	0.516111	0.752108	0.180886	sp.P20020.AT2B1_HUMAN	0.0186256	0.756829	0.28029	0.33914	0.232695	0.417689	Scaling	Anti-Scaling	Scaling	Anti-Scaling
ATP5S	0.258238	0.519696	0.00961782	-0.885962	0.0187931	1.40566	sp.Q99766.ATP5S_HUMAN	0.0808633	0.846227	0.00539061	-0.581074	0.0138194	1.4273	Scaling	Scaling	Scaling	Scaling
ATP6V0A2	0.732728	0.137528	0.951709	-0.0386391	0.806658	0.176168	sp.Q9Y487.VPP2_HUMAN	0.0639207	0.501523	0.0245553	0.255234	0.279278	0.246289	Buffering	Buffering	Scaling	Anti-Scaling
ATP6V0C	0.517685	0.185716	0.0695128	-0.637002	0.0621364	0.822717	sp.P27449.VATL_HUMAN	0.4754	0.292536	0.33561	-0.237447	0.257735	0.529983	Buffering	Scaling	Scaling	Buffering
ATP6V0D1	0.694642	0.151612	0.0181658	-0.731061	0.0711386	0.882673	sp.P61421.VA0D1_HUMAN	0.200506	-0.23441	0.881846	0.0364304	0.334049	-0.270841	Buffering	Scaling	Anti-Scaling	Buffering
ATP6V1B1	0.581297	0.322166	0.452745	-0.402591	0.334722	0.724757	sp.P15313.VATB1_HUMAN	0.114454	-0.495766	0.659902	-0.105671	0.257134	-0.390095	Scaling	Scaling	Anti-Scaling	Buffering
ATP6V1B2	0.00281274	0.92377	0.137351	-0.416416	0.000862032	1.34019	sp.P21281.VATB2_HUMAN	0.570149	0.103593	0.429367	-0.131292	0.31037	0.234885	Scaling	Scaling	Buffering	Buffering
ATP6V1D	0.458162	0.342669	0.0429508	0.532918	0.694902	-0.190248	sp.Q9Y5K8.VATD_HUMAN	0.755607	0.0871098	0.225149	0.417434	0.423265	-0.330324	Scaling	Anti-Scaling	Buffering	Anti-Scaling
ATP6V1G1	0.0080332	0.285636	0.701419	0.0880227	0.413512	0.197613	sp.O75348.VATG1_HUMAN	0.326096	-0.258112	0.92559	-0.0581764	0.761054	-0.199936	Scaling	Buffering	Anti-Scaling	Buffering
ATP7B	0.179342	-0.882998	0.95947	-0.0178461	0.218237	-0.865152	sp.P35670.ATP7B_HUMAN	0.779073	-0.143812	0.0998954	-0.633015	0.408979	0.489202	Anti-Scaling	Buffering	Anti-Scaling	Scaling
ATPAF2	0.230334	0.791574	0.00496435	-0.522082	0.0954548	1.31366	sp.Q8N5M1.ATPF2_HUMAN	0.660542	0.238919	0.00986239	-0.515159	0.241242	0.754079	Scaling	Scaling	Buffering	Scaling
ATRAID	0.149937	0.182888	0.525375	0.119673	0.750324	0.0632142	sp.Q6UW56.3.ARAID_HUMAN	0.150375	0.551564	0.516417	0.348381	0.727573	0.203183	Buffering	Anti-Scaling	Scaling	Anti-Scaling
ATRN	0.299891	0.314416	0.54414	-0.141796	0.196919	0.456212	sp.O75882.ATRN_HUMAN	0.0148532	0.488745	0.968878	0.00903319	0.0828857	0.479711	Scaling	Buffering	Scaling	Buffering
ATXN1L	0.859007	-0.0639114	0.0131587	-0.675714	0.159052	0.611803	sp.P0C7T5.ATX1L_HUMAN	0.919579	0.0229412	0.284845	-0.208101	0.402754	0.231042	Buffering	Scaling	Buffering	Buffering
ATXN2	0.218943	0.408013	0.997078	0.000962813	0.296853	0.40705	sp.Q99700.ATX2_HUMAN	0.488927	0.125099	0.00403173	-0.513731	0.017946	0.638831	Scaling	Buffering	Buffering	Scaling
ATXN2L	0.905038	0.0380109	0.627525	-0.20546	0.630716	0.243471	sp.Q8WWM7.ATX2L_HUMAN	0.288722	0.0789283	0.921487	-0.0277445	0.698725	0.106673	Buffering	Buffering	Buffering	Buffering
ATXN3	0.00582943	1.08895	0.013127	-0.864469	0.000155062	1.95342	sp.P54252.2.ATX3_HUMAN	0.105476	0.691901	0.0797934	-0.648584	0.0153639	1.34049	Scaling	Scaling	Scaling	Scaling
ATXN7L3B	0.0727441	0.717832	2.07517e-08	-0.448971	0.0220233	1.1668	sp.Q96GX2.A7L3B_HUMAN	0.402834	-0.263077	0.00973465	-0.389956	0.657346	0.126879	Scaling	Scaling	Anti-Scaling	Scaling
AUH	0.0104001	0.6643	0.257517	-0.349837	0.0139942	1.01414	sp.Q13825.AUHM_HUMAN	0.138999	0.615425	0.535172	-0.179154	0.0973173	0.794579	Scaling	Scaling	Scaling	Buffering
AUP1	0.0090829	0.161541	0.271284	-0.39567	0.153626	0.557212	sp.Q9Y679.AUP1_HUMAN	0.636092	0.189585	0.494623	-0.32475	0.386251	0.514335	Buffering	Scaling	Buffering	Scaling
AURKB	0.264325	-0.94661	0.00844577	-0.727894	0.764124	-0.218715	sp.Q96GD4.AURKB_HUMAN	0.670751	0.182897	0.524262	0.153663	0.948737	0.0292342	Anti-Scaling	Scaling	Buffering	Anti-Scaling
AVL9	0.00118002	0.469857	0.0129285	-1.00542	0.00151203	1.47527	sp.Q8NBF6.AVL9_HUMAN	0.03299	0.316458	0.000622064	-0.573407	1.21018e-05	0.889865	Scaling	Scaling	Scaling	Scaling
AXIN1	0.280275	0.251978	0.126408	-0.600665	0.0541047	0.852643	sp.O15169.AXIN1_HUMAN	0.571988	0.170813	0.330925	-0.159392	0.322112	0.330205	Scaling	Scaling	Buffering	Buffering
AXL	0.894262	0.155678	1.89857e-09	-2.64673	0.0484444	2.80241	sp.P30530.UFO_HUMAN	0.957017	-0.0334008	0.0191548	-0.870624	0.215395	0.837224	Buffering	Scaling	Buffering	Scaling
B3GAT3	0.270827	0.260305	0.152634	0.324773	0.8223	-0.0644682	sp.O94766.B3GA3_HUMAN	0.946624	0.0107472	0.748633	0.0668531	0.810419	-0.056106	Scaling	Anti-Scaling	Buffering	Buffering
B3GNT2	0.632561	0.199122	0.130964	-1.12688	0.098428	1.326	sp.Q9NY97.B3GN2_HUMAN	0.813361	0.11476	0.525656	-0.169786	0.593069	0.284546	Buffering	Scaling	Buffering	Buffering
B3GNT3	6.542e-10	-1.50683	0.523145	1.45272	0.25792	-2.95956	sp.Q9Y2A9.B3GN3_HUMAN	0.347349	-1.21306	0.581019	-0.339478	0.484655	-0.873578	Anti-Scaling	Anti-Scaling	Anti-Scaling	Scaling
B4GALT1	0.0703877	1.57824	0.618541	-0.147402	0.0506773	1.72564	sp.P15291.B4GT1_HUMAN	1.8073e-06	0.840583	0.377511	-0.177896	1.51162e-05	1.01848	Scaling	Buffering	Scaling	Buffering
BABAM1	0.00389432	0.233089	0.428892	-0.458247	0.275348	0.691337	sp.Q9NWV8.BABA1_HUMAN	0.299227	0.599708	0.588543	-0.229272	0.216174	0.82898	Buffering	Scaling	Scaling	Buffering
BACE1	0.94964	-0.0475086	0.515216	0.353333	0.652519	-0.400842	sp.P56817.BACE1_HUMAN	0.959619	0.0327139	0.177944	-0.391028	0.522417	0.423742	Buffering	Anti-Scaling	Buffering	Scaling
BAD	0.725627	-0.117694	0.66722	0.0915151	0.578191	-0.209209	sp.Q92934.BAD_HUMAN	0.44061	0.37119	0.791392	-0.056494	0.400913	0.427684	Anti-Scaling	Buffering	Scaling	Buffering
BAG1	0.924173	0.0378692	0.0036045	-0.709158	0.12863	0.747027	sp.Q99933.BAG1_HUMAN	0.766965	0.193111	0.0638002	-0.546245	0.310364	0.739356	Buffering	Scaling	Buffering	Scaling
BAG4	0.171914	0.296177	0.774999	-0.0784274	0.262255	0.374604	sp.O95429.BAG4_HUMAN	0.0489382	0.523077	0.314921	-0.275967	0.0285793	0.799043	Scaling	Buffering	Scaling	Scaling
BAG5	0.021316	0.608006	0.0960406	-0.506012	0.00492468	1.11402	sp.Q9UL15.2.BAG5_HUMAN	0.0380577	0.438519	0.0292684	-0.31469	0.00353942	0.753209	Scaling	Scaling	Scaling	Scaling
BANF1	0.0418406	0.337329	0.230458	0.266031	0.767101	0.0712972	sp.O75531.BAF_HUMAN	0.105203	0.444592	0.628608	0.0781314	0.196939	0.36646	Scaling	Anti-Scaling	Scaling	Buffering
BANP	0.210397	-0.215704	0.139194	-0.248811	0.875611	0.033107	sp.Q8N9N5.BANP_HUMAN	0.765987	-0.0406282	0.200191	-0.241324	0.339005	0.200696	Anti-Scaling	Buffering	Buffering	Buffering
BAX	0.978204	-0.0117444	0.816666	0.170245	0.823227	-0.181989	sp.Q07812.2.BAX_HUMAN	0.505946	0.440091	0.892554	0.126875	0.774961	0.313215	Buffering	Anti-Scaling	Scaling	Anti-Scaling
BAZ1A	0.160582	0.669985	0.000557815	-0.987841	0.00926482	1.65783	sp.Q9NRL2.BAZ1A_HUMAN	0.738286	0.111193	0.00900599	-0.679689	0.0625856	0.790882	Scaling	Scaling	Buffering	Scaling
BAZ2A	0.616448	0.22382	0.867186	-0.0523999	0.592941	0.27622	sp.Q9UIF9.BAZ2A_HUMAN	0.628843	0.115772	0.940823	0.00922357	0.672745	0.106549	Buffering	Buffering	Buffering	Buffering
BBC3	0.781851	-0.153734	0.0624492	-0.786977	0.305674	0.633244	sp.Q9BXH1.BBC3_HUMAN	0.673396	0.227937	0.158737	0.634217	0.505421	-0.406279	Anti-Scaling	Scaling	Buffering	Anti-Scaling
BBS2	0.68252	0.0944779	3.21493e-05	-0.968623	0.00190425	1.0631	sp.Q9BXC9.BBS2_HUMAN	0.975109	-0.00544902	0.322824	-0.258129	0.316737	0.25268	Buffering	Scaling	Buffering	Scaling
BCAM	0.314613	1.24905	0.52929	-1.12946	0.26494	2.37851	sp.P50895.BCAM_HUMAN	0.641704	0.40535	0.931838	0.0789454	0.785425	0.326404	Scaling	Scaling	Scaling	Buffering
BCAR1	0.00119526	1.13589	0.599115	-0.341766	0.0429256	1.47766	sp.P56945.6.BCAR1_HUMAN	0.18249	0.36075	0.612758	-0.18827	0.200494	0.549021	Scaling	Scaling	Scaling	Buffering
BCAT1	0.801304	-0.2136	0.718946	0.734282	0.65889	-0.947882	sp.P54687.5.BCAT1_HUMAN	0.621236	0.310339	0.483571	0.836852	0.670849	-0.526513	Anti-Scaling	Anti-Scaling	Scaling	Anti-Scaling
BCAT2	0.150806	0.616862	0.230826	-0.756681	0.0665314	1.37354	sp.O15382.BCAT2_HUMAN	0.000551188	0.895622	0.279267	-0.622234	0.0572571	1.51786	Scaling	Scaling	Scaling	Scaling
BCKDHA	0.90695	-0.0799031	0.606475	-0.280042	0.808201	0.200139	sp.P12694.ODBA_HUMAN	0.925003	0.023677	0.755834	0.0870924	0.855412	-0.0634155	Buffering	Scaling	Buffering	Buffering
BCKDHB	0.401718	0.229683	0.860542	0.0385638	0.53688	0.191119	sp.P21953.ODBB_HUMAN	0.590818	-0.277532	0.929174	-0.0197549	0.62947	-0.257777	Buffering	Buffering	Anti-Scaling	Buffering
BCKDK	0.352833	0.336701	0.304194	-0.324458	0.148547	0.661159	sp.O14874.BCKD_HUMAN	0.154492	0.27042	0.85448	0.0555989	0.50895	0.214821	Scaling	Scaling	Scaling	Buffering
BCL11B	0.826152	0.0362852	0.288582	-0.19635	0.253986	0.232635	sp.Q9C0K0.BC11B_HUMAN	0.882955	0.135021	0.468026	-0.842702	0.478413	0.977723	Buffering	Buffering	Buffering	Scaling
BCL2L12	0.0053192	0.895339	0.227762	-0.0965431	0.00466843	0.991882	sp.Q9HB09.B2L12_HUMAN	0.444677	0.35881	0.651308	0.19058	0.770666	0.16823	Scaling	Buffering	Scaling	Anti-Scaling
BCL2L2	0.0156797	0.662117	0.385019	-0.282746	0.0208955	0.944863	sp.Q92843.2.B2CL2_HUMAN	0.152192	0.358558	0.000746038	-0.914956	0.000979404	1.27351	Scaling	Scaling	Scaling	Scaling
BCL7A	0.189989	0.595864	0.964528	-0.026059	0.373412	0.621923	sp.Q4VC05.2.BCL7A_HUMAN	0.634528	0.173246	0.969043	-0.00941999	0.643339	0.182666	Scaling	Buffering	Buffering	Buffering
BCL7C	0.986792	0.00607168	0.350838	-0.265719	0.540137	0.271791	sp.Q8WUZ0.BCL7C_HUMAN	0.00846707	0.481882	0.068766	0.448794	0.885879	0.0330884	Buffering	Scaling	Scaling	Anti-Scaling
BCL9L	0.577709	0.481406	0.947697	-0.0376436	0.601529	0.51905	sp.Q86UU0.BCL9L_HUMAN	0.248135	0.570582	0.650259	-0.154775	0.2013	0.725357	Scaling	Buffering	Scaling	Buffering
BCLAF1	0.720026	0.207629	0.048915	-0.384203	0.359947	0.591831	sp.Q9NYF8.BCLF1_HUMAN	0.242135	0.22971	0.685221	-0.0497847	0.184871	0.279495	Buffering	Scaling	Buffering	Buffering
BEND3	0.613442	-0.103359	0.234389	-0.270386	0.538231	0.167027	sp.Q5T5X7.BEND3_HUMAN	0.687242	0.121231	0.0182681	-0.312315	0.226035	0.433546	Anti-Scaling	Scaling	Buffering	Scaling
BICD1	0.118718	0.300735	0.0173934	-0.543842	0.00202944	0.844578	sp.Q96G01.BICD1_HUMAN	0.926792	-0.0189578	0.19057	-0.408743	0.227012	0.389786	Scaling	Scaling	Buffering	Scaling
BICD2	0.212159	0.454452	0.397837	-0.329783	0.129089	0.784235	sp.Q8TD16.2.BICD2_HUMAN	0.25327	0.419983	0.665886	0.126425	0.497282	0.293558	Scaling	Scaling	Scaling	Anti-Scaling
BIN2	0.00349722	-0.615092	0.593536	1.19218	0.440297	-1.80727	sp.Q9UBW5.BIN2_HUMAN	0.122156	-0.803738	0.4757	0.74413	0.201807	-1.54787	Anti-Scaling	Anti-Scaling	Anti-Scaling	Anti-Scaling
BIN3	0.0102534	0.631515	0.619646	-0.124181	0.018835	0.755697	sp.Q9NQY0.BIN3_HUMAN	0.59294	0.163379	0.494655	-0.158106	0.372595	0.321484	Scaling	Buffering	Buffering	Buffering
BIRC2	0.882453	-0.0427823	0.892099	0.0323798	0.82627	-0.0751621	sp.Q13490.BIRC2_HUMAN	0.28815	0.192597	0.611178	-0.101371	0.242999	0.293968	Buffering	Buffering	Buffering	Buffering
BIRC6	0.194361	0.295382	0.0565413	-0.380385	0.0247796	0.675767	sp.Q9NR09.BIRC6_HUMAN	0.952874	0.0256915	0.851765	-0.0271709	0.905627	0.0528624	Scaling	Scaling	Buffering	Buffering
BLOC1S1	0.000562575	0.873704	0.350611	-0.345834	0.0383097	1.21954	sp.P78537.BL1S1_HUMAN	0.487924	0.16513	0.863163	-0.0609101	0.577619	0.22604	Scaling	Scaling	Buffering	Buffering
BLOC1S3	0.998709	0.000572365	0.0356347	-0.308046	0.406148	0.308618	sp.Q6QNY0.BL1S3_HUMAN	0.128664	-0.470857	0.896611	0.086277	0.450831	-0.557134	Buffering	Scaling	Anti-Scaling	Buffering
BLVRA	0.39642	0.385598	0.608419	-0.714026	0.450463	1.09962	sp.P53004.BIEA_HUMAN	0.564039	0.114086	0.9015	-0.102474	0.795637	0.21656	Scaling	Scaling	Buffering	Buffering
BLVRB	0.152006	1.02535	0.137905	-0.6195	0.0440535	1.64485	sp.P30043.BLVRB_HUMAN	0.518809	0.28381	0.283749	0.579462	0.621518	-0.295653	Scaling	Scaling	Scaling	Anti-Scaling
BMP1	0.963453	0.015528	0.315303	0.406833	0.415636	-0.391305	sp.P13497.BMP1_HUMAN	0.945529	-0.0430794	0.0619671	0.606995	0.327609	-0.650074	Buffering	Anti-Scaling	Buffering	Anti-Scaling
BNIP3L	0.147916	0.441337	0.477847	0.215837	0.557962	0.225499	sp.O60238.BNI3L_HUMAN	0.281079	-0.248833	0.618606	-0.112697	0.64287	-0.136135	Scaling	Anti-Scaling	Anti-Scaling	Buffering
BOLA2	0.936735	0.0106631	0.87431	0.0559425	0.900619	-0.0452794	sp.Q9H3K6.BOLA2_HUMAN	0.754075	0.0332488	0.165506	0.651202	0.179276	-0.617953	Buffering	Buffering	Buffering	Anti-Scaling
BOLA3	0.0321436	0.50505	0.513953	-0.242905	0.101856	0.747956	sp.Q53S33.BOLA3_HUMAN	0.593204	0.23053	0.925826	0.0301541	0.69212	0.200376	Scaling	Buffering	Buffering	Buffering
BRAP	0.264571	0.231239	0.551398	-0.192141	0.263184	0.42338	sp.Q7Z569.BRAP_HUMAN	0.741817	-0.0387891	0.00549009	-0.470177	0.0175221	0.431388	Buffering	Buffering	Buffering	Scaling
BRAT1	0.00213399	0.309369	5.7356e-06	-1.06085	1.84746e-06	1.37022	sp.Q6PJG6.BRAT1_HUMAN	0.131392	0.203678	0.469183	-0.119181	0.101859	0.322859	Scaling	Scaling	Buffering	Buffering
BRCA2	0.229371	0.285379	0.221544	-0.342835	0.0725939	0.628214	sp.P51587.BRCA2_HUMAN	0.244766	-0.383973	0.822685	-0.0404336	0.326903	-0.343539	Scaling	Scaling	Anti-Scaling	Buffering
BRD3	0.620717	-0.05839	0.398484	-0.204825	0.535947	0.146435	sp.Q15059.BRD3_HUMAN	0.346814	0.266711	0.947636	0.0209414	0.536995	0.245769	Buffering	Buffering	Scaling	Buffering
BRD4	0.756051	0.0666447	0.677961	-0.233845	0.608769	0.300489	sp.O60885.BRD4_HUMAN	0.402647	0.533558	0.277721	-0.406284	0.199065	0.939843	Buffering	Buffering	Scaling	Scaling
BRD7	0.0431786	0.669269	0.0205205	-0.520536	0.00327724	1.1898	sp.Q9NPI1.2.BRD7_HUMAN	0.302255	-0.521841	0.908718	0.0323665	0.315515	-0.554207	Scaling	Scaling	Anti-Scaling	Buffering
BRF1	0.194696	0.561982	0.0316784	-0.986534	0.0124655	1.54852	sp.Q92994.TF3B_HUMAN	0.70121	0.141405	0.0109889	-0.564769	0.109547	0.706174	Scaling	Scaling	Buffering	Scaling
BRI3BP	0.00940494	1.2468	0.000463864	-0.653056	0.00264001	1.89986	sp.Q8WY22.BRI3B_HUMAN	0.01002	0.71956	0.180717	-0.812322	0.0495897	1.53188	Scaling	Scaling	Scaling	Scaling
BRMS1	0.010085	0.442148	0.152177	0.326146	0.625532	0.116002	sp.Q9HCU9.BRMS1_HUMAN	0.637614	-0.0953537	0.736942	0.0667181	0.536424	-0.162072	Scaling	Anti-Scaling	Buffering	Buffering
BRMS1L	0.0537291	1.08094	0.122716	-0.471895	0.0137408	1.55284	sp.Q5PSV4.BRM1L_HUMAN	0.11058	0.601633	0.00409767	-0.621151	0.0117108	1.22278	Scaling	Scaling	Scaling	Scaling
BSG	0.307083	-0.584511	0.281676	-0.925912	0.682681	0.341401	sp.P35613.BASI_HUMAN	0.176114	-0.321522	0.616133	-0.546957	0.832243	0.225435	Anti-Scaling	Scaling	Anti-Scaling	Scaling
BSPRY	0.22836	1.01834	0.417282	-0.89307	0.15601	1.91141	sp.Q5W0U4.BSPRY_HUMAN	0.443912	0.708692	0.330798	-0.819755	0.202639	1.52845	Scaling	Scaling	Scaling	Scaling
BST2	7.00597e-09	2.30985	0.949873	-0.112948	0.263045	2.42279	sp.Q10589.BST2_HUMAN	0.37709	-0.474734	0.577399	-0.825936	0.810583	0.351201	Scaling	Buffering	Anti-Scaling	Scaling
BUD13	0.0406444	0.373283	0.0509172	-0.563779	0.00595153	0.937062	sp.Q9BRD0.BUD13_HUMAN	0.000852217	0.485531	0.0488155	-0.550818	0.00226928	1.03635	Scaling	Scaling	Scaling	Scaling
BZW2	0.00029354	0.546566	0.357705	-0.267647	0.0332954	0.814214	sp.Q9Y6E2.BZW2_HUMAN	0.614303	0.0897635	0.977875	0.0109312	0.847548	0.0788323	Scaling	Scaling	Buffering	Buffering
C11orf54	0.954865	0.0185883	0.0843855	-0.54283	0.190011	0.561419	sp.Q9H0W9.CK054_HUMAN	0.477734	0.4691	0.340464	-0.345367	0.268165	0.814467	Buffering	Scaling	Scaling	Scaling
C11orf68	0.897748	-0.0524637	0.242741	0.477928	0.334311	-0.530392	sp.Q9H3H3.2.CK068_HUMAN	0.632717	0.108467	0.103351	0.392163	0.340711	-0.283696	Buffering	Anti-Scaling	Buffering	Anti-Scaling
C12orf10	0.732609	0.102724	0.0829226	-0.470835	0.131883	0.573559	sp.Q9HB07.MYG1_HUMAN	0.873486	-0.0516519	0.0108416	-0.571276	0.175685	0.519624	Buffering	Scaling	Buffering	Scaling
C12orf29	0.0187779	0.759122	0.31785	-0.293858	0.0193137	1.05298	sp.Q8N999.CL029_HUMAN	0.537489	-0.392846	0.00965731	-0.619162	0.718163	0.226317	Scaling	Scaling	Anti-Scaling	Scaling
C12orf4	0.0731622	0.371776	0.0867497	-1.03482	0.0304897	1.40659	sp.Q9NQ89.CL004_HUMAN	0.0899374	-0.539995	0.336179	-0.197132	0.290645	-0.342862	Scaling	Scaling	Anti-Scaling	Buffering
C12orf43	0.537571	0.178768	0.0482638	-0.233287	0.205664	0.412055	sp.Q96C57.CL043_HUMAN	0.0727297	0.522667	0.285842	-0.312685	0.0406986	0.835351	Buffering	Buffering	Scaling	Scaling
C12orf45	0.219709	0.603257	0.3359	-0.566768	0.114355	1.17003	sp.Q8N5I9.CL045_HUMAN	0.863795	0.0365544	0.75797	-0.186858	0.72037	0.223412	Scaling	Scaling	Buffering	Buffering
C12orf57	0.805446	0.0811953	0.862926	0.118901	0.958776	-0.0377061	sp.Q99622.C10_HUMAN	0.83322	0.073842	0.4046	-0.366312	0.385787	0.440154	Buffering	Anti-Scaling	Buffering	Scaling
C12orf65	0.142117	0.415589	0.245656	-0.219841	0.055478	0.63543	sp.Q9H3J6.CL065_HUMAN	0.0979787	0.569784	0.426288	-0.264013	0.0726928	0.833796	Scaling	Buffering	Scaling	Scaling
C14orf119	0.0353846	0.545174	0.441028	-0.0865893	0.0193657	0.631763	sp.Q9NWQ9.CN119_HUMAN	0.994735	-0.00173478	0.0699566	-0.570389	0.13214	0.568655	Scaling	Buffering	Buffering	Scaling
C14orf93	0.218112	0.310262	0.0126043	-0.560516	0.0108371	0.870778	sp.Q9H972.CN093_HUMAN	0.17976	0.724865	0.672331	-0.205811	0.0611546	0.930676	Scaling	Scaling	Scaling	Buffering
C16orf58	0.389101	0.310644	0.88396	-0.0476707	0.422645	0.358315	sp.Q96GQ5.CP058_HUMAN	0.00117449	0.78832	0.127765	-0.195807	0.000298175	0.984127	Scaling	Buffering	Scaling	Buffering
C16orf70	0.376896	0.310423	0.00177635	-0.89895	0.0104968	1.20937	sp.Q9BSU1.CP070_HUMAN	0.440802	0.158591	0.82925	0.0336166	0.577711	0.124974	Scaling	Scaling	Buffering	Buffering
C19orf25	0.000277106	0.315584	0.169358	-0.816818	0.0995203	1.1324	sp.Q9UFG5.CS025_HUMAN	0.746315	-0.350307	0.876041	-0.0909619	0.824234	-0.259346	Scaling	Scaling	Anti-Scaling	Buffering
C19orf47	0.0611584	0.603093	0.176905	0.487898	0.753211	0.115195	sp.Q8N9M1.CS047_HUMAN	0.188832	0.281097	0.647752	-0.126224	0.235439	0.407321	Scaling	Anti-Scaling	Scaling	Buffering
C19orf53	0.804004	-0.0194114	0.0860899	-0.503698	0.0924174	0.484287	sp.Q9UNZ5.L10K_HUMAN	0.135885	0.952608	0.169836	-1.15615	0.0414052	2.10876	Buffering	Scaling	Scaling	Scaling
C19orf66	0.860848	-0.070119	0.757865	0.263885	0.710884	-0.334004	sp.Q9NUL5.CS066_HUMAN	0.280692	0.957895	0.385693	0.266858	0.408323	0.691037	Buffering	Anti-Scaling	Scaling	Anti-Scaling
C1D	0.16283	0.358742	0.196953	-0.510303	0.0627055	0.869046	sp.Q13901.C1D_HUMAN	0.2085	0.272701	0.22927	-0.178167	0.0719767	0.450869	Scaling	Scaling	Scaling	Buffering
C1GALT1	0.00915765	0.606671	0.0562515	-1.05111	0.0116583	1.65778	sp.Q9NS00.C1GLT_HUMAN	0.0191784	0.465854	0.1847	-0.691758	0.0561355	1.15761	Scaling	Scaling	Scaling	Scaling
C1QBP	0.761302	-0.311878	0.00510494	-0.622819	0.763705	0.310941	sp.Q07021.C1QBP_HUMAN	0.0908538	0.358522	0.0789964	-0.517136	0.0113926	0.875658	Anti-Scaling	Scaling	Scaling	Scaling
C20orf27	0.50052	0.153411	0.0173648	-0.655175	0.0163098	0.808585	sp.Q9GZN8.2.CT027_HUMAN	0.766369	-0.10647	0.108636	-0.607472	0.289826	0.501002	Buffering	Scaling	Anti-Scaling	Scaling
C2CD2L	0.2621	0.457036	0.0160232	-0.853617	0.0150755	1.31065	sp.O14523.2.C2C2L_HUMAN	0.793831	-0.0732248	0.0319618	-0.560602	0.165741	0.487377	Scaling	Scaling	Buffering	Scaling
C2CD3	0.300333	0.2407	0.840221	0.0519437	0.55807	0.188756	sp.Q4AC94.C2CD3_HUMAN	0.249625	0.467275	2.17232e-05	-0.47095	0.062513	0.938225	Buffering	Buffering	Scaling	Scaling
C2CD5	0.0245073	0.650823	0.866107	-0.0904123	0.251665	0.741235	tr.B4DRN7.B4DRN7_HUMAN	0.244315	0.227092	0.507362	0.263621	0.92761	-0.0365298	Scaling	Buffering	Buffering	Anti-Scaling
C3	0.000232078	-1.39843	0.380943	2.53111	0.225192	-3.92954	sp.P01024.CO3_HUMAN	0.795137	-0.0417642	0.820474	0.335046	0.798592	-0.37681	Anti-Scaling	Anti-Scaling	Buffering	Anti-Scaling
C6orf203	0.700522	0.367606	0.0024299	-0.631877	0.35006	0.999482	sp.Q9P0P8.CF203_HUMAN	0.350932	0.555435	0.36626	-0.260884	0.211457	0.816318	Scaling	Scaling	Scaling	Scaling
C7orf25	0.000938077	0.557823	0.0973724	-0.884506	0.0241617	1.44233	sp.Q9BPX7.2.CG025_HUMAN	0.557867	0.0902465	0.878681	-0.0416279	0.653081	0.131874	Scaling	Scaling	Buffering	Buffering
C7orf26	6.4325e-05	0.500894	0.106555	-0.425348	0.00946539	0.926242	sp.Q96N11.CG026_HUMAN	0.317296	0.112826	0.0073364	-0.750294	0.00431459	0.86312	Scaling	Scaling	Buffering	Scaling
C7orf50	0.0016713	0.553615	0.316132	-0.776783	0.129439	1.3304	sp.Q9BRJ6.CG050_HUMAN	0.39435	0.119168	0.148642	-0.74216	0.107673	0.861328	Scaling	Scaling	Buffering	Scaling
C9orf40	0.370138	-0.275055	0.0548404	-0.511492	0.498575	0.236437	sp.Q8IXQ3.CI040_HUMAN	0.327931	-0.505923	0.795336	0.179564	0.401261	-0.685487	Anti-Scaling	Scaling	Anti-Scaling	Anti-Scaling
C9orf64	0.462405	0.250274	0.809023	-0.0595342	0.375371	0.309808	sp.Q5T6V5.CI064_HUMAN	0.0819763	-0.379755	0.655739	-0.119661	0.378796	-0.260094	Scaling	Buffering	Anti-Scaling	Buffering
C9orf78	0.2658	0.300109	0.123946	-0.419746	0.0510558	0.719855	sp.Q9NZ63.CI078_HUMAN	0.644923	-0.111819	0.951887	-0.02669	0.860001	-0.0851288	Scaling	Scaling	Anti-Scaling	Buffering
C9orf85	0.0175203	0.389004	0.357851	-0.209492	0.0375005	0.598495	sp.Q96MD7.1.CI085_HUMAN	0.24677	0.473777	0.605613	-0.1187	0.173031	0.592477	Scaling	Buffering	Scaling	Buffering
CA9	0.398015	0.230006	0.570262	0.313659	0.873145	-0.0836532	sp.Q16790.CAH9_HUMAN	0.982696	-0.0256752	0.637607	0.336635	0.784889	-0.36231	Buffering	Anti-Scaling	Buffering	Anti-Scaling
CAAP1	0.536167	0.306775	0.000226158	-0.632282	0.117819	0.939058	sp.Q9H8G2.CAAP1_HUMAN	0.475479	0.357532	0.00262573	-0.432127	0.167806	0.789658	Scaling	Scaling	Scaling	Scaling
CAB39L	0.563914	0.393419	0.233256	-0.330738	0.318459	0.724156	sp.Q9H9S4.CB39L_HUMAN	0.249132	1.44358	0.28986	-0.334458	0.176074	1.77804	Scaling	Scaling	Scaling	Scaling
CACTIN	0.18067	0.195253	0.749543	-0.173475	0.519742	0.368728	sp.Q8WUQ7.2.CATIN_HUMAN	0.622803	0.2001	0.718486	0.16239	0.945918	0.0377097	Buffering	Buffering	Buffering	Anti-Scaling
CAD	0.556339	0.317124	0.0105998	-0.517748	0.178471	0.834872	sp.P27708.PYR1_HUMAN	0.729081	-0.195607	0.157587	-0.554933	0.571159	0.359325	Scaling	Scaling	Anti-Scaling	Scaling
CADM1	0.67968	-0.520835	0.104369	1.3116	0.208655	-1.83244	sp.Q9BY67.3.CADM1_HUMAN	0.969388	0.0430862	0.204609	0.754737	0.561967	-0.71165	Anti-Scaling	Anti-Scaling	Buffering	Anti-Scaling
CADM4	0.840839	-0.201283	0.837485	-0.465695	0.912108	0.264411	sp.Q8NFZ8.CADM4_HUMAN	0.759516	0.151048	0.206463	-1.67491	0.171652	1.82595	Anti-Scaling	Scaling	Buffering	Scaling
CALB2	0.20914	1.99196	0.800671	0.210971	0.292164	1.78099	sp.P22676.CALB2_HUMAN	0.0509948	2.14167	0.95584	-0.0335961	0.0592533	2.17526	Scaling	Anti-Scaling	Scaling	Buffering
CALCOCO1	0.67838	-0.178177	0.828314	0.193624	0.698764	-0.371801	sp.Q9P1Z2.CACO1_HUMAN	0.612138	0.144964	0.93141	0.0853321	0.953	0.0596324	Anti-Scaling	Anti-Scaling	Buffering	Buffering
CALM2	0.303717	0.272744	0.0942604	-0.679798	0.0401591	0.952541	tr.H0Y7A7.H0Y7A7_HUMAN	0.436684	-0.405171	0.994724	0.00488293	0.632328	-0.410054	Scaling	Scaling	Anti-Scaling	Buffering
CALML3	0.0673936	-0.126708	0.519408	0.186457	0.273405	-0.313166	sp.P27482.CALL3_HUMAN	0.0787605	-0.804931	0.484986	-0.248238	0.244648	-0.556693	Anti-Scaling	Anti-Scaling	Anti-Scaling	Buffering
CALR	0.839538	-0.188543	0.48729	-0.579997	0.732884	0.391454	sp.P27797.CALR_HUMAN	0.968062	-0.0224811	0.988846	-0.0106348	0.989412	-0.0118463	Anti-Scaling	Scaling	Buffering	Buffering
CAMK1D	0.447645	0.813717	0.734111	-0.160389	0.390517	0.974106	sp.Q8IU85.KCC1D_HUMAN	0.409004	0.660816	0.280351	-0.38978	0.228461	1.0506	Scaling	Buffering	Scaling	Scaling
CAMK2B	0.411679	0.242309	0.442031	-0.15553	0.196532	0.397839	sp.Q13554.KCC2B_HUMAN	0.834824	0.0309853	0.427861	0.531413	0.453344	-0.500427	Buffering	Buffering	Buffering	Anti-Scaling
CAMKK2	0.461175	0.289503	0.591855	-0.178203	0.335089	0.467706	sp.Q96RR4.KKCC2_HUMAN	0.688719	0.134111	0.0120557	-0.733377	0.0743502	0.867489	Scaling	Buffering	Buffering	Scaling
CAMKMT	0.000872555	0.324872	0.0869811	-0.865056	0.0411644	1.18993	sp.Q7Z624.CMKMT_HUMAN	0.742446	0.185568	0.0351394	-0.574041	0.257216	0.759609	Scaling	Scaling	Buffering	Scaling
CAMSAP1	0.99127	-0.00156206	0.694358	-0.0859248	0.724474	0.0843628	sp.Q5T5Y3.3.CAMP1_HUMAN	0.989079	0.0022768	0.445783	-0.217459	0.478769	0.219736	Buffering	Buffering	Buffering	Buffering
CAMSAP3	0.0799734	-1.3674	0.935416	-0.102378	0.378498	-1.26502	sp.Q9P1Y5.CAMP3_HUMAN	0.165671	-0.929626	0.480214	-0.663724	0.783633	-0.265903	Anti-Scaling	Buffering	Anti-Scaling	Scaling
CAND1	0.585799	0.20732	0.91993	0.0276347	0.682597	0.179686	sp.Q86VP6.CAND1_HUMAN	0.30731	-0.302603	0.714442	0.158847	0.366105	-0.46145	Buffering	Buffering	Anti-Scaling	Anti-Scaling
CAPG	0.574772	-0.943665	0.60733	-0.921782	0.992328	-0.0218836	sp.P40121.CAPG_HUMAN	0.277115	-1.01404	0.431822	-0.5998	0.694161	-0.414242	Anti-Scaling	Scaling	Anti-Scaling	Scaling
CAPN1	0.295522	0.505621	0.1607	0.557917	0.926027	-0.0522965	sp.P07384.CAN1_HUMAN	0.725477	0.100756	0.48628	0.189139	0.809807	-0.0883832	Scaling	Anti-Scaling	Buffering	Anti-Scaling
CAPN15	0.606864	-0.150383	0.0707685	-0.727093	0.205153	0.576711	sp.O75808.CAN15_HUMAN	0.0899115	-0.227564	0.751772	-0.0503917	0.274103	-0.177173	Anti-Scaling	Scaling	Anti-Scaling	Buffering
CAPN5	0.000830465	-1.36826	0.17218	0.838521	0.00414478	-2.20678	sp.O15484.CAN5_HUMAN	0.00480106	-0.926593	0.700609	-0.145451	0.0748308	-0.781142	Anti-Scaling	Anti-Scaling	Anti-Scaling	Buffering
CAPNS1	0.102136	0.608099	0.563174	-0.329211	0.178747	0.93731	sp.P04632.CPNS1_HUMAN	0.937044	0.0144237	0.602985	0.266837	0.628901	-0.252413	Scaling	Scaling	Buffering	Anti-Scaling
CAPS	0.736888	-0.134802	0.990158	-0.00788037	0.85411	-0.126922	sp.Q13938.CAYP1_HUMAN	0.248615	-0.428301	0.261355	-0.738216	0.612584	0.309915	Anti-Scaling	Buffering	Anti-Scaling	Scaling
CARD11	0.244792	0.591533	0.783301	0.339694	0.844951	0.251839	sp.Q9BXL7.CAR11_HUMAN	0.479995	0.378678	0.65038	0.550452	0.891442	-0.171774	Scaling	Anti-Scaling	Scaling	Anti-Scaling
CARD16	0.146222	-0.975114	0.639753	0.373017	0.165602	-1.34813	sp.Q5EG05.CAR16_HUMAN	0.775259	-0.354961	0.943782	-0.0713472	0.84461	-0.283614	Anti-Scaling	Anti-Scaling	Anti-Scaling	Buffering
CARHSP1	0.750235	0.226492	0.008901	-1.0658	0.156033	1.29229	sp.Q9Y2V2.CHSP1_HUMAN	0.283613	-1.09279	0.687226	-0.164667	0.35033	-0.928119	Buffering	Scaling	Anti-Scaling	Buffering
CARM1	0.876379	0.072303	0.352893	-0.648575	0.351156	0.720878	sp.Q86X55.CARM1_HUMAN	0.106126	0.498345	0.133086	-0.367098	0.0271492	0.865443	Buffering	Scaling	Scaling	Scaling
CARS2	7.8873e-06	0.633786	0.0378739	-0.600562	0.000455665	1.23435	sp.Q9HA77.SYCM_HUMAN	0.0600009	0.865866	0.326432	-0.326016	0.0275957	1.19188	Scaling	Scaling	Scaling	Scaling
CASP1	0.725676	0.342424	0.990085	0.00910557	0.771106	0.333318	sp.P29466.CASP1_HUMAN	0.850939	0.108741	0.581767	-0.262971	0.58613	0.371712	Scaling	Buffering	Buffering	Scaling
CASP4	0.99696	0.00392744	0.846605	0.136282	0.911906	-0.132355	sp.P49662.CASP4_HUMAN	0.788928	0.114614	0.983182	0.00644691	0.82654	0.108167	Buffering	Anti-Scaling	Buffering	Buffering
CASP5	0.00222864	-0.214434	0.0229975	-0.178325	0.381821	-0.0361088	sp.P51878.5.CASP5_HUMAN	0.300218	0.235807	0.293147	0.478379	0.573658	-0.242572	Anti-Scaling	Buffering	Buffering	Anti-Scaling
CBFA2T3	5.96072e-08	-1.18323	0.788751	0.202559	0.0900549	-1.38579	sp.O75081.MTG16_HUMAN	0.105211	-0.470983	0.52687	1.7084	0.434258	-2.17938	Anti-Scaling	Anti-Scaling	Anti-Scaling	Anti-Scaling
CBFB	0.422251	-0.292273	0.0351619	-0.849356	0.253254	0.557083	sp.Q13951.2.PEBB_HUMAN	0.869896	-0.0654848	0.0255384	-0.384215	0.437628	0.31873	Anti-Scaling	Scaling	Buffering	Scaling
CBFB	0.422251	-0.292273	0.0351619	-0.849356	0.253254	0.557083	sp.Q13951.PEBB_HUMAN	0.827446	-0.150275	0.487341	-0.182949	0.962957	0.0326734	Anti-Scaling	Scaling	Anti-Scaling	Buffering
CBL	0.397623	0.178781	0.254848	-0.316203	0.13466	0.494984	sp.P22681.CBL_HUMAN	0.284042	0.411598	0.412183	-0.295433	0.161856	0.707031	Buffering	Scaling	Scaling	Scaling
CBWD1	0.274678	0.43595	0.0128579	-0.580522	0.0399912	1.01647	sp.Q9BRT8.CBWD1_HUMAN	0.342474	0.582177	0.145869	-0.326652	0.175993	0.908828	Scaling	Scaling	Scaling	Scaling
CBX3	0.000799658	0.483216	0.0604764	-0.604011	0.00605138	1.08723	sp.Q13185.CBX3_HUMAN	0.893315	0.0224092	0.552421	0.233471	0.597988	-0.211061	Scaling	Scaling	Buffering	Anti-Scaling
CBX5	0.39861	0.479909	0.838764	-0.0562743	0.371937	0.536183	sp.P45973.CBX5_HUMAN	0.0885976	0.957329	0.325593	-0.162598	0.0604	1.11993	Scaling	Buffering	Scaling	Buffering
CC2D1A	0.241392	0.203283	0.678419	-0.318663	0.514688	0.521946	sp.Q6P1N0.C2D1A_HUMAN	0.499138	0.0955325	0.515866	-0.303128	0.413164	0.39866	Buffering	Scaling	Buffering	Scaling
CCAR2	0.0657653	0.39292	0.00285419	-0.635381	0.000402213	1.0283	sp.Q8N163.CCAR2_HUMAN	0.751548	0.0542279	0.0272917	-0.391495	0.0563982	0.445723	Scaling	Scaling	Buffering	Scaling
CCDC102A	0.972241	0.0114438	0.0213963	-0.827379	0.06235	0.838822	sp.Q96A19.C102A_HUMAN	0.533642	0.108263	0.56325	-0.184268	0.383185	0.292531	Buffering	Scaling	Buffering	Buffering
CCDC124	0.528859	0.105896	0.230142	-0.551474	0.17019	0.657371	sp.Q96CT7.CC124_HUMAN	0.206544	1.11573	0.449908	-0.381551	0.120709	1.49728	Buffering	Scaling	Scaling	Scaling
CCDC126	0.000229926	0.788838	0.00136433	-1.10372	2.26412e-06	1.89256	sp.Q96EE4.CC126_HUMAN	0.0132483	0.774801	0.222054	-3.56451	0.157852	4.33931	Scaling	Scaling	Scaling	Scaling
CCDC130	0.293477	0.553788	0.988566	0.0105964	0.523925	0.543191	sp.P13994.CC130_HUMAN	0.0661663	0.23217	0.636996	-0.126313	0.25019	0.358483	Scaling	Buffering	Buffering	Buffering
CCDC15	0.162515	0.254048	0.815985	-0.0624691	0.296133	0.316517	sp.Q0P6D6.CCD15_HUMAN	0.895648	-0.0557101	0.663993	-0.295906	0.744709	0.240196	Scaling	Buffering	Buffering	Scaling
CCDC168	0.894959	0.00305014	0.510264	-0.00933939	0.634246	0.0123895	sp.Q8NDH2.CC168_HUMAN	0.745299	0.548339	0.747918	-0.0544454	0.720723	0.602785	Buffering	Buffering	Scaling	Buffering
CCDC175	0.000219163	-0.0562306	0.000219163	-0.0562306	NA	0	sp.P0C221.CC175_HUMAN	0.580798	0.44354	0.747233	0.0500689	0.62166	0.393471	Buffering	Buffering	Scaling	Buffering
CCDC25	0.00671769	0.439874	0.0945945	-0.458557	0.00519483	0.898431	sp.Q86WR0.CCD25_HUMAN	0.0223588	0.722002	0.275664	-0.346251	0.0119055	1.06825	Scaling	Scaling	Scaling	Scaling
CCDC28A	0.633421	0.36069	0.0853394	-0.473558	0.325021	0.834248	sp.Q8IWP9.CC28A_HUMAN	0.378882	-1.27389	0.554094	-0.157758	0.430625	-1.11613	Scaling	Scaling	Anti-Scaling	Buffering
CCDC59	0.00212958	0.499164	0.251768	-0.363922	0.0514914	0.863086	sp.Q9P031.TAP26_HUMAN	0.156387	0.417447	0.475099	-0.224904	0.124162	0.642352	Scaling	Scaling	Scaling	Buffering
CCDC77	0.0225534	0.348413	0.00127696	-0.489253	5.96353e-05	0.837666	sp.Q9BR77.CCD77_HUMAN	0.553457	0.168787	0.150628	-0.778295	0.095245	0.947081	Scaling	Scaling	Buffering	Scaling
CCDC82	0.530694	0.229248	0.813804	-0.056764	0.484539	0.286012	sp.Q8N4S0.CCD82_HUMAN	0.0259827	1.04823	0.0614719	-0.402881	0.00577015	1.45111	Buffering	Buffering	Scaling	Scaling
CCDC84	0.284377	0.331861	0.0430807	-0.701301	0.019906	1.03316	sp.Q86UT8.CCD84_HUMAN	0.289285	0.371975	3.75981e-06	-1.02818	0.00677265	1.40016	Scaling	Scaling	Scaling	Scaling
CCDC85B	0.234062	0.415094	0.189998	0.507358	0.839874	-0.0922637	sp.Q15834.CC85B_HUMAN	0.268632	0.366775	0.926295	-0.0198098	0.281276	0.386585	Scaling	Anti-Scaling	Scaling	Buffering
CCDC85C	0.0660098	1.45477	0.487153	-0.580201	0.0625108	2.03497	sp.A6NKD9.CC85C_HUMAN	0.78981	-0.333757	0.118368	-0.710416	0.770131	0.376659	Scaling	Scaling	Anti-Scaling	Scaling
CCDC86	0.238567	0.37194	0.546711	-0.192202	0.187974	0.564143	sp.Q9H6F5.CCD86_HUMAN	0.496816	0.140716	0.0300214	-0.45977	0.0331448	0.600486	Scaling	Buffering	Buffering	Scaling
CCDC88A	0.0888188	1.11052	0.336672	-0.512867	0.0434168	1.62339	sp.Q3V6T2.GRDN_HUMAN	0.128897	0.664581	0.564816	-0.338654	0.16152	1.00324	Scaling	Scaling	Scaling	Scaling
CCDC88B	0.557686	0.503868	0.582889	0.265224	0.798191	0.238643	sp.A6NC98.CC88B_HUMAN	0.685908	0.349884	0.538058	-0.424394	0.463834	0.774278	Scaling	Anti-Scaling	Scaling	Scaling
CCDC88C	0.331014	0.761896	0.000219244	-2.33727	0.00647266	3.09916	sp.Q9P219.DAPLE_HUMAN	0.109158	-0.264805	0.0130993	-0.479746	0.246485	0.21494	Scaling	Scaling	Anti-Scaling	Scaling
CCDC9	0.00887233	0.478898	0.396668	-0.624176	0.194863	1.10307	sp.Q9Y3X0.CCDC9_HUMAN	0.575478	0.107743	0.047496	-0.190087	0.138296	0.29783	Scaling	Scaling	Buffering	Buffering
CCDC90B	0.0897688	0.490502	0.179318	-0.374498	0.0256297	0.865	sp.Q9GZT6.CC90B_HUMAN	0.0259424	0.590094	0.0257336	-0.417396	0.00187349	1.00749	Scaling	Scaling	Scaling	Scaling
CCDC91	0.00970978	0.583321	0.675632	-0.725182	0.473603	1.3085	sp.Q7Z6B0.CCD91_HUMAN	0.00180483	0.887256	0.683923	-0.363622	0.24029	1.25088	Scaling	Scaling	Scaling	Scaling
CCDC92	0.608446	-0.39343	0.911495	-0.0729395	0.733187	-0.32049	sp.Q53HC0.CCD92_HUMAN	0.82272	0.122798	0.972162	0.0325507	0.928788	0.090247	Anti-Scaling	Buffering	Buffering	Buffering
CCDC97	0.194515	0.516076	0.660635	-0.128996	0.172984	0.645073	sp.Q96F63.CCD97_HUMAN	0.809631	0.0844784	0.705877	0.135682	0.912751	-0.0512036	Scaling	Buffering	Buffering	Anti-Scaling
CCM2	0.00187439	0.606863	0.0728497	-0.620346	0.00479355	1.22721	sp.Q9BSQ5.CCM2_HUMAN	0.00242148	0.540561	0.481695	0.223789	0.35385	0.316772	Scaling	Scaling	Scaling	Anti-Scaling
CCNC	0.344789	0.115726	0.0124588	-0.69103	0.00645387	0.806756	sp.P24863.CCNC_HUMAN	0.888956	-0.0412297	0.234276	-0.57186	0.312228	0.53063	Buffering	Scaling	Buffering	Scaling
CCND1	0.838672	0.266043	0.218209	1.26903	0.520766	-1.00299	sp.P24385.CCND1_HUMAN	0.972563	-0.0151594	0.1508	0.811538	0.207586	-0.826698	Scaling	Anti-Scaling	Buffering	Anti-Scaling
CCNK	0.150851	0.535125	0.043658	-0.673539	0.0146282	1.20866	sp.O75909.CCNK_HUMAN	0.228891	0.295166	0.17779	-0.0805013	0.14275	0.375667	Scaling	Scaling	Scaling	Buffering
CCNT1	0.165398	0.397852	0.949475	0.0189527	0.325175	0.3789	sp.O60563.CCNT1_HUMAN	0.253134	0.415017	0.973641	0.0167908	0.502557	0.398226	Scaling	Buffering	Scaling	Buffering
CCNY	0.847778	-0.110681	0.000240827	-0.648337	0.380881	0.537656	sp.Q8ND76.CCNY_HUMAN	0.299325	0.817405	0.377077	-0.162935	0.233317	0.980339	Anti-Scaling	Scaling	Scaling	Buffering
CCS	0.189403	-0.217642	0.617661	-0.147541	0.824651	-0.0701008	sp.O14618.CCS_HUMAN	0.971943	0.0148765	0.351619	-0.180323	0.660456	0.195199	Anti-Scaling	Buffering	Buffering	Buffering
CCT2	0.0170336	0.623089	0.646521	0.798545	0.917451	-0.175456	sp.P78371.TCPB_HUMAN	0.953379	-0.0107005	0.566921	0.327569	0.562561	-0.33827	Scaling	Anti-Scaling	Buffering	Anti-Scaling
CCT4	0.198538	0.388832	0.261389	-0.513121	0.0947953	0.901953	sp.P50991.TCPD_HUMAN	0.620535	-0.176233	0.380543	-0.319016	0.758529	0.142783	Scaling	Scaling	Anti-Scaling	Scaling
CCT6A	0.00131409	0.420687	0.129962	-0.552594	0.0296382	0.973281	sp.P40227.TCPZ_HUMAN	0.704144	0.0428275	0.661922	-0.0610458	0.518202	0.103873	Scaling	Scaling	Buffering	Buffering
CCT7	0.0329909	0.731577	0.251392	-0.45658	0.0257542	1.18816	sp.Q99832.TCPH_HUMAN	0.715829	-0.0919074	0.134412	-0.374043	0.372562	0.282136	Scaling	Scaling	Buffering	Scaling
CCZ1	7.20863e-05	0.520626	0.080081	-0.694849	0.0147696	1.21547	sp.P86791.CCZ1_HUMAN	0.200221	0.159692	0.247788	-0.271579	0.10049	0.431271	Scaling	Scaling	Buffering	Scaling
CD109	0.566701	-0.683489	0.676388	-0.374023	0.820968	-0.309467	sp.Q6YHK3.CD109_HUMAN	0.767277	-0.195257	0.829674	0.141506	0.699883	-0.336763	Anti-Scaling	Scaling	Anti-Scaling	Anti-Scaling
CD22	0.751389	-0.350839	0.432703	2.46683	0.38594	-2.81767	sp.P20273.CD22_HUMAN	0.467888	-0.617684	0.937081	0.097307	0.614173	-0.714991	Anti-Scaling	Anti-Scaling	Anti-Scaling	Buffering
CD274	0.606182	0.776171	0.392349	0.402421	0.805319	0.373749	sp.Q9NZQ7.PD1L1_HUMAN	0.574804	0.830445	0.316815	0.546112	0.849989	0.284333	Scaling	Anti-Scaling	Scaling	Anti-Scaling
CD2BP2	0.992794	-0.00444137	0.38051	-0.321293	0.591964	0.316852	sp.O95400.CD2B2_HUMAN	0.318526	0.411667	0.441714	0.27251	0.769143	0.139157	Buffering	Scaling	Scaling	Anti-Scaling
CD320	0.29823	-1.86664	0.124339	-0.598751	0.445199	-1.26789	sp.Q9NPF0.CD320_HUMAN	0.137202	-1.06367	0.664969	-0.371988	0.477037	-0.691687	Anti-Scaling	Scaling	Anti-Scaling	Scaling
CD33	0.988552	-0.016725	0.78755	0.496012	0.805124	-0.512737	sp.P20138.CD33_HUMAN	0.646401	0.80583	0.480404	-0.574713	0.463615	1.38054	Buffering	Anti-Scaling	Scaling	Scaling
CD3EAP	0.20257	0.522203	0.358831	0.343411	0.707816	0.178792	sp.O15446.2.RPA34_HUMAN	0.624542	-0.125642	0.737208	-0.212225	0.894443	0.0865832	Scaling	Anti-Scaling	Anti-Scaling	Buffering
CD63	0.0576934	0.545508	0.496313	0.434185	0.856712	0.111323	sp.P08962.CD63_HUMAN	0.0486427	0.641631	0.2862	1.08641	0.621572	-0.444781	Scaling	Anti-Scaling	Scaling	Anti-Scaling
CD9	0.733084	0.353712	0.0162761	-4.38492	0.0038655	4.73863	sp.P21926.CD9_HUMAN	0.675324	0.235219	0.0174413	-2.04914	0.00630669	2.28435	Scaling	Scaling	Buffering	Scaling
CD93	0.429225	0.507245	0.0514964	-0.313688	0.204777	0.820933	sp.Q9NPY3.C1QR1_HUMAN	0.969521	0.0326159	0.297231	-0.549642	0.530006	0.582258	Scaling	Scaling	Buffering	Scaling
CDC123	0.0207424	0.701774	1.48443e-09	-1.09346	0.000154192	1.79523	sp.O75794.CD123_HUMAN	0.00941099	0.845349	0.0678191	-0.370545	0.000833555	1.21589	Scaling	Scaling	Scaling	Scaling
CDC16	0.0398824	0.629679	0.0412714	-0.482134	0.0034321	1.11181	sp.Q13042.CDC16_HUMAN	0.0615661	0.534551	0.971442	0.00740396	0.10411	0.527147	Scaling	Scaling	Scaling	Buffering
CDC25B	0.380015	0.284564	0.00160291	-0.672898	0.0126046	0.957462	sp.P30305.MPIP2_HUMAN	0.34503	0.323171	0.372741	-0.318649	0.165736	0.64182	Scaling	Scaling	Scaling	Scaling
CDC26	0.00843707	0.436572	0.0510915	-0.199226	0.00118368	0.635797	sp.Q8NHZ8.CDC26_HUMAN	0.0790307	0.342063	0.812236	-0.100734	0.339846	0.442798	Scaling	Buffering	Scaling	Buffering
CDC37	0.321751	0.265925	0.298991	-0.400414	0.140796	0.666339	sp.Q16543.CDC37_HUMAN	0.00638723	0.846938	0.806343	-0.102781	0.110723	0.949719	Scaling	Scaling	Scaling	Buffering
CDC37L1	0.854283	0.14134	0.00102767	-0.552083	0.400386	0.693423	sp.Q7L3B6.CD37L_HUMAN	0.339712	0.373835	0.0184611	-0.454656	0.0764259	0.828491	Buffering	Scaling	Scaling	Scaling
CDC40	0.830512	0.140578	0.0384192	-0.66336	0.297407	0.803938	sp.O60508.PRP17_HUMAN	0.384213	0.063066	0.00587737	-0.497407	0.00333222	0.560473	Buffering	Scaling	Buffering	Scaling
CDC42BPB	0.707201	0.380639	0.602986	-0.243697	0.563001	0.624336	sp.Q9Y5S2.MRCKB_HUMAN	0.902154	0.0816356	0.0496131	0.43664	0.604618	-0.355005	Scaling	Buffering	Buffering	Anti-Scaling
CDC42BPG	0.545014	0.468643	0.848542	-0.151183	0.557159	0.619826	sp.Q6DT37.MRCKG_HUMAN	0.607623	0.851214	0.509649	0.276101	0.726937	0.575113	Scaling	Buffering	Scaling	Anti-Scaling
CDC42EP2	0.693137	0.262195	0.934021	0.0416736	0.781738	0.220522	sp.O14613.BORG1_HUMAN	0.942581	-0.046052	0.985204	0.011757	0.946138	-0.057809	Scaling	Buffering	Buffering	Buffering
CDC42EP3	0.76046	0.550013	0.915851	-0.126675	0.744222	0.676687	sp.Q9UKI2.BORG2_HUMAN	0.458603	0.816955	0.578347	0.510274	0.815049	0.306681	Scaling	Buffering	Scaling	Anti-Scaling
CDCA2	0.476864	0.15015	0.00195882	-0.73188	0.00264322	0.88203	sp.Q69YH5.CDCA2_HUMAN	0.261566	0.340411	0.0559364	-0.420233	0.0297651	0.760644	Buffering	Scaling	Scaling	Scaling
CDCA3	0.0199228	0.362921	0.219527	-0.783492	0.114936	1.14641	sp.Q99618.CDCA3_HUMAN	0.418018	0.193364	0.269237	-0.559215	0.166309	0.752579	Scaling	Scaling	Buffering	Scaling
CDCA5	0.535972	0.145976	0.696686	-0.159209	0.503346	0.305185	sp.Q96FF9.CDCA5_HUMAN	0.193952	0.349285	0.629572	-0.17658	0.21535	0.525865	Buffering	Buffering	Scaling	Buffering
CDCA7L	0.0285721	0.799524	0.864856	-0.249853	0.491977	1.04938	sp.Q96GN5.CDA7L_HUMAN	0.85614	0.0395851	0.183009	0.71709	0.197535	-0.677505	Scaling	Buffering	Buffering	Anti-Scaling
CDH1	0.481928	0.812951	0.989102	0.0155072	0.59725	0.797443	sp.P12830.CADH1_HUMAN	0.699104	0.297915	0.0716746	-1.04293	0.144303	1.34085	Scaling	Buffering	Scaling	Scaling
CDH13	0.423752	0.93653	0.997116	0.00238977	0.462977	0.93414	sp.P55290.4.CAD13_HUMAN	0.577192	0.429482	0.936476	0.0416689	0.647611	0.387813	Scaling	Buffering	Scaling	Buffering
CDH3	0.6985	0.614327	0.827428	0.240049	0.839009	0.374277	sp.P22223.CADH3_HUMAN	0.549893	0.543059	0.48485	-0.326052	0.377508	0.869111	Scaling	Anti-Scaling	Scaling	Scaling
CDIPT	0.364796	0.143358	0.130011	-0.397827	0.0659341	0.541185	sp.O14735.CDIPT_HUMAN	0.0615845	0.417973	0.0902273	-0.453458	0.00964035	0.871431	Buffering	Scaling	Scaling	Scaling
CDK10	0.308532	-0.838024	0.524688	-0.199543	0.449223	-0.638481	sp.Q15131.CDK10_HUMAN	0.203711	0.451464	0.723422	-0.0964312	0.191428	0.547895	Anti-Scaling	Buffering	Scaling	Buffering
CDK13	0.000404196	0.484563	0.0671865	-0.65464	0.010512	1.1392	sp.Q14004.CDK13_HUMAN	0.00535469	0.18388	0.00912316	-0.449591	0.0017267	0.63347	Scaling	Scaling	Buffering	Scaling
CDK19	0.437386	0.393462	0.298332	-0.403155	0.196286	0.796617	sp.Q9BWU1.CDK19_HUMAN	0.653237	0.220444	0.434829	-0.1731	0.460005	0.393544	Scaling	Scaling	Buffering	Buffering
CDK2	0.426766	0.463162	0.134977	-0.4702	0.161929	0.933362	sp.P24941.CDK2_HUMAN	0.438192	-0.322916	0.84383	0.094416	0.486878	-0.417332	Scaling	Scaling	Anti-Scaling	Buffering
CDK4	0.251425	0.210535	0.537657	0.727621	0.653576	-0.517085	sp.P11802.CDK4_HUMAN	0.768121	0.104945	0.290487	1.61696	0.31353	-1.51201	Buffering	Anti-Scaling	Buffering	Anti-Scaling
CDK5RAP2	0.00712402	-0.414764	0.0941172	-0.289619	0.474505	-0.125145	sp.Q96SN8.CK5P2_HUMAN	0.794444	-0.0456187	0.988477	-0.00149366	0.815336	-0.044125	Anti-Scaling	Scaling	Buffering	Buffering
CDK8	0.305101	0.487001	0.00464981	-0.445903	0.0763096	0.932904	sp.P49336.CDK8_HUMAN	0.401411	0.500847	0.962936	0.00814276	0.41611	0.492704	Scaling	Scaling	Scaling	Buffering
CDK9	0.0160195	0.415221	0.100605	-0.361939	0.00649723	0.77716	sp.P50750.2.CDK9_HUMAN	0.930876	0.00871317	0.150482	-0.186536	0.186073	0.195249	Scaling	Scaling	Buffering	Buffering
CDKN1B	0.651523	0.122264	0.319098	0.313722	0.59782	-0.191458	sp.P46527.CDN1B_HUMAN	0.0444043	1.00879	0.701394	0.294022	0.415598	0.714773	Buffering	Anti-Scaling	Scaling	Anti-Scaling
CDKN2A	0.140478	-2.58587	0.315356	-0.797518	0.283026	-1.78836	sp.P42771.CD2A1_HUMAN	0.282677	-0.334018	0.481723	-0.375512	0.937132	0.041494	Anti-Scaling	Scaling	Anti-Scaling	Scaling
CDR2	0.339297	0.50985	0.311432	-0.263583	0.189039	0.773433	sp.Q01850.CDR2_HUMAN	0.337254	0.694425	0.522849	-0.171771	0.254324	0.866197	Scaling	Scaling	Scaling	Buffering
CDS2	0.395428	0.250785	0.0720256	-0.443167	0.0622083	0.693952	sp.O95674.CDS2_HUMAN	0.0252098	0.585537	0.107369	-0.46386	0.00503057	1.0494	Scaling	Scaling	Scaling	Scaling
CDT1	0.329408	-0.28052	0.838318	-0.0826049	0.672478	-0.197915	sp.Q9H211.CDT1_HUMAN	0.453194	-0.100911	0.358785	0.143568	0.150605	-0.244479	Anti-Scaling	Buffering	Anti-Scaling	Anti-Scaling
CEACAM1	0.653275	-0.273672	0.324167	-0.456354	0.788141	0.182682	sp.P13688.CEAM1_HUMAN	0.922825	-0.0493175	0.256382	-1.10495	0.282946	1.05563	Anti-Scaling	Scaling	Buffering	Scaling
CEACAM5	0.602875	-0.244709	0.00158141	-0.772866	0.245598	0.528157	sp.P06731.CEAM5_HUMAN	0.564835	0.441973	0.926903	-0.0744505	0.616049	0.516424	Anti-Scaling	Scaling	Scaling	Buffering
CEACAM6	0.523996	0.68594	1.96546e-05	-0.997247	0.148042	1.68319	sp.P40199.CEAM6_HUMAN	0.698972	0.458426	0.455228	0.346278	0.923744	0.112148	Scaling	Scaling	Scaling	Anti-Scaling
CEBPG	0.403171	0.20511	0.0333501	-0.77968	0.0115831	0.98479	sp.P53567.CEBPG_HUMAN	0.154382	0.429844	0.450556	-0.505979	0.218462	0.935823	Buffering	Scaling	Scaling	Scaling
CEBPZ	0.934093	0.0259447	0.0375495	-0.811486	0.0658314	0.837431	sp.Q03701.CEBPZ_HUMAN	0.307316	0.3294	0.0366653	-0.449345	0.0539266	0.778744	Buffering	Scaling	Scaling	Scaling
CELF2	0.796093	-0.354075	0.713183	0.212142	0.693942	-0.566216	sp.O95319.CELF2_HUMAN	0.90641	-0.0722535	0.952879	0.0154542	0.889857	-0.0877076	Anti-Scaling	Anti-Scaling	Buffering	Buffering
CENPB	0.382682	0.211362	0.0183705	-0.604851	0.013341	0.816213	sp.P07199.CENPB_HUMAN	0.102942	0.221776	0.084149	-0.23598	0.010097	0.457756	Buffering	Scaling	Buffering	Buffering
CENPJ	0.0217633	0.871979	0.0015356	-0.59332	0.00131425	1.4653	sp.Q9HC77.CENPJ_HUMAN	0.163402	0.560599	0.0935469	-0.385462	0.0391154	0.946061	Scaling	Scaling	Scaling	Scaling
CENPO	0.184923	0.457391	0.156957	-0.566976	0.0450824	1.02437	sp.Q9BU64.CENPO_HUMAN	0.229209	0.372119	0.128996	-0.438344	0.0495267	0.810463	Scaling	Scaling	Scaling	Scaling
CENPT	0.916074	-0.0312861	0.000849025	-0.901284	0.0264473	0.869998	sp.Q96BT3.CENPT_HUMAN	0.5202	-0.150535	0.547209	-0.135915	0.960751	-0.0146201	Buffering	Scaling	Anti-Scaling	Buffering
CENPV	0.840878	0.146641	0.0254161	0.799528	0.409527	-0.652887	sp.Q7Z7K6.CENPV_HUMAN	0.824168	0.0756028	0.040368	0.460865	0.295787	-0.385262	Buffering	Anti-Scaling	Buffering	Anti-Scaling
CEP128	0.00438649	0.49025	0.0283576	-0.6631	0.00178992	1.15335	sp.Q6ZU80.CE128_HUMAN	0.614884	0.197546	0.00157359	-0.875356	0.0356241	1.0729	Scaling	Scaling	Buffering	Scaling
CEP164	0.102338	0.336175	0.611321	-0.166626	0.178721	0.502801	sp.Q9UPV0.CE164_HUMAN	0.105235	0.37527	0.232235	0.22977	0.435	0.145499	Scaling	Buffering	Scaling	Anti-Scaling
CEP170B	0.551645	0.67063	0.384695	-0.35025	0.38658	1.02088	sp.Q9Y4F5.C170B_HUMAN	0.267914	0.432792	0.531252	-0.108394	0.187437	0.541186	Scaling	Scaling	Scaling	Buffering
CEP192	0.0372482	0.434804	0.0144353	-0.781473	0.00161545	1.21628	tr.E9PF99.E9PF99_HUMAN	0.68415	0.17443	0.220079	-0.363767	0.294115	0.538196	Scaling	Scaling	Buffering	Scaling
CEP290	0.213675	0.469448	0.216601	-0.590945	0.0699894	1.06039	sp.O15078.CE290_HUMAN	0.82846	0.051987	0.187246	-0.244707	0.296414	0.296694	Scaling	Scaling	Buffering	Buffering
CEP57	0.209805	0.167838	0.00999252	-0.720551	0.0033731	0.888389	sp.Q86XR8.CEP57_HUMAN	0.142619	0.232964	0.0581083	-0.545306	0.0151983	0.77827	Buffering	Scaling	Buffering	Scaling
CEP76	0.725367	0.127702	0.0408799	-0.627048	0.110089	0.75475	sp.Q8TAP6.CEP76_HUMAN	0.859148	-0.0364409	0.185911	-0.466338	0.240742	0.429898	Buffering	Scaling	Buffering	Scaling
CEP78	0.219059	-0.228919	0.074448	-0.949559	0.14951	0.72064	sp.Q5JTW2.5.CEP78_HUMAN	0.00512843	-0.344827	1.60189e-07	-0.805261	0.00135318	0.460434	Anti-Scaling	Scaling	Anti-Scaling	Scaling
CERCAM	0.961177	-0.042132	0.0388177	1.06167	0.253342	-1.10381	sp.Q5T4B2.GT253_HUMAN	0.456956	-0.30192	0.611731	0.455785	0.430442	-0.757705	Buffering	Anti-Scaling	Anti-Scaling	Anti-Scaling
CES1	0.209673	1.99675	0.745195	0.259328	0.300102	1.73743	sp.P23141.2.EST1_HUMAN	0.129955	2.24198	0.645343	0.390726	0.229321	1.85126	Scaling	Anti-Scaling	Scaling	Anti-Scaling
CES2	0.267002	0.422506	0.0613663	-0.641932	0.0331656	1.06444	sp.O00748.EST2_HUMAN	0.634538	0.277196	0.484579	-0.426912	0.382097	0.704108	Scaling	Scaling	Scaling	Scaling
CFDP1	0.000740782	1.08597	0.592205	-0.126794	0.000916695	1.21276	sp.Q9UEE9.CFDP1_HUMAN	0.147315	0.547972	0.577038	-0.117251	0.104757	0.665223	Scaling	Buffering	Scaling	Buffering
CFL1	0.883519	-0.029947	0.209021	0.442604	0.225716	-0.472551	sp.P23528.COF1_HUMAN	0.850207	0.100795	0.689079	0.107638	0.990475	-0.00684228	Buffering	Anti-Scaling	Buffering	Anti-Scaling
CFL2	0.269595	0.678939	0.00413197	1.20367	0.405308	-0.524728	sp.Q9Y281.COF2_HUMAN	0.513029	0.450186	0.0594394	0.587085	0.844527	-0.136899	Scaling	Anti-Scaling	Scaling	Anti-Scaling
CGREF1	0.52138	0.835066	0.56402	0.655614	0.909957	0.179452	sp.Q99674.5.CGRE1_HUMAN	0.513224	0.899856	0.345883	1.71158	0.691234	-0.811728	Scaling	Anti-Scaling	Scaling	Anti-Scaling
CHAC2	0.951407	-0.032848	0.504862	-0.395727	0.629998	0.362879	sp.Q8WUX2.CHAC2_HUMAN	0.0463014	-0.82794	0.751247	0.101806	0.0538057	-0.929746	Buffering	Scaling	Anti-Scaling	Anti-Scaling
CHAF1A	0.000262907	0.524978	0.718696	-0.278549	0.352943	0.803527	sp.Q13111.CAF1A_HUMAN	0.862042	-0.0991581	0.604665	-0.436181	0.721082	0.337023	Scaling	Scaling	Buffering	Scaling
CHAMP1	0.0392146	0.692435	0.00105839	-0.651274	0.00129667	1.34371	sp.Q96JM3.CHAP1_HUMAN	0.794268	-0.0671825	0.0426846	-0.437797	0.236436	0.370614	Scaling	Scaling	Buffering	Scaling
CHCHD2	9.5267e-05	0.453341	0.572521	-0.193149	0.119179	0.64649	sp.Q9Y6H1.CHCH2_HUMAN	0.790442	-0.0493666	0.718063	0.164404	0.64834	-0.21377	Scaling	Buffering	Buffering	Anti-Scaling
CHD3	0.163802	0.513772	0.786339	-0.0883646	0.161984	0.602136	sp.Q12873.3.CHD3_HUMAN	0.0884867	-0.166581	0.31629	0.207885	0.0913391	-0.374467	Scaling	Buffering	Anti-Scaling	Anti-Scaling
CHD4	0.675801	0.107733	0.885821	0.0308309	0.807378	0.0769025	tr.F5GWX5.F5GWX5_HUMAN	0.654135	-0.0521467	0.360842	0.27067	0.29492	-0.322817	Buffering	Buffering	Buffering	Anti-Scaling
CHD8	0.111571	0.800763	0.016706	-0.748921	0.0123158	1.54968	sp.Q9HCK8.CHD8_HUMAN	0.0787694	0.578883	0.092073	-0.328536	0.01734	0.907419	Scaling	Scaling	Scaling	Scaling
CHD9	0.958912	-0.0210527	0.01222	-0.735611	0.142886	0.714558	sp.Q3L8U1.CHD9_HUMAN	0.842593	0.034323	0.0100049	-0.329701	0.0784006	0.364024	Buffering	Scaling	Buffering	Scaling
CHEK1	0.0786348	0.645927	0.0346897	-0.640618	0.00636971	1.28654	sp.O14757.CHK1_HUMAN	0.361937	0.381135	0.209465	-0.35147	0.132646	0.732604	Scaling	Scaling	Scaling	Scaling
CHERP	0.729812	0.0579141	0.60115	-0.363996	0.552674	0.421911	tr.J3QK89.J3QK89_HUMAN	0.9099	-0.0532446	0.101911	-0.279621	0.644332	0.226377	Buffering	Scaling	Buffering	Scaling
CHFR	0.860213	0.217403	0.69685	0.206652	0.993355	0.0107512	sp.Q96EP1.2.CHFR_HUMAN	0.690615	-0.167335	0.599821	0.268238	0.479482	-0.435573	Buffering	Anti-Scaling	Anti-Scaling	Anti-Scaling
CHKA	0.452755	0.230317	0.886845	0.0521446	0.69193	0.178172	sp.P35790.CHKA_HUMAN	0.66539	0.0922421	0.457555	0.118288	0.902089	-0.0260463	Buffering	Buffering	Buffering	Anti-Scaling
CHMP1A	0.647491	0.118614	0.0321127	-0.49052	0.0708144	0.609133	sp.Q9HD42.CHM1A_HUMAN	0.887717	-0.0373538	0.552825	-0.18659	0.70044	0.149236	Buffering	Scaling	Buffering	Buffering
CHMP1B	0.140777	1.17369	0.0918262	-0.621776	0.0465739	1.79547	sp.Q7LBR1.CHM1B_HUMAN	0.00899321	0.736152	0.100663	-0.459103	0.00233371	1.19526	Scaling	Scaling	Scaling	Scaling
CHMP2A	0.0128504	0.307814	0.128635	-0.837016	0.0703503	1.14483	tr.M0R1T5.M0R1T5_HUMAN	0.276332	0.171844	0.730559	-0.204882	0.544035	0.376727	Scaling	Scaling	Buffering	Buffering
CHMP3	0.107426	0.664307	0.60228	-0.335806	0.189763	1.00011	sp.Q9Y3E7.CHMP3_HUMAN	0.23426	0.131999	0.210597	0.365192	0.39454	-0.233193	Scaling	Scaling	Buffering	Anti-Scaling
CHMP4A	0.024251	0.711868	0.00226361	-0.64548	0.000822566	1.35735	sp.Q9BY43.CHM4A_HUMAN	0.236361	0.648529	0.020078	-0.988787	0.0205754	1.63732	Scaling	Scaling	Scaling	Scaling
CHMP5	0.278328	0.325982	0.70412	-0.0533532	0.228701	0.379336	sp.Q9NZZ3.CHMP5_HUMAN	0.337064	0.617205	0.228681	-0.196497	0.228884	0.813703	Scaling	Buffering	Scaling	Buffering
CHMP7	0.000841531	0.594618	0.10045	-0.393861	0.00101987	0.988479	sp.Q8WUX9.CHMP7_HUMAN	0.00589036	0.526966	0.618144	-0.113375	0.0228226	0.640341	Scaling	Scaling	Scaling	Buffering
CHORDC1	0.0895163	0.54194	0.0406406	-0.556444	0.00763654	1.09838	sp.Q9UHD1.CHRD1_HUMAN	0.420693	0.279526	0.145155	-0.521312	0.0946576	0.800838	Scaling	Scaling	Scaling	Scaling
CHST12	0.751415	-0.0955532	0.561484	-0.162798	0.856671	0.0672448	sp.Q9NRB3.CHSTC_HUMAN	0.00456825	0.898882	0.427412	-0.609685	0.117039	1.50857	Buffering	Buffering	Scaling	Scaling
CHTF18	0.549945	-0.445824	0.0862103	-0.613161	0.824958	0.167337	sp.Q8WVB6.CTF18_HUMAN	0.534223	-0.255493	0.763088	-0.052385	0.6283	-0.203108	Anti-Scaling	Scaling	Anti-Scaling	Buffering
CHTF8	0.78622	0.0613392	0.00229406	-0.51645	0.0429125	0.577789	sp.P0CG13.CTF8_HUMAN	0.176668	0.356109	0.409076	0.130291	0.360507	0.225819	Buffering	Scaling	Scaling	Anti-Scaling
CHTF8	0.78622	0.0613392	0.00229406	-0.51645	0.0429125	0.577789	sp.P0CG12.CTF8A_HUMAN	0.657899	-0.14168	0.0371479	-0.4869	0.331744	0.34522	Buffering	Scaling	Anti-Scaling	Scaling
CHURC1	0.235787	0.514567	0.239738	-0.20574	0.126357	0.720308	sp.Q8WUH1.2.CHUR_HUMAN	0.472351	0.434654	0.28838	-0.592503	0.19192	1.02716	Scaling	Buffering	Scaling	Scaling
CIAPIN1	0.579367	0.0854365	0.000189539	-0.958519	0.000235584	1.04396	sp.Q6FI81.CPIN1_HUMAN	0.743373	0.0421161	0.0100329	-0.547966	0.00638495	0.590082	Buffering	Scaling	Buffering	Scaling
CIC	0.942318	0.024176	0.837614	0.0869626	0.901799	-0.0627866	tr.I3L2J0.I3L2J0_HUMAN	0.849607	0.07065	0.214623	-0.380902	0.308596	0.451552	Buffering	Buffering	Buffering	Scaling
CIC	0.942318	0.024176	0.837614	0.0869626	0.901799	-0.0627866	sp.Q96RK0.CIC_HUMAN	0.730069	0.0981642	0.115834	-0.818291	0.0760819	0.916455	Buffering	Buffering	Buffering	Scaling
CINP	0.104253	0.393462	0.8233	-0.0460058	0.132958	0.439467	sp.Q9BW66.3.CINP_HUMAN	0.973745	-0.00971804	0.108593	-0.577304	0.196279	0.567586	Scaling	Buffering	Buffering	Scaling
CIRBP	0.0322636	0.560542	0.423548	-0.7892	0.227495	1.34974	sp.Q14011.CIRBP_HUMAN	0.794567	0.156787	0.738118	-0.29386	0.655164	0.450647	Scaling	Scaling	Buffering	Scaling
CIT	0.932188	0.0305144	0.981975	0.00762055	0.960261	0.0228938	sp.O14578.4.CTRO_HUMAN	0.335272	-0.373001	0.217518	0.250106	0.152889	-0.623107	Buffering	Buffering	Anti-Scaling	Anti-Scaling
CIZ1	0.936335	-0.0237104	0.921628	0.0156336	0.903447	-0.039344	sp.Q9ULV3.2.CIZ1_HUMAN	0.474549	-0.444966	0.847075	0.0769613	0.464589	-0.521927	Buffering	Buffering	Anti-Scaling	Buffering
CKAP2	0.00565052	0.361148	0.00826957	-0.714521	0.000490476	1.07567	sp.Q8WWK9.CKAP2_HUMAN	0.632714	0.114727	0.330845	-0.289383	0.250369	0.40411	Scaling	Scaling	Buffering	Scaling
CKAP4	0.11722	0.625354	0.731343	-0.648001	0.519599	1.27336	sp.Q07065.CKAP4_HUMAN	0.033411	0.990168	0.995023	0.0102079	0.570455	0.97996	Scaling	Scaling	Scaling	Buffering
CKB	0.840341	-0.248625	0.165349	-1.39204	0.445766	1.14342	sp.P12277.KCRB_HUMAN	0.795466	-0.262989	1.71208e-05	-1.44365	0.279197	1.18066	Anti-Scaling	Scaling	Anti-Scaling	Scaling
CKS2	0.741024	0.0908934	0.114913	-0.647397	0.109899	0.738291	sp.P33552.CKS2_HUMAN	0.142534	-0.362566	0.649934	0.309463	0.353667	-0.672028	Buffering	Scaling	Anti-Scaling	Anti-Scaling
CLASRP	0.0259273	0.528059	0.202513	0.200889	0.154469	0.32717	sp.Q8N2M8.CLASR_HUMAN	0.230047	0.117219	0.674915	0.0579725	0.688951	0.059247	Scaling	Anti-Scaling	Buffering	Buffering
CLCN7	0.968803	-0.0303203	0.122583	-0.573021	0.52488	0.5427	sp.P51798.CLCN7_HUMAN	0.690347	0.301	0.877663	0.0342458	0.727199	0.266754	Buffering	Scaling	Scaling	Buffering
CLEC16A	0.814703	-0.0820728	0.0309296	-0.659851	0.201651	0.577778	sp.Q2KHT3.CL16A_HUMAN	0.873382	0.0625357	0.551063	0.0638196	0.997413	-0.00128396	Buffering	Scaling	Buffering	Buffering
CLIC3	0.00418326	2.6928	0.349745	1.14033	0.246896	1.55247	sp.O95833.CLIC3_HUMAN	0.246234	0.653724	0.146312	1.09899	0.569061	-0.44527	Scaling	Anti-Scaling	Scaling	Anti-Scaling
CLIP1	0.163496	1.00707	0.429024	0.256871	0.28177	0.750197	sp.P30622.2.CLIP1_HUMAN	0.00151779	0.856457	0.878162	-0.132108	0.320382	0.988566	Scaling	Anti-Scaling	Scaling	Buffering
CLIP1	0.163496	1.00707	0.429024	0.256871	0.28177	0.750197	sp.P30622.1.CLIP1_HUMAN	0.0647894	0.529943	0.703033	-0.252081	0.302905	0.782024	Scaling	Anti-Scaling	Scaling	Scaling
CLIP4	0.839004	0.269532	0.779204	0.319681	0.975776	-0.050149	sp.Q8N3C7.CLIP4_HUMAN	0.071468	-0.475432	0.188176	-0.20175	0.257524	-0.273682	Scaling	Anti-Scaling	Anti-Scaling	Buffering
CLMN	0.0282569	1.57057	0.215651	-0.606513	0.00808305	2.17708	sp.Q96JQ2.CLMN_HUMAN	0.0150392	1.76565	0.62535	0.16772	0.0212512	1.59793	Scaling	Scaling	Scaling	Anti-Scaling
CLMP	0.734627	-0.281692	0.586396	0.535882	0.506128	-0.817574	sp.Q9H6B4.CLMP_HUMAN	0.894194	0.0575214	0.147585	2.70372	0.162075	-2.6462	Anti-Scaling	Anti-Scaling	Buffering	Anti-Scaling
CLN3	0.894911	-0.0573522	0.104106	-0.523386	0.373739	0.466034	sp.Q13286.CLN3_HUMAN	0.362067	0.532109	0.397572	-0.457745	0.186469	0.989854	Buffering	Scaling	Scaling	Scaling
CLN5	0.210014	0.331226	0.0376592	-0.546816	0.0151856	0.878042	sp.O75503.CLN5_HUMAN	0.92407	-0.0528212	0.358347	-0.331881	0.661262	0.27906	Scaling	Scaling	Buffering	Scaling
CLN8	0.45049	0.160846	0.131863	-0.49501	0.0765268	0.655856	sp.Q9UBY8.CLN8_HUMAN	0.390916	-0.363946	0.352249	-0.433698	0.900944	0.0697519	Buffering	Scaling	Anti-Scaling	Scaling
CLNS1A	0.0286076	0.60478	0.344772	-0.351873	0.0356629	0.956653	sp.P54105.ICLN_HUMAN	0.346195	0.478491	0.901335	0.0538017	0.503225	0.424689	Scaling	Scaling	Scaling	Buffering
CLP1	0.0611307	0.344166	0.191444	0.170138	0.359253	0.174028	sp.Q92989.CLP1_HUMAN	0.729652	0.0438303	0.036722	-0.286644	0.0563744	0.330475	Scaling	Anti-Scaling	Buffering	Scaling
CLPB	0.0387198	0.258306	0.496771	-0.315166	0.235317	0.573472	sp.Q9H078.2.CLPB_HUMAN	0.991791	-0.00275504	0.588973	-0.127948	0.710589	0.125193	Scaling	Scaling	Buffering	Buffering
CLPP	0.03482	0.473937	0.114195	-0.703739	0.032819	1.17768	sp.Q16740.CLPP_HUMAN	0.6415	0.240449	0.35485	-0.212956	0.419448	0.453405	Scaling	Scaling	Buffering	Buffering
CLPTM1	0.217124	0.607898	0.841285	-0.0583376	0.22199	0.666235	sp.O96005.CLPT1_HUMAN	0.0380574	0.633814	0.434672	-0.524607	0.151314	1.15842	Scaling	Buffering	Scaling	Scaling
CLSTN3	0.955889	0.0237603	0.419503	-0.677399	0.425768	0.70116	sp.Q9BQT9.2.CSTN3_HUMAN	0.374562	-0.417651	0.575997	0.182452	0.249397	-0.600103	Buffering	Scaling	Anti-Scaling	Anti-Scaling
CLTA	0.469819	0.243566	0.107803	-0.231745	0.208043	0.475311	sp.P09496.2.CLCA_HUMAN	0.787998	-0.12678	0.165416	-0.240432	0.815584	0.113653	Buffering	Buffering	Anti-Scaling	Buffering
CLU	0.57606	-0.50065	0.181224	1.38705	0.139363	-1.8877	sp.P10909.2.CLUS_HUMAN	0.717698	-0.242385	0.150919	0.697776	0.230967	-0.940161	Anti-Scaling	Anti-Scaling	Anti-Scaling	Anti-Scaling
CLUH	0.406698	-0.251514	0.0649263	-0.541565	0.432369	0.290051	sp.O75153.CLU_HUMAN	0.031419	0.353104	0.989916	0.00237885	0.0995442	0.350725	Anti-Scaling	Scaling	Scaling	Buffering
CLUH	0.406698	-0.251514	0.0649263	-0.541565	0.432369	0.290051	tr.I3L2B0.I3L2B0_HUMAN	0.183278	0.374656	0.784712	0.0503665	0.249164	0.324289	Anti-Scaling	Scaling	Scaling	Buffering
CLYBL	0.0818645	0.738701	0.210477	-0.319891	0.025442	1.05859	sp.Q8N0X4.CLYBL_HUMAN	0.450659	0.417808	0.101727	-0.572421	0.115962	0.990229	Scaling	Scaling	Scaling	Scaling
CMAS	0.000508039	0.769199	0.308167	-0.355934	0.0255641	1.12513	sp.Q8NFW8.NEUA_HUMAN	0.0645106	0.425825	0.663992	-0.194904	0.240215	0.620729	Scaling	Scaling	Scaling	Buffering
CMC2	0.426935	0.244381	0.379869	-0.256235	0.219877	0.500616	sp.Q9NRP2.COXM2_HUMAN	0.371022	0.156387	0.0207445	-0.516544	0.0121	0.672931	Buffering	Scaling	Buffering	Scaling
CMIP	0.00234317	1.2664	0.3831	-0.278129	0.00152667	1.54453	sp.Q8IY22.CMIP_HUMAN	0.00131757	0.89712	0.864292	0.0903547	0.173694	0.806765	Scaling	Scaling	Scaling	Buffering
CMPK2	0.0368563	-1.11813	0.00274114	-1.20664	0.835147	0.0885091	sp.Q5EBM0.CMPK2_HUMAN	0.182854	-0.831414	0.126723	-1.19096	0.648791	0.359548	Anti-Scaling	Scaling	Anti-Scaling	Scaling
CMTM3	0.663419	0.279104	0.528705	0.389725	0.890442	-0.110621	sp.Q96MX0.CKLF3_HUMAN	0.794199	0.201131	0.913534	-0.0380127	0.765165	0.239144	Scaling	Anti-Scaling	Buffering	Buffering
CMTM5	0.0206185	-0.188698	0.476523	0.539733	0.343177	-0.728431	sp.Q96DZ9.CKLF5_HUMAN	0.653294	-0.591517	0.850009	0.087522	0.604154	-0.679039	Anti-Scaling	Anti-Scaling	Anti-Scaling	Buffering
CMTR2	0.915776	0.0436895	0.141337	-0.390184	0.362814	0.433873	sp.Q8IYT2.CMTR2_HUMAN	0.0679528	0.297806	0.604088	0.0796773	0.221141	0.218128	Buffering	Scaling	Scaling	Buffering
CNN2	0.0344953	0.723468	0.850669	0.135354	0.449775	0.588113	sp.Q99439.CNN2_HUMAN	0.196319	1.13721	0.401316	0.333316	0.320852	0.803889	Scaling	Anti-Scaling	Scaling	Anti-Scaling
CNOT1	0.833038	0.0284759	0.000911427	-0.613426	0.00267516	0.641902	sp.A5YKK6.CNOT1_HUMAN	0.905923	-0.0164843	0.365702	0.145319	0.410351	-0.161803	Buffering	Scaling	Buffering	Anti-Scaling
CNOT2	0.063031	0.389233	0.493361	0.871121	0.6919	-0.481888	sp.Q9NZN8.CNOT2_HUMAN	0.674271	0.0595536	0.467027	-0.249685	0.391466	0.309239	Scaling	Anti-Scaling	Buffering	Buffering
CNOT3	0.504547	0.168411	0.985464	0.0127645	0.831282	0.155646	sp.O75175.CNOT3_HUMAN	0.287779	0.163896	0.57709	0.180611	0.959464	-0.0167151	Buffering	Buffering	Buffering	Anti-Scaling
CNOT7	0.0218617	0.357473	0.00053574	-0.763755	2.07834e-05	1.12123	sp.Q9UIV1.CNOT7_HUMAN	0.474019	-0.115903	0.358875	-0.141449	0.902622	0.0255458	Scaling	Scaling	Anti-Scaling	Buffering
CNPY2	0.170748	0.703996	0.971626	0.0103164	0.20107	0.69368	sp.Q9Y2B0.CNPY2_HUMAN	0.0859547	1.04675	0.691517	0.182729	0.195303	0.864019	Scaling	Buffering	Scaling	Anti-Scaling
CNRIP1	0.316029	-0.724057	0.830004	0.295034	0.498371	-1.01909	sp.Q96F85.CNRP1_HUMAN	0.449556	-0.427382	0.900072	0.191306	0.696343	-0.618687	Anti-Scaling	Anti-Scaling	Anti-Scaling	Anti-Scaling
CNTLN	0.170844	-1.21649	0.141548	-0.275083	0.261359	-0.941403	sp.Q9NXG0.2.CNTLN_HUMAN	0.711259	-0.0968827	0.734419	0.056534	0.568435	-0.153417	Anti-Scaling	Scaling	Buffering	Buffering
CNTRL	0.786288	0.0738745	0.192061	-0.553019	0.178605	0.626893	sp.Q7Z7A1.CNTRL_HUMAN	0.659798	-0.183676	0.657093	0.238711	0.517426	-0.422387	Buffering	Scaling	Anti-Scaling	Anti-Scaling
COA1	0.00016719	0.493934	0.167742	-0.57717	0.0380404	1.0711	sp.Q9GZY4.COA1_HUMAN	5.04402e-06	0.528441	0.303683	-0.443365	0.0688456	0.971805	Scaling	Scaling	Scaling	Scaling
COA4	0.0110885	0.658303	0.484497	-0.226331	0.0285528	0.884633	sp.Q9NYJ1.2.COA4_HUMAN	0.379208	0.977249	0.346673	-0.544063	0.218448	1.52131	Scaling	Buffering	Scaling	Scaling
COBL	0.145735	0.6172	0.0980358	-1.04844	0.0220147	1.66564	sp.O75128.2.COBL_HUMAN	0.949976	-0.0258154	0.00105598	-1.00269	0.0240879	0.97687	Scaling	Scaling	Buffering	Scaling
COG3	0.768968	0.0711459	0.0555996	-0.361689	0.148115	0.432835	sp.Q96JB2.COG3_HUMAN	0.285787	0.255431	0.0128478	-0.321602	0.0373856	0.577033	Buffering	Scaling	Scaling	Scaling
COG4	0.908338	0.0544543	0.039401	-0.475119	0.311006	0.529574	sp.Q9H9E3.COG4_HUMAN	0.393261	0.163382	0.315402	-0.163201	0.166939	0.326584	Buffering	Scaling	Buffering	Buffering
COG6	0.631285	-0.0954522	0.00828991	-0.509066	0.0989061	0.413614	sp.Q9Y2V7.COG6_HUMAN	0.0801144	0.412172	0.0388144	-0.242877	0.0143055	0.655048	Buffering	Scaling	Scaling	Buffering
COG7	0.562675	0.0531755	0.151509	-0.42418	0.113726	0.477356	sp.P83436.COG7_HUMAN	0.623764	0.131166	0.270679	-0.135394	0.364055	0.26656	Buffering	Scaling	Buffering	Buffering
COG8	0.114891	0.385729	0.0043435	-0.601117	0.00282453	0.986845	sp.Q96MW5.COG8_HUMAN	0.383312	0.154966	0.0918769	-0.216762	0.0798319	0.371728	Scaling	Scaling	Buffering	Buffering
COL12A1	0.0388297	-1.83628	0.21822	-1.06873	0.418675	-0.767544	sp.Q99715.COCA1_HUMAN	3.79899e-05	-0.957212	0.93161	-0.0370263	0.0521801	-0.920186	Anti-Scaling	Scaling	Anti-Scaling	Buffering
COL4A1	0.176143	-1.51688	0.420708	-0.768851	0.570479	-0.748031	sp.P02462.CO4A1_HUMAN	0.314078	-0.751367	0.266698	-1.47911	0.610073	0.727741	Anti-Scaling	Scaling	Anti-Scaling	Scaling
COL4A2	0.352137	-1.20049	0.558527	-0.533627	0.646563	-0.666859	sp.P08572.CO4A2_HUMAN	0.224622	-0.720118	0.191997	-1.34184	0.570792	0.621722	Anti-Scaling	Scaling	Anti-Scaling	Scaling
COL5A1	0.644362	0.491634	0.289438	-0.736717	0.31233	1.22835	sp.P20908.CO5A1_HUMAN	0.242448	0.386409	0.215806	-0.460842	0.0586347	0.847252	Scaling	Scaling	Scaling	Scaling
COLEC12	0.0105904	-0.552545	0.000209555	-0.595872	0.767607	0.0433273	sp.Q5KU26.COL12_HUMAN	0.0238497	-0.886124	0.025809	-0.9123	0.939107	0.0261759	Anti-Scaling	Scaling	Anti-Scaling	Scaling
COLGALT1	0.998179	0.00182262	0.926735	-0.0621513	0.948197	0.0639739	sp.Q8NBJ5.GT251_HUMAN	0.872879	-0.151879	0.765995	-0.122947	0.976775	-0.0289317	Buffering	Buffering	Anti-Scaling	Buffering
COMMD1	0.26421	0.427682	0.506709	-0.129142	0.181227	0.556824	sp.Q8N668.COMD1_HUMAN	0.717801	-0.103817	0.408061	0.0814713	0.529562	-0.185288	Scaling	Buffering	Anti-Scaling	Buffering
COMMD3	0.0232644	0.796808	0.000237548	-0.603867	0.00174186	1.40068	sp.Q9UBI1.COMD3_HUMAN	0.883699	-0.042634	0.150158	-0.181256	0.647324	0.138622	Scaling	Scaling	Buffering	Buffering
COMMD6	0.00562568	0.575849	0.663459	-0.127228	0.0411355	0.703076	sp.Q7Z4G1.COMD6_HUMAN	0.655797	0.11872	0.475958	0.122047	0.990873	-0.00332684	Scaling	Buffering	Buffering	Anti-Scaling
COPE	0.108155	0.559395	0.482906	-0.443986	0.183803	1.00338	sp.O14579.COPE_HUMAN	0.620917	-0.0560511	0.362437	0.267059	0.292189	-0.32311	Scaling	Scaling	Buffering	Anti-Scaling
COPS3	0.0853309	0.394842	0.00243709	-0.530212	0.00262694	0.925054	sp.Q9UNS2.CSN3_HUMAN	0.895233	0.0246007	0.706307	0.0682544	0.856406	-0.0436537	Scaling	Scaling	Buffering	Buffering
COPS7A	0.0123618	0.429151	4.21331e-14	-0.71238	3.65391e-06	1.14153	sp.Q9UBW8.CSN7A_HUMAN	0.732559	-0.066629	0.171959	-0.380382	0.270332	0.313753	Scaling	Scaling	Buffering	Scaling
COPZ1	0.00668547	0.773792	0.480641	0.433699	0.573947	0.340093	sp.P61923.COPZ1_HUMAN	0.70368	-0.112299	0.622655	0.0933177	0.535463	-0.205616	Scaling	Anti-Scaling	Anti-Scaling	Buffering
COQ3	0.916222	0.0586718	0.104438	-0.629858	0.309429	0.68853	sp.Q9NZJ6.COQ3_HUMAN	0.18412	0.352524	0.072944	-0.556141	0.0201856	0.908665	Buffering	Scaling	Scaling	Scaling
COQ5	0.0552587	0.488416	0.197064	-0.33537	0.0228461	0.823786	sp.Q5HYK3.COQ5_HUMAN	0.14633	0.872938	0.0956814	-0.763443	0.0289175	1.63638	Scaling	Scaling	Scaling	Scaling
COQ6	0.0605129	0.662009	0.154557	-0.375296	0.0144661	1.03731	sp.Q9Y2Z9.COQ6_HUMAN	0.18195	0.429402	0.0561857	-0.51576	0.0228525	0.945163	Scaling	Scaling	Scaling	Scaling
COQ7	0.0189913	0.564277	0.00169665	-0.881067	0.000102243	1.44534	sp.Q99807.COQ7_HUMAN	0.179512	0.917468	0.00434019	-0.82511	0.0437825	1.74258	Scaling	Scaling	Scaling	Scaling
COQ9	0.747827	0.0751145	0.00086761	-0.963337	0.00377994	1.03845	sp.O75208.COQ9_HUMAN	0.145761	0.39888	0.0474662	-0.606894	0.0113688	1.00577	Buffering	Scaling	Scaling	Scaling
CORO1A	0.555604	-0.678089	0.303084	1.05258	0.236915	-1.73067	sp.P31146.COR1A_HUMAN	0.221204	-0.750649	0.279173	0.848886	0.0858626	-1.59953	Anti-Scaling	Anti-Scaling	Anti-Scaling	Anti-Scaling
CORO1B	0.528791	-0.471507	0.0097705	0.721489	0.150673	-1.193	sp.Q9BR76.COR1B_HUMAN	0.891228	-0.0440388	0.0185427	0.514982	0.140667	-0.55902	Anti-Scaling	Anti-Scaling	Buffering	Anti-Scaling
CORO1C	0.391977	-0.280866	0.625802	-0.246173	0.948624	-0.0346935	sp.Q9ULV4.3.COR1C_HUMAN	0.885709	-0.0408398	0.377077	-0.326987	0.496018	0.286147	Anti-Scaling	Buffering	Buffering	Scaling
CORO2A	0.227493	1.08451	0.869493	0.0904156	0.313637	0.994093	sp.Q92828.COR2A_HUMAN	0.0847027	1.03283	0.176287	0.275482	0.18347	0.757352	Scaling	Buffering	Scaling	Anti-Scaling
CORO7	0.410945	-0.633572	0.5941	-0.208151	0.587106	-0.425421	sp.P57737.3.CORO7_HUMAN	0.387963	-0.222424	0.80377	0.088923	0.444108	-0.311347	Anti-Scaling	Buffering	Anti-Scaling	Buffering
COTL1	0.954153	-0.031444	0.20144	-0.860142	0.296553	0.828698	sp.Q14019.COTL1_HUMAN	0.106943	-0.579318	0.0963062	-0.839585	0.621772	0.260267	Buffering	Scaling	Anti-Scaling	Scaling
COX16	0.81724	0.140516	0.825154	0.0457803	0.880357	0.0947362	sp.Q9P0S2.COX16_HUMAN	0.738146	0.191688	0.144013	-0.358906	0.386553	0.550594	Buffering	Buffering	Buffering	Scaling
COX19	0.000950241	0.431077	0.0182058	-0.698033	0.00157553	1.12911	sp.Q49B96.COX19_HUMAN	0.769306	0.0487931	0.0105426	-0.772667	0.00558366	0.821461	Scaling	Scaling	Buffering	Scaling
COX4I1	0.114197	-0.203084	0.270617	-0.273167	0.784844	0.070083	sp.P13073.COX41_HUMAN	0.471341	0.0870704	0.0363682	-0.222616	0.0381738	0.309686	Anti-Scaling	Scaling	Buffering	Buffering
COX6B1	5.24813e-05	0.73457	0.372553	0.22134	0.100796	0.51323	sp.P14854.CX6B1_HUMAN	0.0574698	0.617248	0.688973	-0.267303	0.259807	0.884552	Scaling	Anti-Scaling	Scaling	Scaling
COX7A2	0.460643	0.393003	0.404499	-0.178617	0.318923	0.57162	sp.P14406.CX7A2_HUMAN	0.0374272	0.813288	0.0024995	-0.448213	0.00840965	1.2615	Scaling	Buffering	Scaling	Scaling
COX7A2L	0.175137	0.271311	0.802135	0.0598398	0.45768	0.211471	sp.O14548.COX7R_HUMAN	0.689146	0.195124	0.411666	-0.150825	0.49995	0.345949	Scaling	Buffering	Buffering	Buffering
CPM	0.6105	0.526598	0.13348	2.53307	0.216972	-2.00647	sp.P14384.CBPM_HUMAN	0.766969	0.283219	3.02629e-07	1.94226	0.148819	-1.65904	Scaling	Anti-Scaling	Scaling	Anti-Scaling
CPNE2	0.676736	-0.229967	0.2724	-0.572287	0.624584	0.34232	sp.Q96FN4.CPNE2_HUMAN	0.650374	-0.172618	0.0288615	-0.568892	0.351027	0.396274	Anti-Scaling	Scaling	Anti-Scaling	Scaling
CPNE7	0.433378	-0.909119	0.906445	-0.0892559	0.53197	-0.819863	sp.Q9UBL6.CPNE7_HUMAN	0.0528298	-0.839707	0.61905	0.282838	0.102062	-1.12255	Anti-Scaling	Buffering	Anti-Scaling	Anti-Scaling
CPNE8	0.992112	-0.0101582	0.0679252	1.79634	0.161116	-1.8065	sp.Q86YQ8.CPNE8_HUMAN	0.520509	-0.459315	3.92161e-10	1.6254	0.0427409	-2.08472	Buffering	Anti-Scaling	Anti-Scaling	Anti-Scaling
CPPED1	0.025407	2.1637	0.755271	0.221422	0.0363343	1.94228	sp.Q9BRF8.CPPED_HUMAN	0.111592	1.95691	0.680926	-0.208446	0.0696644	2.16536	Scaling	Anti-Scaling	Scaling	Buffering
CPSF2	0.00735119	0.976447	0.0668309	-0.528162	0.000733913	1.50461	sp.Q9P2I0.CPSF2_HUMAN	0.676985	-0.0541021	0.0169736	-0.432526	0.0560448	0.378424	Scaling	Scaling	Buffering	Scaling
CPSF3	0.480391	0.180932	0.000783043	-0.507676	0.0478399	0.688608	sp.Q9UKF6.CPSF3_HUMAN	0.0162686	0.31135	0.0803989	-0.351737	0.010142	0.663088	Buffering	Scaling	Scaling	Scaling
CPSF6	0.236107	-0.289014	0.682822	-0.0687788	0.402396	-0.220235	sp.Q16630.2.CPSF6_HUMAN	0.506905	0.215314	0.286619	-0.305223	0.20345	0.520537	Anti-Scaling	Buffering	Buffering	Scaling
CPSF7	0.902923	0.0215011	0.469771	0.10199	0.695917	-0.0804886	sp.Q8N684.3.CPSF7_HUMAN	0.715706	0.0722531	0.632507	-0.0867867	0.530179	0.15904	Buffering	Anti-Scaling	Buffering	Buffering
CPT1A	0.535964	-0.431598	0.528874	-0.303117	0.871808	-0.128481	sp.P50416.CPT1A_HUMAN	0.673415	-0.233534	0.85125	-0.0709156	0.798854	-0.162618	Anti-Scaling	Scaling	Anti-Scaling	Buffering
CPVL	0.69602	-0.177421	0.662934	0.818068	0.601238	-0.995489	sp.Q9H3G5.CPVL_HUMAN	0.757799	-0.150875	0.700888	-0.529092	0.788951	0.378217	Anti-Scaling	Anti-Scaling	Anti-Scaling	Scaling
CRAT	0.815272	0.266154	0.241238	0.448769	0.875178	-0.182615	sp.P43155.CACP_HUMAN	0.976246	0.0201501	0.8479	-0.0726723	0.900221	0.0928224	Scaling	Anti-Scaling	Buffering	Buffering
CREB5	0.88578	0.0467312	0.0367999	-0.950192	0.0334692	0.996923	sp.Q02930.CREB5_HUMAN	0.094339	-0.398848	0.514671	0.343771	0.217652	-0.742619	Buffering	Scaling	Anti-Scaling	Anti-Scaling
CREBBP	0.127886	-0.49724	0.0576474	-0.905518	0.387157	0.408278	sp.Q92793.CBP_HUMAN	0.343208	-0.11222	0.120017	-0.271385	0.383132	0.159166	Anti-Scaling	Scaling	Anti-Scaling	Scaling
CREBZF	0.20696	0.257269	0.168718	-0.469706	0.0606117	0.726975	sp.Q9NS37.ZHANG_HUMAN	0.787103	0.187621	0.62137	-0.206555	0.610862	0.394176	Scaling	Scaling	Buffering	Buffering
CRIM1	0.685227	0.606306	0.782282	0.476676	0.952029	0.12963	sp.Q9NZV1.CRIM1_HUMAN	0.68374	-0.271125	0.787594	0.349847	0.661166	-0.620972	Scaling	Anti-Scaling	Anti-Scaling	Anti-Scaling
CRIP1	0.542272	1.13548	0.416326	-0.923959	0.332418	2.05944	sp.P50238.CRIP1_HUMAN	0.576639	0.43302	0.107063	-1.07466	0.122377	1.50768	Scaling	Scaling	Scaling	Scaling
CRIP2	0.625086	-0.498498	0.0254777	1.50203	0.0985348	-2.00053	sp.P52943.CRIP2_HUMAN	0.289185	-0.349711	0.267549	0.380601	0.0856118	-0.730312	Anti-Scaling	Anti-Scaling	Anti-Scaling	Anti-Scaling
CRIPT	0.211774	0.158006	0.27519	-0.340635	0.144034	0.498641	sp.Q9P021.CRIPT_HUMAN	0.654608	-0.192421	0.59462	0.244142	0.456748	-0.436564	Buffering	Scaling	Anti-Scaling	Anti-Scaling
CRK	0.447966	0.392078	0.00439846	-1.01896	0.0486222	1.41104	sp.P46108.CRK_HUMAN	0.568277	0.253294	0.165998	-0.524506	0.175428	0.777801	Scaling	Scaling	Scaling	Scaling
CRNKL1	0.00159793	0.457936	0.215931	-0.223974	0.00301123	0.68191	sp.Q9BZJ0.CRNL1_HUMAN	0.00158594	0.531644	0.33623	-0.127644	0.000925477	0.659288	Scaling	Buffering	Scaling	Buffering
CRTC1	0.186285	0.173796	0.526706	-0.298792	0.350508	0.472588	sp.Q6UUV9.CRTC1_HUMAN	0.914272	-0.124139	0.887288	-0.0634581	0.959576	-0.0606813	Buffering	Scaling	Anti-Scaling	Buffering
CRYAB	0.167886	-0.916847	0.792543	-0.202042	0.428821	-0.714805	sp.P02511.CRYAB_HUMAN	0.037118	-0.640401	0.426751	-0.537932	0.874809	-0.102469	Anti-Scaling	Buffering	Anti-Scaling	Scaling
CRYL1	0.836209	-0.168189	0.811965	0.130423	0.752052	-0.298612	sp.Q9Y2S2.2.CRYL1_HUMAN	0.37001	0.487731	0.850419	-0.0860444	0.393827	0.573775	Anti-Scaling	Anti-Scaling	Scaling	Buffering
CS	0.283339	0.561512	0.60326	-0.141347	0.216259	0.702859	sp.O75390.CISY_HUMAN	0.00526065	0.802746	0.827062	-0.0518902	0.0298285	0.854636	Scaling	Buffering	Scaling	Buffering
CSNK2A1	0.27735	0.172166	0.00739996	-0.639234	0.00299251	0.8114	sp.P68400.CSK21_HUMAN	0.00232188	0.396582	0.118516	-0.195882	0.000626471	0.592464	Buffering	Scaling	Scaling	Buffering
CSNK2A2	0.00536695	0.326734	0.102982	-0.848687	0.035567	1.17542	sp.P19784.CSK22_HUMAN	0.000357356	0.581732	0.228448	-0.412259	0.0145614	0.993991	Scaling	Scaling	Scaling	Scaling
CSRP2	0.536829	0.615184	0.382624	-1.2392	0.257233	1.85439	sp.Q16527.CSRP2_HUMAN	0.851171	0.117629	0.711003	-0.554165	0.667475	0.671794	Scaling	Scaling	Buffering	Scaling
CST3	0.0162642	1.27565	0.0350945	0.755332	0.296558	0.520315	sp.P01034.CYTC_HUMAN	0.0661978	0.692812	0.272315	0.323645	0.368364	0.369167	Scaling	Anti-Scaling	Scaling	Anti-Scaling
CST4	0.305573	0.431966	0.29831	0.0687679	0.388914	0.363198	sp.P01036.CYTS_HUMAN	0.13899	2.60851	0.327232	1.21966	0.437461	1.38885	Scaling	Buffering	Scaling	Anti-Scaling
CST6	0.329122	1.64133	0.415679	1.07701	0.777685	0.564324	sp.Q15828.CYTM_HUMAN	0.216686	2.47308	0.151487	1.80477	0.744157	0.668308	Scaling	Anti-Scaling	Scaling	Anti-Scaling
CST7	0.486992	0.660153	0.595127	0.361188	0.787357	0.298965	sp.O76096.CYTF_HUMAN	0.175184	1.23501	0.360241	1.00158	0.843136	0.233433	Scaling	Anti-Scaling	Scaling	Anti-Scaling
CTCF	0.507241	-0.146097	0.0876753	-0.48074	0.302794	0.334643	sp.P49711.CTCF_HUMAN	0.91374	-0.0138198	0.353647	-0.196768	0.424292	0.182948	Anti-Scaling	Scaling	Buffering	Buffering
CTGF	0.69964	1.03071	0.376832	-0.848644	0.508702	1.87936	sp.P29279.CTGF_HUMAN	0.965565	0.0474806	0.613684	0.233108	0.871333	-0.185628	Scaling	Scaling	Buffering	Anti-Scaling
CTNNA2	0.566251	0.46186	0.4677	0.568684	0.917629	-0.106825	sp.P26232.5.CTNA2_HUMAN	0.85451	0.140824	0.550473	0.388837	0.793273	-0.248013	Scaling	Anti-Scaling	Buffering	Anti-Scaling
CTNNAL1	0.10507	0.835508	0.0198436	-0.44993	0.0268088	1.28544	sp.Q9UBT7.CTNL1_HUMAN	0.134097	0.789577	0.469622	-0.243873	0.0793695	1.03345	Scaling	Scaling	Scaling	Buffering
CTNND1	0.791364	-0.309933	0.439204	0.515181	0.530754	-0.825114	sp.O60716.4.CTND1_HUMAN	0.672827	0.334263	0.405963	0.382419	0.955966	-0.0481559	Anti-Scaling	Anti-Scaling	Scaling	Anti-Scaling
CTNND1	0.791364	-0.309933	0.439204	0.515181	0.530754	-0.825114	sp.O60716.3.CTND1_HUMAN	0.680203	0.465401	0.370928	0.505665	0.973357	-0.0402642	Anti-Scaling	Anti-Scaling	Scaling	Anti-Scaling
CTSB	0.897303	-0.0622469	0.955984	0.0315984	0.89246	-0.0938453	sp.P07858.CATB_HUMAN	0.0803199	-0.518522	0.969796	0.0118645	0.180779	-0.530386	Buffering	Buffering	Anti-Scaling	Buffering
CTSC	0.00796215	1.36627	0.504653	-0.671829	0.0717052	2.0381	sp.P53634.CATC_HUMAN	0.0196618	1.06894	0.99102	-0.00641267	0.114082	1.07535	Scaling	Scaling	Scaling	Buffering
CTSF	0.199988	-1.24428	0.738617	0.261156	0.197748	-1.50543	sp.Q9UBX1.CATF_HUMAN	0.24172	-0.608734	0.687405	-0.225703	0.56775	-0.383031	Anti-Scaling	Anti-Scaling	Anti-Scaling	Buffering
CTSL	0.651666	0.62547	0.00172078	2.04728	0.328181	-1.42181	sp.P07711.CATL1_HUMAN	0.198432	0.744419	0.155732	0.624884	0.849046	0.119535	Scaling	Anti-Scaling	Scaling	Anti-Scaling
CTSV	0.0919202	1.51357	0.461172	0.695665	0.480371	0.817902	sp.O60911.CATL2_HUMAN	0.319504	0.435447	0.484471	0.377642	0.926477	0.0578045	Scaling	Anti-Scaling	Scaling	Anti-Scaling
CTTN	0.868916	-0.179901	0.0407744	1.83544	0.137677	-2.01534	sp.Q14247.SRC8_HUMAN	0.910007	0.0551807	0.0576461	1.10148	0.136289	-1.0463	Anti-Scaling	Anti-Scaling	Buffering	Anti-Scaling
CTU2	0.975704	-0.00740886	0.177484	-0.244873	0.411521	0.237464	sp.Q2VPK5.CTU2_HUMAN	0.826702	0.0631999	0.685651	0.0890481	0.939925	-0.0258483	Buffering	Buffering	Buffering	Buffering
CUL2	0.447838	0.154582	0.00011035	-0.500178	0.01522	0.65476	sp.Q13617.2.CUL2_HUMAN	0.733686	0.110572	0.00421161	-0.364218	0.188437	0.474791	Buffering	Scaling	Buffering	Scaling
CUL4A	0.182311	0.317194	0.00578664	-0.599419	0.00445745	0.916613	sp.Q13619.CUL4A_HUMAN	0.256918	0.537474	0.0333878	-0.465444	0.0614904	1.00292	Scaling	Scaling	Scaling	Scaling
CUL5	0.642147	-0.0743484	0.00527335	-0.630444	0.0238193	0.556096	sp.Q93034.CUL5_HUMAN	0.519381	0.0878804	0.00897838	-0.546014	0.00637122	0.633894	Buffering	Scaling	Buffering	Scaling
CWC15	0.0191536	0.393004	0.0228037	-0.387483	0.000908526	0.780487	sp.Q9P013.CWC15_HUMAN	0.590698	0.155533	0.0701801	-0.406326	0.108752	0.561859	Scaling	Scaling	Buffering	Scaling
CWF19L2	0.0199419	0.606216	0.0181197	-0.531739	0.000835688	1.13796	sp.Q2TBE0.C19L2_HUMAN	0.00873416	0.507307	0.0441909	-0.508036	0.00149378	1.01534	Scaling	Scaling	Scaling	Scaling
CYB5B	0.229097	0.341877	0.0810649	-0.758487	0.0293267	1.10036	sp.O43169.CYB5B_HUMAN	0.00391452	0.407898	0.0429342	-0.617825	0.00366589	1.02572	Scaling	Scaling	Scaling	Scaling
CYB5R4	0.342535	-0.643448	0.031902	-0.594654	0.937261	-0.0487941	sp.Q7L1T6.NB5R4_HUMAN	0.340736	-0.15302	0.193904	-0.391075	0.417175	0.238055	Anti-Scaling	Scaling	Anti-Scaling	Scaling
CYBA	0.188348	0.70666	0.382557	0.576336	0.850831	0.130324	sp.P13498.CY24A_HUMAN	0.710356	0.0948959	0.695504	-0.20201	0.577839	0.296906	Scaling	Anti-Scaling	Buffering	Buffering
CYCS	0.00573971	0.525099	0.0333353	-0.936834	0.0041444	1.46193	sp.P99999.CYC_HUMAN	0.0591501	0.275814	0.153465	-0.61351	0.0633074	0.889324	Scaling	Scaling	Scaling	Scaling
CYLD	0.372622	0.522947	0.537912	-0.279843	0.262727	0.802789	sp.Q9NQC7.CYLD_HUMAN	0.548518	0.2789	0.226878	0.286151	0.98813	-0.00725186	Scaling	Scaling	Scaling	Anti-Scaling
CYP1B1	0.782323	-0.242205	0.924803	0.136371	0.81498	-0.378576	sp.Q16678.CP1B1_HUMAN	0.614603	0.151774	0.309265	0.605541	0.446832	-0.453766	Anti-Scaling	Anti-Scaling	Buffering	Anti-Scaling
CYP2S1	0.808127	0.233877	4.30779e-13	-1.75591	0.0769229	1.98979	sp.Q96SQ9.2.CP2S1_HUMAN	0.583615	0.520566	0.19963	-0.701828	0.244354	1.22239	Buffering	Scaling	Scaling	Scaling
CYTH2	0.219437	0.34832	0.209186	-0.716888	0.0908072	1.06521	sp.Q99418.CYH2_HUMAN	0.869215	0.0345399	0.470763	0.470359	0.506445	-0.435819	Scaling	Scaling	Buffering	Anti-Scaling
CYTH3	0.0608719	0.643593	0.976765	-0.0190769	0.367632	0.66267	sp.O43739.CYH3_HUMAN	0.0396285	0.581504	0.865681	0.0957983	0.438157	0.485706	Scaling	Buffering	Scaling	Buffering
DAAM1	0.100308	1.1856	0.0956243	-0.711337	0.0236017	1.89693	sp.Q9Y4D1.DAAM1_HUMAN	0.692219	0.170002	0.552341	0.201387	0.951868	-0.0313846	Scaling	Scaling	Buffering	Anti-Scaling
DAB2IP	0.0608132	1.45732	0.710887	-0.308661	0.106869	1.76598	sp.Q5VWQ8.DAB2P_HUMAN	0.160964	0.465238	0.739239	0.0905612	0.330821	0.374677	Scaling	Scaling	Scaling	Buffering
DACH1	0.213624	1.1236	0.978237	0.00998612	0.233639	1.11361	sp.Q9UI36.DACH1_HUMAN	0.261352	1.27872	0.836958	-0.0788708	0.243626	1.35759	Scaling	Buffering	Scaling	Buffering
DAD1	0.52193	0.208759	0.807071	0.0333553	0.603398	0.175403	sp.P61803.DAD1_HUMAN	0.505531	0.239244	0.00375674	0.244109	0.988777	-0.00486514	Buffering	Buffering	Buffering	Anti-Scaling
DAGLB	0.0702118	0.359132	0.87278	-0.0757326	0.394909	0.434864	sp.Q8NCG7.DGLB_HUMAN	0.258289	0.239939	0.527	-0.20477	0.226802	0.444709	Scaling	Buffering	Buffering	Buffering
DAPK1	0.958194	0.0650558	0.00952793	1.75893	0.218205	-1.69387	sp.P53355.3.DAPK1_HUMAN	0.382674	0.574989	0.264352	0.434292	0.841263	0.140697	Buffering	Anti-Scaling	Scaling	Anti-Scaling
DAPK3	0.0133371	-0.369161	0.542952	-0.446713	0.911365	0.0775519	sp.O43293.DAPK3_HUMAN	0.368245	-0.417739	0.512913	-0.338849	0.895173	-0.0788902	Anti-Scaling	Scaling	Anti-Scaling	Scaling
DAZAP1	0.00194069	0.449486	0.224645	-0.433597	0.065391	0.883082	sp.Q96EP5.DAZP1_HUMAN	0.975057	-0.0371182	0.0688238	-0.192841	0.895876	0.155723	Scaling	Scaling	Buffering	Buffering
DBNL	4.56769e-05	0.767888	0.303077	-0.474998	0.0390009	1.24289	sp.Q9UJU6.DBNL_HUMAN	0.29429	0.282197	0.270726	0.316129	0.914418	-0.0339328	Scaling	Scaling	Scaling	Anti-Scaling
DBNL	4.56769e-05	0.767888	0.303077	-0.474998	0.0390009	1.24289	sp.Q9UJU6.3.DBNL_HUMAN	0.280632	0.252139	0.138494	0.356408	0.700455	-0.104269	Scaling	Scaling	Scaling	Anti-Scaling
DCAF10	0.0481329	0.532193	0.0582289	-0.281588	0.00799152	0.81378	sp.Q5QP82.DCA10_HUMAN	0.58725	0.0694805	0.0399426	-0.337757	0.0317347	0.407238	Scaling	Scaling	Buffering	Scaling
DCAF11	0.123439	0.508271	0.0019771	-1.07009	0.00131282	1.57836	sp.Q8TEB1.DCA11_HUMAN	0.150508	0.469322	0.0651385	-0.329286	0.0354056	0.798608	Scaling	Scaling	Scaling	Scaling
DCAF5	0.0782848	0.74797	0.0370627	-0.712382	0.00697885	1.46035	sp.Q96JK2.DCAF5_HUMAN	0.267361	0.383542	0.142733	-0.198884	0.119525	0.582426	Scaling	Scaling	Scaling	Buffering
DCLK1	1.87424e-05	-0.798537	0.668111	0.221876	0.061283	-1.02041	sp.O15075.DCLK1_HUMAN	0.149576	-0.472141	0.427848	0.414801	0.126174	-0.886942	Anti-Scaling	Anti-Scaling	Anti-Scaling	Anti-Scaling
DCP1B	0.796408	0.0924337	0.301199	-0.626051	0.266005	0.718484	sp.Q8IZD4.DCP1B_HUMAN	0.659001	0.154349	0.986796	-0.00568169	0.725592	0.16003	Buffering	Scaling	Buffering	Buffering
DCPS	0.241264	0.180582	0.0187174	-0.657655	0.00655595	0.838237	sp.Q96C86.DCPS_HUMAN	0.188548	0.561501	0.101272	-0.611722	0.0346409	1.17322	Buffering	Scaling	Scaling	Scaling
DCT	0.714254	0.355101	0.652985	0.423012	0.95796	-0.067911	sp.P40126.2.TYRP2_HUMAN	0.920388	-0.0446194	0.621042	-0.172767	0.80081	0.128148	Scaling	Anti-Scaling	Buffering	Buffering
DCTN1	0.22449	0.525961	0.963842	0.0215589	0.400132	0.504402	sp.Q14203.DCTN1_HUMAN	0.643289	-0.180148	0.642248	0.131248	0.49879	-0.311396	Scaling	Buffering	Anti-Scaling	Anti-Scaling
DCTN2	0.524579	0.175006	0.530972	0.7853	0.621573	-0.610295	sp.Q13561.DCTN2_HUMAN	0.0195827	-0.324975	0.898297	0.0837661	0.553401	-0.408741	Buffering	Anti-Scaling	Anti-Scaling	Buffering
DCTN3	0.3609	0.317748	0.705169	-0.0777314	0.300383	0.395479	sp.O75935.DCTN3_HUMAN	0.987537	-0.00287196	0.24131	0.174716	0.413015	-0.177588	Scaling	Buffering	Buffering	Anti-Scaling
DCTN5	0.0242322	0.228661	0.131382	-0.48944	0.0397978	0.718101	sp.Q9BTE1.DCTN5_HUMAN	0.50273	-0.224482	0.753299	0.0549982	0.436179	-0.27948	Buffering	Scaling	Anti-Scaling	Buffering
DCTN6	0.0521116	0.389789	0.0592604	-0.438782	0.00574569	0.828571	sp.O00399.DCTN6_HUMAN	0.600887	0.102338	0.546764	-0.0942959	0.402145	0.196634	Scaling	Scaling	Buffering	Buffering
DCTPP1	0.98631	0.00519204	0.0720685	-0.607513	0.159208	0.612705	sp.Q9H773.DCTP1_HUMAN	0.224305	0.188083	0.367049	-0.318617	0.165814	0.5067	Buffering	Scaling	Buffering	Scaling
DCUN1D2	0.307959	0.285101	0.017825	-0.704049	0.0125865	0.989149	sp.Q6PH85.DCNL2_HUMAN	0.268594	0.539706	0.168657	-0.535784	0.0775343	1.07549	Scaling	Scaling	Scaling	Scaling
DCUN1D3	0.572268	0.0559589	0.0343954	-0.557985	0.0236645	0.613944	sp.Q8IWE4.DCNL3_HUMAN	7.54269e-06	0.517828	0.0464847	-0.88731	0.0061858	1.40514	Buffering	Scaling	Scaling	Scaling
DCUN1D5	0.0294639	0.660756	0.0344902	-0.751433	0.00213457	1.41219	sp.Q9BTE7.DCNL5_HUMAN	0.109683	0.255384	0.0126438	-0.424501	0.00248174	0.679885	Scaling	Scaling	Scaling	Scaling
DDA1	0.895738	-0.0279753	0.159161	-0.622548	0.168849	0.594573	sp.Q9BW61.DDA1_HUMAN	0.796118	-0.159165	0.0264513	0.692231	0.251272	-0.851396	Buffering	Scaling	Anti-Scaling	Anti-Scaling
DDB1	0.316218	0.229096	0.119631	0.181486	0.837066	0.0476105	sp.Q16531.DDB1_HUMAN	0.944573	0.0155914	0.665091	0.0516263	0.8802	-0.0360349	Buffering	Anti-Scaling	Buffering	Buffering
DDHD1	0.878673	0.142557	0.0015472	-1.0184	0.258646	1.16095	sp.Q8NEL9.DDHD1_HUMAN	0.92785	-0.0791642	0.0344836	-0.65112	0.535398	0.571956	Buffering	Scaling	Buffering	Scaling
DDHD2	0.259684	0.203201	0.860925	-0.0555368	0.454367	0.258737	sp.O94830.DDHD2_HUMAN	0.247994	0.24496	0.725224	-0.0925019	0.297394	0.337462	Buffering	Buffering	Buffering	Buffering
DDRGK1	0.0254214	0.550922	7.28775e-05	-0.796725	4.56581e-05	1.34765	sp.Q96HY6.DDRGK_HUMAN	0.0232451	0.338809	0.201006	-0.304794	0.0171815	0.643603	Scaling	Scaling	Scaling	Scaling
DDX1	0.459993	0.216114	0.0900939	-0.637978	0.0574043	0.854092	sp.Q92499.DDX1_HUMAN	0.259768	0.0964285	0.364627	-0.135873	0.17118	0.232302	Buffering	Scaling	Buffering	Buffering
DDX10	0.0521819	0.586479	0.15702	-0.443094	0.01438	1.02957	sp.Q13206.DDX10_HUMAN	0.511767	0.182275	0.0792867	-0.319691	0.125042	0.501966	Scaling	Scaling	Buffering	Scaling
DDX19A	0.0145738	0.619728	0.0129797	-0.696515	0.000433983	1.31624	sp.Q9NUU7.DD19A_HUMAN	0.980315	0.010248	0.296605	-0.234991	0.588729	0.245239	Scaling	Scaling	Buffering	Buffering
DDX19B	0.0525161	0.757783	0.340458	-0.248003	0.0245207	1.00579	sp.Q9UMR2.DD19B_HUMAN	0.332802	0.332039	0.148836	-0.183394	0.160968	0.515433	Scaling	Buffering	Scaling	Buffering
DDX23	0.0852061	0.321685	0.814812	0.169312	0.834316	0.152373	sp.Q9BUQ8.DDX23_HUMAN	0.341382	0.255568	0.394553	0.425943	0.731349	-0.170376	Scaling	Anti-Scaling	Scaling	Anti-Scaling
DDX24	0.0519712	0.616003	0.10375	-0.496362	0.00896346	1.11236	sp.Q9GZR7.DDX24_HUMAN	0.722562	0.120625	0.146213	-0.254272	0.319943	0.374897	Scaling	Scaling	Buffering	Scaling
DDX28	0.378545	0.305893	9.49292e-05	-0.579955	0.0358028	0.885847	sp.Q9NUL7.DDX28_HUMAN	0.0102881	0.509317	0.838131	-0.0405602	0.0310937	0.549878	Scaling	Scaling	Scaling	Buffering
DDX31	0.637576	-0.062978	0.261384	-0.213764	0.47371	0.150786	sp.Q9H8H2.DDX31_HUMAN	0.501972	0.127171	0.471717	-0.156638	0.295041	0.283809	Buffering	Buffering	Buffering	Buffering
DDX39A	0.0405349	0.955717	0.448627	-0.468148	0.0874193	1.42387	sp.O00148.DX39A_HUMAN	0.0679009	1.10196	0.0848006	-0.630975	0.0136522	1.73294	Scaling	Scaling	Scaling	Scaling
DDX47	0.0186368	0.410593	0.278584	-0.960625	0.165273	1.37122	sp.Q9H0S4.DDX47_HUMAN	0.132697	0.292123	0.522534	-0.361646	0.295898	0.653769	Scaling	Scaling	Scaling	Scaling
DDX49	0.60824	0.211502	0.380337	-0.55323	0.282943	0.764732	sp.Q9Y6V7.DDX49_HUMAN	0.753921	-0.220939	0.0566896	-0.688506	0.531834	0.467567	Buffering	Scaling	Anti-Scaling	Scaling
DDX51	0.215371	0.385764	0.906475	0.0640116	0.592187	0.321752	sp.Q8N8A6.DDX51_HUMAN	0.264756	0.0993621	0.555271	0.30092	0.685586	-0.201558	Scaling	Buffering	Buffering	Anti-Scaling
DDX54	0.127943	0.419533	0.267947	-0.461814	0.0800884	0.881347	sp.Q8TDD1.2.DDX54_HUMAN	0.237528	0.368023	0.815923	-0.0844169	0.321394	0.45244	Scaling	Scaling	Scaling	Buffering
DDX55	0.0198155	0.540893	0.837254	-0.111805	0.303379	0.652698	sp.Q8NHQ9.DDX55_HUMAN	0.458691	0.272558	0.514819	0.54921	0.744114	-0.276652	Scaling	Buffering	Scaling	Anti-Scaling
DDX56	0.000288602	0.470396	1.7947e-07	-1.03702	4.71721e-12	1.50742	sp.Q9NY93.DDX56_HUMAN	0.165664	0.184871	0.0815941	-0.763044	0.0440882	0.947915	Scaling	Scaling	Buffering	Scaling
DDX58	0.619438	0.199575	0.437811	-0.263776	0.347761	0.463352	sp.O95786.DDX58_HUMAN	0.43957	0.349003	0.280862	-0.283063	0.216471	0.632066	Buffering	Scaling	Scaling	Scaling
DDX6	0.961554	-0.00855994	0.0335373	-0.525163	0.065273	0.516603	sp.P26196.DDX6_HUMAN	0.809062	0.0368567	0.990275	-0.0013959	0.817062	0.0382526	Buffering	Scaling	Buffering	Buffering
DECR2	0.772203	-0.0671601	0.0332103	-0.838911	0.06738	0.771751	sp.Q9NUI1.DECR2_HUMAN	0.924026	0.0378684	0.276899	-0.292925	0.469192	0.330793	Buffering	Scaling	Buffering	Scaling
DEF8	0.712899	0.102863	0.153284	-0.393977	0.156248	0.496841	sp.Q6ZN54.DEFI8_HUMAN	0.887446	-0.056538	0.973859	0.0117552	0.889887	-0.0682932	Buffering	Scaling	Buffering	Buffering
DENND1A	0.851584	-0.0317928	0.490722	-0.256032	0.560096	0.22424	sp.Q8TEH3.DEN1A_HUMAN	0.462307	-0.218889	0.889579	0.051774	0.553521	-0.270663	Buffering	Scaling	Anti-Scaling	Buffering
DENND4C	0.14431	0.814403	0.166929	-0.249857	0.0769942	1.06426	tr.R4GNB2.R4GNB2_HUMAN	0.25473	0.576806	0.273295	-0.153608	0.171765	0.730414	Scaling	Buffering	Scaling	Buffering
DENR	0.114612	0.540642	0.509728	0.132346	0.229397	0.408297	sp.O43583.DENR_HUMAN	0.667414	0.0882594	0.110353	-0.259058	0.144043	0.347317	Scaling	Anti-Scaling	Buffering	Scaling
DERA	0.0212709	0.358015	0.482997	-0.527412	0.285705	0.885427	sp.Q9Y315.DEOC_HUMAN	0.888663	-0.0337829	0.185605	-0.367098	0.289311	0.333316	Scaling	Scaling	Buffering	Scaling
DGKA	0.503475	0.28315	0.3416	0.653598	0.59433	-0.370448	sp.P23743.DGKA_HUMAN	0.700249	0.157409	0.303253	-0.307457	0.32879	0.464865	Scaling	Anti-Scaling	Buffering	Scaling
DGKH	0.0704303	-0.488942	0.0802118	-0.447533	0.894515	-0.0414095	sp.Q86XP1.2.DGKH_HUMAN	0.456021	-0.260877	0.684659	-0.0971272	0.667531	-0.16375	Anti-Scaling	Scaling	Anti-Scaling	Buffering
DGUOK	0.0470711	0.412166	0.762107	-0.124169	0.251396	0.536335	sp.Q16854.DGUOK_HUMAN	0.0470719	0.891861	0.964057	0.0192621	0.124086	0.872599	Scaling	Buffering	Scaling	Buffering
DHCR7	0.462901	-0.837174	0.81715	0.107093	0.434601	-0.944267	sp.Q9UBM7.DHCR7_HUMAN	0.425944	-0.581246	0.50072	0.260269	0.297379	-0.841515	Anti-Scaling	Anti-Scaling	Anti-Scaling	Anti-Scaling
DHODH	0.692472	0.19781	0.0760995	-0.496074	0.225017	0.693884	sp.Q02127.PYRD_HUMAN	0.180966	0.456948	0.215946	-0.326995	0.0620284	0.783942	Buffering	Scaling	Scaling	Scaling
DHPS	0.240415	0.539843	0.818891	-0.100691	0.275883	0.640534	sp.P49366.DHYS_HUMAN	0.492406	0.404731	0.32627	-0.261172	0.30365	0.665904	Scaling	Buffering	Scaling	Scaling
DHRS1	0.07073	0.619423	0.14345	-0.277149	0.0204605	0.896572	sp.Q96LJ7.DHRS1_HUMAN	0.0549613	0.807202	0.802356	0.065199	0.0881793	0.742003	Scaling	Scaling	Scaling	Buffering
DHRS2	0.239157	1.75261	0.00574587	-1.30269	0.0702983	3.0553	sp.Q13268.DHRS2_HUMAN	0.0887858	1.85628	0.0508595	-0.870568	0.0266403	2.72685	Scaling	Scaling	Scaling	Scaling
DHRS4	0.315823	0.384625	0.41182	-0.303099	0.177122	0.687723	sp.Q9BTZ2.DHRS4_HUMAN	0.284818	0.591982	0.332033	-0.324549	0.145331	0.916531	Scaling	Scaling	Scaling	Scaling
DHRS7	0.0768539	0.65959	0.719134	-0.0795377	0.0626612	0.739128	sp.Q9Y394.DHRS7_HUMAN	0.167218	0.423557	0.324334	0.286568	0.706675	0.136989	Scaling	Buffering	Scaling	Anti-Scaling
DHRS7B	0.190212	0.982242	0.000976635	-0.857303	0.0536573	1.83955	sp.Q6IAN0.DRS7B_HUMAN	0.323272	1.05169	0.0824576	-0.640121	0.159116	1.69182	Scaling	Scaling	Scaling	Scaling
DHTKD1	0.336997	-0.565195	0.000606188	-0.635674	0.900402	0.0704789	sp.Q96HY7.DHTK1_HUMAN	0.900662	-0.0488736	0.0984762	-0.408079	0.415868	0.359206	Anti-Scaling	Scaling	Buffering	Scaling
DHX33	0.777619	-0.196275	0.00388539	-0.590095	0.586893	0.393821	sp.Q9H6R0.DHX33_HUMAN	0.0772041	0.253505	0.0521529	0.528545	0.295636	-0.27504	Anti-Scaling	Scaling	Scaling	Anti-Scaling
DHX34	0.0248012	0.541815	0.464045	-0.341833	0.128866	0.883648	sp.Q14147.DHX34_HUMAN	0.515418	0.184305	0.857742	-0.0823611	0.61044	0.266666	Scaling	Scaling	Buffering	Buffering
DHX37	0.377105	0.141588	0.0385651	-0.667994	0.0153132	0.809582	sp.Q8IY37.DHX37_HUMAN	0.93465	0.0249213	0.873283	-0.0750971	0.851342	0.100018	Buffering	Scaling	Buffering	Buffering
DHX38	0.689828	0.162625	0.00774874	-0.675443	0.0872091	0.838068	sp.Q92620.PRP16_HUMAN	0.16855	0.396842	0.800658	-0.0503977	0.177911	0.44724	Buffering	Scaling	Scaling	Buffering
DHX57	0.136428	0.732258	0.179208	-0.28828	0.0602102	1.02054	sp.Q6P158.DHX57_HUMAN	0.54907	0.272801	0.687577	0.0247583	0.583658	0.248043	Scaling	Scaling	Scaling	Buffering
DIABLO	0.00140676	0.39289	0.674763	-0.0540038	0.0330374	0.446894	sp.Q9NR28.DBLOH_HUMAN	0.0132173	0.636722	0.718898	0.159133	0.338506	0.477589	Scaling	Buffering	Scaling	Anti-Scaling
DIAPH3	0.931944	-0.0217997	0.665585	-0.101952	0.801166	0.080152	sp.Q9NSV4.DIAP3_HUMAN	0.899999	0.0393063	0.704868	0.112324	0.858954	-0.0730178	Buffering	Buffering	Buffering	Anti-Scaling
DICER1	0.037579	1.17826	0.00177143	-0.999002	0.00237556	2.17726	sp.Q9UPY3.DICER_HUMAN	0.0138801	0.408279	0.0197943	-0.353893	0.000698169	0.762172	Scaling	Scaling	Scaling	Scaling
DIP2B	0.820569	0.0563058	0.935067	-0.0159572	0.804175	0.072263	sp.Q9P265.DIP2B_HUMAN	0.534409	-0.100922	0.572465	0.367212	0.485567	-0.468134	Buffering	Buffering	Anti-Scaling	Anti-Scaling
DIS3	0.107517	0.30417	0.0153048	-0.505848	0.00302471	0.810019	sp.Q9Y2L1.RRP44_HUMAN	0.0379849	0.844181	0.247563	-0.273907	0.0139228	1.11809	Scaling	Scaling	Scaling	Scaling
DIXDC1	0.119546	-0.976167	0.0466481	-0.887629	0.891062	-0.088538	sp.Q155Q3.DIXC1_HUMAN	0.129777	-1.37317	0.172943	-0.646168	0.350158	-0.727003	Anti-Scaling	Scaling	Anti-Scaling	Scaling
DLAT	0.294272	0.299636	0.00644626	-0.89803	0.00502811	1.19767	sp.P10515.ODP2_HUMAN	0.0451919	0.574911	0.0325291	-0.674142	0.00280903	1.24905	Scaling	Scaling	Scaling	Scaling
DLC1	0.411175	-0.626027	0.9151	-0.0668039	0.53616	-0.559223	tr.E9PDZ8.E9PDZ8_HUMAN	0.72095	-0.157795	0.832791	-0.0895446	0.893493	-0.0682508	Anti-Scaling	Buffering	Anti-Scaling	Buffering
DLG2	0.660632	0.316959	0.00525501	-0.519567	0.270602	0.836526	sp.Q15700.2.DLG2_HUMAN	0.209982	0.374837	0.770325	0.0688215	0.366433	0.306016	Scaling	Scaling	Scaling	Buffering
DLGAP5	0.468466	0.362386	0.518528	-0.148073	0.342143	0.510459	sp.Q15398.DLGP5_HUMAN	0.714706	0.0605132	0.185035	-0.498426	0.14894	0.55894	Scaling	Buffering	Buffering	Scaling
DLST	0.0131474	0.539989	0.0612353	-0.511845	0.00267892	1.05183	sp.P36957.ODO2_HUMAN	0.00508359	0.633447	0.205761	-0.22249	0.00164494	0.855936	Scaling	Scaling	Scaling	Buffering
DMTN	0.0947693	-1.112	0.671536	-0.209877	0.221301	-0.902118	sp.Q08495.DEMA_HUMAN	0.485629	-0.391461	0.225539	-0.407322	0.978548	0.0158607	Anti-Scaling	Buffering	Anti-Scaling	Scaling
DNAAF2	0.0119254	0.725005	0.0124738	-0.905368	0.000433739	1.63037	sp.Q9NVR5.KTU_HUMAN	0.414936	0.473017	0.0186612	-0.90528	0.061056	1.3783	Scaling	Scaling	Scaling	Scaling
DNAJA1	0.525499	-0.234378	0.111852	-0.296271	0.8719	0.0618932	sp.P31689.DNJA1_HUMAN	0.44217	0.564445	0.331045	-0.148914	0.346297	0.713359	Anti-Scaling	Scaling	Scaling	Buffering
DNAJA2	0.000267985	0.432492	0.00160053	-0.726798	4.88129e-05	1.15929	sp.O60884.DNJA2_HUMAN	0.0208902	0.214827	0.0468771	-0.434814	0.00729386	0.64964	Scaling	Scaling	Buffering	Scaling
DNAJA3	0.64426	0.0676163	0.00527078	-0.797482	0.00531356	0.865098	sp.Q96EY1.DNJA3_HUMAN	0.0135283	0.35378	0.0137814	-0.491113	0.000725474	0.844893	Buffering	Scaling	Scaling	Scaling
DNAJB1	0.0794994	-0.636284	0.623125	-0.438038	0.822181	-0.198247	sp.P25685.DNJB1_HUMAN	0.465564	0.514713	0.228147	-0.640949	0.179256	1.15566	Anti-Scaling	Scaling	Scaling	Scaling
DNAJC1	0.37983	0.395611	0.96644	0.00808064	0.396574	0.38753	sp.Q96KC8.DNJC1_HUMAN	0.540528	0.224658	0.734232	-0.0658092	0.456516	0.290467	Scaling	Buffering	Buffering	Buffering
DNAJC14	0.238871	0.268384	0.207836	-0.270655	0.0720305	0.539039	sp.Q6Y2X3.DJC14_HUMAN	0.00472155	0.320934	0.173753	-0.625399	0.0873004	0.946333	Scaling	Scaling	Scaling	Scaling
DNAJC15	0.414083	0.379534	0.662892	-0.283923	0.377237	0.663457	sp.Q9Y5T4.DJC15_HUMAN	0.836945	-0.0983906	0.69701	-0.272355	0.826882	0.173965	Scaling	Scaling	Buffering	Scaling
DNAJC25	0.0373478	0.381543	0.349482	0.431201	0.912156	-0.0496576	sp.Q9H1X3.DJC25_HUMAN	0.112449	0.354073	0.396023	0.291855	0.86309	0.0622178	Scaling	Anti-Scaling	Scaling	Anti-Scaling
DNAJC3	0.483363	0.261149	0.0213315	-0.562997	0.0639288	0.824146	sp.Q13217.DNJC3_HUMAN	0.435723	0.273862	0.153908	-0.36771	0.12281	0.641572	Scaling	Scaling	Scaling	Scaling
DNAL1	0.0613095	0.912801	0.627886	0.103844	0.0904128	0.808956	sp.Q4LDG9.DNAL1_HUMAN	0.358744	0.379942	0.478435	-0.201117	0.218899	0.581059	Scaling	Anti-Scaling	Scaling	Buffering
DNASE2	0.0183176	-1.74215	0.273401	-1.16597	0.54803	-0.576186	sp.O00115.DNS2A_HUMAN	4.12156e-08	-1.06872	0.617228	-0.304778	0.27626	-0.76394	Anti-Scaling	Scaling	Anti-Scaling	Scaling
DNLZ	0.417195	-0.25222	0.515782	-0.189442	0.872162	-0.0627785	sp.Q5SXM8.DNLZ_HUMAN	0.000148537	0.416109	0.91261	-0.0572154	0.390827	0.473324	Anti-Scaling	Buffering	Scaling	Buffering
DNM1	0.126588	0.813097	0.821933	-0.256967	0.388883	1.07006	sp.Q05193.DYN1_HUMAN	0.16746	0.652721	0.876446	0.123807	0.551083	0.528914	Scaling	Scaling	Scaling	Anti-Scaling
DNM1L	0.00793423	0.359669	0.900686	0.0253123	0.182332	0.334357	sp.O00429.2.DNM1L_HUMAN	0.0669739	0.332161	0.632303	-0.0935812	0.106115	0.425742	Scaling	Buffering	Scaling	Buffering
DNM2	0.144972	0.272266	0.746674	-0.227621	0.502425	0.499887	sp.P50570.DYN2_HUMAN	0.116479	0.587006	0.0507137	-0.602566	0.017558	1.18957	Scaling	Buffering	Scaling	Scaling
DNMT1	0.0602297	0.736232	0.944731	0.061808	0.485632	0.674424	sp.P26358.2.DNMT1_HUMAN	0.0280855	0.525512	0.508223	-0.455387	0.223407	0.9809	Scaling	Buffering	Scaling	Scaling
DNMT3A	0.578205	0.367755	0.449232	-0.73751	0.32725	1.10526	sp.Q9Y6K1.DNM3A_HUMAN	1.03431e-07	0.685932	0.265915	-0.414415	0.0337913	1.10035	Scaling	Scaling	Scaling	Scaling
DOCK5	0.949979	-0.0396092	0.257275	0.496386	0.451258	-0.535996	sp.Q9H7D0.DOCK5_HUMAN	0.525271	0.251763	0.775954	0.0860677	0.719925	0.165695	Buffering	Anti-Scaling	Scaling	Buffering
DOCK6	0.403739	-0.755655	0.479417	-1.09753	0.829306	0.341876	sp.Q96HP0.DOCK6_HUMAN	0.42516	-0.562029	0.655454	-0.318094	0.784102	-0.243934	Anti-Scaling	Scaling	Anti-Scaling	Scaling
DOCK8	0.286716	1.63543	0.0213159	-0.914937	0.134154	2.55036	sp.Q8NF50.DOCK8_HUMAN	0.293243	1.20213	0.128185	-0.741332	0.133947	1.94346	Scaling	Scaling	Scaling	Scaling
DOCK9	0.0351306	-2.14626	0.690715	-0.246928	0.0772561	-1.89934	tr.H0Y572.H0Y572_HUMAN	0.710243	-0.304001	0.800743	-0.166166	0.886677	-0.137835	Anti-Scaling	Buffering	Anti-Scaling	Buffering
DOCK9	0.0351306	-2.14626	0.690715	-0.246928	0.0772561	-1.89934	sp.Q9BZ29.4.DOCK9_HUMAN	0.156025	-0.531489	0.893951	-0.0426005	0.281904	-0.488889	Anti-Scaling	Buffering	Anti-Scaling	Buffering
DOHH	0.650352	0.152385	0.208553	-0.564306	0.165934	0.716691	sp.Q9BU89.DOHH_HUMAN	0.819467	-0.254897	0.627699	-0.306985	0.965688	0.0520879	Buffering	Scaling	Anti-Scaling	Scaling
DOK1	0.648121	-0.420336	0.902733	-0.105711	0.791395	-0.314625	sp.Q99704.DOK1_HUMAN	0.397704	0.17068	0.403832	-0.59476	0.296945	0.76544	Anti-Scaling	Buffering	Buffering	Scaling
DOK2	0.0630141	1.37355	0.0135359	-0.292506	0.027663	1.66605	sp.O60496.DOK2_HUMAN	0.146626	1.38019	0.16331	-0.919186	0.0333559	2.29938	Scaling	Scaling	Scaling	Scaling
DOLK	0.0455735	0.353048	0.363089	-0.454169	0.14113	0.807217	sp.Q9UPQ8.DOLK_HUMAN	0.228401	0.20879	0.339862	-0.45631	0.188242	0.6651	Scaling	Scaling	Buffering	Scaling
DOLPP1	0.104375	0.365538	0.983419	0.00611777	0.307112	0.359421	sp.Q86YN1.DOPP1_HUMAN	0.0702124	0.744056	0.400466	0.364265	0.469445	0.379791	Scaling	Buffering	Scaling	Anti-Scaling
DPAGT1	0.000319776	0.606621	0.0196684	-0.680404	0.000487177	1.28702	sp.Q9H3H5.GPT_HUMAN	0.279368	0.302959	0.0801502	-0.343843	0.0557545	0.646803	Scaling	Scaling	Scaling	Scaling
DPF2	0.810444	-0.0334659	0.393841	-0.551834	0.427163	0.518368	sp.Q92785.REQU_HUMAN	0.224647	0.19992	0.724344	-0.173786	0.449848	0.373706	Buffering	Scaling	Buffering	Buffering
DPF3	0.419368	0.389517	0.119358	1.02822	0.386763	-0.638708	sp.Q92784.2.DPF3_HUMAN	0.653512	-0.267247	0.161722	1.1641	0.136712	-1.43134	Scaling	Anti-Scaling	Anti-Scaling	Anti-Scaling
DPH1	0.600298	0.0481363	0.00176022	-0.686484	0.00133188	0.73462	sp.Q9BZG8.DPH1_HUMAN	0.203626	0.651873	0.252139	0.231126	0.365232	0.420746	Buffering	Scaling	Scaling	Anti-Scaling
DPH7	0.243896	0.257947	0.741895	-0.0697734	0.259069	0.32772	sp.Q9BTV6.DPH7_HUMAN	0.462738	-0.439825	0.772302	0.227317	0.479603	-0.667142	Scaling	Buffering	Anti-Scaling	Anti-Scaling
DPP3	0.0903898	0.464691	0.0919662	0.361727	0.725977	0.102964	sp.Q9NY33.DPP3_HUMAN	0.632707	0.150151	0.588778	0.14976	0.999209	0.000391009	Scaling	Anti-Scaling	Buffering	Anti-Scaling
DPP7	0.563537	-0.205935	0.532004	-0.741486	0.653904	0.535551	sp.Q9UHL4.DPP2_HUMAN	0.619394	-0.214362	0.985245	-0.01343	0.803864	-0.200932	Anti-Scaling	Scaling	Anti-Scaling	Buffering
DPP9	0.0445361	-0.183534	0.918365	-0.0806342	0.895981	-0.1029	sp.Q86TI2.2.DPP9_HUMAN	0.453141	0.582473	0.649604	-0.159703	0.368543	0.742176	Anti-Scaling	Buffering	Scaling	Buffering
DPY19L1	0.0979694	0.456566	0.0660713	-0.769195	0.0107903	1.22576	sp.Q2PZI1.D19L1_HUMAN	0.158815	0.341793	0.107361	-0.992761	0.046395	1.33455	Scaling	Scaling	Scaling	Scaling
DPYSL2	0.0048313	1.10471	0.368502	-0.478309	0.0128101	1.58302	sp.Q16555.2.DPYL2_HUMAN	0.00286234	1.12	0.667596	-0.15279	0.00742496	1.27279	Scaling	Scaling	Scaling	Buffering
DPYSL5	0.000251926	-0.655928	0.775312	-0.130575	0.274511	-0.525352	sp.Q9BPU6.DPYL5_HUMAN	0.264807	-0.310347	0.284568	0.394325	0.111539	-0.704672	Anti-Scaling	Buffering	Anti-Scaling	Anti-Scaling
DRAP1	0.927209	-0.0248345	0.544825	0.244866	0.559978	-0.269701	sp.Q14919.2.NC2A_HUMAN	0.67423	0.142122	0.679988	-0.101255	0.542254	0.243378	Buffering	Anti-Scaling	Buffering	Buffering
DRG2	0.162045	0.657874	0.000189931	-0.695206	0.0326459	1.35308	sp.P55039.DRG2_HUMAN	0.566028	0.148183	0.265353	0.355182	0.578741	-0.206999	Scaling	Scaling	Buffering	Anti-Scaling
DSTN	0.222153	0.553545	0.690622	-0.159341	0.192215	0.712886	sp.P60981.DEST_HUMAN	0.760768	-0.0637386	0.592465	-0.164451	0.765782	0.100713	Scaling	Buffering	Buffering	Buffering
DTD1	0.441622	0.204583	0.997383	0.00129062	0.613061	0.203292	sp.Q8TEA8.DTD1_HUMAN	0.51011	0.186414	0.335801	-0.292185	0.203801	0.478598	Buffering	Buffering	Buffering	Scaling
DTNB	0.373162	0.142341	0.833294	0.169842	0.972827	-0.0275017	sp.O60941.DTNB_HUMAN	0.000438374	0.51548	0.87842	-0.159285	0.531033	0.674764	Buffering	Anti-Scaling	Scaling	Buffering
DUS2	0.0806808	0.576899	0.0431016	-0.596113	0.00709338	1.17301	sp.Q9NX74.DUS2L_HUMAN	0.0712139	0.385427	0.508716	-0.136522	0.0627106	0.521948	Scaling	Scaling	Scaling	Buffering
DUS3L	0.398507	0.475609	0.904119	0.0615379	0.549094	0.414072	sp.Q96G46.DUS3L_HUMAN	0.0410143	0.715234	0.587479	0.3596	0.597312	0.355634	Scaling	Buffering	Scaling	Anti-Scaling
DUSP11	0.0451952	0.367901	0.397155	-0.361979	0.138314	0.72988	sp.O75319.DUS11_HUMAN	0.511777	0.11708	0.18178	-0.399368	0.116487	0.516449	Scaling	Scaling	Buffering	Scaling
DUSP4	0.445729	0.67983	0.546838	0.398235	0.78135	0.281594	sp.Q13115.DUS4_HUMAN	0.225173	0.703378	0.472822	0.413589	0.648013	0.289789	Scaling	Anti-Scaling	Scaling	Anti-Scaling
DVL2	0.574347	0.247047	0.0206824	-0.525749	0.155751	0.772796	sp.O14641.DVL2_HUMAN	0.990208	-0.00654052	0.183991	-0.285822	0.624634	0.279282	Buffering	Scaling	Buffering	Scaling
DYNC1H1	0.0134168	0.817619	0.878211	0.0511137	0.068834	0.766506	sp.Q14204.DYHC1_HUMAN	0.890444	0.0553066	0.228993	0.225119	0.690396	-0.169812	Scaling	Buffering	Buffering	Anti-Scaling
DYNC1LI2	0.363983	0.20471	0.0310378	-0.766549	0.0159544	0.971259	sp.O43237.DC1L2_HUMAN	0.150879	0.196768	0.598642	-0.1548	0.246222	0.351568	Buffering	Scaling	Buffering	Buffering
DYNC2H1	0.735765	-0.236525	0.475259	-0.335714	0.899959	0.0991892	sp.Q8NCM8.DYHC2_HUMAN	0.173756	-0.336595	0.0960247	-0.545981	0.554298	0.209386	Anti-Scaling	Scaling	Anti-Scaling	Scaling
DYNLL1	0.710507	0.0842818	0.38127	-0.354755	0.316172	0.439037	sp.P63167.DYL1_HUMAN	0.68562	0.0361697	0.545678	-0.155049	0.466793	0.191218	Buffering	Scaling	Buffering	Buffering
DYNLT1	0.984621	-0.0166598	0.120053	-0.826634	0.419324	0.809975	sp.P63172.DYLT1_HUMAN	0.212289	0.675016	0.0627757	0.25289	0.38083	0.422126	Buffering	Scaling	Scaling	Anti-Scaling
DYSF	0.407357	1.05551	0.859077	0.182351	0.566324	0.873159	sp.O75923.8.DYSF_HUMAN	0.653122	0.160901	0.552062	-1.46803	0.513823	1.62893	Scaling	Anti-Scaling	Buffering	Scaling
E2F4	0.240587	0.334638	0.00184355	-0.925514	0.00247495	1.26015	sp.Q16254.E2F4_HUMAN	0.119448	0.333201	0.00100773	-0.43714	0.0045949	0.770341	Scaling	Scaling	Scaling	Scaling
EAPP	0.0192724	0.645023	0.0429526	-0.487228	0.00147969	1.13225	sp.Q56P03.EAPP_HUMAN	0.358972	0.24777	0.0856248	-0.418509	0.0587308	0.66628	Scaling	Scaling	Buffering	Scaling
EARS2	0.322438	0.358264	0.0118254	-0.699384	0.0321523	1.05765	sp.Q5JPH6.SYEM_HUMAN	0.130602	0.652316	0.00228144	-0.599803	0.0250756	1.25212	Scaling	Scaling	Scaling	Scaling
ECH1	0.000189982	0.924044	0.392928	0.450409	0.374784	0.473635	sp.Q13011.ECH1_HUMAN	0.0978633	0.946784	0.792503	-0.152855	0.167023	1.09964	Scaling	Anti-Scaling	Scaling	Buffering
ECHDC1	0.206914	0.572049	0.009034	-0.70574	0.0305535	1.27779	sp.Q9NTX5.ECHD1_HUMAN	0.0609271	0.616157	0.0368292	-0.625807	0.00329472	1.24196	Scaling	Scaling	Scaling	Scaling
ECHDC3	0.594807	-0.324361	0.756153	0.110851	0.50957	-0.435212	sp.Q96DC8.ECHD3_HUMAN	0.983951	0.0152792	0.956084	0.0272001	0.988564	-0.0119209	Anti-Scaling	Anti-Scaling	Buffering	Buffering
ECI1	0.282143	-0.152365	0.354334	-0.316509	0.627456	0.164144	sp.P42126.ECI1_HUMAN	0.445859	0.4939	0.00100614	-0.816352	0.117867	1.31025	Anti-Scaling	Scaling	Scaling	Scaling
ECSIT	0.00857387	0.493941	0.176098	-0.734747	0.0691961	1.22869	sp.Q9BQ95.ECSIT_HUMAN	0.871418	-0.0313213	0.529138	-0.130387	0.696838	0.0990659	Scaling	Scaling	Buffering	Buffering
EDC4	0.466959	0.185326	0.0076796	-0.76817	0.0107841	0.953496	sp.Q6P2E9.EDC4_HUMAN	0.107607	0.30093	0.118766	-0.195136	0.0248829	0.496066	Buffering	Scaling	Scaling	Buffering
EDF1	0.0229708	0.20731	0.588835	-0.0843404	0.109372	0.29165	sp.O60869.EDF1_HUMAN	0.210776	-0.365313	0.756171	-0.133177	0.631197	-0.232136	Buffering	Buffering	Anti-Scaling	Buffering
EEA1	0.938648	0.0353396	0.253254	-0.429404	0.397031	0.464744	sp.Q15075.EEA1_HUMAN	0.522746	0.335371	0.540002	-0.524463	0.375039	0.859834	Buffering	Scaling	Scaling	Scaling
EED	0.0352293	0.525784	0.0734576	-0.451771	0.00460067	0.977555	sp.O75530.EED_HUMAN	0.758959	0.0549676	0.0426108	-0.50319	0.0531663	0.558158	Scaling	Scaling	Buffering	Scaling
EEF1A1	0.415182	0.327434	0.861642	-0.0384022	0.394425	0.365836	sp.P68104.EF1A1_HUMAN	0.388355	-1.55449	0.146826	0.356822	0.310293	-1.91131	Scaling	Buffering	Anti-Scaling	Anti-Scaling
EEF1G	0.311332	0.155295	0.580579	-0.0764754	0.224037	0.23177	sp.P26641.EF1G_HUMAN	0.435783	0.126287	0.359219	0.1566	0.882918	-0.0303123	Buffering	Buffering	Buffering	Anti-Scaling
EEF2	0.0411796	1.29901	0.34801	-0.833687	0.0732275	2.1327	sp.P13639.EF2_HUMAN	0.142688	0.925702	0.185358	-0.514349	0.0479933	1.44005	Scaling	Scaling	Scaling	Scaling
EEF2K	0.494925	0.177094	0.582817	-0.215503	0.381135	0.392597	sp.O00418.EF2K_HUMAN	0.977338	0.00808428	0.526149	0.211069	0.620735	-0.202985	Buffering	Buffering	Buffering	Anti-Scaling
EEPD1	0.045439	0.816789	0.0217275	-1.60314	0.00171678	2.41993	sp.Q7L9B9.EEPD1_HUMAN	0.0774231	0.463452	0.758368	-0.148187	0.264666	0.611639	Scaling	Scaling	Scaling	Buffering
EFEMP1	0.575602	-0.829944	0.559368	1.34239	0.40981	-2.17233	sp.Q12805.FBLN3_HUMAN	0.863141	0.0902442	0.160538	1.49928	0.194012	-1.40904	Anti-Scaling	Anti-Scaling	Buffering	Anti-Scaling
EFNB2	0.413666	-0.781289	0.168342	-0.752697	0.977403	-0.0285924	sp.P52799.EFNB2_HUMAN	0.208215	-0.843769	0.944429	-0.0434192	0.327692	-0.800349	Anti-Scaling	Scaling	Anti-Scaling	Buffering
EGFR	0.0841778	1.13129	0.387242	-1.31876	0.153971	2.45005	sp.P00533.EGFR_HUMAN	0.0593564	0.760058	0.484445	-0.833092	0.224691	1.59315	Scaling	Scaling	Scaling	Scaling
EHBP1	0.103406	0.835044	0.929631	0.0615405	0.342726	0.773503	sp.Q8NDI1.EHBP1_HUMAN	0.404517	0.38431	0.670576	0.122541	0.602253	0.261769	Scaling	Buffering	Scaling	Anti-Scaling
EHBP1L1	0.0683485	0.39783	0.28182	0.524915	0.790678	-0.127085	sp.Q8N3D4.EH1L1_HUMAN	0.0330277	0.608126	0.385283	0.329586	0.507905	0.27854	Scaling	Anti-Scaling	Scaling	Anti-Scaling
EHD1	0.144055	0.432089	0.00222017	1.30012	0.0397114	-0.868029	sp.Q9H4M9.EHD1_HUMAN	0.0331656	0.451937	0.157786	0.566756	0.772723	-0.114819	Scaling	Anti-Scaling	Scaling	Anti-Scaling
EHD2	0.585396	0.390807	9.07048e-17	-2.80281	0.00380262	3.19362	sp.Q9NZN4.EHD2_HUMAN	0.0106302	-0.368837	0.157139	-0.660562	0.453015	0.291725	Scaling	Scaling	Anti-Scaling	Scaling
EHD3	0.427136	0.568651	0.172736	1.0935	0.567665	-0.524853	sp.Q9NZN3.EHD3_HUMAN	0.0787306	-0.517962	0.564334	0.307406	0.182898	-0.825368	Scaling	Anti-Scaling	Anti-Scaling	Anti-Scaling
EHMT1	0.977181	0.00389972	0.0361812	-0.450515	0.0441966	0.454414	sp.Q9H9B1.EHMT1_HUMAN	0.496426	0.19283	0.31206	-0.174299	0.24789	0.367129	Buffering	Scaling	Buffering	Buffering
EI24	0.845435	0.0583759	0.0166256	-0.698729	0.0582275	0.757105	sp.O14681.EI24_HUMAN	0.598028	0.185623	0.0410659	-0.465863	0.115735	0.651487	Buffering	Scaling	Buffering	Scaling
EIF1AD	0.0603281	0.34524	0.237309	0.252441	0.702908	0.0927991	sp.Q8N9N8.EIF1A_HUMAN	0.456735	0.390086	0.745723	0.136424	0.690485	0.253663	Scaling	Anti-Scaling	Scaling	Anti-Scaling
EIF2AK1	0.000137905	0.379952	0.278736	-0.3929	0.0765497	0.772852	sp.Q9BQI3.E2AK1_HUMAN	0.204879	0.200325	0.745389	-0.163906	0.494836	0.364231	Scaling	Scaling	Buffering	Buffering
EIF2AK2	0.641607	0.186877	0.0683268	-0.740034	0.088097	0.926911	sp.P19525.E2AK2_HUMAN	0.80432	0.0689834	0.895056	-0.0660053	0.807098	0.134989	Buffering	Scaling	Buffering	Buffering
EIF2AK3	0.0171354	0.412269	0.365163	0.615691	0.750208	-0.203422	sp.Q9NZJ5.E2AK3_HUMAN	0.0213547	0.84012	0.0704365	0.383816	0.12735	0.456304	Scaling	Anti-Scaling	Scaling	Anti-Scaling
EIF2B1	0.442988	0.218431	0.486964	-0.234058	0.280458	0.452489	sp.Q14232.EI2BA_HUMAN	0.434106	0.270276	0.939798	0.0377655	0.685639	0.232511	Buffering	Buffering	Scaling	Buffering
EIF2B2	0.00399043	0.731847	0.874315	-0.0378287	0.016353	0.769675	sp.P49770.EI2BB_HUMAN	0.342753	0.197187	0.85679	-0.0413447	0.406723	0.238532	Scaling	Buffering	Buffering	Buffering
EIF2B4	0.00655699	0.753371	0.0773728	-0.295396	0.00103383	1.04877	sp.Q9UI10.2.EI2BD_HUMAN	0.770531	-0.096407	0.985406	0.00398373	0.788904	-0.100391	Scaling	Scaling	Buffering	Buffering
EIF2S1	0.00148857	0.930532	0.264613	-0.323509	0.00221445	1.25404	sp.P05198.IF2A_HUMAN	0.0871795	0.345611	0.953995	-0.00887682	0.123317	0.354487	Scaling	Scaling	Scaling	Buffering
EIF3B	0.000111245	0.427139	0.0346111	-0.544465	0.00313533	0.971604	sp.P55884.2.EIF3B_HUMAN	0.339554	0.1008	0.606623	-0.102173	0.341118	0.202973	Scaling	Scaling	Buffering	Buffering
EIF3C	0.337191	0.495817	0.119948	-0.461677	0.11577	0.957495	sp.Q99613.EIF3C_HUMAN	0.823409	-0.0357683	0.621802	0.0621099	0.594999	-0.0978782	Scaling	Scaling	Buffering	Buffering
EIF3G	0.0523773	0.713854	0.755198	-0.188932	0.223467	0.902786	tr.K7ER90.K7ER90_HUMAN	0.914532	-0.136035	0.222682	0.222198	0.780153	-0.358233	Scaling	Buffering	Anti-Scaling	Anti-Scaling
EIF3G	0.0523773	0.713854	0.755198	-0.188932	0.223467	0.902786	tr.K7ENA8.K7ENA8_HUMAN	0.977793	0.0258166	0.613089	0.0867239	0.948004	-0.0609073	Scaling	Buffering	Buffering	Buffering
EIF3K	0.0195333	0.422615	0.474044	0.28878	0.733601	0.133835	sp.Q9UBQ5.EIF3K_HUMAN	0.938284	0.0112053	0.00783672	0.229327	0.160976	-0.218122	Scaling	Anti-Scaling	Buffering	Anti-Scaling
EIF4A1	0.831994	-0.165254	0.000562204	-0.75287	0.483314	0.587616	sp.P60842.IF4A1_HUMAN	0.53084	0.28358	0.420067	0.139669	0.749062	0.143911	Anti-Scaling	Scaling	Scaling	Anti-Scaling
EIF4B	7.06989e-06	0.513303	0.370335	-0.359242	0.104694	0.872545	sp.P23588.IF4B_HUMAN	0.310383	0.303772	0.00959804	-0.594559	0.0280517	0.898331	Scaling	Scaling	Scaling	Scaling
EIF4EBP1	0.0379984	0.638116	0.352612	-0.324594	0.0287306	0.962711	sp.Q13541.4EBP1_HUMAN	0.0324357	0.9521	0.318797	-0.318049	0.0117309	1.27015	Scaling	Scaling	Scaling	Scaling
EIF5	0.00222481	0.68144	0.0614166	-0.465146	0.000782251	1.14659	sp.P55010.IF5_HUMAN	0.693084	0.0847696	0.174698	-0.411408	0.161073	0.496178	Scaling	Scaling	Buffering	Scaling
EIF5A	0.758127	-0.179235	0.00213513	-0.837402	0.323823	0.658167	sp.P63241.2.IF5A1_HUMAN	0.77765	0.0685553	0.311712	-0.23558	0.33636	0.304136	Anti-Scaling	Scaling	Buffering	Buffering
ELAC2	0.00474174	0.373679	4.02044e-05	-1.09206	3.27425e-06	1.46574	sp.Q9BQ52.RNZ2_HUMAN	0.114396	0.806271	0.246357	-0.263507	0.0430851	1.06978	Scaling	Scaling	Scaling	Scaling
ELAVL1	0.386789	-0.204916	0.650671	-0.331328	0.862254	0.126412	tr.B4DVB8.B4DVB8_HUMAN	0.90689	0.0558411	0.937382	-0.0358577	0.882433	0.0916988	Anti-Scaling	Scaling	Buffering	Buffering
ELF1	0.00780134	0.901677	0.564305	-0.217354	0.0179966	1.11903	sp.P32519.ELF1_HUMAN	0.351495	0.307223	0.483386	-0.261394	0.223984	0.568617	Scaling	Buffering	Scaling	Scaling
ELL	0.0202334	0.588902	0.608767	-0.409952	0.278772	0.998854	sp.P55199.ELL_HUMAN	0.101209	0.49751	0.779648	-0.196278	0.376764	0.693787	Scaling	Scaling	Scaling	Buffering
ELMO1	0.525917	-0.325623	0.318813	1.26188	0.232803	-1.5875	sp.Q92556.ELMO1_HUMAN	0.563078	-0.186829	0.405836	0.829547	0.323296	-1.01638	Anti-Scaling	Anti-Scaling	Anti-Scaling	Anti-Scaling
ELMO3	0.769775	0.204719	0.736576	-0.202923	0.643482	0.407642	sp.Q96BJ8.3.ELMO3_HUMAN	0.822031	0.167651	0.427559	-0.405825	0.500653	0.573476	Buffering	Buffering	Buffering	Scaling
ELMSAN1	0.172228	0.892343	0.033554	-0.709353	0.0369465	1.6017	sp.Q6PJG2.EMSA1_HUMAN	0.441723	0.177714	0.0132883	-0.403846	0.0432095	0.58156	Scaling	Scaling	Buffering	Scaling
ELP3	8.78333e-05	0.63847	0.0189585	-0.465482	2.37236e-05	1.10395	sp.Q9H9T3.ELP3_HUMAN	0.162172	0.376464	0.139309	-0.389731	0.034203	0.766195	Scaling	Scaling	Scaling	Scaling
EMC10	0.0896402	0.878364	0.867886	0.161021	0.501224	0.717342	sp.Q5UCC4.EMC10_HUMAN	0.836256	-0.0555766	0.51156	0.110334	0.573614	-0.165911	Scaling	Anti-Scaling	Buffering	Anti-Scaling
EMC8	0.808139	0.0212109	0.00230433	-0.374947	0.0035466	0.396158	sp.O43402.EMC8_HUMAN	0.295531	0.273012	0.472854	-0.152403	0.177342	0.425415	Buffering	Scaling	Scaling	Buffering
EMC9	0.0236794	0.642683	0.00959944	-0.773841	0.000568971	1.41652	sp.Q9Y3B6.EMC9_HUMAN	0.866169	0.0584901	0.119762	0.632136	0.2457	-0.573646	Scaling	Scaling	Buffering	Anti-Scaling
EML1	0.12491	-1.27266	0.177215	0.830176	0.0347472	-2.10283	sp.O00423.3.EMAL1_HUMAN	0.625374	-0.255254	0.314129	0.584123	0.258299	-0.839378	Anti-Scaling	Anti-Scaling	Anti-Scaling	Anti-Scaling
EML2	0.0599978	0.456013	0.534497	0.655136	0.84366	-0.199123	sp.O95834.3.EMAL2_HUMAN	0.0866424	0.411122	0.387216	0.988308	0.590129	-0.577185	Scaling	Anti-Scaling	Scaling	Anti-Scaling
EML3	0.101848	0.253993	0.349712	0.213528	0.866147	0.0404655	sp.Q32P44.EMAL3_HUMAN	0.144495	0.264804	0.304573	0.233463	0.901186	0.0313406	Scaling	Anti-Scaling	Scaling	Anti-Scaling
EML4	0.0291789	1.57637	0.0907169	-0.681451	0.00568306	2.25782	sp.Q9HC35.EMAL4_HUMAN	0.127539	1.37491	0.629553	-0.153237	0.0990686	1.52815	Scaling	Scaling	Scaling	Buffering
EML5	0.725693	0.228245	0.722752	-0.0912564	0.638937	0.319501	sp.Q05BV3.5.EMAL5_HUMAN	0.714784	0.11239	0.365756	-0.197774	0.366562	0.310164	Buffering	Buffering	Buffering	Buffering
EMSY	0.322217	0.221376	0.851997	-0.0599839	0.453353	0.28136	sp.Q7Z589.EMSY_HUMAN	0.523379	-0.189216	0.565505	-0.140405	0.892225	-0.0488109	Buffering	Buffering	Anti-Scaling	Buffering
ENDOD1	0.829214	0.140258	0.305628	-0.603392	0.372502	0.74365	sp.O94919.ENDD1_HUMAN	0.866179	-0.0930926	0.0586491	-0.752332	0.309206	0.659239	Buffering	Scaling	Buffering	Scaling
ENDOG	0.786489	0.0546871	0.303442	-0.120718	0.412365	0.175405	sp.Q14249.NUCG_HUMAN	0.413642	0.434751	0.395682	-0.287734	0.235361	0.722485	Buffering	Buffering	Scaling	Scaling
ENG	0.446233	0.565639	0.171804	1.42625	0.446698	-0.860608	sp.P17813.EGLN_HUMAN	0.784276	0.185124	0.0880272	1.16142	0.258561	-0.976293	Scaling	Anti-Scaling	Buffering	Anti-Scaling
ENO2	0.89836	0.0531431	0.373969	1.20319	0.393687	-1.15005	sp.P09104.ENOG_HUMAN	0.484754	-0.209492	0.473376	0.571313	0.353997	-0.780805	Buffering	Anti-Scaling	Anti-Scaling	Anti-Scaling
ENO3	0.904817	-0.0728702	0.0640237	-0.490264	0.525125	0.417394	sp.P13929.ENOB_HUMAN	0.318449	-0.501402	0.16249	0.246249	0.179098	-0.747651	Buffering	Scaling	Anti-Scaling	Anti-Scaling
ENOSF1	0.906137	-0.0503106	6.72377e-05	-0.781339	0.149521	0.731028	sp.Q7L5Y1.ENOF1_HUMAN	0.304517	0.654942	0.753794	0.0928933	0.38909	0.562048	Buffering	Scaling	Scaling	Buffering
ENOX1	0.229799	-0.500312	0.501192	-0.241723	0.602197	-0.25859	sp.Q8TC92.ENOX1_HUMAN	0.638901	-0.123518	0.879242	-0.0393369	0.799659	-0.084181	Anti-Scaling	Buffering	Anti-Scaling	Buffering
ENPP1	0.564217	1.03747	0.14472	-0.479074	0.422415	1.51654	sp.P22413.ENPP1_HUMAN	0.428925	1.27124	0.320234	-0.534407	0.29438	1.80565	Scaling	Scaling	Scaling	Scaling
ENTPD4	0.166431	0.285982	0.504827	-0.143176	0.10917	0.429158	sp.Q9Y227.ENTP4_HUMAN	0.647485	-0.181544	0.0660605	-0.613881	0.359695	0.432337	Scaling	Buffering	Anti-Scaling	Scaling
ENTPD5	0.829563	0.104182	0.106601	-0.552094	0.258317	0.656276	sp.O75356.ENTP5_HUMAN	0.868369	-0.0753567	0.400637	0.353402	0.463671	-0.428759	Buffering	Scaling	Buffering	Anti-Scaling
ENTPD6	0.105589	0.563094	0.490854	-0.212099	0.0698711	0.775193	sp.O75354.ENTP6_HUMAN	0.0757117	0.634059	0.613426	-0.123158	0.058018	0.757217	Scaling	Buffering	Scaling	Buffering
EP400	0.693663	0.0916291	0.933298	0.0296809	0.877315	0.0619482	sp.Q96L91.EP400_HUMAN	0.808546	0.0684346	0.430026	0.281791	0.605634	-0.213356	Buffering	Buffering	Buffering	Anti-Scaling
EPB41L2	0.580303	-1.15527	0.0817644	-1.40006	0.906224	0.24479	sp.O43491.E41L2_HUMAN	0.6908	-0.323293	0.0438323	-0.735111	0.62768	0.411818	Anti-Scaling	Scaling	Anti-Scaling	Scaling
EPB41L3	0.370386	1.85179	0.223003	1.70922	0.949068	0.142573	sp.Q9Y2J2.2.E41L3_HUMAN	0.506394	0.787253	0.13401	1.36799	0.66777	-0.580737	Scaling	Anti-Scaling	Scaling	Anti-Scaling
EPC1	0.0741097	0.397205	0.00200848	-0.574985	0.00117342	0.97219	sp.Q9H2F5.2.EPC1_HUMAN	0.97818	-0.00353971	0.00146133	-0.64905	0.00346009	0.64551	Scaling	Scaling	Buffering	Scaling
EPCAM	0.940552	0.178963	0.280084	-1.87907	0.464192	2.05803	sp.P16422.EPCAM_HUMAN	0.940965	0.125814	0.693427	-0.603785	0.736678	0.729599	Buffering	Scaling	Buffering	Scaling
EPHX2	0.707291	0.207649	0.192024	-0.54853	0.228559	0.75618	sp.P34913.HYES_HUMAN	0.597356	-0.265455	0.0251845	-0.616432	0.492072	0.350976	Buffering	Scaling	Anti-Scaling	Scaling
EPN1	0.667929	0.127937	0.420413	-0.247355	0.346065	0.375292	sp.Q9Y6I3.1.EPN1_HUMAN	0.647539	0.0925911	0.733458	-0.066314	0.546137	0.158905	Buffering	Buffering	Buffering	Buffering
EPN2	0.107721	1.14956	0.0157684	-1.26622	0.00678234	2.41577	sp.O95208.EPN2_HUMAN	0.226855	0.587081	0.0347517	-0.917213	0.0206086	1.50429	Scaling	Scaling	Scaling	Scaling
EPS15L1	0.121392	0.40076	0.429268	-0.569657	0.231204	0.970417	sp.Q9UBC2.2.EP15R_HUMAN	0.741565	0.224716	0.731329	0.081325	0.836645	0.143391	Scaling	Scaling	Buffering	Buffering
EPS8	0.5124	0.41554	0.23339	-0.717497	0.147687	1.13304	sp.Q12929.EPS8_HUMAN	0.157859	0.544019	0.0705118	-0.673855	0.0125119	1.21787	Scaling	Scaling	Scaling	Scaling
EPS8L1	0.079135	1.31787	0.459689	-0.77282	0.112545	2.09069	sp.Q8TE68.ES8L1_HUMAN	0.380782	0.659117	0.36038	-0.523674	0.188031	1.18279	Scaling	Scaling	Scaling	Scaling
ERC1	0.428362	-0.164426	0.555903	-0.555909	0.67341	0.391483	sp.Q8IUD2.RB6I2_HUMAN	0.622459	0.102618	0.543792	-0.413402	0.465075	0.51602	Anti-Scaling	Scaling	Buffering	Scaling
ERCC1	0.416654	0.167493	0.565144	0.198109	0.931915	-0.0306159	sp.P07992.3.ERCC1_HUMAN	0.380665	-0.321985	0.737922	-0.0422103	0.451333	-0.279774	Buffering	Anti-Scaling	Anti-Scaling	Buffering
ERCC2	0.041531	0.659331	0.969486	-0.0235772	0.33895	0.682908	sp.P18074.ERCC2_HUMAN	0.212422	0.297096	0.854215	-0.089285	0.474239	0.386381	Scaling	Buffering	Scaling	Buffering
ERCC4	0.729122	0.119143	0.0229663	-0.518906	0.148581	0.638049	sp.Q92889.XPF_HUMAN	0.0619143	0.559348	0.195976	-0.160072	0.0223513	0.71942	Buffering	Scaling	Scaling	Buffering
ERCC5	0.000549512	0.912441	0.0179785	-0.454821	1.77001e-05	1.36726	sp.P28715.ERCC5_HUMAN	0.00170344	0.9366	0.0472074	-0.302037	0.000170278	1.23864	Scaling	Scaling	Scaling	Scaling
ERF	0.590622	0.0997422	0.370606	0.456901	0.473933	-0.357159	sp.P50548.ERF_HUMAN	0.475497	-0.106677	0.657233	0.136998	0.456977	-0.243676	Buffering	Anti-Scaling	Anti-Scaling	Anti-Scaling
ERGIC2	0.276371	0.250641	0.428927	-0.722345	0.314304	0.972986	sp.Q96RQ1.ERGI2_HUMAN	0.844782	0.0307684	0.383898	-0.551168	0.363212	0.581936	Scaling	Scaling	Buffering	Scaling
ERH	0.112973	0.274259	0.235102	-0.26687	0.0488038	0.541129	sp.P84090.ERH_HUMAN	0.72117	0.146175	0.00114116	-0.847674	0.0557931	0.99385	Scaling	Scaling	Buffering	Scaling
ERI1	0.510337	0.118496	0.00310854	-0.625996	0.00308951	0.744492	sp.Q8IV48.ERI1_HUMAN	0.00674174	0.560644	0.0412927	-0.412551	0.000439291	0.973195	Buffering	Scaling	Scaling	Scaling
ERICH1	0.00118676	0.6093	0.0476281	-0.774413	0.0021452	1.38371	sp.Q86X53.ERIC1_HUMAN	0.817407	-0.0895405	0.308795	-0.303316	0.648355	0.213776	Scaling	Scaling	Buffering	Scaling
ERLEC1	0.0480043	0.576622	0.409942	0.430717	0.779337	0.145905	sp.Q96DZ1.ERLEC_HUMAN	0.0819286	0.691015	0.721596	0.235357	0.525223	0.455659	Scaling	Anti-Scaling	Scaling	Anti-Scaling
ERLIN2	0.208955	0.346186	0.468975	-0.233348	0.154334	0.579534	sp.O94905.ERLN2_HUMAN	0.756504	0.111543	0.345641	-0.272571	0.380654	0.384114	Scaling	Buffering	Buffering	Scaling
ERMP1	0.58701	0.522224	0.522363	-0.217194	0.464065	0.739417	sp.Q7Z2K6.ERMP1_HUMAN	0.668455	0.401756	0.848002	-0.0519247	0.635349	0.453681	Scaling	Buffering	Scaling	Buffering
ERP29	0.26426	0.455211	0.901191	0.0531502	0.46215	0.40206	sp.P30040.ERP29_HUMAN	0.0552464	0.928787	0.713793	0.204594	0.282653	0.724193	Scaling	Buffering	Scaling	Anti-Scaling
ERP44	0.020539	0.582254	0.714724	0.107001	0.182805	0.475253	sp.Q9BS26.ERP44_HUMAN	0.0728721	0.359878	0.644117	0.15314	0.56682	0.206738	Scaling	Anti-Scaling	Scaling	Anti-Scaling
ESAM	0.416467	-0.260158	0.147243	-0.487881	0.564188	0.227724	sp.Q96AP7.ESAM_HUMAN	0.534201	-0.388113	0.130391	-0.513185	0.844377	0.125071	Anti-Scaling	Scaling	Anti-Scaling	Scaling
ESCO2	0.475733	0.197844	0.00943057	-0.6816	0.0143786	0.879445	sp.Q56NI9.ESCO2_HUMAN	0.0520161	0.493235	0.516645	-0.146517	0.0333622	0.639753	Buffering	Scaling	Scaling	Buffering
ESD	0.36507	0.28029	0.275307	-0.723037	0.162148	1.00333	sp.P10768.ESTD_HUMAN	0.357516	0.303329	0.330152	-0.554455	0.176882	0.857784	Scaling	Scaling	Scaling	Scaling
ESF1	0.00681629	0.636472	0.0125126	-0.362383	0.000296934	0.998856	sp.Q9H501.ESF1_HUMAN	0.215387	0.248744	0.00154483	-0.489771	0.00314858	0.738515	Scaling	Scaling	Buffering	Scaling
ESRP2	0.0761275	1.62833	0.921488	-0.0921314	0.153017	1.72047	sp.Q9H6T0.2.ESRP2_HUMAN	0.293376	0.855447	0.910131	0.0534557	0.362929	0.801991	Scaling	Buffering	Scaling	Buffering
ESRRA	0.0231167	0.37322	0.430033	0.120014	0.176907	0.253206	sp.P11474.ERR1_HUMAN	0.260177	0.788212	0.215242	0.254096	0.42408	0.534116	Scaling	Anti-Scaling	Scaling	Anti-Scaling
ESYT1	0.844745	0.123676	0.415563	-0.266576	0.570235	0.390252	sp.Q9BSJ8.2.ESYT1_HUMAN	0.37987	0.435655	0.301679	0.224693	0.66651	0.210962	Buffering	Scaling	Scaling	Anti-Scaling
ETFB	0.658435	0.220683	0.180097	0.822299	0.368648	-0.601616	sp.P38117.ETFB_HUMAN	0.563174	0.313726	0.738225	0.144192	0.794588	0.169534	Buffering	Anti-Scaling	Scaling	Anti-Scaling
ETHE1	0.0275307	0.613329	0.311579	-1.83147	0.213371	2.4448	sp.O95571.ETHE1_HUMAN	0.129997	0.63993	0.360714	-0.714986	0.13844	1.35492	Scaling	Scaling	Scaling	Scaling
ETNK1	0.0147167	0.507496	0.685769	-0.18728	0.213107	0.694776	sp.Q9HBU6.EKI1_HUMAN	0.388878	0.202056	0.543023	0.262091	0.893249	-0.0600341	Scaling	Buffering	Buffering	Anti-Scaling
ETS1	0.00795293	1.61307	0.011274	1.70942	0.884256	-0.0963544	sp.P14921.ETS1_HUMAN	0.207143	0.8136	0.331444	0.451978	0.611162	0.361622	Scaling	Anti-Scaling	Scaling	Anti-Scaling
ETV6	0.573774	-0.240729	0.65899	-0.44947	0.842472	0.20874	sp.P41212.ETV6_HUMAN	0.821055	-0.0644497	0.727237	-0.351485	0.778764	0.287035	Anti-Scaling	Scaling	Buffering	Scaling
EVL	0.0623582	-2.64747	0.0212419	-0.99986	0.193072	-1.64761	sp.Q9UI08.2.EVL_HUMAN	0.00414971	-1.48335	0.00026802	-1.12294	0.353086	-0.360404	Anti-Scaling	Scaling	Anti-Scaling	Scaling
EXD2	0.0351812	1.13685	0.186383	-0.656583	0.0105118	1.79343	sp.Q9NVH0.EXD2_HUMAN	0.00149668	1.12059	0.705462	-0.187953	0.0315817	1.30854	Scaling	Scaling	Scaling	Buffering
EXOC3L4	0.176778	-0.378334	4.23835e-05	-0.504633	0.602184	0.126298	sp.Q17RC7.EX3L4_HUMAN	0.0186574	-2.73961	0.0229598	2.33016	0.000719211	-5.06977	Anti-Scaling	Scaling	Anti-Scaling	Anti-Scaling
EXOC5	0.0887046	0.801201	0.194654	-0.298189	0.0341691	1.09939	sp.O00471.EXOC5_HUMAN	0.500782	0.216282	0.295046	0.101589	0.719247	0.114693	Scaling	Scaling	Buffering	Anti-Scaling
EXOC6B	0.0557784	1.04855	0.860397	-0.101311	0.12464	1.14986	sp.Q9Y2D4.EXC6B_HUMAN	0.210186	0.538038	0.620807	0.208711	0.53758	0.329327	Scaling	Buffering	Scaling	Anti-Scaling
EXOSC2	0.296493	-0.208046	0.0687128	-0.828457	0.15182	0.62041	sp.Q13868.EXOS2_HUMAN	0.0878556	0.35948	0.808229	-0.0660339	0.198262	0.425514	Anti-Scaling	Scaling	Scaling	Buffering
EXOSC3	0.659306	0.118608	8.03145e-06	-0.710116	0.0305394	0.828724	sp.Q9NQT5.EXOS3_HUMAN	0.892812	-0.0150552	0.0353749	-0.241134	0.125986	0.226079	Buffering	Scaling	Buffering	Buffering
EXOSC5	0.0649328	0.553386	0.822149	-0.150033	0.354841	0.703419	sp.Q9NQT4.EXOS5_HUMAN	0.328568	0.117383	0.573187	-0.0774274	0.246008	0.194811	Scaling	Buffering	Buffering	Buffering
EXOSC6	0.128412	0.367475	0.0116039	-0.502621	0.00597717	0.870095	sp.Q5RKV6.EXOS6_HUMAN	0.067164	0.480666	0.0534918	-0.318363	0.00984921	0.79903	Scaling	Scaling	Scaling	Scaling
EXOSC8	0.0291862	0.559808	0.0414741	-0.467375	0.00204147	1.02718	sp.Q96B26.EXOS8_HUMAN	0.127847	-0.415896	0.246043	-0.169226	0.375105	-0.24667	Scaling	Scaling	Anti-Scaling	Buffering
EXPH5	0.619652	0.220757	0.147178	-0.529128	0.171587	0.749885	sp.Q8NEV8.EXPH5_HUMAN	0.467367	0.973437	0.579827	-0.364771	0.357836	1.33821	Buffering	Scaling	Scaling	Scaling
EXTL3	0.386301	0.260568	0.609849	-0.147388	0.292775	0.407956	sp.O43909.EXTL3_HUMAN	0.809523	-0.119565	0.503415	-0.128355	0.986267	0.0087898	Scaling	Buffering	Anti-Scaling	Buffering
EZR	0.884499	-0.215723	0.110925	-0.925489	0.651913	0.709766	sp.P15311.EZRI_HUMAN	0.717193	0.346409	0.166578	-0.354322	0.490658	0.700731	Anti-Scaling	Scaling	Scaling	Scaling
FABP7	0.0312226	-0.493296	0.634725	0.525599	0.365345	-1.0189	sp.O15540.FABP7_HUMAN	0.00945861	-0.831015	0.741337	0.317221	0.259539	-1.14824	Anti-Scaling	Anti-Scaling	Anti-Scaling	Anti-Scaling
FADD	0.00262244	0.571766	0.00872819	1.07817	0.151458	-0.506399	sp.Q13158.FADD_HUMAN	0.205533	0.339262	0.127756	0.499712	0.669404	-0.16045	Scaling	Anti-Scaling	Scaling	Anti-Scaling
FADS1	0.727608	0.119698	0.546605	-0.177631	0.419919	0.297329	sp.O60427.FADS1_HUMAN	0.733758	0.17529	0.352701	-0.24906	0.444662	0.424349	Buffering	Buffering	Buffering	Buffering
FADS2	0.298859	-0.814067	0.109698	-1.36466	0.588822	0.550591	sp.O95864.FADS2_HUMAN	0.298496	-0.584144	0.404321	-0.929096	0.765904	0.344952	Anti-Scaling	Scaling	Anti-Scaling	Scaling
FADS3	0.103257	0.960525	0.273783	0.538324	0.527773	0.422201	sp.Q9Y5Q0.FADS3_HUMAN	0.738365	0.192051	0.963258	0.0232776	0.815596	0.168773	Scaling	Anti-Scaling	Buffering	Buffering
FAHD1	0.00789598	0.728756	0.0432968	-0.870515	0.0023834	1.59927	sp.Q6P587.3.FAHD1_HUMAN	0.0556052	0.778764	0.14936	-0.586627	0.0103672	1.36539	Scaling	Scaling	Scaling	Scaling
FAM107B	0.726942	0.260781	0.0387805	-0.946722	0.16075	1.2075	sp.Q9H098.2.F107B_HUMAN	0.977943	0.0250286	0.0941623	-0.771177	0.417252	0.796205	Scaling	Scaling	Buffering	Scaling
FAM110A	0.285582	0.412428	6.03182e-05	-0.828781	0.00681388	1.24121	sp.Q9BQ89.F110A_HUMAN	0.373235	0.623553	0.287478	-0.277301	0.221616	0.900854	Scaling	Scaling	Scaling	Scaling
FAM111A	0.869397	0.0497618	0.00396334	0.754248	0.0515392	-0.704486	sp.Q96PZ2.F111A_HUMAN	0.71546	0.181598	0.178111	0.300551	0.817792	-0.118954	Buffering	Anti-Scaling	Buffering	Anti-Scaling
FAM111B	0.0535119	1.12448	0.134996	0.892587	0.737408	0.231896	sp.Q6SJ93.F111B_HUMAN	0.137621	0.530308	0.0151038	0.777678	0.507605	-0.24737	Scaling	Anti-Scaling	Scaling	Anti-Scaling
FAM118B	0.56423	0.0798992	0.000199749	-0.698848	0.000533582	0.778747	sp.Q9BPY3.F118B_HUMAN	0.997953	-0.000752115	0.0127744	-0.762953	0.0573745	0.762201	Buffering	Scaling	Buffering	Scaling
FAM120A	0.00238945	0.481924	0.212272	-0.406791	0.0277939	0.888716	sp.Q9NZB2.6.F120A_HUMAN	0.0703021	0.273176	0.660187	-0.149151	0.258134	0.422327	Scaling	Scaling	Scaling	Buffering
FAM120B	0.998797	-0.000652678	0.0468142	-0.4687	0.350583	0.468047	sp.Q96EK7.F120B_HUMAN	0.433815	0.53461	0.544115	-0.129006	0.351804	0.663616	Buffering	Scaling	Scaling	Buffering
FAM122A	0.320875	0.0778232	0.0688931	-0.494875	0.0447123	0.572698	sp.Q96E09.F122A_HUMAN	0.616251	0.0989727	0.464541	0.144702	0.841439	-0.0457289	Buffering	Scaling	Buffering	Anti-Scaling
FAM126A	0.173692	0.615869	0.496972	-0.249678	0.109808	0.865547	tr.H7C0W7.H7C0W7_HUMAN	0.523548	0.618772	0.28248	-1.31596	0.172728	1.93473	Scaling	Buffering	Scaling	Scaling
FAM126A	0.173692	0.615869	0.496972	-0.249678	0.109808	0.865547	sp.Q9BYI3.HYCCI_HUMAN	0.574532	0.118413	0.373596	-0.189043	0.225694	0.307456	Scaling	Buffering	Buffering	Buffering
FAM129B	0.00018306	1.58441	0.0838123	1.12863	0.438805	0.455785	sp.Q96TA1.NIBL1_HUMAN	0.0155925	0.767387	0.0965799	0.521914	0.472989	0.245472	Scaling	Anti-Scaling	Scaling	Anti-Scaling
FAM136A	0.457836	0.162337	0.0928642	-0.465357	0.0590743	0.627694	sp.Q96C01.F136A_HUMAN	0.542385	0.267744	0.511075	0.127317	0.750465	0.140427	Buffering	Scaling	Scaling	Anti-Scaling
FAM160B2	0.0824902	0.304327	0.437499	-0.322391	0.158541	0.626718	sp.Q86V87.F16B2_HUMAN	0.508885	0.192309	0.234862	-0.244807	0.192332	0.437117	Scaling	Scaling	Buffering	Buffering
FAM168A	0.588446	-0.123217	0.502625	0.169648	0.352131	-0.292865	sp.Q92567.2.F168A_HUMAN	0.963173	0.0153627	0.472278	-0.199473	0.508172	0.214836	Anti-Scaling	Anti-Scaling	Buffering	Buffering
FAM171A1	0.0570179	1.29061	0.0101313	-1.25228	0.0026969	2.5429	sp.Q5VUB5.F1711_HUMAN	0.389296	0.255211	0.131844	-0.606105	0.0387686	0.861316	Scaling	Scaling	Scaling	Scaling
FAM177A1	0.102167	0.661843	0.948024	0.015249	0.126631	0.646594	sp.Q8N128.2.F177A_HUMAN	0.014061	0.489467	0.828043	0.0861439	0.331975	0.403323	Scaling	Buffering	Scaling	Buffering
FAM192A	0.414705	0.219898	0.00305546	-0.544778	0.0255879	0.764676	sp.Q9GZU8.F192A_HUMAN	0.530012	0.201997	0.249355	-0.273722	0.206582	0.475719	Buffering	Scaling	Buffering	Scaling
FAM206A	0.000370127	0.902838	0.998601	0.000482073	0.0193727	0.902356	sp.Q9NX38.F206A_HUMAN	0.00323891	-0.334017	0.765335	0.136257	0.32834	-0.470275	Scaling	Buffering	Anti-Scaling	Anti-Scaling
FAM208B	0.0362171	0.365422	0.000708392	-0.597815	0.000116501	0.963237	sp.Q5VWN6.F208B_HUMAN	0.627039	0.16467	0.0097684	-0.397927	0.147906	0.562596	Scaling	Scaling	Buffering	Scaling
FAM210A	0.815421	0.0448363	0.326083	-0.381615	0.301674	0.426452	sp.Q96ND0.F210A_HUMAN	0.533459	0.2092	0.392497	-0.241634	0.275578	0.450834	Buffering	Scaling	Buffering	Buffering
FAM219A	0.902165	-0.0788708	0.343671	0.296492	0.589114	-0.375363	sp.Q8IW50.F219A_HUMAN	0.7958	0.202496	0.477523	-0.151407	0.651813	0.353903	Buffering	Anti-Scaling	Buffering	Buffering
FAM221A	0.220843	0.433484	0.35156	-0.663652	0.163007	1.09714	sp.A4D161.F221A_HUMAN	0.343068	0.476022	0.978348	-0.012743	0.390985	0.488765	Scaling	Scaling	Scaling	Buffering
FAM32A	0.101425	0.508041	0.191082	-0.640214	0.0535515	1.14825	sp.Q9Y421.FA32A_HUMAN	0.0690458	0.763491	0.615016	-0.361898	0.199567	1.12539	Scaling	Scaling	Scaling	Scaling
FAM49A	0.26725	-0.696979	0.280887	-0.532366	0.807985	-0.164614	sp.Q9H0Q0.FA49A_HUMAN	0.520846	-0.370902	0.171491	-0.940224	0.441194	0.569322	Anti-Scaling	Scaling	Anti-Scaling	Scaling
FAM76B	0.58472	0.149528	0.0194868	-0.665301	0.0319425	0.814829	sp.Q5HYJ3.FA76B_HUMAN	0.118274	0.409511	0.0239675	-0.755695	0.00490074	1.16521	Buffering	Scaling	Scaling	Scaling
FAM83G	0.104607	0.987249	0.0035978	-1.17912	0.00711598	2.16637	sp.A6ND36.FA83G_HUMAN	0.268216	0.797875	0.035472	-0.66855	0.0881373	1.46643	Scaling	Scaling	Scaling	Scaling
FAM89B	0.0821666	-0.41121	0.908289	0.0319961	0.186269	-0.443206	sp.Q8N5H3.FA89B_HUMAN	0.283691	-0.598048	0.230636	0.28282	0.145959	-0.880868	Anti-Scaling	Buffering	Anti-Scaling	Anti-Scaling
FAM98A	0.115556	0.505346	0.749328	-0.0832078	0.12286	0.588554	sp.Q8NCA5.FA98A_HUMAN	0.588926	0.162517	0.638323	0.125964	0.922368	0.0365529	Scaling	Buffering	Buffering	Anti-Scaling
FAM98C	0.440132	0.264969	0.31243	-0.37094	0.176778	0.635909	sp.Q17RN3.FA98C_HUMAN	0.493697	0.224391	0.281271	0.443177	0.626342	-0.218786	Scaling	Scaling	Buffering	Anti-Scaling
FANCA	0.0657117	-0.518438	0.0510207	-0.714383	0.607918	0.195945	sp.O15360.FANCA_HUMAN	0.759049	-0.438695	0.446663	-0.643268	0.894428	0.204573	Anti-Scaling	Scaling	Anti-Scaling	Scaling
FARP1	0.134676	-1.6219	0.504371	-0.399841	0.28159	-1.22206	sp.Q9Y4F1.FARP1_HUMAN	0.0348987	-1.17878	0.0562472	-0.758587	0.455885	-0.420197	Anti-Scaling	Scaling	Anti-Scaling	Scaling
FARSA	0.473217	0.535573	0.298383	-0.626751	0.206501	1.16232	sp.Q9Y285.SYFA_HUMAN	0.230034	0.386409	0.0687395	-0.239354	0.0991834	0.625763	Scaling	Scaling	Scaling	Buffering
FASTKD5	0.0953935	0.400064	0.0112915	-0.548645	0.00283298	0.948709	sp.Q7L8L6.FAKD5_HUMAN	5.71901e-06	0.987293	0.540503	-0.102852	2.63171e-05	1.09015	Scaling	Scaling	Scaling	Buffering
FAT3	0.00255381	-0.359321	0.152432	-0.21766	0.196975	-0.141661	sp.Q8TDW7.FAT3_HUMAN	0.247707	-1.05545	0.367934	0.429401	0.141688	-1.48485	Anti-Scaling	Buffering	Anti-Scaling	Anti-Scaling
FAU	0.230893	0.362952	0.604576	0.091563	0.404625	0.271389	tr.E9PR30.E9PR30_HUMAN	0.641675	-0.133223	0.2454	-0.221945	0.78045	0.0887218	Scaling	Buffering	Anti-Scaling	Buffering
FBL	0.465223	0.222968	0.759183	0.130854	0.850997	0.0921137	sp.P22087.FBRL_HUMAN	0.365692	0.229582	0.261174	-0.247545	0.13098	0.477127	Buffering	Anti-Scaling	Buffering	Buffering
FBP1	0.0967459	1.65061	0.760646	0.335926	0.341964	1.31468	sp.P09467.F16P1_HUMAN	0.428986	0.610136	0.948059	0.0804257	0.704425	0.52971	Scaling	Anti-Scaling	Scaling	Buffering
FBRS	0.832839	-0.0811583	0.399292	-0.308921	0.650462	0.227762	tr.J3KNZ9.J3KNZ9_HUMAN	0.170125	0.475319	0.792168	-0.0596318	0.143424	0.534951	Buffering	Scaling	Scaling	Buffering
FBXL18	5.0524e-05	0.660366	0.0263246	-0.80314	0.00174993	1.46351	sp.Q96ME1.4.FXL18_HUMAN	0.0475824	0.384633	0.231728	-0.563042	0.078176	0.947676	Scaling	Scaling	Scaling	Scaling
FBXO11	0.263819	0.392115	0.0252901	-0.676002	0.0243514	1.06812	sp.Q86XK2.5.FBX11_HUMAN	0.0682289	0.666749	0.000187463	-0.438591	0.0172871	1.10534	Scaling	Scaling	Scaling	Scaling
FBXO21	0.516774	0.260549	0.302582	-0.598157	0.19575	0.858706	sp.O94952.FBX21_HUMAN	0.323076	-0.218749	0.00014403	-0.366728	0.474913	0.147979	Scaling	Scaling	Anti-Scaling	Scaling
FBXO30	0.896198	-0.0772363	0.0602373	-0.583374	0.447056	0.506138	sp.Q8TB52.FBX30_HUMAN	0.69734	-0.43168	0.639055	-0.0848753	0.754078	-0.346804	Buffering	Scaling	Anti-Scaling	Buffering
FCF1	0.0643782	0.520021	0.29185	-0.386311	0.044606	0.906332	sp.Q9Y324.FCF1_HUMAN	0.030865	0.369362	0.0548394	-0.309436	0.00303279	0.678798	Scaling	Scaling	Scaling	Scaling
FCHSD2	0.0613359	0.41428	0.960116	0.0189919	0.338493	0.395288	sp.O94868.FCSD2_HUMAN	0.730732	-0.0996496	0.666422	0.167506	0.562862	-0.267155	Scaling	Buffering	Buffering	Anti-Scaling
FDFT1	1.44808e-05	1.3093	0.915178	-0.0298654	0.000390388	1.33917	sp.P37268.FDFT_HUMAN	0.11284	0.756651	0.95685	-0.0194871	0.163893	0.776138	Scaling	Buffering	Scaling	Buffering
FDX1	0.607638	0.100362	0.0150567	-0.5569	0.020845	0.657262	sp.P10109.ADX_HUMAN	0.417371	0.188117	0.323676	-0.31194	0.173061	0.500057	Buffering	Scaling	Buffering	Scaling
FEN1	0.327441	0.314767	0.919118	0.0437418	0.595942	0.271025	sp.P39748.FEN1_HUMAN	0.0663639	0.339119	0.94245	0.0173633	0.251374	0.321756	Scaling	Buffering	Scaling	Buffering
FERMT1	0.0137721	1.46594	0.77242	-0.180612	0.0377023	1.64655	sp.Q9BQL6.FERM1_HUMAN	0.00294032	1.34504	0.859639	0.0650436	0.0141998	1.27999	Scaling	Buffering	Scaling	Buffering
FERMT2	0.52984	-0.822152	3.57667e-05	1.48883	0.121525	-2.31098	sp.Q96AC1.3.FERM2_HUMAN	0.792586	-0.221991	0.00188384	0.607299	0.349255	-0.829291	Anti-Scaling	Anti-Scaling	Anti-Scaling	Anti-Scaling
FERMT3	0.656321	0.643551	0.613897	-0.364048	0.518394	1.0076	sp.Q86UX7.URP2_HUMAN	0.928091	0.0837206	0.278538	-0.429317	0.597723	0.513038	Scaling	Scaling	Buffering	Scaling
FEZ2	0.127486	0.727108	0.819497	0.252962	0.682964	0.474147	sp.Q9UHY8.2.FEZ2_HUMAN	0.207641	0.510188	0.182049	0.349034	0.668278	0.161153	Scaling	Anti-Scaling	Scaling	Anti-Scaling
FGD3	0.385968	0.607687	0.55222	-0.425248	0.278464	1.03293	sp.Q5JSP0.FGD3_HUMAN	0.886715	0.184953	0.772862	-0.188135	0.78817	0.373088	Scaling	Scaling	Buffering	Buffering
FGD4	0.0508605	0.706406	0.215459	-0.372075	0.0155231	1.07848	tr.F8VWL3.F8VWL3_HUMAN	0.00746179	0.908736	0.914107	-0.0218098	0.00950969	0.930545	Scaling	Scaling	Scaling	Buffering
FGD6	0.443137	0.419933	0.940788	0.0704526	0.737105	0.34948	sp.Q6ZV73.FGD6_HUMAN	0.982349	0.00479505	0.34958	-0.179298	0.261272	0.184093	Scaling	Buffering	Buffering	Buffering
FGFR1	0.185168	-0.982263	0.201619	-1.20614	0.836408	0.223872	sp.P11362.21.FGFR1_HUMAN	0.32407	-0.396365	0.987354	0.00858289	0.519572	-0.404948	Anti-Scaling	Scaling	Anti-Scaling	Buffering
FGFR1OP	0.00700859	0.358538	0.00692992	-0.787651	0.000793995	1.14619	sp.O95684.2.FR1OP_HUMAN	0.957212	-0.041521	0.750022	-0.0587614	0.982418	0.0172404	Scaling	Scaling	Buffering	Buffering
FGFR1OP2	0.0140503	0.515934	0.641641	-0.346526	0.306555	0.86246	sp.Q9NVK5.FGOP2_HUMAN	0.0558654	0.450346	0.346068	-0.127785	0.0237207	0.578131	Scaling	Scaling	Scaling	Buffering
FHOD1	0.995106	-0.0013955	0.146372	-0.74624	0.164098	0.744845	sp.Q9Y613.FHOD1_HUMAN	0.0885301	0.293164	0.459322	-0.223125	0.122336	0.516289	Buffering	Scaling	Scaling	Buffering
FIBP	0.106631	0.272227	0.728716	0.065987	0.370218	0.20624	sp.O43427.FIBP_HUMAN	0.490157	0.169634	0.132394	-0.198253	0.174059	0.367887	Scaling	Buffering	Buffering	Buffering
FIGNL1	0.201959	0.266988	0.164565	-0.891314	0.0922016	1.1583	sp.Q6PIW4.FIGL1_HUMAN	0.342469	0.138156	0.251691	0.138453	0.998482	-0.000297804	Scaling	Scaling	Buffering	Anti-Scaling
FKBP11	0.0417442	-0.91926	0.180647	-0.903617	0.978656	-0.0156431	sp.Q9NYL4.FKB11_HUMAN	0.21148	-1.19478	0.756121	0.239526	0.210125	-1.43431	Anti-Scaling	Scaling	Anti-Scaling	Anti-Scaling
FKBP14	0.00249785	0.793015	0.230219	-1.56609	0.106391	2.35911	sp.Q9NWM8.FKB14_HUMAN	0.16823	0.396142	0.310636	-0.987433	0.184863	1.38358	Scaling	Scaling	Scaling	Scaling
FKBP15	0.0100342	0.543517	0.635571	-0.139661	0.0637825	0.683178	sp.Q5T1M5.FKB15_HUMAN	0.366373	0.12582	0.588251	0.1401	0.957951	-0.0142809	Scaling	Buffering	Buffering	Anti-Scaling
FKBP1A	0.0344901	0.348882	0.819537	-0.0534738	0.13781	0.402356	tr.Q5W0X3.Q5W0X3_HUMAN	0.549794	-0.10457	0.670041	-0.130469	0.93564	0.0258994	Scaling	Buffering	Anti-Scaling	Buffering
FKBP2	0.493721	0.23414	0.260758	0.245232	0.976609	-0.0110922	sp.P26885.FKBP2_HUMAN	0.554878	0.256928	0.64818	-0.0862711	0.45802	0.343199	Buffering	Anti-Scaling	Scaling	Buffering
FKBP3	0.0257818	0.685351	0.0564556	-0.37629	0.00329104	1.06164	sp.Q00688.FKBP3_HUMAN	0.398355	0.503178	0.00271487	-1.01187	0.0420318	1.51505	Scaling	Scaling	Scaling	Scaling
FKBP4	0.00164053	0.761906	0.762977	-0.111093	0.0788869	0.872999	sp.Q02790.FKBP4_HUMAN	0.000678099	0.658216	0.192182	-0.492145	0.0271164	1.15036	Scaling	Buffering	Scaling	Scaling
FKBP8	0.00459604	0.519599	0.166292	-0.723249	0.0616649	1.24285	sp.Q14318.2.FKBP8_HUMAN	0.452258	-0.313435	0.508172	-0.309218	0.993836	-0.00421735	Scaling	Scaling	Anti-Scaling	Scaling
FKBP9	0.100966	0.920796	0.0776296	-2.92383	0.0334245	3.84463	sp.O95302.FKBP9_HUMAN	0.0152878	0.765362	0.138573	-1.25194	0.0402165	2.01731	Scaling	Scaling	Scaling	Scaling
FKRP	0.111673	0.666646	0.16527	0.343316	0.427938	0.32333	sp.Q9H9S5.FKRP_HUMAN	0.0454842	0.784987	0.544141	-0.204073	0.0507851	0.98906	Scaling	Anti-Scaling	Scaling	Buffering
FLCN	0.586538	0.385952	0.00211268	-0.661976	0.217324	1.04793	sp.Q8NFG4.FLCN_HUMAN	0.626963	0.159396	0.33164	-0.374516	0.271706	0.533912	Scaling	Scaling	Buffering	Scaling
FLI1	0.713046	0.371239	0.8715	-0.129822	0.679753	0.501061	sp.Q01543.FLI1_HUMAN	0.41746	-0.696615	0.535247	-0.403775	0.757456	-0.29284	Scaling	Buffering	Anti-Scaling	Scaling
FLII	0.290511	0.625863	6.27639e-05	-1.15994	0.039527	1.7858	sp.Q13045.2.FLII_HUMAN	0.902691	0.0176015	0.361771	-0.380881	0.347338	0.398483	Scaling	Scaling	Buffering	Scaling
FLII	0.290511	0.625863	6.27639e-05	-1.15994	0.039527	1.7858	sp.Q13045.3.FLII_HUMAN	0.626825	0.0572701	0.237342	-0.341134	0.183857	0.398404	Scaling	Scaling	Buffering	Scaling
FLRT2	0.00051406	-1.03277	0.649054	0.333385	0.0910997	-1.36615	sp.O43155.FLRT2_HUMAN	0.0399431	-1.49825	0.618687	0.492303	0.103251	-1.99055	Anti-Scaling	Anti-Scaling	Anti-Scaling	Anti-Scaling
FLRT3	0.481495	0.546412	0.891401	-0.0676867	0.484006	0.614098	sp.Q9NZU0.FLRT3_HUMAN	0.626362	-0.299404	0.550657	-0.410756	0.894654	0.111352	Scaling	Buffering	Anti-Scaling	Scaling
FLYWCH1	0.561248	-0.424869	0.014683	-0.745936	0.663193	0.321067	sp.Q4VC44.FWCH1_HUMAN	0.0963154	0.714213	0.161482	-0.361051	0.0268697	1.07526	Anti-Scaling	Scaling	Scaling	Scaling
FLYWCH2	0.978878	0.00814814	0.108415	-0.524439	0.214126	0.532587	sp.Q96CP2.FWCH2_HUMAN	0.000930283	-1.00424	0.391707	-0.400186	0.209182	-0.60405	Buffering	Scaling	Anti-Scaling	Scaling
FMNL3	0.0108441	-1.27586	0.847315	-0.176741	0.30372	-1.09912	sp.Q8IVF7.FMNL3_HUMAN	0.0366276	-0.938931	0.314874	-0.539412	0.466317	-0.399519	Anti-Scaling	Buffering	Anti-Scaling	Scaling
FNBP1	0.976023	0.0259136	0.226972	0.294819	0.75602	-0.268906	sp.Q96RU3.2.FNBP1_HUMAN	0.878312	0.0695758	0.329182	0.526701	0.477931	-0.457126	Buffering	Anti-Scaling	Buffering	Anti-Scaling
FNDC3A	0.486902	-0.228745	0.0661998	-0.397874	0.641672	0.169129	sp.Q9Y2H6.FND3A_HUMAN	0.490323	-0.224692	0.0222337	-0.631658	0.29451	0.406965	Anti-Scaling	Scaling	Anti-Scaling	Scaling
FNTA	0.00256182	0.56262	0.805476	0.0701685	0.132914	0.492452	sp.P49354.FNTA_HUMAN	0.313906	0.306375	0.983236	0.00458188	0.397755	0.301793	Scaling	Buffering	Scaling	Buffering
FNTB	0.0401226	0.390033	0.836942	-0.109223	0.369166	0.499256	sp.P49356.FNTB_HUMAN	0.495069	0.177122	0.456662	-0.158331	0.277176	0.335454	Scaling	Buffering	Buffering	Buffering
FOCAD	0.879093	0.0608057	0.229012	-0.335566	0.391658	0.396372	sp.Q5VW36.FOCAD_HUMAN	0.478452	0.233573	0.874794	0.0258218	0.541521	0.207751	Buffering	Scaling	Buffering	Buffering
FOLR1	0.53705	0.641456	0.749147	-0.204675	0.467323	0.846131	sp.P15328.FOLR1_HUMAN	0.332486	1.32277	0.774704	0.264647	0.495797	1.05812	Scaling	Buffering	Scaling	Anti-Scaling
FOSL1	0.923795	0.144637	0.142208	1.51638	0.433755	-1.37174	sp.P15407.FOSL1_HUMAN	0.55186	0.639497	0.94616	0.0514613	0.640927	0.588035	Buffering	Anti-Scaling	Scaling	Buffering
FOSL2	0.257834	1.10416	0.864257	0.200657	0.524078	0.903505	sp.P15408.FOSL2_HUMAN	0.187859	0.814202	0.68216	-0.247196	0.184765	1.0614	Scaling	Anti-Scaling	Scaling	Buffering
FOXA1	0.690571	0.434931	0.00149841	-1.47954	0.128349	1.91447	sp.P55317.FOXA1_HUMAN	0.663631	0.444571	0.623161	-0.275904	0.502727	0.720476	Scaling	Scaling	Scaling	Scaling
FOXA2	0.148133	1.06124	0.114744	-0.493648	0.0469931	1.55489	sp.Q9Y261.2.FOXA2_HUMAN	0.518599	0.727629	0.405177	0.886134	0.905468	-0.158505	Scaling	Scaling	Scaling	Anti-Scaling
FOXJ2	0.4032	-0.237332	0.352587	-0.491516	0.630916	0.254184	sp.Q9P0K8.FOXJ2_HUMAN	0.516916	0.226266	0.818082	-0.199334	0.642023	0.4256	Anti-Scaling	Scaling	Buffering	Buffering
FOXK1	0.104191	0.213201	0.00117408	-0.822256	9.83588e-05	1.03546	sp.P85037.FOXK1_HUMAN	0.278289	0.131285	0.0231021	-0.419562	0.00547534	0.550847	Buffering	Scaling	Buffering	Scaling
FOXO1	0.362369	-0.588073	0.00586192	-1.06492	0.484395	0.476844	sp.Q12778.FOXO1_HUMAN	0.817933	0.225079	0.0395573	-1.05725	0.245779	1.28233	Anti-Scaling	Scaling	Buffering	Scaling
FOXO3	0.625265	0.229059	0.802488	-0.0686003	0.562713	0.297659	sp.O43524.FOXO3_HUMAN	0.793025	0.20163	0.854028	0.0458971	0.842283	0.155733	Buffering	Buffering	Buffering	Buffering
FOXRED1	0.0803946	0.406809	0.0024555	-0.767621	0.000648241	1.17443	sp.Q96CU9.FXRD1_HUMAN	0.0158441	0.422382	0.116765	-0.3787	0.00662977	0.801082	Scaling	Scaling	Scaling	Scaling
FPGS	0.000998182	0.509597	0.131669	-0.37561	0.00717061	0.885206	sp.Q05932.2.FOLC_HUMAN	0.292719	0.184549	0.851366	-0.0520866	0.442087	0.236636	Scaling	Scaling	Buffering	Buffering
FREM2	0.412317	-0.311602	0.693855	0.142534	0.351742	-0.454136	sp.Q5SZK8.FREM2_HUMAN	0.570011	-0.313306	0.633812	-0.142413	0.764784	-0.170893	Anti-Scaling	Anti-Scaling	Anti-Scaling	Buffering
FRMD4A	0.336805	0.779105	0.525852	0.34597	0.625978	0.433135	sp.Q9P2Q2.FRM4A_HUMAN	0.123295	0.876108	0.434352	0.153867	0.19134	0.722241	Scaling	Anti-Scaling	Scaling	Anti-Scaling
FRMD6	0.196646	-1.22118	0.000321045	2.91753	0.00273619	-4.13871	sp.Q96NE9.2.FRMD6_HUMAN	0.567302	-0.516362	0.0358001	1.56503	0.0776242	-2.08139	Anti-Scaling	Anti-Scaling	Anti-Scaling	Anti-Scaling
FRMD8	0.710273	-0.071375	0.640421	0.100821	0.487553	-0.172196	sp.Q9BZ67.FRMD8_HUMAN	0.216697	0.28291	0.0440025	0.448389	0.54072	-0.165479	Buffering	Anti-Scaling	Scaling	Anti-Scaling
FRY	0.185685	1.32963	0.323275	0.342635	0.324644	0.986996	sp.Q5TBA9.FRY_HUMAN	0.375715	1.04159	0.975259	-0.00453652	0.374014	1.04613	Scaling	Anti-Scaling	Scaling	Buffering
FSCN1	0.633478	0.28855	0.369229	-1.27236	0.296641	1.56091	sp.Q16658.FSCN1_HUMAN	0.956935	0.0179818	0.335469	-0.793946	0.335613	0.811928	Scaling	Scaling	Buffering	Scaling
FTH1	0.535834	-0.28885	0.454929	0.616586	0.323955	-0.905437	sp.P02794.FRIH_HUMAN	0.547236	0.246627	0.565313	-0.16272	0.383742	0.409347	Anti-Scaling	Anti-Scaling	Buffering	Buffering
FTL	0.0889549	1.55271	0.812465	-0.270606	0.211248	1.82331	sp.P02792.FRIL_HUMAN	0.153536	1.2389	0.844702	-0.211192	0.285627	1.45009	Scaling	Scaling	Scaling	Buffering
FTO	0.6474	-0.0888067	0.0218177	-0.801214	0.0479061	0.712407	sp.Q9C0B1.FTO_HUMAN	0.588319	0.149974	0.00247159	-0.555943	0.0370148	0.705917	Buffering	Scaling	Buffering	Scaling
FUBP3	0.125191	0.328541	0.224276	-0.164079	0.044866	0.49262	sp.Q96I24.FUBP3_HUMAN	0.296905	0.252837	0.698073	0.0882209	0.593564	0.164616	Scaling	Buffering	Scaling	Buffering
FUCA2	0.206291	0.849466	0.180104	-1.30363	0.0565892	2.15309	sp.Q9BTY2.FUCO2_HUMAN	0.149856	1.03784	0.0347935	-0.767558	0.0345274	1.80539	Scaling	Scaling	Scaling	Scaling
FUK	0.351361	-0.415267	0.0951429	-0.557161	0.7791	0.141894	sp.Q8N0W3.2.FUK_HUMAN	0.242457	-0.376541	0.680677	-0.0902432	0.414751	-0.286298	Anti-Scaling	Scaling	Anti-Scaling	Buffering
FUS	0.264298	-0.142772	0.107004	-0.413021	0.285	0.270249	sp.P35637.FUS_HUMAN	0.0188716	-0.187257	0.953935	0.0100099	0.250815	-0.197267	Anti-Scaling	Scaling	Anti-Scaling	Buffering
FUT8	0.74659	0.332652	0.746445	0.123071	0.844805	0.20958	sp.Q9BYC5.FUT8_HUMAN	0.737501	0.191065	0.298603	0.36455	0.785964	-0.173486	Scaling	Anti-Scaling	Buffering	Anti-Scaling
FXN	0.169941	-0.401973	0.0713144	-0.90111	0.299047	0.499136	sp.Q16595.FRDA_HUMAN	0.676087	0.0864247	0.063383	-0.537055	0.0526871	0.623479	Anti-Scaling	Scaling	Buffering	Scaling
FXR2	0.969626	0.0181033	0.0193967	-0.596144	0.278632	0.614248	sp.P51116.FXR2_HUMAN	0.381052	0.273185	0.0663377	-0.376154	0.0923663	0.64934	Buffering	Scaling	Scaling	Scaling
FYN	0.858688	-0.147724	0.327544	0.762028	0.39437	-0.909751	sp.P06241.FYN_HUMAN	0.568903	-0.275613	0.762767	0.0735118	0.498307	-0.349125	Anti-Scaling	Anti-Scaling	Anti-Scaling	Buffering
GAB2	0.017991	-1.13337	0.166489	-0.940493	0.783968	-0.192879	sp.Q9UQC2.GAB2_HUMAN	0.129272	-0.763604	0.0202733	-0.782107	0.970288	0.0185032	Anti-Scaling	Scaling	Anti-Scaling	Scaling
GABARAPL1	0.779561	0.160357	0.50266	-1.30333	0.462605	1.46369	sp.Q9H0R8.2.GBRL1_HUMAN	0.416105	0.23263	0.581196	0.277265	0.933052	-0.0446357	Buffering	Scaling	Buffering	Anti-Scaling
GABARAPL2	0.0160513	0.68128	0.0172453	-0.475374	0.000856913	1.15665	sp.P60520.GBRL2_HUMAN	0.771035	0.131528	0.215655	-0.350923	0.342181	0.482451	Scaling	Scaling	Buffering	Scaling
GADD45GIP1	0.0269367	0.254019	0.0553086	-0.378569	0.0137023	0.632588	sp.Q8TAE8.G45IP_HUMAN	0.79796	0.0965702	0.763954	-0.138649	0.674601	0.235219	Scaling	Scaling	Buffering	Buffering
GALC	0.198785	1.97239	0.622188	-0.322558	0.157382	2.29495	sp.P54803.GALC_HUMAN	0.113244	1.27997	0.29291	-0.745274	0.0464035	2.02525	Scaling	Scaling	Scaling	Scaling
GALM	0.331661	1.086	0.58072	-0.555545	0.250655	1.64154	sp.Q96C23.GALM_HUMAN	0.530048	0.579797	0.73358	-0.458092	0.509292	1.03789	Scaling	Scaling	Scaling	Scaling
GALNS	0.157721	-0.40511	0.0588692	-0.552215	0.66852	0.147104	sp.P34059.GALNS_HUMAN	0.690295	0.0981155	0.0875215	-0.315846	0.150355	0.413962	Anti-Scaling	Scaling	Buffering	Scaling
GALNT12	0.000700987	2.45066	0.515413	-0.636554	0.0205357	3.08721	sp.Q8IXK2.GLT12_HUMAN	0.0189843	1.00772	0.523568	-0.476733	0.0949306	1.48446	Scaling	Scaling	Scaling	Scaling
GALT	0.202086	0.386405	0.387366	-0.207127	0.100655	0.593532	sp.P07902.GALT_HUMAN	0.724476	-0.0881157	0.0874785	-0.505479	0.236095	0.417364	Scaling	Buffering	Buffering	Scaling
GAMT	0.135977	1.29523	0.494654	0.226901	0.19019	1.06833	sp.Q14353.GAMT_HUMAN	0.535516	1.23101	0.232391	0.703797	0.784089	0.527215	Scaling	Anti-Scaling	Scaling	Anti-Scaling
GAN	0.806908	0.0487094	0.279154	-0.25815	0.293815	0.306859	sp.Q9H2C0.GAN_HUMAN	0.190696	0.353075	0.702491	-0.0910846	0.187861	0.44416	Buffering	Scaling	Scaling	Buffering
GANAB	0.874712	-0.0426486	0.350456	0.267326	0.405817	-0.309975	sp.Q14697.2.GANAB_HUMAN	0.877659	0.0505384	0.874135	0.0374847	0.973047	0.0130538	Buffering	Anti-Scaling	Buffering	Buffering
GAPDH	0.0544159	0.432565	0.00528258	-0.466416	0.00092342	0.898982	sp.P04406.G3P_HUMAN	0.0979789	0.379265	0.00359454	-0.597458	0.000708223	0.976724	Scaling	Scaling	Scaling	Scaling
GAPDHS	0.10827	-0.0548492	0.444731	0.929469	0.422655	-0.984318	sp.O14556.G3PT_HUMAN	0.912648	-0.0249856	0.182334	0.698783	0.162946	-0.723769	Buffering	Anti-Scaling	Buffering	Anti-Scaling
GAPVD1	0.161331	0.251884	0.865665	0.0193865	0.225937	0.232497	sp.Q14C86.6.GAPD1_HUMAN	0.976898	-0.00741307	0.841204	0.0665976	0.853564	-0.0740107	Scaling	Buffering	Buffering	Buffering
GARS	0.328046	0.173627	0.096427	-0.826639	0.0558256	1.00027	sp.P41250.SYG_HUMAN	0.646704	0.067442	0.0850991	-0.701028	0.0634361	0.76847	Buffering	Scaling	Buffering	Scaling
GAS6	0.840696	-0.217655	0.714576	0.331138	0.682732	-0.548793	sp.Q14393.2.GAS6_HUMAN	0.638494	-0.242015	0.380801	0.591717	0.305373	-0.833732	Anti-Scaling	Anti-Scaling	Anti-Scaling	Anti-Scaling
GATA3	0.189539	-0.523415	0.462919	0.331387	0.12568	-0.854802	sp.P23771.2.GATA3_HUMAN	0.580319	-0.275275	0.809015	0.387798	0.678234	-0.663073	Anti-Scaling	Anti-Scaling	Anti-Scaling	Anti-Scaling
GATAD2A	0.900065	-0.0462434	0.647255	-0.357619	0.704253	0.311376	sp.Q86YP4.3.P66A_HUMAN	0.970097	0.0351116	0.734024	-0.263757	0.794085	0.298868	Buffering	Scaling	Buffering	Scaling
GATC	0.00757134	0.528092	0.0500527	-0.281057	0.00159565	0.809149	sp.O43716.GATC_HUMAN	0.7125	0.0831782	0.983299	-0.0146296	0.891472	0.0978078	Scaling	Scaling	Buffering	Buffering
GBA2	0.221724	0.473974	0.103722	-0.393025	0.0581785	0.866998	sp.Q9HCG7.GBA2_HUMAN	0.577843	0.199217	0.311371	-0.233847	0.292838	0.433064	Scaling	Scaling	Buffering	Buffering
GCDH	0.276843	0.582631	0.795133	-0.184672	0.3664	0.767304	sp.Q92947.GCDH_HUMAN	0.124554	0.707294	0.736051	0.22745	0.516602	0.479844	Scaling	Buffering	Scaling	Anti-Scaling
GCFC2	0.405537	0.312736	0.88846	0.0490642	0.579327	0.263672	sp.P16383.GCFC2_HUMAN	0.214762	0.321898	0.598213	0.0825781	0.369505	0.23932	Scaling	Buffering	Scaling	Buffering
GCSH	0.0466607	0.696679	0.00231423	-0.857524	0.000878924	1.5542	sp.P23434.GCSH_HUMAN	0.0521917	0.409265	0.00187977	-0.715087	0.000325946	1.12435	Scaling	Scaling	Scaling	Scaling
GDA	0.810378	0.232683	0.791815	-0.313272	0.709105	0.545955	sp.Q9Y2T3.3.GUAD_HUMAN	0.950611	-0.0470648	0.114816	-1.14476	0.257209	1.0977	Buffering	Scaling	Buffering	Scaling
GDF15	7.06045e-06	-4.20917	0.81333	-0.549542	0.211373	-3.65963	sp.Q99988.GDF15_HUMAN	0.194513	-1.65085	0.59832	0.454592	0.139213	-2.10544	Anti-Scaling	Scaling	Anti-Scaling	Anti-Scaling
GDI2	0.593814	0.147784	1.4633e-10	-1.01048	0.00803739	1.15826	sp.P50395.GDIB_HUMAN	0.384379	0.329609	0.000281394	-0.652503	0.0372803	0.982112	Buffering	Scaling	Scaling	Scaling
GEMIN2	7.98104e-06	0.711099	0.011079	-0.919224	0.000513937	1.63032	sp.O14893.GEMI2_HUMAN	0.139355	0.749243	0.00127478	-0.715425	0.0194056	1.46467	Scaling	Scaling	Scaling	Scaling
GEMIN4	0.616769	-0.369632	0.00245474	-0.496169	0.860439	0.126538	sp.P57678.GEMI4_HUMAN	0.244836	0.408177	0.860753	0.0316954	0.283136	0.376481	Anti-Scaling	Scaling	Scaling	Buffering
GEMIN6	0.0305204	0.48646	0.562324	-0.190458	0.0976644	0.676918	sp.Q8WXD5.GEMI6_HUMAN	0.454574	0.16741	0.636113	0.306941	0.832071	-0.139531	Scaling	Buffering	Buffering	Anti-Scaling
GEMIN7	0.0069989	0.671627	0.308705	0.419862	0.522036	0.251765	sp.Q9H840.GEMI7_HUMAN	0.780694	-0.0643619	0.94415	-0.0301819	0.941572	-0.03418	Scaling	Anti-Scaling	Buffering	Buffering
GET4	9.78175e-05	0.435802	0.0388982	-0.6166	0.00603061	1.0524	sp.Q7L5D6.GET4_HUMAN	0.401836	0.155063	0.765153	-0.158804	0.573742	0.313867	Scaling	Scaling	Buffering	Buffering
GFER	0.108738	0.501141	0.0373178	-0.599053	0.00674597	1.10019	sp.P55789.ALR_HUMAN	0.407978	0.545491	0.0141882	-0.706017	0.123758	1.25151	Scaling	Scaling	Scaling	Scaling
GFOD2	0.400794	0.230491	0.00529834	-0.755282	0.0101759	0.985774	sp.Q3B7J2.GFOD2_HUMAN	0.00390029	0.365331	0.0124543	-0.869803	0.00348016	1.23513	Buffering	Scaling	Scaling	Scaling
GFPT1	0.0199422	0.618628	0.802608	0.0554367	0.0653782	0.563191	sp.Q06210.GFPT1_HUMAN	0.895237	0.0456024	0.762602	-0.0887106	0.751395	0.134313	Scaling	Buffering	Buffering	Buffering
GGA2	0.338102	-0.708534	0.064041	-0.860233	0.83626	0.151699	sp.Q9UJY4.GGA2_HUMAN	0.599773	-0.818264	0.0161092	-0.391912	0.778475	-0.426352	Anti-Scaling	Scaling	Anti-Scaling	Scaling
GGACT	0.0737725	0.642642	0.930662	0.0311013	0.185015	0.61154	sp.Q9BVM4.GGACT_HUMAN	0.00542794	1.10476	0.516862	-0.378355	0.0277551	1.48312	Scaling	Buffering	Scaling	Scaling
GGCT	0.000155252	0.490326	0.0246454	-0.942389	0.00512919	1.43272	sp.O75223.GGCT_HUMAN	0.182531	0.283649	0.630184	-0.134422	0.196701	0.418071	Scaling	Scaling	Scaling	Buffering
GGCX	0.00206936	0.510203	0.844289	0.0592264	0.197601	0.450977	sp.P38435.VKGC_HUMAN	0.0246237	1.02703	0.153443	0.602475	0.349282	0.424552	Scaling	Buffering	Scaling	Anti-Scaling
GID4	0.199479	0.555502	0.00911569	-0.402449	0.0671025	0.957951	sp.Q8IVV7.GID4_HUMAN	0.218731	0.306796	0.0292064	-0.407986	0.0307178	0.714782	Scaling	Scaling	Scaling	Scaling
GINM1	0.828307	0.185353	0.0466283	-0.850865	0.301371	1.03622	sp.Q9NU53.GINM1_HUMAN	0.93267	-0.0723785	0.423679	-0.717938	0.581063	0.645559	Buffering	Scaling	Buffering	Scaling
GINS1	0.642512	0.149747	0.134948	-0.502855	0.142492	0.652602	sp.Q14691.PSF1_HUMAN	0.786913	-0.0825542	0.437707	-0.207895	0.738612	0.125341	Buffering	Scaling	Buffering	Buffering
GINS2	0.426901	-0.165163	0.00114645	-0.488698	0.140695	0.323535	sp.Q9Y248.PSF2_HUMAN	0.460047	-0.167488	0.838582	-0.0640078	0.765298	-0.10348	Anti-Scaling	Scaling	Anti-Scaling	Buffering
GINS3	0.666669	0.079242	0.0231655	-0.623764	0.0215263	0.703006	sp.Q9BRX5.PSF3_HUMAN	0.64749	0.113428	0.761969	0.0731671	0.894166	0.0402609	Buffering	Scaling	Buffering	Buffering
GINS4	0.143366	0.393278	0.75245	-0.127799	0.26256	0.521078	sp.Q9BRT9.SLD5_HUMAN	0.00278157	0.494597	0.328939	0.306	0.550666	0.188598	Scaling	Buffering	Scaling	Anti-Scaling
GIPC1	1.41153e-06	-2.38337	0.667578	-0.722776	0.370007	-1.6606	sp.O14908.GIPC1_HUMAN	0.0280805	-1.36579	0.498445	-0.392603	0.169529	-0.97319	Anti-Scaling	Scaling	Anti-Scaling	Scaling
GIT2	0.723108	-0.0823918	0.275722	0.25396	0.264162	-0.336352	sp.Q14161.GIT2_HUMAN	0.344858	-0.549691	0.709708	-0.237461	0.690779	-0.31223	Buffering	Anti-Scaling	Anti-Scaling	Buffering
GLB1L2	0.507328	-0.576055	0.244002	-0.858262	0.785759	0.282207	sp.Q8IW92.GLBL2_HUMAN	0.933852	0.0765493	0.81637	-0.145608	0.831172	0.222157	Anti-Scaling	Scaling	Buffering	Buffering
GLCCI1	0.706984	0.106449	0.708504	0.180832	0.883452	-0.0743823	sp.Q86VQ1.GLCI1_HUMAN	0.638531	-0.158149	0.684048	0.241444	0.531588	-0.399593	Buffering	Anti-Scaling	Anti-Scaling	Anti-Scaling
GLDC	0.812873	-0.458156	0.567385	-0.321103	0.944364	-0.137052	sp.P23378.GCSP_HUMAN	0.501263	-0.668096	0.00667408	-0.918051	0.796335	0.249955	Anti-Scaling	Scaling	Anti-Scaling	Scaling
GLE1	0.00880207	0.535988	0.302667	-0.264139	0.018538	0.800127	sp.Q53GS7.GLE1_HUMAN	0.229007	0.151226	0.843589	-0.0231126	0.271022	0.174339	Scaling	Scaling	Buffering	Buffering
GLG1	0.620889	0.142499	0.418382	-0.245321	0.32683	0.387819	sp.Q92896.2.GSLG1_HUMAN	0.658748	0.178112	0.415254	-0.136919	0.451188	0.315031	Buffering	Buffering	Buffering	Buffering
GLIPR2	0.86417	0.183082	0.684392	-0.185116	0.743022	0.368198	sp.Q9H4G4.GAPR1_HUMAN	0.637251	0.3871	0.897226	-0.0571686	0.613451	0.444268	Buffering	Buffering	Scaling	Buffering
GLOD4	0.168741	-0.246417	0.0514437	-0.416327	0.456568	0.16991	sp.Q9HC38.2.GLOD4_HUMAN	0.0193214	-0.376867	0.568799	-0.162912	0.453332	-0.213955	Anti-Scaling	Scaling	Anti-Scaling	Buffering
GLRX5	0.00240881	0.365504	0.014144	-0.85081	0.00238401	1.21631	sp.Q86SX6.GLRX5_HUMAN	0.486125	0.29512	0.0406169	-1.09121	0.0342122	1.38633	Scaling	Scaling	Scaling	Scaling
GLTP	0.185314	0.617808	0.797068	-0.191011	0.350653	0.808819	sp.Q9NZD2.GLTP_HUMAN	0.0961826	-0.13932	0.643124	0.301772	0.510943	-0.441092	Scaling	Buffering	Anti-Scaling	Anti-Scaling
GLYR1	0.162916	-0.259053	0.167404	-0.41399	0.609008	0.154938	sp.Q49A26.GLYR1_HUMAN	0.00881796	0.346257	0.547152	-0.111106	0.0234635	0.457362	Anti-Scaling	Scaling	Scaling	Buffering
GMFB	0.12805	0.624118	0.903144	0.0202595	0.143709	0.603859	sp.P60983.GMFB_HUMAN	0.948314	-0.0226596	0.0149336	-0.931399	0.0600032	0.90874	Scaling	Buffering	Buffering	Scaling
GMFG	0.941714	-0.118265	0.654255	1.03595	0.664567	-1.15421	sp.O60234.GMFG_HUMAN	0.185269	-1.34125	0.614171	0.84371	0.26568	-2.18496	Anti-Scaling	Anti-Scaling	Anti-Scaling	Anti-Scaling
GMIP	0.00503976	2.2273	0.892542	-0.135808	0.107749	2.36311	sp.Q9P107.GMIP_HUMAN	0.00509753	2.37625	0.678385	-0.354477	0.0523688	2.73073	Scaling	Buffering	Scaling	Scaling
GMPR2	0.025159	0.798245	0.173451	-0.461794	0.00757565	1.26004	sp.Q9P2T1.2.GMPR2_HUMAN	0.423687	0.279519	0.140075	-0.42872	0.109778	0.70824	Scaling	Scaling	Scaling	Scaling
GNA11	0.0178409	-1.83615	0.392187	-0.872034	0.357814	-0.96412	sp.P29992.GNA11_HUMAN	0.221274	-1.1621	0.364303	-0.603155	0.546352	-0.558942	Anti-Scaling	Scaling	Anti-Scaling	Scaling
GNA12	0.215529	0.27109	0.985262	-0.00284651	0.235891	0.273936	sp.Q03113.GNA12_HUMAN	0.0837461	0.266933	0.965742	-0.0151154	0.459626	0.282048	Scaling	Buffering	Scaling	Buffering
GNAO1	0.00575468	-0.526027	0.000324385	-0.591111	0.576222	0.0650837	sp.P09471.GNAO_HUMAN	0.508272	-0.229777	0.166323	-0.810179	0.328182	0.580401	Anti-Scaling	Scaling	Anti-Scaling	Scaling
GNAQ	0.179864	0.439008	0.651471	0.107423	0.32642	0.331584	sp.P50148.GNAQ_HUMAN	0.139798	0.532132	0.625284	0.210969	0.524662	0.321164	Scaling	Anti-Scaling	Scaling	Anti-Scaling
GNB3	0.245834	0.597743	0.831146	0.212255	0.721487	0.385488	sp.P16520.GBB3_HUMAN	0.679698	0.0937799	0.892905	-0.0781382	0.777749	0.171918	Scaling	Anti-Scaling	Buffering	Buffering
GNE	0.00494864	1.63196	0.855801	0.0594158	0.00296022	1.57254	sp.Q9Y223.2.GLCNE_HUMAN	0.0648589	1.19497	0.945681	-0.0192509	0.0563993	1.21422	Scaling	Buffering	Scaling	Buffering
GNG10	0.12707	0.771716	0.828048	0.0951173	0.269627	0.676599	sp.P50151.GBG10_HUMAN	0.136378	1.25146	0.968823	0.0206848	0.164393	1.23078	Scaling	Buffering	Scaling	Buffering
GNG2	0.810018	-0.401257	0.90993	-0.109469	0.875235	-0.291788	tr.G3V2N0.G3V2N0_HUMAN	0.52111	-1.90497	0.117628	-1.16069	0.794094	-0.74428	Anti-Scaling	Buffering	Anti-Scaling	Scaling
GNPNAT1	0.146626	0.778348	0.0408468	-0.507168	0.0372192	1.28552	sp.Q96EK6.GNA1_HUMAN	0.12322	0.768607	0.0170942	-0.845916	0.0104565	1.61452	Scaling	Scaling	Scaling	Scaling
GNPTAB	0.503544	0.441043	0.223061	-0.723297	0.164838	1.16434	sp.Q3T906.GNPTA_HUMAN	0.334384	0.440018	0.843398	-0.115466	0.433635	0.555483	Scaling	Scaling	Scaling	Buffering
GNPTG	0.489975	0.29136	0.361985	-0.248191	0.27038	0.539551	sp.Q9UJJ9.GNPTG_HUMAN	0.328469	0.505206	0.756192	-0.100905	0.28297	0.606112	Scaling	Buffering	Scaling	Buffering
GNS	0.158695	0.753422	0.602055	0.495379	0.793224	0.258042	sp.P15586.GNS_HUMAN	0.0221321	1.02603	0.621688	0.420955	0.499726	0.60507	Scaling	Anti-Scaling	Scaling	Anti-Scaling
GOLGA1	0.001632	0.68154	0.852587	-0.0413683	0.0191053	0.722908	sp.Q92805.GOGA1_HUMAN	0.00309054	0.66598	0.668394	0.146012	0.174125	0.519968	Scaling	Buffering	Scaling	Anti-Scaling
GOLGA2	0.0137175	0.709595	0.00763208	0.66129	0.851498	0.0483048	tr.H0Y7B8.H0Y7B8_HUMAN	0.9041	0.0416685	0.77488	-0.115754	0.752033	0.157423	Scaling	Anti-Scaling	Buffering	Buffering
GOLGA2	0.0137175	0.709595	0.00763208	0.66129	0.851498	0.0483048	sp.Q08379.GOGA2_HUMAN	0.130673	0.331828	0.1615	0.208323	0.578768	0.123505	Scaling	Anti-Scaling	Scaling	Anti-Scaling
GOLGA3	0.316189	0.424505	0.672324	0.235286	0.765934	0.18922	sp.Q08378.GOGA3_HUMAN	0.0301567	0.796414	0.95546	0.0148861	0.0606389	0.781528	Scaling	Anti-Scaling	Scaling	Buffering
GOLGA5	4.24598e-08	0.853749	0.936362	0.0172553	0.00485527	0.836494	sp.Q8TBA6.GOGA5_HUMAN	0.128519	0.608987	0.972046	0.00629498	0.139964	0.602692	Scaling	Buffering	Scaling	Buffering
GOLGA7	0.0570565	0.371693	0.950888	-0.0155631	0.209455	0.387256	sp.Q7Z5G4.GOGA7_HUMAN	0.137337	-0.346599	0.233552	0.164	0.0489912	-0.510599	Scaling	Buffering	Anti-Scaling	Anti-Scaling
GOLM1	0.102054	0.922139	0.856168	-0.181064	0.325734	1.1032	sp.Q8NBJ4.GOLM1_HUMAN	0.0458799	1.00732	0.876391	-0.164977	0.317469	1.1723	Scaling	Buffering	Scaling	Buffering
GOLT1B	0.38668	0.208513	0.539458	-0.508828	0.411382	0.717341	sp.Q9Y3E0.GOT1B_HUMAN	0.643934	0.0662393	0.681021	-0.202735	0.594624	0.268974	Buffering	Scaling	Buffering	Buffering
GOPC	0.28728	0.324409	0.00893141	-0.707423	0.0171799	1.03183	sp.Q9HD26.GOPC_HUMAN	0.789826	-0.1466	0.097148	-0.527166	0.53399	0.380567	Scaling	Scaling	Anti-Scaling	Scaling
GOT2	0.274656	0.246686	0.00082295	-0.960357	0.000812006	1.20704	sp.P00505.AATM_HUMAN	5.01196e-09	0.612168	0.00251534	-0.750055	5.54457e-05	1.36222	Buffering	Scaling	Scaling	Scaling
GPALPP1	0.0356012	0.397627	0.0184882	-0.365902	0.00153635	0.763529	sp.Q8IXQ4.GPAM1_HUMAN	0.743417	0.12558	0.0647485	-0.409085	0.216198	0.534665	Scaling	Scaling	Buffering	Scaling
GPATCH1	0.0389721	0.478773	0.541253	-0.169331	0.0828449	0.648103	sp.Q9BRR8.GPTC1_HUMAN	0.769972	0.0764935	0.0775512	-0.42327	0.11832	0.499764	Scaling	Buffering	Buffering	Scaling
GPATCH11	0.862378	0.061117	0.28476	-0.392788	0.341022	0.453905	sp.Q8N954.GPT11_HUMAN	0.982032	-0.00587002	0.338543	-0.285543	0.435615	0.279673	Buffering	Scaling	Buffering	Scaling
GPATCH2L	0.0859146	0.579614	0.149276	-0.425574	0.0202723	1.00519	sp.Q9NWQ4.GPT2L_HUMAN	0.766463	-0.235749	0.105472	-0.563283	0.691319	0.327534	Scaling	Scaling	Anti-Scaling	Scaling
GPC6	0.369416	-0.483611	0.667048	-0.235131	0.722932	-0.248481	sp.Q9Y625.GPC6_HUMAN	0.29531	-0.659134	0.852617	-0.133039	0.545069	-0.526095	Anti-Scaling	Buffering	Anti-Scaling	Buffering
GPCPD1	0.418572	0.286504	0.0827881	-0.577961	0.0633929	0.864465	sp.Q9NPB8.GPCP1_HUMAN	0.685297	0.135616	0.253437	-0.380342	0.240707	0.515957	Scaling	Scaling	Buffering	Scaling
GPHN	0.645226	0.417748	0.123012	-0.583725	0.308786	1.00147	sp.Q9NQX3.2.GEPH_HUMAN	0.88458	-0.0794555	0.0475688	-0.829102	0.251798	0.749647	Scaling	Scaling	Buffering	Scaling
GPI	0.277462	0.436629	0.790108	0.0438971	0.337859	0.392732	sp.P06744.G6PI_HUMAN	0.128141	0.662922	0.0524976	0.66371	0.998515	-0.000787998	Scaling	Buffering	Scaling	Anti-Scaling
GPN3	0.0450354	0.798929	5.23941e-07	-0.290701	0.0212918	1.08963	sp.Q9UHW5.2.GPN3_HUMAN	0.186494	-0.800025	0.815643	0.125298	0.212854	-0.925323	Scaling	Scaling	Anti-Scaling	Anti-Scaling
GPNMB	0.179059	0.93723	1.60786e-07	-1.99813	9.24259e-05	2.93537	sp.Q14956.2.GPNMB_HUMAN	0.0331344	1.3786	0.425658	1.17865	0.89128	0.19995	Scaling	Scaling	Scaling	Anti-Scaling
GPR107	0.00817956	0.68616	0.448348	0.240093	0.218951	0.446067	sp.Q5VW38.2.GP107_HUMAN	0.220542	0.233721	0.612399	0.0919171	0.543644	0.141804	Scaling	Anti-Scaling	Buffering	Buffering
GPR108	0.174001	0.46859	0.713806	-0.158986	0.239818	0.627576	sp.Q9NPR9.GP108_HUMAN	0.690772	0.489504	0.281466	1.16957	0.638307	-0.680061	Scaling	Buffering	Scaling	Anti-Scaling
GPR180	0.77721	-0.0842782	0.011049	-0.579014	0.162398	0.494736	sp.Q86V85.GP180_HUMAN	0.421616	0.364851	0.0610186	-0.453338	0.110614	0.818189	Buffering	Scaling	Scaling	Scaling
GPRC5A	0.789142	-0.235282	2.42286e-15	-3.47056	0.00180267	3.23528	sp.Q8NFJ5.RAI3_HUMAN	0.90353	0.0619067	0.0674675	-2.02032	0.046524	2.08223	Anti-Scaling	Scaling	Buffering	Scaling
GPS2	0.283418	0.478879	0.0015159	-0.806321	0.0361406	1.2852	sp.Q13227.GPS2_HUMAN	0.111001	-0.322818	0.512145	-0.112865	0.326194	-0.209953	Scaling	Scaling	Anti-Scaling	Buffering
GPSM1	0.458113	-0.460569	0.800664	0.136089	0.435072	-0.596658	sp.Q86YR5.GPSM1_HUMAN	0.991997	-0.00407847	0.549034	-0.280687	0.633571	0.276608	Anti-Scaling	Anti-Scaling	Buffering	Scaling
GPT2	0.17927	0.983301	0.171895	-0.90791	0.0486441	1.89121	sp.Q8TD30.ALAT2_HUMAN	0.0665771	1.14247	0.0983263	-0.560762	0.0159511	1.70323	Scaling	Scaling	Scaling	Scaling
GPX2	0.865259	0.229812	4.96926e-06	-1.66328	0.200587	1.89309	sp.P18283.GPX2_HUMAN	0.0834357	-0.87216	0.0501739	-0.602775	0.541148	-0.269385	Buffering	Scaling	Anti-Scaling	Scaling
GPX4	0.633836	-0.125463	0.707095	-0.277534	0.839333	0.152072	sp.P36969.GPX4_HUMAN	0.0986356	0.650942	0.383372	-0.880179	0.186614	1.53112	Anti-Scaling	Scaling	Scaling	Scaling
GRAMD1A	0.120268	0.824227	0.0983091	0.250851	0.249728	0.573377	sp.Q96CP6.GRM1A_HUMAN	0.031969	0.98458	0.840785	-0.145522	0.208127	1.1301	Scaling	Anti-Scaling	Scaling	Buffering
GRAMD1B	0.742647	0.327683	0.801287	0.174364	0.894684	0.153319	sp.Q3KR37.GRM1B_HUMAN	0.709798	-0.154207	0.142885	-0.304243	0.697292	0.150036	Scaling	Anti-Scaling	Anti-Scaling	Scaling
GRB10	0.505934	-0.324887	0.791248	0.384473	0.637307	-0.70936	sp.Q13322.GRB10_HUMAN	0.666655	0.127097	0.771039	-0.245831	0.662876	0.372928	Anti-Scaling	Anti-Scaling	Buffering	Buffering
GRHPR	0.307182	0.142403	0.0236165	-0.411383	0.0110387	0.553786	sp.Q9UBQ7.GRHPR_HUMAN	0.905653	0.0250329	0.00239729	-0.579759	0.0345256	0.604792	Buffering	Scaling	Buffering	Scaling
GRTP1	0.218906	-1.01196	0.121306	-0.812202	0.819422	-0.199755	sp.Q5TC63.GRTP1_HUMAN	0.303805	0.982314	0.936077	0.0406622	0.337997	0.941652	Anti-Scaling	Scaling	Scaling	Buffering
GRWD1	0.00388054	0.76604	0.845702	0.0707322	0.142753	0.695308	sp.Q9BQ67.GRWD1_HUMAN	0.456261	0.0891128	0.591417	-0.174411	0.44204	0.263524	Scaling	Buffering	Buffering	Buffering
GSE1	0.599058	-0.132722	0.518887	-0.314829	0.725671	0.182107	sp.Q14687.GSE1_HUMAN	0.35334	0.211636	0.871754	0.0485393	0.639717	0.163097	Anti-Scaling	Scaling	Buffering	Buffering
GSK3A	0.197705	0.420266	0.620129	0.117654	0.409697	0.302612	sp.P49840.GSK3A_HUMAN	0.702428	-0.100961	0.184935	0.676957	0.137348	-0.777918	Scaling	Anti-Scaling	Anti-Scaling	Anti-Scaling
GSKIP	0.0887909	0.677662	0.267903	-0.287391	0.0341268	0.965053	sp.Q9P0R6.GSKIP_HUMAN	0.187707	1.22236	0.0241903	-0.656598	0.0880001	1.87896	Scaling	Scaling	Scaling	Scaling
GSN	0.0155608	0.716965	0.144991	1.21786	0.502	-0.500891	sp.P06396.GELS_HUMAN	0.569326	-0.103442	0.107476	0.553498	0.0633887	-0.656941	Scaling	Anti-Scaling	Anti-Scaling	Anti-Scaling
GSPT1	0.083471	0.456882	0.0290143	-0.529132	0.00434336	0.986014	sp.P15170.2.ERF3A_HUMAN	0.717525	0.154799	0.922029	0.0218027	0.771411	0.132996	Scaling	Scaling	Buffering	Buffering
GSR	0.135529	0.377957	0.0330013	-0.639621	0.00611514	1.01758	sp.P00390.GSHR_HUMAN	0.343572	0.214063	0.00455686	-0.803891	0.00256848	1.01795	Scaling	Scaling	Buffering	Scaling
GSTP1	0.956618	0.0609991	0.357	-1.25318	0.435993	1.31418	sp.P09211.GSTP1_HUMAN	0.718553	0.255473	0.489563	-0.498079	0.440566	0.753552	Buffering	Scaling	Scaling	Scaling
GSTZ1	0.119645	0.625227	0.0587495	-0.529857	0.0181384	1.15508	sp.O43708.MAAI_HUMAN	0.00786945	0.910039	0.631939	-0.116134	0.00668267	1.02617	Scaling	Scaling	Scaling	Buffering
GSTZ1	0.119645	0.625227	0.0587495	-0.529857	0.0181384	1.15508	tr.G3V4T6.G3V4T6_HUMAN	0.00316602	1.06143	0.631501	-0.67656	0.242765	1.73799	Scaling	Scaling	Scaling	Scaling
GTF2A1	0.265856	0.335198	0.00617265	-0.620591	0.0157185	0.95579	sp.P52655.TF2AA_HUMAN	0.358108	0.352835	0.0257091	-0.803447	0.0272187	1.15628	Scaling	Scaling	Scaling	Scaling
GTF2E2	0.0603874	0.385001	0.0800574	-0.369923	0.00755994	0.754924	sp.P29084.T2EB_HUMAN	0.258449	0.29135	0.221253	-0.226353	0.0823297	0.517703	Scaling	Scaling	Scaling	Buffering
GTF2F1	0.554742	0.202158	0.314338	-0.653005	0.223245	0.855162	sp.P35269.T2FA_HUMAN	0.0318362	0.552283	0.108489	-0.60908	0.0193108	1.16136	Buffering	Scaling	Scaling	Scaling
GTF2F2	0.221863	0.32259	0.262178	-0.251945	0.0846844	0.574535	sp.P13984.T2FB_HUMAN	0.518421	0.167534	0.0346748	-0.28417	0.117791	0.451704	Scaling	Scaling	Buffering	Scaling
GTF2H3	0.113863	0.49973	0.644683	0.130902	0.320144	0.368828	sp.Q13889.TF2H3_HUMAN	0.221853	-0.43493	0.283855	0.240205	0.0995253	-0.675135	Scaling	Anti-Scaling	Anti-Scaling	Anti-Scaling
GTF3A	0.00320164	1.20462	0.156916	-0.431495	0.000621691	1.63612	sp.Q92664.TF3A_HUMAN	0.606743	0.38636	0.797547	-0.141677	0.555624	0.528038	Scaling	Scaling	Scaling	Buffering
GTF3C1	0.708748	-0.0440016	0.017961	-0.699221	0.0261059	0.65522	sp.Q12789.TF3C1_HUMAN	0.252604	0.284002	0.169826	-0.190197	0.0956645	0.474199	Buffering	Scaling	Scaling	Buffering
GTF3C2	0.0588453	0.411934	0.0643034	-0.392327	0.00737988	0.804261	sp.Q8WUA4.TF3C2_HUMAN	0.016853	0.348778	0.047767	-0.503291	0.00690889	0.852069	Scaling	Scaling	Scaling	Scaling
GTF3C4	0.824001	0.0333696	0.150018	-0.241542	0.174114	0.274912	sp.Q9UKN8.TF3C4_HUMAN	0.319272	0.17442	0.904893	-0.0220808	0.408038	0.196501	Buffering	Buffering	Buffering	Buffering
GTF3C5	0.344085	0.108737	0.0089175	-0.390776	0.00451163	0.499513	sp.Q9Y5Q8.TF3C5_HUMAN	0.287837	0.135782	0.679033	0.0673201	0.716087	0.0684621	Buffering	Scaling	Buffering	Buffering
GTF3C6	0.146916	0.670947	0.0387601	-0.508918	0.0321291	1.17987	sp.Q969F1.TF3C6_HUMAN	0.544589	0.299831	0.0730786	-0.33407	0.257633	0.6339	Scaling	Scaling	Scaling	Scaling
GTPBP3	0.0433082	0.234913	0.621786	-0.258133	0.382958	0.493047	sp.Q969Y2.2.GTPB3_HUMAN	0.613374	0.320649	0.903486	-0.0171113	0.597638	0.33776	Buffering	Scaling	Scaling	Buffering
GTPBP4	0.0391701	0.530758	2.15086e-07	-0.98442	0.000128122	1.51518	sp.Q9BZE4.NOG1_HUMAN	0.0977812	0.505378	0.0391756	-0.328925	0.0184334	0.834302	Scaling	Scaling	Scaling	Scaling
GXYLT1	0.351653	0.443401	0.888181	-0.0868161	0.474916	0.530217	sp.Q4G148.GXLT1_HUMAN	0.996116	0.00122581	0.844223	-0.0635732	0.861651	0.064799	Scaling	Buffering	Buffering	Buffering
GYS1	0.0697543	0.72082	0.494551	-0.359287	0.109764	1.08011	sp.P13807.GYS1_HUMAN	0.0321106	0.550732	0.917355	0.0400975	0.269341	0.510634	Scaling	Scaling	Scaling	Buffering
GZF1	0.512236	0.182973	0.0830107	-0.414621	0.094625	0.597594	sp.Q9H116.GZF1_HUMAN	0.028063	0.428318	0.543488	-0.0979481	0.0274399	0.526266	Buffering	Scaling	Scaling	Buffering
H2AFV	0.00554294	0.310736	0.00680862	-0.53086	0.000320907	0.841596	sp.Q71UI9.H2AV_HUMAN	0.873036	0.0195117	0.768362	-0.035651	0.681427	0.0551628	Scaling	Scaling	Buffering	Buffering
H2AFX	0.586575	0.153062	0.0625615	-0.686118	0.0558145	0.83918	sp.P16104.H2AX_HUMAN	0.63865	-0.0599519	1.13408e-05	-0.524659	0.00445812	0.464707	Buffering	Scaling	Buffering	Scaling
HABP4	0.973507	-0.0216699	0.95235	-0.0572512	0.974565	0.0355813	sp.Q5JVS0.HABP4_HUMAN	0.846617	0.0648852	0.314896	-0.831496	0.298859	0.896381	Buffering	Buffering	Buffering	Scaling
HADHA	0.0137417	0.579782	0.43605	-0.358767	0.0954168	0.938548	sp.P40939.ECHA_HUMAN	0.00157219	0.889168	0.332239	-0.190785	0.00213555	1.07995	Scaling	Scaling	Scaling	Buffering
HADHB	0.0246255	0.730976	0.341566	-0.359028	0.0324765	1.09	sp.P55084.ECHB_HUMAN	0.000666068	0.929959	0.652068	-0.128984	0.017496	1.05894	Scaling	Scaling	Scaling	Buffering
HAGH	0.412079	0.542883	0.201548	-0.525317	0.169787	1.0682	sp.Q16775.GLO2_HUMAN	0.561689	0.308024	0.235292	-0.271392	0.324014	0.579416	Scaling	Scaling	Scaling	Scaling
HAUS4	0.922977	0.0244545	0.000511708	-1.08958	0.00466551	1.11404	sp.Q9H6D7.HAUS4_HUMAN	0.0428337	-0.139695	0.597776	-0.10686	0.865316	-0.0328348	Buffering	Scaling	Anti-Scaling	Buffering
HAUS5	0.0838236	0.534585	0.690265	-0.0604867	0.0693225	0.595072	sp.O94927.HAUS5_HUMAN	0.805155	-0.0761935	0.227456	0.255755	0.341967	-0.331949	Scaling	Buffering	Buffering	Anti-Scaling
HAUS6	0.833624	-0.0930219	5.80679e-05	-0.726625	0.215725	0.633603	sp.Q7Z4H7.HAUS6_HUMAN	0.335836	0.640319	0.0119984	-0.341998	0.17614	0.982317	Buffering	Scaling	Scaling	Scaling
HBA1	0.793461	0.129233	0.285147	1.68413	0.331533	-1.55489	sp.P69905.HBA_HUMAN	0.120806	-0.786228	0.267278	0.965389	0.0711717	-1.75162	Buffering	Anti-Scaling	Anti-Scaling	Anti-Scaling
HBS1L	0.853308	0.0337541	0.319586	-0.331198	0.312181	0.364952	sp.Q9Y450.HBS1L_HUMAN	0.535089	0.267719	0.779438	0.0512691	0.622972	0.21645	Buffering	Scaling	Scaling	Buffering
HCFC2	0.386438	0.479276	0.896003	0.0254481	0.41923	0.453828	sp.Q9Y5Z7.HCFC2_HUMAN	0.232049	0.262769	0.342379	0.321505	0.861247	-0.0587359	Scaling	Buffering	Scaling	Anti-Scaling
HDAC2	0.954474	0.0302144	0.190511	-0.485067	0.41618	0.515281	tr.J3KPW7.J3KPW7_HUMAN	0.369501	-0.27947	0.713727	-0.0735797	0.530817	-0.20589	Buffering	Scaling	Anti-Scaling	Buffering
HDAC7	0.335182	-0.520233	0.943291	0.0414394	0.449408	-0.561673	sp.Q8WUI4.5.HDAC7_HUMAN	0.00022691	-0.548716	0.991731	0.00293341	0.141037	-0.55165	Anti-Scaling	Buffering	Anti-Scaling	Buffering
HDDC2	0.840036	-0.121141	0.00288615	-0.813014	0.318129	0.691873	sp.Q7Z4H3.HDDC2_HUMAN	0.71007	-0.382812	0.171984	-0.462338	0.93885	0.0795256	Anti-Scaling	Scaling	Anti-Scaling	Scaling
HDHD3	0.0163008	0.936189	0.557695	0.269124	0.217847	0.667065	sp.Q9BSH5.HDHD3_HUMAN	0.0535562	0.824805	0.0762077	0.484304	0.404145	0.340501	Scaling	Anti-Scaling	Scaling	Anti-Scaling
HEATR3	0.673906	0.0815072	0.00715505	-0.695554	0.0110532	0.777061	sp.Q7Z4Q2.HEAT3_HUMAN	0.485533	0.133205	0.74703	0.0797384	0.855807	0.0534663	Buffering	Scaling	Buffering	Buffering
HEATR5A	0.241458	0.553135	0.432715	-0.266094	0.140403	0.819229	sp.Q86XA9.HTR5A_HUMAN	0.416582	0.281448	0.297647	-0.236167	0.194522	0.517615	Scaling	Scaling	Scaling	Buffering
HEATR5B	0.774405	0.111223	0.120389	-0.346451	0.300147	0.457674	sp.Q9P2D3.HTR5B_HUMAN	0.494857	-0.058697	0.437036	-0.121623	0.665401	0.0629261	Buffering	Scaling	Buffering	Buffering
HEBP1	0.468792	-0.455578	0.22239	-1.75347	0.336593	1.29789	sp.Q9NRV9.HEBP1_HUMAN	0.926043	0.0431653	0.474232	-0.830539	0.466622	0.873704	Anti-Scaling	Scaling	Buffering	Scaling
HEBP2	0.129031	1.36042	0.219834	-0.51496	0.0496472	1.87538	sp.Q9Y5Z4.HEBP2_HUMAN	0.686474	0.424385	0.36577	-0.387443	0.475271	0.811828	Scaling	Scaling	Scaling	Scaling
HECTD1	0.0390509	0.765082	0.00013146	-0.693801	0.00277463	1.45888	sp.Q9ULT8.HECD1_HUMAN	0.721096	-0.13321	0.209336	0.226699	0.376571	-0.359909	Scaling	Scaling	Anti-Scaling	Anti-Scaling
HECTD4	0.941633	-0.021684	0.93236	0.0458551	0.908599	-0.067539	tr.F8VWT9.F8VWT9_HUMAN	0.818079	-0.0561687	0.457488	-0.129173	0.78708	0.0730044	Buffering	Buffering	Buffering	Buffering
HEMGN	0.129133	-0.0829583	0.495271	0.300934	0.39085	-0.383893	sp.Q9BXL5.HEMGN_HUMAN	0.711992	0.309059	0.391675	0.880208	0.635312	-0.571149	Buffering	Anti-Scaling	Scaling	Anti-Scaling
HERPUD1	0.567182	-0.17111	0.0427238	-1.13063	0.0957058	0.959523	sp.Q15011.HERP1_HUMAN	0.163274	0.643686	0.446831	-0.243629	0.0952989	0.887315	Anti-Scaling	Scaling	Scaling	Buffering
HGSNAT	0.140488	0.446569	0.526362	0.193101	0.510896	0.253468	sp.Q68CP4.HGNAT_HUMAN	0.747214	-0.117344	0.614847	-0.158773	0.919366	0.0414289	Scaling	Anti-Scaling	Anti-Scaling	Buffering
HIBADH	1.163e-05	0.841833	0.615216	-0.478651	0.219946	1.32048	sp.P31937.3HIDH_HUMAN	0.00019438	0.662589	0.220857	-0.673668	0.0488864	1.33626	Scaling	Scaling	Scaling	Scaling
HINT2	0.932156	-0.029024	0.0961552	-0.316376	0.443903	0.287352	sp.Q9BX68.HINT2_HUMAN	0.330136	0.216264	0.0280264	-0.477215	0.0192641	0.69348	Buffering	Scaling	Buffering	Scaling
HINT3	0.464181	0.671946	0.0662554	-0.717057	0.193658	1.389	sp.Q9NQE9.HINT3_HUMAN	0.172387	0.879809	0.0762122	-0.644381	0.0414138	1.52419	Scaling	Scaling	Scaling	Scaling
HIP1R	0.219687	0.322353	0.204622	-1.07708	0.129104	1.39943	sp.O75146.HIP1R_HUMAN	0.655276	-0.107457	0.150754	-0.303803	0.475798	0.196346	Scaling	Scaling	Anti-Scaling	Scaling
HIRIP3	0.12657	-0.479288	0.21513	-0.293737	0.543335	-0.18555	sp.Q9BW71.HIRP3_HUMAN	0.910977	0.0569374	0.243591	0.322574	0.633869	-0.265637	Anti-Scaling	Scaling	Buffering	Anti-Scaling
HK2	0.657957	-0.251314	0.300174	0.300168	0.374742	-0.551482	sp.P52789.HXK2_HUMAN	0.397951	-0.175983	0.580576	0.260751	0.386514	-0.436734	Anti-Scaling	Anti-Scaling	Anti-Scaling	Anti-Scaling
HMBOX1	0.000292722	0.74276	0.0946577	-0.478852	0.000612753	1.22161	sp.Q6NT76.5.HMBX1_HUMAN	0.0682998	0.674172	0.0109011	-0.932477	0.00141348	1.60665	Scaling	Scaling	Scaling	Scaling
HMBS	0.0465964	0.426392	0.00771593	-0.881892	0.000819686	1.30828	sp.P08397.HEM3_HUMAN	0.175622	0.677008	0.164512	-0.478786	0.0529604	1.15579	Scaling	Scaling	Scaling	Scaling
HMG20B	0.605593	0.0839367	8.25035e-08	-0.718894	0.012201	0.80283	sp.Q9P0W2.HM20B_HUMAN	0.935648	0.0331236	0.987242	0.00935521	0.971913	0.0237684	Buffering	Scaling	Buffering	Buffering
HMGA2	0.495638	-0.932403	0.465208	-1.31289	0.849089	0.380484	sp.P52926.HMGA2_HUMAN	0.00429744	-1.18011	0.890315	-0.132612	0.332666	-1.0475	Anti-Scaling	Scaling	Anti-Scaling	Buffering
HMGB1	0.00105988	0.682095	0.0259521	-0.644984	0.000237292	1.32708	sp.P09429.HMGB1_HUMAN	0.0107986	0.983747	0.460609	-0.231204	0.0073622	1.21495	Scaling	Scaling	Scaling	Buffering
HMGN3	0.776232	0.0802248	0.313471	-0.420663	0.288859	0.500888	sp.Q15651.HMGN3_HUMAN	0.492288	0.233939	0.959775	0.0181823	0.632273	0.215757	Buffering	Scaling	Buffering	Buffering
HMOX2	0.424404	0.35412	0.0462343	-0.817818	0.0546726	1.17194	sp.P30519.HMOX2_HUMAN	0.262629	0.804167	0.0172282	-0.758178	0.0752599	1.56235	Scaling	Scaling	Scaling	Scaling
HNRNPA1	0.313939	-0.328092	0.715932	-0.14411	0.693015	-0.183982	sp.P09651.ROA1_HUMAN	0.590257	0.245621	0.943436	-0.0241541	0.614342	0.269775	Anti-Scaling	Buffering	Buffering	Buffering
HNRNPA1	0.313939	-0.328092	0.715932	-0.14411	0.693015	-0.183982	tr.H0YH80.H0YH80_HUMAN	0.806703	0.114353	0.428045	-0.495427	0.401313	0.60978	Anti-Scaling	Buffering	Buffering	Scaling
HNRNPA2B1	0.852646	0.0221911	0.242889	-0.570491	0.229685	0.592682	sp.P22626.ROA2_HUMAN	0.979941	-0.00327919	0.545995	-0.101017	0.595932	0.0977373	Buffering	Scaling	Buffering	Buffering
HNRNPC	0.0689069	0.185255	0.0657681	-0.410289	0.0163707	0.595544	tr.B4DY08.B4DY08_HUMAN	0.952452	-0.0135364	0.00939714	-0.616117	0.0493669	0.60258	Buffering	Scaling	Buffering	Scaling
HNRNPC	0.0689069	0.185255	0.0657681	-0.410289	0.0163707	0.595544	sp.P07910.HNRPC_HUMAN	0.520645	0.157911	0.00181005	-0.70281	0.0127554	0.860722	Buffering	Scaling	Buffering	Scaling
HNRNPK	0.163125	-0.170974	0.00318909	-0.602285	0.0186637	0.431311	sp.P61978.3.HNRPK_HUMAN	0.954023	0.010782	0.274017	-0.13608	0.483108	0.146862	Anti-Scaling	Scaling	Buffering	Buffering
HNRNPL	0.698584	0.118992	0.708058	0.105935	0.973312	0.0130571	sp.P14866.HNRPL_HUMAN	0.888561	0.0245859	0.622472	-0.189208	0.596379	0.213794	Buffering	Anti-Scaling	Buffering	Buffering
HNRNPLL	0.00785825	0.637264	0.539493	-0.186003	0.0381089	0.823268	sp.Q8WVV9.HNRLL_HUMAN	1.70502e-05	0.727112	0.776503	-0.0416394	0.00162907	0.768752	Scaling	Buffering	Scaling	Buffering
HNRNPM	0.343186	-0.429332	0.600342	-0.428258	0.998985	-0.00107316	sp.P52272.HNRPM_HUMAN	0.370353	0.266337	0.536954	-0.228323	0.274167	0.49466	Anti-Scaling	Scaling	Scaling	Buffering
HNRNPUL1	0.420591	0.273456	0.9331	-0.0258617	0.49033	0.299318	sp.Q9BUJ2.HNRL1_HUMAN	0.030426	0.328416	0.0641373	-0.315848	0.00455276	0.644264	Scaling	Buffering	Scaling	Scaling
HNRNPUL2	0.998834	-0.000353185	0.163143	0.275899	0.344766	-0.276252	sp.Q1KMD3.HNRL2_HUMAN	0.0744024	0.316334	0.217445	0.203644	0.577502	0.11269	Buffering	Anti-Scaling	Scaling	Anti-Scaling
HOMER3	0.431608	1.11324	0.593254	-0.537178	0.314464	1.65042	sp.Q9NSC5.HOME3_HUMAN	0.623795	0.265342	0.965122	0.0174549	0.689882	0.247887	Scaling	Scaling	Scaling	Buffering
HOMEZ	0.0935937	0.535019	0.00638606	-0.920043	0.0017537	1.45506	sp.Q8IX15.HOMEZ_HUMAN	0.539226	0.262718	0.0104908	-0.504876	0.131013	0.767594	Scaling	Scaling	Scaling	Scaling
HOOK2	0.302988	-0.327334	0.782219	0.216241	0.515745	-0.543575	sp.Q96ED9.2.HOOK2_HUMAN	0.379282	-0.496335	0.857872	-0.0370423	0.415532	-0.459293	Anti-Scaling	Anti-Scaling	Anti-Scaling	Buffering
HOOK3	0.00101438	0.525915	0.942368	-0.0230506	0.111299	0.548966	sp.Q86VS8.HOOK3_HUMAN	0.800624	0.059735	0.668749	0.0992587	0.897016	-0.0395237	Scaling	Buffering	Buffering	Buffering
HPCAL1	0.881253	0.110525	0.906907	0.129148	0.988318	-0.0186226	sp.P37235.HPCL1_HUMAN	0.665786	0.331654	0.92477	0.0972131	0.848153	0.234441	Buffering	Anti-Scaling	Scaling	Buffering
HS1BP3	0.424082	0.346238	0.806126	0.0801489	0.594546	0.266089	sp.Q53T59.H1BP3_HUMAN	0.695902	0.208182	0.23922	0.409404	0.732245	-0.201222	Scaling	Buffering	Buffering	Anti-Scaling
HSBP1	0.837355	0.0381299	0.263456	-0.480376	0.248909	0.518506	sp.O75506.HSBP1_HUMAN	0.166385	0.584828	0.628538	-0.169243	0.146184	0.754071	Buffering	Scaling	Scaling	Buffering
HSD11B2	0.256947	1.17337	0.548063	-0.281631	0.187555	1.455	sp.P80365.DHI2_HUMAN	0.756757	0.234134	0.77638	-0.103465	0.673616	0.337599	Scaling	Scaling	Buffering	Buffering
HSD17B2	0.424935	0.805653	0.581755	0.356872	0.692883	0.44878	sp.P37059.DHB2_HUMAN	0.572836	0.571993	0.720043	-0.181644	0.491687	0.753637	Scaling	Anti-Scaling	Scaling	Buffering
HSD3B7	1.22115e-05	2.11356	0.608397	0.365237	0.0343983	1.74833	sp.Q9H2F3.3BHS7_HUMAN	0.0205642	1.01705	0.990667	-0.00660171	0.12011	1.02365	Scaling	Anti-Scaling	Scaling	Buffering
HSDL1	0.36859	-0.215267	0.2727	-0.278882	0.839796	0.0636149	sp.Q3SXM5.HSDL1_HUMAN	0.36558	0.244953	0.0568812	-0.445549	0.0455986	0.690502	Anti-Scaling	Scaling	Buffering	Scaling
HSDL2	0.0756001	0.430753	0.760261	-0.0605206	0.0884052	0.491273	sp.Q6YN16.HSDL2_HUMAN	0.127237	0.537686	0.571309	-0.130746	0.0921964	0.668432	Scaling	Buffering	Scaling	Buffering
HSP90AA1	0.216173	0.371789	0.376145	-0.256263	0.1098	0.628052	sp.P07900.2.HS90A_HUMAN	0.870467	0.0360744	0.0127189	-0.432456	0.0887083	0.468531	Scaling	Scaling	Buffering	Scaling
HSP90B1	0.258313	0.594289	0.705954	-0.191589	0.255344	0.785878	sp.P14625.ENPL_HUMAN	0.176569	0.745092	0.902114	-0.0550508	0.225108	0.800143	Scaling	Buffering	Scaling	Buffering
HSPA14	0.0846881	0.639375	2.42513e-07	-0.996667	0.00223053	1.63604	sp.Q0VDF9.HSP7E_HUMAN	0.0846232	0.395798	0.0128073	-0.373193	0.00633935	0.768991	Scaling	Scaling	Scaling	Scaling
HSPA2	0.161513	-0.790854	0.944467	0.0295072	0.198697	-0.820362	sp.P54652.HSP72_HUMAN	0.0470054	-1.05678	0.856357	-0.0818017	0.113644	-0.974978	Anti-Scaling	Buffering	Anti-Scaling	Buffering
HSPA5	0.162944	0.378739	0.0349046	0.642946	0.411142	-0.264207	sp.P11021.GRP78_HUMAN	0.565834	0.0961869	0.166512	0.162377	0.710406	-0.0661906	Scaling	Anti-Scaling	Buffering	Anti-Scaling
HSPA8	0.555172	-0.253565	0.947003	0.024768	0.609928	-0.278333	tr.E9PN89.E9PN89_HUMAN	0.686434	0.295127	0.295029	-0.787214	0.262609	1.08234	Anti-Scaling	Buffering	Scaling	Scaling
HSPA8	0.555172	-0.253565	0.947003	0.024768	0.609928	-0.278333	sp.P11142.HSP7C_HUMAN	0.972606	0.00527834	0.929685	0.0127755	0.970073	-0.00749713	Anti-Scaling	Buffering	Buffering	Buffering
HSPB8	0.822761	0.188931	0.709089	-0.422468	0.644726	0.611399	sp.Q9UJY1.HSPB8_HUMAN	0.376868	0.496996	0.00633993	-0.897551	0.0504371	1.39455	Buffering	Scaling	Scaling	Scaling
HSPBP1	3.01604e-08	0.683396	0.659987	0.0906499	0.0634707	0.592746	sp.Q9NZL4.HPBP1_HUMAN	0.0013253	0.437845	0.369902	0.0685337	0.00586662	0.369311	Scaling	Buffering	Scaling	Buffering
HSPH1	0.187432	0.485839	0.0906778	-0.593189	0.0285464	1.07903	sp.Q92598.HS105_HUMAN	0.0373443	0.589531	0.726821	-0.104861	0.0685881	0.694392	Scaling	Scaling	Scaling	Buffering
HTRA2	0.701965	0.113242	0.725661	-0.0902836	0.582243	0.203525	sp.O43464.HTRA2_HUMAN	0.158103	0.32448	0.439678	-0.161669	0.0978494	0.486149	Buffering	Buffering	Scaling	Buffering
HUS1	0.000504779	0.54242	0.0027805	-1.36283	9.85367e-05	1.90525	sp.O60921.HUS1_HUMAN	0.0550112	0.252315	0.635343	-0.114951	0.184878	0.367266	Scaling	Scaling	Scaling	Buffering
HYLS1	0.699052	0.148333	0.411277	-0.240618	0.38749	0.38895	sp.Q96M11.HYLS1_HUMAN	0.917759	-0.0663546	0.0902339	-0.6409	0.414575	0.574546	Buffering	Buffering	Buffering	Scaling
HYOU1	0.672545	0.151933	0.0689017	-0.696247	0.0906523	0.848179	sp.Q9Y4L1.HYOU1_HUMAN	0.42007	0.250189	0.0145389	-0.586239	0.0334824	0.836427	Buffering	Scaling	Scaling	Scaling
IAH1	0.141161	1.10089	0.775611	0.199985	0.32461	0.900907	sp.Q2TAA2.IAH1_HUMAN	0.113149	1.23499	0.355873	0.221896	0.170113	1.01309	Scaling	Anti-Scaling	Scaling	Anti-Scaling
IARS	0.751312	0.082465	0.0500771	-0.388814	0.132456	0.471279	sp.P41252.SYIC_HUMAN	0.405566	-0.268175	0.537646	-0.172233	0.808524	-0.0959416	Buffering	Scaling	Anti-Scaling	Buffering
IBTK	0.579546	0.275935	0.0408461	-0.736321	0.116651	1.01226	sp.Q9P2D0.IBTK_HUMAN	0.935978	-0.0255806	0.159579	-0.332113	0.42004	0.306532	Scaling	Scaling	Buffering	Scaling
ICA1	0.133891	0.772189	0.799104	-0.221072	0.307136	0.99326	sp.Q05084.ICA69_HUMAN	0.138873	0.612505	0.852472	0.0880339	0.341634	0.524471	Scaling	Buffering	Scaling	Buffering
ICAM1	0.873498	-0.147215	0.358429	2.20721	0.33819	-2.35443	sp.P05362.ICAM1_HUMAN	0.918024	0.0828698	0.27379	1.88603	0.298207	-1.80316	Anti-Scaling	Anti-Scaling	Buffering	Anti-Scaling
ICAM5	0.493392	0.373723	0.67779	-0.681106	0.538949	1.05483	sp.Q9UMF0.ICAM5_HUMAN	0.0205123	-0.346152	0.315137	-0.564063	0.661779	0.217911	Scaling	Scaling	Anti-Scaling	Scaling
IDH3B	0.0246188	0.307787	0.00107509	-0.76259	6.1375e-05	1.07038	sp.O43837.IDH3B_HUMAN	0.232144	0.258589	0.522483	-0.128552	0.163302	0.38714	Scaling	Scaling	Scaling	Buffering
IDI1	0.442253	0.308333	0.00215769	-0.849584	0.0260726	1.15792	sp.Q13907.2.IDI1_HUMAN	0.383276	0.215129	0.144931	-0.245565	0.103929	0.460694	Scaling	Scaling	Buffering	Buffering
IFI30	0.855187	-0.496983	0.217746	0.427581	0.736993	-0.924564	sp.P13284.GILT_HUMAN	0.633817	0.562515	0.142444	0.884163	0.788303	-0.321648	Anti-Scaling	Anti-Scaling	Scaling	Anti-Scaling
IFNGR1	0.148317	1.02036	0.077946	-1.02356	0.0193698	2.04392	sp.P15260.INGR1_HUMAN	0.784319	-0.230473	0.168894	-0.527213	0.738131	0.29674	Scaling	Scaling	Anti-Scaling	Scaling
IFT172	0.602485	-0.144679	0.521469	0.228695	0.36853	-0.373374	sp.Q9UG01.IF172_HUMAN	0.503617	0.250992	0.53089	0.226704	0.958481	0.024288	Anti-Scaling	Anti-Scaling	Scaling	Anti-Scaling
IFT46	0.000158237	0.564156	0.14429	-0.404099	0.00424709	0.968255	sp.Q9NQC8.2.IFT46_HUMAN	0.874904	-0.056551	0.248742	-0.52925	0.373161	0.472699	Scaling	Scaling	Buffering	Scaling
IFT74	0.175471	0.842171	0.585291	-0.10378	0.13981	0.945951	sp.Q96LB3.IFT74_HUMAN	0.0720908	0.370378	0.0993846	0.271793	0.625556	0.0985846	Scaling	Buffering	Scaling	Anti-Scaling
IFT88	0.795359	0.0961723	0.203657	-0.386093	0.295628	0.482265	sp.Q13099.IFT88_HUMAN	0.372354	-0.311194	0.366094	-0.211438	0.79129	-0.0997554	Buffering	Scaling	Anti-Scaling	Buffering
IGF2BP3	0.129345	0.561959	0.415723	-1.0631	0.243837	1.62506	sp.O00425.IF2B3_HUMAN	0.726383	0.100846	0.380273	-0.608025	0.323531	0.708871	Scaling	Scaling	Buffering	Scaling
IGF2R	0.1207	0.527028	0.351471	-0.387904	0.0659831	0.914932	sp.P11717.MPRI_HUMAN	0.922939	0.0612107	0.0158401	-0.602588	0.354101	0.663798	Scaling	Scaling	Buffering	Scaling
IGFBP3	0.0231732	2.06129	0.497863	-1.3904	0.146487	3.4517	sp.P17936.2.IBP3_HUMAN	0.0131133	1.33612	0.0832485	-0.992106	0.00229458	2.32823	Scaling	Scaling	Scaling	Scaling
IGFBP6	0.711386	-0.657883	0.805268	-0.569948	0.974374	-0.087935	sp.P24592.IBP6_HUMAN	0.452123	-0.95139	0.944418	0.170018	0.673656	-1.12141	Anti-Scaling	Scaling	Anti-Scaling	Anti-Scaling
IGHMBP2	0.423656	0.130707	0.361447	0.211407	0.758478	-0.0807001	sp.P38935.SMBP2_HUMAN	0.146162	0.148057	0.287832	0.206454	0.764675	-0.0583968	Buffering	Anti-Scaling	Buffering	Anti-Scaling
IKBIP	0.469507	-0.735915	0.43992	-0.410826	0.756856	-0.325089	sp.Q70UQ0.4.IKIP_HUMAN	0.740033	-0.308316	0.626248	-0.458013	0.902454	0.149697	Anti-Scaling	Scaling	Anti-Scaling	Scaling
IKBIP	0.469507	-0.735915	0.43992	-0.410826	0.756856	-0.325089	sp.Q70UQ0.IKIP_HUMAN	0.674593	-0.243665	0.943856	0.0299023	0.684133	-0.273567	Anti-Scaling	Scaling	Anti-Scaling	Buffering
IKBKB	0.000644791	0.830149	0.268377	0.302974	0.105307	0.527175	sp.O14920.IKKB_HUMAN	0.0804815	0.630915	0.665862	0.112059	0.215424	0.518857	Scaling	Anti-Scaling	Scaling	Anti-Scaling
IKZF1	0.631699	-0.255215	0.141414	2.40477	0.112642	-2.65999	sp.Q13422.IKZF1_HUMAN	0.614742	-0.385724	0.286849	1.89845	0.222133	-2.28418	Anti-Scaling	Anti-Scaling	Anti-Scaling	Anti-Scaling
IL18	0.736144	0.495525	0.171877	-1.08181	0.33245	1.57734	sp.Q14116.IL18_HUMAN	0.931615	-0.0795435	0.163404	-0.702736	0.536056	0.623193	Scaling	Scaling	Buffering	Scaling
ILF3	0.605947	0.086473	0.701363	-0.286774	0.624884	0.373247	sp.Q12906.7.ILF3_HUMAN	0.914271	-0.0130521	0.607464	-0.163793	0.643227	0.150741	Buffering	Scaling	Buffering	Buffering
ILVBL	0.466927	-0.158422	0.324888	-0.472207	0.497734	0.313786	sp.A1L0T0.ILVBL_HUMAN	0.249605	-0.604457	0.278392	-0.296906	0.52478	-0.307551	Anti-Scaling	Scaling	Anti-Scaling	Scaling
IMMT	0.141474	0.335578	0.161651	-0.217579	0.0415591	0.553156	sp.Q16891.4.IMMT_HUMAN	0.445972	0.251254	0.16501	-0.281714	0.166126	0.532968	Scaling	Buffering	Scaling	Scaling
IMMT	0.141474	0.335578	0.161651	-0.217579	0.0415591	0.553156	sp.Q16891.2.IMMT_HUMAN	0.874672	-0.108093	0.27983	-0.354113	0.735975	0.24602	Scaling	Buffering	Anti-Scaling	Scaling
IMPA2	0.118067	0.676872	0.082697	-1.67195	0.0279136	2.34882	sp.O14732.IMPA2_HUMAN	0.569232	0.601442	0.525694	-0.356017	0.412297	0.957458	Scaling	Scaling	Scaling	Scaling
INCENP	0.707863	-0.0683867	0.910252	0.0392227	0.773884	-0.107609	sp.Q9NQS7.INCE_HUMAN	0.512429	0.156276	0.614019	-0.182826	0.408006	0.339102	Buffering	Buffering	Buffering	Buffering
INF2	0.992481	-0.0107521	0.808982	-0.0867399	0.94861	0.0759878	sp.Q27J81.INF2_HUMAN	0.57556	0.435589	0.006529	0.607786	0.823855	-0.172197	Buffering	Buffering	Scaling	Anti-Scaling
ING1	0.0669453	0.455472	0.000982352	-0.734637	0.000476822	1.19011	sp.Q9UK53.ING1_HUMAN	0.223053	0.29661	0.0194529	-0.527024	0.0109863	0.823634	Scaling	Scaling	Scaling	Scaling
ING4	0.18175	0.301783	0.558868	-0.501507	0.381404	0.80329	sp.Q9UNL4.8.ING4_HUMAN	0.89977	0.0306247	0.975794	-0.0152612	0.931641	0.0458858	Scaling	Scaling	Buffering	Buffering
INIP	0.297018	0.1714	0.535855	-0.17619	0.27919	0.34759	sp.Q9NRY2.SOSSC_HUMAN	0.271813	0.133085	0.0564788	-0.608984	0.0303697	0.742069	Buffering	Buffering	Buffering	Scaling
INO80E	0.274106	-0.262638	0.0880628	-0.459465	0.517625	0.196827	sp.Q8NBZ0.IN80E_HUMAN	0.549807	0.287813	0.155271	0.338391	0.917303	-0.050577	Anti-Scaling	Scaling	Scaling	Anti-Scaling
INPP5K	0.00847254	0.774775	0.00166478	-0.72423	3.88482e-05	1.499	sp.Q9BT40.INP5K_HUMAN	0.0627866	0.459646	0.0194803	-0.394493	0.00495133	0.854139	Scaling	Scaling	Scaling	Scaling
INPPL1	0.536088	-0.165117	0.423201	-0.269363	0.792461	0.104246	sp.O15357.SHIP2_HUMAN	0.818265	-0.0548029	0.424761	-0.240983	0.600992	0.18618	Anti-Scaling	Scaling	Buffering	Buffering
INSR	0.313948	0.767238	0.492177	0.899448	0.920559	-0.13221	sp.P06213.INSR_HUMAN	0.410982	0.693525	0.611571	0.219764	0.57796	0.473761	Scaling	Anti-Scaling	Scaling	Anti-Scaling
INTS1	0.000528454	0.414987	0.0362392	-0.895838	0.0101803	1.31083	sp.Q8N201.INT1_HUMAN	0.917944	-0.00846752	8.14718e-08	-0.562329	3.97498e-07	0.553862	Scaling	Scaling	Buffering	Scaling
INTS10	6.59715e-05	0.615672	0.00428396	-0.583871	5.57791e-06	1.19954	sp.Q9NVR2.INT10_HUMAN	0.282486	0.206479	0.595995	-0.0603466	0.211725	0.266826	Scaling	Scaling	Buffering	Buffering
INTS4	0.099236	0.455932	0.79681	0.0674081	0.269406	0.388524	sp.Q96HW7.INT4_HUMAN	0.91682	0.0222649	0.0690538	-0.211544	0.323546	0.233809	Scaling	Buffering	Buffering	Buffering
INTS5	0.11899	0.257955	0.435627	0.0851141	0.309207	0.172841	sp.Q6P9B9.INT5_HUMAN	0.362502	0.160055	0.0598137	-0.164729	0.097878	0.324783	Scaling	Buffering	Buffering	Buffering
INTS6	0.0717855	0.283041	0.00111149	-0.61671	0.000215157	0.899751	sp.Q9UL03.INT6_HUMAN	0.122144	0.320788	0.0307054	-0.28838	0.0143426	0.609168	Scaling	Scaling	Scaling	Scaling
INTS9	9.12666e-05	0.742094	0.148999	-0.358357	0.000462619	1.10045	sp.Q9NV88.INT9_HUMAN	0.747796	-0.0493665	0.852049	-0.0282093	0.917642	-0.0211572	Scaling	Scaling	Buffering	Buffering
IPO4	0.0324998	0.784706	0.128469	-0.630307	0.00883916	1.41501	sp.Q8TEX9.2.IPO4_HUMAN	0.128128	0.512739	0.0973296	-0.442217	0.0233171	0.954957	Scaling	Scaling	Scaling	Scaling
IPO5	0.270932	0.502134	0.00575253	-0.548042	0.0445677	1.05018	sp.O00410.3.IPO5_HUMAN	0.0412965	0.607666	0.281945	-0.288818	0.018379	0.896485	Scaling	Scaling	Scaling	Scaling
IPO8	0.000639818	0.512218	0.161538	-0.551643	0.0379295	1.06386	sp.O15397.IPO8_HUMAN	0.455748	0.155588	0.291525	-0.248125	0.159017	0.403713	Scaling	Scaling	Buffering	Buffering
IRAK4	0.216301	0.4529	0.532788	-0.921578	0.381209	1.37448	sp.Q9NWZ3.IRAK4_HUMAN	0.0300662	0.447625	0.823285	-0.174193	0.460016	0.621818	Scaling	Scaling	Scaling	Buffering
IRF2BP1	0.113107	0.355907	0.658417	-0.149969	0.217538	0.505877	sp.Q8IU81.I2BP1_HUMAN	0.519086	-0.163777	0.729228	-0.125916	0.926355	-0.0378606	Scaling	Buffering	Anti-Scaling	Buffering
IRF2BPL	0.3688	0.71864	0.843885	-0.0831581	0.35513	0.801798	sp.Q9H1B7.I2BPL_HUMAN	0.47797	0.328945	0.483587	-0.198958	0.315594	0.527902	Scaling	Buffering	Scaling	Buffering
IRF3	4.83784e-05	0.645304	0.757833	-0.195883	0.266525	0.841187	sp.Q14653.IRF3_HUMAN	0.35759	0.128169	0.522201	0.427249	0.646025	-0.299079	Scaling	Buffering	Buffering	Anti-Scaling
IRF9	0.508495	0.79208	0.514572	0.247597	0.653863	0.544483	sp.Q00978.IRF9_HUMAN	0.223511	0.799723	0.866446	0.0456679	0.261895	0.754055	Scaling	Anti-Scaling	Scaling	Buffering
IRGQ	0.322762	0.356012	0.251098	-0.288082	0.125247	0.644094	sp.Q8WZA9.IRGQ_HUMAN	0.604322	0.131625	0.854586	0.119125	0.985167	0.0124993	Scaling	Scaling	Buffering	Anti-Scaling
IRS2	0.0726942	1.4007	0.82584	0.0873156	0.102587	1.31338	sp.Q9Y4H2.IRS2_HUMAN	0.160835	0.724272	0.61121	-0.203215	0.127213	0.927487	Scaling	Buffering	Scaling	Buffering
ISCA1	0.1634	-0.176854	0.0334971	-0.964838	0.0600546	0.787984	sp.Q9BUE6.ISCA1_HUMAN	0.142775	0.443841	0.240216	-0.42424	0.0571557	0.868081	Anti-Scaling	Scaling	Scaling	Scaling
ISCA2	0.591279	0.229701	0.0143172	-0.55855	0.118678	0.788251	sp.Q86U28.ISCA2_HUMAN	0.126179	0.651305	0.00244293	-0.750344	0.0100101	1.40165	Buffering	Scaling	Scaling	Scaling
ISCU	0.0198407	0.930053	0.0531804	-0.514888	0.0027731	1.44494	sp.Q9H1K1.ISCU_HUMAN	0.0679954	0.938772	0.858465	-0.0859883	0.127935	1.02476	Scaling	Scaling	Scaling	Buffering
ISOC2	0.039636	0.360519	0.546502	0.229216	0.729785	0.131303	sp.Q96AB3.ISOC2_HUMAN	0.92903	0.0220898	0.253993	0.247333	0.436954	-0.225243	Scaling	Anti-Scaling	Buffering	Anti-Scaling
IST1	0.749148	-0.141422	0.00291419	-0.417522	0.544685	0.276099	sp.P53990.5.IST1_HUMAN	0.955034	-0.0155915	0.0520941	-0.452535	0.204434	0.436943	Anti-Scaling	Scaling	Buffering	Scaling
ISYNA1	0.000821475	-2.26628	0.397965	-1.41852	0.591503	-0.847754	sp.Q9NPH2.INO1_HUMAN	0.0173852	-1.15328	0.119118	-0.705378	0.314459	-0.447901	Anti-Scaling	Scaling	Anti-Scaling	Scaling
ITFG1	0.267676	0.269235	0.176107	-0.462212	0.0696876	0.731448	sp.Q8TB96.TIP_HUMAN	0.943283	0.0125931	0.715306	-0.113824	0.7069	0.126418	Scaling	Scaling	Buffering	Buffering
ITFG2	0.00097102	0.492829	0.00142127	-0.315265	1.44342e-05	0.808094	sp.Q969R8.ITFG2_HUMAN	0.149465	0.272525	0.643266	0.134517	0.66316	0.138008	Scaling	Scaling	Scaling	Anti-Scaling
ITGA5	0.106562	-1.51288	0.367488	0.835555	0.0673636	-2.34844	sp.P08648.ITA5_HUMAN	0.622982	-0.198057	0.586004	-0.383341	0.802278	0.185284	Anti-Scaling	Anti-Scaling	Anti-Scaling	Scaling
ITGB1	0.08484	1.13761	0.451937	-0.28798	0.0462506	1.42559	sp.P05556.ITB1_HUMAN	0.152304	0.598727	0.0360632	-0.47779	0.0279327	1.07652	Scaling	Scaling	Scaling	Scaling
ITGB8	0.0103897	1.25206	0.803508	-0.232806	0.1766	1.48486	sp.P26012.ITB8_HUMAN	0.0663362	0.829768	0.873264	-0.289643	0.553161	1.11941	Scaling	Buffering	Scaling	Scaling
ITIH2	0.372512	-0.131669	0.240162	-0.169524	0.364108	0.037855	sp.P19823.ITIH2_HUMAN	0.267558	0.260295	0.95428	0.01398	0.403271	0.246315	Anti-Scaling	Buffering	Scaling	Buffering
ITM2B	0.0997038	-0.596621	0.00458526	-0.719112	0.730389	0.122491	sp.Q9Y287.ITM2B_HUMAN	0.135139	-0.662999	0.205597	-0.4864	0.730355	-0.1766	Anti-Scaling	Scaling	Anti-Scaling	Scaling
ITPA	0.03519	0.423691	0.00460233	-0.694483	0.000316779	1.11817	sp.Q9BY32.ITPA_HUMAN	0.724625	0.0992151	0.175998	-0.588657	0.160899	0.687872	Scaling	Scaling	Buffering	Scaling
ITPK1	0.987012	0.011102	0.381883	-0.545054	0.530049	0.556156	sp.Q13572.ITPK1_HUMAN	0.8161	-0.101024	0.0965391	-0.681079	0.294768	0.580055	Buffering	Scaling	Anti-Scaling	Scaling
ITPKC	0.267267	0.41638	0.939464	0.0367032	0.514137	0.379676	sp.Q96DU7.IP3KC_HUMAN	0.427126	0.285603	0.160686	0.475813	0.646286	-0.190211	Scaling	Buffering	Scaling	Anti-Scaling
ITPR2	0.12981	0.704438	0.253956	-1.08726	0.0974084	1.79169	sp.Q14571.ITPR2_HUMAN	0.344986	0.181803	0.4731	-0.408254	0.330262	0.590057	Scaling	Scaling	Buffering	Scaling
ITPRIPL2	0.322135	0.939933	0.0271799	-0.9	0.108018	1.83993	sp.Q3MIP1.IPIL2_HUMAN	0.527709	0.708563	0.320128	-0.413366	0.354362	1.12193	Scaling	Scaling	Scaling	Scaling
ITSN2	0.565246	-0.152687	0.0284046	-0.530868	0.227367	0.378181	sp.Q9NZM3.ITSN2_HUMAN	0.832799	0.051617	0.617835	-0.184134	0.57654	0.235751	Anti-Scaling	Scaling	Buffering	Buffering
JAG1	0.689938	0.263857	0.511023	-0.413511	0.42066	0.677369	sp.P78504.JAG1_HUMAN	0.162879	0.681484	0.99626	-0.00212794	0.25145	0.683612	Scaling	Scaling	Scaling	Buffering
JAG2	0.685512	-0.470157	0.00313054	-2.00031	0.23759	1.53015	sp.Q9Y219.JAG2_HUMAN	0.273716	0.710921	0.283565	-0.572508	0.105463	1.28343	Anti-Scaling	Scaling	Scaling	Scaling
JAM3	0.000249771	-1.13931	0.85087	0.15362	0.137479	-1.29293	sp.Q9BX67.JAM3_HUMAN	0.342159	-0.43152	0.76272	0.231814	0.427487	-0.663334	Anti-Scaling	Anti-Scaling	Anti-Scaling	Anti-Scaling
JDP2	0.154116	-1.88346	0.0690181	-0.533667	0.280194	-1.34979	sp.Q8WYK2.2.JDP2_HUMAN	0.361769	-0.592099	0.12655	-0.592707	0.999235	0.000608429	Anti-Scaling	Scaling	Anti-Scaling	Scaling
JUNB	0.158842	0.246616	0.897954	0.135491	0.915787	0.111126	sp.P17275.JUNB_HUMAN	0.312301	-0.793148	0.358249	0.183456	0.237825	-0.976604	Buffering	Anti-Scaling	Anti-Scaling	Anti-Scaling
JUND	0.125208	1.20798	0.00197911	-0.79828	0.0472892	2.00626	sp.P17535.JUND_HUMAN	0.850633	0.132313	0.235584	-0.477863	0.439662	0.610176	Scaling	Scaling	Buffering	Scaling
KANK1	0.375274	0.665097	0.646743	0.229226	0.591449	0.43587	sp.Q14678.KANK1_HUMAN	0.897154	-0.0552561	0.419144	0.272913	0.516888	-0.32817	Scaling	Anti-Scaling	Buffering	Anti-Scaling
KANK2	0.253087	-1.58249	0.869958	0.0935222	0.232331	-1.67602	sp.Q63ZY3.2.KANK2_HUMAN	0.394325	-0.896185	0.142405	-0.217102	0.500828	-0.679083	Anti-Scaling	Buffering	Anti-Scaling	Buffering
KANSL2	0.00382191	0.540979	0.807707	0.149464	0.54411	0.391515	sp.Q9H9L4.KANL2_HUMAN	0.502275	0.309281	0.560922	-0.144589	0.369138	0.45387	Scaling	Anti-Scaling	Scaling	Buffering
KARS	0.0293145	0.748422	0.0751589	-0.305223	0.00601873	1.05364	sp.Q15046.SYK_HUMAN	0.0372597	0.549124	0.783408	-0.0569956	0.049351	0.60612	Scaling	Scaling	Scaling	Buffering
KAT5	0.467434	0.16975	0.424025	0.121286	0.851589	0.0484644	sp.Q92993.3.KAT5_HUMAN	0.542182	0.105708	0.521695	-0.141839	0.344679	0.247547	Buffering	Anti-Scaling	Buffering	Buffering
KAT6A	0.00634198	0.589565	0.735862	-0.0830833	0.0300041	0.672648	sp.Q92794.KAT6A_HUMAN	0.0991452	0.295538	0.781616	0.0545571	0.316145	0.240981	Scaling	Buffering	Scaling	Buffering
KAT8	0.0755492	0.312647	0.556734	-0.207942	0.173887	0.520589	sp.Q9H7Z6.KAT8_HUMAN	0.297126	-0.229624	0.510428	0.125499	0.18194	-0.355123	Scaling	Buffering	Anti-Scaling	Anti-Scaling
KATNA1	0.624078	0.315168	0.0596812	-0.569606	0.242207	0.884774	sp.O75449.KTNA1_HUMAN	0.173097	0.49168	0.200332	0.29655	0.564167	0.19513	Scaling	Scaling	Scaling	Anti-Scaling
KATNAL1	0.814897	-0.121365	0.243181	-0.556505	0.513675	0.43514	sp.Q9BW62.KATL1_HUMAN	0.292942	0.45536	0.658193	-0.163089	0.252792	0.618448	Anti-Scaling	Scaling	Scaling	Buffering
KATNB1	0.0410209	0.407815	0.00388428	-0.720634	0.000374083	1.12845	sp.Q9BVA0.KTNB1_HUMAN	0.0959388	0.322809	0.171896	-0.228624	0.0238399	0.551433	Scaling	Scaling	Scaling	Buffering
KBTBD11	0.0290268	1.50377	7.73058e-10	-1.22802	0.000617332	2.73179	sp.O94819.KBTBB_HUMAN	0.00428221	1.80731	0.000292297	-1.24508	5.89347e-05	3.05239	Scaling	Scaling	Scaling	Scaling
KBTBD2	0.00150448	0.531124	0.0031088	-0.816277	1.09728e-05	1.3474	sp.Q8IY47.KBTB2_HUMAN	0.168532	0.302197	0.101875	-0.591051	0.0279606	0.893248	Scaling	Scaling	Scaling	Scaling
KBTBD6	0.973716	-0.0106564	0.0106566	-0.649979	0.10704	0.639323	sp.Q86V97.KBTB6_HUMAN	0.144443	-0.815875	0.336977	-0.551465	0.686648	-0.26441	Buffering	Scaling	Anti-Scaling	Scaling
KBTBD7	0.78806	0.084183	0.181422	-0.349814	0.261742	0.433997	sp.Q8WVZ9.KBTB7_HUMAN	0.821898	-0.144647	0.0172176	-1.0203	0.242901	0.875656	Buffering	Scaling	Anti-Scaling	Scaling
KCMF1	0.348363	0.351447	0.728984	-0.0846807	0.304231	0.436128	sp.Q9P0J7.KCMF1_HUMAN	0.559986	-0.255372	0.99888	0.000551256	0.645383	-0.255924	Scaling	Buffering	Anti-Scaling	Buffering
KCTD10	0.936328	0.030276	0.548145	-0.293953	0.57457	0.324229	sp.Q9H3F6.BACD3_HUMAN	0.722848	0.122006	0.94114	0.0403864	0.894061	0.0816196	Buffering	Scaling	Buffering	Buffering
KCTD12	0.897472	-0.0556627	0.596082	0.238719	0.607724	-0.294382	sp.Q96CX2.KCD12_HUMAN	0.0469669	0.664439	0.293347	0.63	0.954485	0.0344387	Buffering	Anti-Scaling	Scaling	Anti-Scaling
KCTD13	0.385871	-0.466678	0.15353	-0.471679	0.992697	0.00500028	sp.Q8WZ19.BACD1_HUMAN	0.705761	-0.19366	0.0903255	-0.401366	0.698331	0.207706	Anti-Scaling	Scaling	Anti-Scaling	Scaling
KCTD15	0.632309	0.420301	0.412472	-1.15087	0.316011	1.57117	sp.Q96SI1.KCD15_HUMAN	0.952904	-0.0319701	0.993361	0.00489878	0.960962	-0.0368689	Scaling	Scaling	Buffering	Buffering
KCTD21	0.353861	-0.169196	0.0196707	0.493545	0.0127467	-0.662741	sp.Q4G0X4.KCD21_HUMAN	0.747412	0.102108	0.244421	0.465625	0.442142	-0.363517	Anti-Scaling	Anti-Scaling	Buffering	Anti-Scaling
KCTD5	0.259851	0.800341	0.0440707	-0.727663	0.0720036	1.528	sp.Q9NXV2.KCTD5_HUMAN	0.79207	0.14778	0.361329	-0.290065	0.48924	0.437845	Scaling	Scaling	Buffering	Scaling
KCTD9	0.0479439	0.297318	0.166971	-0.324284	0.0205424	0.621602	sp.Q7L273.KCTD9_HUMAN	0.246391	0.301275	0.431362	0.108448	0.480956	0.192827	Scaling	Scaling	Scaling	Anti-Scaling
KDELC1	0.0718235	-1.5897	0.167261	-0.668785	0.299596	-0.920912	sp.Q6UW63.KDEL1_HUMAN	0.0588884	-0.961626	0.272889	-0.412643	0.316311	-0.548983	Anti-Scaling	Scaling	Anti-Scaling	Scaling
KDELC2	0.740969	-0.287043	0.51786	-0.452611	0.875121	0.165568	sp.Q7Z4H8.KDEL2_HUMAN	0.770541	0.167876	0.52483	-0.293358	0.511215	0.461234	Anti-Scaling	Scaling	Buffering	Scaling
KDELR1	0.475836	0.37455	0.561762	-0.556855	0.384978	0.931405	sp.P24390.ERD21_HUMAN	0.391155	0.189012	0.556632	-0.413799	0.416783	0.602811	Scaling	Scaling	Buffering	Scaling
KDM2A	0.0343729	0.450661	0.564353	0.100825	0.142818	0.349836	sp.Q9Y2K7.KDM2A_HUMAN	0.331616	0.202894	0.464356	-0.127994	0.202594	0.330888	Scaling	Anti-Scaling	Buffering	Buffering
KDM2B	0.27779	-0.458802	0.608036	-0.356661	0.889581	-0.10214	sp.Q8NHM5.KDM2B_HUMAN	0.416589	-0.319006	0.202548	-0.298386	0.957205	-0.0206199	Anti-Scaling	Scaling	Anti-Scaling	Scaling
KDM3A	0.0262527	0.514817	0.90979	0.0439936	0.282065	0.470823	sp.Q9Y4C1.KDM3A_HUMAN	0.112127	0.705204	0.808318	0.118462	0.32814	0.586741	Scaling	Buffering	Scaling	Anti-Scaling
KDM5A	0.0813562	0.286657	0.325576	-0.33965	0.119907	0.626307	sp.P29375.KDM5A_HUMAN	0.115569	-0.191021	0.528562	0.305661	0.342774	-0.496682	Scaling	Scaling	Anti-Scaling	Anti-Scaling
KEAP1	0.866451	-0.0361277	0.920055	0.0386557	0.857811	-0.0747833	sp.Q14145.KEAP1_HUMAN	0.374596	-0.68747	0.587139	-0.33803	0.686176	-0.34944	Buffering	Buffering	Anti-Scaling	Scaling
KHK	0.708719	0.408491	0.638303	-0.440117	0.537368	0.848609	sp.P50053.KHK_HUMAN	0.678891	-0.22673	0.969564	-0.053915	0.906808	-0.172815	Scaling	Scaling	Anti-Scaling	Buffering
KHNYN	0.0209874	0.72051	0.0295805	-0.957119	0.00197412	1.67763	sp.O15037.KHNYN_HUMAN	0.056788	0.335889	0.000197682	-0.660825	0.000249802	0.996714	Scaling	Scaling	Scaling	Scaling
KHSRP	0.00740233	0.184373	0.478612	-0.604943	0.376331	0.789316	sp.Q92945.FUBP2_HUMAN	0.914949	0.0996025	0.849211	-0.0463361	0.877906	0.145939	Buffering	Scaling	Buffering	Buffering
KIAA0391	0.201683	0.472346	0.0175634	-0.481049	0.032528	0.953395	sp.O15091.MRRP3_HUMAN	0.552085	0.228252	0.454613	-0.124571	0.386441	0.352824	Scaling	Scaling	Buffering	Buffering
KIAA1217	0.751051	-0.213729	0.391014	-0.375752	0.828428	0.162023	sp.Q5T5P2.SKT_HUMAN	0.976775	0.0282119	0.293902	-0.374884	0.689395	0.403095	Anti-Scaling	Scaling	Buffering	Scaling
KIAA1551	0.74256	0.0913471	0.706944	-0.344229	0.643278	0.435576	sp.Q9HCM1.K1551_HUMAN	0.718113	0.114267	0.993598	0.00404986	0.843427	0.110218	Buffering	Scaling	Buffering	Buffering
KIDINS220	0.563672	0.247446	0.68921	-0.143276	0.457796	0.390722	sp.Q9ULH0.4.KDIS_HUMAN	0.262452	0.617174	0.847499	0.0581645	0.334268	0.55901	Buffering	Buffering	Scaling	Buffering
KIF13B	0.196021	0.431914	0.544464	0.180201	0.52462	0.251713	sp.Q9NQT8.KI13B_HUMAN	0.205717	0.31434	0.869671	0.0336573	0.328821	0.280683	Scaling	Anti-Scaling	Scaling	Buffering
KIF16B	0.203828	0.259022	0.155801	-0.508179	0.0497099	0.767201	sp.Q96L93.2.KI16B_HUMAN	0.00408179	0.386772	0.369493	-0.157511	0.01003	0.544283	Scaling	Scaling	Scaling	Buffering
KIF16B	0.203828	0.259022	0.155801	-0.508179	0.0497099	0.767201	sp.Q96L93.KI16B_HUMAN	0.382024	-0.292997	0.788264	-0.115247	0.713384	-0.17775	Scaling	Scaling	Anti-Scaling	Buffering
KIF1C	0.903281	0.041916	0.00131359	-1.63605	0.00635819	1.67796	sp.O43896.KIF1C_HUMAN	0.105626	0.332748	0.0177127	-0.865719	0.00362129	1.19847	Buffering	Scaling	Scaling	Scaling
KIF21A	0.215004	1.38668	0.392129	0.514633	0.429352	0.872048	sp.Q7Z4S6.4.KI21A_HUMAN	0.429059	0.467576	0.0793377	0.683538	0.718379	-0.215962	Scaling	Anti-Scaling	Scaling	Anti-Scaling
KIF22	0.184331	-0.537886	0.0756174	-0.442953	0.795495	-0.0949331	sp.Q14807.KIF22_HUMAN	0.818989	-0.0833982	0.530136	-0.159666	0.853271	0.0762674	Anti-Scaling	Scaling	Buffering	Buffering
KIF3C	0.218396	1.09833	0.714536	-0.348434	0.242772	1.44676	sp.O14782.KIF3C_HUMAN	0.505398	0.233319	0.278817	0.380239	0.736494	-0.14692	Scaling	Scaling	Buffering	Anti-Scaling
KIF5A	0.383974	-0.308021	0.46286	-0.302057	0.989666	-0.00596451	sp.Q12840.KIF5A_HUMAN	0.747704	0.0566528	0.145192	-0.222348	0.19039	0.279001	Anti-Scaling	Scaling	Buffering	Buffering
KIF5B	0.125954	0.566476	0.0129615	-0.483251	0.017706	1.04973	sp.P33176.KINH_HUMAN	0.121137	0.355733	0.289556	-0.131388	0.0522827	0.487121	Scaling	Scaling	Scaling	Buffering
KIFC3	0.00286587	1.70712	0.940347	-0.0375443	0.00906669	1.74466	sp.Q9BVG8.KIFC3_HUMAN	0.041966	1.19761	0.927306	0.0446924	0.091955	1.15292	Scaling	Buffering	Scaling	Buffering
KIN	0.104392	0.334483	0.0346102	-0.398211	0.0069434	0.732693	sp.O60870.KIN17_HUMAN	0.614476	0.141986	2.32784e-05	-0.627787	0.0361447	0.769773	Scaling	Scaling	Buffering	Scaling
KLC1	0.0963759	0.791343	0.271305	-0.370642	0.0379656	1.16198	sp.Q07866.6.KLC1_HUMAN	0.607587	0.185014	0.203779	-0.443186	0.193548	0.6282	Scaling	Scaling	Buffering	Scaling
KLC2	0.989359	-0.0030302	0.339556	0.333245	0.388679	-0.336275	sp.Q9H0B6.KLC2_HUMAN	0.506552	0.159191	0.253157	0.390191	0.54866	-0.231	Buffering	Anti-Scaling	Buffering	Anti-Scaling
KLF12	0.673806	-0.225731	0.549443	0.248869	0.464128	-0.4746	sp.Q9Y4X4.KLF12_HUMAN	0.0450891	1.1363	0.405747	-0.419164	0.0214927	1.55546	Anti-Scaling	Anti-Scaling	Scaling	Scaling
KLF16	0.384527	0.412126	0.528365	-0.378955	0.27876	0.791081	sp.Q9BXK1.KLF16_HUMAN	0.719635	0.280521	0.661743	-0.402399	0.547862	0.682921	Scaling	Scaling	Scaling	Scaling
KLF5	0.254057	-1.14438	0.640526	-0.323325	0.460596	-0.821056	sp.Q13887.KLF5_HUMAN	0.161174	-0.709454	0.747913	-0.202167	0.493956	-0.507287	Anti-Scaling	Scaling	Anti-Scaling	Buffering
KLHDC2	0.0409299	0.763269	0.0306658	-0.688018	0.00265079	1.45129	sp.Q9Y2U9.KLDC2_HUMAN	0.457929	0.0759787	0.464591	-0.117468	0.25424	0.193447	Scaling	Scaling	Buffering	Buffering
KLHDC4	0.458553	-0.189352	0.122252	-0.398704	0.528145	0.209352	sp.Q8TBB5.KLDC4_HUMAN	0.0675489	0.320802	0.222966	0.27596	0.852545	0.0448414	Anti-Scaling	Scaling	Scaling	Anti-Scaling
KLHL36	0.276636	-0.394465	0.0723064	-0.591878	0.648782	0.197413	sp.Q8N4N3.KLH36_HUMAN	0.797248	0.0655479	0.689053	-0.160328	0.611258	0.225876	Anti-Scaling	Scaling	Buffering	Buffering
KLHL7	0.000147376	0.577606	0.0846155	-0.937519	0.0214506	1.51513	sp.Q8IXQ5.KLHL7_HUMAN	0.00150092	0.341633	0.403676	-0.33766	0.142029	0.679293	Scaling	Scaling	Scaling	Scaling
KLK6	0.350564	1.53278	0.408152	-0.717763	0.211696	2.25054	sp.Q92876.KLK6_HUMAN	0.324575	1.16232	0.920278	-0.0222304	0.314818	1.18456	Scaling	Scaling	Scaling	Buffering
KMT2A	0.0163252	0.386572	0.016757	-0.575192	0.000967037	0.961764	sp.Q03164.3.KMT2A_HUMAN	0.100869	0.383961	0.00476857	-0.482076	0.0040658	0.866038	Scaling	Scaling	Scaling	Scaling
KMT2B	0.153519	0.352433	0.848921	0.0463726	0.34173	0.30606	sp.Q9UMN6.KMT2B_HUMAN	0.393598	0.225759	0.327174	-1.28001	0.266737	1.50577	Scaling	Buffering	Buffering	Scaling
KMT2D	0.546752	0.189629	0.742282	0.214174	0.9713	-0.0245453	sp.O14686.3.KMT2D_HUMAN	0.0198595	0.344524	0.307368	0.339191	0.985546	0.00533295	Buffering	Anti-Scaling	Scaling	Anti-Scaling
KNOP1	0.133294	0.367304	0.00585093	-0.828266	0.00215786	1.19557	sp.Q1ED39.KNOP1_HUMAN	0.259184	0.53711	0.0032724	-0.501703	0.082185	1.03881	Scaling	Scaling	Scaling	Scaling
KNTC1	0.108575	0.660899	0.53688	-0.402585	0.179063	1.06348	sp.P50748.KNTC1_HUMAN	0.964191	-0.0193953	0.528053	-0.397419	0.595153	0.378023	Scaling	Scaling	Buffering	Scaling
KPNA3	0.667571	-0.109554	0.024917	-0.449401	0.262668	0.339847	sp.O00505.IMA4_HUMAN	0.439005	0.195194	0.115248	-0.364729	0.0884	0.559923	Anti-Scaling	Scaling	Buffering	Scaling
KRAS	0.0929486	0.335088	0.218047	-0.616351	0.0930732	0.951438	sp.P01116.2.RASK_HUMAN	0.190283	-0.250081	0.01516	-0.905803	0.0483806	0.655722	Scaling	Scaling	Anti-Scaling	Scaling
KRI1	0.276557	0.475292	0.762042	-0.195499	0.372741	0.670791	sp.Q8N9T8.KRI1_HUMAN	0.794902	0.0641986	0.431597	-0.390042	0.387423	0.454241	Scaling	Buffering	Buffering	Scaling
KRR1	0.17584	0.447028	0.257139	-0.341245	0.0664413	0.788272	sp.Q13601.KRR1_HUMAN	0.515713	-0.117807	0.625957	0.205272	0.473235	-0.323079	Scaling	Scaling	Anti-Scaling	Anti-Scaling
KTN1	0.0368376	1.10952	0.957884	-0.0133021	0.0350844	1.12282	sp.Q86UP2.KTN1_HUMAN	0.381149	0.363061	0.352126	0.151908	0.61283	0.211153	Scaling	Buffering	Scaling	Anti-Scaling
KXD1	0.501693	0.230592	0.149296	-0.541543	0.10793	0.772135	sp.Q9BQD3.KXDL1_HUMAN	0.112127	0.449671	0.153828	0.278968	0.49022	0.170702	Buffering	Scaling	Scaling	Anti-Scaling
L2HGDH	0.00683102	0.853956	0.00515893	-1.39814	0.000222077	2.25209	sp.Q9H9P8.L2HDH_HUMAN	0.0161233	0.858541	0.00302413	-0.817537	0.000335559	1.67608	Scaling	Scaling	Scaling	Scaling
L3HYPDH	0.29337	0.60271	0.159588	0.493264	0.855399	0.109447	sp.Q96EM0.T3HPD_HUMAN	0.783728	-0.193299	0.144423	0.732509	0.270647	-0.925808	Scaling	Anti-Scaling	Anti-Scaling	Anti-Scaling
L3MBTL3	0.5322	-0.58734	0.609414	-0.253305	0.733792	-0.334035	sp.Q96JM7.2.LMBL3_HUMAN	0.855165	-0.135468	0.632253	0.184208	0.691684	-0.319676	Anti-Scaling	Scaling	Anti-Scaling	Anti-Scaling
LAMA1	0.0269477	-0.938601	0.691306	0.243859	0.0937388	-1.18246	sp.P25391.LAMA1_HUMAN	0.024534	-0.567602	0.131779	-0.425535	0.624754	-0.142067	Anti-Scaling	Anti-Scaling	Anti-Scaling	Scaling
LAMA4	0.254101	-0.912119	0.833669	-0.178153	0.473166	-0.733967	sp.Q16363.2.LAMA4_HUMAN	0.0549638	-0.622351	0.89829	-0.0731307	0.367968	-0.549221	Anti-Scaling	Buffering	Anti-Scaling	Buffering
LAMP1	0.725546	0.157225	0.206488	-0.368998	0.306767	0.526223	sp.P11279.LAMP1_HUMAN	0.0824735	0.540373	0.515213	-0.107782	0.0504546	0.648155	Buffering	Scaling	Scaling	Buffering
LAMTOR1	0.0233357	0.382239	0.953181	-0.0140846	0.15377	0.396324	sp.Q6IAA8.LTOR1_HUMAN	0.140699	0.344466	0.612525	0.0915404	0.340888	0.252925	Scaling	Buffering	Scaling	Buffering
LANCL2	0.0135709	0.410063	0.00790575	-0.900576	0.00111274	1.31064	sp.Q9NS86.LANC2_HUMAN	0.0436748	0.316825	0.26145	-0.623645	0.125239	0.94047	Scaling	Scaling	Scaling	Scaling
LARP4	0.186886	0.56677	0.25876	-0.189396	0.104383	0.756166	sp.Q71RC2.4.LARP4_HUMAN	0.0768599	0.531184	0.00925035	-0.571671	0.00746769	1.10286	Scaling	Buffering	Scaling	Scaling
LARP4B	0.543264	0.188198	5.5675e-06	-0.845751	0.0162397	1.03395	sp.Q92615.LAR4B_HUMAN	0.994346	0.000706687	0.000992496	-0.732634	0.00107995	0.73334	Buffering	Scaling	Buffering	Scaling
LARP4B	0.543264	0.188198	5.5675e-06	-0.845751	0.0162397	1.03395	tr.H0Y4V9.H0Y4V9_HUMAN	0.320923	0.280481	0.0630229	-0.797353	0.0291402	1.07783	Buffering	Scaling	Scaling	Scaling
LAYN	0.488333	-0.519269	0.33164	0.932526	0.210672	-1.4518	sp.Q6UX15.2.LAYN_HUMAN	0.975854	0.0438244	0.971095	-0.0353996	0.956345	0.0792239	Anti-Scaling	Anti-Scaling	Buffering	Buffering
LCLAT1	0.2572	0.344688	0.458568	-0.253027	0.171463	0.597716	sp.Q6UWP7.LCLT1_HUMAN	0.114116	0.496409	0.712884	-0.150307	0.195709	0.646716	Scaling	Scaling	Scaling	Buffering
LCMT1	0.0735242	0.61867	0.0149838	-0.361183	0.0147025	0.979853	sp.Q9UIC8.LCMT1_HUMAN	0.122723	0.285329	0.87558	-0.0334152	0.202896	0.318745	Scaling	Scaling	Scaling	Buffering
LCN2	0.0219604	4.37796	0.787739	0.308351	0.0413841	4.06961	sp.P80188.NGAL_HUMAN	0.0130337	2.68011	0.948316	0.0335881	0.0150422	2.64652	Scaling	Anti-Scaling	Scaling	Buffering
LCP1	0.1802	2.30893	0.649649	0.433837	0.305023	1.87509	sp.P13796.PLSL_HUMAN	0.0885222	1.98822	0.692386	0.200141	0.131181	1.78808	Scaling	Anti-Scaling	Scaling	Anti-Scaling
LDHB	0.00627726	0.702948	0.997916	-0.00206329	0.414507	0.705012	sp.P07195.LDHB_HUMAN	0.023976	0.597175	0.751126	-0.0993892	0.0966645	0.696564	Scaling	Buffering	Scaling	Buffering
LDHD	0.806778	0.121645	0.0520079	-0.5378	0.230497	0.659444	sp.Q86WU2.LDHD_HUMAN	0.279159	0.541176	0.646643	-0.204685	0.226267	0.74586	Buffering	Scaling	Scaling	Buffering
LDLR	0.400395	-0.179367	0.587981	-1.00841	0.651843	0.829045	sp.P01130.LDLR_HUMAN	0.000684509	-1.65415	0.331257	-1.27026	0.73963	-0.383889	Anti-Scaling	Scaling	Anti-Scaling	Scaling
LEMD3	0.56413	0.279723	0.362293	-0.0794837	0.466696	0.359207	sp.Q9Y2U8.MAN1_HUMAN	0.252312	0.354145	0.256474	-0.228051	0.105692	0.582196	Scaling	Buffering	Scaling	Buffering
LENG1	0.0501454	0.336884	0.268845	-0.518623	0.115722	0.855507	sp.Q96BZ8.LENG1_HUMAN	0.664992	-0.126521	0.0848853	-0.744386	0.142711	0.617865	Scaling	Scaling	Anti-Scaling	Scaling
LENG8	0.48804	0.164334	0.969395	0.0230431	0.821784	0.141291	sp.Q96PV6.2.LENG8_HUMAN	0.430089	-0.184839	0.128197	-0.172567	0.958272	-0.0122718	Buffering	Buffering	Anti-Scaling	Buffering
LENG9	0.974692	0.0134431	0.935541	-0.0874136	0.928965	0.100857	sp.Q96B70.LENG9_HUMAN	0.844337	0.110684	0.226916	-1.56344	0.199052	1.67412	Buffering	Buffering	Buffering	Scaling
LEPROTL1	0.0628496	0.50059	0.0473564	-0.572392	0.00520066	1.07298	tr.E5RHU8.E5RHU8_HUMAN	0.886254	0.0498017	0.955621	0.012542	0.919176	0.0372597	Scaling	Scaling	Buffering	Buffering
LETMD1	0.0480742	0.779713	0.916725	0.041051	0.158457	0.738662	sp.Q6P1Q0.7.LTMD1_HUMAN	0.059847	0.76459	0.516519	-0.349369	0.113251	1.11396	Scaling	Buffering	Scaling	Scaling
LGALS3	0.439411	1.25661	0.051068	1.60021	0.835459	-0.343596	sp.P17931.LEG3_HUMAN	0.466306	0.371767	0.475075	0.275702	0.863121	0.0960655	Scaling	Anti-Scaling	Scaling	Anti-Scaling
LGALSL	0.0712271	1.07628	0.515805	-0.482818	0.0972604	1.5591	sp.Q3ZCW2.LEGL_HUMAN	0.448369	0.710935	0.933929	0.0272422	0.476167	0.683693	Scaling	Scaling	Scaling	Buffering
LGMN	0.7005	0.583345	0.898054	0.0433747	0.721842	0.53997	sp.Q99538.LGMN_HUMAN	0.354728	0.653878	0.47885	0.139673	0.454413	0.514205	Scaling	Buffering	Scaling	Anti-Scaling
LIG1	0.0395127	0.703921	0.355537	-0.152996	0.0207558	0.856917	sp.P18858.DNLI1_HUMAN	0.932654	0.0420142	0.291853	-0.241857	0.589951	0.283871	Scaling	Buffering	Buffering	Buffering
LIG4	0.00539857	0.567254	0.0489473	-0.496227	0.000797601	1.06348	sp.P49917.DNLI4_HUMAN	0.0155535	0.344625	0.226512	-0.244184	0.0121157	0.588809	Scaling	Scaling	Scaling	Buffering
LIMA1	0.715736	0.290531	0.912328	0.17999	0.949518	0.110541	sp.Q9UHB6.LIMA1_HUMAN	0.410741	0.691312	0.652231	1.01335	0.887182	-0.322036	Scaling	Anti-Scaling	Scaling	Anti-Scaling
LIMA1	0.715736	0.290531	0.912328	0.17999	0.949518	0.110541	sp.Q9UHB6.4.LIMA1_HUMAN	0.254573	0.832316	0.810871	0.219252	0.571151	0.613064	Scaling	Anti-Scaling	Scaling	Anti-Scaling
LIN28B	0.655478	0.687416	0.992451	-0.00651791	0.669281	0.693934	sp.Q6ZN17.LN28B_HUMAN	0.328419	1.50581	0.723408	-0.416614	0.27949	1.92242	Scaling	Buffering	Scaling	Scaling
LIN37	0.198148	0.243532	0.065151	-0.377769	0.0173163	0.621301	sp.Q96GY3.LIN37_HUMAN	0.448365	-0.229193	0.250951	-0.376312	0.698289	0.14712	Buffering	Scaling	Anti-Scaling	Scaling
LIN52	0.409206	0.279511	0.0795441	-0.550082	0.0666288	0.829593	sp.Q52LA3.LIN52_HUMAN	0.107485	0.248732	0.000629379	-0.880774	0.000222675	1.12951	Scaling	Scaling	Buffering	Scaling
LIN7A	0.263991	1.67644	0.000510049	-0.750117	0.140886	2.42656	sp.O14910.LIN7A_HUMAN	0.052848	1.13845	0.145214	-0.628572	0.0136927	1.76702	Scaling	Scaling	Scaling	Scaling
LIPT2	0.610482	0.110294	0.353782	-0.231904	0.270326	0.342199	sp.A6NK58.LIPT2_HUMAN	0.439078	0.225425	0.272179	-0.356312	0.152057	0.581737	Buffering	Buffering	Buffering	Scaling
LLGL1	0.212828	0.786464	0.00110891	-1.05663	0.0306208	1.84309	sp.Q15334.L2GL1_HUMAN	0.270222	0.436958	0.000345409	-0.749442	0.0348679	1.1864	Scaling	Scaling	Scaling	Scaling
LLPH	0.02801	0.451413	0.90891	-0.0269674	0.126821	0.47838	sp.Q9BRT6.LLPH_HUMAN	0.145444	0.351406	0.642608	-0.254757	0.32567	0.606163	Scaling	Buffering	Scaling	Scaling
LMBRD1	0.411219	0.579494	0.100174	-0.435066	0.203535	1.01456	sp.Q9NUN5.LMBD1_HUMAN	0.351281	0.42505	0.00955417	-0.314743	0.166199	0.739793	Scaling	Scaling	Scaling	Scaling
LMNB2	0.0800587	-0.287445	0.375249	-0.489279	0.690392	0.201834	tr.J9JID7.J9JID7_HUMAN	0.939298	0.00629067	0.33574	-0.338524	0.329152	0.344815	Anti-Scaling	Scaling	Buffering	Scaling
LMO7	0.393595	-0.592892	0.843357	-0.109964	0.558641	-0.482927	sp.Q8WWI1.3.LMO7_HUMAN	0.314572	-0.541835	0.700172	-0.164916	0.554894	-0.37692	Anti-Scaling	Buffering	Anti-Scaling	Buffering
LMO7	0.393595	-0.592892	0.843357	-0.109964	0.558641	-0.482927	tr.H0YDG6.H0YDG6_HUMAN	0.341476	-0.558079	0.446868	0.36374	0.160709	-0.92182	Anti-Scaling	Buffering	Anti-Scaling	Anti-Scaling
LNX2	0.671157	0.092781	0.121022	-0.322993	0.13503	0.415774	sp.Q8N448.LNX2_HUMAN	0.627116	0.206991	0.566493	-0.160141	0.451851	0.367132	Buffering	Scaling	Buffering	Buffering
LONP1	0.147243	0.462509	0.112887	-0.755853	0.0318103	1.21836	sp.P36776.LONM_HUMAN	0.0782117	0.580822	0.754983	-0.222966	0.324894	0.803788	Scaling	Scaling	Scaling	Buffering
LONP2	0.921861	-0.015364	0.00704744	-0.853697	0.00957962	0.838333	sp.Q86WA8.LONP2_HUMAN	0.205354	0.346289	0.197638	-0.193098	0.0763392	0.539387	Buffering	Scaling	Scaling	Buffering
LOXL2	0.147491	-1.21589	0.0720055	1.30444	0.0127208	-2.52033	sp.Q9Y4K0.LOXL2_HUMAN	0.140554	-0.73716	0.511452	0.250826	0.0772601	-0.987986	Anti-Scaling	Anti-Scaling	Anti-Scaling	Anti-Scaling
LOXL3	0.365101	-0.650022	0.869511	-0.285798	0.84044	-0.364223	sp.P58215.LOXL3_HUMAN	0.512159	-0.346629	0.989658	-0.0278894	0.883804	-0.31874	Anti-Scaling	Scaling	Anti-Scaling	Buffering
LPAR1	0.356767	0.600693	0.255013	1.41885	0.522766	-0.818156	sp.Q92633.LPAR1_HUMAN	0.957908	-0.0622789	0.47454	0.727267	0.582623	-0.789546	Scaling	Anti-Scaling	Buffering	Anti-Scaling
LPCAT2	0.489175	0.534041	0.447326	0.274295	0.739699	0.259747	sp.Q7L5N7.PCAT2_HUMAN	0.451849	0.348045	0.174287	0.418454	0.882645	-0.0704091	Scaling	Anti-Scaling	Scaling	Anti-Scaling
LPCAT3	0.0504144	0.337525	0.0930008	-0.555483	0.0218876	0.893008	sp.Q6P1A2.MBOA5_HUMAN	0.766691	-0.0590161	0.0023701	-0.602539	0.0171343	0.543523	Scaling	Scaling	Buffering	Scaling
LPIN1	0.98985	-0.00672994	0.349482	0.204842	0.700579	-0.211571	sp.Q14693.2.LPIN1_HUMAN	0.520892	0.329749	0.301408	0.160552	0.738704	0.169197	Buffering	Anti-Scaling	Scaling	Anti-Scaling
LPIN2	0.776569	0.204371	0.11112	-0.932832	0.210409	1.1372	sp.Q92539.LPIN2_HUMAN	0.710185	0.280579	0.721779	0.119282	0.839535	0.161296	Buffering	Scaling	Scaling	Anti-Scaling
LPXN	0.646363	0.560206	0.173796	1.16944	0.663889	-0.609231	sp.O60711.2.LPXN_HUMAN	0.812025	0.230812	0.193215	0.88682	0.544282	-0.656008	Scaling	Anti-Scaling	Buffering	Anti-Scaling
LRCH1	0.219018	0.33254	0.584584	-0.133066	0.165602	0.465606	sp.Q9Y2L9.2.LRCH1_HUMAN	0.0477891	0.516516	0.41011	-0.200227	0.0297731	0.716743	Scaling	Buffering	Scaling	Buffering
LRP1	0.188811	-1.18925	0.291897	0.365981	0.11068	-1.55523	sp.Q07954.LRP1_HUMAN	0.587002	-0.224877	0.513381	-0.143575	0.842441	-0.0813026	Anti-Scaling	Anti-Scaling	Anti-Scaling	Buffering
LRP10	0.234711	0.641285	0.278952	0.347201	0.597685	0.294084	sp.Q7Z4F1.LRP10_HUMAN	0.951882	-0.0167944	0.0211828	1.19988	0.0250649	-1.21667	Scaling	Anti-Scaling	Buffering	Anti-Scaling
LRP5	0.81579	-0.277764	0.623748	-0.404631	0.928152	0.126868	sp.O75197.LRP5_HUMAN	0.946609	0.0448862	0.2714	0.363859	0.660335	-0.318973	Anti-Scaling	Scaling	Buffering	Anti-Scaling
LRPPRC	0.00825715	0.67049	0.15178	-0.660048	0.0244239	1.33054	sp.P42704.LPPRC_HUMAN	0.0848685	0.614737	0.0467511	-0.352578	0.0216362	0.967315	Scaling	Scaling	Scaling	Scaling
LRRC32	0.67144	0.307211	0.124584	0.968347	0.464881	-0.661137	sp.Q14392.LRC32_HUMAN	0.563525	1.07728	0.595152	-1.3644	0.417353	2.44168	Scaling	Anti-Scaling	Scaling	Scaling
LRRC8A	0.000884525	1.14315	0.902291	0.0540407	0.0521231	1.08911	sp.Q8IWT6.LRC8A_HUMAN	0.00303858	0.794515	0.770802	-0.10681	0.0539014	0.901325	Scaling	Buffering	Scaling	Buffering
LRSAM1	0.0065935	0.741968	0.549947	0.123965	0.0385565	0.618003	sp.Q6UWE0.LRSM1_HUMAN	0.796437	0.063873	0.551607	0.220213	0.711418	-0.15634	Scaling	Anti-Scaling	Buffering	Anti-Scaling
LSM1	0.131828	0.302072	0.656834	-0.13471	0.21751	0.436782	sp.O15116.LSM1_HUMAN	0.102391	0.375893	0.582565	-0.144306	0.11581	0.520199	Scaling	Buffering	Scaling	Buffering
LSM14A	0.141479	0.422416	0.981354	-0.00976318	0.384367	0.432179	sp.Q8ND56.2.LS14A_HUMAN	0.134136	-0.536298	0.762359	0.173824	0.297993	-0.710123	Scaling	Buffering	Anti-Scaling	Anti-Scaling
LSM4	0.713283	0.0610153	0.0233227	-0.319025	0.0929413	0.38004	sp.Q9Y4Z0.LSM4_HUMAN	0.0122814	0.654851	0.157309	-0.1617	0.0059451	0.816551	Buffering	Scaling	Scaling	Buffering
LSM5	0.0496276	0.279724	0.0486969	-0.772104	0.0148418	1.05183	sp.Q9Y4Y9.LSM5_HUMAN	0.72421	-0.091842	0.242802	-0.330802	0.429775	0.23896	Scaling	Scaling	Buffering	Scaling
LSM7	0.0503297	0.716537	0.709871	-0.327028	0.302791	1.04357	sp.Q9UK45.LSM7_HUMAN	0.894785	-0.12837	0.391276	-0.154835	0.978319	0.0264656	Scaling	Scaling	Anti-Scaling	Buffering
LSR	0.547343	0.880301	0.440923	-1.13372	0.30141	2.01402	sp.Q86X29.LSR_HUMAN	0.554275	0.503283	0.556671	-0.408291	0.373948	0.911573	Scaling	Scaling	Scaling	Scaling
LTA4H	0.370641	0.174982	0.785268	0.111988	0.88262	0.0629941	sp.P09960.LKHA4_HUMAN	0.40437	-0.274294	0.400361	0.487918	0.240445	-0.762212	Buffering	Anti-Scaling	Anti-Scaling	Anti-Scaling
LTBP1	0.502157	-0.541466	0.708819	-0.522153	0.989867	-0.0193127	sp.Q14766.LTBP1_HUMAN	0.717237	-0.180543	0.943914	-0.0752032	0.92617	-0.10534	Anti-Scaling	Scaling	Anti-Scaling	Buffering
LTBP3	0.539138	0.45418	0.0603672	1.20554	0.40162	-0.75136	sp.Q9NS15.LTBP3_HUMAN	0.354954	0.551229	0.071887	0.966324	0.562287	-0.415095	Scaling	Anti-Scaling	Scaling	Anti-Scaling
LTBR	0.827374	0.203435	0.46644	-0.446811	0.525469	0.650246	sp.P36941.TNR3_HUMAN	0.507601	0.420099	0.387288	-0.925643	0.255981	1.34574	Buffering	Scaling	Scaling	Scaling
LTV1	0.0769588	0.468141	0.0150973	-0.760316	0.00215606	1.22846	sp.Q96GA3.LTV1_HUMAN	0.813493	-0.0935449	0.221023	0.38695	0.331284	-0.480495	Scaling	Scaling	Buffering	Anti-Scaling
LUC7L	0.000460207	-0.787028	0.0127849	-0.69339	0.688598	-0.0936375	sp.Q9NQ29.LUC7L_HUMAN	0.995643	-0.00157024	0.0625715	-0.276952	0.389417	0.275382	Anti-Scaling	Scaling	Buffering	Scaling
LYPD3	0.443982	0.543375	0.477513	-0.409144	0.26677	0.952519	sp.O95274.LYPD3_HUMAN	0.355515	1.29066	0.793563	-0.242154	0.334789	1.53281	Scaling	Scaling	Scaling	Buffering
LYRM2	0.838057	-0.094566	0.394115	-0.287252	0.722754	0.192686	sp.Q9NU23.LYRM2_HUMAN	0.454875	0.311157	0.253505	-0.329399	0.197347	0.640557	Buffering	Scaling	Scaling	Scaling
LYZ	0.740378	0.995486	0.576993	2.18757	0.793778	-1.19208	sp.P61626.LYSC_HUMAN	0.832684	-0.396182	0.610973	1.03979	0.580429	-1.43597	Scaling	Anti-Scaling	Anti-Scaling	Anti-Scaling
LZTS1	0.451243	0.465219	0.9708	0.0238072	0.594505	0.441412	sp.Q9Y250.LZTS1_HUMAN	0.0534737	1.42651	0.171838	0.818074	0.459136	0.608437	Scaling	Buffering	Scaling	Anti-Scaling
LZTS3	0.260884	0.488019	0.393693	-0.295864	0.138172	0.783882	sp.O60299.LZTS3_HUMAN	0.762355	0.10294	0.481634	0.187164	0.824653	-0.0842234	Scaling	Scaling	Buffering	Anti-Scaling
M6PR	0.00231071	0.423725	0.130809	-1.18849	0.0729201	1.61222	sp.P20645.MPRD_HUMAN	0.0070234	0.448718	0.193919	-0.444333	0.0388138	0.893051	Scaling	Scaling	Scaling	Scaling
MAB21L1	0.823664	0.106037	0.913318	-0.0219161	0.794641	0.127953	sp.Q13394.MB211_HUMAN	0.971407	0.0384992	0.364999	-0.26077	0.782047	0.299269	Buffering	Buffering	Buffering	Scaling
MACROD1	0.354656	0.588847	0.683508	-0.131476	0.293404	0.720323	sp.Q9BQ69.MACD1_HUMAN	0.658828	0.273768	0.739591	-0.133202	0.565097	0.40697	Scaling	Buffering	Scaling	Buffering
MAD1L1	0.0565193	0.438492	0.728606	0.238763	0.775137	0.199728	sp.Q9Y6D9.MD1L1_HUMAN	0.461737	0.0632775	0.117854	-0.291755	0.0718243	0.355033	Scaling	Anti-Scaling	Buffering	Scaling
MAGOHB	0.366981	0.24565	0.492906	0.316474	0.883791	-0.0708237	sp.Q96A72.MGN2_HUMAN	0.145706	0.144032	0.553022	-0.123229	0.253872	0.267261	Buffering	Anti-Scaling	Buffering	Buffering
MAK16	0.128751	0.358439	0.0194767	-0.802564	0.00423287	1.161	sp.Q9BXY0.MAK16_HUMAN	0.756979	0.0880395	0.0479793	-0.369725	0.159639	0.457764	Scaling	Scaling	Buffering	Scaling
MALSU1	0.00634874	0.30804	0.0241846	-1.10375	0.0103774	1.41179	sp.Q96EH3.MASU1_HUMAN	0.0912924	0.291432	0.342788	-0.241004	0.0671333	0.532436	Scaling	Scaling	Scaling	Buffering
MAML2	0.92607	0.0522488	0.297387	0.452072	0.548662	-0.399823	sp.Q8IZL2.MAML2_HUMAN	0.830362	-0.202308	0.750295	0.113921	0.741131	-0.316229	Buffering	Anti-Scaling	Anti-Scaling	Anti-Scaling
MAN1A1	0.697363	1.00053	0.74927	0.264104	0.778742	0.736429	sp.P33908.MA1A1_HUMAN	0.288885	1.19622	0.358152	-0.782609	0.138265	1.97882	Scaling	Anti-Scaling	Scaling	Scaling
MAN1B1	0.0270939	0.669935	0.245165	0.327781	0.318404	0.342154	sp.Q9UKM7.MA1B1_HUMAN	0.0639038	0.398053	0.326252	0.261842	0.639749	0.136211	Scaling	Anti-Scaling	Scaling	Anti-Scaling
MAN2B1	0.176354	1.34423	0.708682	-0.365393	0.190523	1.70962	sp.O00754.MA2B1_HUMAN	0.163452	1.53657	0.649125	0.259942	0.223924	1.27662	Scaling	Scaling	Scaling	Anti-Scaling
MAP1LC3B2	0.986178	0.00538898	0.914331	-0.0624946	0.914416	0.0678836	sp.A6NCE7.MP3B2_HUMAN	0.155056	0.347075	0.575902	-0.702493	0.426265	1.04957	Buffering	Buffering	Scaling	Scaling
MAP1S	0.609335	0.136667	0.797023	-0.238134	0.694523	0.374801	tr.B4DH53.B4DH53_HUMAN	0.0161259	0.908842	0.739703	-0.177875	0.132398	1.08672	Buffering	Buffering	Scaling	Buffering
MAP2K2	0.351022	0.419157	0.162423	-0.676402	0.0808222	1.09556	sp.P36507.MP2K2_HUMAN	0.223117	0.694121	0.613214	-0.181882	0.161809	0.876003	Scaling	Scaling	Scaling	Buffering
MAP2K3	0.662177	-0.160034	0.000127984	-1.68771	0.0115838	1.52768	sp.P46734.3.MP2K3_HUMAN	0.790489	0.0478552	0.259171	-0.301826	0.244001	0.349682	Anti-Scaling	Scaling	Buffering	Scaling
MAP2K4	0.419352	0.452987	0.00255262	-1.33198	0.0283035	1.78496	sp.P45985.2.MP2K4_HUMAN	0.0108287	0.516649	0.183581	-0.445057	0.0123545	0.961707	Scaling	Scaling	Scaling	Scaling
MAP2K7	0.171403	0.661026	0.815878	-0.117144	0.232552	0.77817	sp.O14733.3.MP2K7_HUMAN	0.122207	1.09734	0.389734	-0.331802	0.0605719	1.42915	Scaling	Buffering	Scaling	Scaling
MAP3K7	0.623469	-0.166592	0.141622	-0.398717	0.558086	0.232125	sp.O43318.M3K7_HUMAN	0.763832	0.0888581	0.677303	-0.0485615	0.654403	0.13742	Anti-Scaling	Scaling	Buffering	Buffering
MAP4K2	0.984217	0.00884425	0.700253	-0.130336	0.795654	0.13918	sp.Q12851.M4K2_HUMAN	0.294364	0.523413	0.793678	0.0577944	0.364426	0.465619	Buffering	Buffering	Scaling	Buffering
MAP4K3	0.0393877	1.36474	0.35426	-0.611949	0.031453	1.97669	sp.Q8IVH8.M4K3_HUMAN	0.122676	0.853419	0.386405	0.0753556	0.148197	0.778064	Scaling	Scaling	Scaling	Buffering
MAP4K5	0.0542138	0.50394	0.255502	-0.20695	0.018647	0.710891	sp.Q9Y4K4.M4K5_HUMAN	0.732318	0.10906	0.736895	-0.0668292	0.621752	0.175889	Scaling	Buffering	Buffering	Buffering
MAP7	0.774275	-0.631912	0.257146	-1.00283	0.870797	0.370922	sp.Q14244.MAP7_HUMAN	0.954421	-0.0711116	0.0714789	-1.04792	0.476371	0.976808	Anti-Scaling	Scaling	Buffering	Scaling
MAPK3	0.000112976	0.360181	0.122507	-0.690813	0.0312013	1.05099	sp.P27361.MK03_HUMAN	0.832183	-0.0933989	0.428677	-0.154171	0.895058	0.0607717	Scaling	Scaling	Buffering	Buffering
MAPK7	0.12959	0.520067	0.0142927	-0.65138	0.00786069	1.17145	sp.Q13164.MK07_HUMAN	0.875924	-0.034657	0.739984	-0.0901461	0.857629	0.0554891	Scaling	Scaling	Buffering	Buffering
MAPK8IP3	0.281748	-0.440879	0.0065874	-1.16051	0.145324	0.719629	sp.Q9UPT6.JIP3_HUMAN	0.899141	0.052112	0.133772	0.135074	0.8391	-0.0829618	Anti-Scaling	Scaling	Buffering	Anti-Scaling
MAPKAP1	0.208865	0.334246	0.628185	-0.126248	0.195308	0.460494	sp.Q9BPZ7.SIN1_HUMAN	0.0412909	0.560625	0.266855	0.269224	0.343941	0.291401	Scaling	Buffering	Scaling	Anti-Scaling
MAPRE3	0.824315	0.190151	0.708851	0.300383	0.920461	-0.110231	sp.Q9UPY8.MARE3_HUMAN	0.806483	-0.0691765	0.5021	0.260431	0.464127	-0.329608	Buffering	Anti-Scaling	Buffering	Anti-Scaling
MARCKS	0.516405	-0.992821	0.949659	-0.0455513	0.552148	-0.94727	sp.P29966.MARCS_HUMAN	0.326558	-1.32054	0.962392	0.0331052	0.3322	-1.35365	Anti-Scaling	Buffering	Anti-Scaling	Buffering
MARK2	0.990218	0.00189437	0.649472	0.0774872	0.71531	-0.0755929	sp.Q7KZI7.MARK2_HUMAN	0.511205	0.118399	0.966288	0.00797014	0.651943	0.110429	Buffering	Buffering	Buffering	Buffering
MARK3	0.00197669	0.756845	0.0148902	-0.673287	0.000162206	1.43013	sp.P27448.MARK3_HUMAN	0.298385	0.247758	0.0726175	-0.422077	0.0396307	0.669835	Scaling	Scaling	Buffering	Scaling
MARS	0.569757	0.182381	0.957694	0.0322362	0.819149	0.150145	sp.P56192.SYMC_HUMAN	0.561302	-0.185067	0.743982	0.174177	0.549377	-0.359244	Buffering	Buffering	Anti-Scaling	Anti-Scaling
MASTL	0.21701	0.472155	5.52104e-05	-0.790229	0.012476	1.26238	sp.Q96GX5.GWL_HUMAN	0.696408	0.212337	0.00173695	-0.374776	0.308989	0.587113	Scaling	Scaling	Buffering	Scaling
MAT2A	0.954776	0.021551	0.213242	-0.272925	0.484134	0.294476	sp.P31153.METK2_HUMAN	0.464664	-0.185189	0.464323	-0.190995	0.985698	0.00580596	Buffering	Scaling	Anti-Scaling	Buffering
MAU2	0.130268	0.747551	0.814776	-0.182328	0.308688	0.929879	sp.Q9Y6X3.SCC4_HUMAN	0.83159	0.0701567	0.30272	0.175458	0.762039	-0.105301	Scaling	Buffering	Buffering	Anti-Scaling
MAVS	0.201469	0.275023	0.00101081	-0.655025	0.00128883	0.930048	sp.Q7Z434.MAVS_HUMAN	0.540087	0.230411	0.0369451	-0.323594	0.168344	0.554005	Scaling	Scaling	Buffering	Scaling
MAX	0.235734	0.518156	0.368181	-0.342748	0.123676	0.860904	sp.P61244.MAX_HUMAN	0.493139	0.437187	0.0208652	-0.656044	0.134964	1.09323	Scaling	Scaling	Scaling	Scaling
MBD3	0.0720874	0.500816	0.0192243	-0.670305	0.00576786	1.17112	sp.O95983.MBD3_HUMAN	0.943004	-0.0631842	0.643973	-0.352646	0.790459	0.289462	Scaling	Scaling	Buffering	Scaling
MBIP	0.131244	1.19376	0.0368624	-0.549554	0.0479202	1.74331	sp.Q9NS73.MBIP1_HUMAN	0.641452	0.183362	0.0142731	-0.598594	0.100275	0.781956	Scaling	Scaling	Buffering	Scaling
MBNL2	0.149585	-0.844964	0.843157	0.0953619	0.183832	-0.940326	sp.Q5VZF2.MBNL2_HUMAN	0.231737	-1.37771	0.369482	-0.318967	0.355572	-1.05874	Anti-Scaling	Buffering	Anti-Scaling	Scaling
MBOAT2	0.995842	0.00680854	0.821478	0.276733	0.874457	-0.269925	sp.Q6ZWT7.MBOA2_HUMAN	0.396271	0.548432	0.223119	0.981896	0.626615	-0.433464	Buffering	Anti-Scaling	Scaling	Anti-Scaling
MBOAT7	0.231093	0.511679	0.432434	-0.827328	0.250046	1.33901	sp.Q96N66.MBOA7_HUMAN	0.00964615	0.783293	0.488389	-0.739922	0.220231	1.52321	Scaling	Scaling	Scaling	Scaling
MBTPS1	0.17011	-0.263058	0.0272286	-0.541149	0.292378	0.27809	sp.Q14703.MBTP1_HUMAN	0.339023	0.142197	0.585678	-0.137683	0.316021	0.27988	Anti-Scaling	Scaling	Buffering	Buffering
MCAM	0.518168	0.660603	0.73187	0.360168	0.826116	0.300435	sp.P43121.MUC18_HUMAN	0.259835	0.835884	0.156895	-0.75103	0.0704567	1.58691	Scaling	Anti-Scaling	Scaling	Scaling
MCEE	0.373047	0.46755	0.000704921	0.366423	0.836133	0.101127	sp.Q96PE7.MCEE_HUMAN	0.58683	0.528581	0.894676	0.0481159	0.632884	0.480465	Scaling	Anti-Scaling	Scaling	Buffering
MCF2L	0.17804	-1.02373	0.0319146	-1.12055	0.903472	0.0968223	sp.O15068.8.MCF2L_HUMAN	0.711079	-0.326492	0.581267	-0.273097	0.953408	-0.0533945	Anti-Scaling	Scaling	Anti-Scaling	Scaling
MCFD2	0.0314222	0.712795	0.860825	0.0575234	0.123206	0.655271	sp.Q8NI22.MCFD2_HUMAN	0.13332	0.816952	0.748119	0.288496	0.582385	0.528456	Scaling	Buffering	Scaling	Anti-Scaling
MCM10	0.171127	0.485218	0.000181696	-1.0623	0.00200764	1.54752	sp.Q7L590.MCM10_HUMAN	0.0806047	1.05342	0.667638	0.0713938	0.0963962	0.982028	Scaling	Scaling	Scaling	Buffering
MCM8	0.667864	0.113142	0.0026205	-0.524347	0.0389361	0.637489	sp.Q9UJA3.4.MCM8_HUMAN	0.551079	0.127077	0.597936	-0.125248	0.381392	0.252325	Buffering	Scaling	Buffering	Buffering
MCRS1	0.00561442	0.609829	0.363405	-0.292038	0.0519338	0.901867	sp.Q96EZ8.2.MCRS1_HUMAN	0.972444	0.00305122	0.335648	0.602864	0.337366	-0.599813	Scaling	Scaling	Buffering	Anti-Scaling
MDH1	0.662756	0.0927218	0.223808	-0.455181	0.179719	0.547903	sp.P40925.3.MDHC_HUMAN	0.393504	-0.272142	0.675689	-0.152792	0.787801	-0.11935	Buffering	Scaling	Anti-Scaling	Buffering
MDN1	0.964275	-0.0207329	0.274727	-0.290229	0.602362	0.269496	sp.Q9NU22.MDN1_HUMAN	0.621865	0.312169	0.109475	-0.284646	0.384541	0.596815	Buffering	Scaling	Scaling	Scaling
MDP1	0.21782	0.292267	0.140197	-0.383591	0.0445177	0.675858	sp.Q86V88.MGDP1_HUMAN	0.63565	0.291783	0.0138445	-0.88815	0.108754	1.17993	Scaling	Scaling	Scaling	Scaling
ME1	0.577194	-0.95921	0.330142	-0.7145	0.887817	-0.24471	sp.P48163.MAOX_HUMAN	0.288014	-0.906939	0.53115	-0.327338	0.502232	-0.579601	Anti-Scaling	Scaling	Anti-Scaling	Scaling
ME3	0.445534	-0.696074	0.226337	-0.704775	0.993051	0.00870151	sp.Q16798.MAON_HUMAN	0.625187	-0.352341	0.292532	-0.441127	0.910534	0.0887864	Anti-Scaling	Scaling	Anti-Scaling	Scaling
MED13L	0.81264	-0.104568	0.445059	0.279518	0.472142	-0.384085	sp.Q71F56.MD13L_HUMAN	0.350495	0.518708	0.13645	0.165656	0.508292	0.353052	Anti-Scaling	Anti-Scaling	Scaling	Anti-Scaling
MED16	0.0460876	0.541653	0.375663	-0.74877	0.186298	1.29042	sp.Q9Y2X0.3.MED16_HUMAN	0.83599	-0.136174	0.168582	-0.374451	0.726501	0.238277	Scaling	Scaling	Anti-Scaling	Scaling
MED17	0.180695	0.175677	0.00846658	-0.647962	0.00243162	0.823639	sp.Q9NVC6.MED17_HUMAN	0.916838	-0.021619	0.106878	-0.234809	0.376071	0.21319	Buffering	Scaling	Buffering	Buffering
MED19	0.146866	0.222318	0.0892884	0.376343	0.508203	-0.154025	sp.A0JLT2.MED19_HUMAN	0.774923	0.066929	0.501858	-0.155359	0.467349	0.222288	Buffering	Anti-Scaling	Buffering	Buffering
MED21	0.344711	0.202681	0.362314	-0.336742	0.194166	0.539423	sp.Q13503.MED21_HUMAN	0.883898	-0.0486766	0.304185	0.585498	0.292566	-0.634174	Buffering	Scaling	Buffering	Anti-Scaling
MED22	0.755444	0.0688338	0.468003	-0.245225	0.416649	0.314059	sp.Q15528.MED22_HUMAN	0.461884	0.164197	0.822334	-0.0514919	0.47472	0.215689	Buffering	Buffering	Buffering	Buffering
MED23	0.4931	0.380849	0.0351491	-0.690908	0.123469	1.07176	tr.Q5JWT2.Q5JWT2_HUMAN	0.0403314	0.994246	0.00225707	-0.247392	0.0251679	1.24164	Scaling	Scaling	Scaling	Buffering
MED25	0.655557	0.153515	0.702119	-0.143528	0.539195	0.297043	sp.Q71SY5.4.MED25_HUMAN	0.784953	-0.069613	0.283775	-0.268174	0.533483	0.198561	Buffering	Buffering	Buffering	Scaling
MED26	0.119794	0.495696	0.409957	-0.461948	0.153076	0.957645	sp.O95402.MED26_HUMAN	0.582557	0.352282	0.701395	-0.155643	0.481154	0.507924	Scaling	Scaling	Scaling	Buffering
MED27	0.0877793	0.470449	0.762882	-0.074127	0.119175	0.544576	sp.Q6P2C8.MED27_HUMAN	0.0436934	0.140598	0.49835	-0.13364	0.197667	0.274238	Scaling	Buffering	Buffering	Buffering
MED29	0.190687	0.439802	0.104399	-0.398222	0.0376045	0.838024	sp.Q9NX70.MED29_HUMAN	0.646582	-0.21902	0.395457	-0.357279	0.811092	0.138259	Scaling	Scaling	Anti-Scaling	Scaling
MED4	0.248525	0.217534	0.00391782	-0.642431	0.00260917	0.859965	sp.Q9NPJ6.MED4_HUMAN	0.698495	-0.0583782	0.87474	-0.013917	0.778624	-0.0444613	Buffering	Scaling	Buffering	Buffering
MED6	0.0184452	0.657989	0.207146	-0.288679	0.00551685	0.946669	sp.O75586.MED6_HUMAN	0.0677321	0.333945	0.0107892	-0.455022	0.00204119	0.788967	Scaling	Scaling	Scaling	Scaling
MEGF9	0.348847	-0.200257	0.8899	-0.0630509	0.7708	-0.137206	sp.Q9H1U4.MEGF9_HUMAN	0.165392	0.751184	0.931566	-0.0661759	0.361038	0.81736	Anti-Scaling	Buffering	Scaling	Buffering
MEIS1	0.573076	0.941602	0.684311	-0.126401	0.527074	1.068	sp.O00470.2.MEIS1_HUMAN	0.921063	0.0861485	0.332877	-0.295323	0.671178	0.381471	Scaling	Buffering	Buffering	Scaling
MELK	0.396365	-0.496578	0.0452713	-0.461298	0.95101	-0.0352797	sp.Q14680.6.MELK_HUMAN	0.9897	-0.00337495	0.224477	0.21867	0.440853	-0.222045	Anti-Scaling	Scaling	Buffering	Anti-Scaling
MEMO1	0.134151	0.517137	0.0976104	-0.51167	0.0225631	1.02881	sp.Q9Y316.MEMO1_HUMAN	0.9371	-0.0433297	0.858768	-0.024985	0.973574	-0.0183447	Scaling	Scaling	Buffering	Buffering
MEN1	0.342056	0.129315	0.965829	-0.00979451	0.577344	0.13911	sp.O00255.MEN1_HUMAN	0.0645856	0.418021	0.0307886	-0.355416	0.00555884	0.773437	Buffering	Buffering	Scaling	Scaling
METAP2	0.444379	0.127969	0.308057	-0.340251	0.196769	0.468221	tr.F8VQZ7.F8VQZ7_HUMAN	0.715478	0.117678	0.0596353	-0.568331	0.0971664	0.686008	Buffering	Scaling	Buffering	Scaling
METAP2	0.444379	0.127969	0.308057	-0.340251	0.196769	0.468221	tr.F8VSC4.F8VSC4_HUMAN	0.694114	0.235021	0.0535265	-0.837711	0.157651	1.07273	Buffering	Scaling	Buffering	Scaling
METTL1	2.07526e-06	0.869756	0.388853	0.846315	0.978671	0.0234407	sp.Q9UBP6.TRMB_HUMAN	0.818302	-0.101273	0.145774	0.272931	0.428657	-0.374204	Scaling	Anti-Scaling	Anti-Scaling	Anti-Scaling
METTL16	0.978505	0.00886128	0.00104236	-0.500068	0.211507	0.50893	sp.Q86W50.MET16_HUMAN	0.66472	-0.0692621	0.0335117	-0.383477	0.154844	0.314215	Buffering	Scaling	Buffering	Scaling
METTL17	0.326229	0.237717	0.00572202	-0.752969	0.00624688	0.990686	sp.Q9H7H0.MET17_HUMAN	0.968112	0.00548639	0.0703873	-0.26815	0.129331	0.273636	Buffering	Scaling	Buffering	Scaling
METTL3	0.176752	0.516869	0.00375658	-0.779711	0.0100399	1.29658	sp.Q86U44.MTA70_HUMAN	0.0368225	0.481134	0.00617193	-0.676645	0.000585068	1.15778	Scaling	Scaling	Scaling	Scaling
METTL7A	0.053136	2.8646	0.6032	-0.380551	0.0365463	3.24515	sp.Q9H8H3.MET7A_HUMAN	0.042212	2.7831	0.773472	-0.234345	0.0399556	3.01744	Scaling	Scaling	Scaling	Buffering
METTL7B	1.68183e-05	2.40302	0.519551	1.13314	0.476658	1.26988	sp.Q6UX53.MET7B_HUMAN	0.0874164	0.953938	0.764349	0.394857	0.681809	0.559081	Scaling	Anti-Scaling	Scaling	Anti-Scaling
MEX3D	0.12346	-1.07536	0.509694	-0.669014	0.696069	-0.40635	sp.Q86XN8.MEX3D_HUMAN	0.398117	-0.728192	0.612109	-0.501401	0.844729	-0.226791	Anti-Scaling	Scaling	Anti-Scaling	Scaling
MFHAS1	0.161256	0.460639	0.024401	-0.754853	0.00448797	1.21549	sp.Q9Y4C4.MFHA1_HUMAN	0.51656	0.382299	0.0375602	-0.638289	0.118691	1.02059	Scaling	Scaling	Scaling	Scaling
MGAT2	0.133299	0.438428	0.80077	-0.0724662	0.180897	0.510894	sp.Q10469.MGAT2_HUMAN	0.624707	0.136661	0.178681	0.389189	0.495803	-0.252527	Scaling	Buffering	Buffering	Anti-Scaling
MGME1	0.00760262	0.31873	0.0662133	-0.42667	0.00511096	0.745401	sp.Q9BQP7.MGME1_HUMAN	0.0605858	0.45688	0.24699	-0.278869	0.0239095	0.735749	Scaling	Scaling	Scaling	Scaling
MGRN1	0.928516	0.0423222	0.0609334	-0.752859	0.197492	0.795181	sp.O60291.2.MGRN1_HUMAN	0.265181	0.176408	0.598858	-0.180882	0.322111	0.35729	Buffering	Scaling	Buffering	Buffering
MGST1	0.743799	0.374794	0.00357268	2.15319	0.138984	-1.77839	sp.P10620.MGST1_HUMAN	0.452343	0.369458	0.18095	0.858083	0.462415	-0.488625	Scaling	Anti-Scaling	Scaling	Anti-Scaling
MICAL1	0.745669	0.443887	0.130358	-0.777676	0.416573	1.22156	sp.Q8TDZ2.4.MICA1_HUMAN	0.574204	0.679942	0.403622	-0.16722	0.493992	0.847162	Scaling	Scaling	Scaling	Buffering
MICALL2	0.0176704	1.07851	0.383337	-1.09565	0.131753	2.17416	sp.Q8IY33.MILK2_HUMAN	0.00798611	0.654798	0.40407	-0.627289	0.137559	1.28209	Scaling	Scaling	Scaling	Scaling
MICU2	0.00164361	0.572919	0.0109943	-0.471347	4.65177e-05	1.04427	sp.Q8IYU8.MICU2_HUMAN	0.887393	0.0771835	0.855967	0.0378798	0.944662	0.0393037	Scaling	Scaling	Buffering	Buffering
MINK1	0.228435	0.592103	0.00158491	-0.902325	0.0262278	1.49443	sp.Q8N4C8.MINK1_HUMAN	0.21089	0.511485	0.0114936	-0.378184	0.071582	0.889669	Scaling	Scaling	Scaling	Scaling
MIOS	0.00252999	0.377763	0.0417083	-0.603836	0.00749002	0.981599	sp.Q9NXC5.MIO_HUMAN	0.413423	0.0732053	0.0573648	-0.416317	0.0324343	0.489522	Scaling	Scaling	Buffering	Scaling
MIPEP	0.695741	0.188481	0.0662152	-0.646395	0.154891	0.834877	sp.Q99797.MIPEP_HUMAN	0.249291	0.361668	0.131127	-0.3855	0.0560789	0.747167	Buffering	Scaling	Scaling	Scaling
MIPOL1	0.771913	-0.226998	0.271018	-0.490331	0.758048	0.263333	sp.Q8TD10.MIPO1_HUMAN	0.854945	0.116669	0.895872	-0.0306563	0.823436	0.147325	Anti-Scaling	Scaling	Buffering	Buffering
MIS12	0.781413	0.117839	0.00124301	-0.480874	0.242416	0.598713	sp.Q9H081.MIS12_HUMAN	0.144121	0.451154	0.724441	0.0454738	0.16424	0.40568	Buffering	Scaling	Scaling	Buffering
MIS18BP1	0.0193519	0.767273	0.00644965	-1.00497	0.000336257	1.77224	sp.Q6P0N0.M18BP_HUMAN	0.129625	0.641126	0.0202207	-0.655276	0.0135372	1.2964	Scaling	Scaling	Scaling	Scaling
MISP	8.6985e-10	-2.1138	0.60614	0.979743	0.193922	-3.09354	sp.Q8IVT2.MISP_HUMAN	0.675736	-0.580808	0.69639	0.389866	0.546148	-0.970674	Anti-Scaling	Anti-Scaling	Anti-Scaling	Anti-Scaling
MLEC	0.0640659	1.05122	0.228221	-0.291049	0.0296685	1.34227	sp.Q14165.MLEC_HUMAN	0.0020253	0.971719	0.866	-0.0373657	0.0119556	1.00908	Scaling	Scaling	Scaling	Buffering
MLF2	0.0295662	0.38475	0.0756903	-0.945003	0.0253894	1.32975	sp.Q15773.MLF2_HUMAN	0.268284	0.216689	0.155122	-0.599713	0.0706068	0.816402	Scaling	Scaling	Buffering	Scaling
MLKL	0.0132907	1.14468	0.532588	0.230069	0.0662376	0.914607	sp.Q8NB16.MLKL_HUMAN	0.0162583	0.800517	0.391558	0.326181	0.26806	0.474336	Scaling	Anti-Scaling	Scaling	Anti-Scaling
MLLT1	0.272313	0.233887	0.640974	-0.338365	0.456395	0.572253	sp.Q03111.ENL_HUMAN	0.371615	0.237273	0.531342	-0.302332	0.318942	0.539605	Buffering	Scaling	Buffering	Scaling
MLLT10	0.0453301	0.702538	1.60088e-06	-0.870369	0.00126593	1.57291	sp.P55197.AF10_HUMAN	0.804236	-0.065849	0.00190392	-0.862403	0.0295814	0.796554	Scaling	Scaling	Buffering	Scaling
MLLT3	0.218197	0.874202	0.480746	-0.249601	0.137099	1.1238	sp.P42568.AF9_HUMAN	0.180191	0.735422	0.58041	0.197167	0.320862	0.538255	Scaling	Buffering	Scaling	Anti-Scaling
MLST8	0.988842	-0.00512257	0.0289854	-0.647389	0.17662	0.642266	sp.Q9BVC4.LST8_HUMAN	0.47823	0.114104	0.384934	0.134515	0.91644	-0.0204103	Buffering	Scaling	Buffering	Anti-Scaling
MLYCD	0.445717	-0.150655	0.0098141	-0.471414	0.181839	0.320759	sp.O95822.DCMC_HUMAN	0.0803098	0.362739	0.0958041	-0.638618	0.0203752	1.00136	Anti-Scaling	Scaling	Scaling	Scaling
MMAB	0.0159092	1.45475	0.55952	-0.314038	0.0344483	1.76879	sp.Q96EY8.MMAB_HUMAN	0.0283279	1.96829	0.0653785	-1.32371	0.00359934	3.292	Scaling	Scaling	Scaling	Scaling
MMP1	0.214275	-0.819054	0.414238	-0.499598	0.663673	-0.319455	sp.P03956.MMP1_HUMAN	0.563378	-0.233822	0.00558075	-0.843378	0.112918	0.609556	Anti-Scaling	Scaling	Anti-Scaling	Scaling
MMP14	0.887452	0.161036	0.00933625	2.19999	0.134966	-2.03895	sp.P50281.MMP14_HUMAN	0.675485	-0.199183	0.0232665	1.21795	0.0374427	-1.41713	Buffering	Anti-Scaling	Anti-Scaling	Anti-Scaling
MMP15	0.475185	0.381852	0.416443	-0.50235	0.245532	0.884202	sp.P51511.MMP15_HUMAN	0.240246	-0.443573	0.0300726	-0.794915	0.419698	0.351342	Scaling	Scaling	Anti-Scaling	Scaling
MMP2	0.972077	0.0466442	0.612334	-0.34538	0.783104	0.392024	sp.P08253.MMP2_HUMAN	0.852358	0.145573	0.215851	-0.478317	0.45455	0.623891	Buffering	Scaling	Buffering	Scaling
MMS22L	0.930734	-0.0675202	0.245352	-0.342882	0.735945	0.275362	sp.Q6ZRQ5.MMS22_HUMAN	0.352946	0.734412	0.236998	-0.299154	0.226269	1.03357	Buffering	Scaling	Scaling	Scaling
MNAT1	0.0422697	0.967707	0.711469	-0.0908111	0.0320301	1.05852	sp.P51948.MAT1_HUMAN	0.458473	0.255151	0.0535308	-0.266027	0.171679	0.521178	Scaling	Buffering	Scaling	Scaling
MNT	0.889645	0.0263104	0.00445604	-0.380387	0.103932	0.406697	sp.Q99583.MNT_HUMAN	0.1837	-0.293794	0.32481	-0.266443	0.927183	-0.0273515	Buffering	Scaling	Anti-Scaling	Scaling
MOGS	0.00735065	0.509939	0.89438	-0.0352251	0.103083	0.545164	sp.Q13724.MOGS_HUMAN	0.0893415	0.683917	0.647158	-0.16816	0.0966597	0.852077	Scaling	Buffering	Scaling	Buffering
MON1B	0.902949	0.0656629	0.0382854	-0.702712	0.22198	0.768375	sp.Q7L1V2.MON1B_HUMAN	0.181916	0.361245	0.718733	-0.0644635	0.16439	0.425708	Buffering	Scaling	Scaling	Buffering
MON2	0.306533	0.496281	0.201385	0.481098	0.976027	0.015183	tr.B9EGP5.B9EGP5_HUMAN	0.552789	0.166603	0.49932	0.415271	0.689267	-0.248668	Scaling	Anti-Scaling	Buffering	Anti-Scaling
MPC1	0.0140807	1.78012	0.207234	-0.393755	0.000945037	2.17388	sp.Q9Y5U8.MPC1_HUMAN	0.208666	0.885038	0.301408	-0.594561	0.0849781	1.4796	Scaling	Scaling	Scaling	Scaling
MPDU1	0.591671	0.177166	4.67061e-06	-0.81012	0.0547985	0.987286	tr.J3QW43.J3QW43_HUMAN	0.411599	0.29184	0.0938206	-0.48858	0.0865322	0.78042	Buffering	Scaling	Scaling	Scaling
MPDZ	0.80455	-0.28158	0.165709	0.611985	0.460456	-0.893564	sp.O75970.MPDZ_HUMAN	0.625108	-0.353967	0.0174677	0.641963	0.21776	-0.99593	Anti-Scaling	Anti-Scaling	Anti-Scaling	Anti-Scaling
MPG	0.654232	0.118225	0.0127069	-0.943619	0.019347	1.06184	sp.P29372.3MG_HUMAN	0.791076	0.100714	0.0516818	-0.491651	0.20901	0.592365	Buffering	Scaling	Buffering	Scaling
MPHOSPH10	0.142161	0.531974	0.0874193	-0.498628	0.0247409	1.0306	sp.O00566.MPP10_HUMAN	0.429743	0.157883	0.128313	-0.337144	0.0794994	0.495027	Scaling	Scaling	Buffering	Scaling
MPHOSPH6	0.228967	0.595414	0.237518	-0.252795	0.11592	0.848209	sp.Q99547.MPH6_HUMAN	0.145616	0.332432	0.141288	-0.227216	0.036126	0.559648	Scaling	Scaling	Scaling	Buffering
MPHOSPH8	0.017111	0.413616	0.00476384	-0.508828	0.000184017	0.922444	sp.Q99549.MPP8_HUMAN	0.101126	0.292123	0.0191419	-0.242086	0.0101093	0.534209	Scaling	Scaling	Scaling	Buffering
MPHOSPH9	0.0570188	0.509547	0.908315	-0.0763458	0.424613	0.585893	tr.U3KQ28.U3KQ28_HUMAN	0.296975	0.278238	0.377346	-0.292789	0.155891	0.571027	Scaling	Buffering	Scaling	Scaling
MPLKIP	7.02063e-05	0.512084	0.125077	-0.735787	0.0327581	1.24787	sp.Q8TAP9.MPLKI_HUMAN	0.920344	-0.0204597	0.822229	-0.0557999	0.894539	0.0353401	Scaling	Scaling	Buffering	Buffering
MPP5	0.530389	0.235182	0.387931	0.301047	0.889053	-0.0658645	sp.Q8N3R9.MPP5_HUMAN	0.696376	0.24286	0.132227	0.521123	0.676882	-0.278263	Buffering	Anti-Scaling	Buffering	Anti-Scaling
MPP6	0.0254422	0.463423	0.540848	-0.296591	0.169126	0.760014	sp.Q9NZW5.MPP6_HUMAN	0.00318538	0.48854	0.67431	-0.153318	0.135528	0.641857	Scaling	Scaling	Scaling	Buffering
MPP7	0.712533	-0.324722	0.000179934	-1.00725	0.451903	0.682529	sp.Q5T2T1.MPP7_HUMAN	0.277419	-0.868566	0.000206048	-1.09452	0.764332	0.225959	Anti-Scaling	Scaling	Anti-Scaling	Scaling
MPRIP	0.501962	0.552375	0.000168904	-1.53347	0.0749805	2.08584	sp.Q6WCQ1.MPRIP_HUMAN	0.341567	0.564653	0.0020398	-1.26234	0.0296575	1.82699	Scaling	Scaling	Scaling	Scaling
MPRIP	0.501962	0.552375	0.000168904	-1.53347	0.0749805	2.08584	tr.H0Y2S9.H0Y2S9_HUMAN	0.505053	0.60491	0.0595508	-0.669253	0.223209	1.27416	Scaling	Scaling	Scaling	Scaling
MPV17	0.672823	0.197545	0.00383547	0.423194	0.632586	-0.225649	sp.P39210.MPV17_HUMAN	0.737771	0.147019	0.359822	0.36173	0.690687	-0.214711	Buffering	Anti-Scaling	Buffering	Anti-Scaling
MPZL2	0.232686	1.66605	0.921629	-0.10485	0.285782	1.7709	sp.O60487.MPZL2_HUMAN	0.235887	1.48577	0.658357	0.360881	0.41478	1.12489	Scaling	Buffering	Scaling	Anti-Scaling
MRI1	0.0294433	0.940702	0.103683	-0.607232	0.00858113	1.54793	sp.Q9BV20.MTNA_HUMAN	0.0968752	1.07576	0.0932106	-1.02164	0.0157987	2.0974	Scaling	Scaling	Scaling	Scaling
MRPL11	0.178651	0.364096	0.875207	-0.0239607	0.184988	0.388056	sp.Q9Y3B7.RM11_HUMAN	0.330422	0.268231	0.859067	-0.0410167	0.362072	0.309248	Scaling	Buffering	Scaling	Buffering
MRPL16	0.342777	0.215328	0.0410417	-0.373908	0.0400128	0.589236	sp.Q9NX20.RM16_HUMAN	0.924796	-0.0254404	0.290532	-0.23776	0.525806	0.21232	Buffering	Scaling	Buffering	Buffering
MRPL18	0.437837	0.345962	0.0044513	-0.688311	0.0816205	1.03427	sp.Q9H0U6.RM18_HUMAN	0.808003	0.0751819	0.869117	0.0267556	0.883835	0.0484263	Scaling	Scaling	Buffering	Buffering
MRPL19	0.000625366	0.575549	0.325236	-0.315411	0.0390811	0.89096	sp.P49406.RM19_HUMAN	0.71111	0.0839224	0.718417	-0.11495	0.594063	0.198872	Scaling	Scaling	Buffering	Buffering
MRPL21	0.0984091	0.594956	0.0748626	0.387427	0.563176	0.207529	sp.Q7Z2W9.RM21_HUMAN	0.526534	0.159997	0.950399	0.0117223	0.614435	0.148274	Scaling	Anti-Scaling	Buffering	Buffering
MRPL28	0.517902	0.273247	0.0226899	-0.704882	0.0815844	0.978129	sp.Q13084.RM28_HUMAN	0.107201	0.302087	0.143531	-0.289283	0.020792	0.591369	Scaling	Scaling	Scaling	Scaling
MRPL32	2.19273e-05	0.436558	0.0076858	-1.0074	0.00133171	1.44396	sp.Q9BYC8.RM32_HUMAN	0.545885	0.0913169	0.821053	-0.06735	0.614853	0.158667	Scaling	Scaling	Buffering	Buffering
MRPL34	0.0445053	0.517035	0.15791	-0.557236	0.0340608	1.07427	sp.Q9BQ48.RM34_HUMAN	0.392216	-0.39475	0.95021	0.0441426	0.584148	-0.438893	Scaling	Scaling	Anti-Scaling	Buffering
MRPL35	0.619939	0.0560557	0.150528	-0.52406	0.121474	0.580116	sp.Q9NZE8.RM35_HUMAN	0.888606	0.0434583	0.80966	0.0679576	0.950414	-0.0244993	Buffering	Scaling	Buffering	Buffering
MRPL4	0.00979548	0.51032	0.402483	-0.434352	0.143123	0.944672	sp.Q9BYD3.RM04_HUMAN	1.9514e-23	-0.824731	0.000271304	0.413035	0.000921315	-1.23777	Scaling	Scaling	Anti-Scaling	Anti-Scaling
MRPL41	0.441488	0.2186	0.895693	-0.0481846	0.539797	0.266785	sp.Q8IXM3.RM41_HUMAN	0.0506735	0.229796	0.891361	-0.0289762	0.259309	0.258772	Buffering	Buffering	Buffering	Buffering
MRPL42	0.0606564	0.92521	0.129534	-0.571226	0.013584	1.49644	sp.Q9Y6G3.RM42_HUMAN	0.0850983	0.731969	0.901881	-0.0567763	0.190157	0.788746	Scaling	Scaling	Scaling	Buffering
MRPL48	0.395497	0.275805	0.57653	-0.189741	0.305167	0.465546	sp.Q96GC5.RM48_HUMAN	0.878666	0.0508584	0.7659	0.0515159	0.998545	-0.000657577	Scaling	Buffering	Buffering	Buffering
MRPL49	0.256486	0.185649	0.690853	-0.050373	0.210115	0.236022	sp.Q13405.RM49_HUMAN	0.112154	0.199486	0.505525	-0.163126	0.16983	0.362612	Buffering	Buffering	Buffering	Buffering
MRPL50	0.0976981	0.300289	0.036335	-0.794766	0.00924196	1.09506	sp.Q8N5N7.RM50_HUMAN	0.0122257	0.242342	0.929163	-0.0279446	0.402461	0.270286	Scaling	Scaling	Buffering	Buffering
MRPL51	6.39819e-06	0.654322	0.092618	-0.651214	0.0154499	1.30554	sp.Q4U2R6.RM51_HUMAN	0.789358	0.0479606	0.433991	-0.397736	0.394204	0.445696	Scaling	Scaling	Buffering	Scaling
MRPL52	0.350311	0.231462	0.24774	-0.25195	0.128667	0.483412	sp.Q86TS9.RM52_HUMAN	0.855813	-0.0678669	0.0186032	-0.486844	0.309571	0.418977	Buffering	Scaling	Buffering	Scaling
MRPL53	0.994428	-0.00234255	0.45843	-0.0657275	0.850295	0.0633849	sp.Q96EL3.RM53_HUMAN	0.281862	0.310003	0.779408	0.0923323	0.58544	0.217671	Buffering	Buffering	Scaling	Buffering
MRPL54	0.0931111	0.859046	0.154932	-0.382033	0.0299498	1.24108	sp.Q6P161.RM54_HUMAN	0.458531	0.296297	0.961748	-0.0280151	0.627111	0.324312	Scaling	Scaling	Scaling	Buffering
MRPS12	2.67344e-05	0.874967	0.0626087	0.44499	0.0555523	0.429977	sp.O15235.RT12_HUMAN	0.369335	0.17989	0.861112	-0.0483159	0.484593	0.228206	Scaling	Anti-Scaling	Buffering	Buffering
MRPS17	0.00224942	0.361615	0.277083	-0.399681	0.0800721	0.761296	tr.I3L0E3.I3L0E3_HUMAN	0.0783459	0.263423	0.796797	0.0544783	0.341199	0.208944	Scaling	Scaling	Scaling	Buffering
MRPS2	0.697948	0.0471055	0.610706	-0.178929	0.532336	0.226034	sp.Q9Y399.RT02_HUMAN	0.00754692	0.370705	0.119671	0.212888	0.291338	0.157817	Buffering	Buffering	Scaling	Anti-Scaling
MRPS24	0.00112234	0.411705	0.0946943	-1.12167	0.0430961	1.53337	sp.Q96EL2.RT24_HUMAN	0.83511	0.0304814	0.0466826	-1.1404	0.0377031	1.17088	Scaling	Scaling	Buffering	Scaling
MRPS26	0.0371932	0.434802	0.00639228	-0.766918	0.000452864	1.20172	sp.Q9BYN8.RT26_HUMAN	0.0298753	0.255353	0.26712	-0.195652	0.0220205	0.451005	Scaling	Scaling	Scaling	Buffering
MRPS31	0.0452695	0.530379	0.00388215	-0.56263	0.00118303	1.09301	sp.Q92665.RT31_HUMAN	0.752328	0.088726	0.107534	-0.302436	0.233246	0.391162	Scaling	Scaling	Buffering	Scaling
MRPS34	0.724658	0.127728	0.0271232	-0.485091	0.177165	0.612819	sp.P82930.RT34_HUMAN	0.156951	0.38845	0.0570504	-0.190464	0.0706941	0.578914	Buffering	Scaling	Scaling	Buffering
MRPS35	0.00194837	0.659632	0.48797	-0.485221	0.177039	1.14485	sp.P82673.RT35_HUMAN	0.156709	0.267251	0.421945	-0.444243	0.243351	0.711494	Scaling	Scaling	Scaling	Scaling
MRRF	0.357692	0.243397	0.120889	-0.432755	0.0654636	0.676151	sp.Q96E11.RRFM_HUMAN	0.0651087	0.411531	0.0066772	-0.262517	0.0100969	0.674049	Buffering	Scaling	Scaling	Scaling
MS4A1	0.519185	0.988913	0.458246	1.02782	0.984205	-0.0389115	sp.P11836.CD20_HUMAN	0.846262	0.20483	0.645515	0.495577	0.832205	-0.290747	Scaling	Anti-Scaling	Buffering	Anti-Scaling
MSANTD2	0.377627	0.224131	0.952098	-0.0105891	0.413699	0.23472	sp.Q6P1R3.MSD2_HUMAN	0.595865	-0.266772	0.596232	0.226497	0.427085	-0.493269	Buffering	Buffering	Anti-Scaling	Anti-Scaling
MSANTD4	0.00349053	0.682019	0.17977	-0.667047	0.0183105	1.34907	sp.Q8NCY6.MSD4_HUMAN	0.00983606	0.382432	0.250097	-0.59578	0.0901645	0.978212	Scaling	Scaling	Scaling	Scaling
MSH2	0.324446	0.351586	0.157477	-1.04136	0.083233	1.39294	sp.P43246.MSH2_HUMAN	0.0493515	0.562461	0.447357	-0.536426	0.170259	1.09889	Scaling	Scaling	Scaling	Scaling
MSH6	0.451919	0.186932	0.0164723	-0.635629	0.0182647	0.822561	sp.P52701.MSH6_HUMAN	0.0401089	0.731197	0.317701	-0.510717	0.0535227	1.24191	Buffering	Scaling	Scaling	Scaling
MSI1	0.380302	1.01396	2.29653e-06	-0.836883	0.156576	1.85085	sp.O43347.MSI1H_HUMAN	0.290605	1.38156	0.203667	-1.35537	0.0917016	2.73692	Scaling	Scaling	Scaling	Scaling
MSLN	0.0106265	1.12376	0.579393	-0.442711	0.0734475	1.56647	sp.Q13421.2.MSLN_HUMAN	0.183814	1.31524	0.366428	-0.633028	0.0831992	1.94827	Scaling	Scaling	Scaling	Scaling
MSRA	0.0828114	0.655337	0.0324421	-0.718185	0.00467648	1.37352	sp.Q9UJ68.MSRA_HUMAN	0.360351	0.353839	0.077305	-0.431637	0.0729825	0.785476	Scaling	Scaling	Scaling	Scaling
MSRB2	0.861764	-0.078504	0.135975	-0.390363	0.530213	0.311859	sp.Q9Y3D2.MSRB2_HUMAN	0.762728	0.210243	0.00468351	-0.565437	0.298894	0.77568	Buffering	Scaling	Buffering	Scaling
MSRB3	0.930342	-0.101836	0.812118	0.290173	0.804135	-0.392009	sp.Q8IXL7.2.MSRB3_HUMAN	0.766445	0.520981	0.690463	-0.324861	0.650273	0.845842	Anti-Scaling	Anti-Scaling	Scaling	Scaling
MT1G	0.54356	0.598864	0.48699	-0.591572	0.318344	1.19044	sp.P13640.MT1G_HUMAN	0.757005	-0.305913	0.0302544	-0.971691	0.521426	0.665778	Scaling	Scaling	Anti-Scaling	Scaling
MT2A	0.144011	1.06216	0.180112	-1.47253	0.0469084	2.53469	sp.P02795.MT2_HUMAN	0.623212	0.620177	0.561491	-0.581128	0.431534	1.20131	Scaling	Scaling	Scaling	Scaling
MTA1	0.0513308	0.851698	0.00557773	-1.26225	0.00078391	2.11395	sp.Q13330.MTA1_HUMAN	0.674612	0.134314	0.00305454	-0.594176	0.0657276	0.728489	Scaling	Scaling	Buffering	Scaling
MTA2	0.371667	0.15471	0.585996	-0.0980793	0.274698	0.252789	sp.O94776.MTA2_HUMAN	0.51824	-0.182815	0.184888	-0.184939	0.994262	0.00212441	Buffering	Buffering	Anti-Scaling	Buffering
MTA3	0.0283168	0.786378	0.313233	-0.704847	0.0770653	1.49123	sp.Q9BTC8.MTA3_HUMAN	0.116889	0.480651	0.788688	-0.0665568	0.130681	0.547208	Scaling	Scaling	Scaling	Buffering
MTAP	0.751652	-0.441987	0.0922726	-0.818481	0.792568	0.376494	sp.Q13126.MTAP_HUMAN	0.889932	-0.0913056	0.0861789	-0.670263	0.435843	0.578957	Anti-Scaling	Scaling	Buffering	Scaling
MTHFD1	2.83957e-06	0.647456	0.218291	-0.427597	0.0125209	1.07505	sp.P11586.C1TC_HUMAN	0.365524	0.317635	0.00890122	-0.62431	0.0344112	0.941945	Scaling	Scaling	Scaling	Scaling
MTHFD1L	0.736325	-0.176825	0.289007	-0.180496	0.994436	0.00367066	sp.Q6UB35.C1TM_HUMAN	0.645369	0.140399	0.0476857	-0.477336	0.119788	0.617735	Anti-Scaling	Buffering	Buffering	Scaling
MTHFD2	0.591202	0.193584	0.637966	0.17421	0.967167	0.0193742	sp.P13995.MTDC_HUMAN	0.0283918	0.586434	0.800524	0.131742	0.418457	0.454692	Buffering	Anti-Scaling	Scaling	Anti-Scaling
MTHFSD	0.324271	-0.230043	0.113613	-0.376137	0.627569	0.146094	sp.Q2M296.MTHSD_HUMAN	0.794047	-0.0820872	0.429467	-0.0770185	0.987229	-0.00506871	Anti-Scaling	Scaling	Buffering	Buffering
MTIF2	0.170219	0.212609	0.112939	-0.463835	0.040961	0.676444	sp.P46199.IF2M_HUMAN	0.198449	0.304684	0.376476	-0.2494	0.118775	0.554084	Buffering	Scaling	Scaling	Buffering
MTIF3	0.00857514	0.79942	0.254038	-0.221352	0.00257072	1.02077	sp.Q9H2K0.IF3M_HUMAN	0.0449219	0.532276	0.529189	-0.137412	0.0339177	0.669688	Scaling	Buffering	Scaling	Buffering
MTMR2	0.730993	-0.070065	0.938496	0.0174461	0.749426	-0.0875112	sp.Q13614.MTMR2_HUMAN	0.309515	0.396378	0.542768	0.174929	0.620946	0.221449	Buffering	Buffering	Scaling	Anti-Scaling
MTMR6	0.258037	0.316559	0.0315497	-0.590408	0.0177113	0.906967	sp.Q9Y217.MTMR6_HUMAN	0.130636	0.897588	0.0502525	-0.478517	0.0371076	1.37611	Scaling	Scaling	Scaling	Scaling
MTMR9	0.143049	0.29436	9.91186e-05	-0.59836	0.000374383	0.892719	sp.Q96QG7.MTMR9_HUMAN	0.395242	0.292541	0.0189158	-0.571601	0.0333513	0.864143	Scaling	Scaling	Scaling	Scaling
MTO1	0.4901	0.462692	0.0815332	-0.323738	0.287158	0.78643	sp.Q9Y2Z2.6.MTO1_HUMAN	0.959597	0.0169542	0.0418767	-0.24325	0.474463	0.260204	Scaling	Scaling	Buffering	Buffering
MTPAP	0.0622711	0.353602	6.22641e-10	-0.928725	8.74603e-05	1.28233	sp.Q9NVV4.PAPD1_HUMAN	0.15474	0.548024	0.000154997	-0.708137	0.0114131	1.25616	Scaling	Scaling	Scaling	Scaling
MTRF1	0.0523711	0.539961	0.0302427	-0.447102	0.00400109	0.987063	sp.O75570.RF1M_HUMAN	0.852491	0.0661582	0.0772059	-0.287071	0.358693	0.353229	Scaling	Scaling	Buffering	Scaling
MTRF1L	0.814944	-0.103231	0.00220241	-0.598738	0.327202	0.495507	sp.Q9UGC7.RF1ML_HUMAN	0.301866	0.585598	0.00122327	-0.861354	0.0604361	1.44695	Anti-Scaling	Scaling	Scaling	Scaling
MTSS1L	0.150929	1.12532	0.48476	-0.450128	0.101639	1.57545	sp.Q765P7.MTSSL_HUMAN	0.270818	0.51218	0.893058	0.0442776	0.364834	0.467902	Scaling	Scaling	Scaling	Buffering
MTUS1	0.96006	0.0374533	0.0463592	1.20577	0.186282	-1.16832	sp.Q9ULD2.MTUS1_HUMAN	0.429663	-0.508978	0.757443	-0.106711	0.557873	-0.402267	Buffering	Anti-Scaling	Anti-Scaling	Buffering
MUS81	0.804814	0.0667312	0.62287	0.136842	0.849443	-0.070111	sp.Q96NY9.MUS81_HUMAN	0.132046	0.689147	0.742345	-0.0410392	0.117204	0.730187	Buffering	Anti-Scaling	Scaling	Buffering
MVB12A	0.0824557	0.199141	0.0545942	-1.01775	0.0356064	1.21689	sp.Q96EY5.MB12A_HUMAN	0.662352	-0.335101	0.226213	-0.436878	0.895942	0.101777	Buffering	Scaling	Anti-Scaling	Scaling
MVB12B	0.323467	-0.409689	0.643002	-0.26022	0.818258	-0.149469	sp.Q9H7P6.MB12B_HUMAN	0.181315	-0.556673	0.456437	-0.734465	0.856596	0.177791	Anti-Scaling	Scaling	Anti-Scaling	Scaling
MVD	0.514186	0.470838	0.876646	-0.0349864	0.495723	0.505825	sp.P53602.MVD1_HUMAN	0.918364	0.0284834	0.307909	0.159875	0.660998	-0.131392	Scaling	Buffering	Buffering	Anti-Scaling
MVK	0.0382918	1.38673	0.949614	-0.0500791	0.164581	1.43681	sp.Q03426.KIME_HUMAN	0.0447078	0.709844	0.414496	0.305712	0.339675	0.404133	Scaling	Buffering	Scaling	Anti-Scaling
MVP	0.350353	1.06065	0.4486	-0.635585	0.20253	1.69624	sp.Q14764.MVP_HUMAN	0.930113	0.0529654	0.838659	-0.117338	0.828076	0.170303	Scaling	Scaling	Buffering	Buffering
MYBBP1A	0.990288	-0.0094597	0.0197313	-0.771988	0.386702	0.762528	sp.Q9BQG0.2.MBB1A_HUMAN	0.400146	0.497039	0.0384371	-0.41469	0.181144	0.911729	Buffering	Scaling	Scaling	Scaling
MYCBP2	0.0492792	0.880246	0.00422377	-0.855538	0.00184522	1.73578	sp.O75592.MYCB2_HUMAN	0.0230702	1.2684	0.0827526	-0.379346	0.00654561	1.64775	Scaling	Scaling	Scaling	Scaling
MYH10	0.903098	0.0959569	0.13727	-1.15416	0.234826	1.25012	sp.P35580.4.MYH10_HUMAN	0.535533	-0.268139	0.18514	-0.367126	0.830348	0.0989872	Buffering	Scaling	Anti-Scaling	Scaling
MYH11	0.631999	0.34613	0.00973728	-0.263608	0.427809	0.609738	sp.P35749.2.MYH11_HUMAN	0.586058	-0.339831	0.837914	-0.0506484	0.649778	-0.289183	Scaling	Scaling	Anti-Scaling	Buffering
MYH14	0.219054	1.41898	0.120575	-1.8298	0.0356525	3.24878	sp.Q7Z406.6.MYH14_HUMAN	0.275671	0.601705	0.0895607	-0.725178	0.0473801	1.32688	Scaling	Scaling	Scaling	Scaling
MYH3	0.483336	0.282932	0.823974	0.0423732	0.560981	0.240559	sp.P11055.MYH3_HUMAN	0.109001	0.798423	0.256329	-1.22778	0.100014	2.0262	Scaling	Buffering	Scaling	Scaling
MYL12A	0.861154	0.0946762	0.591961	-0.201418	0.640656	0.296094	sp.P19105.ML12A_HUMAN	0.465836	-0.395162	0.210316	0.5993	0.156011	-0.994462	Buffering	Buffering	Anti-Scaling	Anti-Scaling
MYL6	0.273948	0.51022	0.711174	-0.176177	0.277166	0.686397	sp.P60660.2.MYL6_HUMAN	0.0297901	-0.670915	0.589114	-0.118699	0.0892813	-0.552217	Scaling	Buffering	Anti-Scaling	Buffering
MYL6	0.273948	0.51022	0.711174	-0.176177	0.277166	0.686397	tr.G3V1V0.G3V1V0_HUMAN	0.259284	-0.526206	0.753658	-0.0796598	0.33713	-0.446547	Scaling	Buffering	Anti-Scaling	Buffering
MYL6B	0.892705	-0.0832156	0.585651	-0.136169	0.933939	0.0529537	sp.P14649.MYL6B_HUMAN	0.0753079	-0.458054	0.867723	-0.0431249	0.216883	-0.414929	Buffering	Buffering	Anti-Scaling	Buffering
MYO1C	0.176906	0.817729	0.0042498	-1.91636	0.00283486	2.73409	sp.O00159.MYO1C_HUMAN	0.285354	0.549136	0.0181893	-1.16334	0.0178853	1.71248	Scaling	Scaling	Scaling	Scaling
MYO1G	0.70035	-0.192539	0.178744	2.00405	0.149865	-2.19659	sp.B0I1T2.MYO1G_HUMAN	0.695308	-0.132509	0.35814	-0.469955	0.518198	0.337446	Anti-Scaling	Anti-Scaling	Anti-Scaling	Scaling
MYO6	0.764833	-0.469541	0.232424	-0.953754	0.772652	0.484212	sp.Q9UM54.6.MYO6_HUMAN	0.621833	-0.212464	0.370582	-0.38663	0.752583	0.174166	Anti-Scaling	Scaling	Anti-Scaling	Scaling
MYO9B	0.0800934	0.953131	0.895923	-0.167532	0.428363	1.12066	sp.Q13459.MYO9B_HUMAN	0.230756	0.505889	0.359917	-0.583462	0.148575	1.08935	Scaling	Buffering	Scaling	Scaling
MZT1	0.0129199	0.549893	0.101308	-0.464092	0.00370539	1.01399	sp.Q08AG7.MZT1_HUMAN	0.638375	0.151053	0.950556	-0.0158297	0.654155	0.166882	Scaling	Scaling	Buffering	Buffering
N4BP1	0.146956	0.227234	0.195941	-0.561854	0.0888222	0.789087	sp.O75113.N4BP1_HUMAN	0.152422	0.302983	0.25495	-0.285434	0.0611143	0.588417	Buffering	Scaling	Scaling	Scaling
N4BP2L1	0.717525	0.313366	0.982116	0.0104865	0.749146	0.30288	sp.Q5TBK1.N42L1_HUMAN	0.553471	-0.346874	0.666596	-0.280651	0.930124	-0.0662234	Scaling	Buffering	Anti-Scaling	Scaling
N4BP2L2	0.230631	0.324564	0.0837172	-0.306196	0.0483997	0.630759	sp.Q92802.N42L2_HUMAN	0.76731	-0.136645	0.0499059	-0.624043	0.363988	0.487398	Scaling	Scaling	Anti-Scaling	Scaling
NAA16	0.131376	0.257346	0.0296859	-0.555771	0.00587569	0.813117	sp.Q6N069.NAA16_HUMAN	0.0733169	0.741285	0.198825	-0.213639	0.0319349	0.954924	Scaling	Scaling	Scaling	Buffering
NAA20	0.00821268	0.622203	0.207695	-0.194404	0.00251132	0.816607	sp.P61599.NAA20_HUMAN	0.228023	0.188193	0.485944	0.143894	0.846576	0.0442999	Scaling	Buffering	Buffering	Anti-Scaling
NAA25	0.0981105	0.64194	0.541153	-0.181586	0.0761224	0.823526	sp.Q14CX7.NAA25_HUMAN	0.933707	0.0331113	0.680523	-0.149882	0.717381	0.182993	Scaling	Buffering	Buffering	Buffering
NAA30	0.0562495	0.740865	0.12517	-0.25544	0.019372	0.996305	sp.Q147X3.NAA30_HUMAN	0.00964324	0.624961	0.399086	-0.237002	0.0167517	0.861963	Scaling	Scaling	Scaling	Buffering
NAA35	0.00097751	0.537197	0.046442	-0.551929	0.00272082	1.08913	sp.Q5VZE5.NAA35_HUMAN	0.378605	-0.329102	0.671105	0.102658	0.313676	-0.43176	Scaling	Scaling	Anti-Scaling	Anti-Scaling
NAA40	0.846682	0.0430464	0.8634	0.0296526	0.958947	0.0133938	sp.Q86UY6.NAA40_HUMAN	0.387857	-0.169069	0.525898	-0.116206	0.818125	-0.0528634	Buffering	Buffering	Anti-Scaling	Buffering
NAB2	0.357061	-0.479849	0.401651	-0.413134	0.913835	-0.0667156	sp.Q15742.NAB2_HUMAN	0.539972	-0.372183	0.783945	-0.174637	0.808227	-0.197547	Anti-Scaling	Scaling	Anti-Scaling	Buffering
NABP2	0.00263035	0.951811	0.356632	-0.126432	0.00168636	1.07824	sp.Q9BQ15.SOSB1_HUMAN	0.370031	0.453397	0.017965	-0.739363	0.0642264	1.19276	Scaling	Buffering	Scaling	Scaling
NACA	1.02175e-05	0.381021	0.46831	-0.264228	0.159545	0.645249	tr.E9PAV3.E9PAV3_HUMAN	0.57719	-0.132601	0.0892235	-0.346	0.421153	0.213399	Scaling	Scaling	Anti-Scaling	Scaling
NACC1	5.38871e-12	-0.576011	0.495462	-0.511118	0.925962	-0.0648925	sp.Q96RE7.NACC1_HUMAN	0.264479	-0.61203	0.530279	-0.456486	0.842392	-0.155544	Anti-Scaling	Scaling	Anti-Scaling	Scaling
NACC2	0.495316	0.210658	0.889139	-0.0818653	0.637867	0.292524	sp.Q96BF6.NACC2_HUMAN	0.604879	0.173325	0.997228	-0.00167899	0.755979	0.175004	Buffering	Buffering	Buffering	Buffering
NADSYN1	0.136558	0.37104	0.263984	0.449315	0.855262	-0.0782742	sp.Q6IA69.NADE_HUMAN	0.429093	0.325972	0.144198	0.198781	0.749165	0.127191	Scaling	Anti-Scaling	Scaling	Anti-Scaling
NAE1	0.120283	0.525488	0.00864883	-0.650411	0.00647564	1.1759	sp.Q13564.ULA1_HUMAN	0.504619	0.0624346	0.0808291	-0.250595	0.0366029	0.31303	Scaling	Scaling	Buffering	Scaling
NAGK	0.606142	0.266551	0.582816	0.369387	0.89649	-0.102836	sp.Q9UJ70.2.NAGK_HUMAN	0.649052	-0.140556	0.531016	0.221362	0.414044	-0.361918	Scaling	Anti-Scaling	Anti-Scaling	Anti-Scaling
NAGPA	0.0957408	1.14768	0.0142706	-0.64461	0.0249821	1.79229	sp.Q9UK23.NAGPA_HUMAN	0.00646422	0.839445	0.441834	0.201398	0.0421221	0.638047	Scaling	Scaling	Scaling	Anti-Scaling
NANP	0.0662761	0.358386	0.0456511	-0.314848	0.00549732	0.673234	sp.Q8TBE9.NANP_HUMAN	0.126432	0.264358	0.111831	-0.299973	0.0180387	0.564331	Scaling	Scaling	Scaling	Scaling
NANS	0.00859307	0.537877	0.984408	0.0075312	0.223882	0.530346	sp.Q9NR45.SIAS_HUMAN	0.630086	-0.0814659	0.835406	0.0419006	0.605348	-0.123367	Scaling	Buffering	Buffering	Buffering
NAP1L1	0.965362	-0.0149344	0.481189	-0.41743	0.527943	0.402495	sp.P55209.NP1L1_HUMAN	0.573548	-0.1759	0.250212	-0.584135	0.422932	0.408235	Buffering	Scaling	Anti-Scaling	Scaling
NAPA	0.0878149	0.476878	0.96201	-0.0177676	0.28004	0.494645	sp.P54920.SNAA_HUMAN	0.0140816	0.424947	0.990949	0.00565979	0.443823	0.419287	Scaling	Buffering	Scaling	Buffering
NAPB	0.0877834	0.286128	0.0820693	-0.53003	0.0163537	0.816159	sp.Q9H115.SNAB_HUMAN	0.763428	-0.0666378	0.43201	-0.220864	0.637731	0.154226	Scaling	Scaling	Buffering	Buffering
NAPG	0.81461	0.0297634	0.0535293	-0.510729	0.0486402	0.540492	sp.Q99747.SNAG_HUMAN	0.483661	0.238647	0.17157	-0.266227	0.196089	0.504874	Buffering	Scaling	Buffering	Scaling
NARS2	0.639951	0.157871	0.476078	-0.385016	0.381963	0.542887	sp.Q96I59.SYNM_HUMAN	0.141375	0.355838	0.753517	-0.153128	0.340437	0.508966	Buffering	Scaling	Scaling	Buffering
NAT1	0.000813694	0.880466	0.685789	0.0893023	0.00999116	0.791164	sp.P18440.ARY1_HUMAN	0.00253667	1.04457	0.353232	-0.217459	0.00117271	1.26203	Scaling	Buffering	Scaling	Buffering
NAT14	0.0612997	0.523834	0.761558	0.300941	0.822841	0.222893	sp.Q8WUY8.NAT14_HUMAN	0.860399	0.0934023	0.829819	-0.125128	0.768339	0.218531	Scaling	Anti-Scaling	Buffering	Buffering
NBAS	0.569297	0.230476	0.319762	-0.290014	0.280394	0.52049	sp.A2RRP1.NBAS_HUMAN	0.639907	0.133726	0.566829	-0.198325	0.436919	0.332051	Buffering	Scaling	Buffering	Buffering
NBEA	0.160001	-0.696929	0.310093	-0.305666	0.448123	-0.391263	sp.Q8NFP9.NBEA_HUMAN	0.599935	-0.133776	0.697896	-0.0567016	0.77024	-0.0770748	Anti-Scaling	Scaling	Anti-Scaling	Buffering
NCAM1	0.391855	-0.730393	0.898293	0.103125	0.447397	-0.833519	sp.P13591.NCAM1_HUMAN	0.504593	-0.459618	0.720022	0.26333	0.448291	-0.722949	Anti-Scaling	Anti-Scaling	Anti-Scaling	Anti-Scaling
NCAPD2	0.00459024	0.440851	0.0179395	-0.578533	0.000488174	1.01938	sp.Q15021.CND1_HUMAN	0.646283	-0.0851324	0.761971	0.119445	0.626421	-0.204577	Scaling	Scaling	Buffering	Anti-Scaling
NCAPD3	0.0510872	0.45122	0.0788041	-0.773393	0.0142792	1.22461	sp.P42695.CNDD3_HUMAN	0.527517	-0.158308	0.268745	-0.243561	0.780203	0.0852534	Scaling	Scaling	Anti-Scaling	Buffering
NCBP1	0.344802	0.169461	0.0581274	-0.857235	0.0311117	1.0267	sp.Q09161.NCBP1_HUMAN	0.000438141	0.271767	0.527856	-0.1667	0.140522	0.438468	Buffering	Scaling	Scaling	Buffering
NCKAP5L	0.146846	-1.53213	0.662262	0.0848886	0.13143	-1.61701	sp.Q9HCH0.NCK5L_HUMAN	0.199748	-1.20216	0.76972	0.184872	0.177569	-1.38703	Anti-Scaling	Buffering	Anti-Scaling	Anti-Scaling
NCLN	0.897505	-0.0418142	0.322963	-0.394744	0.444336	0.35293	sp.Q969V3.NCLN_HUMAN	0.809158	-0.155668	0.693673	-0.200526	0.9532	0.0448585	Buffering	Scaling	Anti-Scaling	Buffering
NCOA1	0.709098	0.141527	0.854318	0.0423495	0.810583	0.0991776	sp.Q15788.NCOA1_HUMAN	0.209647	0.893495	0.527133	0.143552	0.264688	0.749943	Buffering	Buffering	Scaling	Anti-Scaling
NCOA7	0.578822	0.963866	0.909387	-0.0657948	0.56436	1.02966	sp.Q8NI08.NCOA7_HUMAN	0.617603	0.417472	0.373973	0.22181	0.813522	0.195662	Scaling	Buffering	Scaling	Anti-Scaling
NCOR1	0.364804	0.374961	0.000210689	-0.798746	0.048408	1.17371	sp.O75376.NCOR1_HUMAN	0.441801	0.262117	0.12521	-0.236717	0.199033	0.498834	Scaling	Scaling	Scaling	Buffering
NCOR2	0.716311	0.13749	0.92774	-0.0692839	0.801324	0.206773	sp.Q9Y618.3.NCOR2_HUMAN	0.649302	0.175634	0.688513	0.339872	0.852596	-0.164238	Buffering	Buffering	Buffering	Anti-Scaling
NCS1	0.711341	0.187855	0.766812	0.125059	0.914871	0.0627957	sp.P62166.NCS1_HUMAN	0.136402	0.706627	0.893941	-0.0461219	0.161016	0.752749	Buffering	Anti-Scaling	Scaling	Buffering
NDC80	0.985696	-0.00688964	0.0832763	-0.53908	0.262196	0.532191	sp.O14777.NDC80_HUMAN	0.0624843	0.636581	0.725014	-0.0537672	0.0476571	0.690348	Buffering	Scaling	Scaling	Buffering
NDE1	0.413091	0.157295	0.0209656	-0.84467	0.0125459	1.00197	sp.Q9NXR1.2.NDE1_HUMAN	0.802316	-0.067121	0.116916	-0.300197	0.447492	0.233076	Buffering	Scaling	Buffering	Scaling
NDEL1	0.22411	0.249715	0.000543981	-0.876502	0.00114826	1.12622	sp.Q9GZM8.2.NDEL1_HUMAN	0.735273	0.14344	0.0584271	-0.409993	0.268646	0.553433	Buffering	Scaling	Buffering	Scaling
NDFIP2	0.977941	0.0138575	0.0969493	-0.904338	0.182745	0.918195	sp.Q9NV92.NFIP2_HUMAN	0.426917	-0.626514	0.178776	-0.857036	0.797498	0.230522	Buffering	Scaling	Anti-Scaling	Scaling
NDOR1	0.374923	0.153606	0.376331	-0.327662	0.231655	0.481268	sp.Q9UHB4.2.NDOR1_HUMAN	0.685317	-0.135915	0.222091	-0.782707	0.303199	0.646792	Buffering	Scaling	Anti-Scaling	Scaling
NDRG2	0.676715	-0.522563	0.0862319	-1.28737	0.57845	0.764804	sp.Q9UN36.NDRG2_HUMAN	0.155778	-2.17009	0.00150718	-1.20366	0.468139	-0.966424	Anti-Scaling	Scaling	Anti-Scaling	Scaling
NDUFA12	0.0269382	0.596934	0.233215	-0.269269	0.0137488	0.866203	sp.Q9UI09.NDUAC_HUMAN	0.565122	0.284112	0.44821	-0.220233	0.363065	0.504345	Scaling	Scaling	Scaling	Buffering
NDUFA13	0.0169838	0.588918	0.253249	-0.447447	0.0529212	1.03636	sp.Q9P0J0.NDUAD_HUMAN	0.821245	0.0976193	0.830449	-0.0757402	0.741141	0.173359	Scaling	Scaling	Buffering	Buffering
NDUFA3	0.0551032	0.583669	0.946357	0.0376592	0.392782	0.54601	sp.O95167.NDUA3_HUMAN	0.706108	-0.176719	0.597987	0.0709598	0.603642	-0.247679	Scaling	Buffering	Anti-Scaling	Buffering
NDUFA4	0.00732093	0.46357	6.24658e-10	-0.983435	1.09953e-09	1.447	sp.O00483.NDUA4_HUMAN	0.672061	-0.0650289	0.0226157	-0.310483	0.110777	0.245454	Scaling	Scaling	Buffering	Scaling
NDUFA7	0.0821847	0.600116	0.218877	-0.443137	0.0344288	1.04325	sp.O95182.NDUA7_HUMAN	0.00925675	0.192182	0.577148	-0.236279	0.351718	0.428461	Scaling	Scaling	Buffering	Buffering
NDUFA8	0.001277	0.449752	0.966692	0.0119486	0.179108	0.437803	sp.P51970.NDUA8_HUMAN	0.143543	0.242189	0.42065	0.188044	0.830742	0.0541452	Scaling	Buffering	Buffering	Anti-Scaling
NDUFA9	0.000640287	0.568306	0.0268599	-0.615977	0.000445656	1.18428	sp.Q16795.NDUA9_HUMAN	0.7991	-0.0323227	0.453684	-0.291135	0.503252	0.258812	Scaling	Scaling	Buffering	Scaling
NDUFAB1	0.385972	0.351413	0.110366	-0.451071	0.10786	0.802484	sp.O14561.ACPM_HUMAN	0.354746	0.47597	0.441414	-0.205491	0.225125	0.681462	Scaling	Scaling	Scaling	Buffering
NDUFAF4	0.604783	-0.182427	0.0528865	-0.297308	0.74624	0.114881	sp.Q9P032.NDUF4_HUMAN	0.000690869	-0.290126	0.470036	-0.195694	0.720174	-0.0944323	Anti-Scaling	Scaling	Anti-Scaling	Buffering
NDUFAF5	0.0944302	0.407344	2.595e-05	-0.852037	0.000150101	1.25938	sp.Q5TEU4.NDUF5_HUMAN	0.0114767	0.478129	0.0643135	-0.301935	0.000820036	0.780064	Scaling	Scaling	Scaling	Scaling
NDUFAF7	0.331936	0.291289	0.0223886	-0.575438	0.0320761	0.866727	sp.Q7L592.NDUF7_HUMAN	0.0183155	0.971353	0.0494423	-0.44829	0.00273664	1.41964	Scaling	Scaling	Scaling	Scaling
NDUFB1	0.839901	-0.100518	0.168092	-0.334103	0.66314	0.233584	sp.O75438.NDUB1_HUMAN	0.325914	0.368831	0.345153	-0.261745	0.161437	0.630575	Anti-Scaling	Scaling	Scaling	Scaling
NDUFB10	0.785462	-0.0624472	0.00114697	-0.932215	0.019268	0.869768	sp.O96000.NDUBA_HUMAN	0.96923	-0.00442998	0.0380587	-0.276914	0.0953195	0.272484	Buffering	Scaling	Buffering	Scaling
NDUFB6	0.154055	-0.202723	0.106516	-0.292616	0.648539	0.0898925	sp.O95139.NDUB6_HUMAN	0.0159959	0.452575	0.399568	0.112747	0.0595093	0.339828	Anti-Scaling	Scaling	Scaling	Anti-Scaling
NDUFB7	0.40125	0.199655	0.0912898	-0.491359	0.0531967	0.691014	sp.P17568.NDUB7_HUMAN	0.647118	0.345668	0.462282	-0.259364	0.460379	0.605032	Buffering	Scaling	Scaling	Scaling
NDUFC2	0.0558897	0.407137	0.84165	0.0558271	0.278014	0.35131	sp.O95298.NDUC2_HUMAN	0.300164	0.253233	0.402084	-0.117235	0.168522	0.370469	Scaling	Buffering	Scaling	Buffering
NDUFS7	0.0175319	1.0779	0.0401682	-0.45705	0.00311279	1.53495	sp.O75251.NDUS7_HUMAN	0.525056	0.524312	0.629617	-0.320785	0.398333	0.845097	Scaling	Scaling	Scaling	Scaling
NDUFS8	0.473359	0.0756228	0.136682	0.357926	0.246639	-0.282303	sp.O00217.NDUS8_HUMAN	0.195768	0.256583	0.966494	-0.0105401	0.371844	0.267123	Buffering	Anti-Scaling	Scaling	Buffering
NDUFV1	0.400534	0.234223	0.798387	0.0369662	0.509432	0.197257	sp.P49821.NDUV1_HUMAN	0.939755	-0.0217836	0.547999	0.0898682	0.721122	-0.111652	Buffering	Buffering	Buffering	Buffering
NDUFV2	0.201784	0.388106	0.0120867	-0.637123	0.0131187	1.02523	sp.P19404.NDUV2_HUMAN	0.629012	-0.3555	0.693405	-0.0988302	0.733537	-0.25667	Scaling	Scaling	Anti-Scaling	Buffering
NEBL	0.70356	-0.431017	0.692187	-0.19673	0.842614	-0.234287	sp.O76041.NEBL_HUMAN	0.872522	-0.0949223	0.294557	-1.78286	0.331868	1.68794	Anti-Scaling	Buffering	Buffering	Scaling
NEBL	0.70356	-0.431017	0.692187	-0.19673	0.842614	-0.234287	sp.O76041.2.NEBL_HUMAN	0.505178	-0.486868	0.00061633	-0.7753	0.687562	0.288432	Anti-Scaling	Buffering	Anti-Scaling	Scaling
NECAP1	9.84983e-05	0.722299	0.698555	-0.166874	0.125975	0.889172	sp.Q8NC96.NECP1_HUMAN	0.000567445	0.634896	0.490887	-0.406363	0.1565	1.04126	Scaling	Buffering	Scaling	Scaling
NEDD1	0.102403	0.620675	0.992714	0.00645947	0.43904	0.614215	sp.Q8NHV4.NEDD1_HUMAN	0.739751	-0.0362442	0.193372	-0.499223	0.212482	0.462979	Scaling	Buffering	Buffering	Scaling
NEFL	0.593997	0.371407	0.978547	0.0140404	0.660035	0.357366	sp.P07196.NFL_HUMAN	0.195295	0.815005	0.721685	0.207668	0.442162	0.607337	Scaling	Buffering	Scaling	Anti-Scaling
NEFM	0.473533	0.305237	0.509254	0.154572	0.747058	0.150666	sp.P07197.NFM_HUMAN	0.757857	0.113166	0.37769	-0.285695	0.3493	0.398861	Scaling	Anti-Scaling	Buffering	Scaling
NEIL2	0.29251	0.315194	0.0562518	-0.604872	0.0259097	0.920067	sp.Q969S2.NEIL2_HUMAN	0.17264	0.369298	0.0106749	-0.644465	0.00372587	1.01376	Scaling	Scaling	Scaling	Scaling
NEK3	0.0754338	0.913393	0.275032	-0.533565	0.0315729	1.44696	sp.P51956.NEK3_HUMAN	0.252203	0.370206	0.3802	-0.607688	0.184364	0.977893	Scaling	Scaling	Scaling	Scaling
NEK6	0.0488688	0.54437	0.793026	0.221559	0.70762	0.322811	sp.Q9HC98.2.NEK6_HUMAN	0.0556542	-0.262646	0.670668	-0.153748	0.76338	-0.108898	Scaling	Anti-Scaling	Anti-Scaling	Buffering
NEK9	0.10509	0.792112	0.0467479	-0.804349	0.0110408	1.59646	sp.Q8TD19.NEK9_HUMAN	0.33068	0.337127	0.000570168	-0.77063	0.0164537	1.10776	Scaling	Scaling	Scaling	Scaling
NELFB	0.0569404	0.271938	0.461604	-0.171944	0.107277	0.443882	sp.Q8WX92.NELFB_HUMAN	0.394644	0.0802916	0.684052	0.0780215	0.990936	0.00227004	Scaling	Buffering	Buffering	Buffering
NEMF	0.00441618	0.820885	0.0255586	-0.664955	0.000343137	1.48584	sp.O60524.NEMF_HUMAN	0.187404	0.338874	0.106112	-0.345425	0.0356361	0.684299	Scaling	Scaling	Scaling	Scaling
NET1	0.0346574	-0.429116	0.0246941	-0.833867	0.254243	0.404751	sp.Q7Z628.ARHG8_HUMAN	0.920168	-0.0307922	0.115924	-0.370884	0.337728	0.340092	Anti-Scaling	Scaling	Buffering	Scaling
NEU3	0.230248	0.399586	0.442799	-0.332147	0.165206	0.731734	sp.Q9UQ49.NEUR3_HUMAN	0.150962	0.642967	0.597508	-0.17286	0.10703	0.815827	Scaling	Scaling	Scaling	Buffering
NEURL4	0.736816	-0.082768	0.0445666	-0.492033	0.208188	0.409265	sp.Q96JN8.NEUL4_HUMAN	0.2942	0.339842	0.102787	-0.233928	0.12184	0.573771	Buffering	Scaling	Scaling	Buffering
NFAT5	0.692534	0.0976992	0.0954201	-0.768456	0.0813525	0.866156	sp.O94916.5.NFAT5_HUMAN	0.131652	0.438695	0.113647	-0.606654	0.0252949	1.04535	Buffering	Scaling	Scaling	Scaling
NFATC2IP	0.0596941	-0.6264	0.087022	-0.695944	0.863008	0.0695434	sp.Q8NCF5.NF2IP_HUMAN	0.902104	-0.0177834	0.981315	-0.00832473	0.978762	-0.00945868	Anti-Scaling	Scaling	Buffering	Buffering
NFATC3	0.497664	0.243013	0.0197042	-0.673881	0.0449269	0.916894	sp.Q12968.NFAC3_HUMAN	0.693582	-0.231946	0.4083	-0.28475	0.932778	0.0528036	Buffering	Scaling	Anti-Scaling	Scaling
NFATC4	0.792917	0.364085	0.10007	-1.1446	0.327562	1.50869	sp.Q14934.4.NFAC4_HUMAN	0.410365	0.510429	0.253562	-0.795531	0.138507	1.30596	Scaling	Scaling	Scaling	Scaling
NFIB	0.880293	-0.138785	0.617002	0.170847	0.741802	-0.309632	tr.Q5VW26.Q5VW26_HUMAN	0.515996	-0.453663	0.393794	-0.280884	0.806776	-0.172779	Anti-Scaling	Anti-Scaling	Anti-Scaling	Scaling
NFIC	0.250877	-1.68226	0.46709	-0.446507	0.370979	-1.23575	sp.P08651.NFIC_HUMAN	0.0771186	-1.59289	0.210512	-0.426303	0.122956	-1.16659	Anti-Scaling	Scaling	Anti-Scaling	Scaling
NFIL3	0.031909	0.927098	0.542215	0.235262	0.173868	0.691835	sp.Q16649.NFIL3_HUMAN	0.260893	0.491857	0.555991	0.147186	0.439812	0.344671	Scaling	Anti-Scaling	Scaling	Anti-Scaling
NFIX	0.233892	-2.00275	0.413584	-1.29496	0.704941	-0.707792	sp.Q14938.3.NFIX_HUMAN	0.102401	-1.56645	0.473426	-0.345774	0.159607	-1.22068	Anti-Scaling	Scaling	Anti-Scaling	Scaling
NFKBIB	0.0173225	0.393244	0.206089	0.239293	0.42624	0.153951	sp.Q15653.2.IKBB_HUMAN	0.378658	-0.581311	0.536158	0.413493	0.268911	-0.994805	Scaling	Anti-Scaling	Anti-Scaling	Anti-Scaling
NFRKB	0.124854	0.246016	0.00151568	-0.704105	0.000398666	0.950122	sp.Q6P4R8.NFRKB_HUMAN	0.119181	0.378196	0.431001	-0.182143	0.0795242	0.56034	Buffering	Scaling	Scaling	Buffering
NFU1	0.0805686	0.390603	0.159873	-0.645978	0.0510923	1.03658	sp.Q9UMS0.NFU1_HUMAN	0.29787	0.552975	0.578142	-0.119904	0.229247	0.672879	Scaling	Scaling	Scaling	Buffering
NFX1	0.210953	0.338644	0.0778931	-0.309816	0.0454814	0.64846	sp.Q12986.NFX1_HUMAN	0.296232	0.586174	0.385233	-0.16135	0.206686	0.747524	Scaling	Scaling	Scaling	Buffering
NFYB	0.0313044	0.423831	0.498197	-0.219006	0.119798	0.642837	sp.P25208.NFYB_HUMAN	0.373788	0.28251	0.848487	-0.072273	0.44539	0.354783	Scaling	Buffering	Scaling	Buffering
NGDN	0.00534422	0.788359	0.0439448	-0.556883	0.000565303	1.34524	sp.Q8NEJ9.NGDN_HUMAN	0.345186	0.372258	0.298054	-0.150592	0.213665	0.522851	Scaling	Scaling	Scaling	Buffering
NHLRC3	0.335123	-0.827708	0.101858	-0.351095	0.575547	-0.476613	sp.Q5JS37.NHLC3_HUMAN	0.138218	-0.780409	0.5897	-0.164579	0.272732	-0.61583	Anti-Scaling	Scaling	Anti-Scaling	Buffering
NHSL1	0.63709	0.616309	0.550466	-0.344215	0.494313	0.960524	sp.Q5SYE7.2.NHSL1_HUMAN	0.801276	-0.309978	0.152031	-0.653041	0.787592	0.343062	Scaling	Scaling	Anti-Scaling	Scaling
NID2	0.00578386	-0.817176	0.615035	0.447011	0.177858	-1.26419	sp.Q14112.NID2_HUMAN	0.195358	-0.84446	0.294412	0.667712	0.0772529	-1.51217	Anti-Scaling	Anti-Scaling	Anti-Scaling	Anti-Scaling
NIN	0.965212	-0.0364212	0.000432304	-0.866655	0.351137	0.830234	sp.Q8N4C6.7.NIN_HUMAN	0.547327	0.242382	0.348956	-0.198115	0.319958	0.440496	Buffering	Scaling	Buffering	Buffering
NIP7	0.0102177	0.886168	0.00104003	-0.781714	0.000162782	1.66788	sp.Q9Y221.NIP7_HUMAN	0.170177	0.241479	0.340628	-0.12848	0.0757554	0.369959	Scaling	Scaling	Buffering	Buffering
NIPSNAP3A	0.364293	0.226728	0.989498	-0.00932746	0.748111	0.236056	sp.Q9UFN0.NPS3A_HUMAN	0.743576	-0.0483224	0.0321073	0.803221	0.0262483	-0.851544	Buffering	Buffering	Buffering	Anti-Scaling
NIPSNAP3B	0.522993	-0.23424	0.737556	0.221232	0.533788	-0.455471	sp.Q9BS92.NPS3B_HUMAN	0.590351	0.0746542	0.0283628	0.875453	0.0445758	-0.800799	Anti-Scaling	Anti-Scaling	Buffering	Anti-Scaling
NLRX1	0.0274482	0.598325	0.0255922	-0.642481	0.0011886	1.24081	sp.Q86UT6.NLRX1_HUMAN	0.34938	0.411327	0.00214975	-0.589323	0.0513258	1.00065	Scaling	Scaling	Scaling	Scaling
NME3	0.560596	-0.520137	0.0661803	-0.741601	0.805603	0.221463	sp.Q13232.NDK3_HUMAN	0.317218	-0.590295	0.0300473	-0.935675	0.562869	0.34538	Anti-Scaling	Scaling	Anti-Scaling	Scaling
NME4	0.118295	1.07728	0.0377393	0.802787	0.633757	0.274492	tr.F2Z2X0.F2Z2X0_HUMAN	0.757097	0.105193	0.0328354	0.966977	0.0860104	-0.861784	Scaling	Anti-Scaling	Buffering	Anti-Scaling
NMRAL1	0.704001	0.324838	0.257204	-0.735211	0.314275	1.06005	sp.Q9HBL8.NMRL1_HUMAN	0.431143	-0.401366	0.454777	0.161906	0.301652	-0.563272	Scaling	Scaling	Anti-Scaling	Anti-Scaling
NMT2	0.126909	1.20415	0.0207931	-0.750581	0.0309904	1.95473	sp.O60551.NMT2_HUMAN	0.112394	0.776259	0.136596	-0.250441	0.0522315	1.0267	Scaling	Scaling	Scaling	Scaling
NNMT	0.698794	-0.43486	0.130449	1.69446	0.15719	-2.12932	sp.P40261.NNMT_HUMAN	0.491523	0.504584	0.411233	0.419846	0.9176	0.0847376	Anti-Scaling	Anti-Scaling	Scaling	Anti-Scaling
NOB1	0.0278365	0.677701	0.00612247	-0.69154	0.000676788	1.36924	sp.Q9ULX3.NOB1_HUMAN	0.496637	0.191582	0.236096	-0.169252	0.242958	0.360835	Scaling	Scaling	Buffering	Buffering
NOC4L	0.0680857	0.308221	0.730624	-0.154963	0.357635	0.463184	sp.Q9BVI4.NOC4L_HUMAN	0.922121	-0.0249425	0.917466	0.0285394	0.878667	-0.0534819	Scaling	Buffering	Buffering	Buffering
NOL10	0.326506	0.25567	0.244812	-0.173504	0.147296	0.429174	sp.Q9BSC4.NOL10_HUMAN	0.35377	0.177844	0.0611688	-0.440288	0.0327622	0.618132	Scaling	Buffering	Buffering	Scaling
NOL3	0.193216	0.56837	0.17117	-0.760969	0.0496384	1.32934	sp.O60936.2.NOL3_HUMAN	0.297131	0.551092	0.257688	-0.591072	0.107794	1.14216	Scaling	Scaling	Scaling	Scaling
NOL6	0.44146	0.15512	0.110197	-0.348787	0.075892	0.503907	sp.Q9H6R4.NOL6_HUMAN	0.126783	0.274879	0.12865	-0.172284	0.0307403	0.447163	Buffering	Scaling	Scaling	Buffering
NOL8	0.00193742	0.339947	0.0430955	-0.752399	0.0118659	1.09235	sp.Q76FK4.NOL8_HUMAN	0.120955	0.352716	0.169662	-0.300286	0.0316012	0.653002	Scaling	Scaling	Scaling	Scaling
NOMO1	0.121111	0.816739	0.214702	-0.318018	0.0463408	1.13476	sp.Q15155.NOMO1_HUMAN	0.363554	0.355647	0.387378	-1.98251	0.317101	2.33816	Scaling	Scaling	Scaling	Scaling
NOMO2	0.184996	0.666051	0.872857	-0.0443803	0.164098	0.710431	sp.Q5JPE7.NOMO2_HUMAN	0.0876257	0.252292	0.972173	0.00714933	0.276155	0.245142	Scaling	Buffering	Scaling	Buffering
NOP2	0.000565671	0.591994	0.308893	-1.004	0.161362	1.59599	sp.P46087.4.NOP2_HUMAN	0.0329743	0.303276	0.74005	-0.219612	0.460814	0.522888	Scaling	Scaling	Scaling	Buffering
NOP56	0.13679	0.573534	0.00109637	-0.717176	0.00507172	1.29071	sp.O00567.NOP56_HUMAN	0.00272365	0.560526	0.0534624	-0.229358	0.000236102	0.789884	Scaling	Scaling	Scaling	Buffering
NOP9	0.0710786	0.741763	0.0263688	-0.814353	0.00428535	1.55612	sp.Q86U38.NOP9_HUMAN	0.158765	0.499937	0.443402	-0.164824	0.0946307	0.664761	Scaling	Scaling	Scaling	Buffering
NOSIP	0.0253609	0.859038	0.158653	-0.598125	0.0108675	1.45716	sp.Q9Y314.NOSIP_HUMAN	0.714777	-0.176123	0.518839	-0.299271	0.841151	0.123148	Scaling	Scaling	Anti-Scaling	Scaling
NOTCH1	0.297092	0.457906	0.269833	-0.640344	0.116732	1.09825	sp.P46531.NOTC1_HUMAN	0.757089	-0.0643797	0.0394031	-1.03938	0.0487088	0.974996	Scaling	Scaling	Buffering	Scaling
NOTCH3	0.0721807	-1.56382	0.0760831	2.29842	0.0151189	-3.86224	sp.Q9UM47.NOTC3_HUMAN	0.0867242	-0.88492	0.146247	0.8349	0.0275612	-1.71982	Anti-Scaling	Anti-Scaling	Anti-Scaling	Anti-Scaling
NOVA1	0.447801	0.847995	0.0649991	0.815203	0.976646	0.032793	sp.P51513.NOVA1_HUMAN	0.38809	1.00574	0.374778	0.600058	0.740879	0.405679	Scaling	Anti-Scaling	Scaling	Anti-Scaling
NOVA2	0.000858831	-0.222641	0.336232	-0.128443	0.442368	-0.0941975	sp.Q9UNW9.NOVA2_HUMAN	0.994182	-0.00440697	0.843635	-0.11305	0.889832	0.108643	Anti-Scaling	Buffering	Buffering	Buffering
NPAT	0.237865	0.198097	0.0785372	-0.528706	0.0303256	0.726803	sp.Q14207.NPAT_HUMAN	0.499262	0.140016	0.176643	-0.365165	0.119452	0.505181	Buffering	Scaling	Buffering	Scaling
NPC2	0.791758	-0.178983	0.638778	0.194571	0.625894	-0.373555	sp.P61916.NPC2_HUMAN	0.0595035	-0.681888	0.0869818	0.612276	0.00840063	-1.29416	Anti-Scaling	Anti-Scaling	Anti-Scaling	Anti-Scaling
NQO1	0.249784	0.987537	0.55698	-0.532677	0.192908	1.52021	sp.P15559.NQO1_HUMAN	0.936239	0.055311	0.0768319	-0.897803	0.244888	0.953114	Scaling	Scaling	Buffering	Scaling
NR2C1	0.0387878	0.635818	0.556257	-0.255042	0.114857	0.890861	sp.P13056.NR2C1_HUMAN	0.546592	0.134002	0.416875	-0.370127	0.305491	0.504129	Scaling	Scaling	Buffering	Scaling
NR2C2AP	0.777648	0.117751	0.00866215	-0.569398	0.191576	0.687149	sp.Q86WQ0.NR2CA_HUMAN	0.0518718	1.26048	0.714368	-0.31878	0.159102	1.57926	Buffering	Scaling	Scaling	Scaling
NR2F6	0.309558	-0.505298	0.717921	-0.319921	0.842601	-0.185377	sp.P10588.NR2F6_HUMAN	0.613471	-0.353781	0.35656	-0.491025	0.860028	0.137245	Anti-Scaling	Scaling	Anti-Scaling	Scaling
NRBP1	0.038649	0.95815	0.918475	0.043151	0.107466	0.914999	sp.Q9UHY1.NRBP_HUMAN	0.973077	-0.0187066	0.874156	0.0412801	0.919173	-0.0599867	Scaling	Buffering	Buffering	Buffering
NRDE2	0.317169	0.386502	0.0629433	-0.530255	0.0566884	0.916757	sp.Q9H7Z3.NRDE2_HUMAN	0.0699301	0.552474	0.0805753	-0.257599	0.0187594	0.810073	Scaling	Scaling	Scaling	Scaling
NRG1	0.848357	-0.145816	0.113395	1.15536	0.186296	-1.30118	sp.Q02297.2.NRG1_HUMAN	0.653932	0.37713	0.0967474	1.26978	0.379661	-0.892653	Anti-Scaling	Anti-Scaling	Scaling	Anti-Scaling
NRGN	0.0724314	-0.743553	0.374119	-0.475407	0.653	-0.268147	sp.Q92686.NEUG_HUMAN	0.287153	-1.08764	0.520298	-0.229962	0.392228	-0.85768	Anti-Scaling	Scaling	Anti-Scaling	Buffering
NRP1	0.737157	-0.263664	0.444443	0.519959	0.415303	-0.783623	sp.O14786.NRP1_HUMAN	0.708256	-0.291172	0.991712	-0.00339174	0.72124	-0.28778	Anti-Scaling	Anti-Scaling	Anti-Scaling	Buffering
NSFL1C	0.0164989	0.370992	0.0419749	-0.421335	0.00182195	0.792327	sp.Q9UNZ2.NSF1C_HUMAN	0.257641	0.154384	0.117187	-0.432589	0.048343	0.586972	Scaling	Scaling	Buffering	Scaling
NSMCE1	0.362326	0.697421	0.0031508	-0.659513	0.142764	1.35693	sp.Q8WV22.NSE1_HUMAN	0.431818	0.165155	0.872413	-0.0320315	0.455046	0.197187	Scaling	Scaling	Buffering	Buffering
NSUN6	0.0315267	0.398168	4.43909e-06	-0.764419	3.45117e-05	1.16259	sp.Q8TEA1.NSUN6_HUMAN	0.00675497	0.627688	0.00971568	-0.496882	0.000130581	1.12457	Scaling	Scaling	Scaling	Scaling
NT5C3A	1.83666e-05	0.885062	0.0559822	-0.729919	0.0017554	1.61498	sp.Q9H0P0.5NT3A_HUMAN	0.000458399	0.702867	0.116514	-0.322938	0.000587147	1.0258	Scaling	Scaling	Scaling	Scaling
NT5DC1	0.777057	-0.0767753	0.103657	-1.03452	0.14415	0.957745	sp.Q5TFE4.NT5D1_HUMAN	0.664752	0.253	0.0618876	-0.62477	0.213453	0.87777	Buffering	Scaling	Scaling	Scaling
NT5DC3	0.0285093	1.22229	0.414875	-0.249374	0.0159361	1.47167	sp.Q86UY8.NT5D3_HUMAN	0.168128	0.766507	0.638568	0.38663	0.671196	0.379876	Scaling	Buffering	Scaling	Anti-Scaling
NT5E	0.206385	-1.5017	0.825184	-0.265185	0.403017	-1.23652	sp.P21589.5NTD_HUMAN	0.354388	-0.596471	0.676398	-0.230074	0.621828	-0.366396	Anti-Scaling	Scaling	Anti-Scaling	Buffering
NTAN1	0.977134	-0.0167261	0.137959	-0.546762	0.434905	0.530036	sp.Q96AB6.NTAN1_HUMAN	0.457554	-0.551289	0.201876	-0.308532	0.733515	-0.242757	Buffering	Scaling	Anti-Scaling	Scaling
NTHL1	0.558278	0.212964	0.0366821	-0.561975	0.102476	0.774939	sp.P78549.NTHL1_HUMAN	0.624262	0.158342	0.291428	-0.269428	0.283445	0.42777	Buffering	Scaling	Buffering	Scaling
NTM	0.997033	0.00221103	0.500479	0.503496	0.577323	-0.501285	sp.Q9P121.4.NTRI_HUMAN	0.502684	-0.423289	0.652753	0.649375	0.481914	-1.07266	Buffering	Anti-Scaling	Anti-Scaling	Anti-Scaling
NTMT1	0.884313	-0.0267358	0.0792957	-0.465324	0.128745	0.438588	sp.Q9BV86.NTM1A_HUMAN	0.459907	-0.135384	0.930672	-0.0340861	0.806068	-0.101298	Buffering	Scaling	Anti-Scaling	Buffering
NUBP1	0.0657368	0.588727	0.0286557	-0.478753	0.00432612	1.06748	sp.P53384.NUBP1_HUMAN	0.471397	0.246259	0.678226	-0.206236	0.42496	0.452495	Scaling	Scaling	Buffering	Buffering
NUBP2	0.900759	0.017713	0.115633	-0.376723	0.135333	0.394436	sp.Q9Y5Y2.NUBP2_HUMAN	0.98666	-0.00511856	0.868469	-0.0492987	0.911009	0.0441801	Buffering	Scaling	Buffering	Buffering
NUBPL	0.0240406	0.878072	0.717009	-0.0747438	0.0170098	0.952815	sp.Q8TB37.NUBPL_HUMAN	0.127389	0.643316	0.89657	0.0227208	0.143475	0.620595	Scaling	Buffering	Scaling	Buffering
NUCB1	0.379519	0.298647	0.517408	-1.72358	0.457575	2.02222	sp.Q02818.NUCB1_HUMAN	0.586627	0.31886	0.323085	-0.784687	0.230246	1.10355	Scaling	Scaling	Scaling	Scaling
NUDCD3	5.38601e-05	0.616816	0.0203609	-1.09048	0.00312008	1.7073	sp.Q8IVD9.NUDC3_HUMAN	0.00818662	0.393066	0.0953611	-0.608685	0.021351	1.00175	Scaling	Scaling	Scaling	Scaling
NUDT1	0.0372145	0.352875	0.484133	-0.209094	0.112363	0.561969	sp.P36639.8ODP_HUMAN	0.51768	0.175074	0.0636712	0.665374	0.180068	-0.4903	Scaling	Buffering	Buffering	Anti-Scaling
NUDT14	0.506142	0.350766	0.0580938	-0.664741	0.108371	1.01551	sp.O95848.NUD14_HUMAN	0.224888	0.253911	0.238368	-0.460522	0.101651	0.714433	Scaling	Scaling	Scaling	Scaling
NUDT15	0.771962	-0.0917781	0.00190812	-0.722009	0.095367	0.630231	sp.Q9NV35.NUD15_HUMAN	0.477818	0.231808	0.260141	-0.518136	0.165497	0.749944	Buffering	Scaling	Buffering	Scaling
NUDT16L1	0.264526	-0.484324	0.105357	-0.486459	0.996044	0.00213566	sp.Q9BRJ7.SDOS_HUMAN	0.730369	-0.101696	0.302496	-0.262821	0.655054	0.161125	Anti-Scaling	Scaling	Anti-Scaling	Scaling
NUDT18	0.00254711	0.718279	0.411642	-0.158784	0.00215253	0.877063	sp.Q6ZVK8.NUD18_HUMAN	0.0548314	1.3137	4.583e-05	-0.549454	0.0165103	1.86315	Scaling	Buffering	Scaling	Scaling
NUDT19	0.863306	-0.129945	0.0376469	-0.594169	0.550281	0.464224	sp.A8MXV4.NUD19_HUMAN	0.375091	0.461834	0.0844071	-0.646068	0.0725231	1.1079	Anti-Scaling	Scaling	Scaling	Scaling
NUDT2	0.398845	0.305218	0.117865	-0.25545	0.166278	0.560668	sp.P50583.AP4A_HUMAN	0.557395	-0.138252	0.690545	-0.0859966	0.851786	-0.052255	Scaling	Scaling	Anti-Scaling	Buffering
NUDT21	0.474794	0.218251	0.00910152	-0.656254	0.0278301	0.874506	sp.O43809.CPSF5_HUMAN	0.642181	0.0683545	0.118605	-0.313585	0.100137	0.38194	Buffering	Scaling	Buffering	Scaling
NUDT22	0.00325421	0.430386	0.294825	0.173535	0.16612	0.256851	sp.Q9BRQ3.NUD22_HUMAN	0.00124642	-0.526578	0.739985	0.0764101	0.0233355	-0.602988	Scaling	Anti-Scaling	Anti-Scaling	Buffering
NUDT4	0.672038	0.2158	0.586684	-0.118448	0.529466	0.334248	sp.Q9NZJ9.NUDT4_HUMAN	0.944798	0.038376	0.895478	0.0293927	0.987467	0.00898332	Buffering	Buffering	Buffering	Buffering
NUDT5	0.0594624	0.542609	1.63069e-11	-0.995299	0.000905339	1.53791	sp.Q9UKK9.NUDT5_HUMAN	0.529983	0.140839	4.3671e-05	-0.941349	0.00130802	1.08219	Scaling	Scaling	Buffering	Scaling
NUDT8	0.377359	0.301749	0.764737	-0.108852	0.375702	0.410601	sp.Q8WV74.NUDT8_HUMAN	0.214677	0.557328	0.314842	-0.336326	0.0959387	0.893654	Scaling	Buffering	Scaling	Scaling
NUFIP1	0.948808	0.015721	0.00700976	-0.488673	0.0899577	0.504393	sp.Q9UHK0.NUFP1_HUMAN	0.841729	0.0394337	0.117745	-0.325008	0.162498	0.364442	Buffering	Scaling	Buffering	Scaling
NUMA1	0.369697	0.18708	0.754934	0.0735607	0.692692	0.113519	tr.H0YFY6.H0YFY6_HUMAN	0.618379	-0.284991	0.317142	-0.389321	0.872332	0.104331	Buffering	Buffering	Anti-Scaling	Scaling
NUMA1	0.369697	0.18708	0.754934	0.0735607	0.692692	0.113519	sp.Q14980.NUMA1_HUMAN	0.51403	0.293868	0.749935	-0.101601	0.458569	0.395469	Buffering	Buffering	Scaling	Buffering
NUMB	0.0247809	0.73533	0.582426	-0.208519	0.048314	0.94385	sp.P49757.NUMB_HUMAN	0.149516	0.253383	0.910887	-0.0304107	0.352452	0.283794	Scaling	Buffering	Scaling	Buffering
NUP107	0.00606265	0.701128	0.412325	-0.255579	0.0401358	0.956707	sp.P57740.NU107_HUMAN	0.516197	-0.0929034	0.544508	0.0542707	0.343852	-0.147174	Scaling	Scaling	Buffering	Buffering
NUP188	0.741257	-0.0364719	0.151787	-0.543059	0.176268	0.506588	sp.Q5SRE5.NU188_HUMAN	0.0454396	0.182756	0.900704	0.0208422	0.366073	0.161914	Buffering	Scaling	Buffering	Buffering
NUP214	0.222092	0.133902	0.0580831	-0.349225	0.0197314	0.483126	sp.P35658.3.NU214_HUMAN	0.105409	0.248517	0.71212	-0.083628	0.212768	0.332145	Buffering	Scaling	Buffering	Buffering
NUP214	0.222092	0.133902	0.0580831	-0.349225	0.0197314	0.483126	sp.P35658.5.NU214_HUMAN	0.0901643	0.315491	0.721666	-0.0550291	0.102821	0.37052	Buffering	Scaling	Scaling	Buffering
NUP37	0.0338098	0.860206	0.408851	-0.398139	0.0576986	1.25835	sp.Q8NFH4.NUP37_HUMAN	0.624462	0.133856	0.339541	-0.2676	0.271449	0.401456	Scaling	Scaling	Buffering	Scaling
NUP43	0.730541	0.164493	0.0221882	-0.610966	0.19051	0.775458	sp.Q8NFH3.NUP43_HUMAN	0.300445	-0.838165	0.938035	0.00909241	0.295838	-0.847258	Buffering	Scaling	Anti-Scaling	Buffering
NUP62	0.201499	0.346184	0.087727	-0.250598	0.052232	0.596782	sp.P37198.NUP62_HUMAN	0.967254	-0.01144	0.649026	-0.171689	0.715328	0.160249	Scaling	Scaling	Buffering	Buffering
NUP88	0.758089	-0.189457	0.00551489	-0.653331	0.483823	0.463874	sp.Q99567.NUP88_HUMAN	0.0965869	0.379763	0.759302	0.0288854	0.102566	0.350878	Anti-Scaling	Scaling	Scaling	Buffering
NUP93	0.7758	-0.0686569	0.000418397	-0.658703	0.0467792	0.590046	sp.Q8N1F7.NUP93_HUMAN	0.323136	0.0818762	0.00563439	-0.176634	0.00742521	0.25851	Buffering	Scaling	Buffering	Buffering
NUPL2	1.7328e-05	0.466547	0.000866287	-0.508583	2.10376e-06	0.97513	sp.O15504.NUPL2_HUMAN	0.558381	0.0723416	0.380831	-0.186841	0.255875	0.259183	Scaling	Scaling	Buffering	Buffering
NUS1	0.151811	0.235501	0.00839547	-0.604258	0.00267054	0.839759	sp.Q96E22.NGBR_HUMAN	0.437294	-1.07498	0.095566	-0.657923	0.749713	-0.417055	Buffering	Scaling	Anti-Scaling	Scaling
NUTF2	0.0656893	0.462493	0.0456066	-0.492579	0.00551976	0.955072	sp.P61970.NTF2_HUMAN	0.255027	0.257113	0.0504347	-0.446088	0.0198332	0.703201	Scaling	Scaling	Scaling	Scaling
NXF1	0.117287	-0.27274	0.282811	-0.205594	0.763661	-0.0671459	sp.Q9UBU9.NXF1_HUMAN	0.512447	-0.108261	0.019047	-0.304782	0.298498	0.196522	Anti-Scaling	Buffering	Anti-Scaling	Scaling
NXN	0.625487	0.756136	0.00785836	-1.46392	0.227462	2.22006	sp.Q6DKJ4.NXN_HUMAN	0.511968	0.783506	0.0477287	-0.793769	0.246043	1.57728	Scaling	Scaling	Scaling	Scaling
NXT1	0.0379881	0.469055	0.0344497	-0.437688	0.00251821	0.906742	sp.Q9UKK6.NXT1_HUMAN	0.412252	0.273227	0.736621	-0.0774734	0.33702	0.350701	Scaling	Scaling	Scaling	Buffering
OAS2	0.0531231	-1.03312	0.0924076	-0.884164	0.774252	-0.148953	sp.P29728.OAS2_HUMAN	0.208945	-0.433196	0.863945	-0.0813237	0.509512	-0.351872	Anti-Scaling	Scaling	Anti-Scaling	Buffering
OAS3	0.856783	-0.203882	0.43254	-1.00547	0.606327	0.801589	sp.Q9Y6K5.OAS3_HUMAN	0.985329	-0.0149541	0.942923	0.0149219	0.970916	-0.029876	Anti-Scaling	Scaling	Buffering	Buffering
OASL	0.477381	0.411841	0.794749	-0.110849	0.430406	0.522691	sp.Q15646.OASL_HUMAN	0.844666	0.183381	0.819184	0.130911	0.959262	0.0524704	Scaling	Buffering	Buffering	Anti-Scaling
ODF2	0.82907	0.0339478	0.000817971	-0.443665	0.0174462	0.477613	sp.Q5BJF6.ODFP2_HUMAN	0.726205	-0.103758	0.158365	-0.345096	0.488598	0.241338	Buffering	Scaling	Anti-Scaling	Scaling
OGDH	0.000385227	0.576742	0.0165256	-0.928299	0.00195559	1.50504	sp.Q02218.3.ODO1_HUMAN	0.0305399	0.355626	0.0732916	-0.95557	0.0275566	1.3112	Scaling	Scaling	Scaling	Scaling
OGDH	0.000385227	0.576742	0.0165256	-0.928299	0.00195559	1.50504	tr.E9PCR7.E9PCR7_HUMAN	0.0231836	0.391301	0.0379947	-1.12889	0.0123235	1.52019	Scaling	Scaling	Scaling	Scaling
OGFOD1	0.386033	0.142353	0.000316755	-0.72966	0.000776291	0.872012	sp.Q8N543.OGFD1_HUMAN	0.0625164	0.425341	0.280995	-0.189836	0.0216644	0.615177	Buffering	Scaling	Scaling	Buffering
OGFOD2	0.0361679	0.361752	0.842347	-0.0705803	0.296507	0.432332	sp.Q6N063.OGFD2_HUMAN	0.463946	0.124098	0.769475	0.14932	0.960411	-0.0252222	Scaling	Buffering	Buffering	Anti-Scaling
OPTN	0.661138	0.510863	0.71717	0.136774	0.750735	0.374089	sp.Q96CV9.OPTN_HUMAN	0.203936	0.861484	0.446414	-0.209579	0.135254	1.07106	Scaling	Anti-Scaling	Scaling	Buffering
ORC3	0.896016	-0.0429842	0.156624	-0.387368	0.398684	0.344384	sp.Q9UBD5.2.ORC3_HUMAN	0.329195	0.394601	0.512412	-0.118446	0.233188	0.513047	Buffering	Scaling	Scaling	Buffering
ORC6	0.815956	-0.08191	0.00770566	-0.612107	0.188466	0.530197	sp.Q9Y5N6.ORC6_HUMAN	0.784485	-0.0774395	0.114828	-0.326423	0.429771	0.248983	Buffering	Scaling	Buffering	Scaling
ORMDL2	0.0149856	1.1647	0.771301	-0.209799	0.147567	1.3745	sp.Q53FV1.ORML2_HUMAN	0.840358	-0.0507985	0.64722	0.229464	0.600924	-0.280263	Scaling	Buffering	Buffering	Anti-Scaling
OS9	0.841378	0.107811	0.169873	1.55719	0.185892	-1.44938	sp.Q13438.OS9_HUMAN	0.0411588	0.792326	0.0668433	0.99746	0.611555	-0.205134	Buffering	Anti-Scaling	Scaling	Anti-Scaling
OSBP	0.126545	0.221265	0.289644	-0.145712	0.0447805	0.366977	sp.P22059.OSBP1_HUMAN	0.455514	0.163619	0.885456	-0.0261459	0.472531	0.189764	Buffering	Buffering	Buffering	Buffering
OSBPL3	7.87417e-10	1.80543	0.866076	0.0802121	0.016893	1.72521	sp.Q9H4L5.OSBL3_HUMAN	1.35563e-08	1.10089	0.585587	-0.253164	0.0392544	1.35405	Scaling	Buffering	Scaling	Scaling
OSBPL8	0.675366	0.143883	0.304976	0.168179	0.944873	-0.024296	sp.Q9BZF1.OSBL8_HUMAN	0.146302	0.254494	0.958014	0.0090059	0.26485	0.245488	Buffering	Anti-Scaling	Scaling	Buffering
OSGEP	0.97906	-0.00707978	0.0093476	-1.04516	0.0195737	1.03808	sp.Q9NPF4.OSGEP_HUMAN	0.0205956	0.362206	0.00442081	-0.812046	0.000464564	1.17425	Buffering	Scaling	Scaling	Scaling
OSTF1	0.000201312	1.04769	0.771721	-0.0646736	0.00173972	1.11236	sp.Q92882.OSTF1_HUMAN	0.238099	0.169664	0.591457	-0.227495	0.353155	0.39716	Scaling	Buffering	Buffering	Buffering
OSTM1	0.353672	-0.400121	0.204139	-0.680667	0.641368	0.280546	sp.Q86WC4.OSTM1_HUMAN	0.134105	-0.30229	0.957429	-0.0166804	0.396718	-0.285609	Anti-Scaling	Scaling	Anti-Scaling	Buffering
OTUB1	0.18004	0.173401	0.22105	0.144595	0.849749	0.0288064	sp.Q96FW1.OTUB1_HUMAN	0.321451	0.250665	0.484455	0.141396	0.707948	0.109268	Buffering	Anti-Scaling	Scaling	Anti-Scaling
OTX1	0.101202	1.20733	0.0122617	-0.701466	0.0297584	1.9088	sp.P32242.OTX1_HUMAN	0.361214	0.784403	0.167163	-0.649571	0.15084	1.43397	Scaling	Scaling	Scaling	Scaling
OTX2	0.0197738	-0.351074	0.0308575	-0.328756	0.411735	-0.0223179	sp.P32243.2.OTX2_HUMAN	0.942337	0.0336901	0.381254	-2.06965	0.372581	2.10334	Anti-Scaling	Scaling	Buffering	Scaling
OVCA2	0.222524	0.577749	0.000531261	-1.00318	0.0192273	1.58093	sp.Q8WZ82.OVCA2_HUMAN	0.312799	0.396528	0.0080993	-0.786497	0.0274282	1.18302	Scaling	Scaling	Scaling	Scaling
OXA1L	0.00249222	0.464262	0.0140662	-0.721731	0.00092637	1.18599	sp.Q15070.OXA1L_HUMAN	0.599783	0.140179	0.702813	-0.0742847	0.488897	0.214464	Scaling	Scaling	Buffering	Buffering
PA2G4	0.0436583	0.440996	0.455285	-0.217969	0.0862074	0.658965	sp.Q9UQ80.PA2G4_HUMAN	0.239973	0.236292	0.0308164	-0.386806	0.02288	0.623099	Scaling	Buffering	Buffering	Scaling
PAAF1	0.0689301	0.501714	0.320462	-0.346999	0.0500494	0.848713	sp.Q9BRP4.PAAF1_HUMAN	0.295263	0.479026	0.232171	0.25622	0.634474	0.222805	Scaling	Scaling	Scaling	Anti-Scaling
PABPN1	0.17662	0.531033	0.00704084	-0.827482	0.00917963	1.35851	sp.Q86U42.PABP2_HUMAN	0.218967	0.168913	0.00176904	-0.647974	0.000845744	0.816887	Scaling	Scaling	Buffering	Scaling
PACS1	0.533517	0.157657	0.0419343	0.602707	0.195475	-0.445049	sp.Q6VY07.PACS1_HUMAN	0.261868	0.257236	0.188818	0.345005	0.779568	-0.0877687	Buffering	Anti-Scaling	Scaling	Anti-Scaling
PACS2	0.113131	0.547593	0.0615128	-0.865519	0.0124507	1.41311	sp.Q86VP3.3.PACS2_HUMAN	0.817751	-0.0561945	0.119758	-0.344024	0.339105	0.287829	Scaling	Scaling	Buffering	Scaling
PAF1	0.066386	0.516474	0.861533	0.0718294	0.359313	0.444644	sp.Q8N7H5.PAF1_HUMAN	0.600015	0.158266	0.0556093	-0.190758	0.269689	0.349025	Scaling	Buffering	Buffering	Buffering
PAFAH1B1	0.913847	0.0312314	0.000120889	-0.973949	0.0301565	1.00518	sp.P43034.LIS1_HUMAN	0.587851	0.27816	0.271188	-0.167112	0.414849	0.445272	Buffering	Scaling	Scaling	Buffering
PAFAH1B2	0.861773	0.0356269	0.00403436	-0.595738	0.0230274	0.631365	sp.P68402.PA1B2_HUMAN	0.211227	0.527561	0.223477	-0.416141	0.0736824	0.943703	Buffering	Scaling	Scaling	Scaling
PAFAH1B3	0.339589	0.309152	0.467103	-0.376181	0.24976	0.685333	sp.Q15102.PA1B3_HUMAN	0.679802	0.106503	0.565851	0.113003	0.982021	-0.00649971	Scaling	Scaling	Buffering	Anti-Scaling
PAGR1	0.43185	-0.350772	0.0127408	-0.545605	0.656544	0.194832	sp.Q9BTK6.PAGR1_HUMAN	0.0125706	0.271672	0.859184	0.0360733	0.252939	0.235599	Anti-Scaling	Scaling	Scaling	Buffering
PAK1	0.564482	-0.24714	0.736528	-0.102222	0.769272	-0.144917	sp.Q13153.PAK1_HUMAN	0.479118	-0.23682	0.47876	-0.168927	0.8567	-0.0678931	Anti-Scaling	Buffering	Anti-Scaling	Buffering
PAK4	0.396317	0.40058	0.64172	-0.388491	0.403308	0.789071	sp.O96013.PAK4_HUMAN	0.910545	0.0366894	0.765088	-0.123088	0.747616	0.159778	Scaling	Scaling	Buffering	Buffering
PALM	0.844886	-0.245607	0.0432136	0.857922	0.421509	-1.10353	sp.O75781.PALM_HUMAN	0.608781	0.684947	0.0688293	1.33038	0.636906	-0.645432	Anti-Scaling	Anti-Scaling	Scaling	Anti-Scaling
PALM2	0.653134	0.0949601	0.796112	0.0420649	0.833947	0.0528952	sp.Q8IXS6.2.PALM2_HUMAN	0.267189	0.800841	0.182372	0.566935	0.743761	0.233906	Buffering	Buffering	Scaling	Anti-Scaling
PAN3	0.0913792	1.37164	0.943482	0.0446599	0.169056	1.32698	sp.Q58A45.PAN3_HUMAN	0.0683694	1.03976	0.876165	0.0627892	0.129832	0.976973	Scaling	Buffering	Scaling	Buffering
PANK2	0.00205993	0.392704	0.027216	-0.573748	0.00139136	0.966451	sp.Q9BZ23.PANK2_HUMAN	0.074967	0.361489	0.35659	-0.260274	0.0632507	0.621763	Scaling	Scaling	Scaling	Scaling
PANX1	0.646731	-0.239837	0.0869684	-0.30269	0.905345	0.062852	sp.Q96RD7.PANX1_HUMAN	0.201007	0.684892	0.739586	-0.0637829	0.173502	0.748675	Anti-Scaling	Scaling	Scaling	Buffering
PAPOLA	0.107708	0.486897	0.0308104	-0.502495	0.00998873	0.989392	sp.P51003.PAPOA_HUMAN	0.651845	0.165165	0.0595042	-0.486208	0.143824	0.651373	Scaling	Scaling	Buffering	Scaling
PAPOLG	0.461678	0.261079	0.0104282	-0.627745	0.0565052	0.888824	sp.Q9BWT3.PAPOG_HUMAN	0.268296	0.310104	0.551281	-0.175261	0.207105	0.485365	Scaling	Scaling	Scaling	Buffering
PARD3	0.118874	0.485068	0.0627192	-0.832738	0.00691015	1.31781	sp.Q8TEW0.PARD3_HUMAN	0.217068	0.336992	0.0327493	-0.626884	0.0108445	0.963876	Scaling	Scaling	Scaling	Scaling
PARN	0.503161	0.130929	0.00529767	-0.676967	0.0115416	0.807896	sp.O95453.PARN_HUMAN	0.000948797	0.537143	0.0144919	-0.445937	0.000124737	0.98308	Buffering	Scaling	Scaling	Scaling
PARP2	0.00184406	0.527115	0.00141954	-0.903676	5.66941e-05	1.43079	sp.Q9UGN5.2.PARP2_HUMAN	0.141206	0.503325	0.00474523	-0.499687	0.0173233	1.00301	Scaling	Scaling	Scaling	Scaling
PARP4	0.00941231	0.721157	0.185121	-0.2155	0.00225944	0.936657	sp.Q9UKK3.PARP4_HUMAN	0.748697	0.148444	0.98276	0.00732704	0.795457	0.141117	Scaling	Buffering	Buffering	Buffering
PATL1	0.735806	-0.0449094	0.482635	0.13527	0.407773	-0.180179	sp.Q86TB9.PATL1_HUMAN	0.120608	0.190973	0.283435	0.1986	0.96875	-0.00762712	Buffering	Anti-Scaling	Buffering	Anti-Scaling
PAWR	0.00387962	0.973726	0.718552	-0.721869	0.431909	1.69559	sp.Q96IZ0.PAWR_HUMAN	0.0781157	0.444814	0.732619	-0.425902	0.506092	0.870716	Scaling	Scaling	Scaling	Scaling
PAX1	0.0225752	-0.111273	0.0208996	-0.112709	0.343436	0.00143553	sp.P15863.PAX1_HUMAN	0.376711	-2.25359	0.30087	-0.786948	0.562558	-1.46664	Anti-Scaling	Buffering	Anti-Scaling	Scaling
PBK	0.797956	-0.139636	0.0739579	-0.506838	0.533617	0.367202	sp.Q96KB5.TOPK_HUMAN	0.704104	0.163463	0.870432	-0.0547097	0.669447	0.218172	Anti-Scaling	Scaling	Buffering	Buffering
PBX3	0.724987	0.210924	0.982526	0.00707623	0.749554	0.203847	sp.P40426.PBX3_HUMAN	0.86522	-0.0588139	0.372322	-0.287978	0.600045	0.229165	Buffering	Buffering	Buffering	Scaling
PC	0.944334	-0.045037	0.680979	-0.168568	0.866237	0.123531	sp.P11498.PYC_HUMAN	0.954818	-0.0303643	0.706806	-0.14784	0.853057	0.117476	Buffering	Buffering	Buffering	Buffering
PCBP1	0.00339016	0.332209	0.663475	-0.102465	0.127587	0.434673	sp.Q15365.PCBP1_HUMAN	0.987987	0.00373134	0.886568	-0.0488621	0.895068	0.0525934	Scaling	Buffering	Buffering	Buffering
PCBP2	0.323919	0.217133	0.449504	0.406204	0.718129	-0.189072	sp.Q15366.PCBP2_HUMAN	0.648296	-0.0772379	0.749733	0.0801561	0.581928	-0.157394	Buffering	Anti-Scaling	Buffering	Buffering
PCBP2	0.323919	0.217133	0.449504	0.406204	0.718129	-0.189072	tr.F8VRH0.F8VRH0_HUMAN	0.803823	0.0747137	0.569387	-0.222852	0.513583	0.297565	Buffering	Anti-Scaling	Buffering	Buffering
PCCA	0.663884	0.363688	0.0442251	-0.797175	0.21125	1.16086	sp.P05165.PCCA_HUMAN	0.253413	0.557679	0.036114	-0.63642	0.0388927	1.1941	Scaling	Scaling	Scaling	Scaling
PCF11	0.0303109	0.356367	0.279064	-0.270827	0.0336994	0.627194	sp.O94913.PCF11_HUMAN	0.108489	0.297726	0.312684	-0.304173	0.0829235	0.601898	Scaling	Scaling	Scaling	Scaling
PCID2	0.0944957	0.394402	0.0122325	-0.599309	0.00272817	0.993711	sp.Q5JVF3.PCID2_HUMAN	0.471647	0.156778	0.135431	-0.275003	0.120258	0.431781	Scaling	Scaling	Buffering	Scaling
PCK2	0.657215	0.339621	0.00032752	-1.54157	0.0518885	1.88119	sp.Q16822.PCKGM_HUMAN	0.00661518	0.983431	0.00141156	-1.24636	4.83659e-05	2.22979	Scaling	Scaling	Scaling	Scaling
PCM1	0.0266314	0.539817	0.000107046	-0.822858	2.35913e-05	1.36267	sp.Q15154.2.PCM1_HUMAN	0.892952	-0.028769	0.0337658	-0.420638	0.14492	0.391869	Scaling	Scaling	Buffering	Scaling
PCM1	0.0266314	0.539817	0.000107046	-0.822858	2.35913e-05	1.36267	tr.E7ETA6.E7ETA6_HUMAN	0.905727	0.0426492	0.00268547	-0.627942	0.065623	0.670592	Scaling	Scaling	Buffering	Scaling
PCMT1	0.444044	0.210183	0.0469716	-0.667102	0.038844	0.877285	sp.P22061.2.PIMT_HUMAN	0.992196	-0.00901539	0.582984	0.124696	0.886582	-0.133711	Buffering	Scaling	Buffering	Anti-Scaling
PCNA	0.571894	0.183066	0.0117105	-0.657776	0.035701	0.840842	sp.P12004.PCNA_HUMAN	0.550689	-0.138934	0.0646743	-0.404292	0.36506	0.265358	Buffering	Scaling	Anti-Scaling	Scaling
PCYOX1	0.00601519	1.33401	0.917286	0.0756621	0.154381	1.25835	sp.Q9UHG3.PCYOX_HUMAN	0.00253377	0.952724	0.757963	0.183693	0.252493	0.76903	Scaling	Buffering	Scaling	Anti-Scaling
PDCD2	0.635298	0.175619	0.0154062	-0.524718	0.138535	0.700337	sp.Q16342.PDCD2_HUMAN	0.936253	0.0294547	0.372918	-0.217534	0.55997	0.246988	Buffering	Scaling	Buffering	Buffering
PDCD2L	0.0483684	0.586443	0.569026	0.179699	0.294158	0.406744	sp.Q9BRP1.PDD2L_HUMAN	0.849224	-0.0718191	0.177793	0.786663	0.161754	-0.858482	Scaling	Anti-Scaling	Buffering	Anti-Scaling
PDCD5	0.0368928	0.80116	0.762107	-0.208034	0.227425	1.00919	sp.O14737.PDCD5_HUMAN	0.565558	-0.133777	0.651149	0.408785	0.560812	-0.542562	Scaling	Buffering	Anti-Scaling	Anti-Scaling
PDCL	0.190454	0.132575	0.698179	-0.060167	0.266537	0.192742	sp.Q13371.PHLP_HUMAN	0.958748	-0.0131267	0.650127	0.267169	0.652936	-0.280296	Buffering	Buffering	Buffering	Anti-Scaling
PDE2A	0.137381	0.833178	0.990737	0.0038785	0.173663	0.8293	sp.O00408.PDE2A_HUMAN	0.177124	-0.371602	0.814252	0.128097	0.391914	-0.499699	Scaling	Buffering	Anti-Scaling	Anti-Scaling
PDF	0.00906338	0.994534	0.00325195	-0.847421	0.000154724	1.84195	sp.Q9HBH1.DEFM_HUMAN	0.0527142	0.804669	0.0366902	-0.853412	0.00367331	1.65808	Scaling	Scaling	Scaling	Scaling
PDIA6	0.0679343	0.468991	0.947201	-0.0190168	0.175319	0.488008	tr.B5MCQ5.B5MCQ5_HUMAN	0.0256836	0.544086	0.932175	0.025461	0.157363	0.518625	Scaling	Buffering	Scaling	Buffering
PDLIM2	0.418424	-0.367225	0.122535	-0.739317	0.51289	0.372092	sp.Q96JY6.5.PDLI2_HUMAN	0.508723	0.262673	0.918415	-0.037741	0.545409	0.300414	Anti-Scaling	Scaling	Scaling	Buffering
PDP2	0.652698	0.151557	0.0778712	-0.593635	0.10439	0.745191	sp.Q9P2J9.PDP2_HUMAN	0.78703	0.0578003	0.745162	-0.123602	0.654443	0.181402	Buffering	Scaling	Buffering	Buffering
PDPK1	0.639596	0.284613	0.159498	-0.558916	0.250323	0.84353	sp.O15530.PDPK1_HUMAN	0.994523	-0.00486234	0.392833	-0.133069	0.858419	0.128206	Scaling	Scaling	Buffering	Buffering
PDPR	0.899134	0.0247427	0.00928286	-1.0581	0.00997386	1.08284	sp.Q8NCN5.PDPR_HUMAN	0.0489198	0.68708	0.00800546	-0.507188	0.00444664	1.19427	Buffering	Scaling	Scaling	Scaling
PDS5B	0.019434	0.333232	0.0709498	-0.434594	0.00456692	0.767826	sp.Q9NTI5.PDS5B_HUMAN	0.037722	0.670076	0.621286	-0.086568	0.0282956	0.756644	Scaling	Scaling	Scaling	Buffering
PDSS1	0.106116	0.481585	0.00036951	-1.10664	0.000371396	1.58823	sp.Q5T2R2.DPS1_HUMAN	0.0586529	0.486244	0.373504	-0.229332	0.0261097	0.715576	Scaling	Scaling	Scaling	Buffering
PDSS2	0.354622	0.415871	0.0248436	-0.655003	0.0636728	1.07087	sp.Q86YH6.DLP1_HUMAN	0.0345121	1.04571	0.13464	-0.614414	0.00358385	1.66012	Scaling	Scaling	Scaling	Scaling
PDXDC1	0.409738	0.296704	0.00828723	-0.65624	0.05158	0.952943	sp.Q6P996.PDXD1_HUMAN	0.835308	-0.101644	0.0420198	-0.442524	0.519265	0.340881	Scaling	Scaling	Anti-Scaling	Scaling
PEBP1	0.510012	0.30367	0.314971	-1.09701	0.226157	1.40069	sp.P30086.PEBP1_HUMAN	0.827403	0.0473306	0.238027	-0.736039	0.215694	0.78337	Scaling	Scaling	Buffering	Scaling
PELI3	0.599167	-0.099108	0.522605	-0.169776	0.813119	0.070668	sp.Q8N2H9.PELI3_HUMAN	0.656859	-0.324723	0.974149	-0.029032	0.786707	-0.295691	Buffering	Buffering	Anti-Scaling	Buffering
PELP1	0.646354	-0.172689	0.00356523	-0.644859	0.277703	0.47217	sp.Q8IZL8.2.PELP1_HUMAN	0.734487	0.107217	0.000848552	-0.449066	0.167981	0.556283	Anti-Scaling	Scaling	Buffering	Scaling
PEPD	0.372695	0.242216	0.974105	-0.0343091	0.798403	0.276526	sp.P12955.PEPD_HUMAN	0.682192	0.0960312	0.329157	0.566097	0.410205	-0.470066	Buffering	Buffering	Buffering	Anti-Scaling
PER1	0.539278	0.447347	0.0187072	-0.594987	0.221192	1.04233	sp.O15534.PER1_HUMAN	0.437366	0.40532	0.241534	-0.593572	0.148449	0.998892	Scaling	Scaling	Scaling	Scaling
PET100	0.156416	0.422292	0.793098	-0.0762029	0.197445	0.498495	sp.P0DJ07.PT100_HUMAN	0.117116	0.565511	0.555465	0.263094	0.533562	0.302416	Scaling	Buffering	Scaling	Anti-Scaling
PET117	0.0746013	0.470139	0.0464414	-0.418276	0.00727705	0.888416	sp.Q6UWS5.PT117_HUMAN	0.00348829	0.822123	0.435727	-0.211643	0.00406991	1.03377	Scaling	Scaling	Scaling	Buffering
PEX3	0.990076	-0.00477433	0.0379152	-0.765188	0.148066	0.760414	sp.P56589.PEX3_HUMAN	0.803016	0.150164	0.213377	-0.320165	0.476775	0.470329	Buffering	Scaling	Buffering	Scaling
PEX5	0.000637135	0.793981	2.72604e-10	-0.908461	4.8347e-07	1.70244	tr.B4E0T2.B4E0T2_HUMAN	0.0175575	0.421913	0.407422	-0.25826	0.0852171	0.680173	Scaling	Scaling	Scaling	Scaling
PFAS	0.426601	-0.624486	0.0559563	-0.470681	0.834755	-0.153806	sp.O15067.PUR4_HUMAN	0.57462	-0.255772	0.387752	-0.185272	0.878529	-0.0704998	Anti-Scaling	Scaling	Anti-Scaling	Buffering
PFDN5	0.024239	0.346305	0.194969	-0.31297	0.0365104	0.659275	sp.Q99471.PFD5_HUMAN	0.0125696	-0.54594	0.665749	-0.165489	0.366726	-0.380451	Scaling	Scaling	Anti-Scaling	Buffering
PFKFB3	0.179253	-0.322893	0.8031	0.0900575	0.30166	-0.41295	sp.Q16875.F263_HUMAN	0.335706	0.460276	0.99847	0.000294793	0.342735	0.459981	Anti-Scaling	Buffering	Scaling	Buffering
PFKM	0.31984	0.525676	0.218278	-0.695561	0.0951679	1.22124	sp.P08237.3.K6PF_HUMAN	0.342513	-0.257679	0.430098	-0.213185	0.890286	-0.0444943	Scaling	Scaling	Anti-Scaling	Buffering
PFKP	0.788209	-0.130126	0.0948317	-0.802567	0.291595	0.672441	sp.Q01813.K6PP_HUMAN	0.629684	0.125594	0.108648	-0.307779	0.13994	0.433373	Anti-Scaling	Scaling	Buffering	Scaling
PFN1	0.956362	-0.0282949	0.000553589	-0.863862	0.198567	0.835567	sp.P07737.PROF1_HUMAN	0.664825	-0.157999	0.587114	-0.143605	0.971792	-0.0143942	Buffering	Scaling	Anti-Scaling	Buffering
PGAM5	0.0195535	0.907947	0.183488	-0.266873	0.00676099	1.17482	sp.Q96HS1.PGAM5_HUMAN	0.0189317	1.1431	0.196894	-0.312054	0.00606174	1.45516	Scaling	Scaling	Scaling	Scaling
PGLS	0.110854	1.24049	0.353075	-0.402134	0.0494622	1.64263	sp.O95336.6PGL_HUMAN	0.285745	0.879108	0.955132	0.028686	0.329368	0.850422	Scaling	Scaling	Scaling	Buffering
PGM2L1	0.347706	-0.352973	0.996733	0.00133657	0.438702	-0.35431	sp.Q6PCE3.PGM2L_HUMAN	0.715925	-0.102877	0.0778171	-0.418988	0.318042	0.316111	Anti-Scaling	Buffering	Anti-Scaling	Scaling
PGM3	0.795207	0.213213	0.104947	-0.611098	0.374844	0.824311	sp.O95394.4.AGM1_HUMAN	0.855796	0.131517	0.397517	-0.209612	0.653332	0.341128	Buffering	Scaling	Buffering	Buffering
PGM5	0.41342	0.549274	0.646238	0.156274	0.583333	0.393	sp.Q15124.PGM5_HUMAN	0.385136	0.602248	0.42087	0.454551	0.849984	0.147697	Scaling	Anti-Scaling	Scaling	Anti-Scaling
PGP	0.307855	-0.39478	0.0112639	-0.709655	0.428128	0.314874	sp.A6NDG6.PGP_HUMAN	0.432431	-0.0897644	0.205565	-0.278177	0.372076	0.188413	Anti-Scaling	Scaling	Buffering	Scaling
PHACTR2	0.575262	0.794792	0.154188	-0.831071	0.306136	1.62586	tr.J3KP75.J3KP75_HUMAN	0.639066	0.385894	0.231554	-0.35907	0.40284	0.744964	Scaling	Scaling	Scaling	Scaling
PHB2	6.54284e-05	0.674185	0.191148	-0.492674	0.0280112	1.16686	sp.Q99623.PHB2_HUMAN	0.222032	0.163066	0.145854	-0.386055	0.0580498	0.549122	Scaling	Scaling	Buffering	Scaling
PHF10	0.0120488	1.21516	0.197399	-0.551909	0.00255104	1.76707	sp.Q8WUB8.PHF10_HUMAN	0.78655	0.159446	0.860372	-0.0364833	0.74726	0.195929	Scaling	Scaling	Buffering	Buffering
PHF14	0.00266859	0.471278	0.00830768	-0.65458	0.000194074	1.12586	sp.O94880.PHF14_HUMAN	0.264589	0.112695	0.352075	-0.202764	0.182645	0.315459	Scaling	Scaling	Buffering	Buffering
PHF2	0.0449859	0.492725	0.222692	-0.228521	0.0142857	0.721246	sp.O75151.PHF2_HUMAN	0.00383795	0.801753	0.911439	-0.0358084	0.0463197	0.837562	Scaling	Buffering	Scaling	Buffering
PHF23	0.322317	0.41645	0.00509007	-0.702292	0.0461175	1.11874	tr.B4DLK6.B4DLK6_HUMAN	0.206697	0.359506	0.122045	-0.381093	0.0396106	0.740599	Scaling	Scaling	Scaling	Scaling
PHF23	0.322317	0.41645	0.00509007	-0.702292	0.0461175	1.11874	sp.Q9BUL5.2.PHF23_HUMAN	0.984582	-0.0091593	0.0754403	-0.558692	0.33217	0.549533	Scaling	Scaling	Buffering	Scaling
PHF3	0.0342854	0.214306	0.121911	-0.211981	0.00945393	0.426287	sp.Q92576.2.PHF3_HUMAN	0.409546	-0.401286	0.623242	-0.0984347	0.531512	-0.302851	Buffering	Buffering	Anti-Scaling	Buffering
PHIP	0.789321	0.182807	0.138382	-0.370985	0.457651	0.553791	sp.Q8WWQ0.PHIP_HUMAN	0.162726	0.266039	0.330684	-0.257082	0.0872473	0.523121	Buffering	Scaling	Scaling	Scaling
PHKB	0.0515849	0.508206	0.316096	-0.306813	0.0357545	0.815019	sp.Q93100.3.KPBB_HUMAN	0.0718389	0.49603	0.920664	0.0251284	0.163504	0.470902	Scaling	Scaling	Scaling	Buffering
PHLDA1	0.334614	-0.806143	0.827468	0.311614	0.485344	-1.11776	sp.Q8WV24.PHLA1_HUMAN	0.323026	-1.16717	0.721139	0.631528	0.380996	-1.7987	Anti-Scaling	Anti-Scaling	Anti-Scaling	Anti-Scaling
PHLDB1	0.681788	-0.467451	0.513537	0.430625	0.482009	-0.898076	sp.Q86UU1.2.PHLB1_HUMAN	0.878809	0.0744147	0.715	-0.119179	0.728811	0.193594	Anti-Scaling	Anti-Scaling	Buffering	Buffering
[truncated: 1,278 more rows]

## Sheet: Difference High Aneuploidy
Gene_Symbol	RNA.Pvalue.Gain	RNA.Difference.Gain	RNA.Pvalue.Loss	RNA.Difference.Loss	RNA.Pvalue.Gain vs Loss	RNA.Difference Gain vs Loss	Protein_ID	Protein.Pvalue.Gain	Protein.Difference.Gain	Protein.Pvalue.Loss	Protein.Diff.Loss	Protein.Pvalue.Gain vs Loss	Protein.Difference.Gain vs Loss	RNA.Gain.Difference.Category	RNA.Loss.Difference.Category	Protein.Gain.Difference.Category	Protein.Loss.Difference.Category
A2ML1	0.0302271	-0.325657	0.517059	-0.120768	0.107492	-0.204889	sp.A8K2U0.A2ML1_HUMAN	0.0675767	-1.26253	0.0407035	-1.25321	0.98083	-0.00932112	Anti-Scaling	Buffering	Anti-Scaling	Scaling
AAAS	0.783905	0.0496374	7.00369e-05	-0.38918	0.0339182	0.438817	sp.Q9NRG9.AAAS_HUMAN	0.229726	-0.160465	0.907938	0.0108986	0.230432	-0.171364	Buffering	Scaling	Anti-Scaling	Buffering
AACS	0.550565	0.141928	0.665582	-0.0677767	0.418942	0.209705	sp.Q86V21.AACS_HUMAN	0.141862	0.507297	0.833177	0.0331598	0.175046	0.474138	Buffering	Buffering	Scaling	Buffering
AAGAB	0.072115	0.349618	0.117962	-0.155537	0.0177031	0.505155	sp.Q6PD74.AAGAB_HUMAN	0.000728131	0.939021	0.775383	-0.0658784	0.000132349	1.0049	Scaling	Buffering	Scaling	Buffering
AAK1	0.112759	0.38058	0.453915	-0.116772	0.051954	0.497353	sp.Q2M2I8.AAK1_HUMAN	0.0424248	0.393918	0.103351	-0.314916	0.00389701	0.708833	Scaling	Buffering	Scaling	Scaling
AAMDC	0.186713	0.329941	0.111633	-0.360195	0.019004	0.690137	sp.Q9H7C9.AAMDC_HUMAN	0.147476	0.345071	0.869756	0.0372878	0.255365	0.307783	Scaling	Scaling	Scaling	Buffering
AAMP	0.184318	0.382297	0.0997369	-0.152949	0.0861588	0.535245	sp.Q13685.AAMP_HUMAN	0.315263	0.369746	0.662571	-0.0738235	0.253487	0.44357	Scaling	Buffering	Scaling	Buffering
AAR2	0.00163623	0.304559	0.332248	-0.214339	0.0318189	0.518899	sp.Q9Y312.AAR2_HUMAN	0.842422	0.0192611	0.539851	-0.0965979	0.468136	0.115859	Scaling	Buffering	Buffering	Buffering
AARS	0.114613	0.429655	0.0640159	-0.237759	0.0332881	0.667414	sp.P49588.SYAC_HUMAN	0.00457812	0.714762	0.0055551	-0.413087	0.000525307	1.12785	Scaling	Buffering	Scaling	Scaling
AARS2	0.319609	0.1779	0.0398895	-0.280469	0.0295698	0.458369	sp.Q5JTZ9.SYAM_HUMAN	0.279618	0.143578	0.0401004	-0.217676	0.0103146	0.361253	Buffering	Scaling	Buffering	Buffering
AARSD1	0.84205	0.0280767	0.0573176	-0.271861	0.0605239	0.299938	sp.Q9BTE6.3.AASD1_HUMAN	0.302347	0.187377	0.306447	-0.174571	0.0799965	0.361948	Buffering	Scaling	Buffering	Buffering
AARSD1	0.84205	0.0280767	0.0573176	-0.271861	0.0605239	0.299938	sp.Q9BTE6.AASD1_HUMAN	0.00849086	0.635884	0.741261	-0.0760712	0.010663	0.711956	Buffering	Scaling	Scaling	Buffering
AASDHPPT	0.00763143	0.441576	0.169356	-0.15594	0.00080006	0.597516	sp.Q9NRN7.ADPPT_HUMAN	0.0170089	0.439958	0.388017	-0.127413	0.00397851	0.567371	Scaling	Buffering	Scaling	Buffering
AASS	0.206523	0.421133	0.396572	0.292862	0.745579	0.128271	sp.Q9UDR5.AASS_HUMAN	0.303468	0.259008	0.194904	0.357931	0.719777	-0.0989232	Scaling	Anti-Scaling	Scaling	Anti-Scaling
AATF	0.480534	0.126873	0.0110479	-0.346696	0.0132655	0.473569	sp.Q9NY61.AATF_HUMAN	0.415634	-0.129641	0.179112	-0.19014	0.74469	0.0604997	Buffering	Scaling	Anti-Scaling	Buffering
ABAT	0.738044	0.148421	0.89639	-0.0356813	0.662914	0.184102	sp.P80404.GABT_HUMAN	0.458294	-0.277557	0.504029	-0.202584	0.830086	-0.0749736	Buffering	Buffering	Anti-Scaling	Buffering
ABCA1	0.553381	0.3672	0.0365496	-0.619366	0.119552	0.986566	sp.O95477.ABCA1_HUMAN	0.981166	0.0146907	0.107822	-0.511191	0.387482	0.525881	Scaling	Scaling	Buffering	Scaling
ABCA10	0.297779	0.184434	0.792196	-0.0359945	0.210295	0.220428	sp.Q8WWZ4.ABCAA_HUMAN	0.248659	-0.176003	0.530992	-0.106678	0.694548	-0.0693249	Buffering	Buffering	Anti-Scaling	Buffering
ABCA12	0.506205	-0.327143	0.347419	0.254631	0.274229	-0.581774	sp.Q86UK0.ABCAC_HUMAN	0.856312	-0.107854	0.0775379	1.06214	0.1403	-1.16999	Anti-Scaling	Anti-Scaling	Anti-Scaling	Anti-Scaling
ABCA13	0.537962	0.116446	0.183278	-0.248952	0.0847504	0.365398	sp.Q86UQ4.ABCAD_HUMAN	0.306925	-0.535258	0.833873	-0.0872451	0.234763	-0.448013	Buffering	Buffering	Anti-Scaling	Buffering
ABCA2	0.3472	-0.305275	0.0282275	-0.480363	0.608047	0.175088	sp.Q9BZC7.3.ABCA2_HUMAN	0.141596	-0.773602	0.203072	-0.238834	0.261215	-0.534769	Anti-Scaling	Scaling	Anti-Scaling	Buffering
ABCA3	0.465269	0.495294	0.00268357	-0.947951	0.0509123	1.44325	sp.Q99758.ABCA3_HUMAN	0.927322	0.0356347	0.00840689	-0.616244	0.105193	0.651879	Scaling	Scaling	Buffering	Scaling
ABCB1	0.595466	0.217256	0.0647816	-0.436383	0.103403	0.653639	sp.P08183.MDR1_HUMAN	0.859773	0.0619275	0.154726	-0.409653	0.137389	0.471581	Buffering	Scaling	Buffering	Scaling
ABCB10	0.0371212	0.376203	0.0514854	-0.299979	0.00190911	0.676181	sp.Q9NRK6.ABCBA_HUMAN	0.0112915	0.382188	0.862711	-0.0253693	0.0319798	0.407558	Scaling	Scaling	Scaling	Buffering
ABCB4	0.492805	0.128847	0.844156	-0.0323153	0.402036	0.161162	sp.P21439.MDR3_HUMAN	0.162678	-0.836897	0.0805977	-0.422487	0.470761	-0.414409	Buffering	Buffering	Anti-Scaling	Scaling
ABCB5	0.860703	-0.0515682	0.254859	-0.278247	0.253612	0.226679	sp.Q2M3G0.4.ABCB5_HUMAN	0.394703	0.264646	0.790653	-0.111532	0.420599	0.376178	Buffering	Scaling	Scaling	Buffering
ABCB6	0.60958	-0.296833	0.849482	-0.0487167	0.676353	-0.248116	sp.Q9NP58.ABCB6_HUMAN	0.466548	-0.479886	0.91035	-0.021703	0.486068	-0.458183	Anti-Scaling	Buffering	Anti-Scaling	Buffering
ABCB8	0.000410508	0.50969	0.00379419	-0.4164	4.26882e-07	0.92609	sp.Q9NUT2.ABCB8_HUMAN	0.323022	0.165721	0.00742295	-0.426728	0.00209332	0.592449	Scaling	Scaling	Buffering	Scaling
ABCC1	0.6506	0.151072	0.015	-0.480015	0.0914885	0.631087	sp.P33527.MRP1_HUMAN	0.91822	-0.0400858	0.0760715	-0.32523	0.46877	0.285144	Buffering	Scaling	Buffering	Scaling
ABCC10	0.123778	0.3418	0.00898878	-0.283841	0.00954471	0.625641	sp.Q5T3U5.MRP7_HUMAN	0.469703	-0.161521	0.113561	-0.269113	0.652445	0.107593	Scaling	Scaling	Anti-Scaling	Scaling
ABCC3	0.106015	1.08511	0.616747	0.272702	0.245016	0.812408	sp.O15438.4.MRP3_HUMAN	0.238158	0.499041	0.955389	-0.0158696	0.251247	0.51491	Scaling	Anti-Scaling	Scaling	Buffering
ABCC4	0.0800928	0.688527	0.0577054	-0.515805	0.00555802	1.20433	sp.O15439.MRP4_HUMAN	0.188698	0.471814	0.0437651	-0.391489	0.0277963	0.863303	Scaling	Scaling	Scaling	Scaling
ABCC5	0.132134	0.334839	0.0359904	-0.59575	0.00227202	0.930589	sp.O15440.MRP5_HUMAN	0.0916826	0.473604	0.372109	-0.259017	0.050244	0.732621	Scaling	Scaling	Scaling	Scaling
ABCC8	0.875639	-0.0339552	0.644156	0.07307	0.607427	-0.107025	sp.Q09428.2.ABCC8_HUMAN	0.859178	0.117961	0.310716	0.431031	0.639383	-0.31307	Buffering	Buffering	Buffering	Anti-Scaling
ABCD3	0.185098	0.227669	0.0802032	-0.260068	0.0131907	0.487737	sp.P28288.ABCD3_HUMAN	0.410529	0.161004	0.0523966	-0.286837	0.0400725	0.447842	Buffering	Scaling	Buffering	Scaling
ABCD4	0.27897	0.180098	0.00305895	-0.417362	0.00133354	0.59746	sp.O14678.ABCD4_HUMAN	0.787997	0.0872044	0.408305	-0.164815	0.419793	0.252019	Buffering	Scaling	Buffering	Buffering
ABCF1	0.177845	0.273636	0.000812518	-0.473249	0.00136295	0.746884	sp.Q8NE71.ABCF1_HUMAN	0.126808	0.220853	0.071439	-0.248123	0.00366452	0.468976	Scaling	Scaling	Buffering	Buffering
ABCF1	0.177845	0.273636	0.000812518	-0.473249	0.00136295	0.746884	tr.Q5STZ8.Q5STZ8_HUMAN	0.695623	0.28655	0.965291	-0.0215948	0.67139	0.308144	Scaling	Scaling	Scaling	Buffering
ABCF2	0.00645686	0.418696	0.0109483	-0.394521	4.41873e-06	0.813217	sp.Q9UG63.ABCF2_HUMAN	0.132944	0.201116	0.00177912	-0.415308	4.1525e-05	0.616424	Scaling	Scaling	Buffering	Scaling
ABCF3	0.0155936	0.278851	0.000583365	-0.4855	1.39129e-06	0.764351	sp.Q9NUQ8.ABCF3_HUMAN	0.284352	0.148869	0.395824	-0.118373	0.0815639	0.267242	Scaling	Scaling	Buffering	Buffering
ABHD10	0.543026	0.108523	0.651191	0.075336	0.857181	0.0331871	sp.Q9NUJ1.ABHDA_HUMAN	0.056632	0.321525	0.165383	0.215446	0.495252	0.106079	Buffering	Buffering	Scaling	Anti-Scaling
ABHD11	0.286729	0.241127	0.521986	-0.141267	0.0988238	0.382395	sp.Q8NFV4.ABHDB_HUMAN	0.767759	0.0615732	0.725923	-0.0828183	0.555202	0.144391	Buffering	Buffering	Buffering	Buffering
ABHD12	0.0581928	0.364995	0.000491159	-0.644142	5.04315e-07	1.00914	sp.Q8N2K0.ABD12_HUMAN	0.175018	0.233971	0.0125227	-0.340644	0.000835245	0.574615	Scaling	Scaling	Buffering	Scaling
ABHD13	0.0375714	0.376645	0.0001575	-0.405115	0.000626349	0.78176	sp.Q7L211.ABHDD_HUMAN	0.69533	0.0890914	0.133562	-0.287315	0.097431	0.376406	Scaling	Scaling	Buffering	Scaling
ABHD14B	0.997271	0.00180579	8.1567e-06	-0.8926	0.182768	0.894406	sp.Q96IU4.ABHEB_HUMAN	0.639962	0.361549	0.000131593	-0.777443	0.221438	1.13899	Buffering	Scaling	Scaling	Scaling
ABHD16A	0.00278587	0.623035	0.425661	-0.0950826	0.00123365	0.718118	sp.O95870.ABHGA_HUMAN	0.0989152	0.302898	0.745122	-0.0434582	0.071857	0.346356	Scaling	Buffering	Scaling	Buffering
ABHD17A	0.136323	-0.485794	0.0388124	-0.235891	0.394294	-0.249903	sp.Q96GS6.2.AB17A_HUMAN	0.854041	-0.11044	0.515522	-0.124186	0.981315	0.013746	Anti-Scaling	Buffering	Anti-Scaling	Buffering
ABHD17B	0.031223	0.386995	0.00362104	-0.381156	0.000319528	0.768151	sp.Q5VST6.2.AB17B_HUMAN	0.495103	-0.184193	0.02223	-0.41513	0.389861	0.230937	Scaling	Scaling	Anti-Scaling	Scaling
ABHD17C	0.148736	0.690735	0.942424	0.0173935	0.161028	0.673342	sp.Q6PCB6.AB17C_HUMAN	0.16427	1.5454	0.629308	0.171922	0.204313	1.37347	Scaling	Buffering	Scaling	Anti-Scaling
ABHD4	0.669126	0.160671	0.0119997	-0.668375	0.027283	0.829046	sp.Q8TB40.ABHD4_HUMAN	0.243454	0.29034	0.126606	-0.268617	0.0336096	0.558957	Buffering	Scaling	Scaling	Scaling
ABHD5	0.0446028	0.893915	0.0281124	-0.272141	0.0275282	1.16606	sp.Q8WTS1.ABHD5_HUMAN	0.905738	0.0556978	0.900058	-0.0255645	0.862193	0.0812623	Scaling	Scaling	Buffering	Buffering
ABHD6	0.903039	-0.0649879	0.0165328	-0.514252	0.425157	0.449264	sp.Q9BV23.ABHD6_HUMAN	0.403723	-0.301017	0.0794841	-0.380982	0.805421	0.0799648	Buffering	Scaling	Anti-Scaling	Scaling
ABI1	0.0318181	0.349964	6.1086e-05	-0.501776	1.22585e-05	0.85174	sp.Q8IZP0.9.ABI1_HUMAN	0.986102	-0.00269666	0.197547	-0.143166	0.348228	0.140469	Scaling	Scaling	Buffering	Buffering
ABI2	0.0641715	0.977069	0.661682	0.0667089	0.0779058	0.91036	sp.Q9NYB9.2.ABI2_HUMAN	0.17722	0.526533	0.467448	0.0902077	0.248554	0.436325	Scaling	Buffering	Scaling	Buffering
ABI3	0.66107	0.0415341	0.15718	0.33431	0.225058	-0.292776	sp.Q9P2A4.ABI3_HUMAN	0.304049	1.11723	0.452113	0.966629	0.903342	0.150597	Buffering	Anti-Scaling	Scaling	Anti-Scaling
ABI3BP	0.741478	-0.113132	0.139575	-0.382986	0.430967	0.269854	tr.D3YTG3.D3YTG3_HUMAN	0.389784	0.445346	0.468694	0.33029	0.801645	0.115056	Anti-Scaling	Scaling	Scaling	Anti-Scaling
ABL1	0.0314099	0.462166	0.000826342	-0.544765	6.58772e-05	1.00693	sp.P00519.2.ABL1_HUMAN	0.148515	0.431365	0.286099	-0.139704	0.0640795	0.571069	Scaling	Scaling	Scaling	Buffering
ABL2	0.928725	0.0259418	0.529183	-0.186057	0.553961	0.211999	sp.P42684.ABL2_HUMAN	0.838192	0.0485576	0.199825	-0.230167	0.309702	0.278725	Buffering	Buffering	Buffering	Buffering
ABLIM1	0.496008	0.486095	0.0107898	-0.894738	0.0727678	1.38083	tr.Q5T6N4.Q5T6N4_HUMAN	0.820205	0.10741	0.0712512	-0.433094	0.268605	0.540504	Scaling	Scaling	Buffering	Scaling
ABLIM3	0.255349	0.854663	0.332789	0.350338	0.489249	0.504325	sp.O94929.3.ABLM3_HUMAN	0.331254	0.604747	0.664868	-0.134375	0.228793	0.739122	Scaling	Anti-Scaling	Scaling	Buffering
ABR	0.0353997	0.783341	0.83632	0.0605753	0.0204121	0.722766	sp.Q12979.ABR_HUMAN	0.187859	0.539343	0.979952	-0.00469462	0.175772	0.544037	Scaling	Buffering	Scaling	Buffering
ABT1	0.0730603	0.291498	0.00028016	-0.418414	0.000266475	0.709912	sp.Q9ULW3.ABT1_HUMAN	0.420529	-0.131666	0.203903	-0.175983	0.806299	0.0443179	Scaling	Scaling	Anti-Scaling	Buffering
ABTB2	0.60299	-0.166326	0.593673	-0.124827	0.896664	-0.041499	sp.Q8N961.ABTB2_HUMAN	0.829349	0.0946017	0.741922	-0.0944562	0.661933	0.189058	Anti-Scaling	Buffering	Buffering	Buffering
ACAA1	0.19238	0.557221	0.560941	-0.079892	0.152869	0.637113	sp.P09110.THIK_HUMAN	0.309242	-0.51579	0.746413	0.0482502	0.276532	-0.56404	Scaling	Buffering	Anti-Scaling	Buffering
ACAA2	0.292225	0.437456	0.0152128	-0.77715	0.00753538	1.21461	sp.P42765.THIM_HUMAN	0.721808	0.233828	0.0543894	-0.490166	0.285367	0.723994	Scaling	Scaling	Buffering	Scaling
ACACA	0.705441	0.0720786	0.0735814	-0.2586	0.0826308	0.330679	sp.Q13085.4.ACACA_HUMAN	0.0341879	0.363155	0.600843	-0.0776559	0.0265387	0.440811	Buffering	Scaling	Scaling	Buffering
ACACB	0.90919	-0.0378691	0.3746	-0.183529	0.685975	0.145659	sp.O00763.ACACB_HUMAN	0.0402671	0.533427	0.765371	0.0451596	0.0663243	0.488267	Buffering	Buffering	Scaling	Buffering
ACAD10	0.213535	0.276433	0.0160513	-0.395113	0.0131338	0.671546	sp.Q6JQN1.5.ACD10_HUMAN	0.543303	-0.0798453	0.120083	-0.216762	0.367073	0.136916	Scaling	Scaling	Buffering	Buffering
ACAD11	0.9482	0.0124597	0.132622	-0.363453	0.146341	0.375912	sp.Q709F0.ACD11_HUMAN	0.541899	-0.142143	0.28928	-0.269385	0.641552	0.127242	Buffering	Scaling	Anti-Scaling	Scaling
ACAD8	0.00526775	0.528881	0.451037	-0.114868	0.000721613	0.643748	sp.Q9UKU7.ACAD8_HUMAN	0.252854	0.195015	0.574066	-0.0921383	0.085355	0.287154	Scaling	Buffering	Buffering	Buffering
ACAD9	0.0653284	0.216729	0.0274814	-0.303467	0.00164356	0.520196	sp.Q9H845.ACAD9_HUMAN	0.00668565	0.340844	0.095119	-0.229943	0.000329978	0.570788	Buffering	Scaling	Scaling	Buffering
ACADM	0.439925	0.185205	0.000569831	-0.460547	0.0144578	0.645752	sp.P11310.2.ACADM_HUMAN	0.489585	0.186602	0.00459151	-0.371948	0.0551679	0.55855	Buffering	Scaling	Buffering	Scaling
ACADS	0.00259771	0.981269	0.684862	-0.0917446	0.00183796	1.07301	sp.P16219.ACADS_HUMAN	0.0385238	0.741282	0.50259	0.154669	0.0972711	0.586614	Scaling	Buffering	Scaling	Anti-Scaling
ACADSB	0.00873248	0.670486	0.365089	-0.156606	0.00259994	0.827092	sp.P45954.ACDSB_HUMAN	0.0382216	0.625524	0.404367	-0.134707	0.0151799	0.760231	Scaling	Buffering	Scaling	Buffering
ACADVL	0.573214	0.156863	0.0120329	-0.41107	0.0545515	0.567933	sp.P49748.3.ACADV_HUMAN	0.117116	0.447671	0.618283	-0.0935362	0.0490225	0.541207	Buffering	Scaling	Scaling	Buffering
ACAP1	0.387732	0.476683	0.598763	-0.116129	0.286445	0.592813	sp.Q15027.ACAP1_HUMAN	0.497399	-1.25824	0.340428	0.296687	0.409862	-1.55492	Scaling	Buffering	Anti-Scaling	Anti-Scaling
ACAP2	0.113898	0.253297	0.163515	-0.254296	0.0103354	0.507593	sp.Q15057.ACAP2_HUMAN	0.714063	0.0608012	0.247383	-0.238729	0.205587	0.29953	Scaling	Scaling	Buffering	Buffering
ACAP3	0.156103	-0.501671	0.233949	-0.226283	0.430949	-0.275388	sp.Q96P50.ACAP3_HUMAN	0.126587	-0.483941	0.287861	0.275382	0.0269039	-0.759323	Anti-Scaling	Buffering	Anti-Scaling	Anti-Scaling
ACAT1	0.54155	0.154472	0.0428778	-0.35757	0.0531224	0.512043	sp.P24752.THIL_HUMAN	0.36605	0.189294	0.0515943	-0.307069	0.0201533	0.496363	Buffering	Scaling	Buffering	Scaling
ACBD3	0.847128	0.0183771	0.121344	-0.238883	0.121939	0.25726	sp.Q9H3P7.GCP60_HUMAN	0.295348	-0.103129	0.011831	-0.373174	0.074123	0.270045	Buffering	Buffering	Anti-Scaling	Scaling
ACBD4	0.0287765	0.602321	0.655169	-0.0750619	0.0162824	0.677383	sp.Q8NC06.2.ACBD4_HUMAN	0.308788	0.487793	0.103262	-0.668694	0.0302756	1.15649	Scaling	Buffering	Scaling	Scaling
ACBD5	0.32894	0.254185	0.000163918	-0.593803	0.00312599	0.847988	sp.Q5T8D3.ACBD5_HUMAN	0.620684	0.123033	0.0114521	-0.415296	0.0333818	0.538329	Scaling	Scaling	Buffering	Scaling
ACBD6	0.0381526	0.210388	0.000764318	-0.579472	3.2522e-05	0.78986	sp.Q9BR61.ACBD6_HUMAN	0.079281	0.407503	0.137257	-0.282503	0.0127795	0.690006	Buffering	Scaling	Scaling	Scaling
ACBD7	0.229996	0.456918	0.214042	-0.292525	0.0464024	0.749443	sp.Q8N6N7.ACBD7_HUMAN	0.434212	0.551044	0.260293	-0.33151	0.227294	0.882554	Scaling	Scaling	Scaling	Scaling
ACE	0.590993	0.146284	0.131464	-0.313406	0.100013	0.45969	sp.P12821.ACE_HUMAN	0.968937	0.0133831	0.298846	-0.339993	0.252264	0.353376	Buffering	Scaling	Buffering	Scaling
ACIN1	0.587956	0.0902925	0.0017072	-0.411837	0.00829248	0.50213	tr.E7EQT4.E7EQT4_HUMAN	0.257225	-0.18419	0.0936085	-0.229094	0.762962	0.0449036	Buffering	Scaling	Anti-Scaling	Buffering
ACIN1	0.587956	0.0902925	0.0017072	-0.411837	0.00829248	0.50213	sp.Q9UKV3.5.ACINU_HUMAN	0.463773	-0.103355	0.0382625	-0.20062	0.4856	0.0972653	Buffering	Scaling	Anti-Scaling	Buffering
ACLY	0.255016	0.246704	0.606169	-0.0831303	0.14744	0.329835	sp.P53396.ACLY_HUMAN	0.00519399	0.533794	0.867444	0.0266776	0.0194418	0.507116	Buffering	Buffering	Scaling	Buffering
ACLY	0.255016	0.246704	0.606169	-0.0831303	0.14744	0.329835	sp.P53396.2.ACLY_HUMAN	0.591573	0.252514	0.788181	-0.071244	0.513217	0.323758	Buffering	Buffering	Scaling	Buffering
ACO1	0.680908	0.135053	0.300518	-0.214255	0.263053	0.349308	sp.P21399.ACOC_HUMAN	0.997772	-0.000761311	0.687885	-0.0902033	0.694112	0.0894419	Buffering	Buffering	Buffering	Buffering
ACO2	0.332054	0.254718	5.71148e-05	-0.498352	0.0240204	0.75307	sp.Q99798.ACON_HUMAN	0.324252	0.255664	0.00942659	-0.343865	0.045307	0.599529	Scaling	Scaling	Scaling	Scaling
ACOT1	0.152831	0.457941	0.0029064	-0.805865	0.000483136	1.26381	sp.Q86TX2.ACOT1_HUMAN	0.354782	0.355808	0.00470718	-1.43339	0.00126859	1.7892	Scaling	Scaling	Scaling	Scaling
ACOT11	0.297162	0.297167	0.219272	-0.332735	0.034636	0.629902	sp.Q8WXI4.2.ACO11_HUMAN	0.512373	-0.222061	0.187745	-0.34021	0.69563	0.118149	Scaling	Scaling	Anti-Scaling	Scaling
ACOT13	0.0878413	0.591521	0.430677	-0.137433	0.0426855	0.728954	sp.Q9NPJ3.ACO13_HUMAN	0.325279	0.355385	0.103811	-0.275641	0.0936221	0.631026	Scaling	Buffering	Scaling	Scaling
ACOT2	0.142592	0.359945	0.00038787	-1.07835	7.31982e-06	1.4383	sp.P49753.ACOT2_HUMAN	0.0275466	0.539417	0.00167642	-0.590594	3.99239e-05	1.13001	Scaling	Scaling	Scaling	Scaling
ACOT4	0.953962	-0.0224344	0.00294788	-0.702183	0.0791214	0.679748	sp.Q8N9L9.ACOT4_HUMAN	0.382819	0.734601	0.543087	-0.443577	0.0696895	1.17818	Buffering	Scaling	Scaling	Scaling
ACOT7	0.423749	0.252256	0.0248511	-0.419896	0.0459511	0.672151	sp.O00154.BACH_HUMAN	0.983719	0.00741543	0.00226881	-0.51905	0.156721	0.526465	Scaling	Scaling	Buffering	Scaling
ACOT8	6.42982e-06	0.533734	0.0340969	-0.38515	5.93114e-05	0.918884	sp.O14734.ACOT8_HUMAN	0.000994878	0.422044	0.0384711	-0.568377	0.00175129	0.990421	Scaling	Scaling	Scaling	Scaling
ACOX1	0.267618	0.244633	0.565669	-0.0927697	0.153942	0.337403	sp.Q15067.2.ACOX1_HUMAN	0.547183	-0.126074	0.736323	-0.0616242	0.781261	-0.0644493	Buffering	Buffering	Anti-Scaling	Buffering
ACOX3	0.394563	0.712989	0.0630645	-0.280083	0.271767	0.993071	sp.O15254.ACOX3_HUMAN	0.00135043	0.769077	0.4276	-0.184015	1.00799e-08	0.953092	Scaling	Scaling	Scaling	Buffering
ACP1	0.00499507	0.418858	7.79986e-05	-0.55848	1.62817e-06	0.977338	sp.P24666.PPAC_HUMAN	0.00300231	0.818714	0.0669232	-0.405343	0.000213657	1.22406	Scaling	Scaling	Scaling	Scaling
ACP1	0.00499507	0.418858	7.79986e-05	-0.55848	1.62817e-06	0.977338	sp.P24666.2.PPAC_HUMAN	0.591064	0.152231	0.53714	-0.27265	0.290228	0.424881	Scaling	Scaling	Buffering	Scaling
ACP2	0.162673	0.415402	0.819747	-0.0353146	0.136323	0.450716	sp.P11117.PPAL_HUMAN	0.767664	0.0700548	0.556547	0.0882441	0.935899	-0.0181892	Scaling	Buffering	Buffering	Buffering
ACP5	0.781856	0.283213	0.876867	0.0641881	0.824592	0.219025	sp.P13686.PPA5_HUMAN	0.949232	-0.0416901	0.614064	0.210523	0.68251	-0.252213	Scaling	Buffering	Buffering	Anti-Scaling
ACP6	0.910988	-0.0280574	0.182692	-0.37783	0.225874	0.349772	sp.Q9NPH0.PPA6_HUMAN	0.555988	0.151844	0.348051	-0.220314	0.156511	0.372158	Buffering	Scaling	Buffering	Buffering
ACPP	0.216827	0.305295	0.960732	0.0131933	0.342312	0.292102	sp.P15309.2.PPAP_HUMAN	0.304905	0.42517	0.771344	-0.119366	0.285508	0.544536	Scaling	Buffering	Scaling	Buffering
ACSF2	0.503559	-0.208707	0.762793	-0.0746847	0.701068	-0.134023	sp.Q96CM8.ACSF2_HUMAN	0.267552	-0.226379	0.613749	-0.11602	0.659632	-0.110359	Anti-Scaling	Buffering	Anti-Scaling	Buffering
ACSF3	0.865044	0.0740758	0.0801896	-0.244754	0.479176	0.31883	sp.Q4G176.ACSF3_HUMAN	0.594949	-0.226334	0.782181	-0.0313475	0.643554	-0.194986	Buffering	Buffering	Anti-Scaling	Buffering
ACSL3	0.505709	-0.203853	0.526564	0.112192	0.330949	-0.316045	sp.O95573.ACSL3_HUMAN	0.757476	0.0954344	0.981275	-0.00339271	0.75173	0.0988271	Anti-Scaling	Anti-Scaling	Buffering	Buffering
ACSL5	0.579277	-0.450738	0.148453	-0.68315	0.761446	0.232412	sp.Q9ULC5.3.ACSL5_HUMAN	0.20525	-0.549415	0.416862	-0.234424	0.42863	-0.314991	Anti-Scaling	Scaling	Anti-Scaling	Buffering
ACSL6	0.262628	-0.10863	0.703597	-0.0324212	0.42446	-0.076209	sp.Q9UKU0.9.ACSL6_HUMAN	0.630759	-0.13722	0.62087	0.142241	0.397316	-0.27946	Anti-Scaling	Buffering	Anti-Scaling	Anti-Scaling
ACSM3	0.499199	0.452652	0.174354	-0.380349	0.220598	0.833001	sp.Q53FZ2.ACSM3_HUMAN	0.258773	0.574488	0.717368	-0.106872	0.168985	0.681359	Scaling	Scaling	Scaling	Buffering
ACSS1	0.640424	0.197523	0.0723011	-0.672927	0.0215044	0.870449	sp.Q9NUB1.ACS2L_HUMAN	0.605241	-0.174792	0.0898638	-0.456314	0.350579	0.281522	Buffering	Scaling	Anti-Scaling	Scaling
ACSS2	0.0555639	0.345569	0.461441	-0.336868	0.149818	0.682438	sp.Q9NR19.2.ACSA_HUMAN	0.332803	0.160801	0.252614	-0.350839	0.105986	0.511641	Scaling	Scaling	Buffering	Scaling
ACSS3	0.69705	-0.179158	0.263447	-0.322046	0.758152	0.142888	sp.Q9H6R3.ACSS3_HUMAN	0.462499	-0.690866	0.605332	0.234528	0.347746	-0.925394	Anti-Scaling	Scaling	Anti-Scaling	Anti-Scaling
ACTA2	0.119493	1.25835	0.228045	-0.463967	0.0397951	1.72231	sp.P62736.ACTA_HUMAN	0.233703	-0.134635	0.59815	0.0455329	0.102613	-0.180168	Scaling	Scaling	Anti-Scaling	Buffering
ACTB	0.694569	0.0606141	0.0609164	-0.514397	0.0318809	0.575011	sp.P60709.ACTB_HUMAN	0.368688	0.0702403	0.599711	0.0613895	0.934091	0.00885088	Buffering	Scaling	Buffering	Buffering
ACTBL2	0.0927402	0.676226	0.871429	0.0242403	0.102369	0.651985	sp.Q562R1.ACTBL_HUMAN	0.937724	0.0164717	0.492031	-0.0931033	0.590887	0.109575	Scaling	Buffering	Buffering	Buffering
ACTG1	0.969549	0.00930539	0.239167	-0.22939	0.383919	0.238695	tr.K7EM38.K7EM38_HUMAN	0.298202	-0.337541	0.674172	-0.0882892	0.45277	-0.249252	Buffering	Buffering	Anti-Scaling	Buffering
ACTL6A	0.00378636	0.32876	0.000109875	-0.559468	2.74456e-08	0.888228	sp.O96019.ACL6A_HUMAN	0.014177	0.274352	0.0655003	-0.180552	6.98943e-05	0.454905	Scaling	Scaling	Scaling	Buffering
ACTL8	0.910984	-0.0908319	0.644941	-0.180957	0.91258	0.0901254	sp.Q9H568.ACTL8_HUMAN	0.473489	-0.335327	0.683832	-0.135566	0.678616	-0.199761	Buffering	Buffering	Anti-Scaling	Buffering
ACTN1	0.288164	0.30585	0.147837	-0.367433	0.0370686	0.673283	sp.P12814.4.ACTN1_HUMAN	0.304686	0.250248	0.279886	-0.199947	0.0875547	0.450195	Scaling	Scaling	Scaling	Buffering
ACTN1	0.288164	0.30585	0.147837	-0.367433	0.0370686	0.673283	sp.P12814.ACTN1_HUMAN	0.327563	0.327903	0.337962	-0.17014	0.147368	0.498042	Scaling	Scaling	Scaling	Buffering
ACTN2	0.901418	-0.0326614	0.896959	0.0354015	0.847655	-0.0680628	sp.P35609.ACTN2_HUMAN	0.522802	0.888801	0.267305	0.796474	0.947984	0.092327	Buffering	Buffering	Scaling	Anti-Scaling
ACTN3	0.605042	-0.0500939	0.80967	0.0319268	0.471077	-0.0820207	sp.Q08043.ACTN3_HUMAN	0.255739	-1.07139	0.321497	-0.93781	0.762137	-0.133584	Buffering	Buffering	Anti-Scaling	Scaling
ACTN4	0.0587094	0.434527	0.0394083	-0.448399	0.000833016	0.882926	tr.H7C144.H7C144_HUMAN	0.0341548	1.1201	0.392547	-0.467663	0.000855603	1.58776	Scaling	Scaling	Scaling	Scaling
ACTN4	0.0587094	0.434527	0.0394083	-0.448399	0.000833016	0.882926	sp.O43707.ACTN4_HUMAN	0.0305062	0.52414	0.30769	-0.194412	0.00570526	0.718552	Scaling	Scaling	Scaling	Buffering
ACTR10	0.00858154	0.373614	0.000224758	-0.487741	2.94383e-07	0.861355	sp.Q9NZ32.ARP10_HUMAN	0.934898	0.0135247	0.623894	0.0562079	0.789615	-0.0426832	Scaling	Scaling	Buffering	Buffering
ACTR1A	0.0552098	0.491172	1.53087e-05	-0.481461	0.00155971	0.972633	sp.P61163.ACTZ_HUMAN	0.35492	0.184233	0.0292632	-0.245176	0.0378296	0.429409	Scaling	Scaling	Buffering	Buffering
ACTR1B	0.909478	0.0318666	0.633829	-0.0638913	0.741495	0.0957579	sp.P42025.ACTY_HUMAN	0.855486	0.10335	0.631018	-0.088825	0.739396	0.192175	Buffering	Buffering	Buffering	Buffering
ACTR2	0.0797575	0.290114	0.156431	-0.167025	0.0160826	0.457139	sp.P61160.ARP2_HUMAN	0.789402	-0.042931	0.303144	-0.112528	0.696213	0.0695971	Scaling	Buffering	Buffering	Buffering
ACTR3	0.333936	0.244456	0.280678	-0.186853	0.0993139	0.431309	sp.P61158.ARP3_HUMAN	0.165305	0.298293	0.441062	-0.0783611	0.0906899	0.376654	Buffering	Buffering	Scaling	Buffering
ACTR3B	0.00262547	0.545569	0.211684	-0.197422	0.000257637	0.742991	sp.Q9P1U1.ARP3B_HUMAN	0.266427	0.122043	0.665776	-0.041435	0.207786	0.163478	Scaling	Buffering	Buffering	Buffering
ACTR5	0.0752039	0.20252	0.0140539	-0.529575	0.00155476	0.732095	sp.Q9H9F9.ARP5_HUMAN	0.742905	-0.0311667	0.597654	-0.0789926	0.749413	0.0478259	Buffering	Scaling	Buffering	Buffering
ACTR6	0.971147	-0.00783963	0.29341	-0.133136	0.582947	0.125297	sp.Q9GZN1.ARP6_HUMAN	0.240836	-0.133696	0.751102	-0.0236874	0.338543	-0.110008	Buffering	Buffering	Anti-Scaling	Buffering
ACTR8	0.488674	0.114485	0.00105686	-0.383938	0.0327543	0.498423	sp.Q9H981.ARP8_HUMAN	0.851374	0.0311747	0.20999	-0.101852	0.443248	0.133027	Buffering	Scaling	Buffering	Buffering
ACVR1	0.0988374	0.96026	0.0391714	-0.372331	0.0380036	1.33259	sp.Q04771.ACVR1_HUMAN	0.251434	1.04229	0.174659	-0.281931	0.175213	1.32422	Scaling	Scaling	Scaling	Scaling
ACVR1B	0.624319	-0.115364	0.0161866	-0.352978	0.344196	0.237614	sp.P36896.4.ACV1B_HUMAN	0.333086	0.24606	0.991477	0.00322178	0.425949	0.242839	Anti-Scaling	Scaling	Buffering	Buffering
ACY1	0.948825	0.00984778	0.313036	-0.166815	0.131183	0.176663	sp.Q03154.ACY1_HUMAN	0.814864	0.0835517	0.09393	-0.319198	0.301214	0.40275	Buffering	Buffering	Buffering	Scaling
ACY3	0.958756	0.0121271	0.266345	0.192259	0.478474	-0.180132	sp.Q96HD9.ACY3_HUMAN	0.372517	0.968965	0.212499	-0.674107	0.15665	1.64307	Buffering	Anti-Scaling	Scaling	Scaling
ACYP1	0.643124	0.085536	0.169912	-0.187606	0.146931	0.273142	sp.P07311.ACYP1_HUMAN	0.680184	0.115863	0.847603	-0.03812	0.568524	0.153983	Buffering	Buffering	Buffering	Buffering
ACYP2	0.33815	0.183794	0.453791	-0.137574	0.18019	0.321368	sp.P14621.ACYP2_HUMAN	0.0550162	0.395257	0.511021	-0.129968	0.0460209	0.525225	Buffering	Buffering	Scaling	Buffering
ADA	0.241383	0.301908	0.0172599	-1.02595	0.00353668	1.32785	sp.P00813.ADA_HUMAN	0.121067	0.302313	0.208307	-0.347449	0.0269803	0.649762	Scaling	Scaling	Scaling	Scaling
ADAL	0.59309	-0.12141	0.000195823	-0.501126	0.107692	0.379715	sp.Q6DHV7.ADAL_HUMAN	0.0723795	0.432381	0.176949	-0.222947	0.0109193	0.655328	Anti-Scaling	Scaling	Scaling	Buffering
ADAM10	0.105542	0.430609	0.00386316	-0.511702	0.00259296	0.94231	sp.O14672.ADA10_HUMAN	0.0870877	0.497071	0.889979	0.0185101	0.100164	0.478561	Scaling	Scaling	Scaling	Buffering
ADAM15	0.384507	0.190079	0.433801	-0.222229	0.195962	0.412308	sp.Q13444.5.ADA15_HUMAN	0.798968	0.0458241	0.571945	-0.110513	0.478619	0.156337	Buffering	Buffering	Buffering	Buffering
ADAM17	0.0627501	0.306458	0.0929606	-0.281062	0.00626814	0.58752	sp.P78536.ADA17_HUMAN	0.234927	-0.177473	0.39445	-0.141712	0.85871	-0.0357609	Scaling	Scaling	Anti-Scaling	Buffering
ADAM22	0.649723	0.112045	0.483256	0.157098	0.860106	-0.0450532	sp.Q9P0K1.ADA22_HUMAN	0.0902239	0.702499	0.721494	0.271801	0.572286	0.430698	Buffering	Anti-Scaling	Scaling	Anti-Scaling
ADAM28	0.890414	0.118039	0.124439	-0.555666	0.418039	0.673704	sp.Q9UKQ2.ADA28_HUMAN	0.796981	-0.583404	0.34421	-1.85469	0.435518	1.27129	Buffering	Scaling	Anti-Scaling	Scaling
ADAM8	0.363679	-0.479248	0.274809	-0.371391	0.834311	-0.107856	sp.P78325.ADAM8_HUMAN	0.935055	-0.105333	0.38455	-0.460235	0.787187	0.354902	Anti-Scaling	Scaling	Anti-Scaling	Scaling
ADAM9	0.00603941	1.14395	0.834442	-0.0529146	0.00393293	1.19686	sp.Q13443.ADAM9_HUMAN	0.0422019	0.847204	0.329449	0.203774	0.0967609	0.64343	Scaling	Buffering	Scaling	Anti-Scaling
ADAMTS1	0.213643	1.03859	0.0309062	-1.01479	0.0172023	2.05338	sp.Q9UHI8.ATS1_HUMAN	0.660677	-0.362785	0.00235613	-1.32829	0.240214	0.965506	Scaling	Scaling	Anti-Scaling	Scaling
ADAMTSL1	0.717601	0.246961	0.430815	-0.313644	0.356914	0.560605	sp.Q8N6G6.ATL1_HUMAN	0.605138	-0.230044	0.176179	0.498722	0.146199	-0.728766	Buffering	Scaling	Anti-Scaling	Anti-Scaling
ADAMTSL4	0.195835	0.539633	0.0585863	1.26736	0.312478	-0.727728	sp.Q6UY14.ATL4_HUMAN	0.256307	0.53615	0.165122	1.85595	0.313532	-1.3198	Scaling	Anti-Scaling	Scaling	Anti-Scaling
ADAP1	0.250269	0.49436	0.930871	-0.039327	0.230792	0.533687	sp.O75689.ADAP1_HUMAN	0.472108	0.218811	0.494734	-0.217847	0.144109	0.436658	Scaling	Buffering	Buffering	Buffering
ADAR	0.00669149	0.40426	0.120699	-0.375921	0.00483432	0.780181	sp.P55265.4.DSRAD_HUMAN	0.304842	0.139797	0.100241	-0.283271	0.0308812	0.423068	Scaling	Scaling	Buffering	Scaling
ADARB1	0.556381	0.253702	0.00504227	-0.604308	0.0629551	0.85801	sp.P78563.RED1_HUMAN	0.567706	-0.246027	0.000384101	-0.600173	0.414641	0.354146	Scaling	Scaling	Anti-Scaling	Scaling
ADAT3	0.868584	0.0781316	0.581924	-0.0786428	0.735885	0.156774	sp.Q96EY9.ADAT3_HUMAN	0.054944	-0.557073	0.196352	-0.27887	0.289452	-0.278203	Buffering	Buffering	Anti-Scaling	Scaling
ADCK1	0.485014	0.125888	0.000406886	-0.451637	0.00319927	0.577525	sp.Q86TW2.ADCK1_HUMAN	0.966557	-0.0147084	0.907764	-0.0289893	0.967257	0.0142809	Buffering	Scaling	Buffering	Buffering
ADCK5	0.0953978	0.277855	0.595824	-0.0972543	0.058674	0.37511	sp.Q3MIX3.ADCK5_HUMAN	0.939956	-0.0230002	0.0302071	-0.560868	0.0527558	0.537868	Scaling	Buffering	Buffering	Scaling
ADCY3	0.183299	0.307099	0.0465924	-0.595515	0.0103493	0.902614	sp.O60266.ADCY3_HUMAN	0.540787	0.141233	0.512246	-0.0871882	0.34427	0.228421	Scaling	Scaling	Buffering	Buffering
ADCY5	0.269985	0.267739	0.555112	0.212105	0.890301	0.0556331	sp.O95622.ADCY5_HUMAN	0.360673	-0.192532	0.818186	-0.0567847	0.611562	-0.135747	Scaling	Anti-Scaling	Anti-Scaling	Buffering
ADCY6	0.242162	0.530148	0.0665483	-0.458401	0.0515568	0.988549	sp.O43306.ADCY6_HUMAN	0.110229	0.627346	0.455855	-0.183165	0.0574504	0.810511	Scaling	Scaling	Scaling	Buffering
ADCY9	0.424688	0.291564	0.278348	-0.21089	0.176417	0.502453	sp.O60503.ADCY9_HUMAN	0.982766	0.00701637	0.408031	-0.140778	0.62687	0.147795	Scaling	Buffering	Buffering	Buffering
ADD1	0.818748	0.138698	0.0122071	-0.339256	0.459895	0.477955	sp.P35611.3.ADDA_HUMAN	0.473171	-0.31681	0.688146	-0.0625823	0.553034	-0.254228	Buffering	Scaling	Anti-Scaling	Buffering
ADD2	0.855243	-0.106723	0.144921	-0.679129	0.377259	0.572406	sp.P35612.ADDB_HUMAN	0.551482	-0.339479	0.0904879	-0.710913	0.550373	0.371434	Anti-Scaling	Scaling	Anti-Scaling	Scaling
ADD3	0.853104	-0.0746732	0.381114	-0.231996	0.681507	0.157323	sp.Q9UEY8.ADDG_HUMAN	0.480629	0.253879	0.412225	-0.155114	0.254371	0.408993	Buffering	Buffering	Scaling	Buffering
ADI1	0.0822705	0.312669	0.0873749	-0.240262	0.00720625	0.552931	sp.Q9BV57.MTND_HUMAN	0.0149662	0.726513	0.255146	-0.278299	0.00495741	1.00481	Scaling	Buffering	Scaling	Scaling
ADIPOR1	0.495795	0.0534951	0.0378494	-0.380086	0.0188116	0.433581	sp.Q96A54.ADR1_HUMAN	0.0104288	0.949798	0.91589	-0.0319905	0.0179989	0.981789	Buffering	Scaling	Scaling	Buffering
ADIPOR2	0.0903976	0.208396	0.00497582	-0.377144	0.000270773	0.58554	sp.Q86V24.ADR2_HUMAN	0.649805	0.237112	0.981206	0.0116814	0.721902	0.225431	Buffering	Scaling	Buffering	Buffering
ADIRF	0.986706	0.0213615	0.680808	0.287511	0.833674	-0.266149	sp.Q15847.ADIRF_HUMAN	0.87131	0.117334	0.54191	0.326517	0.743228	-0.209183	Buffering	Anti-Scaling	Buffering	Anti-Scaling
ADK	0.409958	0.195583	0.504558	-0.116799	0.224187	0.312382	sp.P55263.ADK_HUMAN	0.189728	0.361278	0.561734	-0.0984626	0.106058	0.459741	Buffering	Buffering	Scaling	Buffering
ADNP	0.0492785	0.198552	0.990727	-0.00301671	0.454919	0.201569	sp.Q9H2P0.ADNP_HUMAN	0.629735	0.0611972	0.941343	-0.0140039	0.701542	0.0752011	Buffering	Buffering	Buffering	Buffering
ADNP2	0.786384	0.099613	0.00427057	-0.427608	0.176666	0.527221	sp.Q6IQ32.ADNP2_HUMAN	0.134695	-0.627421	0.0306024	-0.369565	0.500996	-0.257856	Buffering	Scaling	Anti-Scaling	Scaling
ADO	0.419608	0.138133	0.315316	-0.130399	0.158133	0.268532	sp.Q96SZ5.AEDO_HUMAN	0.711551	0.0650325	0.643436	-0.0623148	0.500969	0.127347	Buffering	Buffering	Buffering	Buffering
ADPGK	0.0117685	0.346007	4.88466e-05	-0.50077	2.71678e-06	0.846777	sp.Q9BRR6.ADPGK_HUMAN	0.332112	0.190303	0.0336768	-0.328137	0.0202274	0.51844	Scaling	Scaling	Buffering	Scaling
ADPRH	0.196225	-0.294729	0.0653147	-0.465398	0.521684	0.170669	sp.P54922.ADPRH_HUMAN	0.999593	0.000205449	0.60418	-0.189703	0.669942	0.189908	Anti-Scaling	Scaling	Buffering	Buffering
ADPRHL2	0.000103505	0.485212	1.83385e-06	-0.529774	2.14523e-10	1.01499	sp.Q9NX46.ARHL2_HUMAN	0.393198	0.191361	0.00678827	-0.348422	0.0258416	0.539783	Scaling	Scaling	Buffering	Scaling
ADRM1	0.015041	0.281923	0.198694	-0.230682	0.00807851	0.512604	sp.Q16186.ADRM1_HUMAN	0.00475311	0.271003	0.737687	-0.0448702	0.0272705	0.315873	Scaling	Buffering	Scaling	Buffering
ADSL	0.0452767	0.198568	8.74432e-06	-0.548657	8.48999e-11	0.747225	sp.P30566.PUR8_HUMAN	0.680916	0.236911	0.00209912	-0.39401	0.301799	0.630921	Buffering	Scaling	Buffering	Scaling
ADSS	0.747392	0.0315661	0.108114	-0.267806	0.0786924	0.299372	sp.P30520.PURA2_HUMAN	0.607487	0.0835337	0.563898	-0.105069	0.372128	0.188603	Buffering	Scaling	Buffering	Buffering
ADSSL1	0.511886	0.280239	0.00108661	-0.832069	0.0121377	1.11231	sp.Q8N142.PURA1_HUMAN	0.843469	-0.0487469	0.354949	-0.188033	0.488217	0.139286	Scaling	Scaling	Buffering	Buffering
AEBP1	0.173346	0.50552	0.0457863	1.41573	0.184277	-0.910208	sp.Q8IUX7.AEBP1_HUMAN	0.0946589	0.645666	0.026429	2.4202	0.0685462	-1.77453	Scaling	Anti-Scaling	Scaling	Anti-Scaling
AEBP2	0.00286681	0.341574	0.00265954	-0.430738	4.20486e-08	0.772313	sp.Q6ZN18.AEBP2_HUMAN	0.822297	0.090513	0.00176468	-0.581401	0.130724	0.671914	Scaling	Scaling	Buffering	Scaling
AES	0.858101	-0.0663639	0.478638	-0.111236	0.899502	0.0448726	sp.Q08117.2.AES_HUMAN	0.159669	-0.463724	0.533024	-0.102368	0.244228	-0.361355	Buffering	Buffering	Anti-Scaling	Buffering
AFAP1	0.70159	-0.225073	0.032886	-0.577037	0.550624	0.351964	sp.Q8N556.2.AFAP1_HUMAN	0.616272	-0.294652	0.680765	-0.113208	0.743126	-0.181444	Anti-Scaling	Scaling	Anti-Scaling	Buffering
AFAP1L1	0.55684	0.290138	0.976354	-0.00945726	0.536969	0.299596	sp.Q8TED9.AF1L1_HUMAN	0.863353	0.0668932	0.781573	0.101787	0.925488	-0.0348941	Scaling	Buffering	Buffering	Anti-Scaling
AFAP1L2	0.589075	0.511095	0.514343	-0.259648	0.420994	0.770743	sp.Q8N4X5.4.AF1L2_HUMAN	0.393086	0.631945	0.673315	-0.146878	0.289764	0.778823	Scaling	Scaling	Scaling	Buffering
AFF3	0.900246	0.0814231	0.148422	0.398177	0.643117	-0.316754	sp.P51826.2.AFF3_HUMAN	0.220723	-0.480964	0.180139	0.301792	0.0630471	-0.782756	Buffering	Anti-Scaling	Anti-Scaling	Anti-Scaling
AFF4	0.260777	0.195709	0.00981493	-0.37976	0.00286939	0.575469	sp.Q9UHB7.AFF4_HUMAN	0.503546	0.11093	0.959337	-0.00529732	0.481781	0.116227	Buffering	Scaling	Buffering	Buffering
AFG3L2	0.0356703	0.425332	0.000429364	-0.463162	0.000105223	0.888494	sp.Q9Y4W6.AFG32_HUMAN	0.0149093	0.369377	0.00195206	-0.378262	1.26474e-05	0.747639	Scaling	Scaling	Scaling	Scaling
AFMID	0.682759	0.0723764	0.0445035	-0.314887	0.0533958	0.387264	sp.Q63HM1.2.KFA_HUMAN	0.623383	-0.345316	0.219633	-0.431454	0.90166	0.086138	Buffering	Scaling	Anti-Scaling	Scaling
AFTPH	0.390168	0.145146	0.0101337	-0.300296	0.0211801	0.445442	sp.Q6ULP2.AFTIN_HUMAN	0.482038	0.140109	0.0916849	-0.219661	0.103013	0.35977	Buffering	Scaling	Buffering	Buffering
AGAP1	0.720191	0.13967	0.208766	-0.214292	0.382627	0.353963	sp.Q9UPQ3.AGAP1_HUMAN	0.430597	0.190688	0.0824569	-0.271581	0.11262	0.46227	Buffering	Buffering	Buffering	Scaling
AGAP2	0.000447639	-0.514356	0.99449	-0.00163146	0.0226403	-0.512724	sp.Q99490.2.AGAP2_HUMAN	0.127144	-0.576675	0.916068	-0.081462	0.542907	-0.495213	Anti-Scaling	Buffering	Anti-Scaling	Buffering
AGAP3	1.44989e-05	0.73627	0.216216	-0.192254	1.20712e-07	0.928524	sp.Q96P47.4.AGAP3_HUMAN	0.00128565	0.414281	0.533526	-0.0740203	0.000396063	0.488301	Scaling	Buffering	Scaling	Buffering
AGFG1	0.818888	0.0445176	0.0747909	-0.262193	0.146335	0.306711	sp.P52594.4.AGFG1_HUMAN	0.387819	0.153403	0.692318	-0.0426834	0.278112	0.196087	Buffering	Scaling	Buffering	Buffering
AGFG2	0.28999	0.211787	0.0121139	-0.571641	0.000284854	0.783428	sp.O95081.AGFG2_HUMAN	0.718223	-0.0737596	0.061804	-0.824168	0.0888655	0.750408	Buffering	Scaling	Buffering	Scaling
AGGF1	0.592225	0.117542	0.00223506	-0.413057	0.018689	0.530598	sp.Q8N302.AGGF1_HUMAN	0.820528	-0.0324564	0.0381766	-0.284737	0.0348509	0.25228	Buffering	Scaling	Buffering	Scaling
AGK	0.000338081	0.508487	0.0815708	-0.250305	3.85271e-06	0.758792	sp.Q53H12.AGK_HUMAN	0.00231457	0.480172	0.0769722	-0.296111	0.000179616	0.776284	Scaling	Scaling	Scaling	Scaling
AGL	0.152262	0.322711	0.525031	-0.0950785	0.0743461	0.41779	sp.P35573.GDE_HUMAN	0.85501	-0.0446263	0.0109327	-0.350858	0.221556	0.306232	Scaling	Buffering	Buffering	Scaling
[truncated: 8,517 more rows]
