# Supplementary material for: Extensive protein dosage compensation in aneuploid human cancers
Source: HighWire-hosted journal article supplement (doi:10.1101/gr.276378.121), 2022-06-14
Supplement: Supplemental_Table_S13.xlsx [file Supplemental_Table_S13.xlsx]

## Sheet: Legend Table S13
Supplemental Table 13. TCGA ovarian tumor related datasets
1) Ovarian_Info- information about collumn names and meaning in Supplemtal Table 13
2) Ovarian_Difference- An overview of average protein expression difference and percent change upon chromosome gain and loss in control datasets
3) Protein_Gain_ChrmArm - Average difference (log2 fold change) in expression per chromosome arm in cells with a gain or loss for a chromosome arm of interest
4) Ovarian_Buffered_enrichment - g:profiler terms enriched in ovarian tumor proteins or RNA buffered upon chromosome gain or loss
5) ROC_AUC_Ovarian - ROC area under the curves values per potential buffering factor for the ovarian tumor dataset

## Sheet: Ovarian_Info
TCGA ovarian tumor related datasets
Sheet name	Data located in sheet
Ovarian_Difference	An overview of average protein expression difference and percent change upon chromosome gain and loss in control datasets
Protein_Gain_ChrmArm	Average difference (log2 fold change) in expression per chromosome arm in cells with a gain or loss for a chromosome arm of interest
Ovarian_Buffered_enrichment	g:profiler terms enriched in ovarian tumor proteins or RNA buffered upon chromosome gain or loss
ROC_AUC_Ovarian	ROC area under the curves values per potential buffering factor for the ovarian tumor dataset
Column name	Information
Gene	Gene Symbol
RNA.Pvalue.Gain	P-value associated with difference in expression upon chromosome arm gain, for RNA values
RNA.Diff.Gain	Difference in RNA expression (log2 fold change) between cells with a chromosome arm gain vs those with neutral arm ploidy
RNA.CV.Gain	Variance divided by the mean for RNA expression changes upon chromosome gain
RNA.Pvalue.Loss	P-value associated with difference in expression upon chromosome arm loss, for RNA values
RNA.Diff.Loss	Difference in RNA expression (log2 fold change) between cells with a chromosome arm loss vs those with neutral arm ploidy
RNA.CV.Loss	Variance divided by the mean for RNA expression changes upon chromosome loss
RNA.Pvalue.GainvLoss	P-value associated with difference in expression between cells with chromosome arm gain and loss, for RNA values
RNA.Diff.GainvLoss	Difference in RNA expression (log2 fold change) between cells with a chromosome arm gain vs those a chromosome arm loss
X
Protein.Pvalue.Gain	P-value associated with difference in expression upon chromosome arm gain, for Protein values
Protein.Diff.Gain	Difference in Protein expression (log2 fold change) between cells with a chromosome arm gain vs those with neutral arm ploidy
Protein.CV.Gain	Variance divided by the mean for protein expression changes upon chromosome gain
Protein.Pvalue.Loss	P-value associated with difference in expression upon chromosome arm loss, for Protien values
Protein.Diff.Loss	Difference in Protein expression (log2 fold change) between cells with a chromosome arm loss vs those with neutral arm ploidy
Protein.CV.Loss	Variance divided by the mean for protein expression changes upon chromosome loss
Protein.Pvalue.GainvLoss	P-value associated with difference in expression between cells with chromosome arm gain and loss, for Protein values
Protein.Diff.GainvLoss	Difference in Protein expression (log2 fold change) between cells with a chromosome arm gain vs those a chromosome arm loss
Protein.Gain.Difference.Category	Difference category for protein upon chromosome arm gain
Protein.Loss.Difference.Category	Difference category for protein upon chromosome arm loss
RNA.Gain.Difference.Category	Difference category for RNA upon chromosome arm gain
RNA.Loss.Difference.Category	Difference category for RNA upon chromosome arm loss

## Sheet: Ovarian_Difference
	Gene Symbol	RNA.Pvalue.Gain	RNA.Diff.Gain	RNA.CV.Gain	RNA.Pvalue.Loss	RNA.Diff.Loss	RNA.CV.Loss	RNA.Pvalue.GainvLoss	RNA.Diff.GainvLoss	X	Protein.Pvalue.Gain	Protein.Diff.Gain	Protein.CV.Gain	Protein.Pvalue.Loss	Protein.Diff.Loss	Protein.CV.Loss	Protein.Pvalue.GainvLoss	Protein.Diff.GainvLoss	Protein.Gain.Difference.Category	Protein.Loss.Difference.Category	RNA.Gain.Difference.Category	RNA.Loss.Difference.Category
1	A1BG	0.00596219	0.378508	-15.961	0.0169192	-0.257318	-0.848946	1.5017e-05	0.635825	1	0.449743	0.11992	1.81786	0.284558	-0.143451	-3.75963	0.15909	0.263371	Buffering	Buffering	Scaling	Scaling
2	A1BG	0.00596219	0.378508	-15.961	0.0169192	-0.257318	-0.848946	1.5017e-05	0.635825	1	0.449743	0.11992	1.81786	0.284558	-0.143451	-3.75963	0.15909	0.263371	Buffering	Buffering	Scaling	Scaling
3	AAAS	0.00158696	0.213042	-0.554584	0.018603	-0.176686	-0.353353	7.46306e-06	0.389728	4	0.108601	0.0911782	0.75164	0.50495	-0.0344603	-0.758405	0.0618731	0.125638	Buffering	Buffering	Buffering	Buffering
4	AAAS	0.00158696	0.213042	-0.554584	0.018603	-0.176686	-0.353353	7.46306e-06	0.389728	4	0.108601	0.0911782	0.75164	0.50495	-0.0344603	-0.758405	0.0618731	0.125638	Buffering	Buffering	Buffering	Buffering
5	AACS	0.0796205	0.133075	-1.6877	1.48607e-06	-0.40161	-0.45363	1.26002e-07	0.534685	5	0.161726	0.189009	2.25736	0.542659	-0.0631985	-1.52629	0.108673	0.252207	Buffering	Buffering	Buffering	Scaling
6	AACS	0.0796205	0.133075	-1.6877	1.48607e-06	-0.40161	-0.45363	1.26002e-07	0.534685	5	0.161726	0.189009	2.25736	0.542659	-0.0631985	-1.52629	0.108673	0.252207	Buffering	Buffering	Buffering	Scaling
7	AAMP	0.0142545	0.203273	1.30055	3.71107e-05	-0.394406	-0.506556	5.14132e-07	0.597679	9	0.679822	0.0413333	11.4312	0.00965802	-0.16971	-0.136648	0.0609683	0.211043	Buffering	Buffering	Buffering	Scaling
8	AAMP	0.0142545	0.203273	1.30055	3.71107e-05	-0.394406	-0.506556	5.14132e-07	0.597679	9	0.679822	0.0413333	11.4312	0.00965802	-0.16971	-0.136648	0.0609683	0.211043	Buffering	Buffering	Buffering	Scaling
9	AARS2	2.54043e-10	0.303012	2.60163	1.17492e-06	-0.256564	-0.177458	6.47263e-17	0.559576	12	0.00262091	0.182249	0.312524	1.7681e-06	-0.292548	-0.0886737	1.90119e-09	0.474796	Buffering	Scaling	Scaling	Scaling
10	AARS2	2.54043e-10	0.303012	2.60163	1.17492e-06	-0.256564	-0.177458	6.47263e-17	0.559576	12	0.00262091	0.182249	0.312524	1.7681e-06	-0.292548	-0.0886737	1.90119e-09	0.474796	Buffering	Scaling	Scaling	Scaling
11	AASDHPPT	1.10681e-05	0.302364	-1.26134	1.58953e-13	-0.480824	-0.177497	1.34128e-18	0.783188	14	0.00138722	0.263413	0.36038	0.00312406	-0.288547	-0.607273	9.53212e-06	0.55196	Scaling	Scaling	Scaling	Scaling
12	AASDHPPT	1.10681e-05	0.302364	-1.26134	1.58953e-13	-0.480824	-0.177497	1.34128e-18	0.783188	14	0.00138722	0.263413	0.36038	0.00312406	-0.288547	-0.607273	9.53212e-06	0.55196	Scaling	Scaling	Scaling	Scaling
13	ABCB6	0.220613	0.145712	-1.21372	4.33614e-05	-0.538555	-0.290317	3.17541e-05	0.684267	22	0.0943604	0.176329	0.68291	0.0357948	-0.246296	-0.35441	0.00469765	0.422626	Buffering	Buffering	Buffering	Scaling
14	ABCF1	6.52778e-14	0.382856	-1.12982	2.2116e-09	-0.414449	-0.153844	5.38288e-21	0.797305	33	2.60314e-08	0.294033	0.168067	0.000111191	-0.223295	-0.0970933	8.95702e-11	0.517328	Scaling	Buffering	Scaling	Scaling
15	ABI2	0.0129699	0.186356	0.545015	0.00136274	-0.315007	-5.21669	2.43503e-05	0.501363	47	0.174283	0.0890342	0.314712	0.0414636	-0.204985	-0.504977	0.0105323	0.294019	Buffering	Buffering	Buffering	Scaling
16	ACAD10	0.0268879	0.113261	-0.605853	2.11451e-06	-0.257901	-0.224416	1.80034e-08	0.371162	61	0.00740955	0.215277	0.425998	0.245407	-0.106771	-0.804852	0.00128094	0.322048	Buffering	Buffering	Buffering	Scaling
17	ACAD8	0.00617681	0.222683	0.522229	1.59049e-08	-0.345743	0.74476	1.54466e-09	0.568426	63	0.0956162	0.14941	0.919302	0.000589866	-0.229081	-0.180947	0.000128592	0.378491	Buffering	Buffering	Buffering	Scaling
18	ACADS	0.29092	0.093844	-1.15602	0.00102178	-0.240291	-0.332101	0.000999337	0.334135	66	0.104478	0.186714	1.37764	0.000677307	-0.339387	-0.346227	0.00014091	0.526102	Buffering	Scaling	Buffering	Buffering
19	ACAT1	0.00121792	0.297816	-0.472801	4.49846e-06	-0.40727	-0.220911	1.01448e-09	0.705086	72	0.00974724	0.242293	0.512818	8.38642e-05	-0.343415	-0.247742	4.62763e-07	0.585707	Buffering	Scaling	Scaling	Scaling
20	ACO1	0.00053464	0.246136	-0.22088	1.96283e-16	-0.521744	-0.181414	2.00917e-20	0.767879	81	0.0833214	0.119736	0.420679	2.24048e-05	-0.230729	-0.571537	6.81898e-06	0.350466	Buffering	Buffering	Buffering	Scaling
21	ACOX3	0.0125951	0.32312	1.16397	6.38223e-22	-0.621738	-0.507919	3.13831e-09	0.944858	91	0.122638	0.262789	0.798381	4.67456e-05	-0.314988	-0.435939	0.00309552	0.577778	Scaling	Scaling	Scaling	Scaling
22	ACSL3	0.593306	-0.0438701	-0.223959	0.00934219	-0.321809	-0.231771	0.0437151	0.277939	100	0.974215	0.0020503	0.763491	0.852565	-0.0124081	0.957421	0.866233	0.0144584	Buffering	Buffering	Buffering	Scaling
23	ACTN4	0.00167156	0.378834	0.655744	3.69215e-06	-0.391188	164.584	3.40874e-08	0.770022	118	0.283749	0.0832598	0.799611	0.0124734	-0.298049	-0.678177	0.0041685	0.381309	Buffering	Scaling	Scaling	Scaling
24	ACTR1B	0.000255567	0.273597	0.99647	0.633207	-0.0603005	-4.56833	0.020337	0.333897	121	0.0335358	0.179504	0.342911	0.201058	-0.101317	-0.674706	0.0111447	0.280821	Buffering	Buffering	Scaling	Buffering
25	ACTR3	0.636295	-0.0439804	1.15537	0.153268	-0.204605	2.92686	0.323654	0.160625	123	0.300835	-0.0502681	3.20145	0.392484	-0.0462703	2.25848	0.95096	-0.00399779	Buffering	Buffering	Buffering	Buffering
26	ADAMTSL1	0.992153	-0.000896588	-0.502794	0.727887	0.0230106	-0.440631	0.793661	-0.0239072	144	0.688209	-0.0850797	41.8102	0.361857	-0.167977	-8.57364	0.70818	0.0828972	Buffering	Buffering	Buffering	Buffering
27	ADARB1	0.300055	0.0880855	-0.271452	2.19695e-08	-0.371968	-0.211995	3.00686e-06	0.460054	148	0.437891	-0.152096	-6.18581	0.361548	-0.0726572	6.70626	0.689381	-0.0794384	Anti-Scaling	Buffering	Buffering	Scaling
28	ADD1	0.000341419	0.261792	0.250129	3.00215e-16	-0.307623	-0.978747	1.61279e-10	0.569415	152	0.0525777	0.149324	0.291164	0.45804	0.0378944	1.86445	0.155611	0.11143	Buffering	Buffering	Scaling	Scaling
29	AEBP1	0.112426	0.237834	3.75187	0.060426	0.295462	3.45031	0.754504	-0.0576281	181	0.954186	0.00955779	-18.9956	0.368265	0.143839	3.96659	0.497402	-0.134282	Buffering	Anti-Scaling	Buffering	Anti-Scaling
30	AFAP1	0.714952	-0.053402	4.62069	1.73293e-09	-0.498808	-1.64551	0.00339135	0.445406	183	0.597828	-0.0619267	2.47128	0.00586383	-0.212788	-0.900617	0.239416	0.150861	Buffering	Buffering	Buffering	Scaling
31	AFG3L2	0.00431406	0.286623	35.27	1.93064e-12	-0.461002	-0.556877	3.11015e-11	0.747625	189	0.000904617	0.376232	0.408322	3.64721e-06	-0.295429	-0.431326	5.27639e-07	0.671661	Scaling	Scaling	Scaling	Scaling
32	AGPAT1	7.774e-09	0.322547	0.420814	3.72829e-06	-0.312963	-1.11088	1.7399e-14	0.635511	204	0.72201	0.0319795	-14.6245	0.000766593	-0.277366	-0.150713	0.0044687	0.309346	Buffering	Scaling	Scaling	Scaling
33	AGPAT3	0.0148431	0.224343	-3.3337	2.41729e-13	-0.490372	-0.384681	9.97192e-11	0.714715	206	0.590159	0.0463184	1.05859	0.00343141	-0.166736	-0.555797	0.0324347	0.213054	Buffering	Buffering	Buffering	Scaling
34	AGPS	0.863753	-0.0175261	-0.669756	0.142236	-0.238794	-0.757877	0.226911	0.221268	209	0.766936	0.0216218	4.69651	0.38744	0.0846664	1.19409	0.580598	-0.0630445	Buffering	Buffering	Buffering	Buffering
35	AGR2	0.255906	0.257026	-1.51501	7.09726e-07	-0.798154	-0.309659	9.19139e-06	1.05518	210	0.558086	-0.206392	-3.89112	0.133402	-0.311198	-0.980327	0.772777	0.104806	Anti-Scaling	Scaling	Scaling	Scaling
36	AGR3	0.00136259	0.980478	5.343	0.0009428	-0.994722	-4.16832	6.59893e-08	1.9752	211	0.932904	0.0251791	-7.57952	0.017384	-0.500153	-0.669945	0.0943069	0.525332	Buffering	Scaling	Scaling	Scaling
37	AHNAK	0.038166	0.175825	7.13295	9.62127e-07	-0.461076	-0.69207	4.88285e-09	0.6369	222	0.338418	0.074246	1.36664	0.261996	-0.120679	-1.4863	0.0996589	0.194925	Buffering	Buffering	Buffering	Scaling
38	AHR	0.07977	0.207761	1.09663	0.0120137	-0.276604	2.46097	0.000461447	0.484365	224	0.361512	0.0896229	1.20302	0.310027	-0.112552	-2.41884	0.105781	0.202174	Buffering	Buffering	Buffering	Scaling
39	AIF1	0.221171	0.19644	4.56649	0.779183	0.0436261	3.35001	0.389666	0.152814	229	0.955785	-0.00791064	-515.277	0.817379	-0.039235	-10.8358	0.874191	0.0313244	Buffering	Buffering	Buffering	Buffering
40	AIP	0.000973148	0.195281	-1.10845	0.0164643	-0.14552	-0.376616	5.72189e-06	0.340801	236	0.0933504	0.0825065	0.469144	0.00922981	-0.122325	-0.281849	0.00109427	0.204831	Buffering	Buffering	Buffering	Buffering
41	AK3	0.000686382	0.331092	1.08045	8.75516e-18	-0.670058	-0.735838	4.19214e-19	1.00115	240	0.494554	0.0639594	0.980897	5.39938e-10	-0.409303	-0.288904	6.8247e-06	0.473262	Buffering	Scaling	Scaling	Scaling
42	AKT1S1	0.101067	0.156024	-0.560981	3.02229e-05	-0.331261	-0.372216	1.93854e-05	0.487285	264	0.171454	0.0964677	0.36788	0.411428	-0.0765951	-1.74011	0.0768705	0.173063	Buffering	Buffering	Buffering	Scaling
43	AKT2	0.000186624	0.390697	2.10059	6.11205e-05	-0.277825	-0.572128	1.74601e-08	0.668522	265	0.176061	0.0897753	0.389813	0.192593	-0.0820486	-1.27151	0.0264934	0.171824	Buffering	Buffering	Scaling	Scaling
44	ALDH16A1	0.0375617	0.206492	-9.73827	0.296133	-0.100771	-1.75132	0.00929395	0.307263	271	0.295711	0.0641652	0.467883	0.285319	-0.0791569	-1.55655	0.087291	0.143322	Buffering	Buffering	Buffering	Buffering
45	ALDH1B1	0.130502	0.127097	6.0531	1.21608e-13	-0.483599	-0.630921	6.7789e-11	0.610696	276	0.866508	0.0152738	0.950925	2.80789e-05	-0.362408	-1.02999	0.000351541	0.377681	Buffering	Scaling	Buffering	Scaling
46	ALDH2	0.895491	-0.0154557	0.402099	0.0471312	-0.282942	0.73972	0.0932129	0.267486	279	0.669448	0.0474839	3.10562	0.0568723	-0.272641	-1.23175	0.0426121	0.320125	Buffering	Scaling	Buffering	Scaling
47	ALDH3B1	0.488583	-0.0530757	4.71638	7.65137e-06	-0.380164	-1.21379	0.000442265	0.327088	282	0.12211	-0.133812	-3.13504	0.902751	0.0102604	0.876601	0.150766	-0.144072	Anti-Scaling	Buffering	Buffering	Scaling
48	ALDH5A1	0.0286926	0.147945	0.600448	9.74728e-13	-0.63881	-0.787899	2.32594e-15	0.786755	284	0.516539	0.0742605	-6.8678	0.00355527	-0.361581	-0.302638	0.00373639	0.435842	Buffering	Scaling	Buffering	Scaling
49	ALG8	4.22823e-11	0.445961	3.22615	0.936345	-0.0114067	-3.61963	0.00309802	0.457368	300	0.308473	0.0993254	1.18485	0.682138	-0.0749004	-6.30695	0.356089	0.174226	Buffering	Buffering	Scaling	Buffering
50	ALG9	2.181e-10	0.330719	-0.744056	3.96798e-08	-0.324599	-0.202959	7.11489e-19	0.655318	301	0.147204	0.111787	0.598113	0.653666	-0.0318665	4.06591	0.123962	0.143654	Buffering	Buffering	Scaling	Scaling
51	ANAPC1	0.000576095	0.183636	-1.6989	0.000105911	-0.392862	-0.347263	4.0926e-07	0.576499	329	0.952359	0.00398024	0.903613	0.892722	0.00613823	0.276035	0.977095	-0.00215799	Buffering	Buffering	Buffering	Scaling
52	ANAPC4	0.117223	0.10942	1.45825	1.46368e-20	-0.445906	-0.385102	1.68423e-10	0.555326	332	0.409698	0.0872083	0.377182	0.798047	-0.0163233	0.7723	0.328569	0.103532	Buffering	Buffering	Buffering	Scaling
53	ANAPC5	1.36195e-05	0.214757	1.31198	5.44153e-17	-0.432343	-0.172014	6.69536e-22	0.6471	333	0.563297	0.0325414	1.38629	0.260979	-0.0502529	-0.580297	0.17366	0.0827943	Buffering	Buffering	Buffering	Scaling
54	ANAPC7	0.0122197	0.172908	-4.99584	2.05873e-11	-0.524271	-0.342646	2.66561e-13	0.697179	334	0.192224	0.0601742	0.239042	0.776516	-0.0146709	0.735445	0.196662	0.0748451	Buffering	Buffering	Buffering	Scaling
55	ANKMY2	3.74555e-05	0.352317	13.0091	3.67113e-06	-0.369932	-0.456382	5.97343e-12	0.722249	348	0.0510357	0.144037	0.363755	0.028854	-0.158866	-1.11134	0.000945199	0.302903	Buffering	Buffering	Scaling	Scaling
56	ANKRD13A	0.00144533	0.272575	1.27558	9.78748e-05	-0.324943	-1.03195	1.76763e-08	0.597517	351	0.946919	0.00542514	5.96086	0.0833576	-0.150857	-0.813592	0.136663	0.156282	Buffering	Buffering	Scaling	Scaling
57	ANKRD44	0.145952	-0.119735	-0.416174	0.110471	0.195616	-1.04564	0.0232132	-0.315351	358	0.0700228	-0.180496	-0.482975	0.133725	0.135886	0.486874	0.0121336	-0.316383	Anti-Scaling	Anti-Scaling	Anti-Scaling	Anti-Scaling
58	ANKS1A	1.238e-10	0.422038	0.413905	0.00385265	-0.220582	7.5896	8.63461e-12	0.64262	365	0.000253971	0.214393	0.319744	0.152763	-0.123892	-0.565592	0.00111223	0.338285	Buffering	Buffering	Scaling	Buffering
59	ANLN	0.524825	0.0656315	-0.396389	0.000368985	-0.383958	-0.307267	0.000497665	0.449589	367	0.87103	0.0206576	301.253	0.0494486	-0.196618	-0.344051	0.0747512	0.217275	Buffering	Buffering	Buffering	Scaling
60	AP2A1	0.682614	0.0357098	-0.756874	0.000836093	-0.226478	-0.442243	0.00807244	0.262188	399	0.17357	0.0690858	0.165054	1.28477e-05	-0.237511	-0.244567	6.36624e-06	0.306597	Buffering	Buffering	Buffering	Buffering
61	AP2S1	0.00578382	0.236457	-1.16264	7.80935e-13	-0.473247	-0.239028	9.27494e-12	0.709705	403	0.160622	0.0847633	0.25519	0.0519873	-0.1303	-1.33986	0.0068235	0.215064	Buffering	Buffering	Buffering	Scaling
62	APAF1	0.0437744	0.190236	-1.74006	4.98419e-07	-0.565844	-0.562139	2.99144e-09	0.75608	416	0.319146	0.0667791	0.476481	0.00568908	-0.155529	-0.323002	0.00116553	0.222308	Buffering	Buffering	Buffering	Scaling
63	APLP2	0.00224961	0.290795	0.979094	8.02114e-08	-0.426563	-1.84449	3.23405e-10	0.717358	427	0.358475	0.114227	1.91221	0.504417	-0.0723657	-4.54613	0.208478	0.186593	Buffering	Buffering	Scaling	Scaling
64	APOA1	0.0280456	0.441437	-1.17122	0.430253	0.15361	-0.892227	0.242117	0.287827	429	0.437403	-0.0981802	-4.25589	0.509063	-0.102691	-5.77623	0.978983	0.00451076	Buffering	Buffering	Scaling	Anti-Scaling
65	APOA4	0.0889858	0.115893	-0.209931	0.464408	0.0426244	-0.127503	0.366394	0.0732685	431	0.133568	-0.192564	-1.43801	0.995078	-0.000989131	62.1931	0.287945	-0.191575	Anti-Scaling	Buffering	Buffering	Buffering
66	APOC1	0.272179	0.216112	-4.32216	0.386839	-0.142378	-2.37635	0.097393	0.358491	438	0.911892	0.0254571	12.741	0.864506	-0.0378165	-152.258	0.823792	0.0632736	Buffering	Buffering	Buffering	Buffering
67	APOC2	0.685216	0.0591288	-0.413277	0.812157	0.0278182	-0.448631	0.845831	0.0313106	439	0.589305	0.0986013	2.85176	0.402613	-0.163316	-4.28613	0.25289	0.261917	Buffering	Buffering	Buffering	Buffering
68	APOC3	0.0221498	0.208652	-0.121058	0.348207	0.0952496	-0.145358	0.347763	0.113402	440	0.583323	0.0748669	2.75107	0.569657	-0.0978914	-7.46426	0.36804	0.172758	Buffering	Buffering	Buffering	Buffering
69	APOE	0.0960941	0.202795	1.08112	0.594531	0.0606535	2.73309	0.30693	0.142142	443	0.167406	0.192704	2.12648	0.680936	-0.0731122	-2.53564	0.166892	0.265816	Buffering	Buffering	Buffering	Buffering
70	APOM	0.983465	-0.00159194	-0.127308	0.0217067	-0.22568	-0.103257	0.0398739	0.224088	449	0.553906	0.0624799	1.40712	0.0512004	-0.253668	-0.676794	0.0177397	0.316148	Buffering	Scaling	Buffering	Buffering
71	APP	0.194211	0.202937	0.58034	9.61275e-05	-0.373752	0.563255	0.000763637	0.57669	452	0.686761	0.0507316	-3.82821	0.0265059	-0.181386	-0.437223	0.07952	0.232118	Buffering	Buffering	Buffering	Scaling
72	APPL2	4.63137e-07	0.340497	0.48901	1.06266e-07	-0.400429	-0.872804	3.58483e-15	0.740926	455	0.0128384	0.158032	0.289257	0.00752381	-0.145075	-0.501032	6.93918e-05	0.303107	Buffering	Buffering	Scaling	Scaling
73	APTX	4.65172e-11	0.39674	0.347221	7.26707e-29	-0.495751	-0.323159	6.97191e-32	0.892491	457	0.0120848	0.242021	0.42325	0.0841398	-0.134138	-0.39973	3.46199e-05	0.376159	Buffering	Buffering	Scaling	Scaling
74	ARCN1	4.12482e-08	0.3543	-1.52663	0.000144203	-0.185047	-0.165637	5.95059e-13	0.539347	465	0.00124142	0.111257	0.106497	0.0999057	-0.0782033	-1.37817	0.000624213	0.18946	Buffering	Buffering	Scaling	Buffering
75	ARF3	0.000170778	0.228773	0.311506	1.8783e-09	-0.40132	-11.1864	5.23461e-14	0.630093	467	0.872038	0.00722456	1.6528	0.282307	0.0419305	0.358377	0.483331	-0.0347059	Buffering	Buffering	Buffering	Scaling
76	ARHGEF1	0.00843154	0.23322	-0.942252	0.0833581	-0.114649	-0.466047	0.000666144	0.347868	508	0.097591	0.0929627	0.303869	0.893934	0.0135016	3.18483	0.465683	0.0794612	Buffering	Buffering	Buffering	Buffering
77	ARHGEF12	8.7423e-05	0.206914	0.228402	4.12359e-14	-0.352243	0.750627	5.14814e-18	0.559157	512	0.000359503	0.153656	0.174508	0.240564	-0.0551616	-0.383523	0.000227567	0.208817	Buffering	Buffering	Buffering	Scaling
78	ARHGEF17	0.00165082	0.215638	0.261189	0.731372	0.0228717	0.289926	0.0224645	0.192766	514	0.11382	0.0670963	0.328825	0.421123	0.0565211	1.1593	0.883993	0.0105752	Buffering	Buffering	Buffering	Buffering
79	ARID2	3.38357e-06	0.403471	-2.69909	1.7112e-07	-0.544564	-0.479539	1.30424e-13	0.948035	526	0.0204036	0.185875	0.513789	0.0238759	-0.179103	-0.576403	0.000464642	0.364978	Buffering	Buffering	Scaling	Scaling
80	ARL1	4.68628e-07	0.305602	0.309408	3.02844e-06	-0.287817	-8.12253	9.56936e-14	0.593419	533	0.0871047	0.118388	0.446791	0.202423	0.0771747	0.354913	0.588682	0.0412131	Buffering	Buffering	Scaling	Scaling
81	ARL2	0.0380542	0.154365	-0.429732	0.416958	-0.058558	-0.288687	0.018566	0.212923	537	0.060914	0.138825	0.651005	0.593764	-0.0401832	-3.09042	0.0608189	0.179008	Buffering	Buffering	Buffering	Buffering
82	ARL6IP4	0.0256512	0.128689	0.293255	4.86899e-12	-0.380521	1.19828	1.57574e-12	0.50921	545	0.573567	-0.0282428	0.848278	0.0191705	-0.114277	-0.756918	0.127695	0.0860338	Buffering	Buffering	Buffering	Scaling
83	ARMC9	0.177897	0.113321	3.39995	0.00266801	-0.33381	-0.798757	0.000579763	0.447131	554	0.947334	0.00656188	-17.9806	0.654249	-0.0577165	-2.25196	0.673019	0.0642784	Buffering	Buffering	Buffering	Scaling
84	ARPC2	0.0593459	0.112787	0.300166	5.17713e-06	-0.380101	4.22144	3.11109e-07	0.492889	563	0.961975	-0.00249588	0.345364	0.376737	-0.0591013	1.54329	0.470152	0.0566054	Buffering	Buffering	Buffering	Scaling
85	ARPC3	0.0125175	0.151396	0.33603	9.11796e-10	-0.358863	1.51915	4.42972e-11	0.510259	564	0.029633	-0.125041	-0.94384	0.169603	0.0751244	0.342938	0.00553983	-0.200165	Anti-Scaling	Buffering	Buffering	Scaling
86	ARRB1	0.00930156	0.224866	-0.362219	0.837626	-0.0208742	-0.431759	0.0382134	0.24574	570	0.950581	-0.00523977	1.44665	0.00686731	-0.185808	-0.668685	0.0582025	0.180568	Buffering	Buffering	Buffering	Buffering
87	ASRGL1	0.110468	0.246762	0.742397	4.79848e-09	-0.974819	2.30807	7.45976e-10	1.22158	602	0.988124	-0.00268874	-2.2075	0.000282345	-0.598276	-0.318272	0.00288043	0.595587	Buffering	Scaling	Buffering	Scaling
88	ATF1	0.000102589	0.275029	1.39758	1.34813e-05	-0.362884	-0.7284	1.77569e-10	0.637914	611	0.0110327	0.19349	0.589145	0.354778	-0.0628943	-0.746119	0.00449406	0.256385	Buffering	Buffering	Scaling	Scaling
89	ATF2	0.000386007	0.24209	1.77271	0.0035037	-0.337153	-0.705285	1.6294e-05	0.579243	612	0.0130596	0.283043	0.458838	0.199966	-0.123222	-0.427729	0.00470258	0.406265	Scaling	Buffering	Buffering	Scaling
90	ATG16L1	1.75786e-07	0.378197	0.230629	0.000632682	-0.259195	0.579448	5.21783e-10	0.637392	619	0.106716	0.156724	0.689909	0.590153	0.0589309	4.14819	0.46173	0.0977926	Buffering	Buffering	Scaling	Scaling
91	ATG2A	0.000639612	0.238407	-0.515371	0.0698797	-0.125448	-0.28638	2.97257e-05	0.363854	620	0.963084	0.00392492	4.17174	0.698978	0.0336068	1.49737	0.784656	-0.0296819	Buffering	Buffering	Buffering	Buffering
92	ATG4B	2.76244e-05	0.259415	-0.756831	0.000848641	-0.21386	-0.132137	2.74697e-08	0.473275	624	0.178773	0.137981	1.01038	0.653455	-0.0372382	-0.796794	0.142414	0.175219	Buffering	Buffering	Scaling	Buffering
93	ATG9A	3.25612e-05	0.302771	-0.614247	6.6971e-05	-0.296794	-0.118924	1.87187e-09	0.599565	628	0.674997	0.0451488	13.4594	0.322168	-0.11246	-0.739028	0.292057	0.157609	Buffering	Buffering	Scaling	Scaling
94	ATIC	0.000313988	0.276314	-0.735224	1.43043e-06	-0.458171	-0.158021	4.33781e-10	0.734485	629	0.102878	0.180514	0.973497	0.000209481	-0.262036	-0.0846349	0.000984964	0.44255	Buffering	Scaling	Scaling	Scaling
95	ATM	2.90415e-05	0.339149	-0.840588	0.000828941	-0.264	-0.300742	1.69752e-09	0.603149	633	0.00156309	0.212189	0.30485	0.034344	-0.112517	-0.470657	4.08766e-05	0.324706	Buffering	Buffering	Scaling	Scaling
96	ATP2A2	0.0251609	0.116677	1.2011	8.85819e-10	-0.323091	-0.369988	5.87993e-11	0.439768	646	0.954144	-0.00243375	0.351041	7.15508e-06	-0.225719	-0.190849	5.33898e-05	0.223285	Buffering	Buffering	Buffering	Scaling
97	ATP2B1	0.00927645	0.228054	0.657099	5.89457e-08	-0.588014	-2.4807	1.32994e-10	0.816068	648	0.424751	0.0430631	0.63806	0.00660036	-0.176666	-0.493692	0.00481714	0.219729	Buffering	Buffering	Buffering	Scaling
98	ATP5B	0.176233	0.1245	-0.843536	3.16332e-06	-0.509477	-0.49395	8.44456e-07	0.633977	653	0.518853	-0.0415899	-3.86914	0.141976	-0.0848516	-0.767075	0.562038	0.0432617	Buffering	Buffering	Buffering	Scaling
99	ATP5I	0.00218187	0.273484	0.115665	4.52331e-23	-0.615789	0.593016	3.34351e-14	0.889273	659	0.280814	0.0912881	0.351678	0.109203	-0.0693317	2.6588	0.0674418	0.16062	Buffering	Buffering	Scaling	Scaling
100	ATP5J	0.00412027	0.216001	0.596797	7.49577e-14	-0.527056	-1.0219	6.75523e-14	0.743058	660	0.01197	-0.163875	-0.662488	0.00914944	-0.198304	-1.67153	0.673755	0.0344287	Anti-Scaling	Buffering	Buffering	Scaling
101	ATP5L	9.88954e-06	0.303711	0.309047	1.75496e-13	-0.528849	9.14337	5.12057e-19	0.83256	662	0.282671	-0.0672586	-14.0953	0.14116	-0.0866139	-1.9322	0.789123	0.0193553	Buffering	Buffering	Scaling	Scaling
102	ATP5O	8.49837e-05	0.290398	0.620078	5.00952e-12	-0.41755	-0.724534	1.98228e-14	0.707949	663	0.148399	-0.085076	-2.26737	0.0274396	-0.125179	-1.35889	0.54866	0.0401029	Buffering	Buffering	Scaling	Scaling
103	ATP6V0A2	0.0376314	0.155727	0.908633	0.0662391	-0.145653	-152.597	0.00123283	0.30138	669	0.851927	0.0138725	3.06894	0.47466	0.0470632	0.927512	0.703376	-0.0331907	Buffering	Buffering	Buffering	Buffering
104	ATXN2	3.33434e-05	0.223197	6.41246	8.2205e-12	-0.400073	-0.233483	3.20244e-17	0.62327	697	0.270995	0.0538937	0.306532	0.0225799	-0.143164	-0.792839	0.00579063	0.197057	Buffering	Buffering	Buffering	Scaling
105	B3GAT3	0.00617341	0.142449	-0.706917	0.000425997	-0.198774	-0.288352	2.49637e-07	0.341223	714	0.0933525	0.136934	1.37439	0.568078	0.0500023	-8.20774	0.411347	0.0869318	Buffering	Buffering	Buffering	Buffering
106	BAD	0.0728804	0.112086	0.239903	5.19464e-06	-0.313647	0.493297	1.88368e-07	0.425733	727	0.968443	-0.0031448	15.4778	0.0243259	-0.224935	-0.687858	0.0512675	0.22179	Buffering	Buffering	Buffering	Scaling
107	BAG1	0.0691559	0.153669	0.856374	3.54533e-20	-0.613974	-1.12569	1.07783e-14	0.767642	728	0.066099	0.170918	1.07915	1.75163e-06	-0.272758	-0.273266	1.88191e-05	0.443676	Buffering	Scaling	Buffering	Scaling
108	BAG2	0.11722	0.222548	-0.954189	0.000107068	-0.713253	-0.499878	2.32408e-06	0.9358	729	0.725549	-0.0513	-15.8777	0.3016	-0.132377	-1.569	0.635468	0.0810765	Buffering	Buffering	Buffering	Scaling
109	BANF1	0.022246	0.167668	0.601457	0.000172111	-0.271148	3.32955	1.66631e-06	0.438817	737	0.840255	0.0175134	3.53514	0.00668244	-0.265713	-0.572582	0.0175686	0.283226	Buffering	Scaling	Buffering	Scaling
110	BASP1	0.0730806	0.199201	-0.762558	0.316156	0.174301	-0.512181	0.888905	0.0248994	740	0.202394	0.163299	7.55369	0.672715	0.0805296	-23.9139	0.681089	0.0827696	Buffering	Buffering	Buffering	Anti-Scaling
111	BAX	0.197751	0.111947	13.6813	0.00174033	-0.229751	-0.916004	0.000434065	0.341698	741	0.138093	0.103964	0.305367	0.0101803	-0.141564	-1.53907	0.00273944	0.245528	Buffering	Buffering	Buffering	Buffering
112	BBS1	0.748601	0.0242374	0.30914	2.84109e-05	-0.282024	0.264655	0.00047553	0.306261	746	0.717681	0.0334307	-7.88288	0.0685197	0.199352	0.62574	0.171237	-0.165921	Buffering	Anti-Scaling	Buffering	Scaling
113	BCAM	0.0191911	0.226398	0.150045	0.0425777	-0.177396	0.295631	0.000325072	0.403794	751	0.405931	0.0936319	0.884245	0.000506392	-0.656984	-0.622326	0.000124278	0.750616	Buffering	Scaling	Buffering	Buffering
114	BCAT2	0.0354727	0.180241	0.854319	3.9492e-12	-0.433419	-0.61363	1.1738e-09	0.61366	759	0.0182325	0.217325	0.344324	0.0702421	-0.191358	-1.08294	0.00119047	0.408683	Buffering	Buffering	Buffering	Scaling
115	BCKDHA	0.000625336	0.271211	0.369035	1.66408e-13	-0.491788	-1.1569	2.70633e-14	0.762999	762	0.37651	0.0734044	1.39873	0.919776	-0.00767225	-6.30592	0.416282	0.0810766	Buffering	Buffering	Scaling	Scaling
116	BCL9L	6.18075e-07	0.328916	-2.3567	0.00170229	-0.200621	-0.327981	1.12686e-10	0.529537	776	0.439461	0.0510071	1.43983	0.905571	0.00702619	11.4337	0.57735	0.0439809	Buffering	Buffering	Scaling	Buffering
117	BCS1L	0.000132155	0.274854	1.09839	1.83734e-05	-0.396457	-0.371089	4.54182e-09	0.67131	780	0.0988791	0.186946	0.90105	0.023473	-0.276889	-0.363174	0.00393593	0.463835	Buffering	Scaling	Scaling	Scaling
118	BIN1	0.00442107	0.291323	0.424892	0.000520089	-0.449323	1.19478	2.59111e-06	0.740646	793	0.0499626	0.193015	0.373977	0.000412963	-0.428875	-0.212698	3.39898e-05	0.621889	Buffering	Scaling	Scaling	Scaling
119	BIN2	0.038491	-0.233168	-0.770859	0.163206	0.156284	-1.27051	0.00640006	-0.389453	794	0.948815	-0.00712499	18.2142	0.371325	0.0958556	1.734	0.472846	-0.102981	Buffering	Buffering	Anti-Scaling	Anti-Scaling
120	BIRC2	0.000142505	0.227303	-4.34049	4.25751e-11	-0.433265	-0.277156	1.03756e-15	0.660567	796	0.787898	0.0172671	0.786177	0.611825	-0.0399441	7.05497	0.515224	0.0572112	Buffering	Buffering	Buffering	Scaling
121	BLOC1S1	0.0371862	0.165785	0.270202	0.00516507	-0.24043	0.43999	0.000134357	0.406215	801	0.283092	-0.0707018	12.1819	0.399422	-0.0601241	4.99088	0.902916	-0.0105777	Buffering	Buffering	Buffering	Buffering
122	BLVRA	0.451362	0.0637564	-0.660905	2.73483e-08	-0.466141	-0.288553	4.03661e-07	0.529898	807	0.778103	0.0156286	0.470887	0.00221786	-0.188323	-0.491948	0.00286344	0.203951	Buffering	Buffering	Buffering	Scaling
123	BLVRB	0.38466	0.102102	-0.810786	6.85001e-10	-0.513629	-0.284717	3.82451e-06	0.615731	808	0.562125	0.0567579	1.3524	0.390667	-0.144254	-3.44494	0.252342	0.201012	Buffering	Buffering	Buffering	Scaling
124	BPHL	2.58045e-09	0.433221	0.626947	1.28792e-06	-0.425974	-0.771841	9.84808e-16	0.859195	829	0.000643666	0.293802	0.787136	0.115956	-0.135344	-0.261363	6.42527e-05	0.429146	Scaling	Buffering	Scaling	Scaling
125	BRAP	8.55061e-05	0.265023	0.504087	1.94028e-06	-0.2939	-1.04705	1.80095e-12	0.558922	835	0.0142245	0.11133	0.178186	0.000349712	-0.227834	-0.257123	2.0755e-06	0.339164	Buffering	Buffering	Scaling	Scaling
126	BRD2	7.70106e-06	0.267477	-1.01571	3.32558e-07	-0.369738	-0.185669	4.45947e-14	0.637215	841	0.179774	0.0682784	0.841653	0.589857	0.0367487	1.69779	0.682014	0.0315297	Buffering	Buffering	Scaling	Scaling
127	BRI3BP	0.538222	-0.0491538	-1.25377	0.0026892	-0.232322	-0.629727	0.0606982	0.183168	849	0.163187	-0.124117	-1.37916	0.278592	-0.127673	-2.37889	0.977849	0.00355671	Anti-Scaling	Buffering	Buffering	Buffering
128	BST1	0.879459	0.0345764	0.676112	2.26097e-05	-0.551882	1.05458	0.0116833	0.586458	862	0.346562	-0.18292	-2.97737	0.0635922	-0.16037	-2.33114	0.908008	-0.0225503	Anti-Scaling	Buffering	Buffering	Scaling
129	BTN2A1	0.000749497	0.193512	3.83505	2.10381e-09	-0.427074	-0.27242	1.1341e-13	0.620586	871	0.685892	-0.0511361	2.03199	0.00117486	-0.479417	-0.27609	0.00559553	0.428281	Buffering	Scaling	Buffering	Scaling
130	BTN3A3	0.0793009	0.175725	0.58857	0.00126549	-0.343428	0.54618	3.12231e-05	0.519154	873	0.0322394	0.171528	0.821151	0.117754	-0.13322	-0.407424	0.0021178	0.304748	Buffering	Buffering	Buffering	Scaling
131	BUD13	3.37602e-05	0.271028	1.13883	3.03849e-06	-0.2929	-0.561394	1.51615e-11	0.563928	876	0.139324	0.115199	0.51153	0.0938121	-0.109404	-0.820618	0.0127656	0.224603	Buffering	Buffering	Scaling	Scaling
132	BYSL	6.90279e-15	0.411845	-0.959857	4.7407e-16	-0.586405	-0.106138	5.35097e-29	0.998249	879	0.55118	0.0305651	0.769305	0.0204321	-0.303132	-0.705047	0.0127632	0.333698	Buffering	Scaling	Scaling	Scaling
133	BZW1	0.567013	0.049912	-0.354843	0.116139	-0.225007	-0.434837	0.0882197	0.274919	880	0.452631	0.0702499	0.851661	0.0676405	-0.129948	-0.486486	0.0743984	0.200197	Buffering	Buffering	Buffering	Buffering
134	BZW2	0.000528917	0.247144	-4.90227	2.0694e-11	-0.580904	-0.414393	1.45093e-15	0.828048	881	0.841683	0.0119665	0.485178	0.000816547	-0.29546	-0.648651	0.00110824	0.307427	Buffering	Scaling	Buffering	Scaling
135	C11orf54	4.7004e-05	0.327198	0.390417	3.66214e-09	-0.473095	3.19403	8.3931e-15	0.800293	884	0.179222	0.149965	1.42238	0.0463231	-0.255059	-1.1148	0.0111753	0.405023	Buffering	Scaling	Scaling	Scaling
136	C11orf68	0.000640439	0.167092	-0.626888	0.000188539	-0.193537	-0.238491	1.21306e-08	0.360629	887	0.00667606	0.159346	0.341208	0.62796	-0.0451591	-2.75216	0.0487354	0.204505	Buffering	Buffering	Buffering	Buffering
137	C12orf10	0.00601444	0.194835	1.04865	3.6713e-05	-0.291132	-1.01401	7.0395e-08	0.485967	890	0.00194736	0.258754	0.479148	0.00010573	-0.255476	-0.19659	5.16269e-07	0.51423	Scaling	Scaling	Buffering	Scaling
138	C12orf43	0.37183	0.045826	1.28518	2.71982e-12	-0.444574	-0.450658	3.24178e-11	0.4904	893	0.969616	-0.00219119	0.522587	0.0293343	-0.201567	-0.754081	0.034646	0.199376	Buffering	Buffering	Buffering	Scaling
139	C19orf47	1.1912e-06	0.495878	5.89508	0.00427496	-0.220033	-0.543649	7.16679e-10	0.715911	921	0.613959	0.0857657	1.8517	0.452001	-0.127392	-2.2656	0.293423	0.213158	Buffering	Buffering	Scaling	Buffering
140	C1QTNF5	0.233559	0.145745	0.373669	0.6151	0.0611087	0.353434	0.56911	0.0846368	946	0.251148	-0.269584	-2.08554	0.190193	0.268896	1.51759	0.0561922	-0.53848	Anti-Scaling	Anti-Scaling	Buffering	Buffering
141	C2	0.469748	0.0919533	1.33774	0.00319696	-0.460893	2.78562	0.00167878	0.552846	950	0.44045	-0.0650605	4.06105	0.0746362	-0.243361	-1.57332	0.21967	0.178301	Buffering	Buffering	Buffering	Scaling
142	C21orf33	0.000137209	0.285483	0.328229	2.51225e-11	-0.382405	-6.94099	2.40917e-13	0.667889	954	0.634867	0.0407513	1.11768	9.64717e-05	-0.244392	-0.319493	0.00326111	0.285143	Buffering	Buffering	Scaling	Scaling
143	C21orf59	1.34064e-05	0.419026	0.696681	7.99816e-18	-0.499099	-0.49883	3.08905e-15	0.918125	955	0.112679	0.168098	0.552468	4.66609e-06	-0.281102	-0.176893	0.000327261	0.4492	Buffering	Scaling	Scaling	Scaling
144	C5orf22	5.8141e-12	0.3694	0.671094	0.00253094	-0.261772	-1.43621	8.56723e-10	0.631172	975	0.000791045	0.290715	1.23071	0.414844	-0.142775	-1.02636	0.0299444	0.43349	Scaling	Buffering	Scaling	Scaling
145	C6	0.933405	-0.0103042	1.13203	0.57291	-0.111517	1.07191	0.602685	0.101213	979	0.0255062	0.223783	3.39081	0.695373	0.0664177	-6.04647	0.39578	0.157365	Buffering	Buffering	Buffering	Buffering
146	C7	0.344607	0.172744	0.999509	0.0222058	0.724944	0.791282	0.0776568	-0.5522	984	0.0309885	0.247885	5.1998	0.978571	0.00503469	-1.95649	0.225824	0.242851	Buffering	Buffering	Buffering	Anti-Scaling
147	C7orf26	9.39394e-05	0.233727	0.370274	2.40933e-14	-0.45871	-1.23925	1.88782e-18	0.692437	986	0.103219	-0.143558	-7.42584	0.425122	-0.0664178	1.00861	0.42769	-0.0771407	Anti-Scaling	Buffering	Buffering	Scaling
148	C7orf50	0.0003678	0.273142	-1.08391	5.19639e-10	-0.513943	-0.295585	5.47703e-15	0.787086	988	0.648502	-0.0306028	1.47206	0.0237822	-0.156653	-0.846343	0.118809	0.126051	Buffering	Buffering	Scaling	Scaling
149	C9	0.12169	0.047914	-20.9648	0.0490452	-0.150294	-0.917276	0.0104693	0.198208	998	0.0239685	0.223206	2.96573	0.933014	-0.0172802	-3.48162	0.276112	0.240486	Buffering	Buffering	Buffering	Buffering
150	CA9	0.329014	-0.181606	-0.910451	1.98617e-07	-0.701278	-0.494823	0.00395404	0.519672	1011	0.430301	-0.159358	-2.82001	0.302109	-0.208802	-2.79116	0.831011	0.0494437	Anti-Scaling	Buffering	Anti-Scaling	Scaling
151	CAB39	0.436401	0.0626286	1.93723	0.000364098	-0.435169	-0.951817	0.000270144	0.497798	1013	0.976655	-0.00165612	0.411236	0.00156658	-0.230369	-0.210816	0.00501323	0.228713	Buffering	Buffering	Buffering	Scaling
152	CADM1	0.567937	-0.0925376	6.22789	0.000415798	-0.505454	-6.82426	0.0304745	0.412916	1024	0.433896	0.094263	1.95554	0.041526	-0.220108	-0.787438	0.0233767	0.314371	Buffering	Buffering	Buffering	Scaling
153	CADM4	0.431155	0.0632779	0.378844	4.73191e-05	-0.317187	2.21198	6.85729e-05	0.380465	1026	0.121819	0.224972	1.57356	0.444928	0.13442	13.7075	0.639187	0.0905521	Buffering	Anti-Scaling	Buffering	Scaling
154	CALCOCO1	0.00139794	0.216311	0.315332	0.0078889	-0.181873	0.746723	1.36982e-06	0.398184	1032	0.228144	-0.163538	-2.84831	0.0989211	-0.184696	-0.741201	0.871328	0.0211579	Anti-Scaling	Buffering	Buffering	Buffering
155	CAMKK2	3.6527e-05	0.223599	0.26978	1.50312e-06	-0.321554	-10.4247	6.96404e-12	0.545153	1048	0.153278	0.0918766	0.520834	0.000411765	-0.198606	-0.156501	0.000142234	0.290483	Buffering	Buffering	Buffering	Scaling
156	CAND1	0.00218675	0.250203	4.46504	1.96067e-06	-0.450374	-0.669869	5.4796e-10	0.700577	1054	0.00570215	0.134674	0.243758	8.35215e-08	-0.227053	-0.0911033	1.15093e-08	0.361727	Buffering	Buffering	Scaling	Scaling
157	CAP2	0.000568548	0.316804	1.81577	3.29316e-05	-0.494591	-0.953304	2.15227e-09	0.811395	1059	0.971812	0.00262325	-825.2	0.487008	-0.0708491	-1.69442	0.509514	0.0734724	Buffering	Buffering	Scaling	Scaling
158	CAPN1	0.0275667	0.17715	59.7661	2.50987e-05	-0.379057	-0.713785	1.14621e-07	0.556207	1061	0.685708	0.0275033	1.60245	0.00149499	-0.229676	-0.338624	0.00391523	0.257179	Buffering	Buffering	Buffering	Scaling
159	CAPN5	0.002534	0.184304	0.49735	0.740134	0.0262966	1.41583	0.0844609	0.158007	1064	0.565298	0.087518	5.18894	0.698713	-0.0601832	-5.82525	0.461563	0.147701	Buffering	Buffering	Buffering	Buffering
160	CAPNS1	0.0899129	0.147979	-3.89128	1.31342e-05	-0.339605	-0.710484	6.6766e-06	0.487584	1066	0.109339	-0.158127	-1.50381	0.000456673	-0.288089	-0.2973	0.216002	0.129962	Anti-Scaling	Scaling	Buffering	Scaling
161	CASP1	0.090798	0.257461	1.26786	0.0129603	-0.416027	5.03808	0.00051008	0.673487	1088	0.895629	0.0132015	-16.8059	0.203067	-0.130317	-1.02886	0.26145	0.143518	Buffering	Buffering	Scaling	Scaling
162	CASP10	0.589705	-0.0682563	1.44363	0.00117609	-0.492672	4.95849	0.0203939	0.424416	1089	0.586105	-0.0534196	-0.980707	0.183431	-0.230049	-1.0237	0.32648	0.17663	Buffering	Buffering	Buffering	Scaling
163	CASP4	0.000129113	0.375042	0.4956	1.01313e-05	-0.428519	2.2672	2.823e-11	0.803561	1093	0.104252	0.120273	0.775327	0.00686375	-0.189287	-0.307229	0.000689708	0.30956	Buffering	Buffering	Scaling	Scaling
164	CASP8	0.0171685	0.195431	-17.9968	0.00266924	-0.35944	-0.592935	6.90095e-05	0.554871	1096	0.355786	0.0905352	2.18687	0.854135	-0.0144108	-0.967569	0.369252	0.104946	Buffering	Buffering	Buffering	Scaling
165	CBL	8.37189e-07	0.307662	0.933464	0.00350573	-0.161506	-0.639977	4.75514e-10	0.469168	1111	0.0407271	0.093757	0.131742	0.560227	-0.0511497	-6.35625	0.0976693	0.144907	Buffering	Buffering	Scaling	Buffering
166	CBR1	0.00216144	0.244945	0.465997	5.1951e-09	-0.459012	-2.39489	1.0101e-11	0.703956	1115	0.450785	0.0639662	1.56714	0.00313657	-0.167218	-0.416197	0.0174444	0.231185	Buffering	Buffering	Buffering	Scaling
167	CBR3	0.721793	-0.0781468	-2.46206	9.10047e-07	-0.784093	-1.2664	0.00396678	0.705947	1116	0.960214	0.00456936	-4.14154	0.00140528	-0.184766	-0.268973	0.0508719	0.189336	Buffering	Buffering	Buffering	Scaling
168	CBS	0.151787	0.210335	-1.72158	0.00440683	-0.259984	-0.63534	0.00314697	0.470319	1118	0.480008	0.185829	-4.72777	0.0888642	-0.226453	-0.585898	0.134385	0.412281	Buffering	Buffering	Buffering	Scaling
169	CBWD1	0.00518248	0.262405	-5.02748	5.25833e-06	-0.328044	-0.622535	3.31883e-09	0.590449	1119	0.154485	0.119088	0.7529	0.399876	-0.0672962	-2.44663	0.0317917	0.186384	Buffering	Buffering	Scaling	Scaling
170	CBX3	0.000128337	0.26787	-5.61302	7.17796e-10	-0.387413	-0.266171	5.4443e-14	0.655283	1122	0.363871	0.0561925	0.942745	0.0942539	-0.109528	-0.716395	0.0329428	0.165721	Buffering	Buffering	Scaling	Scaling
171	CBX5	0.422906	0.0791923	-1.55854	0.00165203	-0.343042	-0.786157	0.00112235	0.422235	1124	0.19529	0.0983631	0.693543	0.000401484	-0.365886	-0.444524	7.14602e-05	0.464249	Buffering	Scaling	Buffering	Scaling
172	CCDC127	1.27467e-16	0.412778	0.432062	2.04484e-05	-0.354782	-1.42421	8.37795e-14	0.767561	1139	0.000345306	0.260156	0.685714	0.0237233	-0.278719	-0.301548	0.000257778	0.538875	Scaling	Scaling	Scaling	Scaling
173	CCDC8	0.00128024	0.421027	0.200602	0.0146152	-0.318015	0.597221	3.99532e-06	0.739042	1163	0.367704	0.131019	0.622766	0.123436	-0.347689	-2.29295	0.0441326	0.478708	Buffering	Scaling	Scaling	Scaling
174	CCDC86	0.0247262	0.148055	-0.145265	0.758123	-0.018927	-0.102606	0.0291381	0.166982	1168	0.861859	0.0107308	6.13341	0.179891	-0.103221	-0.809497	0.197072	0.113952	Buffering	Buffering	Buffering	Buffering
175	CCDC9	0.107057	0.133232	0.86342	0.00755299	-0.183142	-4.83426	0.000610878	0.316374	1172	0.00864981	0.223695	0.331195	0.0903019	-0.101416	-0.538353	0.000656346	0.325111	Buffering	Buffering	Buffering	Buffering
176	CCDC90B	0.00252616	0.217718	-7.03352	4.6727e-06	-0.380562	-0.567342	3.72356e-09	0.598279	1173	0.000838614	0.273216	0.389948	0.178055	-0.0940885	-0.720077	0.00016252	0.367304	Scaling	Buffering	Buffering	Scaling
177	CCDC93	0.0911596	0.109407	-1.52674	4.55104e-05	-0.399861	-0.319876	4.7505e-06	0.509269	1176	0.386928	-0.0420893	-2.80741	0.476134	-0.0369214	-5.77513	0.936993	-0.00516794	Buffering	Buffering	Buffering	Scaling
178	CCDC97	7.62156e-07	0.422056	0.225901	1.64589e-18	-0.547531	1193.61	4.56676e-19	0.969587	1178	0.0677481	0.195296	1.10176	0.345691	-0.093632	-0.659532	0.0256598	0.288928	Buffering	Buffering	Scaling	Scaling
179	CCM2	0.000142067	0.261808	-0.635478	4.36643e-11	-0.496026	-0.230071	7.10145e-16	0.757835	1180	0.0470779	0.140521	0.479211	0.0393063	-0.155621	-0.43603	0.000577096	0.296143	Buffering	Buffering	Scaling	Scaling
180	CCNT1	0.000414559	0.202119	0.638545	1.46602e-05	-0.269377	-0.728498	1.97553e-10	0.471496	1190	0.112448	0.137769	0.567899	0.0398528	-0.218619	-0.592571	0.00388958	0.356389	Buffering	Buffering	Buffering	Scaling
181	CCS	0.00582879	0.171776	-2.34238	0.000319135	-0.26587	-0.567241	8.4878e-07	0.437646	1196	0.588508	0.0424163	0.948256	0.0871223	-0.125373	-1.56463	0.0803085	0.16779	Buffering	Buffering	Buffering	Scaling
182	CCT2	2.49345e-05	0.295268	-0.393434	6.01399e-11	-0.508576	-0.175685	2.22225e-17	0.803844	1197	0.467815	0.0333782	0.646874	0.599233	-0.0279048	-12.1291	0.324939	0.061283	Buffering	Buffering	Scaling	Scaling
183	CCT5	1.00679e-27	0.564318	6.29427	0.000458639	-0.363799	-0.355344	1.91618e-12	0.928117	1200	0.63723	0.0174528	1.21717	0.531304	-0.0395858	-1.86899	0.392804	0.0570386	Buffering	Buffering	Scaling	Scaling
184	CCT6A	9.94851e-05	0.205268	-0.262226	1.10486e-10	-0.420156	-0.173573	1.39662e-15	0.625424	1201	0.565965	-0.0222783	3.7074	0.549832	-0.031118	-20.6471	0.876612	0.00883977	Buffering	Buffering	Buffering	Scaling
185	CCT8	6.36143e-08	0.265176	-0.467325	1.39901e-22	-0.441672	-0.160812	1.73164e-25	0.706849	1203	0.385647	0.0380743	0.26882	0.233083	-0.0390218	-2.47376	0.0872104	0.0770961	Buffering	Buffering	Scaling	Scaling
186	CD2AP	0.000103163	0.250184	0.533534	7.66562e-13	-0.595715	-0.502083	5.31776e-19	0.845898	1217	0.0453786	0.131322	0.432898	0.000247306	-0.365706	-0.277091	9.15964e-06	0.497028	Buffering	Scaling	Scaling	Scaling
187	CD38	0.474656	0.239448	-2.95817	0.645477	-0.0759959	-1.98923	0.347728	0.315444	1223	0.0912002	-0.338112	-0.801767	0.966337	0.00651579	-34.6951	0.102896	-0.344627	Anti-Scaling	Buffering	Buffering	Buffering
188	CD3EAP	0.0401693	0.15347	1.14576	2.08148e-10	-0.434871	-0.534448	5.71171e-11	0.588341	1224	0.00298835	0.198038	0.149832	0.100448	-0.14264	-0.379045	0.00042026	0.340678	Buffering	Buffering	Buffering	Scaling
189	CD63	7.9853e-06	0.287498	0.214182	1.40563e-05	-0.328626	1.12039	4.65508e-12	0.616124	1236	0.673375	-0.0588669	-4.95611	0.0485433	-0.238573	-0.81209	0.263405	0.179706	Buffering	Buffering	Scaling	Scaling
190	CDC37L1	3.81635e-07	0.367875	0.156975	3.38934e-24	-0.610332	0.596478	2.62226e-29	0.978207	1257	0.000974305	0.218384	0.258959	0.000396726	-0.259638	-0.601004	1.53662e-07	0.478022	Buffering	Scaling	Scaling	Scaling
191	CDC42BPG	0.118406	0.06453	0.182825	7.69331e-05	-0.173717	0.379617	2.56502e-06	0.238247	1262	0.164331	0.158023	0.81004	0.32758	0.086938	0.739348	0.577343	0.0710852	Buffering	Buffering	Buffering	Buffering
192	CDC5L	1.10877e-13	0.410791	0.517359	1.09985e-08	-0.464544	-0.433453	1.52488e-18	0.875334	1267	0.00830826	0.111394	0.240927	0.788355	0.0110313	0.386534	0.0519004	0.100363	Buffering	Buffering	Scaling	Scaling
193	CDH6	0.0156876	0.401206	0.795264	0.00374731	-0.768028	0.801437	3.12782e-05	1.16923	1280	0.050972	0.256426	32.5189	0.168655	-0.439367	-1.34423	0.0409314	0.695794	Scaling	Scaling	Scaling	Scaling
194	CDK2	0.363668	0.0839348	-0.525012	3.11859e-05	-0.419533	-0.352499	2.41666e-05	0.503468	1290	0.149275	0.104213	0.922688	0.0171157	-0.206212	-0.471759	0.00155367	0.310425	Buffering	Buffering	Buffering	Scaling
195	CDK2AP1	0.0586659	0.116507	0.189368	4.92695e-05	-0.319639	0.579135	8.29373e-07	0.436146	1291	0.103298	0.118566	0.878634	0.405645	-0.0582144	-1.00485	0.0472863	0.176781	Buffering	Buffering	Buffering	Scaling
196	CDK4	0.000782293	0.231712	0.994814	2.19419e-09	-0.413812	-0.533053	8.69399e-13	0.645523	1292	0.382509	0.0717025	3.18614	0.0865093	-0.0966322	-0.296471	0.0538171	0.168335	Buffering	Buffering	Buffering	Scaling
197	CDKAL1	2.99496e-08	0.330646	1.18778	1.00893e-06	-0.368822	-0.347681	4.33156e-15	0.699468	1300	0.000299568	0.20482	0.333428	0.0012234	-0.230535	-0.159238	7.80903e-07	0.435355	Buffering	Buffering	Scaling	Scaling
198	CDKN2A	0.000838339	0.695668	0.763251	3.46867e-15	-1.57028	22.0483	8.06394e-20	2.26595	1302	0.00020683	0.499397	0.548945	0.000613361	-0.487432	-0.830135	1.10546e-10	0.986829	Scaling	Scaling	Scaling	Scaling
199	CDYL	6.30847e-18	0.56508	-2.86474	2.95473e-06	-0.433674	-0.262165	1.42011e-18	0.998754	1310	0.00198459	0.194775	0.85498	0.529873	-0.0519913	-0.499303	0.0127091	0.246767	Buffering	Buffering	Scaling	Scaling
200	CEP290	5.37535e-05	0.450237	-7.39334	8.02542e-06	-0.49375	-0.558765	5.80929e-11	0.943987	1337	0.654876	-0.0704237	96.025	0.887245	-0.0186474	2.43849	0.772167	-0.0517764	Buffering	Buffering	Scaling	Scaling
201	CFB	0.631352	-0.0878432	0.754118	0.00907724	-0.55016	0.571144	0.0551768	0.462317	1364	0.18195	-0.14933	-6.6203	0.0510074	-0.326726	-1.46607	0.311972	0.177396	Anti-Scaling	Scaling	Buffering	Scaling
202	CFL1	0.00832739	0.184395	-0.846187	0.467236	-0.0489496	-0.414966	0.00469181	0.233345	1373	0.241332	0.0646434	0.794206	0.00454724	-0.157767	-0.275349	0.00178693	0.222411	Buffering	Buffering	Buffering	Buffering
203	CHCHD2	0.00552456	0.149051	0.485751	4.68428e-08	-0.383355	-1.20462	2.61743e-11	0.532407	1386	0.0675132	0.155916	1.6891	0.0153379	-0.24482	-0.489812	0.000524348	0.400736	Buffering	Buffering	Buffering	Scaling
204	CHMP1B	0.016183	0.197921	0.433285	5.08556e-30	-0.539308	1.5017	3.15443e-14	0.737229	1415	0.0922235	0.153738	0.55224	1.14028e-11	-0.336694	-0.208342	1.03733e-05	0.490431	Buffering	Scaling	Buffering	Scaling
205	CHMP2A	0.138412	0.157321	0.75543	3.07073e-10	-0.425764	-38.2852	1.7079e-06	0.583086	1416	0.579395	0.0491526	0.746598	0.00392395	-0.247187	-0.561914	0.00731253	0.296339	Buffering	Buffering	Buffering	Scaling
206	CHMP5	0.0103777	0.224554	0.432026	3.0288e-18	-0.568955	3.06909	2.88626e-15	0.793509	1422	0.00580721	0.162242	0.265046	4.30641e-06	-0.210535	-0.293554	1.7517e-08	0.372776	Buffering	Buffering	Buffering	Scaling
207	CHORDC1	8.73679e-05	0.349141	-1.91067	8.72662e-07	-0.411656	-0.337543	9.91055e-12	0.760797	1426	0.0372667	0.217259	0.884404	0.000504848	-0.24176	-0.244959	0.000125982	0.459019	Buffering	Buffering	Scaling	Scaling
208	CIAO1	0.540001	0.0437834	-0.772539	0.774366	0.0308147	-0.998362	0.916553	0.0129687	1438	0.440869	0.0500941	0.985317	0.292635	0.117097	1.03666	0.584691	-0.0670033	Buffering	Anti-Scaling	Buffering	Buffering
209	CIC	0.00663705	0.309826	0.561858	0.0213918	-0.208874	1.91954	6.4061e-05	0.5187	1441	0.994087	-0.000515971	0.318593	0.295164	-0.0990445	3.26781	0.296884	0.0985285	Buffering	Buffering	Scaling	Buffering
210	CIT	0.391743	0.0870809	-0.39848	3.94313e-09	-0.61556	-0.219755	2.92782e-08	0.702641	1451	0.43161	0.0920253	0.696984	0.288285	-0.131649	-7.02369	0.0912092	0.223674	Buffering	Buffering	Buffering	Scaling
211	CKAP4	3.89142e-07	0.422264	0.872496	6.02412e-07	-0.492671	-0.808944	1.55491e-14	0.914936	1454	0.00876367	0.206003	0.414962	0.0914484	-0.197618	-1.19269	0.00202076	0.403621	Buffering	Buffering	Scaling	Scaling
212	CLASP1	0.000357647	0.277148	0.845122	0.0853288	-0.183015	-1.85203	0.000346256	0.460163	1461	0.466253	0.0615073	0.85454	0.31956	-0.072946	-1.1986	0.204775	0.134453	Buffering	Buffering	Scaling	Buffering
213	CLC	0.806681	-0.0369034	0.587855	0.148874	-0.205274	1.14538	0.329408	0.168371	1464	0.647619	-0.0963311	-1.38802	0.817421	-0.0739258	-4.23869	0.945853	-0.0224053	Buffering	Buffering	Buffering	Buffering
214	CLEC11A	0.0195085	-0.256728	0.384174	4.46829e-05	-0.391395	0.584135	0.250953	0.134667	1478	0.278185	-0.231865	-5.03768	0.0042986	-0.515776	-0.613567	0.190907	0.283911	Anti-Scaling	Scaling	Anti-Scaling	Scaling
215	CLIC1	6.91489e-05	0.244628	-1.78532	1.74227e-05	-0.298955	-0.223598	3.34235e-11	0.543583	1483	0.00902517	0.126334	0.428891	0.0142609	-0.206428	-0.352694	0.000531214	0.332762	Buffering	Buffering	Buffering	Scaling
216	CLIC5	0.77993	0.0364602	0.237913	0.731479	0.0609821	0.255891	0.898713	-0.0245219	1487	0.0139299	-0.402272	-1.6459	0.0377648	-0.437668	-1.29516	0.879659	0.0353956	Anti-Scaling	Scaling	Buffering	Buffering
217	CLIC6	0.524617	0.145313	1.33884	0.0364064	-0.393466	2.83332	0.0372424	0.538779	1488	0.903204	-0.023137	-83.07	0.681917	0.0358818	3.41622	0.766056	-0.0590188	Buffering	Buffering	Buffering	Scaling
218	CLIP1	0.0284358	0.175142	3.07645	1.42677e-08	-0.41135	-0.446612	1.02196e-09	0.586492	1490	0.686074	-0.0189837	0.958131	0.0329978	-0.110709	-0.802168	0.13248	0.0917257	Buffering	Buffering	Buffering	Scaling
219	CLNS1A	3.35939e-10	0.371458	1.34225	0.660138	0.0640795	-8.37144	0.0448838	0.307379	1499	0.0488025	0.160271	1.45922	0.445332	-0.0795848	-1.15191	0.0506413	0.239856	Buffering	Buffering	Scaling	Buffering
220	CLP1	0.405602	0.0478366	1.97826	0.000252589	-0.219428	-1.13289	0.000315056	0.267264	1500	0.591577	0.0289164	0.738217	0.240675	0.0910112	0.72253	0.465246	-0.0620948	Buffering	Buffering	Buffering	Buffering
221	CLPB	1.61696e-06	0.461161	-1.61148	0.00786978	-0.213203	-0.320244	1.85402e-09	0.674363	1501	0.0255921	0.115435	0.471801	0.751429	-0.0198519	-1.79436	0.0697858	0.135286	Buffering	Buffering	Scaling	Buffering
222	CLPTM1	0.0710142	0.187923	-0.896496	0.00493419	-0.22994	-0.503077	0.00053674	0.417863	1504	0.00217689	0.257982	0.210756	0.532086	-0.0744504	-7.37198	0.0135533	0.332432	Scaling	Buffering	Buffering	Buffering
223	CLPTM1L	2.1131e-23	0.451719	1.24303	2.3321e-08	-0.341716	-0.125134	6.86702e-23	0.793435	1505	5.05358e-05	0.230617	0.408131	0.000305599	-0.288942	-0.11195	1.33705e-07	0.51956	Buffering	Scaling	Scaling	Scaling
224	CLTA	2.74088e-06	0.222948	0.140351	7.75437e-26	-0.395034	0.899371	2.9714e-26	0.617982	1508	0.959336	-0.00322089	0.829291	0.0261817	-0.0985677	-4.77597	0.108363	0.0953469	Buffering	Buffering	Buffering	Scaling
225	CMBL	0.00212327	0.372857	-4.31646	0.000507672	-0.796579	-0.9513	2.01554e-06	1.16944	1518	0.0854589	0.211431	-9.44427	0.0122801	-0.363667	-0.214752	0.000557033	0.575098	Buffering	Scaling	Scaling	Scaling
226	CNNM3	0.00641086	0.204406	-2.63276	0.374316	-0.117031	-1.16598	0.0302803	0.321436	1540	0.111398	0.113876	0.196366	0.0946548	-0.161397	-0.70039	0.0132248	0.275273	Buffering	Buffering	Buffering	Buffering
227	CNNM4	0.206288	0.1128	0.486578	0.210266	-0.189233	1.45985	0.0732253	0.302034	1541	0.247178	0.184071	1.18249	0.125879	-0.251339	-0.984396	0.0474338	0.435411	Buffering	Scaling	Buffering	Buffering
228	CNOT2	7.43816e-06	0.235451	0.263288	6.13243e-17	-0.415453	-0.722152	2.3225e-21	0.650905	1545	0.104192	0.0968477	0.312423	0.571487	-0.03821	-1.93748	0.0386287	0.135058	Buffering	Buffering	Buffering	Scaling
229	CNOT3	0.00930338	0.243628	8.67168	0.0415025	-0.151807	-1.04061	0.000298508	0.395435	1546	0.128378	0.113712	0.381578	0.0279973	-0.234823	-0.995632	0.00483755	0.348535	Buffering	Buffering	Buffering	Buffering
230	CNTN1	0.283976	0.0976823	1.28451	0.793308	0.0252919	1.77063	0.539266	0.0723905	1559	0.181878	0.234149	2.1215	0.551376	-0.121572	-2.45171	0.124542	0.355721	Buffering	Buffering	Buffering	Buffering
231	COL18A1	0.0691053	0.201648	0.95559	0.00403149	-0.231727	6.82475	0.000343906	0.433375	1585	0.531436	0.0806288	3.04713	0.580996	-0.0442381	-2.19639	0.3555	0.124867	Buffering	Buffering	Buffering	Buffering
232	COL2A1	0.0908752	0.285836	-2.94094	0.232183	-0.163943	-0.895427	0.0194462	0.449779	1590	0.0634624	0.324206	3.28533	0.652437	0.0933079	-8.09675	0.321473	0.230899	Scaling	Buffering	Scaling	Buffering
233	COL3A1	0.00127981	-0.591592	0.332604	0.823548	0.0598077	0.405188	0.035467	-0.651399	1591	0.839993	0.0416498	-149.482	0.853326	0.0322598	-20.673	0.969399	0.00939003	Buffering	Buffering	Anti-Scaling	Buffering
234	COL5A2	0.00128348	-0.64872	95.6751	0.865357	0.0578362	4.3819	0.0604589	-0.706556	1597	0.697863	0.0674703	191.735	0.691151	0.0749271	35.421	0.974666	-0.00745685	Buffering	Buffering	Anti-Scaling	Buffering
235	COL6A1	0.834491	0.0273387	-9.83324	0.0837249	-0.14914	-2.1462	0.201905	0.176479	1599	0.838053	-0.0275546	175.507	0.895444	0.0151072	5.72018	0.758883	-0.0426618	Buffering	Buffering	Buffering	Buffering
236	COL6A2	0.54117	0.0805278	-0.920864	0.0834162	-0.158862	-0.573263	0.0826457	0.23939	1600	0.848007	-0.0243599	49.955	0.943497	0.00740812	6.06316	0.809558	-0.031768	Buffering	Buffering	Buffering	Buffering
237	COL6A3	0.027133	-0.372746	-82.1109	0.544124	-0.163591	10.1986	0.4851	-0.209155	1601	0.913303	-0.0196481	10.1036	0.27295	-0.160163	-1.56323	0.499181	0.140515	Buffering	Buffering	Anti-Scaling	Buffering
238	COLEC12	0.145466	-0.26595	-0.778052	0.917595	0.0139809	-0.996763	0.136213	-0.279931	1609	0.0154854	-0.457048	-0.78174	0.980684	0.00338622	-28.7998	0.027482	-0.460434	Anti-Scaling	Buffering	Anti-Scaling	Buffering
239	COMMD8	0.0136455	0.329405	0.693422	1.0843e-12	-0.553437	-1.92664	2.28945e-08	0.882842	1620	0.902833	0.0193798	4.51566	0.701423	-0.0327901	-250.954	0.764992	0.0521699	Buffering	Buffering	Scaling	Scaling
240	COPS7B	0.000202401	0.261553	-0.773135	0.0563568	-0.144216	-0.209418	3.61054e-05	0.405769	1638	0.426925	0.0522806	0.726254	0.464323	-0.036063	-0.762319	0.237437	0.0883436	Buffering	Buffering	Scaling	Buffering
241	COPS8	0.0326939	0.162694	-0.655601	0.0650036	-0.1894	-0.36486	0.00404376	0.352094	1639	0.0851884	0.11295	0.27117	0.682861	0.0242313	0.493527	0.249452	0.0887183	Buffering	Buffering	Buffering	Buffering
242	COPZ1	3.58924e-07	0.275232	0.249718	1.75054e-11	-0.390741	-1.21708	2.60814e-19	0.665974	1640	0.140158	0.0510786	0.203231	0.409597	0.043392	0.582814	0.890176	0.0076866	Buffering	Buffering	Scaling	Scaling
243	COQ5	0.00342565	0.172936	0.610672	2.99337e-07	-0.324624	-0.797723	9.01025e-11	0.49756	1644	0.17948	0.0941057	0.856459	0.120843	-0.122279	-0.839204	0.0216925	0.216385	Buffering	Buffering	Buffering	Scaling
244	CORO1B	0.000743963	0.221665	-0.605538	0.010759	-0.179883	-0.329005	1.55088e-06	0.401549	1651	0.0831344	0.0983844	0.448494	8.52902e-06	-0.247492	-0.158881	3.67839e-06	0.345876	Buffering	Buffering	Buffering	Buffering
245	CORO1C	0.443073	0.0684492	-0.663432	0.274093	-0.0951775	-0.465428	0.131749	0.163627	1652	0.173891	-0.124173	-2.87729	0.24668	-0.10834	-3.70252	0.894145	-0.0158325	Anti-Scaling	Buffering	Buffering	Buffering
246	COX19	0.00332553	0.263324	-0.946545	3.74538e-10	-0.60111	-0.319089	8.97016e-14	0.864434	1663	0.241874	0.10033	0.564595	0.671433	-0.0368331	-1.83764	0.176214	0.137163	Buffering	Buffering	Scaling	Scaling
247	COX5B	0.943251	-0.00516944	0.210857	0.911578	-0.0147517	0.467031	0.946767	0.00958222	1669	0.0113237	-0.188793	-0.25186	0.946858	0.00704829	14.2801	0.110709	-0.195841	Anti-Scaling	Buffering	Buffering	Buffering
248	COX6A1	0.168845	0.0974561	0.345788	1.04252e-11	-0.498317	1.17143	5.60832e-11	0.595773	1670	0.218743	-0.15478	-1.67639	0.963556	0.00618258	5.67142	0.268848	-0.160962	Anti-Scaling	Buffering	Buffering	Scaling
249	COX6B1	5.64919e-05	0.323169	0.163154	1.13253e-12	-0.537544	0.920223	1.8004e-16	0.860713	1671	0.495192	-0.0499321	-1.38729	0.281111	-0.0881618	-1.02004	0.68084	0.0382297	Buffering	Buffering	Scaling	Scaling
250	COX8A	0.000123628	0.267533	0.692417	0.00166608	-0.250612	-2.17925	4.44994e-08	0.518146	1677	0.541827	-0.0664696	75.1989	0.695106	0.0596463	2.59686	0.441107	-0.126116	Buffering	Buffering	Scaling	Scaling
251	CPM	0.30828	0.208333	-21.9746	0.0138689	-0.428451	-1.77204	0.00553245	0.636784	1686	0.641147	0.0718643	-18.8931	0.0614081	-0.265627	-0.649701	0.0482207	0.337491	Buffering	Scaling	Buffering	Scaling
252	CPNE8	0.585381	-0.0615742	-0.624411	0.0642743	0.211489	-0.791159	0.0538036	-0.273063	1692	0.782978	-0.0421477	3.86452	0.291118	-0.202856	-5.76949	0.456585	0.160708	Buffering	Buffering	Buffering	Anti-Scaling
253	CPS1	0.455977	0.0950342	-0.180519	0.688166	-0.0606538	-0.142022	0.398875	0.155688	1696	0.0538284	0.203395	0.359108	0.0989206	-0.259099	-0.872049	0.0113356	0.462495	Buffering	Scaling	Buffering	Buffering
254	CPSF6	0.316934	0.0598204	0.587251	0.000157592	-0.281902	-6.92989	4.9187e-05	0.341722	1701	0.306504	0.0378013	0.193216	0.108742	-0.0688662	-18.2934	0.0253904	0.106667	Buffering	Buffering	Buffering	Scaling
255	CPT1A	0.000434696	0.328065	2.412	0.0167324	-0.218317	-1.30139	3.08565e-06	0.546382	1703	0.650251	0.055651	3.29247	0.00288001	-0.324121	-0.543075	0.0111425	0.379772	Buffering	Scaling	Scaling	Buffering
256	CPVL	0.000771805	0.490703	2.17884	0.0602854	-0.216043	-4.3351	1.01838e-05	0.706746	1707	0.315477	0.170519	15.7606	0.436906	-0.0847002	-0.71905	0.146849	0.255219	Buffering	Buffering	Scaling	Buffering
257	CREB1	0.0297371	0.178796	0.669582	0.116261	-0.17303	3.89218	0.00685578	0.351825	1720	0.240343	0.0932966	0.495841	0.277206	-0.129656	-1.47895	0.106615	0.222953	Buffering	Buffering	Buffering	Buffering
258	CRMP1	0.76437	0.0698065	-3.44781	0.278576	0.115461	-2.93645	0.844902	-0.0456541	1733	0.909162	0.0196678	6.42277	0.551647	-0.0506869	-9.03583	0.69455	0.0703547	Buffering	Buffering	Buffering	Anti-Scaling
259	CRYAB	0.0156852	0.315334	0.232256	0.000669733	-0.52041	0.414171	1.63156e-06	0.835745	1744	0.832764	0.0551956	-4.95631	0.0402954	-0.407557	-0.632829	0.100315	0.462752	Buffering	Scaling	Scaling	Scaling
260	CRYZL1	0.0203588	0.182526	1.95903	4.79598e-08	-0.338014	-0.739519	2.47232e-08	0.52054	1752	0.0916488	0.0818233	0.233917	0.00654655	-0.126403	-0.402797	0.000418507	0.208226	Buffering	Buffering	Buffering	Scaling
261	CS	0.0282617	0.191087	-0.990339	0.00696481	-0.229654	-0.4376	0.000139606	0.42074	1753	0.0055021	0.199822	0.465503	0.00725231	-0.183553	-0.337132	3.0913e-05	0.383375	Buffering	Buffering	Buffering	Buffering
262	CSNK2B	4.16119e-13	0.362222	-0.806325	4.769e-13	-0.485957	-0.115413	8.47963e-25	0.848179	1769	0.306024	0.030345	0.862748	0.0445728	0.0833306	0.254279	0.214407	-0.0529856	Buffering	Buffering	Scaling	Scaling
263	CSRP2	0.175014	0.223154	161.902	2.25774e-06	-0.721763	-1.04401	1.2572e-06	0.944918	1772	0.352435	-0.126588	-1.38148	0.148082	-0.228605	-1.19354	0.573924	0.102017	Anti-Scaling	Buffering	Buffering	Scaling
264	CSTB	0.000354468	0.322996	0.529513	4.35547e-09	-0.458498	-1.79935	9.73738e-13	0.781494	1776	0.0385184	0.226205	0.521034	0.000111979	-0.303245	-0.451913	7.34788e-05	0.52945	Buffering	Scaling	Scaling	Scaling
265	CTBP1	0.00721684	0.224866	0.203823	9.04975e-11	-0.338174	1.27988	8.25047e-09	0.56304	1783	0.161768	0.0835708	0.303673	0.12431	-0.0675333	-1.12391	0.0247537	0.151104	Buffering	Buffering	Buffering	Scaling
266	CTNND1	0.226082	0.0762408	0.4005	6.42993e-08	-0.346248	1.47322	5.11417e-08	0.422489	1801	0.190407	0.0795491	0.918342	0.245398	-0.0612962	-0.655752	0.0538684	0.140845	Buffering	Buffering	Buffering	Scaling
267	CTSC	0.0762817	0.158309	1.17793	0.00520538	-0.267476	-9.50759	0.000202155	0.425785	1808	0.00282176	0.226758	0.56131	0.938348	-0.0107855	-3.49961	0.107762	0.237543	Buffering	Buffering	Buffering	Scaling
268	CTSF	0.00210201	0.306258	0.219836	0.0731799	-0.201195	0.357125	0.000151597	0.507452	1810	0.0515517	0.327961	1.79913	0.619605	-0.0872267	-2.23933	0.0589071	0.415188	Scaling	Buffering	Scaling	Buffering
269	CTTN	1.61896e-06	0.275518	0.671817	0.0001154	-0.276627	-0.96779	1.2729e-10	0.552145	1818	0.426339	0.0497687	1.61697	0.267516	-0.106686	-1.41242	0.143872	0.156455	Buffering	Buffering	Scaling	Scaling
270	CUL3	0.0169838	0.234465	0.790717	0.00288121	-0.319871	-16.5212	5.3282e-05	0.554336	1827	0.0521388	0.12625	0.212648	0.0181963	-0.141452	-0.347811	0.00158157	0.267701	Buffering	Buffering	Buffering	Scaling
271	CUL5	0.000480063	0.268184	0.265635	6.43332e-16	-0.656542	0.823979	3.26806e-19	0.924726	1830	0.00111151	0.187924	0.196555	3.27907e-08	-0.262453	-0.112425	1.3664e-09	0.450377	Buffering	Scaling	Scaling	Scaling
272	CUL7	1.94886e-12	0.556713	1.0218	2.91502e-07	-0.46826	-0.416287	8.44642e-19	1.02497	1831	0.18964	0.098063	0.696671	0.000417772	-0.23993	-0.203203	0.000178605	0.337993	Buffering	Buffering	Scaling	Scaling
273	CUTA	3.53327e-07	0.328556	0.360286	1.32253e-06	-0.390226	1.67815	3.25017e-13	0.718782	1833	0.219925	0.0966108	1.06298	0.00123235	-0.212607	-0.180966	0.000595781	0.309218	Buffering	Buffering	Scaling	Scaling
274	CWC15	2.17172e-11	0.377844	0.268613	4.36368e-13	-0.452824	-0.735637	2.32004e-24	0.830668	1836	0.10984	0.101662	0.436687	0.177436	-0.0936397	-4.02742	0.0258867	0.195302	Buffering	Buffering	Scaling	Scaling
275	CXADR	0.0666121	0.216719	0.755446	1.61111e-06	-0.5018	41.6204	8.50514e-07	0.718519	1842	0.0339567	0.295573	0.745284	0.00479219	-0.253816	-0.679879	0.000691068	0.549388	Scaling	Scaling	Buffering	Scaling
276	CYBRD1	0.150573	0.25938	1.10417	0.594146	-0.104934	1.01715	0.150601	0.364314	1860	0.207907	0.204308	1.44161	0.889892	-0.0208274	-5.84528	0.270895	0.225136	Buffering	Buffering	Scaling	Buffering
277	CYCS	0.00186802	0.235023	-0.715768	1.06351e-11	-0.54903	-0.242347	3.84007e-15	0.784053	1862	0.23457	0.122071	-8.00818	0.107875	-0.165743	-0.551442	0.0199027	0.287814	Buffering	Buffering	Buffering	Scaling
278	CYP20A1	0.0302156	0.129	1.14549	0.0861719	-0.125956	-1.18028	0.0046063	0.254956	1871	0.850353	0.01008	0.414731	0.0144607	-0.138822	-0.292719	0.0341103	0.148902	Buffering	Buffering	Buffering	Buffering
279	CYP2S1	0.567337	-0.0751873	3.17774	0.00644491	-0.23068	8.33628	0.24622	0.155493	1873	0.669422	-0.0875993	-4.96865	0.0313262	-0.271905	-0.627403	0.402669	0.184305	Buffering	Scaling	Buffering	Buffering
280	DAB2	0.198632	-0.084631	-1.57296	0.572797	-0.0789664	-2.41908	0.96783	-0.00566456	1891	0.230822	-0.0755798	-3.89765	0.381786	-0.099709	-2.12483	0.834436	0.0241292	Buffering	Buffering	Buffering	Buffering
281	DAGLB	3.36838e-07	0.273147	-0.371042	4.96875e-09	-0.378468	-0.202892	6.16674e-17	0.651615	1896	0.173983	0.116445	0.503302	0.0021393	-0.295641	-0.623521	0.000285515	0.412086	Buffering	Scaling	Scaling	Scaling
282	DAP	4.46491e-12	0.330516	-1.35493	0.000287594	-0.242065	-0.153616	2.9212e-12	0.572581	1897	0.65587	0.0402301	2.32146	0.0529615	-0.355229	-0.963382	0.0390491	0.395459	Buffering	Scaling	Scaling	Buffering
283	DAPL1	0.330428	0.219171	0.312288	0.364191	-0.241767	0.275105	0.148583	0.460938	1902	0.588698	0.180278	-3.31995	0.00302745	-0.614451	-0.1985	0.0349092	0.794729	Buffering	Scaling	Buffering	Buffering
284	DARS	0.0106496	0.137463	-1.19698	2.68415e-05	-0.378588	-0.272428	3.54078e-07	0.516051	1903	0.595827	0.0395526	0.558432	0.0484506	-0.128981	-0.617418	0.0724246	0.168533	Buffering	Buffering	Buffering	Scaling
285	DAXX	5.85678e-10	0.374316	-4.87138	2.05971e-07	-0.36629	-0.201349	5.6468e-17	0.740606	1905	0.0713163	0.128336	1.01756	0.0019001	-0.222749	-0.154859	5.0334e-05	0.351084	Buffering	Buffering	Scaling	Scaling
286	DBI	0.000335989	-0.317431	-0.559431	0.0229984	-0.334487	-0.947208	0.913215	0.0170561	1908	0.389167	-0.0601218	1.44362	0.0350373	-0.161909	-0.605056	0.249129	0.101787	Buffering	Buffering	Anti-Scaling	Scaling
287	DBNL	0.00203518	0.246022	-1.01436	0.00255254	-0.23446	-0.385893	1.1114e-06	0.480482	1910	0.0111032	0.109168	0.184216	0.000334922	-0.131213	-0.232032	4.03302e-06	0.24038	Buffering	Buffering	Buffering	Buffering
288	DCN	0.886219	0.0309655	2.46491	0.0458365	0.466546	1.91795	0.105987	-0.435581	1929	0.590358	0.0972939	-9.05967	0.973935	-0.00701949	-4.58854	0.66889	0.104313	Buffering	Buffering	Buffering	Anti-Scaling
289	DCPS	0.000970988	0.208587	-0.293932	3.10623e-06	-0.302257	-0.159764	2.03444e-10	0.510844	1933	0.0256466	0.156139	0.31895	1.56058e-06	-0.330743	-0.180996	5.51656e-08	0.486882	Buffering	Scaling	Buffering	Scaling
290	DCTN2	9.96827e-06	0.258195	0.66095	1.21298e-09	-0.362994	-0.441601	2.36583e-15	0.621188	1936	0.428684	-0.0415559	4.78247	0.059607	-0.0729167	-0.716105	0.551075	0.0313607	Buffering	Buffering	Scaling	Scaling
291	DCTN3	0.00168159	0.268492	0.543919	5.52515e-20	-0.569115	-1.72017	2.89248e-17	0.837607	1937	0.911131	0.00554835	0.73585	0.15588	-0.0627206	-5.11448	0.187175	0.0682689	Buffering	Buffering	Scaling	Scaling
292	DCUN1D5	3.90414e-07	0.359325	-0.585173	6.7814e-14	-0.520467	-0.14686	2.2308e-21	0.879792	1945	0.000270778	0.300899	0.305898	0.0397252	-0.22065	-0.80405	6.37479e-05	0.521548	Scaling	Buffering	Scaling	Scaling
293	DDAH2	6.08956e-11	0.533336	0.2228	0.0690435	-0.18564	0.376105	1.9866e-09	0.718975	1949	0.0255023	0.186334	0.817478	0.0982826	-0.154619	-0.614399	0.0033298	0.340953	Buffering	Buffering	Scaling	Buffering
294	DDB1	0.388549	0.0424893	-0.558139	0.0167966	-0.135773	-0.415568	0.00618339	0.178262	1950	0.189013	-0.0504386	1.03013	0.723339	-0.0154446	0.467771	0.451528	-0.034994	Buffering	Buffering	Buffering	Buffering
295	DDR1	0.00986324	0.212712	0.327334	1.0418e-05	-0.465216	0.481909	1.66567e-08	0.677928	1956	0.0664614	0.140219	0.768965	0.0562826	-0.199258	-0.747316	0.00578557	0.339477	Buffering	Buffering	Buffering	Scaling
296	DDX10	8.30043e-08	0.327766	-1.52025	4.92261e-12	-0.424317	-0.191756	1.13256e-19	0.752083	1961	0.0337807	0.134993	0.364552	0.0190427	-0.161208	-0.481583	0.000417351	0.296201	Buffering	Buffering	Scaling	Scaling
297	DDX18	0.10572	0.118306	1.63176	3.78485e-06	-0.432155	-0.428972	7.99997e-07	0.550461	1964	0.903189	0.0137082	4.09006	0.0111784	-0.174976	-0.225309	0.140298	0.188685	Buffering	Buffering	Buffering	Scaling
298	DDX23	0.00017703	0.189133	0.89503	2.55213e-09	-0.364465	-0.399351	3.35061e-14	0.553598	1969	0.00212819	0.157988	0.239231	0.0054845	-0.128405	-0.243679	5.40558e-06	0.286393	Buffering	Buffering	Buffering	Scaling
299	DDX51	0.000457084	0.256868	-4.57026	9.67264e-05	-0.292028	-0.443416	7.727e-09	0.548896	1984	0.770311	0.0156011	0.813777	0.417036	-0.0498941	-1.97819	0.286923	0.0654952	Buffering	Buffering	Scaling	Scaling
300	DDX54	0.000277311	0.233338	-2.121	3.53322e-10	-0.411804	-0.243967	2.60167e-14	0.645141	1986	0.88986	-0.0104382	1.96683	0.377699	-0.0627262	12.8794	0.584079	0.0522881	Buffering	Buffering	Buffering	Scaling
301	DDX55	0.191474	0.0685316	-0.193507	4.14947e-08	-0.360016	-0.171517	7.63084e-09	0.428547	1987	0.163926	0.107386	0.462781	0.0273646	-0.200438	-0.623638	0.00219306	0.307824	Buffering	Buffering	Buffering	Scaling
302	DDX56	0.000238936	0.192399	-0.181626	1.15803e-09	-0.394449	-0.149507	3.14765e-14	0.586848	1988	0.716611	0.02225	0.998012	0.00736145	-0.113132	-0.326076	0.0379634	0.135382	Buffering	Buffering	Buffering	Scaling
303	DDX58	9.24245e-06	0.636224	0.302563	2.26146e-12	-0.775033	0.573888	3.9973e-18	1.41126	1989	0.000380647	0.379623	0.422278	3.5696e-05	-0.378074	-0.595432	5.95112e-10	0.757697	Scaling	Scaling	Scaling	Scaling
304	DDX6	0.00863966	0.161192	4.98592	0.00193887	-0.205352	-0.652801	2.11127e-06	0.366545	1991	0.823218	0.00913909	0.417345	0.353488	-0.0466877	2.74614	0.333643	0.0558268	Buffering	Buffering	Buffering	Buffering
305	DEF6	0.0691166	0.135343	-0.652582	0.000687569	-0.2645	-0.193543	9.17265e-06	0.399843	1996	0.159295	0.110579	0.82393	0.116575	-0.188476	-0.641464	0.0214379	0.299054	Buffering	Buffering	Buffering	Scaling
306	DENND4C	6.62822e-09	0.429308	0.268042	1.2248e-32	-0.651319	-1.47678	3.7455e-30	1.08063	2009	0.000112585	0.243548	0.191014	2.40063e-07	-0.208244	-0.28439	1.21925e-09	0.451792	Buffering	Buffering	Scaling	Scaling
307	DENR	0.000398158	0.280511	-0.599399	1.612e-05	-0.467124	-0.472496	1.01735e-09	0.747635	2012	0.247732	-0.0561891	-14.7805	0.0124172	-0.147942	-0.498851	0.134125	0.0917532	Buffering	Buffering	Scaling	Scaling
308	DES	0.174417	0.175104	0.590411	0.259758	0.238722	0.929893	0.786067	-0.0636174	2018	0.88362	-0.0207396	-0.578147	0.77384	-0.0324794	-0.253708	0.93964	0.0117397	Buffering	Buffering	Buffering	Anti-Scaling
309	DFNA5	0.220105	0.166167	-0.699015	0.206279	-0.131545	-0.272499	0.0439977	0.297712	2022	0.417925	0.084033	3.72837	0.387652	-0.0615554	-0.697877	0.173926	0.145588	Buffering	Buffering	Buffering	Buffering
310	DGKA	0.930555	-0.00768603	-0.617196	0.281743	-0.080949	-0.348591	0.474031	0.0732629	2025	0.516799	0.081629	3.49299	0.685901	-0.036003	-4.62923	0.416317	0.117632	Buffering	Buffering	Buffering	Buffering
311	DHCR7	0.00021862	0.33192	-0.618517	0.0259514	-0.193191	-0.314584	2.10683e-06	0.525112	2030	0.238356	0.125303	11.8644	0.887225	0.0202426	-3.98947	0.519161	0.105061	Buffering	Buffering	Scaling	Buffering
312	DHX15	0.000497211	0.301871	0.462757	1.02646e-20	-0.462288	-0.531622	4.93566e-12	0.764159	2044	0.0100811	0.147886	0.103299	9.59717e-05	-0.125703	-0.514801	7.03283e-05	0.273589	Buffering	Buffering	Scaling	Scaling
313	DHX16	6.37676e-13	0.402693	0.845375	1.04924e-07	-0.317714	-0.23992	6.84234e-20	0.720407	2045	0.00363602	0.13912	0.278146	0.218593	-0.0685102	-0.545431	0.0016756	0.20763	Buffering	Buffering	Scaling	Scaling
314	DHX37	0.00462441	0.229304	-0.659822	0.012954	-0.172985	-0.245454	2.57317e-05	0.402289	2053	0.141176	0.120392	0.811939	0.0365472	-0.144111	-0.526574	0.00652098	0.264504	Buffering	Buffering	Buffering	Buffering
315	DIABLO	0.000206051	0.193494	0.185925	3.93379e-14	-0.433081	2.3826	3.23727e-19	0.626574	2060	0.00470491	0.240716	0.437425	1.76967e-05	-0.319489	-0.246383	3.14298e-07	0.560206	Buffering	Scaling	Buffering	Scaling
316	DIP2A	0.000158683	0.235206	-0.259108	0.000390636	-0.165526	-0.160294	6.05497e-09	0.400732	2068	9.80299e-05	0.165717	0.0590035	0.00749788	-0.122147	-0.368392	2.09852e-07	0.287863	Buffering	Buffering	Buffering	Buffering
317	DIP2B	6.96799e-08	0.457073	7.63042	0.000514185	-0.24936	-0.367815	4.23542e-12	0.706433	2069	0.0287013	0.124024	0.416316	0.0225569	-0.114313	-0.354316	0.00056276	0.238337	Buffering	Buffering	Scaling	Buffering
318	DIS3L2	0.00595954	0.200047	0.311309	0.00971357	-0.237617	0.731989	8.29673e-05	0.437664	2073	0.961338	0.00464686	4.14471	0.0100358	-0.121204	-0.141627	0.218231	0.125851	Buffering	Buffering	Buffering	Buffering
319	DLAT	8.97912e-09	0.339712	1.29759	2.97715e-11	-0.372183	-0.236224	1.1643e-20	0.711895	2075	5.07839e-06	0.297632	0.173103	2.09716e-05	-0.321348	-0.203251	2.27524e-10	0.618981	Scaling	Scaling	Scaling	Scaling
320	DNAJA1	6.7123e-07	0.422785	0.518951	1.19938e-18	-0.618161	-0.891214	1.35297e-24	1.04095	2103	0.0123575	0.126922	0.246106	6.43977e-06	-0.165743	-0.238574	1.62359e-07	0.292666	Buffering	Buffering	Scaling	Scaling
321	DNAJB5	0.130879	0.219793	0.885461	0.000338249	-0.374112	1.37347	5.59377e-05	0.593905	2113	0.68508	0.0511998	4.0917	0.213378	-0.102723	-1.81892	0.241863	0.153923	Buffering	Buffering	Buffering	Scaling
322	DNAJC10	3.01875e-06	0.431294	0.797004	0.00171089	-0.411963	-0.943584	1.46759e-07	0.843257	2116	0.00339897	0.361303	0.42954	0.72204	-0.030257	-0.674795	0.00501397	0.39156	Scaling	Buffering	Scaling	Scaling
323	DNPEP	0.305257	0.0555701	-2.75338	0.000345396	-0.287555	-0.366873	0.000154327	0.343125	2142	0.207994	0.117603	0.655182	0.000666881	-0.260263	-0.137465	0.00117493	0.377867	Buffering	Scaling	Buffering	Scaling
324	DOCK10	0.162651	-0.15961	-0.690027	0.373312	0.114297	-0.762675	0.0815741	-0.273907	2147	0.331852	-0.135225	-3.22206	0.856364	0.0144676	0.628496	0.3192	-0.149693	Anti-Scaling	Buffering	Anti-Scaling	Anti-Scaling
325	DOCK8	0.316355	0.0942524	1.39121	0.000115821	-0.319635	-6.70681	8.25661e-05	0.413888	2154	0.739684	-0.0283697	1.01543	0.042686	-0.135454	4.59669	0.202114	0.107084	Buffering	Buffering	Buffering	Scaling
326	DOPEY2	0.000315005	0.331627	1.11236	2.15588e-10	-0.406113	-0.669866	1.35795e-11	0.73774	2163	0.871988	0.0134261	6.29135	0.000154239	-0.245314	-0.363521	0.0085518	0.25874	Buffering	Buffering	Scaling	Scaling
327	DPAGT1	1.69406e-12	0.463535	1.35017	8.93522e-12	-0.396089	-0.202694	8.66634e-25	0.859624	2164	0.000798564	0.256476	0.303163	0.00740635	-0.191622	-0.393878	4.42705e-06	0.448097	Scaling	Buffering	Scaling	Scaling
328	DPF2	0.122821	0.124847	0.778593	7.80198e-05	-0.368376	-80.8984	8.747e-06	0.493223	2167	0.153599	0.103655	1.13108	0.161951	0.103513	0.969697	0.998756	0.000141855	Buffering	Anti-Scaling	Buffering	Scaling
329	DPP3	0.00475876	0.196245	-0.752538	0.0562799	-0.13206	-0.35411	8.85648e-05	0.328304	2174	0.00102964	0.190589	0.303615	0.02217	-0.128298	-0.269192	1.28962e-05	0.318887	Buffering	Buffering	Buffering	Buffering
330	DPY19L1	0.042928	0.134777	-0.375694	3.79193e-06	-0.32781	-0.22346	2.1822e-08	0.462588	2181	0.0524135	0.184384	0.365955	0.658934	-0.03545	1.56326	0.02378	0.219834	Buffering	Buffering	Buffering	Scaling
331	DRAP1	0.0104403	0.134296	-0.549816	0.00292538	-0.161256	-0.257048	5.0656e-06	0.295552	2193	0.629496	-0.037085	-14.0427	0.164597	-0.114006	-1.22086	0.439789	0.0769207	Buffering	Buffering	Buffering	Buffering
332	DSCR3	0.00166931	0.253101	-1.78302	4.66992e-11	-0.366733	-0.290868	7.3049e-11	0.619834	2200	0.102775	-0.156014	-1.1846	0.0535848	-0.066158	33.2387	0.336174	-0.0898559	Anti-Scaling	Buffering	Scaling	Scaling
333	DSP	3.24373e-10	0.569144	0.59095	0.0032033	-0.282666	7.10169	1.51934e-12	0.85181	2203	0.01167	0.234422	1.27789	0.0408407	-0.212403	-0.40146	0.000726656	0.446826	Buffering	Buffering	Scaling	Scaling
334	DST	0.753853	0.0263193	-0.298576	0.678066	-0.0469886	-0.321986	0.535854	0.0733079	2204	0.854812	0.0156828	3.15769	0.938223	0.00616256	1.62039	0.928499	0.00952026	Buffering	Buffering	Buffering	Buffering
335	DTNBP1	3.28506e-12	0.411661	0.917758	6.48109e-08	-0.43133	-0.328701	3.6858e-18	0.842991	2211	0.486572	0.0514769	7.30176	0.883637	-0.0169452	-3.47935	0.595857	0.0684221	Buffering	Buffering	Scaling	Scaling
336	DTYMK	0.25775	0.103618	-1.19293	0.00690403	-0.303376	-0.413768	0.0026968	0.406994	2216	0.046578	0.199225	0.625789	0.00527487	-0.17038	-0.113177	0.00154404	0.369605	Buffering	Buffering	Buffering	Scaling
337	DYNC1I2	6.53215e-06	0.333798	0.338817	0.000126506	-0.338676	-35.4801	3.80918e-09	0.672474	2234	0.66562	0.0243278	0.896203	0.842182	0.00937447	0.810488	0.828612	0.0149534	Buffering	Buffering	Scaling	Scaling
338	DYNC2H1	0.017644	0.223166	-356.742	0.000250083	-0.296999	-0.543595	9.99697e-07	0.520165	2237	0.142325	0.155937	0.808544	0.705487	0.0401725	1.86304	0.34886	0.115765	Buffering	Buffering	Buffering	Scaling
339	DYNLL1	0.000437583	0.214022	0.176525	0.0012707	-0.191011	0.252417	9.42687e-08	0.405033	2239	0.661323	0.0249979	2.19786	0.0364682	-0.0965224	-0.32563	0.0645188	0.12152	Buffering	Buffering	Buffering	Buffering
340	DYRK1A	0.000433571	0.175002	0.166457	4.89316e-14	-0.306082	1.62103	1.21939e-14	0.481084	2244	0.160553	0.111551	0.372111	0.00818927	-0.118308	-0.357981	0.00895174	0.229859	Buffering	Buffering	Buffering	Scaling
341	ECH1	2.80947e-05	0.473415	2.4145	0.000130275	-0.29025	-0.562847	2.30135e-09	0.763665	2258	0.0139548	0.320283	0.709553	0.696663	-0.052336	-1.70947	0.0163016	0.372619	Scaling	Buffering	Scaling	Scaling
342	EEA1	0.0174997	0.168095	10.915	5.3833e-07	-0.325735	-0.394989	1.21383e-08	0.49383	2276	0.426788	0.0587959	0.731552	0.00553424	-0.181531	-0.586793	0.00661821	0.240327	Buffering	Buffering	Buffering	Scaling
343	EED	0.000654853	0.24584	-1.41841	3.18611e-06	-0.39865	-0.462555	1.1825e-09	0.64449	2277	0.056833	0.13327	0.519674	0.633379	-0.0439448	-2.91845	0.0848318	0.177215	Buffering	Buffering	Buffering	Scaling
344	EEF1B2	0.0559343	0.203109	2.49634	6.93482e-05	-0.600331	-0.80551	4.55485e-06	0.80344	2282	0.845425	0.0171917	4.41868	0.45366	-0.0555321	-0.968684	0.505705	0.0727238	Buffering	Buffering	Buffering	Scaling
345	EEF1E1	1.43233e-07	0.344052	-0.280615	6.58745e-11	-0.591265	-0.127292	2.10882e-19	0.935317	2284	0.000180965	0.218523	0.182118	0.00177953	-0.24527	-0.283355	7.76263e-07	0.463793	Buffering	Buffering	Scaling	Scaling
346	EEF1G	0.0428561	0.148728	103.171	6.08636e-05	-0.317689	-0.673178	8.91762e-07	0.466418	2285	0.164776	0.0700925	0.468884	0.182025	-0.0872152	-1.02126	0.035066	0.157308	Buffering	Buffering	Buffering	Scaling
347	EFEMP2	0.22498	0.130762	0.836838	0.118416	-0.179017	1.51789	0.0228417	0.309779	2292	0.799426	-0.0278106	-1.97627	0.331094	0.149594	4.72657	0.287893	-0.177405	Buffering	Anti-Scaling	Buffering	Buffering
348	EFHD1	0.0464068	0.222459	-10.8764	0.364663	-0.09194	-0.674254	0.0230259	0.314399	2293	0.414242	0.112945	2.72033	0.262209	-0.169131	-1.0009	0.144852	0.282077	Buffering	Buffering	Buffering	Buffering
349	EGFR	0.00862866	0.327946	-1.98828	3.5694e-05	-0.451687	-0.459065	7.81155e-08	0.779633	2303	0.0234287	0.219335	0.896515	0.724881	0.0292054	-2.55601	0.0781945	0.19013	Buffering	Buffering	Scaling	Scaling
350	EHBP1L1	0.0678687	0.133377	-0.3102	0.00731025	-0.245783	-0.360885	0.000188129	0.37916	2306	0.443574	0.0439113	1.24	0.655839	-0.0303774	-2.19127	0.336456	0.0742887	Buffering	Buffering	Buffering	Buffering
351	EHD1	0.0050229	0.201387	0.441155	9.27312e-07	-0.365333	2.61744	1.38771e-09	0.56672	2307	0.129115	0.0708783	0.269309	0.130282	-0.0979049	-1.30856	0.0172178	0.168783	Buffering	Buffering	Buffering	Scaling
352	EHD2	0.565664	-0.0733657	-0.798858	2.82282e-06	-0.420103	-0.377293	0.0109577	0.346737	2308	0.42432	-0.130644	-8.60714	0.0769983	-0.316341	-1.79264	0.365946	0.185697	Anti-Scaling	Scaling	Buffering	Scaling
353	EHMT2	2.61139e-14	0.503907	0.839856	3.07766e-07	-0.347265	-0.249451	6.58642e-22	0.851172	2314	0.00525987	0.160797	0.466689	0.939425	-0.00461201	-0.978594	0.0229914	0.165409	Buffering	Buffering	Scaling	Scaling
354	EI24	0.000389062	0.260626	1.35802	1.69809e-12	-0.481106	-0.416012	6.56354e-15	0.741732	2315	0.0400601	0.203509	0.778644	0.00913962	-0.15535	-0.140029	0.00120107	0.358859	Buffering	Buffering	Scaling	Scaling
355	EIF2B1	0.000110545	0.253914	1.14595	9.45644e-08	-0.40046	-0.571991	1.6939e-12	0.654375	2324	0.0297933	0.111642	0.310958	0.0139885	-0.100223	-0.346735	0.000363175	0.211865	Buffering	Buffering	Scaling	Scaling
356	EIF3B	9.81549e-11	0.331685	-1.39693	1.91264e-14	-0.424303	-0.153905	6.09837e-27	0.755989	2334	0.00837014	0.108694	0.202529	0.507727	-0.0221722	1.66766	0.00708659	0.130866	Buffering	Buffering	Scaling	Scaling
357	EIF3K	2.56697e-06	0.550923	0.52759	5.60352e-11	-0.565488	-1.43568	9.17706e-15	1.11641	2343	0.175403	0.0750826	0.341907	0.58968	-0.0438198	12.0238	0.203533	0.118902	Buffering	Buffering	Scaling	Scaling
358	EIF4B	9.37517e-05	0.291488	3.72993	9.44371e-07	-0.392106	-0.486353	8.65112e-12	0.683594	2349	0.00153892	0.194955	0.26676	6.06753e-05	-0.219498	-0.221533	2.205e-07	0.414453	Buffering	Buffering	Scaling	Scaling
359	EIF5B	1.72349e-08	0.196307	0.200864	0.233215	-0.0910422	-2.13828	0.000791053	0.287349	2364	0.0489651	0.10372	0.192992	0.920509	0.00759076	1.75784	0.262951	0.0961293	Buffering	Buffering	Buffering	Buffering
360	ELMO1	0.372906	-0.0680792	4.43408	0.000442917	-0.229131	-2.19079	0.0515063	0.161051	2375	0.518787	-0.0712873	5.42943	0.359606	-0.0710533	2.3143	0.998456	-0.000234012	Buffering	Buffering	Buffering	Buffering
361	EMILIN2	0.032844	0.331824	0.611629	0.00111207	-0.286872	0.496561	0.000142225	0.618696	2403	0.473821	-0.0858663	-1.41772	0.0251418	0.204985	2.1888	0.0338786	-0.290851	Buffering	Anti-Scaling	Scaling	Scaling
362	EML2	0.00594428	0.352665	-4.44234	8.80793e-09	-0.481891	-0.338095	7.54366e-09	0.834556	2406	0.361672	0.110195	1.07078	0.0166612	-0.208902	-0.579588	0.0158459	0.319097	Buffering	Buffering	Scaling	Scaling
363	EML3	0.0113044	0.211595	-0.541801	0.00599748	-0.24089	-0.331264	6.88452e-06	0.452484	2407	0.362596	0.060373	1.36965	0.0763348	-0.1046	-0.250741	0.0141265	0.164973	Buffering	Buffering	Buffering	Buffering
364	ENDOD1	0.000915837	0.405308	0.733424	4.84257e-08	-0.596182	2.68517	3.10363e-11	1.00149	2412	0.430396	0.0582685	1.36079	0.263478	-0.0983414	-1.47595	0.131227	0.15661	Buffering	Buffering	Scaling	Scaling
365	ENOSF1	2.61076e-05	0.450148	-5.2635	2.96738e-11	-0.432867	-0.411558	2.08277e-13	0.883016	2420	0.44176	0.0966353	1.92041	0.0672435	-0.156193	-1.35986	0.0725986	0.252828	Buffering	Buffering	Scaling	Scaling
366	ENPP4	0.0050452	0.246503	0.207188	2.00821e-06	-0.545075	0.280572	3.56607e-10	0.791578	2424	0.196262	0.110753	0.800369	3.90534e-05	-0.355778	-0.178082	1.07456e-05	0.466531	Buffering	Scaling	Buffering	Scaling
367	EP400	0.000122796	0.247898	-0.791778	1.77634e-10	-0.409688	-0.186786	9.59282e-15	0.657586	2435	0.48754	0.0389292	0.756022	0.0335214	-0.087437	-0.191304	0.0200275	0.126366	Buffering	Buffering	Buffering	Scaling
368	EPB41L3	0.227562	-0.194791	-0.853323	0.194581	0.140103	-0.934668	0.0449032	-0.334894	2439	0.266593	-0.0778878	6.44114	0.855006	0.00968814	0.828574	0.229505	-0.0875759	Buffering	Buffering	Anti-Scaling	Anti-Scaling
369	EPB41L5	0.2326	0.122956	0.972254	0.0591796	-0.311709	17.8025	0.0189344	0.434665	2442	0.0248515	0.311055	0.504951	0.00855383	-0.372541	-0.345031	0.000369227	0.683596	Scaling	Scaling	Buffering	Scaling
370	EPDR1	0.830631	-0.027659	-0.998574	0.227077	-0.140804	-0.607689	0.420453	0.113145	2447	0.307804	0.231266	1.11022	0.969024	0.00672627	1.6368	0.337318	0.224539	Buffering	Buffering	Buffering	Buffering
371	EPN1	0.858996	0.0134118	1.63706	0.00294368	-0.192547	-3.02399	0.0174667	0.205959	2459	0.315509	0.0533004	0.20431	0.000199695	-0.283311	-0.320796	4.57499e-05	0.336612	Buffering	Scaling	Buffering	Buffering
372	EPS8L1	0.583932	0.0771785	0.420001	2.63496e-06	-0.501932	0.575115	0.000452565	0.57911	2467	0.596748	0.063555	1.17939	0.00107351	-0.319787	-0.379264	0.00411989	0.383342	Buffering	Scaling	Buffering	Scaling
373	ERCC1	7.06174e-06	0.341128	0.270106	1.73311e-11	-0.479695	-1.41261	6.0049e-17	0.820823	2479	0.743107	-0.058331	-2.77244	0.473528	-0.129328	-1.40576	0.738348	0.0709973	Buffering	Buffering	Scaling	Scaling
374	ERCC2	0.577562	0.0417694	1.09035	5.84423e-14	-0.533791	-0.642544	5.99452e-10	0.57556	2480	0.813692	0.0139637	0.463134	0.201459	-0.0963798	-2.34766	0.173313	0.110344	Buffering	Buffering	Buffering	Scaling
375	ERCC3	0.00780715	0.176499	1.01621	0.000267969	-0.402534	-0.710141	4.47725e-06	0.579033	2481	0.148174	0.119064	0.464954	0.226032	-0.145334	-1.0383	0.0604894	0.264398	Buffering	Buffering	Buffering	Scaling
376	ERF	0.000113098	0.419497	-3.78014	8.57076e-08	-0.360629	-0.246713	2.07313e-10	0.780126	2486	0.17336	0.320118	2.41016	0.561738	-0.0781757	-1.75731	0.111027	0.398293	Scaling	Buffering	Scaling	Scaling
377	ERMP1	0.00675864	0.273482	0.776082	2.92901e-21	-0.705889	-1.36899	9.91886e-17	0.979372	2499	0.00677989	0.225464	0.447695	6.55357e-07	-0.327691	-0.392601	1.43586e-08	0.553155	Buffering	Scaling	Scaling	Scaling
378	ERP29	8.24326e-09	0.397662	0.673894	1.20826e-12	-0.461134	-0.319884	1.89586e-21	0.858796	2501	0.0154806	0.253412	0.755371	0.0167998	-0.205265	-0.57941	0.00032243	0.458677	Scaling	Buffering	Scaling	Scaling
379	ETFB	0.693286	-0.040951	-0.301907	4.99825e-16	-0.529105	-0.108809	2.80576e-05	0.488154	2516	0.0275182	-0.156898	-0.733142	0.108786	-0.120641	-1.52351	0.683609	-0.036257	Anti-Scaling	Buffering	Buffering	Scaling
380	ETHE1	0.274033	0.126459	0.434407	4.20492e-06	-0.441103	1.0193	3.09518e-05	0.567562	2520	0.421822	-0.123728	-2.27299	0.559636	-0.0861245	-2.7804	0.841578	-0.0376031	Anti-Scaling	Buffering	Buffering	Scaling
381	EXOC2	6.80717e-06	0.309946	7.99827	0.000998117	-0.245297	-0.358136	6.61108e-10	0.555243	2532	0.814074	0.00771519	0.350993	0.90752	-0.00414564	0.276628	0.775975	0.0118608	Buffering	Buffering	Scaling	Buffering
382	EXOC3	1.36802e-17	0.394765	0.940507	7.76739e-09	-0.417146	-0.18251	2.30889e-19	0.811911	2533	0.692079	0.00927922	0.635161	0.13115	-0.0652481	-0.359647	0.10128	0.0745274	Buffering	Buffering	Scaling	Scaling
383	EXOSC3	1.09996e-05	0.304971	-123.539	4.03231e-23	-0.523852	-0.237615	2.01249e-23	0.828823	2544	0.10426	0.0773382	0.372381	0.644298	-0.0193753	24.5127	0.047148	0.0967135	Buffering	Buffering	Scaling	Scaling
384	EXOSC5	0.000451533	0.360864	2.12927	5.56363e-11	-0.507163	-0.433165	1.98842e-12	0.868027	2546	0.209287	0.0753823	0.811812	0.438044	0.0409785	1.49632	0.60527	0.0344038	Buffering	Buffering	Scaling	Scaling
385	F13A1	0.261837	-0.182968	0.482365	0.740239	0.068505	0.425351	0.254908	-0.251473	2563	0.175674	-0.164744	-2.40675	0.44368	-0.145241	-4.31836	0.923824	-0.0195036	Anti-Scaling	Buffering	Anti-Scaling	Buffering
386	FADD	0.0103447	0.140248	-0.210988	0.00118856	-0.24739	-0.283265	8.93119e-06	0.387638	2576	0.238118	0.083592	6.62652	0.657555	-0.0314309	-0.779164	0.210213	0.115023	Buffering	Buffering	Buffering	Buffering
387	FADS2	0.55373	-0.0695972	-1.30749	0.10875	0.164887	-1.33053	0.0801388	-0.234484	2578	0.525646	0.14434	3.04684	0.899825	0.021446	2.70854	0.627627	0.122894	Buffering	Buffering	Buffering	Anti-Scaling
388	FADS3	0.0234794	0.162276	-0.5343	0.858187	-0.0136306	-0.446142	0.0486521	0.175906	2579	0.262573	0.0884465	0.768222	0.302028	0.118435	1.09041	0.810331	-0.0299885	Buffering	Anti-Scaling	Buffering	Buffering
389	FAHD2A	0.362826	0.0716815	-0.501237	0.88558	-0.0184798	-0.71715	0.528882	0.0901613	2584	0.238341	0.117097	2.12117	0.185286	-0.133745	-0.437313	0.0602726	0.250842	Buffering	Buffering	Buffering	Buffering
390	FAM105A	0.000439024	0.398199	1.41919	0.00208992	-0.651745	-17.4723	4.59807e-06	1.04994	2588	0.0648685	0.157385	0.682636	0.0686749	-0.301908	-0.754912	0.0106616	0.459294	Buffering	Scaling	Scaling	Scaling
391	FAM111A	0.357412	-0.0666499	-2.92049	0.000434493	-0.292656	-1.107	0.0175228	0.226006	2590	0.539279	0.0469184	0.579277	0.323515	-0.113835	-1.54747	0.19229	0.160753	Buffering	Buffering	Buffering	Scaling
392	FAM114A1	0.153644	0.147503	6.1492	1.33317e-09	-0.366119	-0.689107	8.91645e-06	0.513622	2591	0.464988	0.0874867	0.668068	2.49376e-05	-0.268054	-0.784788	0.0107857	0.355541	Buffering	Scaling	Buffering	Scaling
393	FAM118B	0.250282	0.115705	1.85889	0.00060977	-0.283632	-4.30339	0.000439566	0.399337	2595	0.453489	0.0958282	1.28541	0.422514	-0.101916	-8.50388	0.238181	0.197744	Buffering	Buffering	Buffering	Scaling
394	FAM126A	0.148873	0.131101	-0.258275	0.421326	-0.0624448	-0.14927	0.0646189	0.193546	2601	0.36467	0.104828	0.89397	0.789783	0.0302842	1.61314	0.567152	0.0745434	Buffering	Buffering	Buffering	Buffering
395	FAM76B	1.02676e-05	0.308651	-1.19827	1.40756e-07	-0.386359	-0.282072	6.96097e-14	0.69501	2647	1.87065e-05	0.375143	0.251369	0.00917018	-0.18748	-0.343823	2.80621e-07	0.562623	Scaling	Buffering	Scaling	Scaling
396	FAM8A1	2.80989e-06	0.322566	0.822437	1.42898e-12	-0.597089	-0.363259	7.8167e-20	0.919655	2652	0.650708	0.0326857	0.799111	0.0174312	-0.137828	-0.0891057	0.0143096	0.170513	Buffering	Buffering	Scaling	Scaling
397	FAP	3.78393e-05	-1.33589	-3.99115	0.707145	0.179729	12.5609	0.00627392	-1.51562	2661	0.621949	-0.111413	-1.25808	0.0637209	0.502815	2.79186	0.0557532	-0.614228	Anti-Scaling	Anti-Scaling	Anti-Scaling	Anti-Scaling
398	FARP2	0.00903715	0.143466	0.396895	0.000455325	-0.271512	-1.16187	3.67558e-06	0.414978	2664	0.874644	0.014305	57.8194	0.969726	0.00300309	-4.19306	0.912864	0.0113019	Buffering	Buffering	Buffering	Scaling
399	FARS2	6.88909e-08	0.326391	0.543606	6.65308e-10	-0.493346	-0.418625	1.29052e-18	0.819737	2665	0.000140611	0.285871	0.376806	0.0218123	-0.270794	-0.405098	7.54019e-05	0.556666	Scaling	Scaling	Scaling	Scaling
400	FARSB	0.057921	0.1133	-0.220912	7.76844e-05	-0.276522	-0.0921514	4.97002e-06	0.389822	2667	0.284911	0.1385	1.0934	0.00114291	-0.286452	-0.181993	0.00609683	0.424953	Buffering	Scaling	Buffering	Scaling
401	FASTKD2	0.000325472	0.245757	0.296165	5.99633e-05	-0.437493	-14.7801	8.11068e-08	0.683251	2671	0.351315	0.0940505	1.93416	0.898949	-0.0152768	-2.28851	0.464569	0.109327	Buffering	Buffering	Buffering	Scaling
402	FAU	0.000836367	0.200504	0.248583	3.12252e-11	-0.441409	1.1434	6.02038e-15	0.641914	2676	0.521535	0.038643	0.903586	0.282114	-0.0802992	-1.44038	0.147002	0.118942	Buffering	Buffering	Buffering	Scaling
403	FBL	0.00068543	0.48994	-5.01082	3.72766e-07	-0.436558	-0.416853	2.29074e-08	0.926498	2678	0.649037	0.0380163	0.782413	0.0264424	-0.177163	-0.594263	0.0233981	0.21518	Buffering	Buffering	Scaling	Scaling
404	FBXL18	5.71413e-07	0.321074	-1.156	2.59199e-08	-0.378065	-0.253428	1.48213e-16	0.699139	2692	0.00156727	0.193056	0.178345	0.0489984	-0.136229	-0.958482	4.3509e-05	0.329285	Buffering	Buffering	Scaling	Scaling
405	FBXO21	0.000939598	0.426392	0.352815	1.16849e-09	-0.750681	0.487372	5.81796e-13	1.17707	2698	0.0227189	0.277139	1.01514	3.43586e-05	-0.41528	-0.241975	2.10449e-06	0.692419	Scaling	Scaling	Scaling	Scaling
406	FCGBP	0.397556	0.144198	0.483238	0.934569	0.0125091	0.769684	0.501333	0.131689	2715	0.57379	-0.0727901	-1.24374	0.450092	-0.0996247	-1.11445	0.855967	0.0268347	Buffering	Buffering	Buffering	Buffering
407	FCGRT	0.00219092	0.310869	0.159846	3.30653e-06	-0.4258	0.382375	6.45252e-10	0.736669	2720	0.0852144	0.118804	0.213794	0.679457	-0.0415702	5.12335	0.1166	0.160374	Buffering	Buffering	Scaling	Scaling
408	FCHSD2	0.00047001	0.243558	0.263093	6.70326e-07	-0.325839	0.409513	9.65756e-11	0.569397	2723	0.0808914	0.0864316	0.303149	0.739308	0.0224696	2.16325	0.38916	0.063962	Buffering	Buffering	Buffering	Scaling
409	FDX1	2.58324e-07	0.357256	0.685232	1.21047e-10	-0.522704	-0.615963	3.47139e-18	0.87996	2729	0.0391383	0.19705	0.605877	0.00260171	-0.201208	-0.304483	0.000244177	0.398258	Buffering	Buffering	Scaling	Scaling
410	FEN1	0.531188	0.0465345	-0.195532	0.0593125	-0.144265	-0.170544	0.030721	0.1908	2734	0.771475	0.0223956	-5.07826	0.634476	-0.0455957	-1.68523	0.5348	0.0679912	Buffering	Buffering	Buffering	Buffering
411	FHL2	0.355046	-0.141139	1.90742	0.24438	-0.21614	1.85896	0.738662	0.0750017	2761	0.644382	-0.0898568	-3.55222	0.726295	-0.0551329	-2.62904	0.884029	-0.0347239	Buffering	Buffering	Anti-Scaling	Buffering
412	FIBP	4.68612e-05	0.246283	0.370587	0.00199627	-0.195656	2.57031	1.5497e-08	0.441939	2765	0.151121	0.0896332	0.573916	0.425794	0.0470863	0.655695	0.56545	0.042547	Buffering	Buffering	Buffering	Buffering
413	FKBP11	0.516209	-0.0814282	-1.04483	0.067987	0.218784	-1.32852	0.0535534	-0.300213	2773	0.746836	0.0474875	58.3505	0.396235	0.121844	4.16182	0.686802	-0.0743566	Buffering	Anti-Scaling	Buffering	Anti-Scaling
414	FKBP2	0.00174513	0.228132	0.487665	3.02745e-06	-0.374835	-3.77634	9.68533e-11	0.602967	2778	0.254391	0.0692565	0.438945	0.0108896	-0.189065	-0.583829	0.00206194	0.258321	Buffering	Buffering	Buffering	Scaling
415	FKBP5	0.915166	-0.0142902	-2.51564	0.0360346	-0.303185	-0.892444	0.0696564	0.288895	2781	0.19841	0.120892	1.13048	0.941093	0.007494	2.7349	0.335924	0.113398	Buffering	Buffering	Buffering	Scaling
416	FKBP7	0.00313063	0.352425	-3.79084	0.434971	0.188376	-5.10329	0.523945	0.164049	2782	0.146098	0.255245	1.93831	0.663653	0.0782772	-31.0409	0.45026	0.176968	Scaling	Buffering	Scaling	Anti-Scaling
417	FKBP9	0.00105962	0.28416	1.22598	4.08874e-06	-0.353073	-0.982258	5.48378e-10	0.637233	2784	0.495746	0.0685754	1.98515	0.0290862	-0.168338	-0.477076	0.0251244	0.236913	Buffering	Buffering	Scaling	Scaling
418	FLOT1	0.00213137	0.214075	-3.51992	3.99594e-07	-0.444918	-0.31791	2.96984e-11	0.658993	2795	0.633738	-0.0308934	-70.5091	0.00058599	-0.217056	-0.129293	0.00481441	0.186163	Buffering	Buffering	Buffering	Scaling
419	FMNL2	0.0296135	0.197664	-4.01043	4.92766e-05	-0.450346	-0.334707	8.69665e-07	0.64801	2803	0.809466	-0.0208859	1.63834	0.727798	-0.0228155	0.744702	0.984589	0.00192962	Buffering	Buffering	Buffering	Scaling
420	FMNL3	0.000261887	0.191145	0.207967	0.0228684	-0.0987335	0.216126	1.94405e-06	0.289879	2804	0.929426	0.0058297	0.981227	0.607113	-0.0347859	2.12687	0.617584	0.0406156	Buffering	Buffering	Buffering	Buffering
421	FN1	0.027884	-0.391071	-0.719318	0.87661	-0.0431115	-1.45602	0.258169	-0.347959	2809	0.467962	-0.161689	-1.05788	0.119097	0.373968	6.91842	0.0715957	-0.535657	Anti-Scaling	Anti-Scaling	Anti-Scaling	Buffering
422	FOLR1	0.000151023	0.550391	0.570297	0.0121234	-0.473376	2.24541	2.38716e-06	1.02377	2821	0.117295	0.373104	-6.67389	0.287317	-0.269229	-1.30191	0.0454918	0.642333	Scaling	Scaling	Scaling	Scaling
423	FOLR2	0.976059	-0.0029469	0.258609	0.19108	-0.14617	0.368558	0.252819	0.143223	2822	0.151995	0.175374	5.5221	0.81347	-0.02888	-1.46785	0.181155	0.204254	Buffering	Buffering	Buffering	Buffering
424	FOXK1	5.37146e-06	0.281116	-0.78106	3.53002e-06	-0.265671	-0.188181	1.30565e-13	0.546786	2827	0.00105291	0.221769	0.199301	0.0997189	-0.0898387	-1.16831	8.87041e-06	0.311607	Buffering	Buffering	Scaling	Scaling
425	FOXP4	0.000163127	0.318818	0.544132	0.000417965	-0.343489	1.14858	1.65168e-08	0.662307	2832	0.112936	0.208855	1.07243	0.164428	-0.271916	-1.0369	0.0289048	0.480772	Buffering	Scaling	Scaling	Scaling
426	FOXRED1	0.000529895	0.273624	-0.485194	5.43374e-06	-0.304612	-0.153739	4.33188e-10	0.578236	2833	0.0654445	0.138692	0.57507	0.010494	-0.267048	-0.581922	0.000520035	0.40574	Buffering	Scaling	Scaling	Scaling
427	FRMD8	0.000600247	0.292671	0.383035	2.57912e-05	-0.409803	1.49582	2.02183e-09	0.702474	2844	0.980482	-0.00170722	-8.98803	0.196395	-0.140834	-1.23883	0.229195	0.139127	Buffering	Buffering	Scaling	Scaling
428	FRYL	0.699765	0.0290656	-4.61208	3.06128e-21	-0.505649	-0.433514	5.39626e-09	0.534715	2845	0.534993	-0.0699408	1.97579	1.65269e-06	-0.269164	-0.587791	0.100627	0.199223	Buffering	Scaling	Buffering	Scaling
429	FSCN1	0.0327152	0.260242	-1.11487	0.0563462	-0.220634	-0.559287	0.000804095	0.480876	2848	0.973902	-0.00355654	2.05411	0.0375445	-0.185805	-1.52505	0.134186	0.182248	Buffering	Buffering	Scaling	Buffering
430	FTH1	0.0790335	0.137657	0.741762	6.01856e-05	-0.339482	-6.52689	1.18204e-06	0.477138	2854	0.541366	-0.0778947	-8.21527	0.175383	0.155012	1.06706	0.140616	-0.232907	Buffering	Anti-Scaling	Buffering	Scaling
431	FTL	0.000114735	0.398588	-2.22913	4.29208e-06	-0.39804	-0.471693	1.50972e-10	0.796628	2855	0.751198	-0.0702666	-2.83088	0.989951	0.0025981	-3.52627	0.76474	-0.0728647	Buffering	Buffering	Scaling	Scaling
432	GAB2	2.27471e-05	0.434521	0.385668	0.766175	-0.0356567	0.827719	0.00105264	0.470178	2888	0.0942325	0.166742	1.66583	0.134552	-0.193389	-1.16824	0.0210188	0.360132	Buffering	Buffering	Scaling	Buffering
433	GABPA	0.000484852	0.375042	1.09963	4.9786e-07	-0.387707	-1.29087	1.33006e-09	0.762748	2891	0.173944	0.0594526	0.273639	0.155863	-0.0438526	-0.697782	0.0314163	0.103305	Buffering	Buffering	Scaling	Scaling
434	GAK	0.00291554	0.275056	2.218	1.38947e-19	-0.515235	-0.330189	1.04966e-11	0.790291	2895	0.15091	0.0920943	0.176094	8.61784e-06	-0.210903	-0.575178	0.000180806	0.302998	Buffering	Buffering	Scaling	Scaling
435	GALNT3	5.33947e-05	0.626761	0.263372	0.000580074	-0.788816	0.51978	2.59055e-07	1.41558	2910	0.00292116	0.437136	0.613651	0.154087	-0.184594	-0.383469	0.000999339	0.621729	Scaling	Buffering	Scaling	Scaling
436	GALNT4	0.825057	-0.0262267	0.612927	3.77687e-06	-0.558137	0.98524	0.000211617	0.53191	2911	0.80054	-0.0230868	-3.15855	0.0177361	-0.270633	-0.625528	0.0463226	0.247546	Buffering	Scaling	Buffering	Scaling
437	GALNT6	0.00142437	0.31283	0.322622	0.000195287	-0.369269	0.569651	2.85804e-08	0.682099	2913	0.0159545	0.27629	1.28463	0.749755	0.0375917	-2.94799	0.10006	0.238698	Scaling	Buffering	Scaling	Scaling
438	GALT	6.06457e-08	0.356656	0.530055	2.08068e-11	-0.332361	-0.479053	4.13386e-21	0.689018	2915	0.00177873	0.215507	0.280543	0.00409766	-0.156357	-0.36039	1.64171e-07	0.371864	Buffering	Buffering	Scaling	Scaling
439	GANAB	0.00693933	0.161175	-0.245969	0.0079742	-0.162585	-0.170448	1.01486e-05	0.323759	2918	0.421396	0.0359114	0.589101	0.965308	-0.00263594	2.79147	0.575357	0.0385474	Buffering	Buffering	Buffering	Buffering
440	GARS	0.000386814	0.260236	-0.373326	8.93157e-14	-0.465758	-0.102897	3.94941e-16	0.725995	2922	0.0675369	0.115246	0.374242	6.27115e-06	-0.257936	-0.215427	2.31966e-06	0.373182	Buffering	Scaling	Scaling	Scaling
441	GART	0.00430238	0.234927	-0.425382	1.38456e-08	-0.29175	-0.164812	2.17647e-08	0.526677	2923	0.0649973	0.132365	0.514001	3.58813e-05	-0.179942	-0.165201	0.000217572	0.312307	Buffering	Buffering	Buffering	Scaling
442	GCA	0.302866	0.107606	0.463639	0.00874719	-0.342347	0.63993	0.00446029	0.449953	2944	0.491877	0.0751251	3.87545	0.495574	-0.101703	-1.51831	0.31932	0.176829	Buffering	Buffering	Buffering	Scaling
443	GCC2	0.0169266	0.157937	2.76572	0.0052376	-0.352202	-0.894007	0.000272914	0.510139	2947	0.0650465	0.106571	0.233268	0.101394	-0.0896556	-0.462236	0.00983744	0.196227	Buffering	Buffering	Buffering	Scaling
444	GCLC	4.79446e-08	0.39351	1.96465	1.06447e-07	-0.539293	-0.428191	3.58625e-15	0.932803	2951	0.030624	0.15787	0.572227	0.000256313	-0.243093	-0.151723	4.84727e-06	0.400963	Buffering	Buffering	Scaling	Scaling
445	GIT2	0.00245721	0.162746	-1.88549	1.85694e-07	-0.329106	-0.333561	1.85029e-10	0.491852	3009	0.254887	-0.0664086	2.9932	0.184574	-0.0832558	14.8681	0.825364	0.0168472	Buffering	Buffering	Buffering	Scaling
446	GLDC	3.03187e-06	0.866822	1.69442	0.0229696	-0.300755	-5.93156	1.24054e-09	1.16758	3017	0.108825	0.365038	-12.7049	0.967188	-0.006546	-1.09041	0.082057	0.371584	Scaling	Buffering	Scaling	Scaling
447	GLO1	9.59566e-08	0.354953	-2.66551	6.89586e-07	-0.442775	-0.285195	2.19229e-14	0.797727	3023	0.193203	0.131957	1.21195	0.0108589	-0.202269	-0.415012	0.00398749	0.334226	Buffering	Buffering	Scaling	Scaling
448	GLS	0.165939	0.141358	-1.00245	0.000595656	-0.426869	-0.329785	0.000118678	0.568227	3030	0.989313	0.0012996	21.807	0.669781	-0.0391613	-2.09685	0.741599	0.0404609	Buffering	Buffering	Buffering	Scaling
449	GLTP	0.0849384	0.12747	1.05183	6.7423e-09	-0.480505	-0.900467	9.70163e-10	0.607975	3033	0.648215	0.0320332	0.62334	2.61394e-05	-0.283293	-0.236098	0.000170946	0.315326	Buffering	Scaling	Buffering	Scaling
450	GMDS	0.000557422	0.270459	-0.751299	9.06547e-05	-0.352692	-0.227459	3.87713e-09	0.623151	3039	0.594978	0.0526975	-69.1998	0.000384769	-0.32111	-0.160728	0.00097055	0.373808	Buffering	Scaling	Scaling	Scaling
451	GMFG	0.804516	0.0376687	-1.51831	0.18498	-0.178261	-1.51608	0.212961	0.21593	3043	0.834476	-0.0137084	0.838215	0.942441	0.00654206	1.55112	0.829337	-0.0202504	Buffering	Buffering	Buffering	Buffering
452	GMPPA	0.16231	0.0964064	-0.413881	0.163527	-0.132745	-0.326416	0.0363382	0.229151	3046	0.874633	-0.00997862	1.47417	0.486336	0.0772676	1.0324	0.47101	-0.0872462	Buffering	Buffering	Buffering	Buffering
453	GMPR	0.0417864	0.265136	0.694972	0.0181945	-0.382347	0.976777	0.00031772	0.647484	3048	0.145504	0.237928	-5.63805	0.414645	-0.122266	-0.539829	0.0711398	0.360195	Buffering	Buffering	Scaling	Scaling
454	GNE	0.00654944	0.326654	-0.56062	0.0767638	-0.150723	-0.342964	0.000103167	0.477377	3064	0.221596	0.115006	0.94391	0.50724	-0.0537071	-2.00373	0.0373675	0.168713	Buffering	Buffering	Scaling	Buffering
455	GNL1	1.10013e-11	0.492152	-1.07631	1.19263e-05	-0.376101	-0.205963	1.67132e-16	0.868254	3071	0.000266653	0.231994	0.38152	2.99536e-06	-0.274586	-0.0684516	4.51758e-10	0.506579	Buffering	Scaling	Scaling	Scaling
456	GNPDA2	0.409126	0.0945388	0.897006	1.72648e-18	-0.66192	-1.09092	2.77557e-08	0.756458	3078	0.973275	0.0034988	1.02843	0.0865212	-0.0766393	2.59401	0.460109	0.0801381	Buffering	Buffering	Buffering	Scaling
457	GNPTAB	0.0674257	0.12997	-0.733469	2.90017e-05	-0.311536	-0.321892	1.16779e-06	0.441505	3080	0.481399	-0.0797224	-2.23209	0.163046	0.1086	0.695578	0.149554	-0.188322	Buffering	Anti-Scaling	Buffering	Scaling
458	GNS	0.000193237	0.315063	1.13962	0.0866554	-0.140771	-2.73067	1.75127e-05	0.455834	3082	0.0159912	0.214247	0.744662	0.0505353	-0.152525	-0.556988	0.000919304	0.366772	Buffering	Buffering	Scaling	Buffering
459	GOLGA3	0.000106206	0.250156	0.706582	1.54061e-06	-0.33098	-0.772103	1.60398e-11	0.581136	3085	0.226775	0.0544158	0.387237	0.0198541	-0.103447	-0.428466	0.0048579	0.157863	Buffering	Buffering	Scaling	Scaling
460	GOLPH3	7.35726e-23	0.449042	0.269993	5.97748e-06	-0.372815	4.77818	3.95393e-15	0.821857	3092	0.000173111	0.183039	0.486597	0.00768454	-0.218102	-0.197239	4.79054e-05	0.401141	Buffering	Buffering	Scaling	Scaling
461	GORASP2	0.0024993	0.209072	0.699426	0.00323583	-0.208628	-1.00554	1.01508e-05	0.417699	3100	0.0113545	0.0940349	0.106108	0.466114	-0.0425027	-0.64846	0.0347397	0.136538	Buffering	Buffering	Buffering	Buffering
462	GPATCH1	2.72473e-06	0.43246	0.398352	1.21906e-06	-0.381356	-2.96974	2.50492e-12	0.813816	3111	0.00228482	0.289659	0.318953	0.207936	-0.107726	-0.392862	0.000579388	0.397384	Scaling	Buffering	Scaling	Scaling
463	GPC1	0.00717549	0.377884	7.01093	0.0156148	-0.393173	-1.00106	0.000177147	0.771057	3117	0.968091	-0.00248027	-3.95031	0.99279	-0.000978396	-15.8306	0.989527	-0.00150188	Buffering	Buffering	Scaling	Scaling
464	GPD1	0.226421	-0.0950818	-0.440203	0.819699	-0.0241524	-1.09714	0.528644	-0.0709294	3122	0.617841	0.155471	16.7116	0.780926	-0.0757555	-6.46297	0.543366	0.231227	Buffering	Buffering	Buffering	Buffering
465	GPD2	0.526297	0.0775195	0.446868	0.0163421	-0.35301	0.46752	0.016735	0.43053	3124	0.0794582	0.254489	1.26588	0.0353643	-0.254237	-0.317004	0.00471601	0.508726	Scaling	Scaling	Buffering	Scaling
466	GPI	0.0800024	0.166206	-0.850709	3.00832e-19	-0.6917	-0.228716	9.98776e-13	0.857906	3126	0.836477	0.019195	1.66913	1.88638e-07	-0.453859	-0.124408	1.74434e-05	0.473054	Buffering	Scaling	Buffering	Scaling
467	GPNMB	0.516177	-0.121861	-7.80571	0.415454	0.147544	244.606	0.227329	-0.269405	3131	0.471196	-0.109227	-1.52979	0.23664	0.156115	13.653	0.115091	-0.265342	Anti-Scaling	Anti-Scaling	Anti-Scaling	Anti-Scaling
468	GPSM3	0.426602	0.0650478	0.534945	0.237812	-0.125201	0.674247	0.0974633	0.190249	3144	0.616871	0.0629378	25.1824	0.258324	-0.141482	-0.857884	0.195965	0.20442	Buffering	Buffering	Buffering	Buffering
469	GRHPR	9.49467e-05	0.224529	0.501081	2.55603e-33	-0.599021	-0.236763	2.57211e-31	0.82355	3161	0.0813439	0.151454	0.68185	4.87181e-09	-0.296227	-0.195321	4.29398e-06	0.447681	Buffering	Scaling	Buffering	Scaling
470	GRPEL1	0.0503191	0.1469	-0.883594	2.49252e-33	-0.653587	-0.225896	1.16723e-14	0.800487	3166	0.973635	0.00337146	1.16943	2.41461e-07	-0.339297	-0.366459	0.00403019	0.342668	Buffering	Scaling	Buffering	Scaling
471	GRWD1	0.0339181	0.0958921	-0.857579	4.77045e-12	-0.308209	-0.221098	2.41878e-12	0.404101	3168	0.605186	0.0375514	0.603134	0.00160011	-0.179528	-0.281034	0.00646842	0.217079	Buffering	Buffering	Buffering	Scaling
472	GSK3A	2.08668e-06	0.38057	0.368885	1.68308e-08	-0.339118	-1.36717	2.31071e-13	0.719689	3172	0.00161822	0.183968	0.170185	0.358205	-0.0520861	-4.87339	0.00143958	0.236054	Buffering	Buffering	Scaling	Scaling
473	GSTP1	0.000214429	0.27224	0.332753	6.94605e-06	-0.313095	0.721728	1.46309e-10	0.585334	3189	0.155953	0.130093	1.38626	0.000885099	-0.284341	-0.318938	0.000393448	0.414434	Buffering	Scaling	Scaling	Scaling
474	GTF2H3	0.200504	0.106793	-1.29727	0.0321611	-0.228442	-1.0076	0.00580227	0.335235	3204	0.34957	0.0619646	1.24239	0.524524	0.0317565	1.17048	0.673448	0.0302081	Buffering	Buffering	Buffering	Buffering
475	GTF2H4	2.37693e-11	0.385234	-2.08894	1.00625e-06	-0.365917	-0.212213	7.317e-17	0.751151	3205	0.213378	0.112638	1.13046	0.513701	0.0561871	0.97741	0.591351	0.0564506	Buffering	Buffering	Scaling	Scaling
476	GTF3C3	0.00448456	0.18284	-4.45563	0.0430769	-0.233909	-0.771481	0.00142377	0.416749	3211	0.0551549	0.154693	0.423258	0.734112	-0.0251621	-1.70585	0.0782644	0.179855	Buffering	Buffering	Buffering	Buffering
477	GUF1	0.00660859	0.32044	-0.955461	2.72903e-15	-0.515631	-0.355418	4.9616e-09	0.836071	3226	0.397642	0.0820077	0.416316	0.0206383	-0.112616	-2.72491	0.0580878	0.194624	Buffering	Buffering	Scaling	Scaling
478	GYS1	0.0741306	0.16348	-1.25684	3.86583e-13	-0.438282	-0.207025	1.55567e-08	0.601761	3235	0.160724	0.138245	0.567043	0.024235	-0.229754	-0.855288	0.00373081	0.367999	Buffering	Buffering	Buffering	Scaling
479	H2AFV	0.00757274	0.176271	-1.76853	2.16811e-09	-0.374899	-0.263751	1.55984e-11	0.55117	3241	0.311285	0.0508574	0.883379	0.262443	-0.0693661	-0.905387	0.082354	0.120224	Buffering	Buffering	Buffering	Scaling
480	H2AFX	0.0145313	0.203112	-1.21379	0.0021447	-0.237579	-0.388074	1.11638e-05	0.44069	3242	0.486456	0.0382592	1.31953	0.709325	0.0226809	2.40416	0.82581	0.0155782	Buffering	Buffering	Buffering	Buffering
481	HAT1	0.0153014	0.190722	-0.433147	0.00356451	-0.381273	-0.346066	0.000128473	0.571995	3263	0.901964	-0.0125144	-1.1128	0.359687	0.124073	4.25643	0.385025	-0.136588	Buffering	Anti-Scaling	Buffering	Scaling
482	HDAC4	3.65895e-06	0.263141	-0.224593	0.00371421	-0.238391	-0.153642	3.85288e-07	0.501531	3289	0.587262	0.0612569	2.02276	0.636029	-0.0580591	-2.48252	0.453756	0.119316	Buffering	Buffering	Scaling	Buffering
483	HDLBP	2.95508e-06	0.316137	0.196718	0.00154146	-0.260364	0.461773	4.00133e-08	0.576501	3303	0.41337	0.0514154	0.463569	0.484165	0.0598029	0.701057	0.932757	-0.00838753	Buffering	Buffering	Scaling	Scaling
484	HIBADH	0.000514118	0.265648	1.44039	1.89383e-08	-0.510609	-0.754936	5.51057e-13	0.776257	3337	0.0937436	0.161805	1.34128	0.0373741	-0.20337	-0.624605	0.00260706	0.365175	Buffering	Buffering	Scaling	Scaling
485	HIBCH	0.0217651	0.232518	1.38494	0.00108946	-0.420594	-1.20043	3.16224e-05	0.653112	3338	0.269454	0.172667	11.5176	0.00370036	-0.400858	-0.226289	0.00437932	0.573524	Buffering	Scaling	Buffering	Scaling
486	HINT2	3.54564e-06	0.353464	0.324471	2.19267e-25	-0.594665	-1.59514	6.03948e-25	0.948128	3345	0.00176545	0.413544	0.813835	1.21985e-07	-0.388671	-0.306411	1.24774e-07	0.802215	Scaling	Scaling	Scaling	Scaling
487	HIP1R	0.00430862	0.267374	-6.44275	1.36876e-06	-0.407415	-0.399264	1.63083e-09	0.674789	3348	0.0252264	0.186498	0.773493	0.265882	-0.0796406	-0.754814	0.00825051	0.266138	Buffering	Buffering	Scaling	Scaling
488	HIST1H1A	0.0384591	0.347553	1.04202	0.944838	-0.0163309	1.52849	0.156289	0.363884	3351	0.0238897	0.196858	1.27701	0.771178	0.0301332	-3.33711	0.17618	0.166725	Buffering	Buffering	Scaling	Buffering
489	HIST1H1B	0.149968	0.243802	-4.56307	0.111887	-0.321767	-1.53382	0.0161824	0.565569	3352	0.0154397	0.214328	0.959061	0.223054	0.162374	2.20987	0.709949	0.051954	Buffering	Anti-Scaling	Buffering	Scaling
490	HIST1H1C	0.372239	0.18399	-2.26113	0.149404	-0.316522	-0.914471	0.0466907	0.500511	3353	0.0443273	0.190927	2.10424	0.0959794	0.229994	1.77505	0.79117	-0.0390665	Buffering	Anti-Scaling	Buffering	Scaling
491	HIST1H1D	0.499916	0.081654	-14.1429	0.102778	-0.265733	-2.47983	0.0526035	0.347387	3354	0.0371415	0.189907	1.5019	0.121094	0.194421	1.57393	0.973565	-0.00451371	Buffering	Anti-Scaling	Buffering	Scaling
492	HIST1H1E	0.379412	0.115946	-3.86625	0.134206	-0.211065	-1.07457	0.0456121	0.327011	3355	0.014131	0.243809	1.40968	0.116365	0.208037	2.0551	0.801134	0.035772	Buffering	Anti-Scaling	Buffering	Buffering
493	HIST1H2BA	0.623797	0.0458614	1.74218	0.0606166	-0.139448	0.790229	0.0867002	0.185309	3358	0.62092	0.0333082	1.98478	0.774219	0.0227153	1.90799	0.909564	0.0105929	Buffering	Buffering	Buffering	Buffering
494	HIST1H3D	0.027984	0.179225	-1.48341	0.548674	-0.0612879	-0.735209	0.0349914	0.240513	3361	0.179391	0.0652065	0.885045	0.383775	0.043531	0.766826	0.724849	0.0216755	Buffering	Buffering	Buffering	Buffering
495	HIST1H4A	0.000276029	0.246321	-0.932313	0.0480356	-0.167872	-0.365188	2.13247e-05	0.414194	3362	0.231094	0.0668339	1.88663	0.203806	0.104846	1.14075	0.672683	-0.0380123	Buffering	Anti-Scaling	Buffering	Buffering
496	HLA-A	0.27707	0.132435	1.20405	0.0220375	-0.293054	1.15607	0.00553002	0.42549	3375	0.130522	0.246172	25.8603	0.763957	0.0352014	-0.749233	0.23476	0.210971	Buffering	Buffering	Buffering	Scaling
497	HLA-B	0.547702	0.0993825	1.22212	0.248572	-0.198138	0.767051	0.151759	0.297521	3376	0.170158	0.235013	84.1255	0.794739	-0.03486	-0.733228	0.164075	0.269873	Buffering	Buffering	Buffering	Buffering
498	HLA-C	0.490246	0.0873105	0.696652	0.0978849	-0.203292	0.356387	0.0585389	0.290603	3377	0.108116	0.262682	32.4271	0.744989	-0.0413853	-0.601565	0.0994595	0.304067	Scaling	Buffering	Buffering	Buffering
499	HLA-DMA	0.711866	-0.0565159	0.510007	0.597461	-0.0765105	0.206701	0.908072	0.0199946	3378	0.0284659	0.423189	2.93772	0.285121	-0.182914	-0.471916	0.00874881	0.606102	Scaling	Buffering	Buffering	Buffering
500	HLA-DMB	0.210279	0.144101	0.181074	0.330591	-0.106605	0.0776457	0.0489589	0.250706	3379	0.134852	0.205485	21.7105	0.112701	-0.202116	-0.44032	0.0153589	0.407601	Buffering	Buffering	Buffering	Buffering
501	HLA-DPA1	0.94754	0.0106088	0.404856	0.0813288	0.236222	0.102689	0.177822	-0.225613	3381	0.194658	0.213503	-7.77373	0.290708	-0.174684	-0.662364	0.0630637	0.388187	Buffering	Buffering	Buffering	Anti-Scaling
502	HLA-DPB1	0.799172	-0.0444965	0.620936	0.286866	0.152683	0.146321	0.274284	-0.19718	3382	0.0990028	0.242221	19.2883	0.0663679	-0.236859	-0.336758	0.00472956	0.479079	Buffering	Buffering	Buffering	Anti-Scaling
503	HLA-DQA1	0.668218	0.0657873	0.629475	0.896865	-0.0236218	0.495961	0.660632	0.0894092	3383	0.338972	0.176627	-15.0094	0.157743	-0.218798	-0.528147	0.0604002	0.395426	Buffering	Buffering	Buffering	Buffering
504	HLA-DQB1	0.726095	-0.0497741	0.540588	0.99524	0.000937554	0.335003	0.775301	-0.0507116	3384	0.228546	0.189864	32.2706	0.150531	-0.202484	-0.568251	0.039308	0.392348	Buffering	Buffering	Buffering	Buffering
505	HLA-DRA	0.804858	0.0364858	0.322481	0.85285	0.0222142	0.0783535	0.925046	0.0142716	3385	0.138781	0.270428	-21.0626	0.197877	-0.186942	-0.42605	0.0274002	0.45737	Scaling	Buffering	Buffering	Buffering
506	HLA-DRB5	0.926463	0.0131993	0.323928	0.726418	0.0457852	0.117098	0.837974	-0.0325859	3389	0.158618	0.265445	-4.05419	0.208039	-0.272757	-0.746495	0.0390012	0.538202	Scaling	Scaling	Buffering	Buffering
507	HLA-E	0.368102	0.116646	1.20658	0.066313	-0.24663	0.932736	0.0251387	0.363276	3390	0.124817	0.252485	8.08713	0.288822	-0.177981	-0.87397	0.0402235	0.430467	Scaling	Buffering	Buffering	Buffering
508	HLA-F	0.372141	0.108832	0.748409	0.0982411	-0.204772	0.455342	0.0385246	0.313604	3391	0.64239	0.0794361	-4.73864	0.858244	-0.0230592	-0.591078	0.563566	0.102495	Buffering	Buffering	Buffering	Buffering
509	HLCS	0.000151542	0.286911	0.696198	1.93673e-14	-0.416215	-0.54567	4.2033e-14	0.703126	3392	0.00900203	0.234099	0.357823	0.0315229	-0.117553	-0.340225	0.000406485	0.351652	Buffering	Buffering	Scaling	Scaling
510	HMBS	3.38893e-05	0.294631	-0.312582	5.2096e-08	-0.389032	-0.154185	2.20883e-13	0.683663	3396	0.00153304	0.234001	0.413535	0.055795	-0.156129	-0.647861	0.000225577	0.39013	Buffering	Buffering	Scaling	Scaling
511	HMGA1	4.24231e-07	0.352697	-0.858485	8.81353e-05	-0.409452	-0.352908	1.67075e-10	0.762148	3401	0.386723	0.0973636	1.56047	5.07942e-06	-0.554271	-0.202375	5.16427e-06	0.651634	Buffering	Scaling	Scaling	Scaling
512	HMGA2	0.00193164	0.803406	-2.9572	0.0219917	-0.544026	-1.08677	1.87911e-05	1.34743	3402	0.00188501	0.908741	7.00878	0.286336	-0.285867	-1.15118	0.000931321	1.19461	Scaling	Scaling	Scaling	Scaling
513	HMGCS1	1.84571e-09	0.42835	-0.415678	0.301323	-0.129754	-0.266917	6.04762e-05	0.558105	3408	0.0841196	0.20213	6.79099	0.00242598	-0.35693	-0.14484	4.70459e-05	0.559059	Buffering	Scaling	Scaling	Buffering
514	HMGN1	0.000151867	0.29968	1.04871	9.96865e-13	-0.425746	-0.525133	8.80419e-14	0.725427	3410	0.000523309	0.273312	0.102334	2.06867e-06	-0.398617	-0.370805	6.24599e-11	0.671929	Scaling	Scaling	Scaling	Scaling
515	HMGN4	0.000201296	0.268027	0.780912	6.29529e-09	-0.490282	-0.663312	2.08446e-14	0.75831	3413	0.355629	0.12367	2.62053	0.330539	-0.196157	-2.4865	0.13866	0.319827	Buffering	Buffering	Scaling	Scaling
516	HNMT	0.470553	-0.13986	-4.06322	0.275586	-0.233626	-2.27241	0.7325	0.0937662	3420	0.744447	-0.0470581	5.45113	0.425982	0.0654092	0.352341	0.474199	-0.112467	Buffering	Buffering	Anti-Scaling	Buffering
517	HNRNPA1	0.125049	0.111292	-0.792413	4.55016e-06	-0.365696	-0.358244	5.51385e-07	0.476987	3422	0.0680808	0.100711	0.47811	0.0112063	-0.144622	-0.353995	0.000676208	0.245333	Buffering	Buffering	Buffering	Scaling
518	HNRNPA2B1	0.0713644	0.182498	-0.529614	0.422453	-0.0710378	-0.289155	0.0279635	0.253536	3423	0.0123253	0.103498	0.221655	0.0147985	-0.100982	-0.302453	8.37289e-05	0.20448	Buffering	Buffering	Buffering	Buffering
519	HNRNPL	0.262259	0.103889	3.32593	0.140106	-0.120572	-3.07076	0.0359704	0.224461	3434	0.128266	0.0641374	0.302153	0.49927	0.0376858	1.06563	0.663321	0.0264516	Buffering	Buffering	Buffering	Buffering
520	HSD17B8	0.0103734	0.260901	1.35146	1.90778e-08	-0.6889	-1.03526	1.14254e-11	0.949801	3482	0.87933	0.0179869	-5.22843	0.00482322	-0.286469	-0.219741	0.0180612	0.304456	Buffering	Scaling	Scaling	Scaling
521	HSP90AB1	8.91372e-08	0.322321	4.11088	4.4873e-06	-0.340822	-0.295135	6.38788e-14	0.663143	3488	0.0568763	0.0769702	0.285872	0.00245445	-0.120584	-0.14718	6.11853e-05	0.197555	Buffering	Buffering	Scaling	Scaling
522	HSP90B1	6.17962e-08	0.367038	0.548194	7.99188e-09	-0.419665	-0.5891	2.40034e-17	0.786702	3489	0.00830009	0.21992	0.489642	0.125105	-0.0868954	-0.842047	0.000929308	0.306816	Buffering	Buffering	Scaling	Scaling
523	HSPA1A	0.86456	-0.036336	-74.8964	0.262454	0.234853	7.02051	0.293772	-0.271189	3494	0.103236	0.112404	1.60048	0.0966697	-0.140189	-0.419903	0.0111165	0.252593	Buffering	Buffering	Buffering	Anti-Scaling
524	HSPA8	0.496517	0.0656362	-1.00624	0.22543	-0.105993	-0.536815	0.126774	0.171629	3500	0.601326	-0.0163531	0.349578	0.00664045	-0.0794501	-0.621514	0.0736694	0.063097	Buffering	Buffering	Buffering	Buffering
525	HSPB6	0.147128	0.133135	4.33535	0.651698	0.0309694	-7.22159	0.291679	0.102166	3504	0.12602	0.282711	1.19863	0.0509741	-0.433534	-1.0467	0.00425877	0.716245	Scaling	Scaling	Buffering	Buffering
526	HSPBP1	0.0155101	0.187319	1.0861	9.68043e-07	-0.315906	-0.755305	4.51289e-08	0.503224	3507	0.0413196	0.190377	0.284343	0.00885067	-0.321695	-0.897177	0.000243749	0.512071	Buffering	Scaling	Buffering	Scaling
527	HSPD1	0.0745134	0.133579	-0.519836	0.00185824	-0.394699	-0.380809	0.000198852	0.528278	3508	0.463424	0.0914799	13.1605	0.0192391	-0.215965	-0.207303	0.0377008	0.307445	Buffering	Buffering	Buffering	Scaling
528	HSPE1	0.0551229	0.174933	12.5392	0.0391872	-0.30531	-1.2664	0.00438612	0.480244	3509	0.264344	0.168636	2.52914	2.10979e-05	-0.402968	-0.0867543	0.00162039	0.571604	Buffering	Scaling	Buffering	Scaling
529	HUS1	0.207462	0.0912039	1.57604	1.56722e-10	-0.474091	-0.659762	3.53289e-10	0.565295	3519	0.99172	0.000697749	-0.718908	0.654586	-0.0271955	-0.352323	0.67533	0.0278932	Buffering	Buffering	Buffering	Scaling
530	HYOU1	1.00804e-06	0.301804	-0.643676	0.0763523	-0.0966626	-0.208121	3.59331e-08	0.398467	3523	0.000553208	0.245257	0.251922	0.0494823	-0.139664	-0.507559	1.00223e-05	0.38492	Buffering	Buffering	Scaling	Buffering
531	ICA1	5.43507e-07	0.516713	0.429989	3.24317e-09	-0.601038	2.46247	3.02287e-17	1.11775	3530	0.673432	0.0463183	1.18925	0.465332	-0.0891826	-3.1937	0.33847	0.135501	Buffering	Buffering	Scaling	Scaling
532	IDH1	0.191523	0.124559	-53.3346	0.009186	-0.330701	-0.855972	0.00258973	0.45526	3538	0.119173	0.232758	1.33399	0.00296702	-0.283224	-0.17092	0.00353037	0.515982	Buffering	Scaling	Buffering	Scaling
533	IDUA	0.84028	0.034817	0.870506	5.07386e-10	-0.491026	1.19385	0.00353705	0.525843	3546	0.163175	0.226029	0.93035	0.000617579	-0.236053	-0.551021	0.0104337	0.462083	Buffering	Buffering	Buffering	Scaling
534	IFIH1	0.121672	-0.313053	0.98166	0.426472	-0.159412	0.497914	0.566679	-0.153641	3553	0.0668947	-0.2778	-0.625489	0.76121	0.0435774	-13.7629	0.101066	-0.321378	Anti-Scaling	Buffering	Anti-Scaling	Buffering
535	IFT74	5.82946e-10	0.506592	0.231401	5.98691e-16	-0.533619	2.70495	3.90557e-27	1.04021	3573	0.0285798	0.162927	0.479643	0.103193	-0.0834504	-0.792605	0.000685461	0.246378	Buffering	Buffering	Scaling	Scaling
536	IFT81	8.63709e-06	0.325657	1.15211	4.89154e-13	-0.448774	-0.268667	1.1166e-17	0.774431	3575	0.0823843	0.165512	0.623489	0.465963	-0.060191	-15.1203	0.0296046	0.225703	Buffering	Buffering	Scaling	Scaling
537	IGF2BP3	0.00219994	0.681497	-2.04416	0.00120464	-0.620064	-0.66631	4.22005e-07	1.30156	3583	0.176051	0.354991	50.0324	0.0231954	-0.475155	-0.78125	0.00483167	0.830147	Scaling	Scaling	Scaling	Scaling
538	IGFBP2	0.140448	0.277291	2.34473	0.040482	-0.585848	-10.6596	0.00823657	0.863139	3586	0.23131	0.224671	-15.4994	0.0138727	-0.302005	-0.174397	0.0137574	0.526675	Buffering	Scaling	Scaling	Scaling
539	IGFBP3	0.0864147	0.20539	-0.502901	0.738231	-0.0324919	-0.237856	0.0706877	0.237882	3587	0.869277	0.0298242	-3.96979	0.268826	-0.165091	-1.04129	0.354482	0.194915	Buffering	Buffering	Buffering	Buffering
540	IL18	0.0106582	0.378643	0.691884	4.67264e-05	-0.746207	3.50456	6.37081e-08	1.12485	3621	0.852482	0.0234061	-3.81037	0.0141944	-0.361728	-0.617276	0.0161772	0.385134	Buffering	Scaling	Scaling	Scaling
541	IL4I1	0.88897	0.0203971	0.192041	0.0953619	-0.210329	0.27888	0.18073	0.230726	3625	0.565586	-0.104439	-1.35582	0.314722	-0.152221	-0.669156	0.803953	0.0477819	Anti-Scaling	Buffering	Buffering	Buffering
542	ILKAP	0.147339	0.107185	0.66114	0.00977476	-0.232701	5.67729	0.00194121	0.339886	3631	0.0901084	0.157579	0.53275	0.168325	-0.114773	-0.535989	0.0210243	0.272352	Buffering	Buffering	Buffering	Buffering
543	IMPA2	0.000540562	0.44772	-5.41881	7.83141e-11	-0.474202	-0.474308	1.21362e-10	0.921922	3638	0.019711	0.55417	0.690403	0.541308	-0.113555	-3.3688	0.0137748	0.667725	Scaling	Buffering	Scaling	Scaling
544	INPPL1	0.000501071	0.311893	-1.16376	0.579343	-0.0497873	-0.579637	0.000994202	0.36168	3663	0.0642397	0.137618	1.54713	0.896401	0.0109115	-2.13144	0.225871	0.126707	Buffering	Buffering	Scaling	Buffering
545	INTS1	2.06919e-08	0.331193	-0.435747	1.39733e-08	-0.35392	-0.169352	6.39288e-19	0.685113	3665	0.0187258	0.127327	0.316918	0.976706	0.00101985	0.572181	0.0239123	0.126307	Buffering	Buffering	Scaling	Scaling
546	INTS4	2.76866e-11	0.415314	-11.1392	0.205852	0.164529	-4.22129	0.0681448	0.250785	3673	0.0486822	0.0826961	0.318784	0.824002	-0.0132146	-16.5649	0.156646	0.0959107	Buffering	Buffering	Scaling	Anti-Scaling
547	INTS5	0.0269501	0.121969	-4.32699	2.77546e-07	-0.276988	-0.295366	3.08748e-09	0.398958	3674	0.0305057	0.100225	0.218461	0.842549	0.0138148	1.17212	0.256761	0.0864102	Buffering	Buffering	Buffering	Scaling
548	IRAK4	0.58828	0.0488509	-8.5273	0.18292	-0.140464	-2.53586	0.129908	0.189315	3696	0.292413	0.0878755	1.20155	0.812694	0.015051	1.56753	0.44978	0.0728245	Buffering	Buffering	Buffering	Buffering
549	IRF2BP1	0.000254888	0.335963	0.190948	0.000627124	-0.252509	0.399232	3.88458e-08	0.588472	3699	0.00284951	0.260974	0.293205	0.0182059	-0.180127	-0.462846	3.50258e-05	0.441101	Scaling	Buffering	Scaling	Scaling
550	IRF3	0.000691643	0.353775	1.9284	1.19073e-06	-0.315112	-0.412184	7.22285e-09	0.668888	3702	0.0414649	0.20441	0.366771	0.0102412	-0.206096	-0.398414	0.000118484	0.410505	Buffering	Buffering	Scaling	Scaling
551	IRGQ	0.641715	0.0242219	1.10274	0.199239	-0.0830077	-12.7952	0.150769	0.10723	3707	0.107656	0.131337	0.463181	0.102891	-0.217548	-1.31132	0.0153394	0.348886	Buffering	Buffering	Buffering	Buffering
552	ISCU	3.57429e-09	0.365409	0.24755	4.71517e-11	-0.437153	-2.32987	1.5844e-20	0.802562	3713	0.00417498	0.196085	0.298145	2.64854e-05	-0.255042	-0.182034	7.76943e-08	0.451127	Buffering	Scaling	Scaling	Scaling
553	ISOC2	0.0452192	0.22083	0.685886	6.94748e-15	-0.635465	-1.44319	1.15608e-10	0.856294	3719	0.715279	-0.0394941	11.6779	0.00110719	-0.364707	-0.44234	0.0166899	0.325212	Buffering	Scaling	Buffering	Scaling
554	ITGA5	0.275706	-0.0940376	-0.2453	0.0319093	0.199907	-0.33939	0.00844539	-0.293944	3733	0.590985	-0.0616824	-4.95643	0.822304	0.0289646	6.59285	0.555734	-0.0906469	Buffering	Buffering	Buffering	Anti-Scaling
555	ITGA6	0.512057	0.102919	158.466	0.00249897	-0.492747	-1.05068	0.00506646	0.595666	3734	0.139137	0.202824	1.21662	0.00587375	-0.287437	-0.218468	0.00336215	0.490261	Buffering	Scaling	Buffering	Scaling
556	ITGA7	0.0078636	0.294968	0.736526	1.11525e-12	-0.72056	-2.32177	4.58692e-14	1.01553	3735	0.450599	0.105599	1.09853	0.0202128	-0.284926	-0.661375	0.0173657	0.390526	Buffering	Scaling	Scaling	Scaling
557	ITGAV	0.444619	-0.108322	4.10987	0.39138	-0.183086	8.48955	0.757946	0.0747635	3739	0.433136	-0.0744699	-0.787572	0.651282	0.0711272	8.6015	0.405916	-0.145597	Buffering	Buffering	Anti-Scaling	Buffering
558	ITGB2	0.198879	-0.195205	0.871257	0.00295849	-0.359451	1.3069	0.333364	0.164246	3743	0.0294621	-0.34599	-0.905284	0.378032	-0.0936741	-8.78871	0.136127	-0.252316	Anti-Scaling	Buffering	Anti-Scaling	Scaling
559	ITGB6	0.014064	-0.497709	1.06127	0.243099	-0.344932	1.27067	0.650042	-0.152777	3747	0.39468	-0.0770229	-5.52867	0.65218	0.0598971	1.36694	0.362214	-0.13692	Buffering	Buffering	Anti-Scaling	Scaling
560	ITGB8	0.000201161	0.416374	0.288032	0.00401903	-0.335078	0.449886	1.80362e-07	0.751452	3748	0.0601215	0.213443	2.46382	0.145651	0.201922	5.44558	0.939536	0.0115204	Buffering	Anti-Scaling	Scaling	Scaling
561	ITPR3	0.280577	0.108202	-9.77899	0.00291076	-0.310173	-0.743932	0.000779829	0.418375	3765	0.0395335	-0.108653	-1.17653	0.00124884	-0.204151	-0.246958	0.141956	0.0954982	Anti-Scaling	Buffering	Buffering	Scaling
562	ITSN1	3.03111e-05	0.268579	-2.58947	2.60904e-07	-0.267311	-0.322059	1.25425e-12	0.53589	3768	0.0159611	0.146276	0.170881	0.0134548	-0.109614	-0.752083	0.000260957	0.255889	Buffering	Buffering	Scaling	Scaling
563	IWS1	0.00351663	0.210856	6.56109	8.10839e-06	-0.466122	-0.337306	3.03128e-08	0.676979	3773	0.285755	-0.115678	-4.78749	0.00120767	-0.188514	-0.187153	0.510153	0.072836	Anti-Scaling	Buffering	Buffering	Scaling
564	JAK2	0.000312049	0.312248	38.9567	1.27444e-13	-0.505049	-0.545737	1.40603e-15	0.817297	3779	0.118175	0.190094	0.80257	0.601406	-0.0378139	3.56479	0.0686635	0.227908	Buffering	Buffering	Scaling	Scaling
565	KCTD10	0.0240332	0.127291	0.277286	3.5475e-06	-0.309136	1.42213	2.69525e-08	0.436427	3818	0.407302	-0.0452936	8.96559	0.740838	-0.0225743	2.24074	0.75943	-0.0227193	Buffering	Buffering	Buffering	Scaling
566	KCTD14	0.148391	0.206123	0.536968	0.0520618	-0.379232	1.60328	0.00618892	0.585355	3820	0.225318	-0.237033	-1.71922	0.226148	-0.316299	-2.51081	0.783789	0.0792655	Anti-Scaling	Scaling	Buffering	Scaling
567	KCTD15	0.729173	-0.0377477	-0.844945	0.00183021	-0.270375	-0.618076	0.0584726	0.232628	3821	0.849138	-0.0278584	-1.53646	0.849543	0.0371809	-5.41562	0.764854	-0.0650393	Buffering	Buffering	Buffering	Scaling
568	KCTD21	0.0261751	0.100865	3.34953	0.0037029	0.193677	2.06112	0.19583	-0.0928124	3823	0.119134	0.119229	1.82736	0.624352	0.0741497	41.6671	0.779352	0.0450789	Buffering	Buffering	Buffering	Anti-Scaling
569	KDELC2	0.0466122	0.204564	-1.26924	0.000196007	-0.333766	-0.378178	1.07445e-05	0.53833	3827	0.503777	0.0534634	1.39389	0.577738	-0.0365963	-4.29245	0.29055	0.0900596	Buffering	Buffering	Buffering	Scaling
570	KDELR1	0.0690765	0.136566	0.298901	1.30658e-14	-0.461055	2.63717	6.58842e-11	0.597621	3828	0.0173652	0.464932	0.74205	0.335076	-0.189083	-2.69356	0.00887331	0.654015	Scaling	Buffering	Buffering	Scaling
571	KIAA1161	0.117375	0.145124	-72.091	4.18054e-08	-0.387662	-0.747838	7.05604e-08	0.532786	3862	0.688395	-0.0493388	1655.68	0.000222109	-0.384177	-0.283095	0.0150701	0.334838	Buffering	Scaling	Buffering	Scaling
572	KIF13A	6.68363e-06	0.415077	-2.82001	0.00200023	-0.435955	-0.717205	3.49564e-08	0.851032	3875	0.876473	0.00835054	1.29512	0.432648	-0.0574115	-1.5486	0.410496	0.0657621	Buffering	Buffering	Scaling	Scaling
573	KIF1A	0.000532885	0.656146	0.982023	0.604518	-0.120976	1.90841	0.00688094	0.777122	3880	0.0119462	0.35819	0.54219	0.80632	-0.0410043	-4.39618	0.0575694	0.399195	Scaling	Buffering	Scaling	Buffering
574	KIF21A	0.302911	0.117347	-59.3587	0.00127457	-0.375166	-1.40018	0.000936804	0.492512	3886	0.487461	0.065139	5.32512	0.835894	-0.0166091	-2.29896	0.476766	0.081748	Buffering	Buffering	Buffering	Scaling
575	KIF5A	0.618654	-0.0343806	-1.58713	0.943584	-0.00470181	-1.6511	0.725281	-0.0296788	3894	0.289837	0.0572227	0.495146	0.560547	-0.0226363	0.679615	0.153326	0.079859	Buffering	Buffering	Buffering	Buffering
576	KIF5C	0.0148012	0.202626	0.366149	0.0994009	-0.176746	0.709339	0.00297348	0.379372	3896	0.018761	0.171256	0.227033	0.112799	0.102305	0.236303	0.412883	0.0689506	Buffering	Anti-Scaling	Buffering	Buffering
577	KIFC1	1.76977e-06	0.448473	-0.719585	0.0575312	-0.214183	-0.320127	1.11412e-07	0.662657	3898	0.283025	0.145554	-6.72852	0.192815	0.154537	-2.99158	0.949551	-0.00898284	Buffering	Anti-Scaling	Scaling	Buffering
578	KLC2	0.0573949	0.056243	0.156959	0.237723	-0.0362622	0.232089	0.0117777	0.0925053	3902	0.031163	0.125443	0.514806	0.275794	0.0406295	0.474483	0.172442	0.0848132	Buffering	Buffering	Buffering	Buffering
579	KLC3	0.0597363	0.135747	-0.994676	0.975844	-0.00186765	-0.715298	0.0807893	0.137615	3903	0.225192	0.10173	0.546525	0.453077	-0.0651952	-2.13153	0.0795027	0.166925	Buffering	Buffering	Buffering	Buffering
580	KLC4	1.49985e-09	0.259419	0.801402	5.12431e-08	-0.296398	-0.225382	3.29381e-17	0.555817	3904	0.0352428	0.126971	0.476561	0.00367518	-0.151912	-0.222771	0.000136937	0.278883	Buffering	Buffering	Scaling	Scaling
581	KLK10	0.812669	-0.0514018	0.417598	0.0134889	-0.375739	0.35204	0.168886	0.324338	3915	0.777378	0.029707	2.1381	0.0333038	-0.389125	-0.901407	0.0249263	0.418832	Buffering	Scaling	Buffering	Scaling
582	KLK6	0.12021	-0.452015	0.851138	0.267857	-0.18757	0.352303	0.366286	-0.264444	3917	0.572403	-0.11181	-6.56365	0.128741	-0.274016	-1.6084	0.476121	0.162206	Anti-Scaling	Scaling	Anti-Scaling	Buffering
583	KLK7	0.573465	-0.138327	0.390783	0.241192	-0.176194	0.207774	0.881464	0.0378667	3918	0.234262	-0.28639	-2.62221	0.112783	-0.336896	-1.47519	0.85457	0.0505064	Anti-Scaling	Scaling	Anti-Scaling	Buffering
584	KLK8	0.786444	-0.058432	0.299541	0.0699224	-0.217033	0.108879	0.460608	0.158601	3919	0.625537	-0.0990639	7.16562	0.315987	-0.285419	-4.54422	0.546327	0.186355	Buffering	Scaling	Buffering	Buffering
585	KNTC1	0.508409	0.0601323	-0.243101	6.4734e-06	-0.47144	-0.22671	7.12658e-06	0.531572	3929	0.597928	-0.0457443	2.74859	0.088905	-0.199082	-1.47969	0.211495	0.153338	Buffering	Buffering	Buffering	Scaling
586	KRR1	6.40656e-09	0.26848	9.25312	8.40776e-15	-0.523848	-0.228435	1.1704e-23	0.792328	3940	0.818664	-0.0159378	-2.09061	0.31087	-0.0748379	-0.81627	0.49646	0.0589001	Buffering	Buffering	Scaling	Scaling
587	KRT1	0.711517	-0.0273011	-0.890462	0.732247	0.0304152	-1.73243	0.561485	-0.0577163	3941	0.096987	0.169147	1.36972	0.0541692	-0.170576	-0.52624	0.00447932	0.339722	Buffering	Buffering	Buffering	Buffering
588	KRT18	0.00942518	0.279378	-1.69202	2.06254e-11	-0.746675	-0.359303	2.0467e-13	1.02605	3948	0.018103	0.270343	1.37178	0.00304203	-0.402559	-0.468959	2.47447e-05	0.672902	Scaling	Scaling	Scaling	Scaling
589	KRT2	0.0310753	-0.0838572	-0.670001	0.163235	-0.0613915	-1.23264	0.633077	-0.0224657	3950	0.419741	0.0980985	-13.3361	0.150206	-0.163226	-0.597289	0.0578103	0.261325	Buffering	Buffering	Buffering	Buffering
590	KRT4	0.858586	-0.0351259	0.912426	0.00943769	-0.464181	0.781428	0.0542046	0.429055	3954	0.471178	0.0734142	-3.92541	0.156917	-0.185318	-0.932217	0.0818132	0.258732	Buffering	Buffering	Buffering	Scaling
591	KRT5	0.134999	-0.246186	-0.689521	0.518943	-0.109127	-0.771813	0.472447	-0.13706	3955	0.734939	0.0511187	-1.28275	0.28414	-0.189185	-0.912818	0.218463	0.240303	Buffering	Buffering	Anti-Scaling	Buffering
592	KRT6A	0.138459	-0.349495	-2.09494	0.390131	-0.183406	-1.70912	0.533403	-0.166089	3956	0.25603	0.136494	6.33667	0.0120545	-0.301692	-0.469349	0.00262156	0.438186	Buffering	Scaling	Anti-Scaling	Buffering
593	KRT7	0.319817	0.130074	0.344704	0.0922914	-0.255317	0.572824	0.0254792	0.385391	3957	0.646191	0.067654	-3.42634	0.358016	-0.148732	-1.33781	0.281924	0.216386	Buffering	Buffering	Buffering	Scaling
594	KRT75	0.00668019	-0.206971	-1.01667	0.751168	-0.0244302	-3.22352	0.0421722	-0.182541	3960	0.104217	0.159179	1.39824	0.00830589	-0.277099	-0.395952	0.000267117	0.436278	Buffering	Scaling	Anti-Scaling	Buffering
595	KRT8	0.00070698	0.294547	-8.73386	7.25599e-09	-0.593599	-0.502451	5.01583e-13	0.888147	3963	0.0100035	0.290177	0.96218	0.000412338	-0.436707	-0.357735	1.5508e-06	0.726884	Scaling	Scaling	Scaling	Scaling
596	KRT80	0.420438	0.114262	-1.69106	0.0169127	-0.305074	-0.736653	0.0139957	0.419336	3964	0.473905	0.102114	-5.17354	0.54367	-0.075356	-0.977693	0.299152	0.17747	Buffering	Buffering	Buffering	Scaling
597	KYNU	0.0484851	-0.261194	-0.297935	0.509654	0.0924485	-0.222533	0.0492356	-0.353643	3974	0.122012	-0.252322	-1.15394	0.0346363	0.383915	0.563943	0.00524738	-0.636237	Anti-Scaling	Anti-Scaling	Anti-Scaling	Buffering
598	LAIR1	0.800013	-0.0424664	1.48574	0.450506	-0.111364	2.36349	0.720477	0.0688981	3985	0.828807	-0.0287985	4.04799	0.373663	0.138798	0.914152	0.295594	-0.167597	Buffering	Anti-Scaling	Buffering	Buffering
599	LAMA1	0.00346901	0.38755	-0.731338	0.0710096	-0.130525	-0.228783	9.31585e-05	0.518074	3986	0.300356	0.46936	7.62711	0.432121	0.133384	-5.99154	0.454792	0.335976	Scaling	Anti-Scaling	Scaling	Buffering
600	LANCL1	0.280294	0.0920862	-0.96042	0.0220021	-0.25751	-0.45391	0.00866508	0.349597	4004	0.0670237	0.139355	0.343848	0.00996251	-0.161406	-0.207371	0.00164751	0.300761	Buffering	Buffering	Buffering	Scaling
601	LANCL2	0.000864948	0.216319	0.53666	6.67556e-08	-0.378104	-1.57745	4.66444e-12	0.594424	4005	0.00711959	0.177832	0.50025	0.0272976	-0.135176	-0.327734	9.75892e-05	0.313008	Buffering	Buffering	Buffering	Scaling
602	LAP3	0.0215984	0.346991	0.450931	4.67833e-11	-0.569464	2.68322	2.08116e-07	0.916455	4006	0.227116	0.144247	0.572818	0.020747	-0.187947	-1.58581	0.0136081	0.332194	Buffering	Buffering	Scaling	Scaling
603	LARP4	0.000167723	0.245936	-2.77851	5.39608e-05	-0.242599	-0.292883	1.27406e-09	0.488535	4010	0.559656	0.0536803	1.94581	0.095418	-0.104476	-0.515432	0.104361	0.158157	Buffering	Buffering	Buffering	Buffering
604	LEMD2	0.000112726	0.239488	0.734067	1.11834e-06	-0.326106	-0.736127	5.53577e-12	0.565595	4038	0.550504	0.0387234	0.937539	0.0182326	-0.20649	-0.536617	0.0122212	0.245213	Buffering	Buffering	Buffering	Scaling
605	LEMD3	0.000139614	0.254481	0.55976	1.10615e-07	-0.4632	-1.09716	2.049e-12	0.717681	4039	0.243583	0.0737363	0.873738	0.00131478	-0.121892	-0.177311	0.0052732	0.195629	Buffering	Buffering	Scaling	Scaling
606	LENG8	0.0206416	0.15262	0.472082	0.692438	0.0216894	1.05269	0.0900275	0.130931	4041	0.35016	-0.0609342	0.503886	0.35813	-0.093103	6.82724	0.737853	0.0321688	Buffering	Buffering	Buffering	Buffering
607	LETM1	0.000156698	0.400345	-0.675185	8.83966e-08	-0.35399	-0.460883	1.25658e-09	0.754335	4044	0.639011	0.0398074	0.971711	0.00110264	-0.251652	-0.903522	0.00656664	0.291459	Buffering	Scaling	Scaling	Scaling
608	LETMD1	0.000299342	0.30235	475.003	1.41e-07	-0.479774	-0.491828	7.28028e-12	0.782125	4045	0.00136788	0.260359	0.278548	0.053242	-0.143996	-0.550378	4.44563e-05	0.404354	Scaling	Buffering	Scaling	Scaling
609	LIG1	0.000126953	0.379957	-0.582304	1.73848e-08	-0.421382	-0.216378	5.76937e-12	0.801339	4059	0.00150334	0.409446	0.578474	0.360827	-0.0744217	-0.525471	0.000488284	0.483868	Scaling	Buffering	Scaling	Scaling
610	LIMA1	0.254137	0.105591	-0.904454	0.00310553	-0.315959	-0.632488	0.000659619	0.42155	4064	0.600657	0.0335895	1.03999	0.0124244	-0.182476	-0.511321	0.0106972	0.216066	Buffering	Buffering	Buffering	Scaling
611	LIMS1	0.0977422	-0.165146	0.583843	0.00430889	-0.314216	0.456104	0.262251	0.14907	4070	0.279276	-0.0733337	-4.32247	0.181165	-0.0626999	-43.9585	0.882715	-0.0106338	Buffering	Buffering	Anti-Scaling	Scaling
612	LMAN2L	0.000805288	0.323042	0.423363	0.175951	-0.175773	1.03618	0.00147026	0.498814	4084	0.0361498	0.266889	0.602987	0.0513558	-0.11403	-0.217407	0.00620835	0.380919	Scaling	Buffering	Scaling	Buffering
613	LPXN	0.518116	0.0528143	-0.591225	0.0866207	-0.183964	-0.785785	0.0466886	0.236779	4118	0.835933	-0.0209757	-5.96674	0.270125	-0.178944	-2.3724	0.358278	0.157968	Buffering	Buffering	Buffering	Buffering
614	LRP1	0.0137129	0.157081	0.314721	0.997593	0.000191216	0.406629	0.0348827	0.15689	4129	0.0562071	0.128108	0.548377	0.693715	-0.0380057	-2.40402	0.098552	0.166113	Buffering	Buffering	Buffering	Buffering
615	LRPAP1	0.00114101	0.283608	0.348758	1.58545e-21	-0.512579	-0.750219	1.45198e-12	0.796186	4134	0.288203	0.182585	1.716	0.000123826	-0.239346	-0.372879	0.0256419	0.421931	Buffering	Buffering	Scaling	Scaling
616	LRRC1	0.000531098	0.253785	0.213845	2.46928e-05	-0.421701	0.339708	2.69175e-09	0.675486	4136	0.367658	-0.0654312	4.89763	6.22471e-05	-0.339157	-0.226913	0.00407354	0.273726	Buffering	Scaling	Scaling	Scaling
617	LRRFIP1	0.194662	0.0769127	-37.6043	2.52396e-06	-0.340477	-0.235609	1.37663e-06	0.417389	4155	0.159542	-0.0893767	-0.830121	0.0964443	-0.116561	-0.528494	0.735887	0.0271844	Buffering	Buffering	Buffering	Scaling
618	LSM14A	1.23791e-06	0.385437	0.23259	1.51726e-12	-0.416888	4.77923	4.99855e-16	0.802325	4167	0.0399154	0.116812	0.219173	0.00171501	-0.196368	-0.278572	3.4091e-05	0.31318	Buffering	Buffering	Scaling	Scaling
619	LSM2	2.00213e-06	0.357831	1.35118	3.90802e-13	-0.733154	-0.329432	1.98617e-20	1.09099	4169	0.412201	0.048183	0.466836	0.172955	-0.13152	-3.20948	0.0833424	0.179703	Buffering	Buffering	Scaling	Scaling
620	LSR	0.135469	0.161478	0.231843	4.85252e-06	-0.410157	0.392798	7.20362e-06	0.571635	4177	0.102555	0.149443	0.902764	0.000209704	-0.289589	-0.182348	9.21625e-05	0.439031	Buffering	Scaling	Buffering	Scaling
621	LSS	9.52329e-06	0.366853	-0.22332	1.047e-07	-0.293838	-0.112343	1.86019e-12	0.66069	4178	0.0264918	0.212235	0.588127	0.0214472	-0.141524	-0.409283	0.000996391	0.353759	Buffering	Buffering	Scaling	Scaling
622	LTA4H	3.82168e-08	0.388158	0.38473	6.32504e-09	-0.476985	-1.16629	2.61585e-17	0.865143	4179	0.0833377	0.112994	0.355444	0.000159301	-0.231244	-0.30497	1.74806e-05	0.344237	Buffering	Buffering	Scaling	Scaling
623	LTBP3	0.000382421	0.277162	0.272093	0.0288353	-0.182752	0.492186	7.82815e-06	0.459914	4182	0.464014	-0.0722944	-3.9132	0.140872	0.151033	0.847573	0.073236	-0.223328	Buffering	Anti-Scaling	Scaling	Buffering
624	LTBP4	0.318739	0.129553	2.3243	0.483708	-0.0668692	8.17444	0.164231	0.196422	4183	0.731216	0.0794883	10.7949	0.743859	-0.0700471	-6.54931	0.585133	0.149535	Buffering	Buffering	Buffering	Buffering
625	LUM	0.37608	-0.208455	-6.68092	0.0984915	0.422757	15.8372	0.0361808	-0.631211	4189	0.655778	0.0762203	-28.9315	0.978768	-0.00539592	-6.88783	0.725455	0.0816162	Buffering	Buffering	Anti-Scaling	Anti-Scaling
626	LY75	0.84049	-0.0370198	0.617316	0.0552823	-0.382913	0.447869	0.171293	0.345894	4193	0.97094	-0.00361443	-10.9611	0.489352	-0.0921513	-1.71026	0.569443	0.0885368	Buffering	Buffering	Buffering	Scaling
627	LYAR	0.0016528	0.299439	-1.14378	7.14558e-18	-0.392836	-0.180472	1.88738e-09	0.692275	4194	0.126747	0.168127	0.412965	3.34468e-05	-0.241889	-0.412896	0.00141673	0.410016	Buffering	Buffering	Scaling	Scaling
628	LYRM4	6.12143e-11	0.587739	0.688713	0.000102208	-0.35855	-1.55325	1.8511e-15	0.946288	4203	0.279253	0.101896	1.05147	0.0529114	-0.183579	-0.378077	0.0127662	0.285475	Buffering	Buffering	Scaling	Scaling
629	LYZ	0.801269	-0.0590664	-2.00623	0.375417	0.220558	-2.66189	0.362254	-0.279624	4209	0.0566645	-0.298144	-1.3354	0.740528	0.0465165	6.00694	0.0516007	-0.34466	Anti-Scaling	Buffering	Buffering	Anti-Scaling
630	MACROD1	0.0268468	0.178757	-1.65498	5.18667e-05	-0.334823	-0.448333	3.12095e-07	0.513579	4219	0.39745	0.102666	-20.6299	0.140724	-0.165995	-0.659114	0.0700982	0.268661	Buffering	Buffering	Buffering	Scaling
631	MAD1L1	7.57339e-07	0.363738	-4.02563	2.40193e-11	-0.46397	-0.244327	1.20435e-18	0.827708	4221	0.00179078	0.151782	0.254279	0.630751	-0.0177485	-0.46773	0.000816817	0.16953	Buffering	Buffering	Scaling	Scaling
632	MAEA	4.83891e-07	0.395973	0.148843	4.00357e-20	-0.503879	-1.6798	3.25645e-18	0.899852	4226	0.112538	-0.124061	-1.64959	0.564671	-0.0311802	1.30676	0.257761	-0.092881	Anti-Scaling	Buffering	Scaling	Scaling
633	MAN2B2	0.259021	0.136131	0.696957	3.77904e-15	-0.43291	-7.93844	2.5466e-05	0.569041	4255	0.973212	0.00532206	2.20019	0.00990555	-0.218608	-1.57862	0.196799	0.22393	Buffering	Buffering	Buffering	Scaling
634	MAP2	0.785411	0.0374961	1.05147	0.274487	-0.17593	1.07912	0.285443	0.213426	4267	0.240208	0.230016	1.95454	0.614911	-0.0843404	-1.93497	0.19471	0.314356	Buffering	Buffering	Buffering	Buffering
635	MAP3K2	0.832267	0.0139153	0.286569	8.80343e-05	-0.391792	0.756988	0.000249513	0.405708	4275	0.637056	0.0443588	1.25519	0.2552	0.116286	0.650096	0.579918	-0.0719277	Buffering	Anti-Scaling	Buffering	Scaling
636	MAP4K2	0.000216066	0.28689	-0.380229	0.898923	-0.0096584	-0.259668	0.00119932	0.296548	4285	0.0602735	0.146333	0.402033	0.0547657	-0.126687	-0.213543	0.000604365	0.273019	Buffering	Buffering	Scaling	Buffering
637	MAPK13	0.00171684	0.312742	1.08135	0.000189626	-0.474527	-2.65378	3.17383e-08	0.787269	4295	0.108543	0.165046	2.34694	0.051952	-0.163444	-0.301734	0.00584849	0.32849	Buffering	Buffering	Scaling	Scaling
638	MAPK14	4.08495e-05	0.21741	-0.951763	4.22786e-12	-0.542127	-0.176809	6.71488e-18	0.759537	4296	0.689414	0.0184401	0.767968	0.0153203	-0.101529	-0.270559	0.0255055	0.11997	Buffering	Buffering	Buffering	Scaling
639	MARK2	0.0185656	0.132077	0.299168	5.01448e-05	-0.239243	0.785626	2.99459e-07	0.371321	4316	0.640548	0.0203926	0.695912	0.0454829	-0.0850155	-0.454633	0.0493175	0.105408	Buffering	Buffering	Buffering	Buffering
640	MARS	0.00509506	0.266443	-0.328034	0.00403311	-0.232653	-0.158472	1.38325e-05	0.499096	4318	0.0174688	0.134343	0.362006	0.160111	-0.0721736	-0.683507	0.00244658	0.206517	Buffering	Buffering	Scaling	Buffering
641	MCAM	0.119176	0.112345	-49.353	0.357309	0.0687483	-5.74832	0.616925	0.0435968	4353	0.260605	0.0842319	0.861547	0.905892	-0.00877762	3.78493	0.310749	0.0930095	Buffering	Buffering	Buffering	Buffering
642	MCM3	2.35989e-05	0.319903	-0.74842	2.87974e-08	-0.47523	-0.161401	1.80485e-15	0.795133	4364	0.105835	0.165492	4.46878	0.261322	0.12053	14.8975	0.7364	0.0449619	Buffering	Anti-Scaling	Scaling	Scaling
643	MCM3AP	8.54235e-05	0.347882	2.82437	5.81356e-11	-0.366103	-0.364628	5.81431e-12	0.713985	4365	0.561477	0.0350967	0.925022	0.826556	-0.00848818	19.7776	0.495629	0.0435849	Buffering	Buffering	Scaling	Scaling
644	MCM6	0.655039	-0.0362125	-0.349339	0.0109752	-0.349877	-0.432611	0.0319881	0.313664	4368	0.762885	0.0363521	-2.03443	0.965846	-0.00574672	-1.40066	0.794588	0.0420988	Buffering	Buffering	Buffering	Scaling
645	MDC1	7.57915e-07	0.369145	-0.561248	5.23041e-05	-0.374522	-0.209217	4.88292e-12	0.743667	4380	0.00365418	0.226314	0.74674	0.266367	-0.0841091	-0.338444	0.000938897	0.310423	Buffering	Buffering	Scaling	Scaling
646	ME3	0.000426051	0.367625	0.3634	0.000520106	-0.374558	0.66712	3.16824e-08	0.742183	4388	0.568129	0.0546302	1.72482	0.0129689	-0.185894	-0.369427	0.0170425	0.240524	Buffering	Buffering	Scaling	Scaling
647	MED10	1.22077e-16	0.461827	-1.28463	0.00149773	-0.25697	-0.183288	1.13919e-12	0.718797	4395	0.999385	-3.66258e-05	3.12679	0.824373	-0.021048	19.9924	0.83432	0.0210114	Buffering	Buffering	Scaling	Scaling
648	MED17	0.000644835	0.193479	0.453195	1.53265e-10	-0.374576	-1.03997	5.97042e-14	0.568055	4402	0.15159	0.0897496	0.637901	0.511205	-0.0363964	-0.801361	0.0701747	0.126146	Buffering	Buffering	Buffering	Scaling
649	MED20	5.88616e-12	0.380733	0.448962	5.48567e-13	-0.489055	-0.289677	1.16131e-24	0.869787	4405	0.521083	0.0359446	0.800309	0.552284	0.0408649	0.711078	0.950248	-0.00492033	Buffering	Buffering	Scaling	Scaling
650	MED29	0.000200244	0.365381	0.393135	5.37874e-05	-0.267727	1.30667	2.27224e-08	0.633108	4414	0.299758	0.116035	-3.34968	0.929402	0.011132	-1.23229	0.45119	0.104903	Buffering	Buffering	Scaling	Scaling
651	MEN1	0.0101526	0.0938548	-0.508076	0.00069582	-0.113032	-0.146865	1.44726e-06	0.206887	4429	0.137692	0.0992461	0.380911	0.977672	0.00306774	2.27564	0.423593	0.0961783	Buffering	Buffering	Buffering	Buffering
652	METAP2	0.000115633	0.207813	-0.48028	1.33699e-16	-0.671285	-0.212603	9.41942e-22	0.879098	4437	0.12017	0.0696685	0.259008	4.93122e-06	-0.254737	-0.168762	4.34321e-07	0.324406	Buffering	Scaling	Buffering	Scaling
653	METTL1	0.000324528	0.223379	0.310844	0.000319384	-0.233397	1.13965	2.1632e-08	0.456776	4439	0.967174	-0.00398068	-3.94271	0.0252681	-0.185039	-0.374527	0.0874901	0.181058	Buffering	Buffering	Buffering	Buffering
654	METTL7A	0.195347	0.128355	-7.45635	5.53155e-07	-0.551744	-0.756354	3.3287e-07	0.680099	4450	0.078813	0.163153	0.730769	0.0264989	-0.244441	-0.838126	0.00158041	0.407593	Buffering	Buffering	Buffering	Scaling
655	METTL7B	0.609274	-0.0562641	0.512617	1.3201e-05	-0.461775	0.605597	0.00119124	0.405511	4451	0.440201	-0.11072	-2.51072	0.000953264	-0.457248	-0.480519	0.0375699	0.346528	Anti-Scaling	Scaling	Buffering	Scaling
656	MMAB	0.0755887	0.108655	-0.30091	3.09942e-12	-0.440782	-0.130404	5.64935e-12	0.549438	4534	0.286089	0.113702	1.24432	0.00315759	-0.236181	-0.244637	0.00144643	0.349883	Buffering	Buffering	Buffering	Scaling
657	MMP7	0.480195	-0.144148	0.314422	1.39689e-05	-1.02358	0.435197	0.000999213	0.879432	4542	0.429778	0.157064	-3.54012	0.355109	-0.178934	-0.824425	0.168684	0.335998	Buffering	Buffering	Anti-Scaling	Scaling
658	MON2	1.40039e-06	0.264892	-0.675676	4.87137e-14	-0.505661	-0.179155	1.47976e-21	0.770553	4562	0.179093	0.0707606	0.40883	2.69428e-05	-0.20091	-0.199162	5.91748e-05	0.271671	Buffering	Buffering	Scaling	Scaling
659	MORC3	0.0215453	0.165597	3.0637	1.75261e-13	-0.407285	-0.421579	4.84449e-11	0.572882	4564	0.812739	0.0149272	0.833644	0.307431	-0.0676044	-4.11893	0.318263	0.0825316	Buffering	Buffering	Buffering	Scaling
660	MPDZ	0.00394423	0.322053	-8.80104	0.0106262	-0.19353	-0.818832	8.36215e-06	0.515583	4573	0.915423	-0.0133342	-2.50018	0.68954	0.0406214	-5.50643	0.690559	-0.0539556	Buffering	Buffering	Scaling	Buffering
661	MPP6	0.00948107	0.293279	-0.516717	0.00118041	-0.310587	-0.21757	3.29063e-06	0.603866	4583	0.853471	-0.0157654	0.900577	0.00216079	-0.262936	-0.744529	0.0125771	0.247171	Buffering	Scaling	Scaling	Scaling
662	MRPL11	0.151009	0.117517	2.0504	2.62417e-05	-0.314195	-1.10993	9.87446e-06	0.431712	4608	0.598525	0.0376877	1.52525	0.030732	-0.169279	-0.608432	0.0286926	0.206967	Buffering	Buffering	Buffering	Scaling
663	MRPL14	2.44805e-09	0.366494	0.512031	1.18714e-11	-0.556086	-0.433337	8.38316e-21	0.92258	4611	0.116433	0.113601	0.742098	0.599149	-0.0460172	-0.903092	0.0819678	0.159618	Buffering	Buffering	Scaling	Scaling
664	MRPL16	0.54651	0.0356834	-0.579333	3.50408e-08	-0.3423	-0.246634	5.48094e-07	0.377983	4613	0.464404	-0.0510192	-1.15385	0.117832	-0.185116	-1.24338	0.292046	0.134097	Buffering	Buffering	Buffering	Scaling
665	MRPL2	1.32567e-06	0.324873	0.62375	5.00148e-06	-0.412068	-1.17868	4.38916e-12	0.736941	4617	0.0945943	0.106695	0.520983	0.304164	-0.064001	-0.0992936	0.000948809	0.170696	Buffering	Buffering	Scaling	Scaling
666	MRPL21	2.65689e-05	0.300071	0.475533	1.11461e-07	-0.404196	-3.48314	6.72166e-13	0.704267	4619	0.841893	-0.0136407	18.3719	0.0240919	-0.15811	-0.466638	0.0846391	0.144469	Buffering	Buffering	Scaling	Scaling
667	MRPL30	0.201504	0.0939938	-0.715134	0.161307	-0.152772	-0.539759	0.0495695	0.246765	4626	0.0183673	-0.295494	-0.474019	0.482868	-0.0874953	-3.90677	0.192647	-0.207999	Anti-Scaling	Buffering	Buffering	Buffering
668	MRPL32	0.0319738	0.124885	5.94478	1.41872e-11	-0.474794	-0.424138	5.18191e-13	0.599679	4627	0.372974	0.0822274	2.00221	0.6988	-0.0344983	-1.96181	0.267749	0.116726	Buffering	Buffering	Buffering	Scaling
669	MRPL39	0.00315283	0.214999	-0.651353	4.73981e-18	-0.552957	-0.26578	6.5058e-16	0.767956	4633	0.803123	0.0170513	2.74217	0.0110468	-0.16072	-0.584506	0.0299956	0.177771	Buffering	Buffering	Buffering	Scaling
670	MRPL42	0.000633349	0.230534	-1.35473	6.43038e-06	-0.33728	-0.362032	6.68924e-10	0.567814	4637	0.244159	0.115095	2.34995	0.404952	0.0668501	3.51158	0.670918	0.0482451	Buffering	Buffering	Buffering	Scaling
671	MRPL44	0.958258	-0.00373971	-2.14109	0.0303298	-0.248437	-0.958332	0.0542579	0.244697	4639	0.0324616	-0.176575	-0.30762	0.248148	0.0795892	0.777614	0.0106788	-0.256164	Anti-Scaling	Buffering	Buffering	Buffering
672	MRPL48	1.10053e-07	0.367539	0.428186	0.00394618	-0.229121	-97.5344	1.2442e-09	0.59666	4643	0.581077	-0.036138	-3.66546	0.0470092	-0.162237	-0.66472	0.158108	0.126099	Buffering	Buffering	Scaling	Buffering
673	MRPL49	0.00651426	0.189252	-10.7004	1.68535e-05	-0.29826	-0.451167	2.12215e-08	0.487512	4644	0.533847	0.0442758	1.17532	0.00962867	-0.191109	-0.424302	0.00746811	0.235385	Buffering	Buffering	Buffering	Scaling
674	MRPS10	3.63512e-11	0.349163	-0.460979	3.62986e-11	-0.543506	-0.156185	2.16539e-20	0.892669	4654	0.260583	0.101955	1.06783	0.729437	-0.027689	2.85161	0.206309	0.129644	Buffering	Buffering	Scaling	Scaling
675	MRPS12	3.33749e-05	0.511225	0.451025	6.39193e-14	-0.703751	-5.28491	6.91285e-15	1.21498	4656	0.470189	-0.0508595	-2.29789	0.566116	-0.0546301	-3.9747	0.970647	0.00377059	Buffering	Buffering	Scaling	Scaling
676	MRPS17	0.00370563	0.173709	25.429	7.2387e-10	-0.481195	-0.486957	5.76342e-13	0.654904	4660	0.494228	-0.0554077	-1.25218	0.431339	0.0466136	5.42682	0.246516	-0.102021	Buffering	Buffering	Buffering	Scaling
677	MRPS18A	2.12527e-08	0.307203	0.30117	5.42756e-09	-0.433214	-1.43983	3.00185e-17	0.740417	4661	0.0371035	0.158636	1.42972	0.30589	-0.0883524	-0.346217	0.0069787	0.246988	Buffering	Buffering	Scaling	Scaling
678	MRPS18B	2.71146e-07	0.301338	1.14552	4.64023e-08	-0.454392	-0.405396	9.94445e-15	0.75573	4662	0.85128	0.011468	-1.13043	0.755375	0.0236683	-1.38359	0.87859	-0.0122003	Buffering	Buffering	Scaling	Scaling
679	MRPS24	0.000207109	0.16739	-0.560295	2.95782e-21	-0.54531	-0.14096	1.59786e-25	0.7127	4668	0.0910133	-0.121714	-0.731588	0.968983	0.00243599	0.440803	0.11792	-0.12415	Anti-Scaling	Buffering	Buffering	Scaling
680	MRPS30	1.4689e-07	0.27163	-0.436712	1.75524e-06	-0.43262	-0.147395	8.60416e-12	0.70425	4673	0.0631853	0.0872361	1.10275	0.811021	-0.0163813	-0.933866	0.159415	0.103617	Buffering	Buffering	Scaling	Scaling
681	MRPS5	0.222366	0.0669397	-0.436853	0.169606	-0.140716	-0.564525	0.0629944	0.207656	4679	0.0839905	-0.152526	-0.512008	0.672581	0.0286463	1.60694	0.0822555	-0.181172	Anti-Scaling	Buffering	Buffering	Buffering
682	MRPS6	3.11726e-05	0.471082	0.635228	3.56043e-07	-0.356885	-6.14606	1.87958e-10	0.827967	4680	0.332576	0.100082	1.55055	0.718208	-0.0237629	-1.38252	0.22975	0.123844	Buffering	Buffering	Scaling	Scaling
683	MRPS9	0.00351646	0.238605	0.757284	0.00186256	-0.381106	-1.6046	1.87958e-05	0.619711	4682	0.00813783	-0.177584	-0.235483	0.922795	-0.00545391	1.84348	0.0260449	-0.17213	Anti-Scaling	Buffering	Buffering	Scaling
684	MSI1	0.916552	0.00557003	2.35724	0.558419	0.0254299	1.0226	0.742774	-0.0198599	4690	0.0783466	0.31484	3.2144	0.00174581	-0.450504	-0.523173	0.000493786	0.765344	Scaling	Scaling	Buffering	Buffering
685	MSRB3	0.476692	-0.0838174	-3.12733	0.663077	-0.0561703	-4.21708	0.857561	-0.0276471	4701	0.0332409	-0.321013	-0.618549	0.47759	-0.0978343	13.815	0.178127	-0.223178	Anti-Scaling	Buffering	Buffering	Buffering
686	MTA2	0.269747	0.0901193	0.820376	0.00381082	-0.253665	3.0574	0.00129435	0.343784	4712	0.260747	0.0559909	0.768178	0.597199	0.0313639	1.61464	0.729822	0.024627	Buffering	Buffering	Buffering	Scaling
687	MTAP	6.7098e-07	0.330654	0.51954	4.27295e-33	-0.679553	-0.482689	9.3509e-30	1.01021	4714	0.000440133	0.26115	0.287513	1.21084e-10	-0.364886	-0.250148	1.23882e-11	0.626036	Scaling	Scaling	Scaling	Scaling
688	MTCH1	3.7819e-06	0.27647	-141.91	5.50429e-06	-0.326441	-0.278634	1.74704e-12	0.60291	4715	0.969449	0.0029726	1.59543	0.00437612	-0.201732	-0.378846	0.0249298	0.204705	Buffering	Buffering	Scaling	Scaling
689	MTMR12	1.91574e-21	0.487985	0.375919	8.8822e-05	-0.364802	-1.90618	2.47027e-13	0.852787	4740	1.3846e-07	0.293256	0.525559	2.64189e-05	-0.257123	-0.0460582	2.14483e-11	0.550379	Scaling	Scaling	Scaling	Scaling
690	MTMR2	2.47882e-06	0.271733	4.38726	3.34975e-06	-0.269663	-0.344825	1.17008e-12	0.541396	4742	0.408161	0.0635047	37.7396	0.114718	0.127624	1.18724	0.498782	-0.0641193	Buffering	Anti-Scaling	Scaling	Scaling
691	MTX2	0.00534331	0.23669	0.511038	0.00732521	-0.348874	9.1521	0.000125664	0.585564	4759	0.254633	0.086535	0.668131	0.178355	-0.100873	-0.529774	0.0653155	0.187408	Buffering	Buffering	Buffering	Scaling
692	MUT	0.000308731	0.25398	1.40222	1.22278e-09	-0.490046	-0.433247	9.42177e-14	0.744026	4768	0.00374469	0.154353	0.271525	0.125604	-0.12986	-0.598139	0.00231443	0.284212	Buffering	Buffering	Scaling	Scaling
693	MVK	0.663429	0.0240256	-0.305896	0.000271657	-0.229383	-0.252217	0.000541338	0.253409	4772	0.103594	-0.150308	-1.84945	0.00128006	-0.271199	-0.481776	0.255271	0.120892	Anti-Scaling	Scaling	Buffering	Buffering
694	MX1	0.206581	0.156504	0.152041	2.77343e-05	-0.498984	0.365876	2.41205e-05	0.655489	4774	0.473807	0.168432	-28.3103	0.0581174	-0.306241	-1.07239	0.0614881	0.474674	Buffering	Scaling	Buffering	Scaling
695	MX2	0.00755409	0.399477	0.97218	0.00888198	-0.283523	4.55202	2.88921e-05	0.683	4775	0.253559	0.181116	2.50896	0.0344827	-0.234562	-0.856759	0.0182817	0.415678	Buffering	Buffering	Scaling	Scaling
696	MYADM	0.382979	0.0725534	0.401428	1.66621e-05	-0.291915	1.07824	0.000144024	0.364468	4779	0.0414519	0.28209	0.739523	0.35603	-0.12633	-1.79039	0.0151381	0.40842	Scaling	Buffering	Buffering	Scaling
697	MYH14	0.116107	0.164947	-1.78524	0.327433	0.0816566	-1.44166	0.474887	0.0832906	4790	0.339581	0.0928766	0.80203	0.000152285	-0.373988	-0.299738	0.000155404	0.466865	Buffering	Scaling	Buffering	Buffering
698	MYL6	0.00128954	0.245203	0.216826	0.00111617	-0.285751	0.441144	9.90881e-07	0.530953	4799	0.0951711	-0.152032	-1.11011	0.742076	0.0256695	1.88658	0.086382	-0.177701	Anti-Scaling	Buffering	Buffering	Scaling
699	MYL6B	0.000588889	0.275499	0.324739	1.6776e-05	-0.380669	1.0124	2.32409e-09	0.656168	4800	0.167144	-0.10499	-1.17596	0.96582	-0.00288545	4.2465	0.241594	-0.102105	Anti-Scaling	Buffering	Scaling	Scaling
700	MYO1B	0.12254	0.19571	-0.971146	0.22568	0.18012	-0.747129	0.931944	0.0155893	4806	0.951493	0.0051498	-1.06585	0.0307259	0.319058	0.699149	0.0460456	-0.313908	Buffering	Anti-Scaling	Buffering	Anti-Scaling
701	MYO1G	0.377255	0.0702891	-0.199176	0.24666	-0.0834137	-0.132884	0.0963509	0.153703	4811	0.647898	-0.0567842	24.6882	0.70705	0.028498	0.740405	0.497576	-0.0852822	Buffering	Buffering	Buffering	Buffering
702	N6AMT1	0.0301664	0.179929	1.09912	4.85043e-10	-0.455171	-1.02338	5.44014e-10	0.6351	4825	0.404434	0.0791395	0.686218	0.00483132	-0.288695	-0.476697	0.00317857	0.367834	Buffering	Scaling	Buffering	Scaling
703	NAB2	5.12954e-07	0.343266	0.309314	3.69356e-09	-0.391237	10.1687	2.12793e-16	0.734504	4839	0.00560146	0.285576	0.511691	0.000125489	-0.438479	-0.409381	7.7908e-07	0.724056	Scaling	Scaling	Scaling	Scaling
704	NACA	1.98594e-06	0.277865	0.449594	6.0503e-09	-0.433013	-0.747488	1.99937e-15	0.710877	4841	0.396106	-0.0308333	0.394359	0.564823	-0.0260354	0.651417	0.914517	-0.00479787	Buffering	Buffering	Scaling	Scaling
705	NADSYN1	0.000622133	0.296049	1.11523	2.61384e-08	-0.522101	-0.955087	2.36529e-12	0.81815	4845	0.0899398	0.137585	1.05197	0.0217177	-0.176849	-0.327125	0.00157105	0.314433	Buffering	Buffering	Scaling	Scaling
706	NAP1L1	2.13086e-09	0.49101	1.38268	1.06837e-11	-0.560586	-0.324194	6.17692e-22	1.0516	4855	0.000181615	0.2776	0.301598	0.0087936	-0.193582	-0.357122	1.06719e-06	0.471182	Scaling	Buffering	Scaling	Scaling
707	NAPA	0.226673	0.143258	3.69126	2.35545e-07	-0.442802	-0.991798	2.04346e-05	0.58606	4857	0.00761216	0.158002	0.160577	0.0592417	-0.115351	-224.45	0.000657605	0.273353	Buffering	Buffering	Buffering	Scaling
708	NAPG	1.79803e-05	0.442176	0.763644	2.65896e-14	-0.471433	-1.45906	5.52284e-15	0.913608	4860	0.00394249	0.17032	0.15564	9.57966e-10	-0.237367	-0.20663	2.63918e-08	0.407687	Buffering	Buffering	Scaling	Scaling
709	NARS2	1.57096e-08	0.439987	0.993808	0.434046	-0.0928651	-4.49435	9.02582e-05	0.532852	4865	0.0232648	0.175827	1.11323	0.00321619	-0.234561	-0.246799	4.22089e-05	0.410388	Buffering	Buffering	Scaling	Buffering
710	NCAM1	0.326979	0.0389287	29.2136	0.384529	0.0283441	-7.28871	0.813357	0.0105846	4880	0.142858	-0.328485	-2.21168	0.178898	-0.319166	-2.15098	0.974459	-0.00931877	Anti-Scaling	Scaling	Buffering	Buffering
711	NCAPD3	0.000149766	0.298459	-0.447254	0.00204441	-0.172399	-0.110785	7.29083e-08	0.470859	4883	0.0879164	0.21981	0.67148	0.861107	-0.0228608	-4.39098	0.140888	0.242671	Buffering	Buffering	Scaling	Buffering
712	NCAPH	0.74112	-0.0348817	-0.412774	0.598781	-0.0811583	-0.514279	0.792954	0.0462766	4886	0.337463	-0.0905222	-0.661426	0.668189	0.0445158	4.03292	0.276381	-0.135038	Buffering	Buffering	Buffering	Buffering
713	NCK2	0.0604886	0.113489	0.758278	0.0828431	-0.133283	-5.83046	0.00840464	0.246772	4897	0.0483664	0.112655	0.205965	0.73925	-0.0248536	7.21104	0.119648	0.137508	Buffering	Buffering	Buffering	Buffering
714	NCKAP1	0.00205033	0.274701	0.35546	0.00557379	-0.31874	0.853344	2.5402e-05	0.59344	4898	0.296083	0.0642559	0.339544	0.105772	-0.145701	-0.821156	0.0469061	0.209957	Buffering	Buffering	Scaling	Scaling
715	NCKAP1L	0.13172	-0.197706	-0.750236	0.0437647	0.240337	-0.827111	0.00620623	-0.438043	4899	0.0335306	-0.2481	-1.06165	0.312791	0.108736	1.39658	0.012406	-0.356836	Anti-Scaling	Anti-Scaling	Anti-Scaling	Anti-Scaling
716	NCL	0.00197501	0.239687	0.944583	0.00802135	-0.357492	-1.3426	9.55565e-05	0.597179	4901	0.794646	0.0269776	1.89283	2.2805e-06	-0.388434	-0.0757587	0.00134959	0.415412	Buffering	Scaling	Buffering	Scaling
717	NCOR2	0.000221546	0.256633	-43.27	4.64033e-05	-0.27557	-0.366662	3.45968e-10	0.532203	4911	0.519532	0.0395013	0.515787	0.0109496	-0.153885	-0.678533	0.0104586	0.193386	Buffering	Buffering	Scaling	Scaling
718	NDC80	5.33966e-06	0.481351	-1.2007	2.01021e-08	-0.428015	-0.39398	6.48784e-15	0.909366	4919	0.828193	0.0212129	1.66575	0.710233	-0.0309897	-26.5642	0.618503	0.0522027	Buffering	Buffering	Scaling	Scaling
719	NDUFA10	0.344844	0.0791366	-5.89661	0.013264	-0.262316	-0.673493	0.00584189	0.341453	4927	0.141447	-0.115579	-1.66745	0.905038	0.00934916	0.597796	0.211686	-0.124928	Anti-Scaling	Buffering	Buffering	Scaling
720	NDUFA12	0.244085	0.062534	0.357556	2.77474e-12	-0.439998	-2.49458	1.44714e-11	0.502532	4929	0.0839047	-0.126573	-1.02611	0.732016	-0.0276859	15.2595	0.307789	-0.0988875	Anti-Scaling	Buffering	Buffering	Scaling
721	NDUFA3	0.135417	0.135433	0.28222	1.59871e-06	-0.356279	0.593674	3.88417e-06	0.491712	4932	0.824041	-0.0181186	1.22226	0.112947	-0.193384	-1.36823	0.178047	0.175266	Buffering	Buffering	Buffering	Scaling
722	NDUFA4	0.00236025	0.221074	0.545161	2.19305e-07	-0.49873	-3.43014	1.47824e-10	0.719805	4933	0.595284	0.0468405	7.23532	0.314427	-0.0876171	-0.954282	0.178431	0.134458	Buffering	Buffering	Buffering	Scaling
723	NDUFA4L2	0.836584	0.033413	29.0638	0.00262331	-0.361744	-1.41238	0.0171791	0.395157	4934	0.0776195	0.391601	3.78938	0.919739	-0.0255746	-3.48099	0.176724	0.417175	Scaling	Buffering	Buffering	Scaling
724	NDUFB6	2.93261e-06	0.315935	0.383041	2.24282e-27	-0.646103	-0.623219	1.8223e-29	0.962038	4956	0.779145	0.0174428	2.71037	0.170092	-0.0952426	-1.33156	0.0838279	0.112685	Buffering	Buffering	Scaling	Scaling
725	NDUFC2	2.2252e-05	0.257723	0.137896	0.469833	-0.100356	1.20625	0.014859	0.358079	4961	0.406479	0.0580292	0.621148	0.0255559	-0.178857	-0.665706	0.00979106	0.236886	Buffering	Buffering	Scaling	Buffering
726	NDUFS1	0.378661	0.0567602	-0.378054	0.00411938	-0.315013	-0.340317	0.00215177	0.371773	4962	0.0243188	-0.145633	-0.407898	0.476016	-0.0627158	-20.5244	0.396986	-0.0829175	Anti-Scaling	Buffering	Buffering	Scaling
727	NDUFS6	6.28952e-29	0.554006	0.818259	2.41613e-07	-0.446053	-0.253833	1.4944e-18	1.00006	4967	0.858793	-0.0110324	2.55126	0.0954151	-0.153379	-0.633251	0.126166	0.142346	Buffering	Buffering	Scaling	Scaling
728	NDUFS8	5.11481e-06	0.315507	0.582741	0.00281671	-0.220136	-2.74964	4.17151e-09	0.535642	4969	0.802986	0.0146458	0.784965	0.0012285	-0.182189	-0.314887	0.00504731	0.196835	Buffering	Buffering	Scaling	Buffering
729	NDUFV1	2.63388e-05	0.283883	98.9152	4.39394e-07	-0.321788	-0.298157	2.485e-13	0.605671	4970	0.392131	-0.0479391	1.05929	0.00122833	-0.239271	-0.475105	0.0137408	0.191332	Buffering	Buffering	Scaling	Scaling
730	NDUFV2	9.20722e-10	0.336617	-1.45917	1.19009e-44	-0.579466	-0.131462	5.35853e-35	0.916083	4971	0.0680259	-0.114736	-1.1839	0.878596	0.00770493	1.01004	0.0686312	-0.122441	Anti-Scaling	Buffering	Scaling	Scaling
731	NDUFV3	0.00907835	0.205867	0.918564	1.20806e-09	-0.336286	-0.785582	3.24087e-09	0.542154	4972	0.634086	-0.0426718	2.20552	0.121754	-0.0967992	-3.99384	0.555464	0.0541274	Buffering	Buffering	Buffering	Scaling
732	NEDD1	0.00719821	0.203518	-0.941781	8.53092e-07	-0.40408	-0.330805	9.68928e-10	0.607598	4981	0.219601	0.0791405	0.317586	0.00134796	-0.244974	-0.728314	0.000341781	0.324115	Buffering	Buffering	Buffering	Scaling
733	NEU1	0.000292959	0.303965	0.896925	0.00351279	-0.298507	-2.18128	8.18955e-08	0.602473	5002	0.613432	0.0514398	8.95727	0.514936	-0.0894762	-1.34887	0.327616	0.140916	Buffering	Buffering	Scaling	Scaling
734	NFIB	4.57788e-08	0.58601	0.182571	2.13817e-13	-0.553552	0.249621	7.77792e-21	1.13956	5015	0.00649939	0.220732	0.407221	0.0833514	-0.106992	-1.03394	6.43654e-05	0.327724	Buffering	Buffering	Scaling	Scaling
735	NFKBIE	0.0282679	0.215096	0.531284	0.00180288	-0.351952	0.658251	9.94167e-06	0.567049	5022	0.192884	0.0914049	1.19335	0.423569	-0.0677375	-1.00261	0.0964037	0.159142	Buffering	Buffering	Buffering	Scaling
736	NFRKB	0.0133999	0.223002	-2.2705	0.000432848	-0.239786	-0.317286	5.58675e-06	0.462788	5023	0.75179	0.0179854	1.159	0.0159552	-0.167999	-0.314113	0.0152001	0.185984	Buffering	Buffering	Buffering	Buffering
737	NFX1	8.08019e-07	0.271828	0.534206	6.76372e-26	-0.397773	-0.293971	4.51764e-23	0.6696	5026	0.0818401	0.105223	0.357686	0.000162613	-0.227848	-0.359764	1.2135e-06	0.333071	Buffering	Buffering	Scaling	Scaling
738	NFXL1	0.00944474	0.308281	2.36798	1.1834e-10	-0.474094	-0.838391	2.23745e-08	0.782375	5027	0.972172	0.00398839	-174.12	0.0211004	-0.103501	-0.49719	0.360172	0.107489	Buffering	Buffering	Scaling	Scaling
739	NFYA	0.00125992	0.256041	-4.55919	1.91982e-05	-0.368692	-0.328506	1.47541e-09	0.624732	5028	0.862773	0.0159861	1.20582	0.655481	-0.0525051	4.81686	0.597977	0.0684912	Buffering	Buffering	Scaling	Scaling
740	NFYB	0.000109288	0.23926	0.448742	8.56129e-15	-0.499829	-0.48823	3.46005e-19	0.739088	5029	0.253513	0.0661025	0.366102	0.000433014	-0.213777	-0.334429	0.000138995	0.27988	Buffering	Buffering	Buffering	Scaling
741	NHEJ1	0.0192027	0.19447	9.15303	0.122467	-0.156402	-0.831036	0.00481148	0.350871	5036	0.5113	0.0666621	1.18668	0.022263	-0.185961	-0.275293	0.0398121	0.252623	Buffering	Buffering	Buffering	Buffering
742	NIF3L1	0.000108719	0.28968	0.469521	0.00380063	-0.317768	-2.74219	4.23318e-06	0.607449	5043	0.0131184	0.300216	0.541138	0.00872149	-0.264585	-0.227004	0.000269675	0.564801	Scaling	Scaling	Scaling	Scaling
743	NIPBL	2.33485e-15	0.39724	0.607186	0.0105429	-0.196211	-1.24985	2.0871e-10	0.593451	5047	0.00263855	0.110972	0.439303	0.634806	-0.0369817	-1.29355	0.0825317	0.147954	Buffering	Buffering	Scaling	Buffering
744	NLRP2	0.0125784	0.977267	44.2318	0.963115	0.013306	-5.09914	0.0180709	0.963961	5063	0.786573	0.0522998	-15.2823	0.591496	-0.0961034	-1.82737	0.478666	0.148403	Buffering	Buffering	Scaling	Buffering
745	NLRX1	0.000995007	0.26112	0.943785	2.64334e-10	-0.563782	-0.834106	6.81917e-14	0.824902	5064	0.199787	0.120124	1.24169	0.00165944	-0.272257	-0.347465	0.000621449	0.392381	Buffering	Scaling	Scaling	Scaling
746	NMI	0.238213	-0.137943	0.467225	0.0132582	-0.337158	0.383439	0.233095	0.199215	5071	0.395831	-0.0951996	-1.17547	0.88478	0.0119516	58.7782	0.401018	-0.107151	Buffering	Buffering	Anti-Scaling	Scaling
747	NNMT	0.0391878	0.455022	3.05133	0.171849	-0.349799	157.605	0.00579824	0.804821	5078	0.221792	0.254518	-9.86373	0.19586	0.280702	-13.5151	0.920218	-0.0261836	Scaling	Anti-Scaling	Scaling	Scaling
748	NNT	8.32496e-06	0.315477	-0.762045	0.000493815	-0.445191	-0.312334	7.08609e-08	0.760668	5079	6.5197e-05	0.226653	0.622317	0.00300202	-0.254275	-0.137396	4.5813e-06	0.480927	Buffering	Scaling	Scaling	Scaling
749	NOC4L	0.0427643	0.102344	-0.362673	0.000688236	-0.153897	-0.139958	9.1308e-06	0.256241	5084	0.682962	-0.0250815	-2.04724	0.902983	0.00615664	16.8591	0.635252	-0.0312382	Buffering	Buffering	Buffering	Buffering
750	NOL6	1.93701e-05	0.223692	1.96778	5.43466e-09	-0.243581	-0.398063	5.06589e-15	0.467272	5090	0.514268	0.0314559	1.45305	0.532753	-0.0254811	-1.5928	0.249924	0.056937	Buffering	Buffering	Buffering	Buffering
751	NOL7	7.99413e-15	0.297377	1.10072	1.0781e-07	-0.324457	-0.223699	2.51573e-17	0.621834	5091	0.0346548	0.165038	0.76358	0.770742	-0.0332956	-1.59891	0.107016	0.198334	Buffering	Buffering	Scaling	Scaling
752	NOSIP	3.93635e-05	0.292241	0.247238	9.56499e-17	-0.49022	-1.13425	9.14937e-18	0.78246	5109	0.0581379	0.124986	0.165633	0.0117233	-0.201939	-0.66583	0.000158219	0.326926	Buffering	Buffering	Scaling	Scaling
753	NOVA2	0.429023	-0.0650575	0.302883	0.0708167	-0.095319	0.191035	0.725207	0.0302615	5114	0.904343	0.0183988	6.39031	0.0176041	-0.375027	-0.499232	0.0452182	0.393426	Buffering	Scaling	Buffering	Buffering
754	NQO2	0.0459367	0.184962	-0.503635	5.10508e-06	-0.520501	-0.221829	8.35782e-08	0.705463	5132	0.984601	-0.00218209	-4.86983	0.486937	-0.117936	-2.11183	0.510856	0.115754	Buffering	Buffering	Buffering	Scaling
755	NRM	0.000244922	0.316246	-0.918653	0.000101804	-0.367416	-0.228303	3.60094e-10	0.683663	5148	0.0142279	0.158976	0.321259	0.174978	-0.0985158	-0.230921	0.000983081	0.257492	Buffering	Buffering	Scaling	Scaling
756	NRP2	0.231054	-0.151531	29.2316	0.0840321	-0.272783	-6.41189	0.51166	0.121252	5150	0.784368	-0.0342729	-4.35617	0.62079	0.0805463	2.9492	0.549378	-0.114819	Buffering	Buffering	Anti-Scaling	Scaling
757	NSUN2	2.40266e-28	0.46609	-0.536209	0.00587036	-0.203559	-0.163583	1.60503e-12	0.66965	5165	3.73157e-09	0.277356	0.383973	0.000518388	-0.155428	-0.0448867	4.98088e-11	0.432784	Scaling	Buffering	Scaling	Buffering
758	NT5DC3	0.0295669	0.146001	-0.264597	2.40218e-08	-0.347229	-0.114955	1.88627e-09	0.49323	5175	0.228006	0.19374	1.48272	0.409889	-0.0722016	-0.583012	0.0882844	0.265941	Buffering	Buffering	Buffering	Scaling
759	NUCB1	0.628062	0.0314208	0.193187	1.11275e-13	-0.407933	0.489615	5.67484e-09	0.439354	5187	0.0516096	-0.118265	20.2372	0.016411	-0.143219	-2.02146	0.733665	0.0249544	Anti-Scaling	Buffering	Buffering	Scaling
760	NUDCD3	0.00111911	0.166272	0.323818	3.37837e-13	-0.447283	-1.03354	4.11104e-17	0.613555	5193	0.0799716	0.105183	0.428597	2.07582e-06	-0.306338	-0.190483	3.12535e-07	0.411521	Buffering	Scaling	Buffering	Scaling
761	NUDT1	2.61024e-07	0.341834	-0.393381	1.96699e-07	-0.319217	-0.141712	5.30931e-16	0.661051	5194	0.00823141	0.221004	0.474097	0.0273307	-0.137044	-0.492585	0.000219865	0.358049	Buffering	Buffering	Scaling	Scaling
762	NUDT2	0.00206644	0.28867	3.17762	5.76173e-16	-0.627926	-0.533748	3.41936e-18	0.916595	5202	0.023197	0.216794	0.619566	0.0021783	-0.218914	-0.535608	9.96597e-06	0.435707	Buffering	Buffering	Scaling	Scaling
763	NUDT3	0.000422358	0.232406	0.378107	2.84199e-14	-0.626443	-8.47894	4.63517e-19	0.858848	5204	0.962993	0.00300473	1.53059	4.5989e-06	-0.284371	-0.109229	0.000147396	0.287376	Buffering	Scaling	Buffering	Scaling
764	NUDT4	0.0234448	0.263019	3.22218	2.0703e-13	-0.670691	-0.420133	6.61169e-12	0.93371	5205	0.0127136	0.306402	0.873006	1.88657e-06	-0.428361	-0.201051	8.66776e-07	0.734764	Scaling	Scaling	Scaling	Scaling
765	NUMA1	9.01062e-05	0.328972	-1.31084	0.0652925	-0.140787	-0.390499	2.97087e-06	0.46976	5213	0.0586165	0.137806	0.862362	0.42162	-0.0670419	-1.13195	0.0410558	0.204848	Buffering	Buffering	Scaling	Buffering
766	NUMBL	0.0067952	0.220225	1.26789	0.0855559	-0.104379	-1.70547	0.000422965	0.324604	5215	0.598413	-0.0240032	0.326927	0.064206	-0.100872	-1.33437	0.176532	0.0768686	Buffering	Buffering	Buffering	Buffering
767	NUP107	3.33641e-07	0.418143	-0.802805	3.47297e-11	-0.564314	-0.214013	4.11383e-19	0.982457	5216	0.0591136	0.0739161	0.202705	0.432525	-0.0307993	1.29934	0.0279565	0.104715	Buffering	Buffering	Scaling	Scaling
768	NUP153	2.70769e-13	0.511348	-1.32007	1.53762e-08	-0.468506	-0.169232	3.07934e-21	0.979854	5218	0.00038137	0.219944	0.695817	0.038633	-0.106147	-0.133014	2.13455e-05	0.32609	Buffering	Buffering	Scaling	Scaling
769	NUP155	4.20951e-18	0.507534	-0.379364	0.0675665	-0.179256	-0.180837	5.97417e-09	0.68679	5219	0.019851	0.0607988	0.220054	0.499313	-0.0344313	-2.31926	0.0795025	0.0952301	Buffering	Buffering	Scaling	Buffering
770	NUP35	0.000276809	0.309437	1.94875	0.000213301	-0.475775	-0.589363	2.7407e-07	0.785212	5225	0.0588528	0.148962	0.435119	0.315173	-0.054728	-0.41873	0.0249696	0.20369	Buffering	Buffering	Scaling	Scaling
771	NUP37	0.000198367	0.243654	-0.372583	3.82619e-08	-0.420315	-0.213974	3.60898e-13	0.66397	5226	0.842278	0.0107539	0.94865	0.0646729	-0.0772369	-1.15767	0.163623	0.0879908	Buffering	Buffering	Buffering	Scaling
772	NUP62	0.00523794	0.199714	1.47427	4.3423e-16	-0.42085	-0.25691	1.49707e-12	0.620564	5231	0.165509	0.0564743	0.218069	0.654717	0.0193194	0.457935	0.453733	0.0371549	Buffering	Buffering	Buffering	Scaling
773	NUPL2	8.39402e-06	0.320192	1.32166	1.00741e-09	-0.452151	-0.514719	1.80296e-15	0.772343	5236	0.034304	0.135103	0.494969	0.64616	0.0214382	-10.6018	0.103355	0.113665	Buffering	Buffering	Scaling	Scaling
774	NXF1	0.654899	0.0230005	-0.465359	0.68228	-0.0173121	-0.218955	0.473157	0.0403126	5240	0.238693	0.0662276	0.667058	0.610205	0.0204685	0.473996	0.45172	0.045759	Buffering	Buffering	Buffering	Buffering
775	OAS1	0.239945	-0.214774	1.49109	0.05406	-0.308447	1.07092	0.662464	0.0936737	5248	0.0507095	-0.337597	-0.848124	0.20979	-0.224062	-1.12372	0.57814	-0.113535	Anti-Scaling	Buffering	Anti-Scaling	Scaling
776	OAS2	0.719499	0.0543487	0.682437	0.421069	-0.104151	0.466452	0.364946	0.1585	5249	0.301033	-0.18376	-2.01145	0.986517	-0.00284853	-4.05316	0.407793	-0.180912	Anti-Scaling	Buffering	Buffering	Buffering
777	OAS3	0.316823	-0.174601	1.54493	0.0429851	-0.293773	0.998289	0.550081	0.119171	5250	0.405312	-0.127481	-2.61334	0.34435	-0.122291	-1.5291	0.976625	-0.00519078	Anti-Scaling	Buffering	Anti-Scaling	Scaling
778	OASL	0.3281	-0.217489	1.24487	0.867993	0.0309647	0.680565	0.335951	-0.248454	5251	0.320219	-0.0883412	-1.3622	0.752487	-0.0382653	-4.41356	0.712094	-0.0500759	Buffering	Buffering	Anti-Scaling	Buffering
779	OBSL1	4.67542e-05	0.50307	3.42449	0.00510917	-0.497422	-0.925981	2.81364e-06	1.00049	5254	0.0579579	0.283809	0.817277	0.00734439	-0.230507	-0.181731	0.0028252	0.514316	Scaling	Buffering	Scaling	Scaling
780	OCIAD1	0.000118787	0.336273	0.269382	8.91044e-27	-0.632258	-0.993796	7.06963e-16	0.968532	5255	0.0168413	0.179305	0.137846	6.64576e-13	-0.379936	-0.24645	2.74435e-07	0.559241	Buffering	Scaling	Scaling	Scaling
781	OCIAD2	0.0554317	0.21347	0.141449	9.91095e-28	-0.747865	0.383808	6.30971e-11	0.961335	5256	0.736487	0.0480907	1.56972	6.24773e-09	-0.710374	-0.470913	2.73992e-05	0.758465	Buffering	Scaling	Buffering	Scaling
782	OGDH	0.0011125	0.163777	-0.301122	0.00495742	-0.159392	-0.233899	2.28672e-06	0.323169	5261	0.999639	-2.76546e-05	6.12549	0.99449	0.00044996	7.22927	0.995151	-0.000477614	Buffering	Buffering	Buffering	Buffering
783	OLA1	0.000753271	0.294695	-2.18968	0.000286598	-0.358314	-0.264299	2.51761e-07	0.653009	5269	0.0257122	0.135551	0.294639	0.0867159	-0.192324	-0.492768	0.0098785	0.327874	Buffering	Buffering	Scaling	Scaling
784	OPA3	0.428394	0.0452614	0.215193	0.0025713	-0.166818	0.660082	0.00214505	0.212079	5277	0.0345048	0.289032	0.41884	0.0451094	-0.194261	9.02641	0.00133153	0.483293	Scaling	Buffering	Buffering	Buffering
785	ORMDL1	0.000205585	0.305469	1.02504	0.00398292	-0.329033	-0.866916	4.37264e-06	0.634502	5288	0.00727778	0.267028	0.294769	0.0640564	-0.149193	-0.287948	0.000727703	0.416221	Scaling	Buffering	Scaling	Scaling
786	OS9	0.0139225	0.166025	-1.20661	3.15901e-05	-0.303889	-0.382925	1.45826e-07	0.469915	5289	0.0583862	0.129564	0.513838	0.579931	-0.0438484	-5.14819	0.0637495	0.173413	Buffering	Buffering	Buffering	Scaling
787	OSBP	0.157467	0.0692715	0.425199	3.22574e-06	-0.27603	-9.71274	6.31709e-07	0.345302	5290	0.232986	0.0538708	0.489964	0.439519	-0.0379045	-3.84905	0.138237	0.0917752	Buffering	Buffering	Buffering	Scaling
788	OSBPL3	0.0107324	0.28015	2.59361	3.35147e-08	-0.661341	-0.93323	1.32134e-11	0.941492	5296	0.935078	0.00838473	-9.24033	0.00205352	-0.30329	-0.396488	0.0115305	0.311675	Buffering	Scaling	Scaling	Scaling
789	OSBPL8	0.00384016	0.194191	-0.320492	9.81859e-06	-0.343814	-0.231369	3.37267e-09	0.538005	5299	0.0695641	0.087867	0.211132	0.000882435	-0.258882	-0.542659	6.3578e-05	0.346749	Buffering	Scaling	Buffering	Scaling
790	OTUB1	0.0886636	0.138749	1.96121	0.0133733	-0.193636	-2.54404	0.00100068	0.332385	5307	0.326325	0.0583676	0.539511	5.56066e-05	-0.23379	-0.246555	0.000157124	0.292157	Buffering	Buffering	Buffering	Buffering
791	OXCT1	5.0566e-05	0.411988	-1.75011	0.00123447	-0.573567	-0.532347	6.07337e-07	0.985555	5316	0.00121814	0.323921	2.89219	0.0256459	-0.324063	-0.298315	0.000219797	0.647984	Scaling	Scaling	Scaling	Scaling
792	P2RX4	0.0780267	0.16918	1.78796	9.29162e-05	-0.322113	-1.62477	1.81765e-05	0.491294	5322	0.872911	0.0170287	-4.00875	0.272014	-0.0760274	-0.331129	0.392083	0.0930562	Buffering	Buffering	Buffering	Scaling
793	PA2G4	0.00172372	0.171901	-0.313767	2.61734e-08	-0.443194	-0.275357	1.24219e-11	0.615096	5332	0.0624434	0.0955142	0.452242	0.0528037	-0.136223	-0.608406	0.00410778	0.231737	Buffering	Buffering	Buffering	Scaling
794	PAAF1	0.00473558	0.213461	-0.61162	0.00146991	-0.286791	-0.442466	4.60492e-06	0.500252	5333	0.128426	0.132804	1.46354	0.383351	0.0660312	5.1276	0.521143	0.0667724	Buffering	Buffering	Buffering	Scaling
795	PACS1	0.00150516	0.163074	0.394435	0.000103447	-0.231036	-2.16883	5.35753e-09	0.39411	5338	0.824865	0.0117843	0.758095	0.337955	-0.0625645	2482.17	0.343243	0.0743488	Buffering	Buffering	Buffering	Buffering
796	PAF1	2.26675e-05	0.449054	0.690793	3.31592e-06	-0.315118	-1.21939	3.68766e-10	0.764172	5346	0.0287194	0.112454	0.286333	0.0934026	0.0877152	0.43646	0.687349	0.0247385	Buffering	Buffering	Scaling	Scaling
797	PAFAH1B2	1.65349e-08	0.443469	0.406825	2.54759e-10	-0.514471	-1.46022	7.02597e-20	0.957939	5348	0.00203506	0.167832	0.231937	0.0140109	-0.190463	-0.664783	0.000118169	0.358295	Buffering	Buffering	Scaling	Scaling
798	PAFAH1B3	0.000729768	0.369001	0.764983	1.47043e-05	-0.350177	-1.96149	1.38791e-08	0.719179	5349	0.022328	0.289648	0.963588	0.633043	-0.0633809	-1.87745	0.0354348	0.353029	Scaling	Buffering	Scaling	Scaling
799	PAIP1	8.11172e-12	0.355034	0.648269	0.257484	-0.0794656	3.3919	1.7023e-07	0.4345	5354	0.00281049	0.15309	0.914984	0.0286936	-0.181897	-0.244147	0.000714374	0.334987	Buffering	Buffering	Scaling	Buffering
800	PAK1	1.28161e-05	0.409909	41.6845	0.269303	0.171599	-6.92989	0.161001	0.23831	5357	0.0770892	0.117861	0.81389	0.710082	-0.0498468	-5.05843	0.248393	0.167708	Buffering	Buffering	Scaling	Anti-Scaling
801	PAK1IP1	3.82737e-17	0.510045	0.615529	5.43992e-14	-0.555329	-0.19436	2.85326e-29	1.06537	5358	0.00263747	0.229468	0.685378	0.00340139	-0.226455	-0.186524	7.71304e-06	0.455922	Buffering	Buffering	Scaling	Scaling
802	PAK4	0.0151832	0.201725	0.286252	0.00867452	-0.163984	0.50476	0.000138386	0.365709	5360	0.0276532	0.254541	0.875495	0.277254	-0.121559	-0.971675	0.0104484	0.376099	Scaling	Buffering	Buffering	Buffering
803	PANX1	7.44723e-06	0.314852	0.560122	1.56487e-07	-0.364515	-1.08037	4.43587e-14	0.679368	5373	0.112098	0.21193	1.54573	0.933237	0.0116396	-3.99652	0.252586	0.200291	Buffering	Buffering	Scaling	Scaling
804	PAWR	0.00510918	0.209446	0.516144	2.34358e-07	-0.396254	-3.02168	1.03901e-10	0.6057	5404	0.566317	0.0424654	0.913122	0.0019346	-0.24645	-0.45389	0.00232444	0.288915	Buffering	Buffering	Buffering	Scaling
805	PAX8	0.00996835	0.285792	0.124459	0.109603	-0.417485	0.584624	0.0116434	0.703277	5406	0.0338776	0.267531	0.686729	0.105015	-0.291038	-0.754784	0.00895464	0.558568	Scaling	Scaling	Scaling	Scaling
806	PBX2	8.78642e-05	0.405436	0.439773	0.00111697	-0.414984	0.705563	2.96744e-08	0.82042	5415	0.940482	0.00618265	-13.1908	0.837382	0.0213112	31.8394	0.899231	-0.0151285	Buffering	Buffering	Scaling	Scaling
807	PC	0.00073542	0.25857	-0.313274	0.406588	0.0624044	-0.237017	0.0246405	0.196165	5417	0.216503	0.0866955	-4.31337	0.605131	-0.0382254	-0.467614	0.113737	0.124921	Buffering	Buffering	Scaling	Buffering
808	PCBP2	2.65153e-05	0.309502	0.966917	7.66469e-13	-0.52871	-0.395338	1.09463e-17	0.838212	5421	0.0250305	0.101289	0.28896	8.58728e-06	-0.155662	-0.11006	3.43524e-06	0.256951	Buffering	Buffering	Scaling	Scaling
809	PCDH7	0.266377	-0.271682	1.99624	7.07532e-07	-0.569426	2.34757	0.220411	0.297744	5428	0.831027	0.0387374	2.05554	0.00163856	-0.371241	-1.18542	0.0480743	0.409979	Buffering	Scaling	Anti-Scaling	Scaling
810	PCF11	0.317128	0.0962693	-60.787	0.0379977	-0.1996	-1.56321	0.0120604	0.295869	5431	0.00505913	0.174054	0.393858	0.936868	-0.00571949	-1.15371	0.0210576	0.179773	Buffering	Buffering	Buffering	Buffering
811	PCNT	7.93022e-05	0.414346	-1.30232	2.64351e-08	-0.374213	-0.282053	4.94036e-11	0.788559	5445	0.203785	0.0772364	0.273161	6.03256e-05	-0.183407	-0.424046	0.000502128	0.260643	Buffering	Buffering	Scaling	Scaling
812	PCP4	0.639018	-0.157805	52.6406	0.0261018	-0.539375	-14.6518	0.290209	0.38157	5448	0.28752	0.445761	181.216	0.0494465	-0.543485	-1.59058	0.0384089	0.989247	Scaling	Scaling	Anti-Scaling	Scaling
813	PDCD5	1.84024e-06	0.530965	0.603456	0.0149125	-0.242627	-6.51971	3.99249e-08	0.773592	5460	0.000113926	0.297651	0.390993	0.435633	-0.0680711	-0.469116	0.000514525	0.365722	Scaling	Buffering	Scaling	Buffering
814	PDCD6	5.08677e-19	0.481767	0.499643	1.29057e-08	-0.441345	-0.353717	8.31722e-21	0.923112	5461	0.000738587	0.18793	0.817922	2.75817e-05	-0.306251	-0.0677988	1.51445e-08	0.494181	Buffering	Scaling	Scaling	Scaling
815	PDCL3	0.0332832	0.141695	0.419942	0.500637	-0.084703	1.73135	0.105429	0.226398	5464	0.351953	-0.0663999	-2.41063	0.771846	-0.0271783	4.72214	0.719549	-0.0392216	Buffering	Buffering	Buffering	Buffering
816	PDK1	0.881048	0.0170825	-0.563869	0.000990749	-0.530858	-0.377852	0.00245089	0.54794	5484	0.713354	-0.0462143	-3.80007	0.996248	-0.000870567	-2462.06	0.831547	-0.0453437	Buffering	Buffering	Buffering	Scaling
817	PDS5A	0.000115574	0.37427	1.22228	1.025e-22	-0.482659	-0.309297	4.57816e-12	0.856929	5497	0.0321587	0.102484	0.107155	0.0220506	-0.0761929	-1.1234	0.000923618	0.178677	Buffering	Buffering	Scaling	Scaling
818	PDXK	0.0575563	0.134494	-31.0674	2.90554e-10	-0.341399	-0.413279	7.3771e-09	0.475893	5501	0.538309	0.051567	1.22848	0.00191539	-0.193013	-0.435958	0.0102528	0.24458	Buffering	Buffering	Buffering	Scaling
819	PEBP1	0.00307815	0.193803	0.26222	3.024e-10	-0.505	2.19947	1.62027e-13	0.698804	5509	0.134331	0.11008	0.685114	2.53202e-05	-0.308782	-0.224817	1.00974e-05	0.418862	Buffering	Scaling	Buffering	Scaling
820	PEPD	0.000310417	0.458524	0.606009	1.78239e-07	-0.505002	-8.11373	2.46491e-10	0.963526	5516	0.143098	0.0982654	0.734305	0.00257859	-0.178313	-0.189977	0.000656281	0.276578	Buffering	Buffering	Scaling	Scaling
821	PEX6	0.114073	0.187144	-183.247	0.0321194	-0.314298	-1.55156	0.00209496	0.501441	5528	0.57622	-0.0464097	2.42271	0.183105	-0.165191	-1.82894	0.343724	0.118781	Buffering	Buffering	Buffering	Scaling
822	PFDN5	0.00028083	0.249478	0.209686	2.01152e-05	-0.275023	0.294082	1.00713e-09	0.524501	5534	0.249171	-0.0628597	-1.03209	0.623485	0.0354362	1.46691	0.203424	-0.0982958	Buffering	Buffering	Buffering	Scaling
823	PFDN6	0.000315559	0.28531	1.34368	5.37607e-08	-0.541928	-0.627282	1.23462e-12	0.827238	5535	0.53688	0.0263638	0.863209	0.767869	0.0114839	0.547391	0.725705	0.0148799	Buffering	Buffering	Scaling	Scaling
824	PFKL	0.00706468	0.202913	-0.510401	0.00186916	-0.20686	-0.416888	2.36871e-06	0.409774	5539	0.13037	0.0902101	0.39919	9.62456e-06	-0.189171	-0.155581	8.0324e-05	0.279381	Buffering	Buffering	Buffering	Buffering
825	PFKM	8.66811e-05	0.363869	1.45203	1.48012e-07	-0.561484	-0.894644	3.34404e-12	0.925353	5540	0.0671221	0.169924	1.14116	0.0143815	-0.278395	-0.668363	0.0011724	0.448319	Buffering	Scaling	Scaling	Scaling
826	PGAM2	0.00200502	0.46034	0.777476	0.270178	0.164223	0.943876	0.0991184	0.296117	5545	0.437375	0.055982	13.6963	0.0836329	0.0991878	0.916375	0.570478	-0.0432057	Buffering	Buffering	Scaling	Anti-Scaling
827	PGK2	0.439713	-0.0478342	5.33045	0.650465	-0.0328548	2.96014	0.86102	-0.0149794	5552	0.175813	-0.0840385	-0.706671	0.427091	0.0744781	1.63916	0.113338	-0.158517	Buffering	Buffering	Buffering	Buffering
828	PGM2	0.040182	0.231191	-0.87098	1.10318e-13	-0.530209	-0.475986	2.10494e-08	0.761401	5557	0.220461	0.105608	0.32418	4.55667e-09	-0.231884	-0.306679	0.00145158	0.337492	Buffering	Buffering	Buffering	Scaling
829	PGM2L1	0.520623	0.0774966	0.808318	0.0094398	-0.265693	0.679243	0.012079	0.343189	5558	0.69303	0.0489932	-7.43964	0.433716	0.0963326	27.3703	0.759818	-0.0473395	Buffering	Buffering	Buffering	Scaling
830	PHF14	1.40667e-06	0.319724	1.0407	4.19677e-07	-0.43413	-0.767195	1.20335e-13	0.753854	5580	0.68298	-0.0246879	1.57785	0.0621254	-0.119053	-1.08461	0.20259	0.0943647	Buffering	Buffering	Scaling	Scaling
831	PHLDB1	0.0197517	0.151316	0.939375	0.0328839	-0.111958	13.7589	0.000401164	0.263274	5597	0.994139	0.000561937	2.01233	0.264377	0.0676594	0.381309	0.420576	-0.0670975	Buffering	Buffering	Buffering	Buffering
832	PICALM	1.98351e-05	0.279382	-1.01689	0.000981451	-0.236436	-0.376226	7.42774e-09	0.515817	5615	0.00878938	0.140008	0.254372	0.238435	-0.0648455	-1.56831	0.00258005	0.204853	Buffering	Buffering	Scaling	Buffering
833	PIGO	0.000367151	0.256487	0.498097	5.51409e-16	-0.434991	-1.30999	9.6819e-17	0.691478	5623	0.450787	0.0524219	0.718767	0.0121487	-0.151937	-0.807113	0.00421104	0.204359	Buffering	Buffering	Scaling	Scaling
834	PIH1D1	0.107706	0.12205	-1.34855	8.31173e-19	-0.480194	-0.177906	7.53359e-11	0.602244	5630	0.0593582	0.118976	0.386814	0.256895	0.0902313	1.20386	0.728527	0.028745	Buffering	Buffering	Buffering	Scaling
835	PIP4K2C	3.23372e-06	0.328288	0.163457	1.50567e-10	-0.482653	0.377704	1.16586e-17	0.810941	5647	0.00216087	0.250942	0.594216	0.000649468	-0.257294	-0.216173	8.5795e-07	0.508236	Scaling	Scaling	Scaling	Scaling
836	PITPNM1	0.040908	0.177567	-0.491771	0.355216	-0.074879	-0.293992	0.013018	0.252446	5658	0.963703	0.00342019	-1.73283	0.611374	-0.0288455	-0.381532	0.697001	0.0322657	Buffering	Buffering	Buffering	Buffering
837	PLAA	3.66622e-08	0.340108	0.18605	6.46925e-26	-0.501472	1.70673	2.61676e-27	0.84158	5679	1.34104e-05	0.248065	0.154981	1.92701e-09	-0.251422	-0.226948	7.64835e-13	0.499487	Buffering	Scaling	Scaling	Scaling
838	PLAUR	0.351756	0.119482	-0.893846	0.00254823	-0.364026	-0.818522	0.00149803	0.483508	5682	0.819611	-0.0323054	-5.66569	0.311256	-0.166347	-1.9609	0.483236	0.134042	Buffering	Buffering	Buffering	Scaling
839	PLCB3	0.00982633	0.20522	-0.603694	0.000986549	-0.271161	-0.324675	2.07308e-06	0.476381	5687	0.0241004	0.117975	0.522939	0.0238773	-0.11821	-0.215758	0.000287225	0.236186	Buffering	Buffering	Buffering	Scaling
840	PLD3	0.0786409	0.197728	-3.27847	0.168895	-0.133606	-1.31282	0.0112595	0.331333	5696	0.0693286	0.262961	1.39605	0.181997	-0.120502	-0.362696	0.0106175	0.383463	Scaling	Buffering	Buffering	Buffering
841	PLEKHF1	0.00523998	0.327723	0.321589	0.0755617	0.188277	0.572032	0.288511	0.139446	5707	0.605803	-0.0546288	-1.14151	0.504983	0.107806	4.55089	0.319397	-0.162435	Buffering	Anti-Scaling	Scaling	Anti-Scaling
842	PLXNC1	0.796715	0.0257967	-7.79011	0.236883	-0.133782	-2.56252	0.1728	0.159579	5749	0.241496	-0.126297	-1.79383	0.514403	0.0681097	1.73978	0.140984	-0.194407	Anti-Scaling	Buffering	Buffering	Buffering
843	PNKD	0.000302577	0.239567	0.171663	0.000619258	-0.26488	0.234615	2.81884e-07	0.504447	5762	0.328863	0.100046	1.68004	0.0046562	-0.223278	-0.156923	0.00900365	0.323324	Buffering	Buffering	Buffering	Scaling
844	PNKP	0.0130409	0.200109	0.906108	8.29335e-09	-0.382489	-0.756595	2.61474e-09	0.582598	5763	0.0639537	0.1867	0.524718	0.0521143	-0.168297	-0.842887	0.00293954	0.354998	Buffering	Buffering	Buffering	Scaling
845	POFUT2	6.48257e-09	0.3301	-1.87505	3.86105e-09	-0.236201	-0.176383	1.85568e-17	0.566301	5783	0.0651626	0.219323	0.600627	0.0493224	-0.12113	-0.7577	0.00883375	0.340453	Buffering	Buffering	Scaling	Buffering
846	POLA2	0.0120112	0.158343	-0.205378	0.000287458	-0.214635	-0.110767	3.16584e-07	0.372978	5788	0.523519	-0.0808383	-1.74698	0.862163	-0.0209597	-3.02771	0.702152	-0.0598786	Buffering	Buffering	Buffering	Buffering
847	POLD1	0.00181726	0.254398	-0.258521	2.31908e-10	-0.424477	-0.154709	5.79596e-12	0.678875	5790	0.146947	0.121905	1.37295	0.676906	0.0269153	-1.76281	0.291352	0.0949893	Buffering	Buffering	Scaling	Scaling
848	POLD2	0.0250459	0.132478	-0.183074	9.00664e-09	-0.419635	-0.167642	7.19811e-11	0.552113	5791	0.239467	-0.0691454	-0.562552	0.0178367	-0.1152	-0.196621	0.432324	0.0460541	Buffering	Buffering	Buffering	Scaling
849	POLD3	0.00266754	0.198971	6714.22	0.0256205	-0.199338	-1.18619	9.86822e-05	0.398309	5792	0.0815222	0.179592	0.931283	0.242201	-0.0975856	-1.16259	0.0190548	0.277178	Buffering	Buffering	Buffering	Buffering
850	POLR1C	2.41371e-08	0.329755	1.63901	6.52746e-11	-0.514468	-0.238099	6.15722e-20	0.844223	5806	0.170748	0.058331	0.335016	0.294458	-0.0724749	-0.935381	0.064881	0.130806	Buffering	Buffering	Scaling	Scaling
851	POLR1E	0.000949762	0.280231	-0.561867	7.89494e-13	-0.455618	-0.229553	8.02329e-15	0.735849	5808	0.962178	0.00333676	5.86178	0.20202	-0.0690574	-0.948889	0.283073	0.0723941	Buffering	Buffering	Scaling	Scaling
852	POLR2D	0.622847	0.0322831	-0.269931	0.0502971	-0.217649	-0.335409	0.0420709	0.249932	5812	0.394654	-0.0349348	-2.37394	0.0733708	0.284072	0.696427	0.0492855	-0.319007	Buffering	Anti-Scaling	Buffering	Buffering
853	POLR2G	0.25644	0.0726663	-4.42157	1.39838e-05	-0.254639	-0.430428	2.11377e-05	0.327305	5815	0.00937531	0.166378	0.453052	0.575752	0.0400851	4.53792	0.157727	0.126293	Buffering	Buffering	Buffering	Scaling
854	POLR2I	0.00283465	0.21829	0.20062	1.47069e-07	-0.357963	0.879054	9.10661e-10	0.576253	5817	0.336187	0.0753239	0.708441	0.551082	-0.0454447	-22.983	0.211379	0.120769	Buffering	Buffering	Buffering	Scaling
855	POLR3B	2.82311e-09	0.310577	0.217225	1.26596e-12	-0.537058	-0.647188	4.75832e-22	0.847636	5823	0.964902	0.00289202	5.76996	0.840482	-0.0182247	-10.9793	0.823618	0.0211167	Buffering	Buffering	Scaling	Scaling
856	PPFIA1	3.38375e-05	0.219044	-1.1019	0.0295294	-0.140318	-0.482157	2.19266e-06	0.359363	5858	0.0730126	0.0802306	0.953143	0.268999	0.0748966	2.55611	0.942239	0.005334	Buffering	Buffering	Buffering	Buffering
857	PPHLN1	3.69663e-05	0.199222	0.369594	1.71329e-07	-0.275163	-0.996175	2.25805e-12	0.474385	5861	0.360674	0.0762001	1.21714	0.322126	-0.0575591	-1.83394	0.134983	0.133759	Buffering	Buffering	Buffering	Scaling
858	PPIA	2.08874e-08	0.256402	-0.931169	9.90564e-14	-0.42469	-0.185915	2.24928e-23	0.681093	5862	0.00255078	0.137627	0.240491	9.05149e-06	-0.236099	-0.149169	9.78144e-09	0.373726	Buffering	Buffering	Scaling	Scaling
859	PPIG	0.000144342	0.236512	0.334863	2.58329e-05	-0.475293	-0.97182	2.87595e-08	0.711805	5868	0.0599565	0.150558	0.434329	2.23107e-06	-0.240005	-0.043079	9.77966e-05	0.390563	Buffering	Buffering	Buffering	Scaling
860	PPIL1	2.92882e-08	0.36235	6.86297	1.74287e-10	-0.618595	-0.289616	2.83891e-18	0.980945	5870	0.147127	0.0816291	0.564233	0.000549532	-0.191181	-0.171104	0.000118421	0.27281	Buffering	Buffering	Scaling	Scaling
861	PPIL3	0.40954	0.0915669	-1.76525	0.0125233	-0.38124	-0.727253	0.00839399	0.472806	5872	0.894856	-0.0157492	-2.67238	0.419295	0.0656199	2.54989	0.54305	-0.0813691	Buffering	Buffering	Buffering	Scaling
862	PPM1H	0.0253564	0.272292	8.90515	7.96077e-11	-0.795022	-0.619959	7.01841e-12	1.06731	5881	0.0564056	0.222108	0.96301	0.0637691	-0.322785	-1.0679	0.00555609	0.544893	Buffering	Scaling	Scaling	Scaling
863	PPME1	0.00485529	0.20417	2.132	0.0464422	-0.153926	-1.49002	0.000148972	0.358097	5884	0.0521723	0.127814	0.489393	0.529283	-0.0384423	-13.4245	0.0409829	0.166257	Buffering	Buffering	Buffering	Buffering
864	PPP1CA	0.00357413	0.219238	-3.56294	0.000255581	-0.245415	-0.377568	1.49989e-07	0.464653	5886	0.857829	-0.00745339	1.46765	0.796155	-0.00991604	1.12184	0.961936	0.00246265	Buffering	Buffering	Buffering	Buffering
865	PPP1CC	2.24053e-05	0.272342	3.3122	1.2017e-09	-0.528547	-0.444619	1.03099e-15	0.800889	5888	0.748502	-0.0139722	3.57087	0.453648	0.0221179	0.258494	0.442606	-0.0360901	Buffering	Buffering	Scaling	Scaling
866	PPP1R10	0.532381	0.0382065	5.9194	0.157383	-0.117599	-2.20894	0.0754449	0.155805	5889	0.193403	0.0720508	0.69654	0.347372	-0.0512272	-0.690977	0.0543709	0.123278	Buffering	Buffering	Buffering	Buffering
867	PPP1R11	1.31975e-06	0.258205	0.202157	6.38423e-07	-0.317588	0.490451	6.55241e-15	0.575793	5890	0.220193	0.0783833	0.83064	0.00188265	-0.236365	-0.201701	0.000278539	0.314749	Buffering	Buffering	Scaling	Scaling
868	PPP1R12A	2.89591e-09	0.324533	0.437614	6.47576e-12	-0.512981	-0.428973	3.68209e-21	0.837513	5891	0.474195	0.0317976	0.271171	0.00010138	-0.212353	-0.294899	7.80217e-05	0.244151	Buffering	Buffering	Scaling	Scaling
869	PPP1R12C	0.000838608	0.327015	-0.329256	3.92799e-06	-0.379368	-0.24525	2.23558e-09	0.706384	5893	0.800393	-0.0142592	0.286414	0.0155699	-0.205313	-0.731158	0.0212187	0.191054	Buffering	Buffering	Scaling	Scaling
870	PPP1R13L	0.137408	0.170309	1.95737	2.78426e-08	-0.468022	-0.803525	5.2918e-07	0.638331	5895	0.369465	0.0959427	0.444899	0.00760364	-0.29947	-0.510804	0.0028874	0.395413	Buffering	Scaling	Buffering	Scaling
871	PPP1R14A	0.046401	0.399269	1.01095	0.688188	-0.0556587	1.16902	0.03452	0.454928	5896	0.0477088	0.498752	5.45253	0.848653	0.0460509	-1.81411	0.132381	0.452701	Scaling	Buffering	Scaling	Buffering
872	PPP1R14B	0.00404181	0.210222	-4.66334	3.18791e-06	-0.411707	-0.571715	1.26111e-09	0.621929	5897	0.158203	0.131554	19.1299	0.378554	-0.097761	-0.858543	0.0733672	0.229315	Buffering	Buffering	Buffering	Scaling
873	PPP1R7	0.79814	0.0180541	-1.06692	4.25761e-06	-0.412694	-0.241561	2.55027e-05	0.430749	5908	0.061307	0.145294	0.346975	0.402223	-0.0643013	-1.32989	0.0415966	0.209596	Buffering	Buffering	Buffering	Scaling
874	PPP2R1A	0.0107349	0.168891	0.413813	8.3193e-08	-0.273936	-2.38468	2.31307e-08	0.442827	5914	0.274157	-0.0417404	0.823162	0.262822	-0.0402449	0.615575	0.969458	-0.00149555	Buffering	Buffering	Buffering	Scaling
875	PPP2R1B	0.000158749	0.267948	-0.471025	8.3734e-07	-0.363433	-0.214907	6.73894e-12	0.631381	5915	0.536971	-0.025144	1.04996	0.607877	0.0284042	0.629953	0.384394	-0.0535482	Buffering	Buffering	Scaling	Scaling
876	PPP2R5D	8.77942e-10	0.334226	2.03578	4.85226e-08	-0.430436	-0.294113	2.32233e-16	0.764662	5922	0.00385657	0.171417	0.337975	4.46995e-09	-0.246831	-0.02825	1.23974e-09	0.418248	Buffering	Buffering	Scaling	Scaling
877	PPP4R1	0.0323403	0.196022	1.37011	1.44053e-20	-0.54873	-0.860733	3.62205e-12	0.744752	5929	0.00337557	0.159714	0.165154	0.000216977	-0.165902	-0.515059	4.74669e-07	0.325615	Buffering	Buffering	Buffering	Scaling
878	PPP5C	0.00778304	0.33894	-1.95656	2.24535e-05	-0.373731	-0.44584	8.62904e-07	0.712671	5933	0.00253314	0.203757	0.1841	0.000254652	-0.22672	-0.298372	1.13719e-06	0.430477	Buffering	Buffering	Scaling	Scaling
879	PPTC7	0.022905	0.151822	0.950645	8.15806e-08	-0.348608	-0.745553	2.52901e-09	0.50043	5939	0.446666	-0.0681733	-4.50938	0.163989	-0.17275	-1.30496	0.426021	0.104576	Buffering	Buffering	Buffering	Scaling
880	PRCP	3.34152e-05	0.326102	0.361932	4.77891e-08	-0.496181	3.38343	1.922e-13	0.822283	5949	0.172964	0.163204	2.19476	0.000437301	-0.242699	-0.170582	0.00182614	0.405903	Buffering	Buffering	Scaling	Scaling
881	PRDX5	0.0337162	0.132185	0.228439	0.00525166	-0.219747	0.672448	5.68091e-05	0.351933	5957	0.318812	0.0986107	1.96595	0.0623549	-0.232702	-0.919263	0.0186932	0.331313	Buffering	Buffering	Buffering	Buffering
882	PRG2	0.0787869	0.111572	-0.166893	0.895323	-0.00775139	-0.117117	0.106519	0.119323	5965	0.616879	-0.0857575	-2.16993	0.275985	0.205165	3.43578	0.167215	-0.290922	Buffering	Anti-Scaling	Buffering	Buffering
883	PRIM1	0.414575	0.0819469	-0.317594	0.00444668	-0.272006	-0.205264	0.00254051	0.353953	5967	0.689861	0.0426662	4.89154	0.295862	-0.115754	-0.932826	0.175161	0.15842	Buffering	Buffering	Buffering	Scaling
884	PRKAA1	1.53277e-07	0.330447	-0.76994	0.000116698	-0.410431	-0.23607	7.93609e-10	0.740879	5969	0.129573	0.0634159	0.712817	0.00530097	-0.141832	-0.151078	0.000571511	0.205248	Buffering	Buffering	Scaling	Scaling
885	PRKAB1	0.0159588	0.158032	0.685673	5.91208e-11	-0.557559	-0.728206	1.21691e-13	0.715591	5971	0.024564	0.149672	0.389265	0.00740292	-0.18995	-0.422317	0.000150945	0.339622	Buffering	Buffering	Buffering	Scaling
886	PRKAG1	0.000505982	0.293386	-0.811081	3.11431e-05	-0.38487	-0.368108	2.67521e-09	0.678256	5975	0.0786793	0.123522	0.451217	0.000739607	-0.245927	-0.456681	0.000100006	0.369449	Buffering	Buffering	Scaling	Scaling
887	PRKAR1B	0.000116786	0.260308	-1.27833	9.95925e-06	-0.301964	-0.306319	2.80659e-11	0.562272	5978	0.334927	0.0856143	13.8222	0.699597	0.0342538	-2.82575	0.611283	0.0513606	Buffering	Buffering	Scaling	Scaling
888	PRKD2	0.00015609	0.337174	3.49056	1.44913e-09	-0.372683	-0.30046	9.85038e-12	0.709856	5990	0.000834327	0.186984	0.100592	0.604393	-0.0412795	6.38116	0.00731783	0.228263	Buffering	Buffering	Scaling	Scaling
889	PRKRA	0.0271101	0.178061	1.18408	0.286043	-0.137943	-7.44915	0.0342229	0.316004	5994	0.00585923	0.182796	0.288453	0.732945	-0.0483657	-2.01339	0.138747	0.231162	Buffering	Buffering	Buffering	Buffering
890	PRMT1	0.000917942	0.330971	-0.398549	2.4118e-08	-0.44258	-0.216352	8.03368e-11	0.773551	5997	0.0627258	0.155049	0.329315	0.0721793	-0.123859	-3.41666	0.00329533	0.278908	Buffering	Buffering	Scaling	Scaling
891	PRPF19	0.0202568	0.152012	-0.151178	0.254617	-0.0868197	-0.185875	0.00529389	0.238832	6013	0.484603	0.0355319	0.662271	0.53996	0.0337939	0.676613	0.980076	0.00173794	Buffering	Buffering	Buffering	Buffering
892	PRPF31	0.000273991	0.302954	0.865814	1.68083e-14	-0.468094	-0.393614	9.85789e-14	0.771048	6015	0.0313413	0.114408	0.227323	0.332212	0.044392	0.314426	0.20798	0.0700164	Buffering	Buffering	Scaling	Scaling
893	PRPF40A	0.000449893	0.228745	-9.28299	0.000565194	-0.349071	-0.394527	1.26024e-06	0.577815	6020	0.296615	0.0668941	0.384511	0.0554839	-0.0934761	-0.417423	0.0359867	0.16037	Buffering	Buffering	Buffering	Scaling
894	PRPF4B	4.23566e-13	0.496378	-0.671253	5.19789e-06	-0.440455	-0.236905	4.18627e-16	0.936832	6022	0.290556	0.0508025	0.549975	0.0172429	-0.141165	-0.338708	0.00482347	0.191967	Buffering	Buffering	Scaling	Scaling
895	PRPH	0.0422225	0.230474	1.82231	0.000570954	-0.328082	-2.25428	1.80884e-05	0.558556	6025	0.805546	-0.0265525	-11.1646	0.44021	-0.0759086	-2.16684	0.700528	0.0493562	Buffering	Buffering	Buffering	Scaling
896	PRSS23	0.0252983	0.300607	-0.576954	0.199753	-0.168527	-0.400186	0.00374097	0.469133	6044	0.790982	-0.0405311	-3.20137	0.399695	0.18061	3.74228	0.349448	-0.221141	Buffering	Anti-Scaling	Scaling	Buffering
897	PSIP1	2.09195e-10	0.479835	0.452183	3.08834e-21	-0.567892	-0.472607	1.53195e-30	1.04773	6055	0.000371763	0.319554	0.342179	1.36503e-06	-0.304574	-0.423207	1.9745e-09	0.624129	Scaling	Scaling	Scaling	Scaling
898	PSMA2	0.0102605	0.180054	-3.58157	1.35978e-05	-0.307212	-0.452975	3.39854e-08	0.487265	6057	0.273879	0.0350966	0.211816	0.420807	-0.0304475	-1.08581	0.0725059	0.0655442	Buffering	Buffering	Buffering	Scaling
899	PSMB8	0.433637	-0.103957	1.55627	0.00664639	-0.32139	0.678169	0.159138	0.217433	6072	0.92731	-0.00778087	-4.07818	0.87899	-0.00809851	-0.569954	0.997125	0.000317647	Buffering	Buffering	Anti-Scaling	Scaling
900	PSMB9	0.967224	-0.00742628	2.8496	0.188163	-0.226806	1.55226	0.310634	0.21938	6073	0.94085	-0.00842172	-8.52673	0.915819	-0.00743534	-1.2923	0.993413	-0.000986375	Buffering	Buffering	Buffering	Buffering
901	PSMC4	0.00104901	0.399338	2.89351	1.22844e-06	-0.377518	-0.646429	4.1099e-08	0.776857	6077	0.468239	0.0230769	0.184084	0.0948073	0.0744669	0.238726	0.26406	-0.05139	Buffering	Buffering	Scaling	Scaling
902	PSMD1	0.176473	0.0876354	-0.392984	0.0781696	-0.169794	-0.331456	0.0197008	0.25743	6080	0.088786	0.0679148	0.156585	0.481257	0.0289417	0.244374	0.462723	0.0389731	Buffering	Buffering	Buffering	Buffering
903	PSMD14	0.789439	-0.0193116	-0.343054	0.00369652	-0.389138	-0.410935	0.0103819	0.369827	6085	0.579353	-0.0297981	1.02082	0.536013	-0.0511654	6.28095	0.821472	0.0213673	Buffering	Buffering	Buffering	Scaling
904	PSMD8	0.000188765	0.450311	1.14292	8.52793e-09	-0.437737	-0.777853	3.73906e-10	0.888048	6092	0.331038	0.0415631	0.225849	0.149227	0.0520465	0.125138	0.822104	-0.0104833	Buffering	Buffering	Scaling	Scaling
905	PSMD9	0.0850879	0.107171	17.9175	5.82539e-11	-0.416693	-0.323033	5.813e-11	0.523864	6093	0.870817	-0.00862621	0.943565	2.61501e-05	-0.18659	-0.16564	0.00278821	0.177964	Buffering	Buffering	Buffering	Scaling
906	PSMG3	6.70792e-07	0.305543	-6.88342	1.47035e-09	-0.418328	-0.302641	6.34396e-18	0.723871	6101	0.291278	0.114847	1.30412	0.00139855	-0.30923	-0.41659	0.000892795	0.424077	Buffering	Scaling	Scaling	Scaling
907	PSPH	0.177537	0.116983	-0.826246	6.83549e-08	-0.534769	-0.425234	2.05164e-08	0.651752	6104	0.0270751	0.266791	1.25332	0.000177594	-0.259548	-0.172562	0.000112388	0.526339	Scaling	Scaling	Buffering	Scaling
908	PTGES3	2.87722e-05	0.221537	-0.441792	7.30885e-14	-0.535598	-0.193813	8.61048e-20	0.757135	6119	0.202913	0.0840405	0.664053	1.12777e-05	-0.28249	-0.183116	1.08916e-05	0.366531	Buffering	Scaling	Buffering	Scaling
909	PTK7	2.13635e-05	0.319261	0.524239	0.0303071	-0.213437	2.39174	1.79409e-06	0.532698	6127	0.892499	0.00957777	4.13013	0.42019	-0.0781021	-1.80727	0.412734	0.0876798	Buffering	Buffering	Scaling	Buffering
910	PTMA	0.0300523	0.136967	0.268012	0.00196089	-0.266405	0.688689	7.45525e-05	0.403372	6128	0.492326	-0.0841729	-1.84534	0.00185723	-0.320136	-0.194458	0.0939934	0.235963	Buffering	Scaling	Buffering	Scaling
911	PTPN11	1.22901e-09	0.41006	-1.46913	6.42472e-10	-0.453219	-0.232717	6.69229e-20	0.86328	6137	0.0428058	0.092065	0.249554	8.49812e-09	-0.286831	-0.0981525	3.4621e-09	0.378896	Buffering	Scaling	Scaling	Scaling
912	PTPN2	1.53431e-07	0.280419	0.189222	4.70622e-35	-0.490785	-2.0927	2.87937e-28	0.771204	6142	0.00769564	0.182308	0.255625	0.000113715	-0.172579	-0.395732	7.21909e-06	0.354887	Buffering	Buffering	Scaling	Scaling
913	PTPRM	0.000716112	0.43577	-45.8528	0.000185127	-0.324524	-0.898084	2.47821e-08	0.760295	6154	0.950054	-0.0057698	1.76956	0.205741	0.102565	1.13149	0.305637	-0.108335	Buffering	Anti-Scaling	Scaling	Scaling
914	PTS	1.77584e-05	0.360531	0.745097	2.19996e-08	-0.443916	-0.922576	1.27513e-14	0.804447	6160	0.00132141	0.517586	0.874894	0.0730768	-0.21027	-0.517106	4.59251e-05	0.727856	Scaling	Buffering	Scaling	Scaling
915	PTTG1IP	0.00568032	0.225495	0.879849	4.44249e-13	-0.471913	-0.651209	8.92847e-13	0.697408	6161	0.615971	0.0922067	14.9191	0.000427215	-0.330661	-0.409866	0.0354175	0.422868	Buffering	Scaling	Buffering	Scaling
916	PURB	0.0483811	0.0836754	0.725048	2.45631e-10	-0.317471	-0.468055	7.84106e-12	0.401146	6169	0.459561	0.0462099	0.483651	1.94766e-07	-0.379191	-0.188515	1.85876e-07	0.425401	Buffering	Scaling	Buffering	Scaling
917	PUS1	0.00861815	0.183787	-1.78582	1.92202e-08	-0.448538	-0.370999	6.29611e-11	0.632325	6170	0.0195109	0.171238	0.696172	0.0446432	-0.170426	-0.527227	0.000895646	0.341664	Buffering	Buffering	Buffering	Scaling
918	PWP1	4.70175e-09	0.298607	7.46632	2.85721e-12	-0.431697	-0.223475	1.82735e-21	0.730304	6178	0.105886	0.082627	0.257422	0.0363941	-0.156408	-0.948744	0.00333149	0.239035	Buffering	Buffering	Scaling	Scaling
919	PWP2	1.10028e-06	0.38181	-5.99904	3.59363e-15	-0.410563	-0.216202	7.40353e-17	0.792373	6179	0.632038	0.0331883	1.00103	0.276144	-0.0424797	-1.07388	0.27458	0.0756679	Buffering	Buffering	Scaling	Scaling
920	PXN	0.00168791	0.180561	-0.801695	4.36734e-07	-0.278605	-0.202125	3.14456e-10	0.459166	6185	0.107404	0.0812657	0.388086	0.00192594	-0.180011	-0.294527	0.000143096	0.261277	Buffering	Buffering	Buffering	Scaling
921	PYGM	0.789539	0.0255262	36.4048	0.0639713	0.178549	2.5559	0.162474	-0.153023	6192	0.17008	-0.146263	-1.91832	0.240388	0.121555	1.03271	0.045842	-0.267818	Anti-Scaling	Anti-Scaling	Buffering	Anti-Scaling
922	QDPR	5.5227e-05	0.418404	-2.37232	9.8785e-18	-0.482367	-0.240446	3.31418e-12	0.90077	6201	0.000850092	0.290802	0.141147	0.00292855	-0.150599	-0.532095	1.11985e-05	0.441401	Scaling	Buffering	Scaling	Scaling
923	RAB12	0.0712798	0.218879	-1.82916	1.77844e-06	-0.433665	-0.749354	5.20835e-07	0.652544	6222	0.505221	0.0463909	0.553326	0.000441188	-0.139084	-0.933682	0.0136272	0.185475	Buffering	Buffering	Buffering	Scaling
924	RAB1B	0.153739	0.130385	0.872899	0.00270224	-0.259038	2.50008	0.000279397	0.389422	6229	0.104981	0.0693636	0.225626	0.223839	-0.0738663	-27.7011	0.0382071	0.14323	Buffering	Buffering	Buffering	Scaling
925	RAB21	0.0157946	0.179931	-10.3844	1.17751e-05	-0.423756	-0.713898	2.82453e-08	0.603687	6231	0.475356	0.03452	0.5072	0.00212992	-0.163432	-0.301941	0.00141276	0.197952	Buffering	Buffering	Buffering	Scaling
926	RAB23	0.18478	0.125126	2.19075	4.15583e-08	-0.644039	-0.881935	5.15778e-09	0.769164	6233	0.569797	0.0427459	1.67607	0.776363	-0.0297469	-6.96716	0.503986	0.0724927	Buffering	Buffering	Buffering	Scaling
927	RAB31	0.152529	-0.179852	-0.78656	0.110989	-0.147381	-0.914344	0.803702	-0.0324713	6243	0.0305932	-0.203825	-0.730548	0.969322	-0.00245785	3.25348	0.0381788	-0.201367	Anti-Scaling	Buffering	Anti-Scaling	Buffering
928	RAB35	0.151923	0.0809645	1.2011	1.6983e-08	-0.365914	-0.627706	8.05066e-09	0.446879	6247	0.387988	-0.0327307	0.577019	0.0361012	-0.0802836	-28.4384	0.315274	0.0475529	Buffering	Buffering	Buffering	Scaling
929	RAB3GAP1	0.350832	0.0661481	0.249508	0.000140106	-0.464201	0.881092	6.96489e-05	0.530349	6253	0.0500256	0.108817	0.209329	0.790984	-0.012125	0.889303	0.0670391	0.120942	Buffering	Buffering	Buffering	Scaling
930	RAB3IP	5.76119e-06	0.351919	0.320717	1.65868e-13	-0.725964	-1.55009	1.62576e-20	1.07788	6256	0.00797834	0.197668	0.305813	0.709943	-0.021787	-4.92755	0.00986327	0.219455	Buffering	Buffering	Scaling	Scaling
931	RAB4B	0.0121669	0.297799	1.29773	8.02673e-06	-0.386899	-1.45124	5.60966e-07	0.684698	6259	0.873105	0.00569877	0.3192	0.410029	-0.0473882	-6.48049	0.380749	0.053087	Buffering	Buffering	Scaling	Scaling
932	RAB5B	0.0349779	0.149724	0.293712	2.81258e-05	-0.328912	0.6993	4.87501e-07	0.478636	6261	0.0241413	0.0791109	0.152129	0.0543008	-0.0946596	-0.756072	0.00173695	0.173771	Buffering	Buffering	Buffering	Scaling
933	RAB6A	2.31437e-08	0.327386	0.193088	0.000735389	-0.270321	1.09623	3.8558e-10	0.597707	6263	0.00115514	0.150444	0.18427	0.412242	-0.0438398	-3.17536	0.00280324	0.194283	Buffering	Buffering	Scaling	Scaling
934	RABAC1	1.13676e-07	0.572907	0.231376	1.48618e-10	-0.524491	1.00224	1.46697e-16	1.0974	6269	0.441409	0.0509024	1.02346	0.743059	-0.0336538	-2.22115	0.431047	0.0845562	Buffering	Buffering	Scaling	Scaling
935	RAC1	2.28547e-05	0.234873	1.63302	2.29662e-14	-0.438965	-0.250233	5.37402e-20	0.673838	6282	0.943562	-0.00377404	0.651454	0.195253	-0.0543082	1.06914	0.360363	0.0505342	Buffering	Buffering	Buffering	Scaling
936	RACGAP1	0.269159	0.0933798	-0.519904	8.02547e-07	-0.441808	-0.285069	6.60271e-07	0.535188	6284	0.156432	0.124403	0.493925	0.147141	-0.168547	-1.09039	0.0128499	0.29295	Buffering	Buffering	Buffering	Scaling
937	RAD9A	0.0029642	0.112922	-2.56802	0.128867	-0.0596743	-0.404151	0.000313768	0.172597	6293	0.435146	0.0593147	0.401341	0.55735	-0.0540676	1.36045	0.282891	0.113382	Buffering	Buffering	Buffering	Buffering
938	RAI14	0.000246529	0.315817	-10.9838	0.767857	-0.0400323	-1.319	0.0145772	0.355849	6297	0.366623	0.050461	1.34688	0.402306	-0.10816	-1.82838	0.23533	0.158621	Buffering	Buffering	Scaling	Buffering
939	RALA	0.000113075	0.241652	0.194326	8.72708e-08	-0.392651	0.556243	1.23374e-12	0.634303	6299	0.403776	0.0451161	0.458906	2.15154e-05	-0.203252	-0.243464	0.000194023	0.248368	Buffering	Buffering	Buffering	Scaling
940	RALB	0.406362	-0.0886463	1.78064	0.0492179	-0.253507	3.24131	0.287336	0.164861	6300	0.212618	0.0878953	0.343797	0.700552	-0.0213695	0.62837	0.186034	0.109265	Buffering	Buffering	Buffering	Scaling
941	RALBP1	1.69887e-07	0.447754	0.314625	4.59061e-21	-0.501714	1.8025	1.99171e-20	0.949467	6301	0.288689	0.0764394	1.26173	0.54996	-0.0301637	-1.521	0.158241	0.106603	Buffering	Buffering	Scaling	Scaling
942	RAN	0.00305583	0.183249	-0.761748	5.14153e-06	-0.35088	-0.363296	1.62563e-09	0.534128	6307	0.0643678	0.0799154	0.285425	0.00137124	-0.156785	-0.230828	4.4081e-05	0.236701	Buffering	Buffering	Buffering	Scaling
943	RANBP2	0.0028125	0.208018	1.79248	0.0212086	-0.309762	-1.1676	0.000585022	0.517781	6310	0.154269	0.0925497	0.355972	0.0518102	-0.0637367	-0.295608	0.0289045	0.156286	Buffering	Buffering	Buffering	Scaling
944	RANBP6	0.00303066	0.266463	1.25788	1.10981e-11	-0.434007	-0.892403	2.5065e-12	0.70047	6312	0.469835	0.0498318	0.56193	0.809175	-0.0152191	2.19333	0.248419	0.0650509	Buffering	Buffering	Scaling	Scaling
945	RANBP9	5.02355e-13	0.42992	1.34708	3.25212e-05	-0.354617	-0.420447	3.03602e-14	0.784537	6313	0.440821	0.0369236	1.21644	0.0359747	-0.113377	-0.277625	0.018996	0.1503	Buffering	Buffering	Scaling	Scaling
946	RAP1B	0.0147588	0.176363	0.35628	0.00024471	-0.31495	1.57095	8.57042e-07	0.491313	6317	0.728706	0.0176168	0.644155	0.202392	-0.0756786	-3.73332	0.192361	0.0932954	Buffering	Buffering	Buffering	Scaling
947	RASAL1	0.999334	9.69198e-05	0.467052	0.00139259	-0.328274	0.378063	0.0127006	0.328371	6336	0.904834	-0.0139083	-1.89038	0.160085	-0.173107	-0.783979	0.239442	0.159199	Buffering	Buffering	Buffering	Scaling
948	RBM14	0.247539	0.0605098	-0.54305	0.200991	0.0777894	-0.79696	0.802984	-0.0172795	6364	0.988663	0.000656228	1.1303	0.325165	-0.0440291	-4.233	0.443482	0.0446853	Buffering	Buffering	Buffering	Buffering
949	RBM19	1.98177e-05	0.255955	-0.533796	0.0388899	-0.120317	-0.236115	4.08238e-07	0.376272	6369	0.0201125	0.185917	0.52854	0.0271294	-0.171454	-0.447063	0.000332677	0.357371	Buffering	Buffering	Scaling	Buffering
950	RBM42	0.000134932	0.373237	0.539836	0.00297013	-0.223645	-10.7038	8.82241e-08	0.596882	6381	0.0162139	0.241565	0.585458	0.177078	0.134421	2.00131	0.298625	0.107144	Buffering	Anti-Scaling	Scaling	Buffering
951	RBM4B	0.454994	0.0396254	13.1686	0.00359649	-0.15522	-0.755913	0.00233876	0.194846	6384	0.0526869	0.107234	0.602053	0.700676	-0.0202495	-1.34082	0.0670217	0.127484	Buffering	Buffering	Buffering	Buffering
952	RBM7	0.237127	0.176278	4.27639	0.000381532	-0.449896	-2.30897	0.000231692	0.626174	6387	0.159784	0.110333	1.10874	0.478798	-0.0818755	-2.07815	0.142058	0.192208	Buffering	Buffering	Buffering	Scaling
953	RBMS1	0.000317414	0.284329	0.302948	0.00428172	-0.310925	1.12233	5.74644e-06	0.595255	6389	0.446522	-0.0562593	-2.00192	0.0233797	-0.207638	-0.354442	0.154532	0.151379	Buffering	Buffering	Scaling	Scaling
954	RBMS2	0.000163238	0.231906	0.197788	0.209061	-0.0621581	0.158538	1.88177e-05	0.294064	6390	0.686581	-0.0290274	-18.22	0.806905	-0.0169462	10.614	0.890532	-0.0120811	Buffering	Buffering	Buffering	Buffering
955	RBPJ	0.0346307	0.192287	-0.348276	4.3223e-25	-0.447935	-0.141008	1.49591e-08	0.640222	6397	0.0756355	0.132716	0.416569	0.10989	-0.0806072	-0.705535	0.0114323	0.213323	Buffering	Buffering	Buffering	Scaling
956	RCL1	4.58264e-06	0.337636	0.61207	8.48668e-32	-0.678997	-0.367519	4.6599e-28	1.01663	6411	0.487709	-0.0575059	-0.90241	0.433753	0.050787	-20.042	0.163774	-0.108293	Buffering	Buffering	Scaling	Scaling
957	RCN3	0.000599837	0.541202	0.376716	0.0584435	-0.250253	0.823221	5.08954e-06	0.791455	6414	0.797231	0.0359744	-4.59884	0.18747	-0.239149	-1.28648	0.140852	0.275123	Buffering	Buffering	Scaling	Scaling
958	RDH13	0.302099	0.103943	57.4737	3.91879e-09	-0.520074	-0.696448	2.29878e-07	0.624017	6421	0.659064	0.0439144	0.627844	0.00337223	-0.326451	-0.604074	0.00233055	0.370366	Buffering	Scaling	Buffering	Scaling
959	RDX	0.00347319	0.28935	-0.81041	4.52706e-06	-0.378227	-0.224716	8.89312e-09	0.667577	6423	0.0680376	0.0708332	0.164765	0.00220152	-0.115743	-0.33089	5.78326e-05	0.186576	Buffering	Buffering	Scaling	Scaling
960	RELA	0.0118447	0.118438	0.243234	1.76995e-08	-0.26137	0.702199	1.31104e-10	0.379808	6433	0.364295	0.0402323	0.594616	0.000444719	-0.153245	-0.186752	0.000722409	0.193478	Buffering	Buffering	Buffering	Scaling
961	RELB	0.0290421	0.241223	0.206005	0.00129501	-0.292371	0.335783	3.32846e-05	0.533594	6434	0.0970108	0.169043	0.580086	0.688234	-0.0507399	-3.26054	0.136234	0.219783	Buffering	Buffering	Buffering	Scaling
962	REXO2	1.44674e-07	0.368466	-1.4272	1.20942e-10	-0.508338	-0.270952	8.24798e-19	0.876804	6447	1.93959e-05	0.349046	0.230879	9.74278e-06	-0.387604	-0.248277	3.08803e-10	0.73665	Scaling	Scaling	Scaling	Scaling
963	RFC1	9.11772e-05	0.318155	1.21596	3.05723e-23	-0.483825	-0.288284	5.34713e-14	0.80198	6449	0.0218639	0.188502	0.226164	0.0608455	-0.0887956	-0.907824	0.00192829	0.277297	Buffering	Buffering	Scaling	Scaling
964	RFC5	0.00292407	0.185028	-0.402526	1.66925e-17	-0.621026	-0.146807	2.03679e-20	0.806054	6453	0.695951	-0.0313225	2.54237	0.0551531	-0.124502	-1.17924	0.290065	0.0931795	Buffering	Buffering	Buffering	Scaling
965	RGL2	3.50035e-08	0.43633	1.26874	5.69103e-09	-0.593259	-0.467787	6.79372e-17	1.02959	6464	0.14902	-0.128901	-2.30083	0.0142261	-0.213935	-0.395548	0.427914	0.0850348	Anti-Scaling	Buffering	Scaling	Scaling
966	RHOF	0.973758	-0.00354268	0.998782	0.100789	-0.147101	0.718805	0.225222	0.143558	6479	0.935911	-0.0130253	-2.37996	0.88564	-0.0161913	-0.623283	0.984304	0.00316603	Buffering	Buffering	Buffering	Buffering
967	RHPN2	0.000815138	0.465976	0.498926	0.000476545	-0.361419	1.34391	2.66044e-07	0.827395	6483	0.0127322	0.34036	1.36122	0.153135	-0.1775	-0.465394	0.00116214	0.51786	Scaling	Buffering	Scaling	Scaling
968	RICTOR	5.79469e-08	0.254276	-0.692143	0.00157246	-0.293894	-0.280848	1.50123e-07	0.54817	6487	0.00551504	0.0943918	0.371039	0.0103716	-0.150917	-0.152536	0.000270936	0.245308	Buffering	Buffering	Scaling	Scaling
969	RIF1	0.013476	0.16076	-0.990981	0.000101895	-0.406056	-0.314551	1.51494e-06	0.566815	6489	0.818752	-0.0145256	2.63374	0.00381272	-0.241741	-0.214191	0.0146336	0.227215	Buffering	Buffering	Buffering	Scaling
970	RING1	2.13911e-11	0.440913	0.596351	7.3947e-08	-0.417222	-0.492187	1.36828e-18	0.858135	6496	0.13407	0.0796068	0.55941	0.102683	-0.102716	-0.582659	0.0155658	0.182322	Buffering	Buffering	Scaling	Scaling
971	RIOK1	1.5934e-17	0.535139	1.06566	4.63103e-08	-0.43093	-0.265537	1.48846e-21	0.966069	6498	0.0999411	0.200555	8.93198	0.00642204	-0.280066	-0.165165	0.00116917	0.480622	Buffering	Scaling	Scaling	Scaling
972	RIPK1	1.99772e-06	0.252785	0.318821	3.75147e-09	-0.355933	-1.54698	1.78602e-17	0.608718	6503	0.274639	0.0577065	1.34687	0.00530972	-0.170858	-0.184236	0.00121145	0.228564	Buffering	Buffering	Scaling	Scaling
973	RNASEH2C	0.0665148	0.145361	1.28946	7.61011e-05	-0.357151	-2.13635	4.9005e-06	0.502512	6524	0.393692	-0.0859978	2.66217	0.105778	-0.137279	-19.2122	0.643829	0.0512813	Buffering	Buffering	Buffering	Scaling
974	RNF121	0.000294229	0.247532	-8.20851	0.000462011	-0.237507	-0.474665	4.03465e-08	0.485039	6530	0.37717	0.086928	1.1146	0.678594	-0.0486584	-2.86092	0.326873	0.135586	Buffering	Buffering	Buffering	Buffering
975	RNF214	3.84607e-10	0.434287	0.637512	6.6338e-05	-0.261174	-0.632214	1.07459e-15	0.69546	6546	0.000999235	0.196031	0.281448	0.107547	-0.0838739	-0.512146	0.000134201	0.279905	Buffering	Buffering	Scaling	Scaling
976	RNF25	0.0741452	0.133742	1.11976	0.00760112	-0.26468	-1.43219	0.000814254	0.398422	6549	0.346381	0.083206	1.45423	0.171092	-0.147586	-0.542769	0.0764127	0.230792	Buffering	Buffering	Buffering	Scaling
977	RNMT	3.82024e-08	0.345574	2.11662	6.07434e-28	-0.462044	-0.219168	5.65516e-25	0.807617	6558	0.000177561	0.341437	0.250653	1.26891e-06	-0.208276	-0.326797	2.33893e-07	0.549713	Scaling	Buffering	Scaling	Scaling
978	RPA3	0.072052	0.151337	-0.603065	2.45478e-07	-0.475757	-0.334756	2.51845e-08	0.627094	6573	0.312793	0.0723006	0.938829	0.957072	0.00370344	3.03728	0.437357	0.0685972	Buffering	Buffering	Buffering	Scaling
979	RPAP3	1.74461e-06	0.34403	-1.39616	0.00211834	-0.294302	-0.597284	6.45652e-09	0.638332	6577	0.0259453	0.116964	0.315221	0.271471	-0.0743612	-2.24828	0.0174705	0.191325	Buffering	Buffering	Scaling	Scaling
980	RPE	0.58683	0.0475181	3.50733	0.00311017	-0.353311	-1.12204	0.00380116	0.400829	6578	0.00101943	0.346533	0.294526	0.00556707	-0.281022	-0.20408	1.46175e-05	0.627555	Scaling	Scaling	Buffering	Scaling
981	RPL10A	0.413951	0.0589374	0.533602	0.0251587	-0.195784	0.781073	0.00603155	0.254721	6584	0.918032	-0.0039965	1.53027	0.723456	0.013841	0.398306	0.683279	-0.0178375	Buffering	Buffering	Buffering	Buffering
982	RPL13A	0.0211634	0.218627	0.266767	2.8891e-08	-0.436801	0.715228	5.19967e-09	0.655428	6588	0.496517	-0.02652	-2.30328	0.643627	0.0222062	0.740502	0.350353	-0.0487262	Buffering	Buffering	Buffering	Scaling
983	RPL18	0.00937563	0.224794	0.608019	1.62817e-17	-0.582638	-0.592602	1.21425e-13	0.807432	6592	0.591212	0.0229811	1.3322	0.503449	0.0448458	1.82181	0.745998	-0.0218647	Buffering	Buffering	Buffering	Scaling
984	RPL28	0.00439375	0.290768	1.38455	1.61893e-12	-0.504077	-0.438068	3.66313e-11	0.794845	6605	0.532627	-0.0299485	1.5822	0.359669	0.0581153	0.542778	0.211878	-0.0880638	Buffering	Buffering	Scaling	Scaling
985	RPL31	0.0118108	0.229798	0.520506	0.0105585	-0.392188	11.7309	0.000335177	0.621986	6609	0.252611	-0.108482	-1.244	0.343279	-0.127162	-1.77651	0.903822	0.0186802	Anti-Scaling	Buffering	Buffering	Scaling
986	RPL37	1.6236e-06	0.294785	0.536435	3.82443e-07	-0.594341	-2.42225	1.30861e-11	0.889127	6617	0.70477	-0.0731764	-3.88476	0.935496	-0.0308384	-7.07678	0.910888	-0.042338	Buffering	Buffering	Scaling	Scaling
987	RPL37A	4.60096e-06	0.452846	0.301136	0.000623845	-0.484408	1.53395	4.59117e-08	0.937254	6618	0.382835	-0.0714965	-5.62885	0.262624	-0.0987273	-1.77813	0.809621	0.0272308	Buffering	Buffering	Scaling	Scaling
988	RPL6	0.000138251	0.261603	0.288714	6.69048e-07	-0.354623	1.5128	1.8991e-12	0.616226	6623	0.724914	0.0132051	0.322859	0.616985	-0.0175288	0.382701	0.491422	0.0307339	Buffering	Buffering	Scaling	Scaling
989	RPL7L1	9.44428e-07	0.262249	-0.370028	7.60953e-08	-0.42049	-0.166919	3.34188e-14	0.682739	6626	0.10668	0.115196	1.26977	0.0382251	-0.108549	-0.144889	0.00315335	0.223745	Buffering	Buffering	Scaling	Scaling
990	RPL9	0.0912734	0.267233	0.585739	1.71259e-12	-0.531436	1.72093	7.83241e-06	0.798669	6628	0.498474	0.0342768	0.326313	0.956791	0.00133354	0.393426	0.51669	0.0329433	Buffering	Buffering	Scaling	Scaling
991	RPLP0	0.0499303	0.1493	0.463795	7.49252e-05	-0.330684	2.02085	1.70046e-06	0.479984	6629	0.912464	0.0034666	0.334301	0.779994	-0.00687669	0.178107	0.759189	0.0103433	Buffering	Buffering	Buffering	Scaling
992	RPP40	3.927e-07	0.365895	-13.8158	3.86413e-07	-0.487674	-0.332075	1.80007e-14	0.853569	6640	0.00156025	0.190978	0.339614	0.845334	0.0154127	-9.42655	0.0459954	0.175565	Buffering	Buffering	Scaling	Scaling
993	RPS10	0.00364944	0.235799	0.370163	6.45201e-08	-0.507646	0.668225	2.94816e-12	0.743445	6644	0.540873	0.0238857	0.459663	0.493305	-0.0349238	3.54829	0.302955	0.0588095	Buffering	Buffering	Buffering	Scaling
994	RPS11	0.00225391	0.270676	0.2039	3.60053e-12	-0.526485	0.645596	6.40864e-13	0.797161	6645	0.190269	-0.0510407	-1.74045	0.915451	-0.00469173	0.751319	0.362477	-0.046349	Buffering	Buffering	Scaling	Scaling
995	RPS16	0.000486325	0.483792	0.547879	7.25069e-09	-0.533422	2.46118	3.4617e-10	1.01721	6651	0.0929825	0.0879591	0.249019	0.665067	0.0287257	0.899916	0.421798	0.0592334	Buffering	Buffering	Scaling	Scaling
996	RPS18	0.0032615	0.262026	0.402536	1.11913e-07	-0.552561	0.731645	5.13809e-12	0.814587	6653	0.943854	-0.00301807	1.39517	0.971861	-0.0022997	2.40668	0.991284	-0.000718377	Buffering	Buffering	Scaling	Scaling
997	RPS19	0.000962353	0.351975	0.319519	2.75972e-15	-0.671689	2.52087	1.27426e-14	1.02366	6654	0.299502	0.0406761	0.231375	0.880126	0.00946743	1.30256	0.640177	0.0312086	Buffering	Buffering	Scaling	Scaling
998	RPS25	1.55309e-08	0.41078	0.613628	9.15417e-12	-0.545909	-0.57309	1.30119e-20	0.956689	6661	0.306817	-0.0805948	-4.34665	0.0418887	-0.147254	-0.804686	0.482018	0.066659	Buffering	Buffering	Scaling	Scaling
999	RPS26	0.00302749	0.304091	69.2109	0.100053	-0.169264	-1.21514	0.000331371	0.473356	6662	0.9525	-0.00440224	-2.81303	0.373032	0.073153	2.21473	0.406422	-0.0775553	Buffering	Buffering	Scaling	Buffering
1000	RPS3	4.02912e-05	0.352128	-26.2039	0.0849361	-0.213982	-1.62529	5.73138e-05	0.56611	6668	0.226299	0.0324593	0.144283	0.179331	-0.043868	5.99545	0.0386156	0.0763273	Buffering	Buffering	Scaling	Buffering
1001	RPS5	0.00306631	0.397282	2.21948	6.17439e-11	-0.598685	-0.579796	2.25729e-10	0.995966	6671	0.513602	-0.0268015	-55.9373	0.844236	-0.0101127	2.31412	0.771549	-0.0166888	Buffering	Buffering	Scaling	Scaling
1002	RPS6	0.00107548	0.29847	0.298376	1.90766e-14	-0.556381	0.940128	1.52809e-17	0.854851	6672	0.715541	-0.0140613	0.488742	0.475098	-0.0210527	0.384694	0.846043	0.00699143	Buffering	Buffering	Scaling	Scaling
1003	RPS6KA4	0.00940903	0.182329	0.801589	0.000324386	-0.264365	-2.19681	4.32465e-07	0.446693	6675	0.186007	-0.0758552	-0.82001	0.66623	-0.0218238	-3.42325	0.420705	-0.0540314	Buffering	Buffering	Buffering	Scaling
1004	RPS6KB2	0.0480238	0.176065	-0.685379	0.0348932	-0.182946	-0.380768	0.000987202	0.359011	6678	0.090313	0.118723	0.829686	0.633364	0.0397348	5.89029	0.421228	0.0789879	Buffering	Buffering	Buffering	Buffering
1005	RPS9	0.0530069	0.178027	0.268866	0.00792101	-0.204835	0.525546	0.000270042	0.382862	6682	0.208243	0.0530194	0.205361	0.241315	0.05373	0.255227	0.989383	-0.000710616	Buffering	Buffering	Buffering	Buffering
1006	RRAGA	2.24924e-09	0.441421	0.221531	2.66486e-27	-0.564153	2.00547	4.73612e-28	1.00557	6688	0.928066	-0.00507678	-1.61663	0.982989	-0.0010729	-2.2823	0.938887	-0.00400388	Buffering	Buffering	Scaling	Scaling
1007	RRAS	0.258995	-0.133667	0.853007	0.00137111	-0.270481	0.823169	0.264068	0.136814	6691	0.339225	-0.110446	2.39987	0.00550164	-0.279632	-1.0117	0.176205	0.169186	Anti-Scaling	Scaling	Anti-Scaling	Scaling
1008	RREB1	0.00192834	0.146192	-0.457089	0.00308119	-0.157093	-0.150701	6.44178e-07	0.303285	6694	0.0451304	0.131809	0.676205	0.553136	-0.045899	-1.28413	0.0558335	0.177708	Buffering	Buffering	Buffering	Buffering
1009	RRP1	1.33224e-05	0.257837	-0.311696	7.86474e-10	-0.261293	-0.135148	8.91282e-14	0.51913	6699	0.404746	-0.068238	-2.42515	0.125449	-0.0926091	-1.52818	0.787531	0.0243712	Buffering	Buffering	Scaling	Scaling
1010	RRP1B	5.95805e-06	0.338924	-0.526333	3.99347e-11	-0.337244	-0.168306	2.07428e-14	0.676168	6702	0.0970312	0.131328	0.456784	0.00246726	-0.145501	-0.36414	0.00202796	0.276828	Buffering	Buffering	Scaling	Scaling
1011	RSF1	2.46895e-06	0.272517	0.453429	0.64469	0.0539994	5.05914	0.0802495	0.218517	6711	0.00109488	0.179742	0.323749	0.779808	0.0294675	-81.6944	0.185847	0.150275	Buffering	Buffering	Scaling	Buffering
1012	RSRC2	0.00277843	0.140371	0.345655	3.81427e-12	-0.427445	-0.555745	4.62915e-16	0.567817	6717	0.449061	0.0445967	0.427786	0.0560205	-0.122742	-1.00282	0.0174248	0.167339	Buffering	Buffering	Buffering	Scaling
1013	RTN2	0.616903	-0.0761056	-2.12259	0.00435248	-0.329539	-1.11649	0.11626	0.253433	6727	0.770635	0.0414088	1.36743	0.311576	-0.153579	-2.33654	0.25797	0.194988	Buffering	Buffering	Buffering	Scaling
1014	RTN3	0.00289312	0.147115	0.221551	3.31594e-08	-0.288198	0.682747	2.3754e-11	0.435313	6728	0.238514	0.0775017	0.810911	0.00818794	-0.132765	-0.215076	0.00298679	0.210267	Buffering	Buffering	Buffering	Scaling
1015	RUNX1	0.0427899	-0.338911	-0.83092	4.99742e-08	-0.703836	-0.744949	0.0493817	0.364925	6737	0.629998	-0.0667812	26.0004	0.594031	-0.0554951	10.574	0.941865	-0.0112861	Buffering	Buffering	Anti-Scaling	Scaling
1016	RUVBL2	0.319901	0.0753174	-0.423145	5.08847e-16	-0.472865	-0.16354	2.94718e-09	0.548182	6740	0.883677	0.00785595	0.26903	0.0231687	-0.119568	-1.65202	0.0281678	0.127424	Buffering	Buffering	Buffering	Scaling
1017	RXRB	1.59602e-11	0.476924	2.39502	2.40778e-07	-0.450073	-0.305648	8.81745e-18	0.926996	6744	0.000802625	0.192383	0.306139	0.0494132	-0.10359	-0.244196	3.84491e-05	0.295973	Buffering	Buffering	Scaling	Scaling
1018	S100B	0.678045	-0.0627201	-0.320794	0.165364	-0.175624	-0.43243	0.496964	0.112904	6760	0.439433	0.166491	0.888188	0.177264	-0.321337	-9.02039	0.0813352	0.487828	Buffering	Scaling	Buffering	Buffering
1019	S100P	0.924721	-0.0168438	-0.176084	0.0357941	-0.267499	-0.312793	0.145635	0.250655	6761	0.599846	-0.152611	-0.693789	0.430599	0.173539	-2.187	0.275069	-0.32615	Anti-Scaling	Anti-Scaling	Buffering	Scaling
1020	SAE1	0.00259904	0.286148	-0.518813	1.15949e-19	-0.692101	-0.172441	1.10965e-15	0.978249	6768	0.0865355	0.174242	0.76781	0.00455834	-0.193155	-0.322993	0.00193237	0.367397	Buffering	Buffering	Scaling	Scaling
1021	SAMD4B	0.0027057	0.361612	1.16458	0.00247483	-0.220877	-2.60835	1.28836e-05	0.582489	6775	0.0419645	0.152717	0.452443	0.592009	-0.06399	-3.06856	0.097549	0.216708	Buffering	Buffering	Scaling	Buffering
1022	SAP130	0.00502963	0.176523	-2.18423	0.000762226	-0.327722	-0.373009	7.18726e-06	0.504244	6781	0.30035	0.15849	1.06538	0.0263885	-0.162415	-0.298097	0.0592421	0.320906	Buffering	Buffering	Buffering	Scaling
1023	SARS2	0.00119227	0.408815	3.56561	0.0368582	-0.169744	-0.936067	2.6361e-05	0.57856	6793	0.459624	0.100898	12.8639	0.328029	-0.127923	-0.857366	0.130396	0.228821	Buffering	Buffering	Scaling	Buffering
1024	SART1	0.0306778	0.167447	-2.18453	0.0426412	-0.159508	-0.666627	0.000653496	0.326956	6794	0.0259211	0.103699	0.393997	0.990437	0.00052599	24.4918	0.0825092	0.103173	Buffering	Buffering	Buffering	Buffering
1025	SART3	8.39176e-06	0.197012	0.327412	3.53484e-10	-0.363508	-0.557174	3.80213e-16	0.56052	6795	0.000479048	0.175959	0.163389	1.5855e-08	-0.294908	-0.111735	3.89819e-11	0.470867	Buffering	Scaling	Buffering	Scaling
1026	SBNO1	2.42135e-05	0.254152	0.52224	5.16342e-08	-0.414756	-0.752343	6.39429e-14	0.668908	6805	0.625201	0.022491	0.508141	0.0137814	-0.173876	-0.552531	0.00910413	0.196367	Buffering	Buffering	Scaling	Scaling
1027	SCAF1	0.0937193	0.125794	1.58189	0.00294568	-0.162295	-1.11785	0.000599702	0.288089	6808	0.320961	0.0671659	0.289414	0.0101036	-0.186413	-0.814314	0.00370914	0.253579	Buffering	Buffering	Buffering	Buffering
1028	SCGB2A1	0.980878	0.00409409	0.232478	3.24253e-05	-0.852452	0.3325	0.000434004	0.856546	6829	0.980009	-0.00737058	839.901	0.0593116	-0.557568	-1.73583	0.143324	0.550197	Buffering	Scaling	Buffering	Scaling
1029	SCIN	0.788697	-0.0296317	0.27675	0.0235481	-0.246856	0.270808	0.0867582	0.217224	6830	0.0208343	-0.166081	-0.402497	0.00114137	-0.261203	-0.36165	0.212284	0.0951216	Anti-Scaling	Scaling	Buffering	Buffering
1030	SCLY	0.333783	0.0839841	-0.494033	0.000267561	-0.337323	-0.162251	0.000306621	0.421307	6831	0.859364	0.0232252	-12.9479	0.223346	-0.153331	-0.719114	0.296203	0.176556	Buffering	Buffering	Buffering	Scaling
1031	SCRN1	4.08753e-05	0.370228	-2.51219	4.30388e-07	-0.461033	-0.403599	3.86323e-13	0.83126	6841	0.147115	0.0984108	0.659302	0.117888	-0.115317	-0.923829	0.0149937	0.213728	Buffering	Buffering	Scaling	Scaling
1032	SCYL1	0.000160117	0.228545	-0.591213	0.00183996	-0.18133	-0.226211	3.70018e-08	0.409875	6845	0.0354544	0.140329	0.559222	0.0853951	-0.114023	-0.634739	0.00368929	0.254352	Buffering	Buffering	Buffering	Buffering
1033	SCYL2	0.000159171	0.238058	0.451609	1.09415e-11	-0.469484	-0.711994	1.76e-16	0.707542	6846	0.296062	0.053908	0.417516	0.0027673	-0.156452	-0.410836	0.00152464	0.21036	Buffering	Buffering	Buffering	Scaling
1034	SDHA	1.44e-13	0.427899	-0.29016	0.000124721	-0.345774	-0.108062	1.06101e-12	0.773673	6860	0.000479971	0.185332	0.695889	0.048706	-0.130146	-0.164213	9.5202e-05	0.315478	Buffering	Buffering	Scaling	Scaling
1035	SDHD	7.45786e-05	0.347886	0.603248	1.10397e-12	-0.549103	-1.56059	2.28167e-16	0.896989	6866	0.414009	0.0788524	0.906932	0.340942	-0.106886	-2.21254	0.168008	0.185739	Buffering	Buffering	Scaling	Scaling
1036	SDSL	0.0462503	0.173705	0.522884	9.86846e-06	-0.395877	2.17069	1.80372e-07	0.569583	6870	0.409859	0.0959533	2.70089	0.43426	-0.0797471	-1.932	0.198521	0.1757	Buffering	Buffering	Buffering	Scaling
1037	SEH1L	1.5845e-08	0.366221	0.635952	7.01908e-28	-0.479603	-0.335576	2.25679e-25	0.845823	6893	0.463754	0.0275787	0.311467	0.0412365	-0.0656672	-1.25207	0.0315475	0.0932459	Buffering	Buffering	Scaling	Scaling
1038	SEPTIN10	0.784129	0.0234053	-1.15284	0.0319898	-0.269997	-0.693182	0.0421879	0.293403	6927	0.0583382	0.184798	0.46772	0.00207654	-0.158879	-0.10788	0.00199127	0.343677	Buffering	Buffering	Buffering	Scaling
1039	SEPTIN2	0.000914846	0.301404	0.734582	0.00981667	-0.29124	-2.82894	2.43205e-05	0.592644	6929	0.654177	-0.0300529	1.26086	0.685106	-0.0313221	1.50143	0.989378	0.00126921	Buffering	Buffering	Scaling	Scaling
1040	SEPTIN7	3.67371e-05	0.251006	-0.703013	0.000757428	-0.227162	-0.328375	3.16296e-09	0.478168	6934	0.595192	0.0238845	0.206595	0.304186	-0.0535128	0.78833	0.168776	0.0773973	Buffering	Buffering	Scaling	Buffering
1041	SERPINB1	0.454448	0.0880445	2.76139	6.77454e-06	-0.541766	-1.54299	7.16648e-06	0.62981	6949	0.34645	0.0738966	1.40634	0.00537958	-0.262754	-0.298482	0.00111043	0.336651	Buffering	Scaling	Buffering	Scaling
1042	SERPINB6	0.0787086	0.139206	-0.71644	0.0033361	-0.242324	-0.214851	2.52215e-05	0.38153	6955	0.14743	0.135991	2.04159	0.694062	-0.0409491	-0.92607	0.108685	0.17694	Buffering	Buffering	Buffering	Buffering
1043	SERPINB9	0.0223492	0.209271	-0.706633	0.134869	-0.147333	-0.288444	0.00216424	0.356604	6957	0.154056	0.134046	1.53241	0.584614	0.0567327	3.05773	0.52148	0.0773133	Buffering	Buffering	Buffering	Buffering
1044	SERPINE2	0.960126	-0.0103821	-0.480103	0.324896	-0.253696	-0.400839	0.433594	0.243314	6961	0.423019	0.251036	6.65114	0.0772368	-0.409181	-0.813493	0.0705765	0.660218	Scaling	Scaling	Buffering	Scaling
1045	SERPING1	0.805502	0.0201827	0.10421	0.19834	-0.105667	0.0995453	0.191535	0.12585	6964	0.516936	-0.0592402	3.50039	0.717988	-0.0458488	5.12968	0.922006	-0.0133914	Buffering	Buffering	Buffering	Buffering
1046	SERPINH1	0.0105743	0.183513	-161.969	0.418634	0.0873147	-7.41664	0.41666	0.0961986	6965	0.146353	0.155021	6.3328	0.403345	0.0717456	-1.84013	0.471893	0.083275	Buffering	Buffering	Buffering	Buffering
1047	SF1	0.608625	-0.0381552	-0.75801	0.0516426	-0.139616	-0.486483	0.232903	0.101461	6979	0.161296	0.0522709	0.298522	0.537788	-0.0350629	-2.1896	0.143761	0.0873338	Buffering	Buffering	Buffering	Buffering
1048	SF3B1	0.000485295	0.201278	0.42422	0.00605841	-0.213331	-2.02817	1.36393e-05	0.414609	6983	0.434447	0.0316674	0.252322	0.0305253	-0.0671995	-0.202629	0.0339075	0.0988669	Buffering	Buffering	Buffering	Buffering
1049	SF3B2	0.0455131	0.117611	-0.71938	0.00802647	-0.14518	-0.271094	0.00014729	0.262791	6984	0.0615694	0.0804283	0.285003	0.880527	0.00609224	0.62685	0.149713	0.0743361	Buffering	Buffering	Buffering	Buffering
1050	SFRP4	0.209421	0.318625	0.8344	0.00278061	0.784722	0.753552	0.122504	-0.466097	6993	0.690607	0.0775849	-4.57681	0.259507	0.275587	10.2281	0.455643	-0.198003	Buffering	Anti-Scaling	Scaling	Anti-Scaling
1051	SHMT2	0.0122299	0.223861	-1.69257	1.88919e-11	-0.5664	-0.274578	2.91488e-12	0.790261	7036	0.00735392	0.265996	0.9243	0.0888169	-0.170178	-0.619537	0.000771686	0.436174	Scaling	Buffering	Buffering	Scaling
1052	SIAE	0.227122	0.126345	0.976776	2.65158e-06	-0.513715	-15.3602	8.19444e-07	0.64006	7043	0.488974	0.0979899	4.29053	6.37709e-05	-0.492685	-0.337737	0.000540031	0.590675	Buffering	Scaling	Buffering	Scaling
1053	SIDT2	0.000107837	0.283711	0.45416	0.000551411	-0.220255	1.12929	1.20387e-08	0.503966	7044	0.77389	0.0424211	1.46607	0.0357452	-0.287353	-1.31838	0.0740533	0.329774	Buffering	Scaling	Scaling	Buffering
1054	SIPA1	0.0316928	0.193193	0.458895	0.00363597	-0.277414	1.01043	2.53383e-05	0.470607	7056	0.784098	-0.0240198	-6.23559	0.191928	-0.112412	-0.977948	0.437741	0.0883919	Buffering	Buffering	Buffering	Scaling
1055	SIPA1L3	0.000181963	0.380196	0.234836	8.72667e-05	-0.352738	0.773218	3.55923e-09	0.732934	7058	0.998877	-0.000124384	-3.06857	0.0766953	-0.191095	-0.627118	0.127774	0.190971	Buffering	Buffering	Scaling	Scaling
1056	SIRT2	0.000333777	0.309997	0.394114	2.41112e-05	-0.256878	3.30332	9.57036e-09	0.566875	7061	0.861317	0.0131642	0.45123	0.0121805	-0.203062	-0.630036	0.0144942	0.216226	Buffering	Buffering	Scaling	Scaling
1057	SIRT5	0.000101876	0.234173	0.295221	1.38171e-06	-0.415923	1.42897	3.16491e-11	0.650096	7063	0.0823744	0.148051	5.29293	0.173678	-0.127881	-0.407517	0.0169261	0.275932	Buffering	Buffering	Buffering	Scaling
1058	SKAP2	0.00652997	0.349789	4.73192	0.385014	-0.102857	-2.66799	0.00201542	0.452646	7068	0.609112	0.0582124	1.09255	0.530728	-0.0618034	-4.52648	0.265801	0.120016	Buffering	Buffering	Scaling	Buffering
1059	SKIV2L	7.60867e-09	0.358052	-0.394615	1.38637e-07	-0.401935	-0.131306	2.11523e-16	0.759987	7070	0.862027	0.00827472	0.681912	0.100119	-0.0904774	-0.643791	0.0891543	0.0987522	Buffering	Buffering	Scaling	Scaling
1060	SLAIN2	0.000684589	0.231027	0.179084	6.11776e-25	-0.483432	-1.25469	7.28042e-15	0.714459	7074	0.460797	0.0504339	0.210064	0.000876877	-0.203953	-0.70783	0.000746202	0.254387	Buffering	Buffering	Buffering	Scaling
1061	SLC11A2	0.000280686	0.3005	0.62799	3.60864e-10	-0.528299	-1.13955	2.77622e-14	0.828799	7076	0.105579	0.101726	0.489608	0.551488	0.0930017	6.44522	0.95435	0.00872469	Buffering	Buffering	Scaling	Scaling
1062	SLC12A7	1.3186e-08	0.294146	0.792582	0.0107778	-0.182785	-1.46319	1.16944e-08	0.476932	7080	0.0320614	0.122521	1.90671	0.000406842	-0.251772	-0.0896771	7.50335e-06	0.374292	Buffering	Scaling	Scaling	Buffering
1063	SLC1A5	0.116132	0.201115	-0.443676	7.15007e-05	-0.285243	-0.130997	0.000335192	0.486358	7090	0.00093365	0.369509	0.370774	0.84174	-0.022618	-2.47234	0.00352404	0.392127	Scaling	Buffering	Buffering	Scaling
1064	SLC25A12	0.00285764	0.183213	-2.14837	0.0304498	-0.262152	-0.737847	0.000908285	0.445366	7097	0.0188054	0.204755	0.396561	0.14222	-0.131289	-0.428129	0.00511273	0.336044	Buffering	Buffering	Buffering	Scaling
1065	SLC25A3	1.48256e-05	0.237403	0.406633	7.53639e-11	-0.397816	-0.597716	1.16036e-16	0.635219	7111	0.00209226	0.209735	0.250758	9.04358e-06	-0.333993	-0.254526	1.53059e-08	0.543728	Buffering	Scaling	Buffering	Scaling
1066	SLC29A1	6.39932e-10	0.459256	-20.1636	0.00134947	-0.277334	-0.349784	3.16336e-12	0.736591	7130	0.151636	0.229359	1.73812	9.15171e-08	-0.701511	-0.144743	5.18935e-07	0.93087	Buffering	Scaling	Scaling	Scaling
1067	SLC30A9	0.000164868	0.367237	0.233133	7.08158e-24	-0.626508	-2.26645	1.66645e-14	0.993745	7141	0.139339	0.169053	0.378794	9.20652e-06	-0.264147	-0.579789	0.00138754	0.433199	Buffering	Scaling	Scaling	Scaling
1068	SLC34A2	0.562541	-0.125002	0.275675	0.0109588	-0.282626	0.266816	0.46363	0.157623	7144	0.373882	-0.136897	-1.00797	0.00107083	-0.425686	-0.905986	0.072557	0.288788	Anti-Scaling	Scaling	Anti-Scaling	Scaling
1069	SLC35B2	4.96414e-10	0.365254	2.61853	4.53298e-06	-0.35305	-0.304881	4.62953e-15	0.718304	7149	0.00234354	0.170009	0.30548	0.0197021	-0.162916	-0.208918	2.86525e-05	0.332925	Buffering	Buffering	Scaling	Scaling
1070	SLC37A4	9.04214e-06	0.288433	-1.3133	9.78292e-08	-0.383657	-0.301546	7.37712e-14	0.672089	7155	0.596136	0.0453643	0.944558	0.304707	-0.110623	-3.80487	0.211823	0.155988	Buffering	Buffering	Scaling	Scaling
1071	SLC38A1	0.321668	0.102282	0.993734	0.00248094	-0.410883	10.1963	0.00120788	0.513165	7156	0.509961	0.092435	18.2205	0.250004	0.200088	3.13246	0.588591	-0.107653	Buffering	Anti-Scaling	Buffering	Scaling
1072	SLC38A2	0.0833129	0.141733	2.40927	0.0634963	-0.206865	-3.27264	0.00515951	0.348598	7158	0.654929	-0.0554127	-2.48171	0.347109	0.119232	1.39501	0.228911	-0.174645	Buffering	Anti-Scaling	Buffering	Buffering
1073	SLC39A10	0.0066818	0.306585	0.826266	0.0538749	-0.32134	13.4966	0.00138518	0.627925	7159	0.040688	0.35394	0.754045	0.553764	-0.102716	-2.14467	0.0515572	0.456656	Scaling	Buffering	Scaling	Scaling
1074	SLC39A7	0.000107099	0.366295	4.33342	0.000381695	-0.381321	-0.586222	1.23775e-09	0.747617	7163	0.100476	0.156166	1.20799	0.0091566	-0.332428	-0.491364	0.000955797	0.488593	Buffering	Scaling	Scaling	Scaling
1075	SLC3A2	0.558323	0.0444297	-0.202482	0.0449621	-0.133173	-0.111049	0.033566	0.177602	7164	0.994608	0.000589967	2.28207	0.0143186	-0.20645	-0.610346	0.0458345	0.20704	Buffering	Buffering	Buffering	Buffering
1076	SLC44A4	0.247431	-0.169406	0.766677	0.0697208	-0.375986	1.01472	0.348201	0.20658	7170	0.0625739	-0.293127	-1.26981	0.0129771	-0.527164	-0.723311	0.268021	0.234037	Anti-Scaling	Scaling	Anti-Scaling	Scaling
1077	SLC5A3	0.00276376	0.44786	0.84182	1.33797e-06	-0.39572	1.93408	3.83378e-07	0.84358	7181	0.418123	0.145325	3.90147	0.02998	-0.231683	-0.533666	0.0508073	0.377008	Buffering	Buffering	Scaling	Scaling
1078	SMARCA2	0.0774631	0.179197	0.407449	1.4929e-13	-0.585595	1.01979	3.95606e-12	0.764792	7215	0.0404327	0.107575	0.28744	0.152023	-0.0560201	-4.65634	0.0012045	0.163595	Buffering	Buffering	Buffering	Scaling
1079	SMARCC2	0.0012593	0.152079	0.173441	0.00165823	-0.217864	1.07748	1.72541e-06	0.369942	7222	0.0106981	0.150749	0.328441	0.0162792	-0.119397	-0.417737	0.000153207	0.270146	Buffering	Buffering	Buffering	Buffering
1080	SMARCD1	1.77385e-05	0.26025	5.3851	4.89696e-10	-0.304712	-0.187796	2.05304e-14	0.564961	7223	0.403958	0.111572	4.71568	0.846477	-0.0161223	-2.34559	0.384881	0.127694	Buffering	Buffering	Scaling	Scaling
1081	SMCHD1	6.14946e-08	0.446617	5.70082	3.03966e-18	-0.436527	-0.300827	1.41809e-19	0.883144	7233	0.0018196	0.244967	0.292085	0.00197091	-0.14778	-0.608803	1.07695e-05	0.392747	Buffering	Buffering	Scaling	Scaling
1082	SMPD4	0.000519785	0.272492	-0.604832	0.000164536	-0.374177	-0.197999	1.35147e-07	0.646669	7250	0.0837214	0.111947	0.393529	0.68213	-0.0211102	-1.21966	0.0925628	0.133057	Buffering	Buffering	Scaling	Scaling
1083	SMU1	5.80665e-08	0.308489	0.245451	7.71279e-19	-0.369257	-1.35918	5.70319e-24	0.677745	7254	0.114477	0.0678068	0.239024	0.0993446	-0.0568368	-5.80525	0.00239808	0.124644	Buffering	Buffering	Scaling	Scaling
1084	SMUG1	0.000802737	0.259197	1.02185	7.13184e-06	-0.321715	-0.902679	1.86882e-09	0.580912	7255	8.57454e-05	0.28177	0.182379	0.690245	0.0360808	16.5105	0.0147526	0.24569	Scaling	Buffering	Scaling	Scaling
1085	SNRPA	0.898392	0.00773865	-0.175409	0.340929	-0.0501559	-0.229225	0.418927	0.0578946	7276	0.423827	0.0437736	0.380807	0.410019	0.0516288	0.51025	0.910575	-0.00785517	Buffering	Buffering	Buffering	Buffering
1086	SNRPC	3.11398e-16	0.428459	0.891289	1.83887e-10	-0.505787	-0.248787	1.05943e-21	0.934246	7280	0.348014	0.053514	3.28489	0.011242	0.140992	0.261853	0.189631	-0.0874783	Buffering	Anti-Scaling	Scaling	Scaling
1087	SNRPD2	5.50755e-06	0.378487	0.188387	6.75999e-16	-0.520454	0.941635	7.42948e-18	0.898941	7282	0.962808	-0.00269169	1.62524	0.363723	0.0441259	0.35934	0.460387	-0.0468175	Buffering	Buffering	Scaling	Scaling
1088	SNRPF	3.81167e-05	0.26433	-0.807225	5.4709e-13	-0.629486	-0.275515	2.00572e-18	0.893816	7285	0.723743	-0.0265057	1.19706	0.0307869	-0.199151	-1.63179	0.106741	0.172646	Buffering	Buffering	Scaling	Scaling
1089	SNX15	0.00106685	0.157837	-0.703265	0.189603	-0.0643022	-0.310411	0.000170969	0.222139	7296	0.308612	0.0989504	1.26567	0.28817	-0.0688765	-1.57569	0.124816	0.167827	Buffering	Buffering	Buffering	Buffering
1090	SNX8	0.0262082	0.181928	1.19583	0.000139829	-0.318214	-1.65084	4.44618e-07	0.500142	7312	0.186527	0.0777261	0.330359	0.000980375	-0.226917	-0.525864	0.000155555	0.304643	Buffering	Buffering	Buffering	Scaling
1091	SOD1	0.00274144	0.278411	1.75692	1.02794e-19	-0.601767	-0.434917	4.3773e-14	0.880177	7315	0.60909	0.0686612	1.78288	3.58705e-05	-0.303129	-0.431833	0.0140125	0.37179	Buffering	Scaling	Scaling	Scaling
1092	SOD3	0.724004	0.0858182	183.576	0.00011345	-0.455471	-2.09336	0.028739	0.541289	7317	0.79061	-0.0671745	-3.461	0.271416	-0.12695	-1.30371	0.812848	0.0597758	Buffering	Buffering	Buffering	Scaling
1093	SON	0.00259319	0.211721	8.0003	8.91794e-10	-0.316844	-0.403862	3.20125e-10	0.528565	7319	2.39671e-05	0.183011	0.0670476	0.0802476	-0.0567633	-0.45311	8.66536e-07	0.239774	Buffering	Buffering	Buffering	Scaling
1094	SORL1	0.000396744	0.496471	0.493491	3.53106e-05	-0.538235	0.672452	2.09891e-09	1.03471	7325	0.155849	0.18271	1.92389	0.00318684	-0.312397	-0.427982	0.00122576	0.495106	Buffering	Scaling	Scaling	Scaling
1095	SP1	0.0162165	0.189284	0.294956	4.3325e-06	-0.320968	0.332886	9.93083e-08	0.510252	7334	0.0486873	0.165237	0.594764	0.0986383	-0.146841	-0.771222	0.00278387	0.312078	Buffering	Buffering	Buffering	Scaling
1096	SP100	0.650783	0.0263241	0.208529	0.0406395	-0.133075	0.178918	0.0476664	0.159399	7335	0.616304	-0.0520497	-4.55869	0.304285	-0.11115	-1.24303	0.671577	0.0591005	Buffering	Buffering	Buffering	Buffering
1097	SP110	0.520136	-0.0838773	0.584168	0.146016	-0.223154	0.502495	0.459308	0.139276	7336	0.884456	-0.0178131	1.30967	0.5584	0.0600971	0.405512	0.585767	-0.0779101	Buffering	Buffering	Buffering	Buffering
1098	SP3	0.000578788	0.231593	0.210357	0.00414977	-0.211842	0.261585	4.66134e-06	0.443434	7339	0.841015	-0.0136217	-2.86834	0.0764021	-0.113191	-0.232807	0.197684	0.0995689	Buffering	Buffering	Buffering	Buffering
1099	SPATS2	3.67652e-06	0.406383	-1.15547	5.06444e-06	-0.385993	-0.28895	1.00537e-12	0.792376	7353	0.0169765	0.161753	0.311587	0.16376	-0.180227	-1.12536	0.0113541	0.34198	Buffering	Buffering	Scaling	Scaling
1100	SPCS2	8.05256e-09	0.351258	0.333403	0.00148072	-0.31829	-6.62596	5.41035e-09	0.669548	7358	0.0400585	0.114079	0.256784	0.955409	-0.00330188	1.45004	0.0574417	0.117381	Buffering	Buffering	Scaling	Scaling
1101	SPINT2	0.000290083	0.43972	0.171705	3.19888e-10	-0.638153	0.339856	2.06253e-12	1.07787	7374	0.101211	0.241888	2.65715	0.185051	-0.289061	-1.13439	0.021157	0.53095	Buffering	Scaling	Scaling	Scaling
1102	SPTBN2	0.000585922	0.317378	-7.39516	0.00518898	-0.192856	-0.367326	5.65421e-07	0.510234	7393	0.236527	0.0979401	1.34548	0.00277782	-0.209331	-0.29516	0.00191432	0.307271	Buffering	Buffering	Scaling	Buffering
1103	SRGAP1	0.0526007	0.225194	1.21135	0.000137559	-0.429714	-7.68368	3.80926e-06	0.654909	7410	0.737858	0.0247632	4.55055	0.0346962	-0.135998	-0.445818	0.0684217	0.160761	Buffering	Buffering	Buffering	Scaling
1104	SRPK1	3.74716e-06	0.30141	-0.51011	6.97637e-12	-0.505265	-0.104415	2.55321e-19	0.806675	7421	0.702758	0.0274775	0.96597	0.000748876	-0.237729	-0.167073	0.000983385	0.265207	Buffering	Buffering	Scaling	Scaling
1105	SSB	1.20992e-05	0.283032	-0.608444	0.00137016	-0.392892	-0.378917	1.71866e-06	0.675924	7446	0.01731	0.184046	0.291718	4.19463e-06	-0.322313	-0.0609415	2.351e-06	0.506359	Buffering	Scaling	Scaling	Scaling
1106	SSH3	3.5172e-05	0.321712	0.397564	1.079e-06	-0.393368	2.8541	2.54069e-12	0.71508	7453	0.0193574	0.166526	0.707352	0.322648	-0.112067	-1.35821	0.0274839	0.278593	Buffering	Buffering	Scaling	Scaling
1107	SSR1	1.13674e-11	0.512847	0.862953	7.84907e-09	-0.665874	-0.524817	7.42812e-18	1.17872	7455	0.10083	0.0887157	0.542411	2.08652e-06	-0.342356	-0.106291	1.26024e-07	0.431072	Buffering	Scaling	Scaling	Scaling
1108	SSRP1	0.882806	0.00950197	-0.331616	0.081824	-0.110368	-0.247658	0.128428	0.11987	7459	0.724273	-0.0284081	-1.72172	0.745546	0.0225566	-3.21128	0.593094	-0.0509648	Buffering	Buffering	Buffering	Buffering
1109	SSSCA1	0.000252994	0.255623	0.927787	2.87252e-08	-0.363324	-0.670882	3.7048e-12	0.618947	7460	0.0373574	0.17587	1.13464	0.113437	-0.12419	-0.538155	0.00549427	0.30006	Buffering	Buffering	Scaling	Scaling
1110	ST14	0.0182426	0.204429	0.198146	5.73652e-07	-0.551434	0.409968	1.00425e-08	0.755863	7464	0.185156	0.121417	2.40804	0.0317489	-0.167701	-0.382403	0.00856213	0.289118	Buffering	Buffering	Buffering	Scaling
1111	STAM2	0.319869	0.064434	0.311933	0.0523677	-0.244306	1.68145	0.022475	0.30874	7475	0.908287	-0.00935865	1.37139	0.118897	-0.0993302	-1.05487	0.358255	0.0899716	Buffering	Buffering	Buffering	Buffering
1112	STARD10	0.00140249	0.331483	-0.831477	5.79165e-05	-0.438585	-0.405966	1.41068e-08	0.770068	7478	0.786061	-0.0352603	-6.77668	0.231225	-0.215986	-2.29991	0.373819	0.180726	Buffering	Buffering	Scaling	Scaling
1113	STARD7	0.0435981	0.147047	0.632332	0.0821696	-0.199252	9.15629	0.00891378	0.346299	7483	0.0668741	0.140182	0.318106	0.78623	-0.0421706	-6.37678	0.283474	0.182353	Buffering	Buffering	Buffering	Buffering
1114	STAT1	0.406322	-0.119512	0.638506	0.798119	-0.0514402	0.71844	0.770431	-0.0680716	7484	0.464212	-0.086884	-0.820485	0.178798	0.284693	1.94315	0.106214	-0.371577	Buffering	Anti-Scaling	Anti-Scaling	Buffering
1115	STAT2	0.00229425	0.219805	0.267776	0.00525375	-0.203121	0.438353	5.35167e-06	0.422926	7485	0.454252	0.0562343	2.49455	0.802972	-0.0192802	-3.32955	0.444046	0.0755144	Buffering	Buffering	Buffering	Buffering
1116	STAT6	0.00480962	0.314271	0.590332	0.00382426	-0.333291	1.3754	9.78489e-06	0.647562	7489	0.148163	0.100731	1.52632	0.230868	-0.0867451	-0.661336	0.0392566	0.187476	Buffering	Buffering	Scaling	Scaling
1117	STIP1	0.00119452	0.195225	-0.144174	0.0323669	-0.122511	-0.0958556	8.65211e-06	0.317736	7500	0.488189	0.0396152	0.717072	0.0014329	-0.185332	-0.317179	0.00226453	0.224947	Buffering	Buffering	Buffering	Buffering
1118	STK25	0.0004831	0.315469	1.2956	2.93079e-05	-0.361083	-0.37762	1.77189e-08	0.676552	7507	0.290855	-0.0660916	-1.18316	0.496731	0.0323973	0.302126	0.176196	-0.0984888	Buffering	Buffering	Scaling	Scaling
1119	STK38	7.65943e-10	0.446346	0.731007	9.09355e-05	-0.409287	-0.878381	2.02941e-12	0.855633	7512	0.294239	0.0507682	0.756249	0.454854	-0.0721675	-1.75452	0.227783	0.122936	Buffering	Buffering	Scaling	Scaling
1120	STK39	0.502263	0.0970918	-0.827232	0.0476107	-0.254263	-0.252192	0.0490978	0.351354	7514	0.863012	-0.0183065	-259.965	0.774394	-0.021255	-12.1241	0.979695	0.00294847	Buffering	Buffering	Buffering	Scaling
1121	STOML2	3.08455e-05	0.267946	-2.03398	4.61242e-29	-0.550291	-0.166221	2.08703e-25	0.818237	7519	0.000590981	0.254033	0.279051	4.01366e-13	-0.395873	-0.195227	4.49149e-12	0.649906	Scaling	Scaling	Scaling	Scaling
1122	STRN4	0.00105144	0.234273	0.287872	1.32909e-05	-0.229975	1.1361	3.43109e-08	0.464247	7529	0.104008	0.0983037	0.257438	0.0947041	-0.099846	-27.4176	0.0116958	0.19815	Buffering	Buffering	Buffering	Buffering
1123	STT3A	4.26333e-06	0.318691	0.380117	5.9489e-09	-0.391542	-21.9945	2.57847e-15	0.710233	7531	0.0166552	0.137394	0.256357	0.742736	0.0144193	0.258991	0.0433571	0.122975	Buffering	Buffering	Scaling	Scaling
1124	STX18	0.0196485	0.333529	0.431944	1.33207e-05	-0.356015	1.60955	1.21018e-05	0.689544	7539	0.793669	-0.0189205	0.538131	0.0360588	-0.119146	-3.34494	0.188093	0.100226	Buffering	Buffering	Scaling	Scaling
1125	STX3	0.637567	0.0316154	2.308	0.000679296	-0.292843	-2.0211	0.00106949	0.324459	7542	0.0328694	0.11143	0.199025	0.146186	-0.152346	-1.46077	0.0177591	0.263776	Buffering	Buffering	Buffering	Scaling
1126	STX5	0.000337267	0.177698	0.199158	0.0106303	-0.132251	0.396938	1.06559e-06	0.309949	7544	0.640427	0.0291967	1.19445	0.190961	-0.0561868	-1.17356	0.207544	0.0853835	Buffering	Buffering	Buffering	Buffering
1127	SUB1	6.21361e-19	0.475509	7.112	3.98161e-05	-0.383892	-0.284025	1.38024e-13	0.8594	7553	3.25607e-06	0.308856	0.583896	0.00327245	-0.288088	-0.185919	1.74567e-06	0.596944	Scaling	Scaling	Scaling	Scaling
1128	SUDS3	7.16384e-06	0.252432	0.146221	3.51847e-16	-0.622565	1.80771	1.11164e-22	0.874997	7558	0.580561	0.0363531	0.414344	0.00822975	-0.118525	1.45537	0.024149	0.154878	Buffering	Buffering	Scaling	Scaling
1129	SUMF2	1.52684e-05	0.258097	1.41237	3.38816e-10	-0.400577	-0.379171	2.56491e-16	0.658674	7571	0.0138693	0.206815	0.542763	0.00160753	-0.231651	-0.371016	2.3094e-05	0.438465	Buffering	Buffering	Scaling	Scaling
1130	SUMO1	0.00232913	0.196196	0.19708	0.00479182	-0.30781	0.783123	5.15627e-05	0.504006	7572	0.358744	0.131599	2.42932	0.000598378	-0.339502	-0.14714	0.00656909	0.471101	Buffering	Scaling	Buffering	Scaling
1131	SUOX	0.00641629	0.171391	0.32888	7.85634e-07	-0.392972	5.52798	1.3447e-09	0.564364	7577	0.360095	0.0844633	1.46818	0.00102428	-0.352989	-0.538569	0.00107082	0.437452	Buffering	Scaling	Buffering	Scaling
1132	SUPT5H	5.927e-05	0.447129	0.707278	0.00350033	-0.203036	-5.94167	1.83664e-07	0.650165	7582	0.0387559	0.163389	0.73047	0.987	0.00158826	-2.47424	0.151299	0.161801	Buffering	Buffering	Scaling	Buffering
1133	SYMPK	0.058584	0.220561	-0.925126	5.87919e-06	-0.373565	-0.346819	7.95902e-06	0.594126	7601	0.238256	0.080066	0.559901	0.161042	0.0706884	0.282765	0.898822	0.00937765	Buffering	Buffering	Buffering	Scaling
1134	SYVN1	0.0073663	0.137926	-1.08545	4.94168e-06	-0.222894	-0.223254	9.89812e-09	0.36082	7620	0.815673	-0.0110543	-8.64745	0.201427	0.0959869	0.916887	0.187887	-0.107041	Buffering	Buffering	Buffering	Buffering
1135	TACC3	0.0534723	0.296667	-0.806369	0.000254544	-0.311264	-0.436829	0.00016125	0.607931	7628	0.418098	0.105816	2.05412	0.369182	0.0770051	6.11606	0.835883	0.0288113	Buffering	Buffering	Scaling	Scaling
1136	TAF6L	0.00172744	0.180389	0.954235	0.0537609	-0.123149	-2.04337	8.00414e-05	0.303537	7643	0.613421	0.0528499	1.72826	0.328906	0.0899944	0.8401	0.766107	-0.0371445	Buffering	Buffering	Buffering	Buffering
1137	TAF8	1.08679e-07	0.269564	1.03575	2.56493e-05	-0.303214	-0.425564	5.37525e-12	0.572779	7645	0.106833	0.180941	2.32009	0.887687	-0.0221448	-1.35995	0.235675	0.203086	Buffering	Buffering	Scaling	Scaling
1138	TAGLN	0.0437481	0.316833	0.77943	0.994444	-0.00104718	0.793382	0.0874585	0.31788	7648	0.545982	0.123193	-2.87547	0.0115917	0.497288	4.01794	0.117116	-0.374095	Buffering	Anti-Scaling	Scaling	Buffering
1139	TANC1	0.000203113	0.3308	0.398701	8.27006e-06	-0.615842	-2.75684	4.51677e-09	0.946642	7652	0.536575	0.0624485	1.61537	0.0669689	-0.129681	-0.277207	0.102004	0.192129	Buffering	Buffering	Scaling	Scaling
1140	TANK	0.962135	0.00525968	1.16699	0.0462771	-0.292434	2.69696	0.0886815	0.297694	7655	0.505203	0.0676615	1.42373	0.0979873	-0.0968142	-0.199402	0.121633	0.164476	Buffering	Buffering	Buffering	Scaling
1141	TAOK3	0.68758	0.0381657	-8.72794	0.000123155	-0.325236	-0.761564	0.00106316	0.363402	7658	0.0797945	-0.11688	-182.43	0.0838355	-0.115661	64.6206	0.987	-0.00121903	Anti-Scaling	Buffering	Buffering	Scaling
1142	TAP1	0.9047	0.0185091	3.29522	0.00538432	-0.441448	9.14632	0.016076	0.459957	7659	0.170706	0.196397	6.40805	0.389955	-0.0833992	-0.466104	0.0738441	0.279796	Buffering	Buffering	Buffering	Scaling
1143	TAP2	0.761009	0.0240143	1.29662	0.0107033	-0.222302	2.53856	0.0146071	0.246316	7660	0.202392	0.211887	11.6282	0.246949	-0.111673	-0.316954	0.0643949	0.32356	Buffering	Buffering	Buffering	Buffering
1144	TAPBP	0.0592447	0.13101	0.565533	9.77878e-06	-0.27553	0.462125	4.5227e-07	0.406539	7661	0.10684	0.227955	9.6666	0.45613	-0.0734934	-0.387817	0.0518902	0.301449	Buffering	Buffering	Buffering	Scaling
1145	TAPT1	0.0490309	0.189454	0.754892	1.09901e-32	-0.635541	-0.384691	7.421e-11	0.824995	7663	0.964309	0.00462648	0.641059	0.00183647	-0.212221	-0.433458	0.0427185	0.216847	Buffering	Buffering	Buffering	Scaling
1146	TARBP2	2.69641e-06	0.360628	0.505156	2.80341e-08	-0.397846	-1.20202	4.54956e-15	0.758474	7665	0.0509347	0.211797	0.978598	0.896939	0.0117399	-5.049	0.111142	0.200057	Buffering	Buffering	Scaling	Scaling
1147	TARS	4.19398e-18	0.45164	-0.633873	0.00401772	-0.256395	-0.196859	1.14581e-10	0.708034	7667	4.5664e-05	0.227072	0.504665	0.00117924	-0.26264	-0.138921	1.00178e-06	0.489712	Buffering	Scaling	Scaling	Scaling
1148	TBC1D1	0.0384125	0.220576	0.63166	6.03611e-13	-0.449511	-1.10123	5.62774e-08	0.670086	7675	0.459167	0.0947197	0.985942	0.034562	-0.194298	-0.946071	0.0392651	0.289017	Buffering	Buffering	Buffering	Scaling
1149	TBC1D15	0.000242189	0.227673	0.772527	0.00562527	-0.178916	-1.17439	2.23525e-07	0.40659	7679	0.00986204	0.134623	0.326283	0.055529	-0.110846	-0.462229	0.000540536	0.245469	Buffering	Buffering	Buffering	Buffering
1150	TBC1D17	0.0164077	0.21892	0.697759	0.00416244	-0.183146	6.46047	0.000117479	0.402066	7680	0.857674	-0.0174657	0.837735	0.134226	-0.201901	-1.42558	0.186564	0.184436	Buffering	Buffering	Buffering	Buffering
1151	TBCB	5.47871e-05	0.372694	0.519322	1.17186e-05	-0.325208	-1.98192	2.85934e-10	0.697902	7694	0.0889571	0.174578	0.770212	0.000181426	-0.298492	-0.125413	2.76088e-05	0.47307	Buffering	Scaling	Scaling	Scaling
1152	TBCC	6.49378e-10	0.428832	0.265759	7.64266e-11	-0.62948	3.51797	4.39169e-20	1.05831	7695	0.0151887	0.174027	0.735285	0.155178	-0.147662	-0.670071	0.0080192	0.32169	Buffering	Buffering	Scaling	Scaling
1153	TBK1	0.000381636	0.187385	0.392668	1.99933e-08	-0.38095	-1.03595	1.32033e-12	0.568335	7700	0.581029	0.0288639	1.00761	0.0243834	-0.108886	-0.40659	0.031886	0.13775	Buffering	Buffering	Buffering	Scaling
1154	TBRG4	1.98949e-06	0.199825	-0.342156	2.51314e-16	-0.440587	-0.137665	1.27793e-23	0.640411	7707	0.537481	-0.0369213	-4.05827	0.000684148	-0.233337	-0.321035	0.00810302	0.196415	Buffering	Buffering	Buffering	Scaling
1155	TCIRG1	0.00132626	0.318943	1.25936	0.00374474	-0.329698	-2.60668	8.342e-07	0.648641	7727	0.469422	0.0601578	2.41395	0.0317972	-0.149942	-0.447844	0.033847	0.2101	Buffering	Buffering	Scaling	Scaling
1156	TEAD3	7.77468e-08	0.304828	0.196619	5.19103e-05	-0.295858	0.412267	3.64231e-12	0.600687	7740	0.0227377	0.147632	1.01142	0.0844567	0.130012	0.994109	0.831634	0.0176197	Buffering	Anti-Scaling	Scaling	Scaling
1157	TFCP2	5.3682e-06	0.311523	0.231714	0.000433827	-0.338257	1.85967	3.05141e-09	0.64978	7765	0.0011121	0.194435	0.23499	0.00123557	-0.194828	-0.373109	1.64607e-06	0.389263	Buffering	Buffering	Scaling	Scaling
1158	TGFBRAP1	0.102633	0.107297	-0.844032	9.15319e-05	-0.372504	-0.274013	1.06632e-05	0.479801	7778	0.0741918	0.164174	0.389067	0.933099	-0.00886662	3.47737	0.194849	0.173041	Buffering	Buffering	Buffering	Scaling
1159	THOC1	4.37473e-05	0.38011	-4.60054	1.64609e-12	-0.39798	-0.374917	2.14844e-13	0.77809	7797	0.451271	0.0487907	0.816115	0.0526996	-0.0628079	-1.25814	0.101892	0.111599	Buffering	Buffering	Scaling	Scaling
1160	THY1	0.973651	-0.00469265	3.66619	0.85183	-0.0258269	3.36498	0.89839	0.0211342	7810	0.726314	0.0428356	-7.25879	0.0599194	0.217677	1.10695	0.197098	-0.174842	Buffering	Anti-Scaling	Buffering	Buffering
1161	THYN1	0.0807249	0.148928	2.24306	0.00331411	-0.217056	-1.58715	0.000253131	0.365984	7811	0.212964	0.138428	1.01886	0.017283	-0.257592	-0.944873	0.00474863	0.39602	Buffering	Scaling	Buffering	Buffering
1162	TIMM10	0.19806	0.0958283	4.75874	0.000134382	-0.286869	-0.897787	4.03782e-05	0.382697	7818	0.194262	-0.0677888	-0.541863	0.00259315	-0.143314	-0.139094	0.147273	0.0755253	Buffering	Buffering	Buffering	Scaling
1163	TIMM50	0.000308318	0.403	0.825867	4.42619e-07	-0.393221	-1.36727	1.59581e-09	0.796221	7828	0.0795421	0.156432	0.761875	0.194662	-0.14256	-0.829131	0.0145635	0.298992	Buffering	Buffering	Scaling	Scaling
1164	TIMM8B	2.20897e-05	0.382422	0.321801	4.50943e-12	-0.648656	1.05987	1.35499e-17	1.03108	7830	0.209346	0.180819	4.4083	0.00124472	-0.339399	-0.296893	0.00188701	0.520218	Buffering	Scaling	Scaling	Scaling
1165	TJAP1	3.07737e-07	0.359388	1.53165	0.000469897	-0.291845	-0.562026	8.75016e-11	0.651233	7839	0.0153528	0.157792	0.606885	0.995291	0.000353157	-1.1101	0.0456529	0.157439	Buffering	Buffering	Scaling	Scaling
1166	TLN1	7.12464e-06	0.300003	0.52853	7.28546e-11	-0.321619	-0.910574	1.91856e-16	0.621622	7853	0.00666961	0.141493	0.197663	0.00253363	-0.15051	-0.870869	9.20667e-07	0.292004	Buffering	Buffering	Scaling	Scaling
1167	TM7SF2	0.0699711	0.181225	1.91551	0.00708209	-0.291601	-3.55506	0.000291252	0.472826	7860	0.0887022	0.265748	1.38663	0.63263	-0.0580587	-2.26205	0.0643793	0.323807	Scaling	Buffering	Buffering	Scaling
1168	TMC4	0.7525	-0.0433402	0.326098	1.80651e-06	-0.523477	0.42993	0.00230965	0.480137	7870	0.998306	-0.000394369	-7.88957	0.410032	-0.160319	-2.19977	0.520883	0.159925	Buffering	Buffering	Buffering	Scaling
1169	TMCC3	0.790018	-0.0391928	0.593411	0.831509	-0.0349483	0.743177	0.982485	-0.00424448	7872	0.121117	-0.202936	-0.769232	0.918584	0.0155385	-15.0354	0.20086	-0.218475	Anti-Scaling	Buffering	Buffering	Buffering
1170	TMED2	0.0147348	0.260612	1.21367	2.13447e-05	-0.523064	-2.4191	8.8272e-08	0.783676	7879	0.882519	0.00862921	0.758524	0.10568	-0.0958194	-2.5536	0.155209	0.104449	Buffering	Buffering	Scaling	Scaling
1171	TMED4	5.89959e-06	0.316595	0.409047	7.1295e-11	-0.438273	-2.54047	4.027e-17	0.754869	7881	0.058426	0.127427	0.438987	0.0114993	-0.121852	-0.485567	0.00095948	0.249279	Buffering	Buffering	Scaling	Scaling
1172	TMEM106B	0.000247469	0.273989	0.568487	2.06124e-07	-0.490238	-2.76148	1.49152e-11	0.764227	7888	0.429666	0.0613333	0.739738	0.051108	-0.186904	-1.1666	0.0203605	0.248237	Buffering	Buffering	Scaling	Scaling
1173	TMEM109	0.0509684	0.106585	-0.288551	0.0121462	-0.129504	-0.159329	0.000259002	0.236089	7889	0.793326	0.0145085	1.15355	0.840607	0.0127159	1.4683	0.979554	0.00179257	Buffering	Buffering	Buffering	Buffering
1174	TMEM119	0.0656261	0.150735	0.628928	0.68347	-0.0256096	0.430417	0.0548025	0.176344	7892	0.402265	0.134546	1.4117	0.637255	0.0865962	2.22534	0.814365	0.0479502	Buffering	Buffering	Buffering	Buffering
1175	TMEM135	0.0013171	0.218124	-0.655672	4.75649e-06	-0.338584	-0.294546	1.73356e-09	0.556708	7900	0.857913	-0.0420104	13.6495	0.0306988	-0.438857	-0.763775	0.16711	0.396847	Buffering	Scaling	Buffering	Scaling
1176	TMEM14C	4.74777e-11	0.426112	0.45542	1.06403e-09	-0.583881	-0.601259	6.83986e-19	1.00999	7902	0.00915309	0.249352	0.848489	0.0197361	-0.248998	-0.372536	0.000259712	0.49835	Buffering	Buffering	Scaling	Scaling
1177	TMEM33	0.000220837	0.258983	0.201984	1.13674e-48	-0.598878	-0.33839	1.95981e-16	0.857861	7937	0.0030245	0.228068	0.10064	0.000762933	-0.191305	-0.990105	4.22212e-06	0.419372	Buffering	Buffering	Scaling	Scaling
1178	TMEM87B	0.086081	-0.173712	0.850989	0.00292597	-0.404395	1.38954	0.134987	0.230683	7956	0.382873	-0.0920425	-4.43385	0.334547	-0.154352	-2.45752	0.73042	0.06231	Buffering	Buffering	Anti-Scaling	Scaling
1179	TMPO	0.184085	0.109706	-0.787401	6.74081e-06	-0.424589	-0.422785	9.34857e-07	0.534295	7964	0.489277	0.0396491	0.43096	5.47673e-08	-0.324486	-0.120804	1.9913e-07	0.364135	Buffering	Scaling	Buffering	Scaling
1180	TMTC3	0.000249622	0.282404	8.14605	8.16671e-07	-0.37397	-0.40698	1.62633e-11	0.656375	7970	0.157901	0.0806956	0.322338	0.000122465	-0.196004	-0.22882	2.63395e-05	0.2767	Buffering	Buffering	Scaling	Scaling
1181	TNKS1BP1	0.19501	0.102318	0.634587	0.0233733	-0.192361	1.67175	0.00259101	0.294679	7989	0.495905	-0.0338401	-0.687139	0.439872	-0.0510413	-0.956426	0.805151	0.0172012	Buffering	Buffering	Buffering	Buffering
1182	TNS1	0.408773	0.0509866	0.249151	0.0417608	-0.154469	0.308128	0.022177	0.205456	7996	0.608348	-0.059461	-2.94146	0.630103	-0.0388029	-1.75209	0.872256	-0.0206581	Buffering	Buffering	Buffering	Buffering
1183	TNS3	0.141522	0.139956	0.703016	0.000986756	-0.341036	2.15581	0.000114064	0.480992	7998	0.204817	0.0812	1.15792	0.16911	-0.0745539	-0.542749	0.0378246	0.155754	Buffering	Buffering	Buffering	Scaling
1184	TNXB	0.434496	0.0371582	0.219355	0.836674	-0.0132942	0.260276	0.465971	0.0504524	7999	0.937611	0.0170879	-2.5574	0.494737	-0.239072	-2.4913	0.49108	0.25616	Buffering	Buffering	Buffering	Buffering
1185	TOMM40	0.00111317	0.255298	-0.581423	2.97478e-09	-0.408465	-0.269459	9.64461e-12	0.663762	8008	0.00378266	0.209474	0.196785	0.298898	-0.101725	-2.30135	0.00441997	0.311199	Buffering	Buffering	Scaling	Scaling
1186	TPCN1	0.0715331	0.164881	-4.89099	0.000130321	-0.305262	-0.537526	2.2095e-05	0.470144	8034	0.0980286	-0.159487	-0.818591	0.632272	0.0693307	1.2375	0.155939	-0.228817	Anti-Scaling	Buffering	Buffering	Scaling
1187	TPM2	0.205554	0.194261	2.02136	0.00738689	-0.282105	6.93178	0.00206277	0.476366	8041	0.186767	-0.191001	-3.1705	0.263594	-0.129195	-6.19027	0.665167	-0.0618061	Anti-Scaling	Buffering	Buffering	Scaling
1188	TPMT	0.00379747	0.248479	-0.897616	0.00242119	-0.31493	-0.339236	1.99076e-06	0.56341	8044	0.0189526	0.189471	234.476	0.178557	-0.178996	-0.584795	0.0126768	0.368466	Buffering	Buffering	Buffering	Scaling
1189	TRA2A	2.58285e-05	0.276383	0.726357	1.3334e-07	-0.332861	-0.727381	2.34502e-13	0.609243	8057	0.0890451	0.101201	0.525516	0.356711	-0.0540699	-1.6291	0.0386666	0.155271	Buffering	Buffering	Scaling	Scaling
1190	TRAFD1	0.215401	0.0812418	-0.69054	0.245557	-0.0534579	-0.18125	0.0544813	0.1347	8069	0.060383	0.118513	0.497974	0.038664	-0.157309	-0.537442	0.00247035	0.275821	Buffering	Buffering	Buffering	Buffering
1191	TRAPPC4	1.78908e-06	0.2964	-1.0584	1.76218e-12	-0.428012	-0.170638	5.65149e-19	0.724412	8081	0.498321	0.040558	0.380134	0.203092	-0.0700847	1.29266	0.129385	0.110643	Buffering	Buffering	Scaling	Scaling
1192	TRIAP1	3.96249e-05	0.211048	0.793883	3.98091e-09	-0.405566	-0.447918	5.87832e-15	0.616613	8089	0.427118	0.0941399	1.15838	0.00805784	-0.302525	-0.53273	0.00305249	0.396665	Buffering	Scaling	Buffering	Scaling
1193	TRIM26	0.000547448	0.198429	1.35727	1.98241e-08	-0.344319	-0.275668	1.16843e-13	0.542748	8098	0.193671	0.0722459	1.10015	0.128989	-0.106886	-0.367567	0.0214027	0.179132	Buffering	Buffering	Buffering	Scaling
1194	TRIM27	5.25162e-08	0.307991	3.29562	4.5023e-15	-0.564706	-0.155116	2.12974e-24	0.872697	8099	0.00108698	0.301979	0.915959	0.593202	-0.0359009	-0.187931	0.000393127	0.33788	Scaling	Buffering	Scaling	Scaling
1195	TRIM28	0.0385091	0.239806	-1.30694	1.11508e-06	-0.314767	-0.239297	1.43668e-05	0.554573	8100	0.107428	0.181376	0.703126	0.00122575	-0.287671	-0.340258	0.000379577	0.469047	Buffering	Scaling	Buffering	Scaling
1196	TRIM29	0.132479	0.276496	2.44137	0.0241346	-0.390001	10.4574	0.00262866	0.666496	8101	0.112223	0.334108	6.08534	0.260482	-0.177088	-0.791576	0.0284082	0.511196	Scaling	Buffering	Scaling	Scaling
1197	TRIM38	3.04483e-06	0.365258	0.277615	1.41438e-06	-0.49792	0.551402	1.20593e-12	0.863178	8106	0.0127406	0.13333	0.42222	0.20776	-0.101996	-0.599264	0.0138057	0.235327	Buffering	Buffering	Scaling	Scaling
1198	TRIO	1.91563e-14	0.389352	-2.5492	0.000534458	-0.287147	-0.239798	1.28085e-11	0.676499	8114	0.014689	0.128763	0.745812	0.0412283	-0.168678	-0.31524	0.00191274	0.297441	Buffering	Buffering	Scaling	Scaling
1199	TRIP12	0.0276006	0.187729	2.53257	0.0090197	-0.350887	-1.08275	0.00046734	0.538615	8118	0.0994437	0.108129	0.26486	0.012359	-0.12133	-0.237815	0.00335574	0.229459	Buffering	Buffering	Buffering	Scaling
1200	TRIP13	4.23812e-20	0.657604	-0.894521	0.000748795	-0.416039	-0.263073	1.71417e-12	1.07364	8119	5.98934e-08	0.510969	0.999112	0.0339599	-0.242627	-0.186358	1.2121e-06	0.753596	Scaling	Buffering	Scaling	Scaling
1201	TRPM4	0.927654	-0.0140542	1.08653	1.12198e-09	-0.705288	6.01599	7.23375e-05	0.691234	8141	0.833681	0.0302442	0.914714	0.072423	-0.294271	-1.11681	0.0764582	0.324515	Buffering	Scaling	Buffering	Scaling
1202	TSEN34	0.00122872	0.283205	0.393538	1.0362e-16	-0.586544	-1.43673	1.68318e-14	0.869749	8157	0.758755	0.0424065	3.1497	0.995755	-0.000563525	5.21162	0.786568	0.04297	Buffering	Buffering	Scaling	Scaling
1203	TSFM	5.7894e-06	0.295128	0.606843	1.41185e-11	-0.463287	-0.498806	2.27153e-17	0.758415	8159	0.0319291	0.192246	1.67153	0.0206592	-0.233343	-0.485815	0.000837088	0.425589	Buffering	Buffering	Scaling	Scaling
1204	TSN	0.0350378	0.127766	0.463167	0.000148568	-0.418927	-1.44917	8.63795e-06	0.546693	8163	0.0852412	0.23183	0.695747	0.0011726	-0.302686	-0.199709	0.00116486	0.534516	Buffering	Scaling	Buffering	Scaling
1205	TSPAN13	0.0530683	0.264632	-11.0667	0.000180854	-0.45508	-0.911125	8.58569e-06	0.719712	8165	0.763199	0.0764361	17.7303	0.341941	-0.148214	-1.28766	0.418335	0.22465	Buffering	Buffering	Scaling	Scaling
1206	TSPAN8	0.103476	0.510477	-4.26929	0.192678	-0.402412	-2.22622	0.0175733	0.912889	8172	0.0510967	0.522116	-20.2792	0.0891869	-0.588332	-1.36173	0.00306641	1.11045	Scaling	Scaling	Scaling	Scaling
1207	TTC9C	0.0203252	0.144977	0.403923	0.000119938	-0.266831	2.18136	5.57147e-07	0.411809	8207	0.785672	0.0119479	-1.32002	0.00490564	-0.152908	-0.201286	0.00769807	0.164856	Buffering	Buffering	Buffering	Scaling
1208	TUBA1C	0.00608869	0.202282	-0.313226	0.000165547	-0.287464	-0.198841	1.69814e-07	0.489746	8220	0.405173	-0.0293416	-3.87929	0.246873	-0.0399468	-1.02611	0.792318	0.0106052	Buffering	Buffering	Buffering	Scaling
1209	TUBA4A	0.000154681	-0.314764	-0.349081	0.329278	0.104134	-0.842921	0.00102951	-0.418899	8222	0.678471	0.0232587	2.16949	0.182017	0.059548	0.319914	0.585976	-0.0362893	Buffering	Buffering	Anti-Scaling	Anti-Scaling
1210	TUBB	3.7195e-11	0.409059	-0.384383	0.0065068	-0.209307	-0.177202	1.58549e-11	0.618365	8224	0.0774883	0.0601388	0.374017	0.0504157	0.0715138	0.187267	0.75734	-0.011375	Buffering	Buffering	Scaling	Buffering
1211	TUBB2A	0.53336	0.0652788	-0.360805	0.574275	0.0722747	-0.296106	0.961264	-0.00699597	8226	0.241842	0.0389681	0.850645	0.0243931	0.0820798	0.177133	0.261502	-0.0431117	Buffering	Buffering	Buffering	Buffering
1212	TUBB6	0.0380507	0.201526	-0.538317	0.314439	-0.0625453	-0.308108	0.00732747	0.264072	8230	0.662148	-0.0162112	1.48438	0.538652	-0.0191195	3.02983	0.939455	0.00290836	Buffering	Buffering	Buffering	Buffering
1213	TUT1	0.0133508	0.128932	-0.205935	1.01121e-05	-0.243839	-0.135126	2.41065e-08	0.372771	8244	0.35602	0.100963	1.52326	0.743598	0.0264728	2.16728	0.543612	0.0744897	Buffering	Buffering	Buffering	Buffering
1214	TWF1	2.11352e-05	0.324284	0.577766	9.74393e-06	-0.412315	-1.67108	3.27987e-11	0.7366	8245	0.546723	0.0397254	0.966922	0.102995	-0.0925662	-1.07737	0.0903602	0.132292	Buffering	Buffering	Scaling	Scaling
1215	TWSG1	3.07916e-05	0.49907	0.692433	4.95123e-10	-0.465221	10.9982	4.59106e-13	0.964291	8248	0.274645	0.132025	-33.9752	0.00462364	-0.220849	-0.474883	0.0078144	0.352874	Buffering	Buffering	Scaling	Scaling
1216	TXNDC5	9.18557e-07	0.319046	-0.294227	6.34171e-08	-0.440367	-0.121322	1.42577e-15	0.759413	8258	0.167183	0.141462	1.301	0.0125135	-0.267257	-0.433585	0.00158891	0.408719	Buffering	Scaling	Scaling	Scaling
1217	TXNRD1	0.000495385	0.269654	-0.452156	1.01134e-05	-0.433575	-0.351616	6.0862e-10	0.703229	8264	0.0824506	0.0813379	0.292275	0.000784654	-0.188389	-0.275566	3.9199e-05	0.269727	Buffering	Buffering	Scaling	Scaling
1218	TYROBP	0.165451	0.166161	0.0983864	0.948586	0.00799093	0.228244	0.280935	0.15817	8270	0.950213	-0.008045	207.523	0.640317	-0.071689	-2.80199	0.695413	0.063644	Buffering	Buffering	Buffering	Buffering
1219	U2AF1	0.000648393	0.331318	-0.862441	5.56705e-10	-0.425673	-0.288218	3.83137e-11	0.756992	8275	0.372961	0.0616319	1.35457	0.0396491	0.0889914	0.582163	0.702177	-0.0273594	Buffering	Buffering	Scaling	Scaling
1220	U2AF2	0.138715	0.118817	-0.385283	0.00296536	-0.164258	-0.200127	0.0014213	0.283075	8276	0.0525347	0.109338	0.260053	0.85887	-0.008179	0.720968	0.0562668	0.117517	Buffering	Buffering	Buffering	Buffering
1221	UBAP1	4.08223e-05	0.275478	0.259173	6.68629e-28	-0.524769	2.15825	3.7604e-22	0.800247	8290	0.000519453	0.182134	0.158181	0.0022091	-0.151936	-0.369673	1.17008e-09	0.334069	Buffering	Buffering	Scaling	Scaling
1222	UBAP2	5.39466e-07	0.421416	2.23435	3.46449e-13	-0.411329	-0.352889	2.31554e-18	0.832745	8291	0.000434067	0.288016	0.29146	5.765e-07	-0.308169	-0.32103	5.38517e-10	0.596185	Scaling	Scaling	Scaling	Scaling
1223	UBE2F	0.0840296	0.131585	0.540784	0.00707728	-0.279521	4.39614	0.000734293	0.411106	8302	0.806045	0.0224424	0.5057	0.327987	-0.14094	-5.50948	0.307243	0.163383	Buffering	Buffering	Buffering	Scaling
1224	UBE2G2	0.000152552	0.276795	-0.381182	2.76173e-20	-0.478035	-0.12957	1.2913e-16	0.75483	8304	0.335207	0.049973	0.41456	0.011686	-0.112711	-0.434877	0.0080632	0.162684	Buffering	Buffering	Scaling	Scaling
1225	UBE2L6	0.837793	0.0212684	0.393434	0.000651658	-0.362265	0.497909	0.00187352	0.383534	8311	0.851745	-0.0204485	-2.48046	0.162868	-0.171186	-0.96796	0.299952	0.150738	Buffering	Buffering	Buffering	Scaling
1226	UBE2M	0.0876111	0.207754	-0.630141	6.70835e-08	-0.459923	-0.254161	1.40114e-06	0.667677	8312	0.285955	0.0681869	0.373198	0.127425	-0.0967949	-1.46474	0.0311186	0.164982	Buffering	Buffering	Buffering	Scaling
1227	UBE2N	0.000121664	0.235158	0.799127	6.27922e-16	-0.633022	-0.360274	7.03673e-21	0.868181	8313	0.0197436	0.148332	0.279025	1.81209e-09	-0.316918	-0.122559	1.85722e-08	0.46525	Buffering	Scaling	Buffering	Scaling
1228	UBE2R2	6.66821e-08	0.340207	0.206115	6.8025e-20	-0.437878	2.21682	7.4261e-25	0.778085	8317	0.0229538	0.173164	0.454184	0.838375	0.0108973	2.70535	0.0190611	0.162267	Buffering	Buffering	Scaling	Scaling
1229	UBE2S	0.00299145	0.300001	-0.297925	9.42458e-08	-0.4607	-0.228142	6.42129e-10	0.760701	8318	0.452599	0.0857333	0.990097	0.784614	0.0326745	1.55092	0.702783	0.0530587	Buffering	Buffering	Scaling	Scaling
1230	UBE4A	7.49692e-06	0.250447	-1.91018	8.05366e-13	-0.393379	-0.176319	2.55016e-18	0.643825	8325	0.0093759	0.139113	0.301349	0.0955875	-0.0735322	-0.446743	0.000542087	0.212645	Buffering	Buffering	Scaling	Scaling
1231	UBR2	8.86944e-09	0.302703	0.347386	2.49093e-11	-0.473901	-0.583253	5.69428e-20	0.776603	8341	0.00916241	0.135649	0.277132	0.00553913	-0.17677	-0.254425	3.12752e-05	0.31242	Buffering	Buffering	Scaling	Scaling
1232	UCHL1	0.0060142	0.878267	1.18046	0.000326105	-0.581252	4.37105	2.00469e-05	1.45952	8353	0.46129	0.223829	8.50278	0.313684	-0.142493	-1.89622	0.237945	0.366321	Buffering	Buffering	Scaling	Scaling
1233	UGDH	0.0282063	0.236279	-0.264648	5.62247e-15	-0.478231	-0.20797	3.26243e-08	0.714511	8365	0.125479	0.165741	0.417903	0.0325784	-0.15838	-2.4603	0.0107455	0.324121	Buffering	Buffering	Buffering	Scaling
1234	UHRF2	0.000294041	0.295137	3.59203	6.44127e-26	-0.607166	-0.294908	3.20831e-20	0.902303	8373	0.12667	0.138749	0.686353	0.00326955	-0.212899	-0.870925	0.000269657	0.351648	Buffering	Buffering	Scaling	Scaling
1235	UNC119B	1.18453e-05	0.290901	0.504682	4.50463e-12	-0.419222	-0.579114	5.79771e-17	0.710122	8378	0.47293	0.0569413	1.51794	7.02022e-06	-0.322997	-0.181931	8.37809e-05	0.379938	Buffering	Scaling	Scaling	Scaling
1236	UNC93B1	0.0294549	0.195327	0.409907	9.33002e-08	-0.522166	1.24758	9.61118e-10	0.717493	8383	0.767601	0.0346905	2.82944	0.00299416	-0.380846	-0.699796	0.00850626	0.415536	Buffering	Scaling	Buffering	Scaling
1237	UNG	0.00632712	0.187793	0.558098	3.60987e-14	-0.555466	-0.665366	4.57464e-16	0.743259	8384	0.257816	0.0988043	0.690927	0.0145605	-0.256843	-0.583257	0.00323575	0.355647	Buffering	Scaling	Buffering	Scaling
1238	UPP1	0.33138	-0.120225	-0.510105	0.345301	-0.10991	-0.407209	0.941087	-0.0103147	8392	0.793208	-0.0294918	-3.39753	0.352036	-0.0889034	-0.818687	0.60409	0.0594116	Buffering	Buffering	Anti-Scaling	Buffering
1239	UQCRFS1	1.7019e-05	0.60411	0.683526	0.637375	-0.0628487	5.18575	0.00015341	0.666959	8402	0.252748	-0.0902593	-7.67909	0.100265	-0.128863	-1.50592	0.675114	0.0386036	Buffering	Buffering	Scaling	Buffering
1240	URB1	0.000845093	0.224681	-1.00711	8.00121e-20	-0.444092	-0.187748	3.2487e-15	0.668773	8405	0.852369	-0.0103109	1.95951	0.0737058	-0.0725924	-0.675906	0.279599	0.0622814	Buffering	Buffering	Buffering	Scaling
1241	USF2	0.00170407	0.26036	0.477834	0.00020762	-0.241495	16.5659	6.03152e-07	0.501855	8414	0.886888	0.00864915	1.16575	0.794524	-0.0187426	5.06066	0.743782	0.0273918	Buffering	Buffering	Scaling	Buffering
1242	USP14	9.2769e-05	0.354443	-3.67268	9.21217e-20	-0.48009	-0.334889	1.17895e-14	0.834532	8422	3.37489e-06	0.266893	0.0870831	2.9352e-10	-0.228321	-0.245523	1.134e-11	0.495214	Scaling	Buffering	Scaling	Scaling
1243	USP15	0.0842573	0.0992449	-0.505097	4.19749e-06	-0.263976	-0.210532	5.85815e-07	0.363221	8423	0.997707	-0.000161306	2.26096	0.0616974	-0.117507	-0.674833	0.11617	0.117346	Buffering	Buffering	Buffering	Scaling
1244	USP16	4.62785e-05	0.293441	0.628277	5.97078e-21	-0.497714	-0.401725	1.44082e-17	0.791154	8424	0.241897	0.097217	0.511121	0.00672041	-0.155633	-0.608968	0.00704116	0.25285	Buffering	Buffering	Scaling	Scaling
1245	USP25	0.000489679	0.30082	0.355473	8.48853e-14	-0.699912	-2.4816	5.10097e-17	1.00073	8430	0.453653	-0.0500998	0.792604	0.132461	-0.146925	-3.8426	0.346499	0.096825	Buffering	Buffering	Scaling	Scaling
1246	USP28	1.29378e-07	0.526278	0.835054	0.000420816	-0.332355	-1.6825	2.49645e-12	0.858633	8431	7.00634e-05	0.321243	0.266863	0.13922	-0.109451	-0.593365	2.08994e-05	0.430694	Scaling	Buffering	Scaling	Scaling
1247	UTP20	7.51441e-05	0.295416	0.851455	5.192e-06	-0.40843	-0.990113	4.20951e-11	0.703846	8457	0.647768	-0.0288753	39.5551	0.0239296	-0.142303	-0.477743	0.138576	0.113427	Buffering	Buffering	Scaling	Scaling
1248	VAPA	2.71794e-05	0.255495	0.409687	3.02524e-36	-0.4918	-0.505416	6.5428e-22	0.747296	8475	0.000739617	0.18137	0.138588	2.00883e-11	-0.218282	-0.153498	5.6057e-09	0.399652	Buffering	Buffering	Scaling	Scaling
1249	VARS	2.56917e-10	0.413815	-0.2132	2.065e-06	-0.352676	-0.0856694	9.83362e-17	0.766492	8477	0.00327451	0.167398	0.394024	7.93821e-09	-0.334349	-0.0532872	1.03694e-10	0.501747	Buffering	Scaling	Scaling	Scaling
1250	VARS2	0.00182004	0.184463	-0.40534	2.52764e-05	-0.376878	-0.249542	1.63208e-08	0.561341	8478	0.203155	0.145725	2.18704	0.961865	-0.00753148	-8.01929	0.405832	0.153256	Buffering	Buffering	Buffering	Scaling
1251	VASP	0.00977049	0.258141	0.253739	5.29649e-05	-0.38541	0.951615	8.64559e-08	0.643551	8481	0.155102	0.0851958	0.178374	0.000848959	-0.249755	-0.449259	5.81189e-05	0.334951	Buffering	Buffering	Scaling	Scaling
1252	VCP	5.31438e-07	0.293427	-0.579111	5.81128e-15	-0.360405	-0.18091	5.41016e-22	0.653831	8490	2.87621e-06	0.273317	0.174104	5.3371e-10	-0.255455	-0.211179	3.67778e-13	0.528772	Scaling	Scaling	Scaling	Scaling
1253	VEZT	0.000399093	0.211618	0.24393	5.88715e-12	-0.478071	4.07108	3.51882e-16	0.689689	8496	0.123022	0.156388	0.379067	0.0654859	-0.190777	-0.719101	0.00317697	0.347165	Buffering	Buffering	Buffering	Scaling
1254	VPS11	4.25511e-05	0.24309	0.426488	4.68874e-09	-0.313779	-1.3424	3.04094e-14	0.55687	8512	0.752977	0.0104408	0.352294	0.418821	0.0282233	0.243742	0.638805	-0.0177825	Buffering	Buffering	Buffering	Scaling
1255	VPS26B	0.00383356	0.182688	1.7443	9.67303e-10	-0.303067	-0.269553	1.71774e-11	0.485755	8521	0.063678	0.138508	0.551313	0.0119495	-0.155182	-0.544903	0.00124136	0.29369	Buffering	Buffering	Buffering	Scaling
1256	VPS29	0.0152537	0.148075	0.438959	2.77604e-08	-0.458144	-1.58815	6.91995e-11	0.606219	8523	0.810727	-0.00963657	0.549456	0.10195	-0.0678737	-3.34891	0.237145	0.0582371	Buffering	Buffering	Buffering	Scaling
1257	VPS33A	2.81561e-05	0.2864	1.35735	0.000117263	-0.243951	-0.496263	1.84339e-10	0.530351	8524	0.0161331	0.0981239	0.287471	0.365568	-0.0380218	-0.665735	0.00877721	0.136146	Buffering	Buffering	Scaling	Buffering
1258	VPS37B	0.696001	0.0311507	0.751008	0.0241737	-0.175678	1.17893	0.0338247	0.206828	8529	0.224384	0.075324	0.529663	0.761348	-0.0220659	3.74715	0.252942	0.0973899	Buffering	Buffering	Buffering	Buffering
1259	VPS37C	0.456456	0.0439505	-15.4225	8.48924e-05	-0.225953	-0.586234	0.000217569	0.269903	8530	0.377732	0.0993853	1.03874	0.769126	0.0326892	2.12717	0.633757	0.0666961	Buffering	Buffering	Buffering	Buffering
1260	VPS41	1.16779e-06	0.281241	0.217427	3.52392e-17	-0.581362	-6.41258	2.74102e-24	0.862604	8532	0.538119	0.0318279	0.629242	0.555193	0.032468	0.763925	0.99232	-0.000640142	Buffering	Buffering	Scaling	Scaling
1261	VPS52	7.87603e-08	0.322741	-0.926574	1.27553e-08	-0.426775	-0.169614	8.18522e-17	0.749516	8538	0.480233	0.0309694	0.730051	0.412262	-0.0451077	-1.54837	0.220448	0.0760771	Buffering	Buffering	Scaling	Scaling
1262	WDFY1	0.212761	0.103056	0.936607	0.00740704	-0.299267	-3.32234	0.00187647	0.402323	8579	0.84859	0.0144149	0.865629	0.865213	-0.0101416	0.635641	0.78181	0.0245565	Buffering	Buffering	Buffering	Scaling
1263	WDR1	0.00232118	0.296012	0.762135	3.98403e-24	-0.513743	-0.366365	6.04235e-11	0.809755	8583	0.172983	0.0994187	0.243094	4.78614e-09	-0.273866	-0.267108	8.58567e-05	0.373284	Buffering	Scaling	Scaling	Scaling
1264	WDR12	1.06474e-05	0.358179	-0.992671	0.00389542	-0.314317	-0.306075	7.77075e-07	0.672496	8585	0.107235	0.132347	0.557598	0.00653389	-0.15972	-0.126544	0.00263897	0.292068	Buffering	Buffering	Scaling	Scaling
1265	WDR33	0.351302	0.0473064	0.614771	0.0551613	-0.124856	-4.92982	0.0173278	0.172163	8593	0.663552	-0.0475837	4.92864	0.413432	-0.0577387	2.40339	0.934079	0.010155	Buffering	Buffering	Buffering	Buffering
1266	WDR4	0.136359	0.168228	-0.520243	4.76404e-06	-0.37721	-0.309847	1.34907e-05	0.545438	8597	0.0276404	0.22943	0.511075	0.0497984	-0.111304	-0.468038	0.00276132	0.340735	Buffering	Buffering	Buffering	Scaling
1267	WDR46	1.51946e-10	0.354963	-0.43684	8.63507e-10	-0.422082	-0.11303	1.56403e-19	0.777045	8603	0.718221	0.0161887	11.2706	0.345909	-0.0424406	-0.270388	0.235345	0.0586293	Buffering	Buffering	Scaling	Scaling
1268	WDR70	3.08789e-18	0.370477	0.326431	0.000215395	-0.27455	-9.74928	2.18918e-12	0.645028	8614	0.0023007	0.160336	1.07555	0.817522	-0.0107657	-0.220225	0.00636038	0.171102	Buffering	Buffering	Scaling	Scaling
1269	WDR74	0.0689222	0.0986962	-0.883519	4.74074e-11	-0.351753	-0.192012	5.13337e-11	0.450449	8616	0.792262	-0.0148099	-33.2709	0.485162	-0.0440074	-1.79139	0.689957	0.0291975	Buffering	Buffering	Buffering	Scaling
1270	WDR75	3.8513e-06	0.360205	2.06406	0.000372948	-0.40184	-0.450479	3.45508e-08	0.762045	8617	0.544188	0.0476179	1.26595	0.119285	-0.114272	-0.426716	0.110886	0.16189	Buffering	Buffering	Scaling	Scaling
1271	WFS1	0.0771122	0.229503	0.936773	1.30507e-11	-0.443078	-1.42009	4.0794e-06	0.672581	8631	0.126703	0.164036	0.223612	0.000888488	-0.300351	-1.33306	0.000145801	0.464387	Buffering	Scaling	Buffering	Scaling
1272	WIPF1	0.00829833	-0.284056	-1.72498	0.197789	0.182121	3.01528	0.00613535	-0.466177	8632	0.0255195	-0.271185	-0.481461	0.245076	0.148006	0.575811	0.00981874	-0.419191	Anti-Scaling	Anti-Scaling	Anti-Scaling	Anti-Scaling
1273	WIPI2	1.89033e-10	0.429919	0.265932	4.97331e-14	-0.465825	-1.9017	2.54866e-26	0.895744	8636	0.000964457	0.300669	0.373777	0.0224511	-0.116369	-0.413158	2.46884e-05	0.417039	Scaling	Buffering	Scaling	Scaling
1274	WNT11	0.0203648	0.370442	0.845539	0.186485	0.184886	0.616633	0.298353	0.185556	8642	0.801809	0.0549799	6.25219	0.359107	-0.178636	-2.65074	0.356862	0.233616	Buffering	Buffering	Scaling	Anti-Scaling
1275	WRNIP1	6.93307e-10	0.288439	0.255404	1.92736e-08	-0.314434	-1.71378	1.9218e-18	0.602874	8650	0.0119156	0.160831	1.20785	0.00842906	-0.216356	-0.225645	0.000139037	0.377187	Buffering	Buffering	Scaling	Scaling
1276	XPO5	5.76124e-14	0.524876	-0.824551	4.97678e-07	-0.392197	-0.147354	2.81134e-20	0.917074	8668	0.000661073	0.340493	0.633321	0.00498723	-0.237013	-0.183081	6.76709e-07	0.577507	Scaling	Buffering	Scaling	Scaling
1277	XPOT	2.47461e-06	0.354453	-0.856273	7.47712e-11	-0.458682	-0.178106	4.81267e-17	0.813135	8671	0.00179368	0.190004	0.322961	1.79578e-05	-0.24685	-0.152429	4.37124e-08	0.436853	Buffering	Buffering	Scaling	Scaling
1278	XRCC1	0.00069598	0.327473	4.16326	1.14567e-08	-0.372581	-0.376148	5.54739e-10	0.700054	8673	0.00640989	0.286333	0.44399	0.690972	0.0359444	2.14852	0.0387902	0.250389	Scaling	Buffering	Scaling	Scaling
1279	XRCC5	9.2531e-07	0.307561	0.449083	0.000598589	-0.303517	-0.651455	2.0486e-08	0.611078	8675	0.805905	0.0167874	0.590173	0.00374345	-0.127588	-0.225774	0.0614575	0.144376	Buffering	Buffering	Scaling	Scaling
1280	YAP1	9.10096e-05	0.281406	0.308084	2.60454e-11	-0.485194	1.38546	4.17983e-16	0.7666	8681	0.00409049	0.191706	0.338342	7.36006e-05	-0.322053	-0.256962	2.49874e-07	0.513758	Buffering	Scaling	Scaling	Scaling
1281	YEATS4	0.000672771	0.294325	-2.32869	1.35219e-05	-0.489431	-0.670018	1.90068e-09	0.783757	8688	0.00278317	0.16365	0.221274	0.0897579	-0.113423	-0.82459	0.000507807	0.277073	Buffering	Buffering	Scaling	Scaling
1282	YES1	0.000363576	0.337987	-12.0206	5.46782e-09	-0.324254	-0.486319	4.0245e-10	0.662241	8689	0.0451492	0.147266	0.394154	0.000882637	-0.102693	-0.791233	0.00179077	0.249959	Buffering	Buffering	Scaling	Scaling
1283	YIF1A	0.0119333	0.183572	5.37606	1.60109e-05	-0.310428	-0.599701	1.02735e-07	0.493999	8690	0.59956	0.0352082	0.612887	0.208592	-0.138291	-1.72955	0.145118	0.173499	Buffering	Buffering	Buffering	Scaling
1284	YIF1B	7.05079e-05	0.436414	-0.899556	0.000347638	-0.254421	-0.268748	2.36736e-08	0.690835	8691	0.795907	0.0267477	0.726582	0.145385	-0.178337	-1.15678	0.113832	0.205085	Buffering	Buffering	Scaling	Scaling
1285	YIPF3	4.23474e-05	0.284903	0.531246	1.62437e-05	-0.393438	-17.1816	2.81601e-10	0.678341	8694	0.13711	0.0860283	0.40545	0.0945102	-0.145173	-0.64791	0.0154069	0.231201	Buffering	Buffering	Scaling	Scaling
1286	YKT6	1.52731e-05	0.302704	-0.444885	5.21342e-09	-0.34991	-0.128723	1.13595e-14	0.652614	8698	0.0580176	0.167218	0.79328	0.00054746	-0.167951	-0.236179	0.000708069	0.335169	Buffering	Buffering	Scaling	Scaling
1287	ZC3H15	0.00991139	0.215168	1.56491	0.00328593	-0.336161	-0.935154	7.18846e-05	0.551329	8740	0.0137067	0.177281	0.261866	0.00979567	-0.201129	-0.20619	0.000225915	0.37841	Buffering	Buffering	Buffering	Scaling
1288	ZCCHC8	0.00626755	0.148038	0.862349	5.12596e-07	-0.321027	-0.580614	1.94926e-10	0.469065	8753	0.209963	0.0640816	0.428609	0.0126977	-0.126489	-0.351971	0.0021055	0.19057	Buffering	Buffering	Buffering	Scaling
1289	ZCRB1	4.58279e-05	0.285596	0.50424	0.0094632	-0.197468	9.23044	5.28926e-07	0.483064	8755	0.222599	0.139173	0.629179	0.305323	-0.0735637	-1.58862	0.0915185	0.212736	Buffering	Buffering	Scaling	Buffering
1290	ZDHHC5	0.142359	0.0986729	0.362792	1.98905e-08	-0.404969	1.10159	1.05277e-08	0.503642	8762	0.172521	0.146861	1.06923	0.504707	-0.0488988	-1.25795	0.100935	0.19576	Buffering	Buffering	Buffering	Scaling
1291	ZFP91	0.966927	-0.00271563	-0.951289	0.0864447	-0.144415	-1.03814	0.143059	0.141699	8779	0.670605	0.0296908	0.821849	0.162876	-0.0917439	-2.15933	0.150016	0.121435	Buffering	Buffering	Buffering	Buffering
1292	ZFPL1	0.00182221	0.179248	0.531938	0.00610035	-0.159679	13.2889	3.76483e-06	0.338927	8781	0.00858288	0.166353	0.411283	0.0219919	-0.118923	-0.243296	9.67583e-05	0.285277	Buffering	Buffering	Buffering	Buffering
1293	ZFR	0.000168689	0.143733	0.412219	0.12397	-0.100366	0.884363	0.000531772	0.2441	8782	0.0522249	0.0703621	0.534508	0.223284	0.0454063	0.170032	0.55676	0.0249558	Buffering	Buffering	Buffering	Buffering
1294	ZMIZ2	4.60971e-08	0.347283	0.189686	5.31659e-15	-0.494501	0.647802	6.28861e-24	0.841783	8799	0.787476	0.0189948	1.44843	0.423779	-0.0465993	-2.37743	0.374185	0.0655941	Buffering	Buffering	Scaling	Scaling
1295	ZNF318	1.15877e-09	0.346668	0.656963	5.96468e-10	-0.388743	-0.281325	2.8113e-20	0.73541	8825	0.142107	0.199523	1.00501	0.151345	-0.182838	-0.87172	0.0271585	0.382361	Buffering	Buffering	Scaling	Scaling
1296	ZNF428	0.00418947	0.293153	1.49953	7.40204e-05	-0.317138	-1.02429	2.99508e-07	0.610291	8839	0.0555423	0.238451	0.449718	0.087659	-0.281814	-0.827624	0.00431313	0.520265	Buffering	Scaling	Scaling	Scaling
1297	ZNF451	0.000515134	0.16592	-0.352288	3.55562e-07	-0.364446	-0.178316	2.28301e-11	0.530367	8841	0.175222	0.148554	1.14943	0.253829	-0.136599	-0.950292	0.0457676	0.285154	Buffering	Buffering	Buffering	Scaling
1298	ZNF574	0.00119116	0.226913	0.263287	7.20045e-06	-0.223861	0.764732	3.01968e-08	0.450774	8855	0.128881	0.136508	0.691103	0.418129	-0.120976	-1.91944	0.121306	0.257485	Buffering	Buffering	Buffering	Buffering
1299	ZNF622	1.75317e-17	0.376617	0.823826	4.75077e-10	-0.485723	-0.214635	2.42949e-19	0.862341	8864	0.00104072	0.140656	0.435059	0.78625	-0.0328709	-3.39316	0.175437	0.173526	Buffering	Buffering	Scaling	Scaling
1300	ZNF664	2.42147e-05	0.32855	0.219021	3.97178e-13	-0.623035	0.691275	1.26539e-18	0.951585	8870	0.00713528	0.318198	0.683201	0.397211	-0.114644	-1.01404	0.00859122	0.432842	Scaling	Buffering	Scaling	Scaling
1301	ZNF740	0.000336429	0.209838	0.74776	6.01366e-08	-0.22584	-0.402681	1.13491e-10	0.435678	8878	0.0151358	0.203498	0.398032	0.00836069	-0.228832	-0.466075	0.000100148	0.432329	Buffering	Buffering	Buffering	Buffering
1302	ZNF787	0.905989	-0.0104708	0.316255	0.000141219	-0.331576	0.986983	0.00175937	0.321105	8884	0.165348	0.132042	0.521686	0.0171778	-0.204767	-0.394806	0.00159123	0.336809	Buffering	Buffering	Buffering	Scaling
1303	ZNRF2	0.164075	0.133939	0.776277	0.000730258	-0.312125	1.77817	0.000105662	0.446064	8897	0.980776	-0.00251214	5.04743	0.259109	-0.17438	-1.75281	0.29815	0.171868	Buffering	Buffering	Buffering	Scaling
1304	ZW10	4.05099e-08	0.402815	-0.870456	2.74119e-08	-0.362844	-0.176322	4.07336e-17	0.765659	8906	0.170178	0.0590018	0.428796	0.148264	-0.0543875	-0.647501	0.0282256	0.113389	Buffering	Buffering	Scaling	Scaling

## Sheet: Protein_Gain_ChrmArm
	Chrm_Arm_Expression	Chromosome_Gained	Difference_Protein_Gain	Difference.Loss	Difference_RNA_Gain	Difference_RNA_Loss
1	19q	2q	-0.0037833	-0.0301175	-0.00196472	0.0131684
2	12q	2q	-0.00359514	0.000369794	-0.0436877	0.153357
3	2q	2q	0.0596244	-0.085745	0.100039	-0.302209
4	6p	2q	-0.0130114	0.0178313	-0.036425	0.166986
5	11q	2q	-0.03217	-0.0395978	-0.0878856	-0.0745074
6	9p	2q	-0.0197213	0.0475456	-0.126848	0.128508
7	4p	2q	0.0255982	0.0292146	-0.108782	0.0660731
8	21q	2q	0.0166979	-0.0288332	-0.105139	-0.0604137
9	7p	2q	0.0401926	0.000858231	0.102708	0.0307203
10	18p	2q	0.00859989	0.082744	-0.154524	0.147502
11	5p	2q	0.00531899	0.00585951	-0.0234375	0.0348065
12	19q	4p	0.00244937	0.00463776	0.000358686	0.0583381
13	12q	4p	0.0183278	0.0212371	0.0843806	0.084866
14	2q	4p	0.00281634	-0.000482695	0.0237656	0.0143737
15	6p	4p	0.0160311	-0.00516405	-0.0107222	-0.00349457
16	11q	4p	-0.00251375	-0.0173206	0.0114511	0.00186398
17	9p	4p	-0.00434803	0.0387254	-0.0513319	0.0823555
18	4p	4p	0.066112	-0.17174	0.189338	-0.422896
19	21q	4p	-0.00192589	-0.00229496	0.00227826	0.0352857
20	7p	4p	0.0165832	0.00222873	0.0380582	0.030293
21	18p	4p	0.0123918	0.00898178	0.0347201	-0.036516
22	5p	4p	-0.0267374	0.00691815	-0.0736847	0.0476152
23	19q	5p	0.0427039	0.0553307	0.116741	0.156572
24	12q	5p	-0.0252108	-0.00382421	-0.0743045	0.0359097
25	2q	5p	-0.00544917	-0.00106091	-0.0419064	0.0279543
26	6p	5p	0.0129677	-0.0104197	0.0449045	-0.0448783
27	11q	5p	-0.0135561	-0.0154842	-0.0427124	-0.0314469
28	9p	5p	0.0818199	0.0535785	0.215943	0.121312
29	4p	5p	0.00370335	-0.0268357	-0.0204348	-0.0540542
30	21q	5p	0.000884049	0.0339444	-0.0173578	0.115491
31	7p	5p	-0.00388251	-0.000209401	-0.0166345	0.00876908
32	18p	5p	0.0518582	0.0602935	0.052539	0.290867
33	5p	5p	0.158539	-0.158267	0.4134	-0.304768
34	19q	6p	-0.0318007	0.0178025	-0.0370068	0.0485061
35	12q	6p	0.0124019	0.0185738	0.0693222	0.0918152
36	2q	6p	-0.0178005	0.0123426	-0.0473039	0.0687723
37	6p	6p	0.106343	-0.128972	0.273666	-0.374317
38	11q	6p	-0.00698745	-0.0412401	0.00650483	-0.0602468
39	9p	6p	-0.0111707	0.0714506	0.0138171	0.228503
40	4p	6p	-0.00412295	-0.032359	-0.016745	0.0178912
41	21q	6p	-0.0223345	-0.0120658	-0.0118495	0.100146
42	7p	6p	0.014282	-0.012744	0.0570389	-0.00931612
43	18p	6p	0.0299411	-0.0328472	0.131343	-0.0848757
44	5p	6p	0.00466224	-0.00766706	0.027067	0.0442819
45	19q	7p	0.0224202	0.0163798	0.0947314	0.0935622
46	12q	7p	-0.00121506	0.0160327	0.0210438	0.0769651
47	2q	7p	-0.00772316	-0.00355515	-0.0331235	0.0372237
48	6p	7p	-0.00734897	-0.0290876	0.000931896	-0.041002
49	11q	7p	-0.0157104	0.00264748	-0.0333626	0.0729743
50	9p	7p	-0.0400046	0.00305178	-0.126531	0.0550589
51	4p	7p	0.00279234	0.0581954	-0.0133091	0.183447
52	21q	7p	0.0169958	-0.000672283	0.115384	0.0939585
53	7p	7p	0.0704381	-0.113419	0.221935	-0.337636
54	18p	7p	-0.00732004	-0.0103584	0.0437451	0.102204
55	5p	7p	-0.0576021	-0.00606566	-0.0922842	0.0128331
56	19q	9p	0.0431131	0.00945884	0.139933	0.0354008
57	12q	9p	-0.000608224	-0.000265753	-0.00865464	0.0142584
58	2q	9p	-0.0030754	-0.015893	-0.0270216	-0.0333718
59	6p	9p	0.0246068	0.0100409	0.0524429	0.0181006
60	11q	9p	-0.022369	-0.00979958	-0.0543262	-0.0248114
61	9p	9p	0.129815	-0.173299	0.342446	-0.509137
62	4p	9p	0.000216177	-0.0215224	-0.019446	-0.0184477
63	21q	9p	0.0177255	-0.0126462	0.0244018	0.0225725
64	7p	9p	0.00553926	0.0107198	0.0396738	0.0539398
65	18p	9p	-0.014867	0.0011726	-0.0429246	0.0993721
66	5p	9p	-0.00122032	-0.0340094	0.0675059	-0.044215
67	19q	11q	0.0100758	0.044484	0.0694226	0.115956
68	12q	11q	-0.0360844	-0.00429705	-0.0771397	-0.000344317
69	2q	11q	0.00984538	0.0123905	0.0513383	0.0366059
70	6p	11q	0.000234072	-0.00730278	0.0498556	-0.00415768
71	11q	11q	0.0822697	-0.0925739	0.24843	-0.275444
72	9p	11q	-0.0163096	0.0646924	-0.0198982	0.153536
73	4p	11q	0.014481	0.0125054	0.0804932	-0.0104987
74	21q	11q	-0.0399638	-0.0268661	-0.00400657	-0.0323425
75	7p	11q	0.0192178	0.036752	0.0548815	0.108316
76	18p	11q	0.0196774	0.000344188	0.0609214	0.00894232
77	5p	11q	-0.0557579	0.0476382	-0.0879452	0.17328
78	19q	12q	0.0249666	-0.0017204	0.0614118	0.0668733
79	12q	12q	0.0736237	-0.130722	0.190936	-0.374082
80	2q	12q	-0.0201108	0.0171292	-0.074624	0.0746471
81	6p	12q	-0.0235803	0.0363802	-0.0611761	0.147171
82	11q	12q	-0.00827859	0.052856	-0.0300001	0.1547
83	9p	12q	-0.0512661	-0.0189217	-0.184652	-0.00749447
84	4p	12q	0.0162666	0.0191326	0.00620886	0.038444
85	21q	12q	0.00752139	-0.0181216	-0.0114719	-0.0655812
86	7p	12q	-0.00202644	0.0126727	-0.016901	0.0567604
87	18p	12q	0.0356342	0.0472183	0.00116679	0.118828
88	5p	12q	-0.0187084	-0.000155801	-0.0251914	0.0496462
89	19q	18p	-0.0298246	-0.00315971	-0.0843122	0.0652291
90	12q	18p	-0.00714336	-0.00318052	-0.0317202	0.0119667
91	2q	18p	0.00357997	0.018364	0.0312751	0.0606057
92	6p	18p	0.00405767	-0.00784042	0.00243831	-0.00480314
93	11q	18p	0.00291354	-0.00299732	0.00639574	0.0391349
94	9p	18p	0.0187824	0.0523216	-0.0432943	0.157752
95	4p	18p	-0.0548453	-0.0308096	-0.0725575	-0.0717937
96	21q	18p	0.00766581	-0.0203457	0.0999641	0.00228227
97	7p	18p	-0.0202941	-0.00396443	-0.010171	0.0157912
98	18p	18p	0.105212	-0.0958652	0.407734	-0.293272
99	5p	18p	-0.102449	-0.0054755	-0.135573	0.0392509
100	19q	19q	0.0850224	-0.1271	0.295373	-0.344449
101	12q	19q	0.00560105	0.0261659	0.0911427	0.146564
102	2q	19q	-0.028267	-0.0125284	-0.0444957	-0.0479772
103	6p	19q	-0.0252597	0.0321518	-0.0314199	0.0921958
104	11q	19q	-0.0291216	-0.0265824	-0.0315427	-0.015165
105	9p	19q	-0.00275173	-0.00652583	-0.0135477	-0.000736626
106	4p	19q	-0.059	-0.0224832	-0.160047	-0.0761051
107	21q	19q	-0.0678379	-0.0175358	-0.0944302	-0.105621
108	7p	19q	0.0280133	0.048816	0.187957	0.128001
109	18p	19q	0.011095	0.0708803	0.00606776	0.122851
110	5p	19q	0.0444057	-0.0238831	0.145778	-0.0879534
111	19q	21q	0.0617355	-0.0105542	0.218144	-0.0242101
112	12q	21q	0.0420242	-0.0426983	0.149339	-0.0865169
113	2q	21q	-0.00896833	0.007563	-0.017987	0.0465804
114	6p	21q	-0.0495072	-0.0112932	-0.130377	-0.00807024
115	11q	21q	-0.0423216	-0.011736	-0.0557954	-0.000633372
116	9p	21q	-0.0316826	0.00811959	-0.135196	0.0500438
117	4p	21q	-0.0285182	0.0166699	-0.102742	0.060969
118	21q	21q	0.0728632	-0.152634	0.211555	-0.383299
119	7p	21q	-0.00587725	-0.0220867	0.0723527	-0.0104519
120	18p	21q	0.00097122	0.0229392	0.0127383	0.0243645
121	5p	21q	-0.010799	0.0492305	0.0223994	0.146904

## Sheet: Ovarian_Buffered_enrichment
Terms enriched in RNAs and proteins buffered upon chromosome gain or loss in ovarian tumor samples.
	Terms identified in g:profiler
Terms enriched in buffered proteins upon chromosome gain
	query	significant	p_value	term_size	query_size	intersection_size	precision	recall	term_id	source	term_name	effective_domain_size	source_order	parents
1	query_1	TRUE	0.0161787	480	1082	438	0.404806	0.9125	CORUM:0000000	CORUM	CORUM root	1274	1
Terms enriched in buffered proteins upon chromosome loss
	query	significant	p_value	term_size	query_size	intersection_size	precision	recall	term_id	source	term_name	effective_domain_size	source_order	parents
1	query_1	TRUE	0.000894655	480	1011	419	0.414441	0.872917	CORUM:0000000	CORUM	CORUM root	1274	1
2	query_1	TRUE	0.0466077	491	1011	423	0.418398	0.861507	GO:0043228	GO:CC	non-membrane-bounded organelle	1274	2129	GO:0043226
Terms enriched in buffered RNA upon chromosome gain
	NA
Terms enriched in buffered RNA upon chromosome loss
	query	significant	p_value	term_size	query_size	intersection_size	precision	recall	term_id	source	term_name	effective_domain_size	source_order	parents
1	query_1	TRUE	0.000629894	45	340	30	0.0882353	0.666667	GO:0030312	GO:CC	external encapsulating structure	1274	1094	GO:0071944 GO:0110165
2	query_1	TRUE	0.000629894	45	340	30	0.0882353	0.666667	GO:0031012	GO:CC	extracellular matrix	1274	1199	GO:0030312
3	query_1	TRUE	0.00088846	41	340	28	0.0823529	0.682927	GO:0062023	GO:CC	collagen-containing extracellular matrix	1274	2679	GO:0031012

## Sheet: ROC_AUC_Ovarian
	data	Chrm_CN	Gene_Type	Category	p_value	Corr_coef	significant	ROCauc
cor	Protein-protein interaction	Gain	Protein	Buffering	0.549498	0.0165005	FALSE	0.606206
cor1	Protein-protein interaction	Loss	Protein	Buffering	0.107556	0.0443478	FALSE	0.572628
cor2	Protein-protein interaction	Gain	Protein	Anti-Scaling	0.549498	0.0165005	FALSE	0.635985
cor3	Protein-protein interaction	Loss	Protein	Anti-Scaling	0.107556	0.0443478	FALSE	0.579823
cor4	Protein-protein interaction	Gain	Protein	Scaling	0.549498	0.0165005	FALSE	0.571817
cor5	Protein-protein interaction	Loss	Protein	Scaling	0.107556	0.0443478	FALSE	0.56429
cor6	Protein complex (CORUM)	Gain	Protein	Buffering	0.0274515	-0.0607392	TRUE	0.586115
cor7	Protein complex (CORUM)	Loss	Protein	Buffering	1.89632e-07	0.142887	TRUE	0.585117
cor8	Protein complex (CORUM)	Gain	Protein	Anti-Scaling	0.0274515	-0.0607392	TRUE	0.434703
cor9	Protein complex (CORUM)	Loss	Protein	Anti-Scaling	1.89632e-07	0.142887	TRUE	0.4764
cor10	Protein complex (CORUM)	Gain	Protein	Scaling	0.0274515	-0.0607392	TRUE	0.409113
cor11	Protein complex (CORUM)	Loss	Protein	Scaling	1.89632e-07	0.142887	TRUE	0.406449
cor12	Protein regulatory sites	Gain	Protein	Buffering	0.0201369	0.0640038	TRUE	0.506868
cor13	Protein regulatory sites	Loss	Protein	Buffering	0.945436	-0.00188694	FALSE	0.50313
cor14	Protein regulatory sites	Gain	Protein	Anti-Scaling	0.0201369	0.0640038	TRUE	0.478654
cor15	Protein regulatory sites	Loss	Protein	Anti-Scaling	0.945436	-0.00188694	FALSE	0.494428
cor16	Protein regulatory sites	Gain	Protein	Scaling	0.0201369	0.0640038	TRUE	0.504471
cor17	Protein regulatory sites	Loss	Protein	Scaling	0.945436	-0.00188694	FALSE	0.497784
cor18	Sumoylation sites	Gain	Protein	Buffering	0.319756	0.027427	FALSE	0.531922
cor19	Sumoylation sites	Loss	Protein	Buffering	0.285549	0.0294379	FALSE	0.525506
cor20	Sumoylation sites	Gain	Protein	Anti-Scaling	0.319756	0.027427	FALSE	0.456737
cor21	Sumoylation sites	Loss	Protein	Anti-Scaling	0.285549	0.0294379	FALSE	0.492892
cor22	Sumoylation sites	Gain	Protein	Scaling	0.319756	0.027427	FALSE	0.480151
cor23	Sumoylation sites	Loss	Protein	Scaling	0.285549	0.0294379	FALSE	0.471976
cor24	Ubiquitination sites	Gain	Protein	Buffering	0.409679	0.0227283	FALSE	0.570637
cor25	Ubiquitination sites	Loss	Protein	Buffering	0.135578	0.0411315	FALSE	0.543828
cor26	Ubiquitination sites	Gain	Protein	Anti-Scaling	0.409679	0.0227283	FALSE	0.604627
cor27	Ubiquitination sites	Loss	Protein	Anti-Scaling	0.135578	0.0411315	FALSE	0.526037
cor28	Ubiquitination sites	Gain	Protein	Scaling	0.409679	0.0227283	FALSE	0.537465
cor29	Ubiquitination sites	Loss	Protein	Scaling	0.135578	0.0411315	FALSE	0.544557
cor30	Phosphorylation sites	Gain	Protein	Buffering	0.29445	0.0288998	FALSE	0.584011
cor31	Phosphorylation sites	Loss	Protein	Buffering	0.130307	0.041694	FALSE	0.555294
cor32	Phosphorylation sites	Gain	Protein	Anti-Scaling	0.29445	0.0288998	FALSE	0.620807
cor33	Phosphorylation sites	Loss	Protein	Anti-Scaling	0.130307	0.041694	FALSE	0.469902
cor34	Phosphorylation sites	Gain	Protein	Scaling	0.29445	0.0288998	FALSE	0.547193
cor35	Phosphorylation sites	Loss	Protein	Scaling	0.130307	0.041694	FALSE	0.55693
cor36	Methylation sites	Gain	Protein	Buffering	0.483257	0.0193276	FALSE	0.541382
cor37	Methylation sites	Loss	Protein	Buffering	0.411392	0.0226453	FALSE	0.503817
cor38	Methylation sites	Gain	Protein	Anti-Scaling	0.483257	0.0193276	FALSE	0.401749
cor39	Methylation sites	Loss	Protein	Anti-Scaling	0.411392	0.0226453	FALSE	0.515069
cor40	Methylation sites	Gain	Protein	Scaling	0.483257	0.0193276	FALSE	0.50489
cor41	Methylation sites	Loss	Protein	Scaling	0.411392	0.0226453	FALSE	0.491608
cor42	Acetylation sites	Gain	Protein	Buffering	0.155351	0.0391603	FALSE	0.50603
cor43	Acetylation sites	Loss	Protein	Buffering	0.469465	-0.0199416	FALSE	0.480317
cor44	Acetylation sites	Gain	Protein	Anti-Scaling	0.155351	0.0391603	FALSE	0.473929
cor45	Acetylation sites	Loss	Protein	Anti-Scaling	0.469465	-0.0199416	FALSE	0.510518
cor46	Acetylation sites	Gain	Protein	Scaling	0.155351	0.0391603	FALSE	0.509249
cor47	Acetylation sites	Loss	Protein	Scaling	0.469465	-0.0199416	FALSE	0.520317
cor48	Percent gene amplification	Gain	Protein	Buffering	0.182343	0.0367977	FALSE	0.506842
cor49	Percent gene amplification	Loss	Protein	Buffering	0.336749	0.0265107	FALSE	0.514855
cor50	Percent gene amplification	Gain	Protein	Anti-Scaling	0.182343	0.0367977	FALSE	0.432224
cor51	Percent gene amplification	Loss	Protein	Anti-Scaling	0.336749	0.0265107	FALSE	0.487305
cor52	Percent gene amplification	Gain	Protein	Scaling	0.182343	0.0367977	FALSE	0.538238
cor53	Percent gene amplification	Loss	Protein	Scaling	0.336749	0.0265107	FALSE	0.485909
cor54	RNA neutral variance	Gain	Protein	Buffering	0.000714678	-0.0930949	TRUE	0.627085
cor55	RNA neutral variance	Loss	Protein	Buffering	0.179223	-0.0370195	FALSE	0.650265
cor56	RNA neutral variance	Gain	Protein	Anti-Scaling	0.000714678	-0.0930949	TRUE	0.681818
cor57	RNA neutral variance	Loss	Protein	Anti-Scaling	0.179223	-0.0370195	FALSE	0.745565
cor58	RNA neutral variance	Gain	Protein	Scaling	0.000714678	-0.0930949	TRUE	0.572064
cor59	RNA neutral variance	Loss	Protein	Scaling	0.179223	-0.0370195	FALSE	0.612087
cor60	Protein neutral variance	Gain	Protein	Buffering	0.075783	-0.0492475	FALSE	0.575344
cor61	Protein neutral variance	Loss	Protein	Buffering	0.00284518	-0.082667	TRUE	0.596922
cor62	Protein neutral variance	Gain	Protein	Anti-Scaling	0.075783	-0.0492475	FALSE	0.619138
cor63	Protein neutral variance	Loss	Protein	Anti-Scaling	0.00284518	-0.082667	TRUE	0.626394
cor64	Protein neutral variance	Gain	Protein	Scaling	0.075783	-0.0492475	FALSE	0.533497
cor65	Protein neutral variance	Loss	Protein	Scaling	0.00284518	-0.082667	TRUE	0.580453
cor66	mRNA decay rate	Gain	Protein	Buffering	0.464411	0.0335059	FALSE	0.543139
cor67	mRNA decay rate	Loss	Protein	Buffering	0.268684	0.0506388	FALSE	0.524044
cor68	mRNA decay rate	Gain	Protein	Anti-Scaling	0.464411	0.0335059	FALSE	0.493164
cor69	mRNA decay rate	Loss	Protein	Anti-Scaling	0.268684	0.0506388	FALSE	0.522532
cor70	mRNA decay rate	Gain	Protein	Scaling	0.464411	0.0335059	FALSE	0.553542
cor71	mRNA decay rate	Loss	Protein	Scaling	0.268684	0.0506388	FALSE	0.531915
cor72	mRNA abundance	Gain	Protein	Buffering	0.00634249	-0.0852466	TRUE	0.515704
cor73	mRNA abundance	Loss	Protein	Buffering	0.719549	0.0112341	FALSE	0.526371
cor74	mRNA abundance	Gain	Protein	Anti-Scaling	0.00634249	-0.0852466	TRUE	0.543893
cor75	mRNA abundance	Loss	Protein	Anti-Scaling	0.719549	0.0112341	FALSE	0.502798
cor76	mRNA abundance	Gain	Protein	Scaling	0.00634249	-0.0852466	TRUE	0.497001
cor77	mRNA abundance	Loss	Protein	Scaling	0.719549	0.0112341	FALSE	0.531257
cor78	Protein abundance	Gain	Protein	Buffering	0.00665759	-0.0847479	TRUE	0.487346
cor79	Protein abundance	Loss	Protein	Buffering	0.638439	-0.014701	FALSE	0.521302
cor80	Protein abundance	Gain	Protein	Anti-Scaling	0.00665759	-0.0847479	TRUE	0.54141
cor81	Protein abundance	Loss	Protein	Anti-Scaling	0.638439	-0.014701	FALSE	0.480782
cor82	Protein abundance	Gain	Protein	Scaling	0.00665759	-0.0847479	TRUE	0.506091
cor83	Protein abundance	Loss	Protein	Scaling	0.638439	-0.014701	FALSE	0.529261
cor84	Protein length	Gain	Protein	Buffering	0.170969	0.042817	FALSE	0.579012
cor85	Protein length	Loss	Protein	Buffering	0.00177862	0.0975395	TRUE	0.549715
cor86	Protein length	Gain	Protein	Anti-Scaling	0.170969	0.042817	FALSE	0.600851
cor87	Protein length	Loss	Protein	Anti-Scaling	0.00177862	0.0975395	TRUE	0.538727
cor88	Protein length	Gain	Protein	Scaling	0.170969	0.042817	FALSE	0.557865
cor89	Protein length	Loss	Protein	Scaling	0.00177862	0.0975395	TRUE	0.56684
cor90	mRNA length	Gain	Protein	Buffering	0.0301949	0.06774	TRUE	0.488663
cor91	mRNA length	Loss	Protein	Buffering	0.616484	-0.0156694	FALSE	0.509109
cor92	mRNA length	Gain	Protein	Anti-Scaling	0.0301949	0.06774	TRUE	0.490647
cor93	mRNA length	Loss	Protein	Anti-Scaling	0.616484	-0.0156694	FALSE	0.459744
cor94	mRNA length	Gain	Protein	Scaling	0.0301949	0.06774	TRUE	0.488586
cor95	mRNA length	Loss	Protein	Scaling	0.616484	-0.0156694	FALSE	0.501045
cor96	Transcription rate	Gain	Protein	Buffering	0.00634249	-0.0852466	TRUE	0.515704
cor97	Transcription rate	Loss	Protein	Buffering	0.719548	0.0112341	FALSE	0.526371
cor98	Transcription rate	Gain	Protein	Anti-Scaling	0.00634249	-0.0852466	TRUE	0.543893
cor99	Transcription rate	Loss	Protein	Anti-Scaling	0.719548	0.0112341	FALSE	0.502798
cor100	Transcription rate	Gain	Protein	Scaling	0.00634249	-0.0852466	TRUE	0.497001
cor101	Transcription rate	Loss	Protein	Scaling	0.719548	0.0112341	FALSE	0.531257
cor102	Translation rate	Gain	Protein	Buffering	0.255394	-0.0355743	FALSE	0.496322
cor103	Translation rate	Loss	Protein	Buffering	0.134329	-0.0468205	FALSE	0.51243
cor104	Translation rate	Gain	Protein	Anti-Scaling	0.255394	-0.0355743	FALSE	0.559529
cor105	Translation rate	Loss	Protein	Anti-Scaling	0.134329	-0.0468205	FALSE	0.547045
cor106	Translation rate	Gain	Protein	Scaling	0.255394	-0.0355743	FALSE	0.530648
cor107	Translation rate	Loss	Protein	Scaling	0.134329	-0.0468205	FALSE	0.52555
cor108	Protein half life	Gain	Protein	Buffering	0.0561381	0.0552436	FALSE	0.532098
cor109	Protein half life	Loss	Protein	Buffering	0.095315	0.0482539	FALSE	0.602065
cor110	Protein half life	Gain	Protein	Anti-Scaling	0.0561381	0.0552436	FALSE	0.551705
cor111	Protein half life	Loss	Protein	Anti-Scaling	0.095315	0.0482539	FALSE	0.524788
cor112	Protein half life	Gain	Protein	Scaling	0.0561381	0.0552436	FALSE	0.514907
cor113	Protein half life	Loss	Protein	Scaling	0.095315	0.0482539	FALSE	0.62523
cor114	Loops in protein score	Gain	Protein	Buffering	0.91021	-0.00370897	FALSE	0.585312
cor115	Loops in protein score	Loss	Protein	Buffering	0.00290971	0.0976793	TRUE	0.575994
cor116	Loops in protein score	Gain	Protein	Anti-Scaling	0.91021	-0.00370897	FALSE	0.59992
cor117	Loops in protein score	Loss	Protein	Anti-Scaling	0.00290971	0.0976793	TRUE	0.492111
cor118	Loops in protein score	Gain	Protein	Scaling	0.91021	-0.00370897	FALSE	0.564108
cor119	Loops in protein score	Loss	Protein	Scaling	0.00290971	0.0976793	TRUE	0.592063
cor120	Intrinsic protein disorder	Gain	Protein	Buffering	0.712519	0.014986	FALSE	0.475242
cor121	Intrinsic protein disorder	Loss	Protein	Buffering	0.0494675	0.0797756	FALSE	0.534441
cor122	Intrinsic protein disorder	Gain	Protein	Anti-Scaling	0.712519	0.014986	FALSE	0.595292
cor123	Intrinsic protein disorder	Loss	Protein	Anti-Scaling	0.0494675	0.0797756	FALSE	0.537182
cor124	Intrinsic protein disorder	Gain	Protein	Scaling	0.712519	0.014986	FALSE	0.524882
cor125	Intrinsic protein disorder	Loss	Protein	Scaling	0.0494675	0.0797756	FALSE	0.53023
cor126	Low complexity score	Gain	Protein	Buffering	0.502592	-0.0227068	FALSE	0.557012
cor127	Low complexity score	Loss	Protein	Buffering	0.000747385	0.113837	TRUE	0.554789
cor128	Low complexity score	Gain	Protein	Anti-Scaling	0.502592	-0.0227068	FALSE	0.571857
cor129	Low complexity score	Loss	Protein	Anti-Scaling	0.000747385	0.113837	TRUE	0.565323
cor130	Low complexity score	Gain	Protein	Scaling	0.502592	-0.0227068	FALSE	0.540113
cor131	Low complexity score	Loss	Protein	Scaling	0.000747385	0.113837	TRUE	0.585036
cor132	Protein polarity	Gain	Protein	Buffering	0.350696	-0.0545264	FALSE	0.613459
cor133	Protein polarity	Loss	Protein	Buffering	0.256157	0.0663213	FALSE	0.600879
cor134	Protein polarity	Gain	Protein	Anti-Scaling	0.350696	-0.0545264	FALSE	0.654617
cor135	Protein polarity	Loss	Protein	Anti-Scaling	0.256157	0.0663213	FALSE	0.483014
cor136	Protein polarity	Gain	Protein	Scaling	0.350696	-0.0545264	FALSE	0.591076
cor137	Protein polarity	Loss	Protein	Scaling	0.256157	0.0663213	FALSE	0.621476
cor138	Protein polyampholyte score	Gain	Protein	Buffering	0.182285	0.0770825	FALSE	0.537284
cor139	Protein polyampholyte score	Loss	Protein	Buffering	0.660771	0.0253964	FALSE	0.493625
cor140	Protein polyampholyte score	Gain	Protein	Anti-Scaling	0.182285	0.0770825	FALSE	0.576104
cor141	Protein polyampholyte score	Loss	Protein	Anti-Scaling	0.660771	0.0253964	FALSE	0.635083
cor142	Protein polyampholyte score	Gain	Protein	Scaling	0.182285	0.0770825	FALSE	0.484136
cor143	Protein polyampholyte score	Loss	Protein	Scaling	0.660771	0.0253964	FALSE	0.517847
cor144	Homology score	Gain	Protein	Buffering	0.666302	-0.0130103	FALSE	0.505773
cor145	Homology score	Loss	Protein	Buffering	0.0168993	0.0719834	FALSE	0.530485
cor146	Homology score	Gain	Protein	Anti-Scaling	0.666302	-0.0130103	FALSE	0.502887
cor147	Homology score	Loss	Protein	Anti-Scaling	0.0168993	0.0719834	FALSE	0.485877
cor148	Homology score	Gain	Protein	Scaling	0.666302	-0.0130103	FALSE	0.507029
cor149	Homology score	Loss	Protein	Scaling	0.0168993	0.0719834	FALSE	0.532061
cor150	Dependency score	Gain	Protein	Buffering	0.11875	0.0432891	FALSE	0.601997
cor151	Dependency score	Loss	Protein	Buffering	1.82589e-05	-0.118544	TRUE	0.57684
cor152	Dependency score	Gain	Protein	Anti-Scaling	0.11875	0.0432891	FALSE	0.60184
cor153	Dependency score	Loss	Protein	Anti-Scaling	1.82589e-05	-0.118544	TRUE	0.558756
cor154	Dependency score	Gain	Protein	Scaling	0.11875	0.0432891	FALSE	0.59003
cor155	Dependency score	Loss	Protein	Scaling	1.82589e-05	-0.118544	TRUE	0.574748
cor156	Aggregation score	Gain	Protein	Buffering	0.00464945	-0.104081	TRUE	0.546267
cor157	Aggregation score	Loss	Protein	Buffering	0.359299	-0.0337919	FALSE	0.501344
cor158	Aggregation score	Gain	Protein	Anti-Scaling	0.00464945	-0.104081	TRUE	0.536078
cor159	Aggregation score	Loss	Protein	Anti-Scaling	0.359299	-0.0337919	FALSE	0.504191
cor160	Aggregation score	Gain	Protein	Scaling	0.00464945	-0.104081	TRUE	0.547089
cor161	Aggregation score	Loss	Protein	Scaling	0.359299	-0.0337919	FALSE	0.499635
cor162	Non-exponential decay delta	Gain	Protein	Buffering	0.000222022	-0.235244	TRUE	0.592149
cor163	Non-exponential decay delta	Loss	Protein	Buffering	0.0168406	0.153529	FALSE	0.508301
cor164	Non-exponential decay delta	Gain	Protein	Anti-Scaling	0.000222022	-0.235244	TRUE	0.690086
cor165	Non-exponential decay delta	Loss	Protein	Anti-Scaling	0.0168406	0.153529	FALSE	0.514276
cor166	Non-exponential decay delta	Gain	Protein	Scaling	0.000222022	-0.235244	TRUE	0.501812
cor167	Non-exponential decay delta	Loss	Protein	Scaling	0.0168406	0.153529	FALSE	0.516316
cor168	Mutation count (all)	Gain	Protein	Buffering	0.714097	-0.0101007	FALSE	0.516879
cor169	Mutation count (all)	Loss	Protein	Buffering	0.000359018	0.0981502	TRUE	0.525533
cor170	Mutation count (all)	Gain	Protein	Anti-Scaling	0.714097	-0.0101007	FALSE	0.542537
cor171	Mutation count (all)	Loss	Protein	Anti-Scaling	0.000359018	0.0981502	TRUE	0.533708
cor172	Mutation count (all)	Gain	Protein	Scaling	0.714097	-0.0101007	FALSE	0.503784
cor173	Mutation count (all)	Loss	Protein	Scaling	0.000359018	0.0981502	TRUE	0.538679
cor174	Mutation count (frame shifts)	Gain	Protein	Buffering	0.90864	-0.00316388	FALSE	0.501085
cor175	Mutation count (frame shifts)	Loss	Protein	Buffering	0.130836	0.0416368	FALSE	0.522056
cor176	Mutation count (frame shifts)	Gain	Protein	Anti-Scaling	0.90864	-0.00316388	FALSE	0.490015
cor177	Mutation count (frame shifts)	Loss	Protein	Anti-Scaling	0.130836	0.0416368	FALSE	0.49331
cor178	Mutation count (frame shifts)	Gain	Protein	Scaling	0.90864	-0.00316388	FALSE	0.50551
cor179	Mutation count (frame shifts)	Loss	Protein	Scaling	0.130836	0.0416368	FALSE	0.524092
cor180	Mutation count (nonsence and missense)	Gain	Protein	Buffering	0.886046	-0.00395117	FALSE	0.521021
cor181	Mutation count (nonsence and missense)	Loss	Protein	Buffering	0.000309006	0.0992209	TRUE	0.52792
cor182	Mutation count (nonsence and missense)	Gain	Protein	Anti-Scaling	0.886046	-0.00395117	FALSE	0.544831
cor183	Mutation count (nonsence and missense)	Loss	Protein	Anti-Scaling	0.000309006	0.0992209	TRUE	0.538404
cor184	Mutation count (nonsence and missense)	Gain	Protein	Scaling	0.886046	-0.00395117	FALSE	0.498797
cor185	Mutation count (nonsence and missense)	Loss	Protein	Scaling	0.000309006	0.0992209	TRUE	0.542697
cor186	5' UTR length	Gain	Protein	Buffering	0.822213	-0.00462781	FALSE	0.507876
cor187	5' UTR length	Loss	Protein	Buffering	0.16888	0.0283299	FALSE	0.507905
cor188	3' UTR length	Gain	Protein	Buffering	0.146664	0.034054	FALSE	0.510654
cor189	3' UTR length	Loss	Protein	Buffering	0.478706	-0.0166242	FALSE	0.543373
